# Supplementary material for: Combining genomic and epidemiological data to compare the transmissibility of SARS-CoV-2 lineages
Source: bioRxiv or medRxiv preprint supplement (doi:10.1101/2021.07.01.21259859), 2021-07-02
Supplement: Supplementary file [file media-1.pdf]

We gratefully acknowledge the following Authors from the Originating laboratories responsible for obtaining the specimens, as well as the Submitting laboratories where the genome data were generated and shared via GISAID, on which this research is based.

All Submitters of data may be contacted directly via [www.gisaid.org](http://www.gisaid.org)

Authors are sorted alphabetically.

| Accession ID                                                                                                                           | Originating Laboratory                                                                                                                                                                     | Submitting Laboratory                                                                                                                  | Authors                                                                                                                                                                                                                                                                                                                                                                                                                         |
|----------------------------------------------------------------------------------------------------------------------------------------|--------------------------------------------------------------------------------------------------------------------------------------------------------------------------------------------|----------------------------------------------------------------------------------------------------------------------------------------|---------------------------------------------------------------------------------------------------------------------------------------------------------------------------------------------------------------------------------------------------------------------------------------------------------------------------------------------------------------------------------------------------------------------------------|
| EPI_ISL_1000816                                                                                                                        | Bioinformatics and Biostatistics Lab, Advanced Sequencing Facility                                                                                                                         | COVID-19 Genomics UK (COG-UK) Consortium                                                                                               | Aengus Stewart,Jerome Nicod,Chelsea Sawyer,Laura Cubitt,Harshil Patel,Margaret Crawford                                                                                                                                                                                                                                                                                                                                         |
| EPI_ISL_1000968                                                                                                                        | Cerballiance Provence                                                                                                                                                                      | Cerba                                                                                                                                  | Roig JC, Haim-Boukobza S, Meyer S, Trombert-Paolantoni S, Lecorche E, Roquebert B                                                                                                                                                                                                                                                                                                                                               |
| EPI_ISL_1001209                                                                                                                        | National Virus Reference Laboratory                                                                                                                                                        | National Virus Reference Laboratory                                                                                                    | Michael Carr, Gabriel Gonzalez, Zoe Yandle, Jonathan Dean, Cillian F De Gascun                                                                                                                                                                                                                                                                                                                                                  |
| EPI_ISL_1001313                                                                                                                        | Hopital                                                                                                                                                                                    | National Reference Center for Viruses of Respiratory Infections, Institut Pasteur, Paris                                               | Marion Barbet, Sylvie Behillil, Méline Bizard, Angela Brisebarre, Camille Capel, Etienne Simon-Lorière, Vincent Enouf, Maud Vanpeene, Sylvie van der Werf,Martres Pascale                                                                                                                                                                                                                                                       |
| EPI_ISL_1001327, EPI_ISL_1001346                                                                                                       | hopital                                                                                                                                                                                    | National Reference Center for Viruses of Respiratory Infections, Institut Pasteur, Paris                                               | Marion Barbet, Sylvie Behillil, Méline Bizard, Angela Brisebarre, Camille Capel, Etienne Simon-Lorière, Vincent Enouf, Maud Vanpeene, Sylvie van der Werf,Stoessel-Thouvenin Patricia                                                                                                                                                                                                                                           |
| EPI_ISL_1001382                                                                                                                        | hopital                                                                                                                                                                                    | National Reference Center for Viruses of Respiratory Infections, Institut Pasteur, Paris                                               | Marion Barbet, Sylvie Behillil, Méline Bizard, Angela Brisebarre, Camille Capel, Etienne Simon-Lorière, Vincent Enouf, Maud Vanpeene, Sylvie van der Werf,Guignon AuréLie                                                                                                                                                                                                                                                       |
| EPI_ISL_1006507, EPI_ISL_1006681, EPI_ISL_1007011                                                                                      | Lighthouse Lab in Milton Keynes                                                                                                                                                            | Wellcome Sanger Institute for the COVID-19 Genomics UK (COG-UK) Consortium                                                             | The Lighthouse Lab in Milton Keynes and Alex Alderton, Roberto Amato, Sonia Goncalves, Ewan Harrison, David K. Jackson, Ian Johnston, Dominic Kwiatkowski, Cordelia Langford, John Sillitoe on behalf of the Wellcome Sanger Institute COVID-19 Surveillance Team                                                                                                                                                               |
| EPI_ISL_1007378, EPI_ISL_1007544                                                                                                       | Lighthouse Lab in Cambridge                                                                                                                                                                | Wellcome Sanger Institute for the COVID-19 Genomics UK (COG-UK) Consortium                                                             | Rob Howes, The Lighthouse Lab in Cambridge and Alex Alderton, Roberto Amato, Sonia Goncalves, Ewan Harrison, David K. Jackson, Ian Johnston, Dominic Kwiatkowski, Cordelia Langford, John Sillitoe on behalf of the Wellcome Sanger Institute COVID-19 Surveillance Team                                                                                                                                                        |
| EPI_ISL_1007605                                                                                                                        | ADMED                                                                                                                                                                                      | Laboratory of genomics and metagenomics, Institute of Microbiology, University Hospital Centre and University of Lausanne, Switzerland | Trestan Pillonel, Damien Jacot, Sébastien Aeby, Gilbert Greub, Claire Bertelli                                                                                                                                                                                                                                                                                                                                                  |
| EPI_ISL_1007825, EPI_ISL_1007832                                                                                                       | Hospital Universitario Marqués de Valdecilla - IDIVAL (Santander, Cantabria)                                                                                                               | SeqCOVID-SPAIN consortium/IBV(CSIC)                                                                                                    | Mónica Gozalo Margüello, María Elicer Cano García, Jose Manuel Méndez Legaza, Daniel Pablo Marcos, Jesús Rodríguez Rodríguez, María Siller Ruiz and SeqCOVID-SPAIN consortium                                                                                                                                                                                                                                                   |
| EPI_ISL_1007975                                                                                                                        | genXone SA, Molecular Diagnostics Laboratory / NZOZ                                                                                                                                        | genXone SA, Research & Development Laboratory                                                                                          | Maciej Sykalski, Grzegorz Nowicki, Jakub Grabowski, Natalia Drwska-Matelska, Anna Brylak-Baszków, Aleksandra Gidlewicz, Karol Szeszko, ukasz Krych, Micha Kaszuba                                                                                                                                                                                                                                                               |
| EPI_ISL_1008076                                                                                                                        | Austrian Agency for Health and Food Safety (AGES)                                                                                                                                          | Bergthaler laboratory, CeMM Research Center for Molecular Medicine of the Austrian Academy of Sciences                                 | Lukas Enderl, Anna Schedl, Thomas Penz, Benedikt Agerer, Maelle Le Moing, Michael Schuster, Bekir Erguner, Jan Laine, Martin Senekowitsch, Christoph Bock, Andreas Bergthaler                                                                                                                                                                                                                                                   |
| EPI_ISL_1008616, EPI_ISL_1008620, EPI_ISL_1008630, EPI_ISL_1008636, EPI_ISL_1008637, EPI_ISL_1008638, EPI_ISL_1008639, EPI_ISL_1008646 | Ministry of Health Turkey                                                                                                                                                                  | Ministry of Health Turkey                                                                                                              | Fatma Bayraktar, Yasemin Cogun, Süleyman Yalcin, Aye Baak Alta, Gülay Korukluolu                                                                                                                                                                                                                                                                                                                                                |
| EPI_ISL_1008678                                                                                                                        | Presidio di Brindisi Di Summa - Perrino                                                                                                                                                    | Istituto Zooprofilattico Sperimentale della Puglia e della Basilicata                                                                  | Parisi A., Bianco A., Capozzi L., Del Sambro L., Simone D., Chironna M., Loconsole D., Sallustio A., Ridolfi D.                                                                                                                                                                                                                                                                                                                 |
| EPI_ISL_1008692, EPI_ISL_1008695, EPI_ISL_1008699                                                                                      | Istituto Zooprofilattico Sperimentale della Puglia e della Basilicata                                                                                                                      | Istituto Zooprofilattico Sperimentale della Puglia e della Basilicata                                                                  | Parisi A., Bianco A., Capozzi L., Del Sambro L., Simone D., Chironna M., Loconsole D., Sallustio A., Giannico A.                                                                                                                                                                                                                                                                                                                |
| EPI_ISL_1008703                                                                                                                        | Presidio di Brindisi Di Summa - Perrino                                                                                                                                                    | Istituto Zooprofilattico Sperimentale della Puglia e della Basilicata                                                                  | Parisi A., Bianco A., Capozzi L., Del Sambro L., Simone D., Chironna M., Loconsole D., Sallustio A., Ridolfi D.                                                                                                                                                                                                                                                                                                                 |
| EPI_ISL_1008893, EPI_ISL_1008895                                                                                                       | IL Dept. of Public Health Springfield Laboratory                                                                                                                                           | Pathogen Discovery, Respiratory Viruses Branch, Division of Viral Diseases, Centers for Disease Control and Prevention                 | Ying Tao, Jing Zhang, Yan Li, Krista Queen, Anna Uehara, Peter Cook, Clinton R. Paden, Haibin Wang, Suxiang Tong                                                                                                                                                                                                                                                                                                                |
| EPI_ISL_1008902, EPI_ISL_1008903                                                                                                       | PA Department of Health, Bureau of Laboratories                                                                                                                                            | Pathogen Discovery, Respiratory Viruses Branch, Division of Viral Diseases, Centers for Disease Control and Prevention                 | Ying Tao, Jing Zhang, Yan Li, Krista Queen, Anna Uehara, Peter Cook, Clinton R. Paden, Haibin Wang, Suxiang Tong                                                                                                                                                                                                                                                                                                                |
| EPI_ISL_1008921, EPI_ISL_1008923                                                                                                       | LA Office of Public Health Laboratories                                                                                                                                                    | Pathogen Discovery, Respiratory Viruses Branch, Division of Viral Diseases, Centers for Disease Control and Prevention                 | Ying Tao, Jing Zhang, Yan Li, Krista Queen, Anna Uehara, Peter Cook, Clinton R. Paden, Haibin Wang, Suxiang Tong                                                                                                                                                                                                                                                                                                                |
| EPI_ISL_1008991, EPI_ISL_1008996                                                                                                       | Hospital Universitario Marqués de Valdecilla - IDIVAL (Santander, Cantabria)                                                                                                               | SeqCOVID-SPAIN consortium/IBV(CSIC)                                                                                                    | Mónica Gozalo Margüello, María Elicer Cano García, Jose Manuel Méndez Legaza, Daniel Pablo Marcos, Jesús Rodríguez Rodríguez, María Siller Ruiz and SeqCOVID-SPAIN consortium                                                                                                                                                                                                                                                   |
| EPI_ISL_1009113                                                                                                                        | Servicio de Microbiología Clínica (Complejo Hospitalario de Navarra, Pamplona), Instituto de Investigación Sanitaria de Navarra (IdiSNA)                                                   | SeqCOVID-SPAIN consortium/IBV(CSIC)                                                                                                    | Carmen Ezpeleta Baquedano, Ana Navascués, Ana Miqueleiz and SeqCOVID-SPAIN consortium                                                                                                                                                                                                                                                                                                                                           |
| EPI_ISL_1009125, EPI_ISL_1009126                                                                                                       | Yale Pathology Lab                                                                                                                                                                         | Grubaugh Lab - Yale School of Public Health                                                                                            | Tara Alpert, Joseph Fauver, Chen Liu, Pei Hui, Jianhui Wang, Susan Bell and Han Zhou, Anderson Brito, Mallery Breban, Anne Wyllie, Chantal Vogels, Mary Petrone, Chaney Kalinich, Isabel Ott, Arnau Casanovas, Catherine Muenker, Adam Moore, Alice Lu, Maria Tokuyama, Patrick Wong, Peiwen Lu, Saad Omer, Richard Martinello, Allison Nelson, Shelli Farhadian, Akiko Iwasaki, Charlese Dela Cruz, Albert Ko, Nathan Grubaugh |
| EPI_ISL_1009677                                                                                                                        | Diagnósticos da América - DASA                                                                                                                                                             | Instituto de Medicina Tropical de Sao Paulo                                                                                            | Brazil-UK Centre for Arbovirus Discovery Diagnosis Genomics and Epidemiology (CADDE) Genomic Network - Instituto de Medicina Tropical                                                                                                                                                                                                                                                                                           |
| EPI_ISL_1009957                                                                                                                        | Fulgent Genetics                                                                                                                                                                           | Fulgent Genetics                                                                                                                       | Harry Gao, Mickey Li, John Gao, Joseph Fierro, Benafsh Sapra, Becky Tsai, Yan Meng, Doreen Ng, James Xie                                                                                                                                                                                                                                                                                                                        |
| EPI_ISL_1010728                                                                                                                        | Department of Laboratory Medicine, National Taiwan University Hospital                                                                                                                     | Microbial Genomics Core Lab, National Taiwan University Centers of Genomic and Precision Medicine                                      | Shiou-Hwei Yeh, You-Yu Lin, Ya-Yun Lai, Chiao-Ling Li, Shan-Chwen Chang, Pei-Jer Chen, Sui-Yuan Chang                                                                                                                                                                                                                                                                                                                           |
| EPI_ISL_1012057                                                                                                                        | Lighthouse Lab in Alderley Park                                                                                                                                                            | Wellcome Sanger Institute for the COVID-19 Genomics UK (COG-UK) Consortium                                                             | Jacquelyn Wynn, Mairead Hyland, The Lighthouse Lab in Alderley Park and Alex Alderton, Roberto Amato, Sonia Goncalves, Ewan Harrison, David K. Jackson, Ian Johnston, Dominic Kwiatkowski, Cordelia Langford, John Sillitoe on behalf of the Wellcome Sanger Institute COVID-19 Surveillance Team                                                                                                                               |
| EPI_ISL_1012487, EPI_ISL_1012530                                                                                                       | Lighthouse Lab in Milton Keynes                                                                                                                                                            | Wellcome Sanger Institute for the COVID-19 Genomics UK (COG-UK) Consortium                                                             | The Lighthouse Lab in Milton Keynes and Alex Alderton, Roberto Amato, Sonia Goncalves, Ewan Harrison, David K. Jackson, Ian Johnston, Dominic Kwiatkowski, Cordelia Langford, John Sillitoe on behalf of the Wellcome Sanger Institute COVID-19 Surveillance Team                                                                                                                                                               |
| EPI_ISL_1012827                                                                                                                        | Lighthouse Lab in Alderley Park                                                                                                                                                            | Wellcome Sanger Institute for the COVID-19 Genomics UK (COG-UK) Consortium                                                             | Jacquelyn Wynn, Mairead Hyland, The Lighthouse Lab in Alderley Park and Alex Alderton, Roberto Amato, Sonia Goncalves, Ewan Harrison, David K. Jackson, Ian Johnston, Dominic Kwiatkowski, Cordelia Langford, John Sillitoe on behalf of the Wellcome Sanger Institute COVID-19 Surveillance Team                                                                                                                               |
| EPI_ISL_1013007, EPI_ISL_1013015, EPI_ISL_1013053                                                                                      | Servicio de Microbiología, Laboratori Clínic Metropolitana Nord, Hospital Universitari Germans Trias i Pujol, Institut d'Investigació en Ciències de la Salut Germans Trias i Pujol (IGTP) | IrsiCaixa - Can Ruti CovidSeq                                                                                                          | Marc Noguera-Julian, Mariona Parera, María Casadellà, Pilar Armengol, Francesc Catala-Moll, Roger Paredes, Bonaventura Clotet Elisa Martró, Verónica Saludes, Anna Not, Ana Pérez, Montserrat Giménez, Ignacio Blanco, Cristina Esteban, Cristina Casañ, Antoni E. Bordoy, Adrián Antuori                                                                                                                                       |

|                                                                                                                                                                                                                                              |                                                                                                               |                                                                                                                         |                                                                                                                                                                                                                                                                                                                                                                                                                                                                                                                                                                                                        |
|----------------------------------------------------------------------------------------------------------------------------------------------------------------------------------------------------------------------------------------------|---------------------------------------------------------------------------------------------------------------|-------------------------------------------------------------------------------------------------------------------------|--------------------------------------------------------------------------------------------------------------------------------------------------------------------------------------------------------------------------------------------------------------------------------------------------------------------------------------------------------------------------------------------------------------------------------------------------------------------------------------------------------------------------------------------------------------------------------------------------------|
| EPI_ISL_1013152                                                                                                                                                                                                                              | CH de Mayotte                                                                                                 | National Reference Center for Viruses of Respiratory Infections, Institut Pasteur, Paris                                | Marion Barbet, Sylvie Behillil, Méline Bizard, Angela Brisebarre, Camille Capel, Etienne Simon-Lorière, Vincent Enouf, Maud Vanpeene, Sylvie van der Werf,Combe Patrice                                                                                                                                                                                                                                                                                                                                                                                                                                |
| EPI_ISL_1013214                                                                                                                                                                                                                              | Institut Pasteur de Guadeloupe                                                                                | National Reference Center for Viruses of Respiratory Infections, Institut Pasteur, Paris                                | Marion Barbet, Sylvie Behillil, Méline Bizard, Angela Brisebarre, Camille Capel, Etienne Simon-Lorière, Vincent Enouf, Maud Vanpeene, Sylvie van der Werf,Talarmin Antoine                                                                                                                                                                                                                                                                                                                                                                                                                             |
| EPI_ISL_1013596, EPI_ISL_1013597, EPI_ISL_1013600, EPI_ISL_1013607, EPI_ISL_1013608, EPI_ISL_1013610                                                                                                                                         | Department for Molecular Diagnostics, Centre for Medical Microbiology, Institute of Public Health, Montenegro | Charité Universitätsmedizin Berlin, Institut für Virologie                                                              | Victor M Corman, Barbara Mühlemann, Jörn Beheim-Schwarzbach, Julia Tesch, Tobias Bleicker, Danijela Vujošević, Marija Govedarica, Talitha Veith, Julia Schneider, Terry Jones, Christian Drosten                                                                                                                                                                                                                                                                                                                                                                                                       |
| EPI_ISL_1015361                                                                                                                                                                                                                              | Coast Diagnostics                                                                                             | Synergy Laboratories                                                                                                    | Megan Cornwell                                                                                                                                                                                                                                                                                                                                                                                                                                                                                                                                                                                         |
| EPI_ISL_1015537                                                                                                                                                                                                                              | Azienda Sanitaria dell'Alto Adige Laboratorio Aziendale di Microbiologia e Virologia                          | Istituto di Genomica Applicata                                                                                          | Elisabetta Pagani, Irene Bianconi, Elisabetta Giacobazzi, Elisa Masi, Stefanie Wieser, Irena Jurman, Vera Vendramin, Gabriele Magris, Eleonora Paparelli, Davide Scaglione, Michele Morgante                                                                                                                                                                                                                                                                                                                                                                                                           |
| EPI_ISL_1016015, EPI_ISL_1016018                                                                                                                                                                                                             | NYU Langone Health                                                                                            | Departments of Pathology and Medicine, New York University School of Medicine                                           | Adriana Heguy, Dacia Dimartino, Emily Guzman, Christian Marier, Peter Meyn, Sitharam Ramaswami, Gael Westby, Paul Zappile, Yutong Zhang, Paolo Cotzia, Guiqing Wang                                                                                                                                                                                                                                                                                                                                                                                                                                    |
| EPI_ISL_1016169                                                                                                                                                                                                                              | TEMPUS LABS INC                                                                                               | Wadsworth Center, New York State Department of Health                                                                   | Kirsten St. George, Daryl M. Lamson, Alexis Russel, Matthew Shudt, Melissa A Leisner, Jonathan Plitnick, Navjot Singh, John Kelly, Erasmus Schneider, Erica Lasek-Nesselquist                                                                                                                                                                                                                                                                                                                                                                                                                          |
| EPI_ISL_1016175, EPI_ISL_1016205                                                                                                                                                                                                             | MONTEFIORE MEDICAL CENTER LABORATORIES                                                                        | Wadsworth Center, New York State Department of Health                                                                   | Kirsten St. George, Daryl M. Lamson, Alexis Russel, Matthew Shudt, Melissa A Leisner, Jonathan Plitnick, Navjot Singh, John Kelly, Erasmus Schneider, Erica Lasek-Nesselquist                                                                                                                                                                                                                                                                                                                                                                                                                          |
| EPI_ISL_1016250, EPI_ISL_1016252, EPI_ISL_1016253, EPI_ISL_1016255                                                                                                                                                                           | TEMPUS LABS INC                                                                                               | Wadsworth Center, New York State Department of Health                                                                   | Kirsten St. George, Daryl M. Lamson, Alexis Russel, Matthew Shudt, Melissa A Leisner, Jonathan Plitnick, Navjot Singh, John Kelly, Erasmus Schneider, Erica Lasek-Nesselquist                                                                                                                                                                                                                                                                                                                                                                                                                          |
| EPI_ISL_1016265, EPI_ISL_1016341                                                                                                                                                                                                             | New York Presbyterian Hospital                                                                                | Wadsworth Center, New York State Department of Health                                                                   | Kirsten St. George, Daryl M. Lamson, Alexis Russel, Matthew Shudt, Melissa A Leisner, Jonathan Plitnick, Navjot Singh, John Kelly, Erasmus Schneider, Erica Lasek-Nesselquist                                                                                                                                                                                                                                                                                                                                                                                                                          |
| EPI_ISL_1016755, EPI_ISL_1016764, EPI_ISL_1016779, EPI_ISL_1016790, EPI_ISL_1016802, EPI_ISL_1016812, EPI_ISL_1016830                                                                                                                        | Helix/Illumina                                                                                                | Respiratory Viruses Branch, Division of Viral Diseases, Centers for Disease Control and Prevention                      | Peter W. Cook, Dakota Howard, Dhvani Batra, Ben L. Rambo-Martin, Eileen de Feo, Jan Antico, Christine Tran, Matthew Tolentino, Shannon Wickline, Kim Gietzen, Brad Sickler, Jingtao Liu, Eric Allen, Phil Febbo, Summer Galloway, Nicole L. Washington, Simon White, Geraint Levan, Kelly Schiabor Barrett, Elizabeth Cirulli, Alexandre Bolze, Ary Ascencio, Charlotte Rivera-Garcia, Ryan Cho, Jason Nguyen, Sherry Wang, Jimmy Ramirez, Tyler Cassens, Efrén Sandoval, Magnus Isaksson, William Lee, David Becker, Marc Laurent, James Lu, Clinton R. Paden, Suxiang Tong, Duncan MacCannell        |
| EPI_ISL_1016857                                                                                                                                                                                                                              | Middlemore Hospital                                                                                           | Institute of Environmental Science and Research (ESR)                                                                   | Xiaoyun Ren, Matt Storey, Nikki Freed, Muhammad Faisal, Jing Wang, Hermes Perez, Anja Werno, Antje van der Linden, Arto Upton, Chris Mansell, David Hammer, Dragana Drinkovic, Gary McAuliffe, Hana Sofia Andersson, James Ussher, Jill Sherwood, Josh Freeman, Julia Howard, Juliet Ely, Mary DeAlmeida, Matt Blakiston, Matthew Rogers, Max Bloomfield, Michael Addidle, Michelle Balm, Sally Roberts, Sarah Jefferies, Sharmini Muttiyah, Susan Morpeth, Susan Taylor, Timothy Blackmore, Vani Sathyendran, Veronica Playle, Virginia Hope, Erasmus Smit, Lauren Jelly, Olin Silander, Joep de Ligt |
| EPI_ISL_1017698                                                                                                                                                                                                                              | Institute of Virology, Vaccines and Sera "Torlak"                                                             | Institute of microbiology and Immunology, Faculty of Medicine, University of Belgrade                                   | Knezevic,A., Jankovic,M., Vidanovic,D., Milicevic,O., Tesovic,B., Sekler,M., Jovanovic,T.                                                                                                                                                                                                                                                                                                                                                                                                                                                                                                              |
| EPI_ISL_1018008                                                                                                                                                                                                                              | DOHMH Morrisania                                                                                              | New York City Public Health Laboratory                                                                                  | Jade Wang, et al.                                                                                                                                                                                                                                                                                                                                                                                                                                                                                                                                                                                      |
| EPI_ISL_1018024                                                                                                                                                                                                                              | DOHMH Crown Heights                                                                                           | New York City Public Health Laboratory                                                                                  | Jade Wang, et al.                                                                                                                                                                                                                                                                                                                                                                                                                                                                                                                                                                                      |
| EPI_ISL_1018054, EPI_ISL_1018056, EPI_ISL_1018057                                                                                                                                                                                            | University Hospitals Translational Laboratory (UHTL), University Hospitals                                    | University Hospitals Translational Laboratory (UHTL), University Hospitals                                              | Sadri,N., Alouani.D. and Song.X.                                                                                                                                                                                                                                                                                                                                                                                                                                                                                                                                                                       |
| EPI_ISL_1018107, EPI_ISL_1018113                                                                                                                                                                                                             | General Hospital - Ohrid                                                                                      | Research Center for Genetic Engineering and Biotechnology "Georgi D. Efremov" , Macedonian Academy of Sciences and Arts | Aleksandar J. Dimovski, Dijana Plasheska-Karanfilska, Predrag Noveski, Gjorgji Bozinovski, Milena Jakimovska                                                                                                                                                                                                                                                                                                                                                                                                                                                                                           |
| EPI_ISL_1018224                                                                                                                                                                                                                              | Althaia. Xarxa Assistencial Universitària de Manresa                                                          | IrsiCaixa - Can Ruti CovidSeq                                                                                           | Marc Noguera-Julian, Mariona Parera, Maria Casadellà, Pilar Armengol, Francesc Catala-Moll, Roger Paredes, Bonaventura Clotet Gloria Trujillo, Rafel Perez Vidal, Jaume Trape Pujol, Carolina Gonzalez Fernandez, Roger Paredes, Eulalia Grau, Bonaventura Clotet                                                                                                                                                                                                                                                                                                                                      |
| EPI_ISL_1018336                                                                                                                                                                                                                              | Lighthouse Lab in Alderley Park                                                                               | Wellcome Sanger Institute for the COVID-19 Genomics UK (COG-UK) Consortium                                              | Jacquelyn Wynn, Mairead Hyland, The Lighthouse Lab in Alderley Park and Alex Alderton, Roberto Amato, Jeffrey Barrett, Sonia Goncalves, Ewan Harrison, David K. Jackson, Ian Johnston, Dominic Kwiatkowski, Cordelia Langford, John Sillitoe on behalf of the Wellcome Sanger Institute COVID-19 Surveillance Team                                                                                                                                                                                                                                                                                     |
| EPI_ISL_1019352                                                                                                                                                                                                                              | Lighthouse Lab in Cambridge                                                                                   | Wellcome Sanger Institute for the COVID-19 Genomics UK (COG-UK) Consortium                                              | Rob Howes, The Lighthouse Lab in Cambridge and Alex Alderton, Roberto Amato, Jeffrey Barrett, Sonia Goncalves, Ewan Harrison, David K. Jackson, Ian Johnston, Dominic Kwiatkowski, Cordelia Langford, John Sillitoe on behalf of the Wellcome Sanger Institute COVID-19 Surveillance Team                                                                                                                                                                                                                                                                                                              |
| EPI_ISL_1020356, EPI_ISL_1020366                                                                                                                                                                                                             | MEPHI, Aix Marseille University                                                                               | MEPHI, Aix Marseille University                                                                                         | Anthony LEVASSEUR                                                                                                                                                                                                                                                                                                                                                                                                                                                                                                                                                                                      |
| EPI_ISL_1020415, EPI_ISL_1020420, EPI_ISL_1020421, EPI_ISL_1020428, EPI_ISL_1020433, EPI_ISL_1020438, EPI_ISL_1020446, EPI_ISL_1020457, EPI_ISL_1020460, EPI_ISL_1020461, EPI_ISL_1020469, EPI_ISL_1020472                                   | see above                                                                                                     | Ministry of Health Turkey                                                                                               | Fatma Bayraktar, Yasemin Cogun, Süleyman Yalcin, Aye Baak Alta, Gülay Korukluolu                                                                                                                                                                                                                                                                                                                                                                                                                                                                                                                       |
| EPI_ISL_1020560, EPI_ISL_1020567                                                                                                                                                                                                             | Hospital Universitari Vall d'Hebron - Vall d'Hebron Institut de Recerca                                       | Hospital Universitari Vall d'Hebron - Vall d'Hebron Institut de Recerca                                                 | Cristina Andrés, Maria Piñana, Josep F Abril, Damir Garcia-Cehic, Ariadna Rando, Juliana Esperalba, Maria Gema Codina, Carla Castillo, Maria Carmen Martin, Tomás Pumarola, Josep Quer, Andrés Antón                                                                                                                                                                                                                                                                                                                                                                                                   |
| EPI_ISL_1024511                                                                                                                                                                                                                              | Department of Virus and Microbiological Special Diagnostics, Statens Serum Institut, Copenhagen, Denmark      | Aalborg University                                                                                                      | Danish Covid-19 Genome Consortium                                                                                                                                                                                                                                                                                                                                                                                                                                                                                                                                                                      |
| EPI_ISL_1027628                                                                                                                                                                                                                              | IRSESSEF GENOMICS LAB                                                                                         | IRSESSEF GENOMICS LAB                                                                                                   | Professor Souleymane MBOUP, Dr Abdul Karim Sesay, Abdoulie Kante, Dr Abdou PADANE,Dr Papa Alassane DIAW, Dr Biraahm Pierre NDIAYE, Dr Badara CISSE, Dr Aminata MBOUP, Dr Moustapha MBOW, Professor Ndéye Coumba Touré KANE                                                                                                                                                                                                                                                                                                                                                                             |
| EPI_ISL_1027645, EPI_ISL_1027646, EPI_ISL_1027649                                                                                                                                                                                            | Department of Microbiology, National Institute for Public Health of Kosova                                    | Charité Universitätsmedizin Berlin, Institut für Virologie                                                              | Victor M Corman, Julia Schneider, Donjeta Hajdari, Zana Deva, Xhevat Jakupi, Barbara Mühlemann, Jörn Beheim-Schwarzbach, Talitha Veith, Terry Jones, Christian Drosten                                                                                                                                                                                                                                                                                                                                                                                                                                 |
| EPI_ISL_1032913                                                                                                                                                                                                                              | Illinois Department of Public Health                                                                          | Gagnon Lab, Southern Illinois University                                                                                | Keith Gagnon                                                                                                                                                                                                                                                                                                                                                                                                                                                                                                                                                                                           |
| EPI_ISL_1033148                                                                                                                                                                                                                              | Microbiological Diagnostic Unit - Public Health Laboratory (MDU-PHL)                                          | MDU-PHL                                                                                                                 | Seemann T., Sait, M.L., Sherry, N.L.                                                                                                                                                                                                                                                                                                                                                                                                                                                                                                                                                                   |
| EPI_ISL_1033159                                                                                                                                                                                                                              | Laboratorio de Virología HUCA                                                                                 | Laboratorio de Virología HUCA                                                                                           | Sandoval M, Castelló C, Gómez de Oña J, Boga JA, Rojo S, Alvarez-Arguelles ME, Abreu F, Costales I, Perez-Martínez Z, Martín-Rodríguez G, Coto E, Melón S                                                                                                                                                                                                                                                                                                                                                                                                                                              |
| EPI_ISL_1033628, EPI_ISL_1033689, EPI_ISL_1033835, EPI_ISL_1034087                                                                                                                                                                           | Lighthouse Lab in Milton Keynes                                                                               | Wellcome Sanger Institute for the COVID-19 Genomics UK (COG-UK) Consortium                                              | The Lighthouse Lab in Milton Keynes and Alex Alderton, Roberto Amato, Jeffrey Barrett, Sonia Goncalves, Ewan Harrison, David K. Jackson, Ian Johnston, Dominic Kwiatkowski, Cordelia Langford, John Sillitoe on behalf of the Wellcome Sanger Institute COVID-19 Surveillance Team                                                                                                                                                                                                                                                                                                                     |
| EPI_ISL_1034154, EPI_ISL_1034161, EPI_ISL_1034162, EPI_ISL_1034165, EPI_ISL_1034166, EPI_ISL_1034170, EPI_ISL_1034171, EPI_ISL_1034173, EPI_ISL_1034181, EPI_ISL_1034183, EPI_ISL_1034185, EPI_ISL_1034186, EPI_ISL_1034188, EPI_ISL_1034189 | see above                                                                                                     | NIV Influenza                                                                                                           | Potdar V                                                                                                                                                                                                                                                                                                                                                                                                                                                                                                                                                                                               |
| EPI_ISL_1034211, EPI_ISL_1034228                                                                                                                                                                                                             | Laboratorio de Virología HUCA                                                                                 | Laboratorio de Virología HUCA                                                                                           | Sandoval M, Castelló C, Gómez de Oña J, Boga JA, Rojo S, Alvarez-Arguelles ME, Abreu F, Costales I, Perez-Martínez Z, Martín-Rodríguez G, Coto E, Melón S                                                                                                                                                                                                                                                                                                                                                                                                                                              |
| EPI_ISL_1034246, EPI_ISL_1034250                                                                                                                                                                                                             | Ministry of Health Turkey                                                                                     | Ministry of Health Turkey                                                                                               | Fatma Bayraktar, Yasemin Cogun, Süleyman Yalcin, Aye Baak Alta, Gülay Korukluolu                                                                                                                                                                                                                                                                                                                                                                                                                                                                                                                       |
| EPI_ISL_1035905, EPI_ISL_1035912, EPI_ISL_1035913                                                                                                                                                                                            | Hopital CH de Troyes                                                                                          | National Reference Center for Viruses of Respiratory Infections, Institut Pasteur, Paris                                | Marion Barbet, Sylvie Behillil, Méline Bizard, Angela Brisebarre, Camille Capel, Etienne Simon-Lorière, Vincent Enouf, Maud Vanpeene, Sylvie van der Werf,Stoessel-Thouvenin Patricia                                                                                                                                                                                                                                                                                                                                                                                                                  |
| EPI_ISL_1035928                                                                                                                                                                                                                              | hopital Laboratoire de Virologie du CHU de Lille                                                              | National Reference Center for Viruses of Respiratory                                                                    | Marion Barbet, Sylvie Behillil, Méline Bizard, Angela Brisebarre, Camille Capel, Etienne Simon-Lorière, Vincent Enouf, Maud Vanpeene, Sylvie van der                                                                                                                                                                                                                                                                                                                                                                                                                                                   |

|                                                                                                                                                                                                                                                                                                 |                                                                                                                                                                                         |                                                                                                                                                                                         |                                                                                                                                                                                                                                                                                                                                                                                                                                                                                                                                                                                                   |
|-------------------------------------------------------------------------------------------------------------------------------------------------------------------------------------------------------------------------------------------------------------------------------------------------|-----------------------------------------------------------------------------------------------------------------------------------------------------------------------------------------|-----------------------------------------------------------------------------------------------------------------------------------------------------------------------------------------|---------------------------------------------------------------------------------------------------------------------------------------------------------------------------------------------------------------------------------------------------------------------------------------------------------------------------------------------------------------------------------------------------------------------------------------------------------------------------------------------------------------------------------------------------------------------------------------------------|
| EPI_ISL_1036200, EPI_ISL_1036204                                                                                                                                                                                                                                                                | SIESP CH                                                                                                                                                                                | Infections, Institut Pasteur, Paris<br>Istituto Zooprofilattico Sperimentale dell'Abruzzo e Molise "G. Caporale"                                                                        | Werf,Guigon Aurélie<br>Lorusso A, Marcacci M, Di Domenico M, Ancora M, Curini V, Mangone I, Rinaldi A, Scialabba S, Di Pasquale A, Cammà C, Puglia I, Calistri P, Savini G                                                                                                                                                                                                                                                                                                                                                                                                                        |
| EPI_ISL_1036383                                                                                                                                                                                                                                                                                 | hopital Centre de Biologie humaine CHU Amiens                                                                                                                                           | National Reference Center for Viruses of Respiratory Infections, Institut Pasteur, Paris                                                                                                | Marion Barbet, Sylvie Behillil, Méline Bizard, Angela Brisebarre, Camille Capel, Etienne Simon-Lorière, Vincent Enouf, Maud Vanpeene, Sylvie van der Werf, Castelain Sandrine                                                                                                                                                                                                                                                                                                                                                                                                                     |
| EPI_ISL_1036408                                                                                                                                                                                                                                                                                 | hopital Hôpital Necker                                                                                                                                                                  | National Reference Center for Viruses of Respiratory Infections, Institut Pasteur, Paris                                                                                                | Marion Barbet, Sylvie Behillil, Méline Bizard, Angela Brisebarre, Camille Capel, Etienne Simon-Lorière, Vincent Enouf, Maud Vanpeene, Sylvie van der Werf, Lerulez-Ville Marianne                                                                                                                                                                                                                                                                                                                                                                                                                 |
| EPI_ISL_1036701, EPI_ISL_1036702, EPI_ISL_1036703, EPI_ISL_1036713, EPI_ISL_1036715, EPI_ISL_1036720, EPI_ISL_1036725                                                                                                                                                                           | Helix/Illumina                                                                                                                                                                          | Respiratory Viruses Branch, Division of Viral Diseases, Centers for Disease Control and Prevention                                                                                      | Peter W. Cook, Dakota Howard, Dhvani Batra, Ben L. Rambo-Martin, Eileen de Feo, Jan Antico, Christine Tran, Matthew Tolentino, Shannon Wickline, Kim Getzen, Brad SICKLER, Jingtao Liu, Eric Allen, Phil Febbo, Summer Galloway, Nicole L. Washington, Simon White, Geraint Levan, Kelly Schiabor Barrett, Elizabeth Cirulli, Alexandre Bolze, Ary Ascencio, Charlotte Rivera-Garcia, Ryan Cho, Jason Nguyen, Sherry Wang, Jimmy Ramirez, Tyler Cassens, Efrén Sandoval, Magnus Isaksson, William Lee, David Becker, Marc Laurent, James Lu, Clinton R. Paden, Suxiang Tong, Duncan MacCannell    |
| EPI_ISL_1038976                                                                                                                                                                                                                                                                                 | Tempus                                                                                                                                                                                  | Grubaugh Lab - Yale School of Public Health                                                                                                                                             | Joseph Fauver, Tara Alpert, Anderson Brito, Mallery Breban, Anne Wylie, Chantal Vogels, Mary Petrone, Annie Watkins, Chaney Kalinich, Isabel Ott, Nathan Grubaugh                                                                                                                                                                                                                                                                                                                                                                                                                                 |
| EPI_ISL_1038982, EPI_ISL_1038983, EPI_ISL_1038984, EPI_ISL_1038985, EPI_ISL_1038987, EPI_ISL_1038988, EPI_ISL_1038989                                                                                                                                                                           | Yale Clinical Virology Lab                                                                                                                                                              | Grubaugh Lab - Yale School of Public Health                                                                                                                                             | Joseph Fauver, Tara Alpert, Anderson Brito, Mallery Breban, Anne Wylie, Chantal Vogels, Mary Petrone, Annie Watkins, Chaney Kalinich, Isabel Ott, Nathan Grubaugh                                                                                                                                                                                                                                                                                                                                                                                                                                 |
| EPI_ISL_1038994                                                                                                                                                                                                                                                                                 | Murphy Medical Associates                                                                                                                                                               | Grubaugh Lab - Yale School of Public Health                                                                                                                                             | Joseph Fauver, Tara Alpert, Anderson Brito, Mallery Breban, Anne Wylie, Chantal Vogels, Mary Petrone, Annie Watkins, Chaney Kalinich, Isabel Ott, Nathan Grubaugh                                                                                                                                                                                                                                                                                                                                                                                                                                 |
| EPI_ISL_1038999                                                                                                                                                                                                                                                                                 | Yale Pathology Lab                                                                                                                                                                      | Grubaugh Lab - Yale School of Public Health                                                                                                                                             | Joseph Fauver, Tara Alpert, Anderson Brito, Mallery Breban, Anne Wylie, Chantal Vogels, Mary Petrone, Annie Watkins, Chaney Kalinich, Isabel Ott, Nathan Grubaugh                                                                                                                                                                                                                                                                                                                                                                                                                                 |
| EPI_ISL_1039160                                                                                                                                                                                                                                                                                 | Department of Laboratory Medicine, National Taiwan University Hospital                                                                                                                  | Microbial Genomics Core Lab, National Taiwan University Centers of Genomic and Precision Medicine                                                                                       | Shiou-Hwei Yeh, You-Yu Lin, Ya-Yun Lai, Chiao-Ling Li, Shan-Chwen Chang, Pei-Jer Chen, Sui-Yuan Chang                                                                                                                                                                                                                                                                                                                                                                                                                                                                                             |
| EPI_ISL_1039228                                                                                                                                                                                                                                                                                 | KEMRI-Wellcome Trust Research Programme/KEMRI-CGMR-C Kilifi                                                                                                                             | KEMRI-Wellcome Trust Research Programme/KEMRI-CGMR-C Kilifi                                                                                                                             | Githinji et al                                                                                                                                                                                                                                                                                                                                                                                                                                                                                                                                                                                    |
| EPI_ISL_1040226, EPI_ISL_1040293, EPI_ISL_1040311                                                                                                                                                                                                                                               | University Hospitals of Geneva, Laboratory of Virology                                                                                                                                  | HUG, Laboratory of Virology and the Health2030 Genome Center                                                                                                                            | Samuel Cordey, Ana Rita Goncalves, Laurent Kaiser, Lorenzo Cerutti, Henri Pegeot, Melyssa Elies, Deborah Penet, Keith Harshman, Ioannis Xenarios, Emmanouil Dermitzakis                                                                                                                                                                                                                                                                                                                                                                                                                           |
| EPI_ISL_1040492                                                                                                                                                                                                                                                                                 | University of Liège COVID-19 testing center                                                                                                                                             | GIGA Medical Genomics                                                                                                                                                                   | Keith Durkin, Maria Artesi, Bouchra Boujemla, Nathalie Renotte, Cécile Meex, Sébastien Bontems, Fabrice Bureau, Laurent Gillet, Wouter Coppieters, Marie-Pierre Hayette, Vincent Bours                                                                                                                                                                                                                                                                                                                                                                                                            |
| EPI_ISL_1040936                                                                                                                                                                                                                                                                                 | Medical Laboratory Bruss                                                                                                                                                                | Laboratory of Recombinant Vaccines                                                                                                                                                      | Lukasz Rabalski, Maciej Kosinski, Maciej Grzybek, Pawel Pisarek, Boguslaw Szewczyk, Krystyna Bienkowska-Szewczyk                                                                                                                                                                                                                                                                                                                                                                                                                                                                                  |
| EPI_ISL_1040939, EPI_ISL_1040966, EPI_ISL_1040974                                                                                                                                                                                                                                               | Hematology Laboratory, Section of Molecular Diagnostics, University Clinical Centre, Medical University of Gdansk                                                                       | Laboratory of Recombinant Vaccines                                                                                                                                                      | Lukasz Rabalski, Maciej Kosinski, Adam Sodol, Aneta Szulc, Krzysztof Lewandowski, Ewa Milosz, Marlena Robakowska, Boguslaw Szewczyk, Krystyna Bienkowska-Szewczyk                                                                                                                                                                                                                                                                                                                                                                                                                                 |
| EPI_ISL_1040990, EPI_ISL_1041009                                                                                                                                                                                                                                                                | Medical Laboratory Bruss                                                                                                                                                                | Laboratory of Recombinant Vaccines                                                                                                                                                      | Lukasz Rabalski, Maciej Kosinski, Maciej Grzybek, Pawel Pisarek, Boguslaw Szewczyk, Krystyna Bienkowska-Szewczyk                                                                                                                                                                                                                                                                                                                                                                                                                                                                                  |
| EPI_ISL_1041203, EPI_ISL_1041204, EPI_ISL_1041205, EPI_ISL_1041206                                                                                                                                                                                                                              | Hungarian Defence Forces Military Medical Centre                                                                                                                                        | National Laboratory of Virology, Szentgáthai Research Centre                                                                                                                            | Endre Gábor Tóth, Balázs Somogyi, Ágnes Balázs-Nagy, Csaba Pereszlenyi, Ferenc Jakab, Gábor Kemenei                                                                                                                                                                                                                                                                                                                                                                                                                                                                                               |
| EPI_ISL_1041365, EPI_ISL_1041402, EPI_ISL_1041408, EPI_ISL_1041485, EPI_ISL_1041501, EPI_ISL_1041541, EPI_ISL_1041593, EPI_ISL_1041602, EPI_ISL_1041618, EPI_ISL_1041628, EPI_ISL_1041629, EPI_ISL_1041638, EPI_ISL_1041717, EPI_ISL_1041766, EPI_ISL_1041845, EPI_ISL_1041864, EPI_ISL_1041870 | see above                                                                                                                                                                               | Pandemic Response Lab, R&D                                                                                                                                                              | Henry Lee, Michael Hammerling, Melissa Hopkins, Cybill del Castillo, William Ward, Pradeep Bugga, Haiping Hao, Jon Laurent                                                                                                                                                                                                                                                                                                                                                                                                                                                                        |
| EPI_ISL_1041958                                                                                                                                                                                                                                                                                 | Department of Laboratory Medicine, National Taiwan University Hospital                                                                                                                  | Microbial Genomics Core Lab, National Taiwan University Centers of Genomic and Precision Medicine                                                                                       | Shiou-Hwei Yeh, You-Yu Lin, Ya-Yun Lai, Chiao-Ling Li, Shan-Chwen Chang, Pei-Jer Chen, Sui-Yuan Chang                                                                                                                                                                                                                                                                                                                                                                                                                                                                                             |
| EPI_ISL_1042906, EPI_ISL_1043094                                                                                                                                                                                                                                                                | Lighthouse Lab in Alderley Park                                                                                                                                                         | Wellcome Sanger Institute for the COVID-19 Genomics UK (COG-UK) Consortium                                                                                                              | Jacquelyn Wynn, Mairead Hyland, The Lighthouse Lab in Alderley Park and Alex Alderton, Roberto Amato, Jeffrey Barrett, Sonia Goncalves, Ewan Harrison, David K. Jackson, Ian Johnston, Dominic Kwiatkowski, Cordelia Langford, John Sillitoe on behalf of the Wellcome Sanger Institute COVID-19 Surveillance Team                                                                                                                                                                                                                                                                                |
| EPI_ISL_1043237                                                                                                                                                                                                                                                                                 | Lighthouse Lab in Milton Keynes                                                                                                                                                         | Wellcome Sanger Institute for the COVID-19 Genomics UK (COG-UK) Consortium                                                                                                              | The Lighthouse Lab in Milton Keynes and Alex Alderton, Roberto Amato, Jeffrey Barrett, Sonia Goncalves, Ewan Harrison, David K. Jackson, Ian Johnston, Dominic Kwiatkowski, Cordelia Langford, John Sillitoe on behalf of the Wellcome Sanger Institute COVID-19 Surveillance Team                                                                                                                                                                                                                                                                                                                |
| EPI_ISL_1043507                                                                                                                                                                                                                                                                                 | Randox Laboratories                                                                                                                                                                     | Wellcome Sanger Institute for the COVID-19 Genomics UK (COG-UK) Consortium                                                                                                              | Randox Laboratories and Alex Alderton, Roberto Amato, Jeffrey Barrett, Sonia Goncalves, Ewan Harrison, David K. Jackson, Ian Johnston, Dominic Kwiatkowski, Cordelia Langford, John Sillitoe on behalf of the Wellcome Sanger Institute COVID-19 Surveillance Team                                                                                                                                                                                                                                                                                                                                |
| EPI_ISL_1044120, EPI_ISL_1044171, EPI_ISL_1044583, EPI_ISL_1044674, EPI_ISL_1045107                                                                                                                                                                                                             | Lighthouse Lab in Alderley Park                                                                                                                                                         | Wellcome Sanger Institute for the COVID-19 Genomics UK (COG-UK) Consortium                                                                                                              | Jacquelyn Wynn, Mairead Hyland, The Lighthouse Lab in Alderley Park and Alex Alderton, Roberto Amato, Jeffrey Barrett, Sonia Goncalves, Ewan Harrison, David K. Jackson, Ian Johnston, Dominic Kwiatkowski, Cordelia Langford, John Sillitoe on behalf of the Wellcome Sanger Institute COVID-19 Surveillance Team                                                                                                                                                                                                                                                                                |
| EPI_ISL_1045964                                                                                                                                                                                                                                                                                 | Lighthouse Lab in Milton Keynes                                                                                                                                                         | Wellcome Sanger Institute for the COVID-19 Genomics UK (COG-UK) Consortium                                                                                                              | The Lighthouse Lab in Milton Keynes and Alex Alderton, Roberto Amato, Jeffrey Barrett, Sonia Goncalves, Ewan Harrison, David K. Jackson, Ian Johnston, Dominic Kwiatkowski, Cordelia Langford, John Sillitoe on behalf of the Wellcome Sanger Institute COVID-19 Surveillance Team                                                                                                                                                                                                                                                                                                                |
| EPI_ISL_1046101, EPI_ISL_1046235, EPI_ISL_1046390, EPI_ISL_1046402, EPI_ISL_1046656, EPI_ISL_1046759                                                                                                                                                                                            | Randox Laboratories                                                                                                                                                                     | Wellcome Sanger Institute for the COVID-19 Genomics UK (COG-UK) Consortium                                                                                                              | Randox Laboratories and Alex Alderton, Roberto Amato, Jeffrey Barrett, Sonia Goncalves, Ewan Harrison, David K. Jackson, Ian Johnston, Dominic Kwiatkowski, Cordelia Langford, John Sillitoe on behalf of the Wellcome Sanger Institute COVID-19 Surveillance Team                                                                                                                                                                                                                                                                                                                                |
| EPI_ISL_1046761                                                                                                                                                                                                                                                                                 | SARS-CoV-2 testing team, National Institute of Infectious Diseases                                                                                                                      | Pathogen Genomics Center, National Institute of Infectious Diseases                                                                                                                     | Tsuyoshi Sekizuka, Kentaro Itokawa, Rina Tanaka, Masanori Hashino, Minoru Nagi, Ken Miyazawa, Takashi Sakudoh, Nozomu Hanaoka, Tsugoto Fujimoto, Makoto Kuroda                                                                                                                                                                                                                                                                                                                                                                                                                                    |
| EPI_ISL_1046765                                                                                                                                                                                                                                                                                 | SARS-CoV-2 testing team, National Institute of Infectious Diseases                                                                                                                      | Pathogen Genomics Center, National Institute of Infectious Diseases                                                                                                                     | Tsuyoshi Sekizuka, Kentaro Itokawa, Rina Tanaka, Masanori Hashino, Koichi Ishikawa, Midori Nakamura-Hoshi, Shigeru Kusagawa, Makoto Kuroda                                                                                                                                                                                                                                                                                                                                                                                                                                                        |
| EPI_ISL_1047087, EPI_ISL_1047181, EPI_ISL_1047378, EPI_ISL_1047512                                                                                                                                                                                                                              | Department of Pathology, University of Cambridge                                                                                                                                        | COVID-19 Genomics UK (COG-UK) Consortium                                                                                                                                                | Aminu S. Jahun, Yasmin Chaudhry, Iliana Georgana, Myra Hosmillo, Rhys Izuagbe, William L. Hamilton, Martin D. Curran, Surendra Parmar, Ian Goodfellow                                                                                                                                                                                                                                                                                                                                                                                                                                             |
| EPI_ISL_1048367                                                                                                                                                                                                                                                                                 | Department for Virology, Molecular Biology and Genome Research, R. G. Lugar Center for Public Health Research, National Center for Disease Control and Public Health (NCDC) of Georgia. | Department for Virology, Molecular Biology and Genome Research, R. G. Lugar Center for Public Health Research, National Center for Disease Control and Public Health (NCDC) of Georgia. | Gvantsa Brachvili, Meri Pantsulaia, Giorgi Gogoladze, Giorgi Tomashvili, Nino Berishvili, Tata Imnadze, Ana Papkauri, Gvantsa Chanturia, Ann Machabishvili, Nato Kotaria, Marine Murtskhvaladze, Lela Sabadze, Mari Gavashelidze, Tamar Jashashvili, Tea Tvedoradze, Ketevan Sidamonidze, Ekaterine Khmaladze, Ekaterine Zhgenti, Roena Sukhishvili, Mariam Zakalashvili, Lela Urushadze, Magda Dgebadze, Davit Tsaguria, Ekaterine Zangaladze, Adam Kotorashvili, Maia Alkhashvili, Irma Burjanadze, Anna Kasradze, Khatuna Zakhshvili, Paata Imnadze, Amiran Gamkrelidze.                       |
| EPI_ISL_1048371                                                                                                                                                                                                                                                                                 | Megalab, Molecular and Cytogenetics Diagnostics                                                                                                                                         | Department for Virology, Molecular Biology and Genome Research, R. G. Lugar Center for Public Health Research, National Center for Disease Control and Public Health (NCDC) of Georgia. | Giorgi Tomashvili, Gvantsa Brachvili, Meri Pantsulaia, Giorgi Gogoladze, Nino Berishvili, Tata Imnadze, Ana Papkauri, Gvantsa Chanturia, Ann Machabishvili, Nato Kotaria, Marine Murtskhvaladze, Lela Sabadze, Mari Gavashelidze, Tamar Jashashvili, Tea Tvedoradze, Ketevan Sidamonidze, Ekaterine Khmaladze, Ekaterine Zhgenti, Roena Sukhishvili, Mariam Zakalashvili, Lela Urushadze, Magda Dgebadze, Davit Tsaguria, Ekaterine Zangaladze, Adam Kotorashvili, Maia Alkhashvili, Irma Burjanadze, Anna Kasradze, Khatuna Zakhshvili, Paata Imnadze, Amiran Gamkrelidze. Submitter information |
| EPI_ISL_1048408, EPI_ISL_1048410, EPI_ISL_1048419, EPI_ISL_1048424, EPI_ISL_1048426, EPI_ISL_1048428                                                                                                                                                                                            | Wojewódzka Stacja Sanitarno-Epidemiologiczna w Olsztynie, Laboratorium Bada Epidemiologiczno-Klinicznych                                                                                | Wojewódzka Stacja Sanitarno-Epidemiologiczna w Olsztynie, Laboratorium Bada Epidemiologiczno-Klinicznych                                                                                | Sylvia Krztowska, Monika Czermiska, Barbara Doliska, Ewa Liszewska, Tomasz Jakubczak, Marta ukian, Patryk Bielecki, Aleksandra Kobiatko, Emilia Tarabas, Paulina Róycka, Beata Wasiek                                                                                                                                                                                                                                                                                                                                                                                                             |

|                                                                                                                                        |                                                                                                                                  |                                                                                                                                   |                                                                                                                                                                                                                                                                                                                                                                                                                                                                                                                                                                                                                                                                                                                                                              |
|----------------------------------------------------------------------------------------------------------------------------------------|----------------------------------------------------------------------------------------------------------------------------------|-----------------------------------------------------------------------------------------------------------------------------------|--------------------------------------------------------------------------------------------------------------------------------------------------------------------------------------------------------------------------------------------------------------------------------------------------------------------------------------------------------------------------------------------------------------------------------------------------------------------------------------------------------------------------------------------------------------------------------------------------------------------------------------------------------------------------------------------------------------------------------------------------------------|
| EPI_ISL_1048806, EPI_ISL_1048808                                                                                                       | Laboratory of Clinical Microbiology, Virology and Bioemergencies - Fatebenefratelli Sacco Hospital                               | Virology Laboratory, Scientific Department, Army Medical Center                                                                   | Valeria Micheli, Alessandro Mancon, Alberto Rizzo, Maria Rita Gismondo, Silvia Fillo, Anella Monte, Anna Anselmo, Vanessa Vera Fain, Giovanni Faggioli, Riccardo De Sanctis, Florio Lista                                                                                                                                                                                                                                                                                                                                                                                                                                                                                                                                                                    |
| EPI_ISL_1048898, EPI_ISL_1048908, EPI_ISL_1049003                                                                                      | KU Leuven, Rega Institute, Clinical and Epidemiological Virology                                                                 | KU Leuven, Rega Institute, Clinical and Epidemiological Virology                                                                  | Tony Wawina-Bokalanga, Bert Vanmechelen, Joan Marti-Carerras, Piet Maes                                                                                                                                                                                                                                                                                                                                                                                                                                                                                                                                                                                                                                                                                      |
| EPI_ISL_1049204, EPI_ISL_1049205, EPI_ISL_1049209, EPI_ISL_1049212, EPI_ISL_1049213, EPI_ISL_1049214, EPI_ISL_1049217, EPI_ISL_1049218 | PA Department of Health, Bureau of Laboratories                                                                                  | Pathogen Discovery, Respiratory Viruses Branch, Division of Viral Diseases, Centers for Disease Control and Prevention            | Ying Tao, Jing Zhang, Yan Li, Brian Lynch, Krista Queen, Anna Uehara, Peter Cook, Han Jia Ng, Clinton R. Paden, Haibin Wang, Suxiang Tong                                                                                                                                                                                                                                                                                                                                                                                                                                                                                                                                                                                                                    |
| EPI_ISL_1049482                                                                                                                        | MSHS Clinical Microbiology Laboratories                                                                                          | MSHS Pathogen Surveillance Program                                                                                                | Ana S. Gonzalez-Reiche, Hala Alshammery, Mitchell J. Sullivan, Brianne Ciferri, Ajay Obla, Angela Amoako, Mahmoud Awawda, Daniel Floda, Julia Matthews, Ashley Salimbangon, Levy Sominsky, Katherine Beach, Kayla Russo, Charles Gleason, Shelcie Fabre, Giulio Kleiner, Zenab Khan, Bremy Albuquerque, Adriana van de Guchte, Komal Srivastava, Matthew M. Hernandez, Jayeeta Dutta, Denise Jurczynzak, Nancy Francoeur, Betsaida Salom Melo, Irina Oussenko, Gintaras Deikus, Juan Soto, Shwetha Hara Sridhar, Ying-Chih Wang, Kathryn Twyman, Deena R. Altman, Robert Sebra, Adolfo Garcia-Sastre, Marta Luksza, Gopi Patel, Sarah Schaefer, Melissa Gitman, Michael D. Nowak, Alberto Paniz-Mondolfi, Emilia Mia Sordillo, Viviana Simon, Harm van Bakel |
| EPI_ISL_1049483, EPI_ISL_1049484                                                                                                       | Alaska State Virology Laboratory                                                                                                 | Alaska State Virology Laboratory                                                                                                  | Stephanie DeRonde, Lisa Smith, Ph.D., Jack Chen, Ph.D.                                                                                                                                                                                                                                                                                                                                                                                                                                                                                                                                                                                                                                                                                                       |
| EPI_ISL_1050506, EPI_ISL_1050678                                                                                                       | University College London, Great Ormond Street Hospital for Children NHS Foundation Trust, Imperial College Healthcare NHS Trust | COVID-19 Genomics UK (COG-UK) Consortium                                                                                          | Sergi Castellano, Rachel Williams, Mark Kristiansen, Paola Resende Silva, Sunando Roy, Tony Brooks, Helena Tutill, Paola Niola, Patricia Dyal, Charlotte Williams, Leysa Forrest, Yasmin Panchbhaya, Jacqueline Findlay, Samuel Weeks, Julianne Brown, Kathryn Harris, Paul Randell, James Price, Alison Holmes, Judith Breuer                                                                                                                                                                                                                                                                                                                                                                                                                               |
| EPI_ISL_1050703                                                                                                                        | Arizona State University                                                                                                         | Arizona State University                                                                                                          | Peter T. Skidmore, LaRinda A. Holland, Emily A. Kaelin, Nicholas J. Mellor, Kristina Buss, Joy M. Blain, Neal W Woodbury, Valerie Harris, Joshua LaBaer, Vel Murugan, Efrim S. Lim                                                                                                                                                                                                                                                                                                                                                                                                                                                                                                                                                                           |
| EPI_ISL_1052206, EPI_ISL_1052832, EPI_ISL_1053358                                                                                      | Originating lab: Wales Specialist Virology Centre Sequencing lab: Pathogen Genomics Unit                                         | Public Health Wales Microbiology Cardiff Wales Specialist Virology Centre                                                         | Catherine Moore, Johnathan Evans, Laura Gifford, Malorie Perry, Simon Cottrell, Angela Marchbank, Alec Birchley, Alexander Adams, Amy Gaskin, Bree Gatica-Wilcox, Jason Coombes, Joel Southgate, Lauren Gilbert, Lee Graham, Nicole Pacchiarni, Sara Kuzmiene-Summerhayes, Sarah Taylor, Sophie Jones, Sara Rey, Matthew Bull, Joanne Watkins, Sally Corden, Tom Connor                                                                                                                                                                                                                                                                                                                                                                                      |
| EPI_ISL_1053974, EPI_ISL_1054617                                                                                                       | Centre for Enzyme Innovation, University of Portsmouth / Translational Research Laboratory, Portsmouth Hospitals NHS Trust       | COVID-19 Genomics UK (COG-UK) Consortium                                                                                          | Angela Beckett, Salman Goudarzi, Christopher Fearn, Kate Cook, Katie Loveson, Sharon Glaysher, Scott Elliott, Samuel Robson                                                                                                                                                                                                                                                                                                                                                                                                                                                                                                                                                                                                                                  |
| EPI_ISL_1055378                                                                                                                        | Oregon State Public Health Laboratory                                                                                            | Oregon SARS-CoV-2 Genome Sequencing Center                                                                                        | Brendan L. O'Connell, Sally Grindstaff, Kayla Carter, Sonia Acharya, John Fontana, LaDonna Grenz, Ruth V. Nichols, Alec J. Hirsch, Donna Hansel, Guang Fan, Xuan Qin, Daniel N. Streblow, William B. Messer, Andrew C. Adey, Benjamin N. Bimber, Brian J. O'Roak                                                                                                                                                                                                                                                                                                                                                                                                                                                                                             |
| EPI_ISL_1055755                                                                                                                        | Microbiology Department. Complejo Hospitalario Universitario de Santiago                                                         | Microbiology Department. Complejo Hospitalario Universitario de Vigo                                                              | Microbiology Department, Complejo Hospitalario Universitario de Vigo (CHUVI). Complejo Hospitalario Universitario de Santiago (CHUS).                                                                                                                                                                                                                                                                                                                                                                                                                                                                                                                                                                                                                        |
| EPI_ISL_1055817                                                                                                                        | SIESP DIPARTIMENTO DI PREVENZIONE CHIETI                                                                                         | Istituto Zooprofilattico Sperimentale dell'Abruzzo e Molise "G. Caporale"                                                         | Lorusso A, Marcacci M, Di Domenico M, Ancora M, Curini V, Mangone I, Rinaldi A, Delli Compagni E, Scialabba S, Di Pasquale A, Cammà C, Puglia I, Calistri P, Savini G                                                                                                                                                                                                                                                                                                                                                                                                                                                                                                                                                                                        |
| EPI_ISL_1056470                                                                                                                        | National Laboratory for Health, Environment and Food                                                                             | CISLD (Clinical Institute of Special Laboratory Diagnostics), University Children's Hospital, University Medical Center Ljubljana | Jernej Kova, Barbara Jenko Bizjan, Tine Tesovnik, Robert Šket, Katarina Kozmos, Ana Grom, Maruša Debeljak, Marko Pokorn, Tadej Battelino                                                                                                                                                                                                                                                                                                                                                                                                                                                                                                                                                                                                                     |
| EPI_ISL_1058488                                                                                                                        | SYNLAB - Laboratoire J. Collard                                                                                                  | GIGA Medical Genomics                                                                                                             | Keith Durkin, Maria Artesi, Sébastien Bontems, Raphaël Boreux, Bouchra Boujemla, Nathalie Renotte, Cécile Meex, Pierrette Melin, Marie-Pierre Hayette, Vincent Bours                                                                                                                                                                                                                                                                                                                                                                                                                                                                                                                                                                                         |
| EPI_ISL_1058672                                                                                                                        | University of Liège COVID-19 testing center                                                                                      | GIGA Medical Genomics                                                                                                             | Keith Durkin, Maria Artesi, Bouchra Boujemla, Nathalie Renotte, Cécile Meex, Sébastien Bontems, Fabrice Bureau, Laurent Gillet, Wouter Coppeters, Marie-Pierre Hayette, Vincent Bours                                                                                                                                                                                                                                                                                                                                                                                                                                                                                                                                                                        |
| EPI_ISL_1058777, EPI_ISL_1058832                                                                                                       | Michigan Department of Health and Human Services, Bureau of Laboratories                                                         | Michigan Department of Health and Human Services, Bureau of Laboratories                                                          | Blankenship HM, Riner D, Soehlnen MK                                                                                                                                                                                                                                                                                                                                                                                                                                                                                                                                                                                                                                                                                                                         |
| EPI_ISL_1059358                                                                                                                        | Viollier AG                                                                                                                      | Department of Biosystems Science and Engineering, ETH Zürich                                                                      | Chaoran Chen, Sarah Nadeau, Ivan Topolsky, Emmanouil Dermatzakis, Keith Harshman, Ioannis Xenarios, Henri Pegeot, Lorenzo Cerutti, Deborah Penet, Philipp Jablonski, Lara Fuhrmann, David Dreifuss, Katharina Jahn, Christiane Beckmann, Maurice Redondo, Olivier Kobel, Christoph Noppen, Sophie Seidel, Noemie Santamaria de Souza, Niko Beerenwinkel, Tanja Stadler                                                                                                                                                                                                                                                                                                                                                                                       |
| EPI_ISL_1059955                                                                                                                        | HOSPITAL COMARCAL DE MELILLA                                                                                                     | Instituto de Salud Carlos III                                                                                                     | Iglesias-Caballero, M. Sandonis, V. Vázquez-Morón, S. Camarero, S. Pozo, F. Casas, I. Jiménez, P. Zaballos, A. Monzón, S. Varona, S. Cuesta, I. Román, S.                                                                                                                                                                                                                                                                                                                                                                                                                                                                                                                                                                                                    |
| EPI_ISL_1059978                                                                                                                        | HOSPITAL UNIV. MIGUEL SERVET                                                                                                     | Instituto de Salud Carlos III                                                                                                     | Iglesias-Caballero, M. Sandonis, V. Vázquez-Morón, S. Camarero, S. Pozo, F. Casas, I. Jiménez, P. Zaballos, A. Monzón, S. Varona, S. Cuesta, I. Milagro, A. M.                                                                                                                                                                                                                                                                                                                                                                                                                                                                                                                                                                                               |
| EPI_ISL_1060375                                                                                                                        | Labo Analyses Med                                                                                                                | National Reference Center for Viruses of Respiratory Infections, Institut Pasteur, Paris                                          | Marion Barbet, Sylvie Behillil, Méline Bizard, Angela Brisebarre, Camille Capel, Etienne Simon-Lorière, Vincent Enouf, Maud Vanpeene, Sylvie van der Werf, Fiorina Jc                                                                                                                                                                                                                                                                                                                                                                                                                                                                                                                                                                                        |
| EPI_ISL_1060380                                                                                                                        | Hopital                                                                                                                          | National Reference Center for Viruses of Respiratory Infections, Institut Pasteur, Paris                                          | Marion Barbet, Sylvie Behillil, Méline Bizard, Angela Brisebarre, Camille Capel, Etienne Simon-Lorière, Vincent Enouf, Maud Vanpeene, Sylvie van der Werf, Guinoiseau Thibault                                                                                                                                                                                                                                                                                                                                                                                                                                                                                                                                                                               |
| EPI_ISL_1060496, EPI_ISL_1060498, EPI_ISL_1060509, EPI_ISL_1060511, EPI_ISL_1060513                                                    | Servicio de Microbiología. Hospital Clínico Universitario de Valencia                                                            | SeqCOVID-SPAIN consortium/IBV(CSIC)                                                                                               | David Navarro Ortega, Eliseo Albert Vicent, Ignacio Torres and SeqCOVID-SPAIN consortium                                                                                                                                                                                                                                                                                                                                                                                                                                                                                                                                                                                                                                                                     |
| EPI_ISL_1060791, EPI_ISL_1060794                                                                                                       | Virtua Health System-Voorhees                                                                                                    | New Jersey Public Health Environmental Laboratories (NJ_PHEL)                                                                     | Lindsey Bodnar, Shiv Verma, Dana Woell, Byeong Jeong                                                                                                                                                                                                                                                                                                                                                                                                                                                                                                                                                                                                                                                                                                         |
| EPI_ISL_1061094, EPI_ISL_1061098, EPI_ISL_1061124, EPI_ISL_1061127, EPI_ISL_1061150, EPI_ISL_1061152                                   | Istituto Zooprofilattico Sperimentale del Mezzogiorno (IZSM)                                                                     | Telethon Institute of Genetics and Medicine (TIGEM)                                                                               | Antonio Grimaldi, Patrizia Annunziata, Francesco Panariello, Biancamaria Pierri, Valentina Bouche, Chiara Colantuono, Maria Concetta Cuomo, Denise Di Concilio, Lucio Di Filippo, Anna Manfredi, Marcello Salvi, Antonio Limone, Pellegrino Cerino, Andrea Ballabio, Davide Cacchiarelli.                                                                                                                                                                                                                                                                                                                                                                                                                                                                    |
| EPI_ISL_1061610                                                                                                                        | Lighthouse Lab in Cambridge                                                                                                      | Wellcome Sanger Institute for the COVID-19 Genomics UK (COG-UK) Consortium                                                        | Rob Howes, The Lighthouse Lab in Cambridge and Alex Alderton, Roberto Amato, Jeffrey Barrett, Sonia Goncalves, Ewan Harrison, David K. Jackson, Ian Johnston, Dominic Kwiatkowski, Cordelia Langford, John Sillitoe on behalf of the Wellcome Sanger Institute COVID-19 Surveillance Team                                                                                                                                                                                                                                                                                                                                                                                                                                                                    |
| EPI_ISL_1061773, EPI_ISL_1061857, EPI_ISL_1061933                                                                                      | Lighthouse Lab in Alderley Park                                                                                                  | Wellcome Sanger Institute for the COVID-19 Genomics UK (COG-UK) Consortium                                                        | Jacquelyn Wynn, Mairead Hyland, The Lighthouse Lab in Alderley Park and Alex Alderton, Roberto Amato, Jeffrey Barrett, Sonia Goncalves, Ewan Harrison, David K. Jackson, Ian Johnston, Dominic Kwiatkowski, Cordelia Langford, John Sillitoe on behalf of the Wellcome Sanger Institute COVID-19 Surveillance Team                                                                                                                                                                                                                                                                                                                                                                                                                                           |
| EPI_ISL_1062106, EPI_ISL_1062115, EPI_ISL_1062805                                                                                      | Lighthouse Lab in Milton Keynes                                                                                                  | Wellcome Sanger Institute for the COVID-19 Genomics UK (COG-UK) Consortium                                                        | The Lighthouse Lab in Milton Keynes and Alex Alderton, Roberto Amato, Jeffrey Barrett, Sonia Goncalves, Ewan Harrison, David K. Jackson, Ian Johnston, Dominic Kwiatkowski, Cordelia Langford, John Sillitoe on behalf of the Wellcome Sanger Institute COVID-19 Surveillance Team                                                                                                                                                                                                                                                                                                                                                                                                                                                                           |
| EPI_ISL_1063406, EPI_ISL_1063411, EPI_ISL_1063439, EPI_ISL_1063449, EPI_ISL_1063459, EPI_ISL_1063467                                   | Azienda Sanitaria dell'Alto Adige Laboratorio Aziendale di Microbiologia e Virologia                                             | Istituto di Genomica Applicata                                                                                                    | Elisabetta Pagani, Irene Bianconi, Elisabetta Giacobazzi, Elisa Masi, Stefanie Wieser, Irena Jurman, Vera Vendramin, Gabriele Magris, Eleonora Paparelli, Davide Scaglione, Michele Morgante                                                                                                                                                                                                                                                                                                                                                                                                                                                                                                                                                                 |
| EPI_ISL_1063915                                                                                                                        | Rwanda National Reference Laboratory                                                                                             | Rwanda National Reference Laboratory                                                                                              | Enatha Mukantwari, Umuranga Jeanne d'Arc                                                                                                                                                                                                                                                                                                                                                                                                                                                                                                                                                                                                                                                                                                                     |
| EPI_ISL_1063916, EPI_ISL_1063921, EPI_ISL_1063922, EPI_ISL_1063925,                                                                    | Ministry of Health Turkey                                                                                                        | Ministry of Health Turkey                                                                                                         | Fatma Bayraktar, Yasemin Cogun, Süleyman Yalcin, Aye Baak Alta, Gülay Korukluolu                                                                                                                                                                                                                                                                                                                                                                                                                                                                                                                                                                                                                                                                             |

|                                                                                                                                                         |                                                                                                           |                                                                                                    |                                                                                                                                                                                                                                                                                                                                                                                                                                                                                                                                                                                                 |
|---------------------------------------------------------------------------------------------------------------------------------------------------------|-----------------------------------------------------------------------------------------------------------|----------------------------------------------------------------------------------------------------|-------------------------------------------------------------------------------------------------------------------------------------------------------------------------------------------------------------------------------------------------------------------------------------------------------------------------------------------------------------------------------------------------------------------------------------------------------------------------------------------------------------------------------------------------------------------------------------------------|
| EPI_ISL_1063928, EPI_ISL_1063935, EPI_ISL_1063943, EPI_ISL_1063948, EPI_ISL_1063950, EPI_ISL_1063955                                                    | KU Leuven, Rega Institute, Clinical and Epidemiological Virology                                          | KU Leuven, Rega Institute, Clinical and Epidemiological Virology                                   | Tony Wawina-Bokalanga, Bert Vanmechelen, Joan Marti-Carreras, Piet Maes                                                                                                                                                                                                                                                                                                                                                                                                                                                                                                                         |
| EPI_ISL_1064433                                                                                                                                         | DOHMH Fort Greene                                                                                         | New York City Public Health Laboratory                                                             | Jade Wang, et al.                                                                                                                                                                                                                                                                                                                                                                                                                                                                                                                                                                               |
| EPI_ISL_1064762                                                                                                                                         | OCME Office Of Chief Medical Examiner                                                                     | New York City Public Health Laboratory                                                             | Jade Wang, et al.                                                                                                                                                                                                                                                                                                                                                                                                                                                                                                                                                                               |
| EPI_ISL_1064778                                                                                                                                         | DOHMH Fort Greene                                                                                         | New York City Public Health Laboratory                                                             | Jade Wang, et al.                                                                                                                                                                                                                                                                                                                                                                                                                                                                                                                                                                               |
| EPI_ISL_1064780                                                                                                                                         | DOHMH Jamaica                                                                                             | New York City Public Health Laboratory                                                             | Jade Wang, et al.                                                                                                                                                                                                                                                                                                                                                                                                                                                                                                                                                                               |
| EPI_ISL_1064781                                                                                                                                         | DOHMH Chelsea                                                                                             | New York City Public Health Laboratory                                                             | Jade Wang, et al.                                                                                                                                                                                                                                                                                                                                                                                                                                                                                                                                                                               |
| EPI_ISL_1064782                                                                                                                                         | DOHMH Morrisania                                                                                          | New York City Public Health Laboratory                                                             | Jade Wang, et al.                                                                                                                                                                                                                                                                                                                                                                                                                                                                                                                                                                               |
| EPI_ISL_1064787                                                                                                                                         | DOHMH Jamaica                                                                                             | New York City Public Health Laboratory                                                             | Jade Wang, et al.                                                                                                                                                                                                                                                                                                                                                                                                                                                                                                                                                                               |
| EPI_ISL_1064788                                                                                                                                         | DOHMH Corona                                                                                              | New York City Public Health Laboratory                                                             | Jade Wang, et al.                                                                                                                                                                                                                                                                                                                                                                                                                                                                                                                                                                               |
| EPI_ISL_1064789                                                                                                                                         | DOHMH Fort Greene                                                                                         | New York City Public Health Laboratory                                                             | Jade Wang, et al.                                                                                                                                                                                                                                                                                                                                                                                                                                                                                                                                                                               |
| EPI_ISL_1064790                                                                                                                                         | DOHMH Crown Heights                                                                                       | New York City Public Health Laboratory                                                             | Jade Wang, et al.                                                                                                                                                                                                                                                                                                                                                                                                                                                                                                                                                                               |
| EPI_ISL_1064791                                                                                                                                         | OCME Office Of Chief Medical Examiner                                                                     | New York City Public Health Laboratory                                                             | Jade Wang, et al.                                                                                                                                                                                                                                                                                                                                                                                                                                                                                                                                                                               |
| EPI_ISL_1064793                                                                                                                                         | DOHMH Fort Greene                                                                                         | New York City Public Health Laboratory                                                             | Jade Wang, et al.                                                                                                                                                                                                                                                                                                                                                                                                                                                                                                                                                                               |
| EPI_ISL_1064794                                                                                                                                         | OCME Office Of Chief Medical Examiner                                                                     | New York City Public Health Laboratory                                                             | Jade Wang, et al.                                                                                                                                                                                                                                                                                                                                                                                                                                                                                                                                                                               |
| EPI_ISL_1064796                                                                                                                                         | Department of Virus and Microbiological Special Diagnostics, Statens Serum Institut, Copenhagen, Denmark  | Aalborg University                                                                                 | Danish Covid-19 Genome Consortium                                                                                                                                                                                                                                                                                                                                                                                                                                                                                                                                                               |
| EPI_ISL_1065672                                                                                                                                         | AREA DE SALUD CATEDRAL NORESTE                                                                            | Incienza, Instituto Costarricense de Investigación y Enseñanza en Nutrición y Salud                | Francisco Duarte, Hebleen Porras, Claudio Soto-Garita, Estela Cordero, Adriana Godinez, Melany Calderón & Mariel López                                                                                                                                                                                                                                                                                                                                                                                                                                                                          |
| EPI_ISL_1067587                                                                                                                                         | Lighthouse Lab in Milton Keynes                                                                           | Wellcome Sanger Institute for the COVID-19 Genomics UK (COG-UK) Consortium                         | The Lighthouse Lab in Milton Keynes and Alex Alderton, Roberto Amato, Jeffrey Barrett, Sonia Goncalves, Ewan Harrison, David K. Jackson, Ian Johnston, Dominic Kwiatkowski, Cordelia Langford, John Sillitoe on behalf of the Wellcome Sanger Institute COVID-19 Surveillance Team                                                                                                                                                                                                                                                                                                              |
| EPI_ISL_1069468                                                                                                                                         | Lighthouse Lab in Glasgow                                                                                 | Wellcome Sanger Institute for the COVID-19 Genomics UK (COG-UK) Consortium                         | Harper VanSteenhouse, Yumi Kasai, David Gray, Carol Clugston, Anna Dominiczak and Alex Alderton, Roberto Amato, Jeffrey Barrett, Sonia Goncalves, Ewan Harrison, David K. Jackson, Ian Johnston, Dominic Kwiatkowski, Cordelia Langford, John Sillitoe on behalf of the Wellcome Sanger Institute COVID-19 Surveillance Team                                                                                                                                                                                                                                                                    |
| EPI_ISL_1069701                                                                                                                                         | Lighthouse Lab in Milton Keynes                                                                           | Wellcome Sanger Institute for the COVID-19 Genomics UK (COG-UK) Consortium                         | The Lighthouse Lab in Milton Keynes and Alex Alderton, Roberto Amato, Jeffrey Barrett, Sonia Goncalves, Ewan Harrison, David K. Jackson, Ian Johnston, Dominic Kwiatkowski, Cordelia Langford, John Sillitoe on behalf of the Wellcome Sanger Institute COVID-19 Surveillance Team                                                                                                                                                                                                                                                                                                              |
| EPI_ISL_1069737, EPI_ISL_1070402, EPI_ISL_1070444, EPI_ISL_1071130                                                                                      | Lighthouse Lab in Alderley Park                                                                           | Wellcome Sanger Institute for the COVID-19 Genomics UK (COG-UK) Consortium                         | Jacquelyn Wynn, Mairead Hyland, The Lighthouse Lab in Alderley Park and Alex Alderton, Roberto Amato, Jeffrey Barrett, Sonia Goncalves, Ewan Harrison, David K. Jackson, Ian Johnston, Dominic Kwiatkowski, Cordelia Langford, John Sillitoe on behalf of the Wellcome Sanger Institute COVID-19 Surveillance Team                                                                                                                                                                                                                                                                              |
| EPI_ISL_1072099, EPI_ISL_1072327                                                                                                                        | Lighthouse Lab in Milton Keynes                                                                           | Wellcome Sanger Institute for the COVID-19 Genomics UK (COG-UK) Consortium                         | The Lighthouse Lab in Milton Keynes and Alex Alderton, Roberto Amato, Jeffrey Barrett, Sonia Goncalves, Ewan Harrison, David K. Jackson, Ian Johnston, Dominic Kwiatkowski, Cordelia Langford, John Sillitoe on behalf of the Wellcome Sanger Institute COVID-19 Surveillance Team                                                                                                                                                                                                                                                                                                              |
| EPI_ISL_1072365                                                                                                                                         | Lighthouse Lab in Glasgow                                                                                 | Wellcome Sanger Institute for the COVID-19 Genomics UK (COG-UK) Consortium                         | Harper VanSteenhouse, Yumi Kasai, David Gray, Carol Clugston, Anna Dominiczak and Alex Alderton, Roberto Amato, Jeffrey Barrett, Sonia Goncalves, Ewan Harrison, David K. Jackson, Ian Johnston, Dominic Kwiatkowski, Cordelia Langford, John Sillitoe on behalf of the Wellcome Sanger Institute COVID-19 Surveillance Team                                                                                                                                                                                                                                                                    |
| EPI_ISL_1072571                                                                                                                                         | University of Balamand                                                                                    | Microbial Genomics Lab, Lebanese American University, Byblos                                       | Mira El Char, Youssef Bassim, Sima Tokajian                                                                                                                                                                                                                                                                                                                                                                                                                                                                                                                                                     |
| EPI_ISL_1072985                                                                                                                                         | Israel Central Virology laboratory                                                                        | Israel National Consortium for SARS-CoV-2 sequencing                                               | Neta Zuckerman, Efrat Dahan Bucris, Michal Mandelboim, Dana Bar-Ilan, Oran Erster, Tzvia Mann, Omer Murik, David A. Zeevi, Assaf Rokney, Joseph Jaffe, Eva Nachum, Maya Davidovich Cohen, Ephraim Fass, Gal Zizelski Valenci, Mor Rubinstein, Efrat Rorman, Israel Nissan, Efrat Glick-Saar, Omri Nayshool, Gideon Rechavi, Ella Mendelson, Orna Mor                                                                                                                                                                                                                                            |
| EPI_ISL_1073211                                                                                                                                         | Ministry of Health Turkey                                                                                 | Ministry of Health Turkey                                                                          | Fatma Bayraktar, Yasemin Cogun, Süleyman Yalcin, Aye Baak Alta, Gülay Korukluolu                                                                                                                                                                                                                                                                                                                                                                                                                                                                                                                |
| EPI_ISL_1073642, EPI_ISL_1073738, EPI_ISL_1073746, EPI_ISL_1073749, EPI_ISL_1073750, EPI_ISL_1073751, EPI_ISL_1073758, EPI_ISL_1073759, EPI_ISL_1073762 | SYNLAB - Laboratoire J. Collard                                                                           | GIGA Medical Genomics                                                                              | Keith Durkin, Maria Artesi, Sébastien Bontems, Raphaël Boreux, Bouchra Boujemla, Nathalie Renotte, Cécile Meex, Pierrette Melin, Marie-Pierre Hayette, Vincent Bours                                                                                                                                                                                                                                                                                                                                                                                                                            |
| EPI_ISL_1076387                                                                                                                                         | Clinical Microbiology Laboratory, NewYork Presbyterian Hospital/Columbia University Irving Medical Center | Uhlemann Laboratory, Columbia University Irving Medical Center                                     | Medini K. Annavajhala, Anne-Catrin Uhlemann, Hiroshi Mohri, David Ho                                                                                                                                                                                                                                                                                                                                                                                                                                                                                                                            |
| EPI_ISL_1080776, EPI_ISL_1080777                                                                                                                        | Houston Methodist Hospital                                                                                | Houston Methodist Hospital                                                                         | S. Wesley Long, Randall J. Olsen, Paul A. Christensen, Sishir Subedi, Robert Olson, James J. Davis, Matthew Ojeda Saavedra, Prasanti Yerramilli, Layne Pruitt, Kristina Reppond, Madison N. Shyer, Jessica Cambric, Ilya J. Finkelstein, Jimmy Gollihar, and James M. Musser                                                                                                                                                                                                                                                                                                                    |
| EPI_ISL_1080994                                                                                                                                         | Helix/Illumina                                                                                            | Respiratory Viruses Branch, Division of Viral Diseases, Centers for Disease Control and Prevention | Peter W. Cook, Dakota Howard, Dhvani Batra, Ben L. Rambo-Martin, Eileen de Feo, Jan Antico, Christine Tran, Matthew Tolentino, Shannon Wickline, Kim Gietzen, Brad Sickler, Jingtao Liu, Eric Allen, Phil Febbo, Summer Galloway, Nicole L. Washington, Simon White, Geraint Levan, Kelly Schiabor Barrett, Elizabeth Cirulli, Alexandre Bolze, Ary Ascencio, Charlotte Rivera-Garcia, Ryan Cho, Jason Nguyen, Sherry Wang, Jimmy Ramirez, Tyler Cassens, Efrén Sandoval, Magnus Isaksson, William Lee, David Becker, Marc Laurent, James Lu, Clinton R. Paden, Suxiang Tong, Duncan MacCannell |
| EPI_ISL_1081058, EPI_ISL_1081060, EPI_ISL_1081065, EPI_ISL_1081066, EPI_ISL_1081070, EPI_ISL_1081077, EPI_ISL_1081078, EPI_ISL_1081079, EPI_ISL_1081094 | Laboratory Corporation of America                                                                         | Respiratory Viruses Branch, Division of Viral Diseases, Centers for Disease Control and Prevention | Peter W. Cook, Dakota Howard, Dhvani Batra, Ben L. Rambo-Martin, Eileen de Feo, Jan Antico, Christine Tran, Matthew Tolentino, Shannon Wickline, Kim Gietzen, Brad Sickler, Jingtao Liu, Eric Allen, Phil Febbo, Summer Galloway, Nicole L. Washington, Simon White, Geraint Levan, Kelly Schiabor Barrett, Elizabeth Cirulli, Alexandre Bolze, Ary Ascencio, Charlotte Rivera-Garcia, Ryan Cho, Jason Nguyen, Sherry Wang, Jimmy Ramirez, Tyler Cassens, Efrén Sandoval, Magnus Isaksson, William Lee, David Becker, Marc Laurent, James Lu, Clinton R. Paden, Suxiang Tong, Duncan MacCannell |
| EPI_ISL_1081205, EPI_ISL_1081206, EPI_ISL_1081207, EPI_ISL_1081208, EPI_ISL_1081209, EPI_ISL_1081210, EPI_ISL_1081215                                   | Maryland Public Health Laboratory                                                                         | Maryland Public Health Laboratory                                                                  | Maryland Department of Health Laboratories Administration                                                                                                                                                                                                                                                                                                                                                                                                                                                                                                                                       |
| EPI_ISL_1081265                                                                                                                                         | Laboratory Corporation of America                                                                         | Respiratory Viruses Branch, Division of Viral Diseases, Centers for Disease Control and Prevention | Peter W. Cook, Dakota Howard, Dhvani Batra, Ben L. Rambo-Martin, Eileen de Feo, Jan Antico, Christine Tran, Matthew Tolentino, Shannon Wickline, Kim Gietzen, Brad Sickler, Jingtao Liu, Eric Allen, Phil Febbo, Summer Galloway, Nicole L. Washington, Simon White, Geraint Levan, Kelly Schiabor Barrett, Elizabeth Cirulli, Alexandre Bolze, Ary Ascencio, Charlotte Rivera-Garcia, Ryan Cho, Jason Nguyen, Sherry Wang, Jimmy Ramirez, Tyler Cassens, Efrén Sandoval, Magnus Isaksson, William Lee, David Becker, Marc Laurent, James Lu, Clinton R. Paden, Suxiang Tong, Duncan MacCannell |
| EPI_ISL_1081271                                                                                                                                         | Bozeman Health Deaconess Hospital                                                                         | Wiedenhft lab, Montana State University                                                            | Artem Nemudryi, Anna Nemudraia, Tanner Wiegand, Joseph Nichols, Deann T. Snyder, Jodi F. Hedges, Calvin Cicha, Helen Lee, Karl K. Vanderwood, Diane Bimczok, Mark A. Jutila and Blake Wiedenhft                                                                                                                                                                                                                                                                                                                                                                                                 |
| EPI_ISL_1081322                                                                                                                                         | SOUTH SUPER HI-WAY                                                                                        | Philippine Genome Center                                                                           | Francis A. Tablizo, Cynthia P. Saloma, Marc Jerrone R. Castro, Kenneth M. Kim, Maria Sofia L. Yanzgon, Carlo M. Lapid, Benedict A. Maralit, Marc Edsel C. Ayes, Jan Michael C. Yap, Jo-Hannah S. Llamas, Sheila Mae M. Araiza, Kris P. Punayan, Irish Coleen A. Asin, Candice Francheska B. Tambaoan, Asia                                                                                                                                                                                                                                                                                      |
| EPI_ISL_1081795                                                                                                                                         |                                                                                                           |                                                                                                    |                                                                                                                                                                                                                                                                                                                                                                                                                                                                                                                                                                                                 |

|                                                                                                                                                                                                            |                                                                                                                |                                                                                                                                                                                                                                                   |                           |                                                                                                                                                                                                                                                                                                                                                                                                                                                                                                                                                                                                                                                                                                                |
|------------------------------------------------------------------------------------------------------------------------------------------------------------------------------------------------------------|----------------------------------------------------------------------------------------------------------------|---------------------------------------------------------------------------------------------------------------------------------------------------------------------------------------------------------------------------------------------------|---------------------------|----------------------------------------------------------------------------------------------------------------------------------------------------------------------------------------------------------------------------------------------------------------------------------------------------------------------------------------------------------------------------------------------------------------------------------------------------------------------------------------------------------------------------------------------------------------------------------------------------------------------------------------------------------------------------------------------------------------|
|                                                                                                                                                                                                            |                                                                                                                |                                                                                                                                                                                                                                                   |                           | Louisa U. Chong, Karol Sophia Agape R. Padilla, Rianna Patricia S. Cruz, El King D. Morado, Joshua Gregor A. Dizon, Eva Maria Cutiongco-de la Paz, Alethea R. de Guzman, Razel Nikka M. Hao, Arianne A. Zamora, Devon Ray Pacial, Juan Antonio R. Magalang, Marissa Alejandria, Celia Carlos, Anna Ong-Lim, Edsel Maurice Salvaña, John Q. Wong, Jaime C. Montoya, and Maria Rosario Singh-Vergeire                                                                                                                                                                                                                                                                                                            |
| EPI_ISL_1081797, EPI_ISL_1081798, EPI_ISL_1081801                                                                                                                                                          | Baguio General Hospital and Medical Center                                                                     | Philippine Genome Center                                                                                                                                                                                                                          |                           | Francis A. Tablizo, Cynthia P. Saloma, Marc Jerrone R. Castro, Kenneth M. Kim, Maria Sofia L. Yangzon, Carlo M. Lapid, Benedict A. Maralit, Marc Edsel C. Ayes, Jan Michael C. Yap, Jo-Hannah S. Llames, Sheila Mae M. Araiza, Kris P. Punayan, Irish Coleen A. Asin, Candice Francheska B. Tambaoan, Asia Louisa U. Chong, Karol Sophia Agape R. Padilla, Rianna Patricia S. Cruz, El King D. Morado, Joshua Gregor A. Dizon, Eva Maria Cutiongco-de la Paz, Alethea R. de Guzman, Razel Nikka M. Hao, Arianne A. Zamora, Devon Ray Pacial, Juan Antonio R. Magalang, Marissa Alejandria, Celia Carlos, Anna Ong-Lim, Edsel Maurice Salvaña, John Q. Wong, Jaime C. Montoya, and Maria Rosario Singh-Vergeire |
| EPI_ISL_1081811, EPI_ISL_1081814, EPI_ISL_1081816, EPI_ISL_1081818                                                                                                                                         | Philippine Red Cross - Port Area                                                                               | Philippine Genome Center                                                                                                                                                                                                                          |                           | Francis A. Tablizo, Cynthia P. Saloma, Marc Jerrone R. Castro, Kenneth M. Kim, Maria Sofia L. Yangzon, Carlo M. Lapid, Benedict A. Maralit, Marc Edsel C. Ayes, Jan Michael C. Yap, Jo-Hannah S. Llames, Sheila Mae M. Araiza, Kris P. Punayan, Irish Coleen A. Asin, Candice Francheska B. Tambaoan, Asia Louisa U. Chong, Karol Sophia Agape R. Padilla, Rianna Patricia S. Cruz, El King D. Morado, Joshua Gregor A. Dizon, Eva Maria Cutiongco-de la Paz, Alethea R. de Guzman, Razel Nikka M. Hao, Arianne A. Zamora, Devon Ray Pacial, Juan Antonio R. Magalang, Marissa Alejandria, Celia Carlos, Anna Ong-Lim, Edsel Maurice Salvaña, John Q. Wong, Jaime C. Montoya, and Maria Rosario Singh-Vergeire |
| EPI_ISL_1081819                                                                                                                                                                                            | University of the East Ramon Magsaysay Memorial Medical Center                                                 | Philippine Genome Center                                                                                                                                                                                                                          |                           | Francis A. Tablizo, Cynthia P. Saloma, Marc Jerrone R. Castro, Kenneth M. Kim, Maria Sofia L. Yangzon, Carlo M. Lapid, Benedict A. Maralit, Marc Edsel C. Ayes, Jan Michael C. Yap, Jo-Hannah S. Llames, Sheila Mae M. Araiza, Kris P. Punayan, Irish Coleen A. Asin, Candice Francheska B. Tambaoan, Asia Louisa U. Chong, Karol Sophia Agape R. Padilla, Rianna Patricia S. Cruz, El King D. Morado, Joshua Gregor A. Dizon, Eva Maria Cutiongco-de la Paz, Alethea R. de Guzman, Razel Nikka M. Hao, Arianne A. Zamora, Devon Ray Pacial, Juan Antonio R. Magalang, Marissa Alejandria, Celia Carlos, Anna Ong-Lim, Edsel Maurice Salvaña, John Q. Wong, Jaime C. Montoya, and Maria Rosario Singh-Vergeire |
| EPI_ISL_1081825                                                                                                                                                                                            | Baguio General Hospital and Medical Center                                                                     | Philippine Genome Center                                                                                                                                                                                                                          |                           | Francis A. Tablizo, Cynthia P. Saloma, Marc Jerrone R. Castro, Kenneth M. Kim, Maria Sofia L. Yangzon, Carlo M. Lapid, Benedict A. Maralit, Marc Edsel C. Ayes, Jan Michael C. Yap, Jo-Hannah S. Llames, Sheila Mae M. Araiza, Kris P. Punayan, Irish Coleen A. Asin, Candice Francheska B. Tambaoan, Asia Louisa U. Chong, Karol Sophia Agape R. Padilla, Rianna Patricia S. Cruz, El King D. Morado, Joshua Gregor A. Dizon, Eva Maria Cutiongco-de la Paz, Alethea R. de Guzman, Razel Nikka M. Hao, Arianne A. Zamora, Devon Ray Pacial, Juan Antonio R. Magalang, Marissa Alejandria, Celia Carlos, Anna Ong-Lim, Edsel Maurice Salvaña, John Q. Wong, Jaime C. Montoya, and Maria Rosario Singh-Vergeire |
| EPI_ISL_1081830                                                                                                                                                                                            | Philippine Red Cross - Port Area                                                                               | Philippine Genome Center                                                                                                                                                                                                                          |                           | Francis A. Tablizo, Cynthia P. Saloma, Marc Jerrone R. Castro, Kenneth M. Kim, Maria Sofia L. Yangzon, Carlo M. Lapid, Benedict A. Maralit, Marc Edsel C. Ayes, Jan Michael C. Yap, Jo-Hannah S. Llames, Sheila Mae M. Araiza, Kris P. Punayan, Irish Coleen A. Asin, Candice Francheska B. Tambaoan, Asia Louisa U. Chong, Karol Sophia Agape R. Padilla, Rianna Patricia S. Cruz, El King D. Morado, Joshua Gregor A. Dizon, Eva Maria Cutiongco-de la Paz, Alethea R. de Guzman, Razel Nikka M. Hao, Arianne A. Zamora, Devon Ray Pacial, Juan Antonio R. Magalang, Marissa Alejandria, Celia Carlos, Anna Ong-Lim, Edsel Maurice Salvaña, John Q. Wong, Jaime C. Montoya, and Maria Rosario Singh-Vergeire |
| EPI_ISL_1081831                                                                                                                                                                                            | Philippine Red Cross - Clark                                                                                   | Philippine Genome Center                                                                                                                                                                                                                          |                           | Francis A. Tablizo, Cynthia P. Saloma, Marc Jerrone R. Castro, Kenneth M. Kim, Maria Sofia L. Yangzon, Carlo M. Lapid, Benedict A. Maralit, Marc Edsel C. Ayes, Jan Michael C. Yap, Jo-Hannah S. Llames, Sheila Mae M. Araiza, Kris P. Punayan, Irish Coleen A. Asin, Candice Francheska B. Tambaoan, Asia Louisa U. Chong, Karol Sophia Agape R. Padilla, Rianna Patricia S. Cruz, El King D. Morado, Joshua Gregor A. Dizon, Eva Maria Cutiongco-de la Paz, Alethea R. de Guzman, Razel Nikka M. Hao, Arianne A. Zamora, Devon Ray Pacial, Juan Antonio R. Magalang, Marissa Alejandria, Celia Carlos, Anna Ong-Lim, Edsel Maurice Salvaña, John Q. Wong, Jaime C. Montoya, and Maria Rosario Singh-Vergeire |
| EPI_ISL_1081837                                                                                                                                                                                            | Laboratory of Genetics and Personalized Medicine, Zan Mitrev Clinic                                            | Laboratory of Genetics and Personalized Medicine, Zan Mitrev Clinic                                                                                                                                                                               |                           | Kunglilovski G. et al.                                                                                                                                                                                                                                                                                                                                                                                                                                                                                                                                                                                                                                                                                         |
| EPI_ISL_1081991, EPI_ISL_1082120                                                                                                                                                                           | Department of Virology and Immunology, University of Helsinki and Helsinki University Hospital, HUSLAB Finland | Department of Virology, Faculty of Medicine, University of Helsinki, Helsinki, Finland                                                                                                                                                            |                           | Teemu Smura, Ravi Kant, Phuoc Truong, Hussein Alburkat, Hannimari Kallio-Kokko, Jenni Virtanen, Maija Suvaranto, Essi Korhonen, Sari Hannula, Harri Kangas, Hanna Liimatainen, Satu Kurekela, Hanna Jarva, Maija Lappalainen, Pekka Ellonen, Olli Vapalahti                                                                                                                                                                                                                                                                                                                                                                                                                                                    |
| EPI_ISL_1082259                                                                                                                                                                                            | Middlemore Hospital                                                                                            | Institute of Environmental Science and Research (ESR)                                                                                                                                                                                             |                           | Rachel Boyle, SallyAnn Harbison, Olivia Stroeven, Xiaoyun Ren, Matt Storey, Nikki Freed, Muhammad Faisal, Jing Wang, Hermes Perez, Anja Werner, Antje van der Linden, Arlo Upton, Chris Mansell, David Hammer, Dragana Drinkovic, Gary McAuliffe, Hana Sofia Andersson, James Ussher, Jill Sherwood, Josh Freeman, Julia Howard, Juliet Ely, Mary DeAlmeida, Matt Blakiston, Matthew Rogers, Max Bloomfield, Michael Addidle, Michelle Balm, Sally Roberts, Sarah Jefferies, Sharmini Muttaiyah, Susan Morpeth, Susan Taylor, Timothy Blackmore, Vani Sathyendran, Veronica Playle, Virginia Hope, Erasmus Smit, Lauren Jelly, Olin Silander, Joep de Ligt                                                     |
| EPI_ISL_1082388, EPI_ISL_1082405, EPI_ISL_1082407, EPI_ISL_1082408, EPI_ISL_1082410, EPI_ISL_1082411, EPI_ISL_1082417, EPI_ISL_1082426, EPI_ISL_1082428, EPI_ISL_1082429, EPI_ISL_1082430, EPI_ISL_1082445 | see above                                                                                                      | Ministry of Health Turkey                                                                                                                                                                                                                         | Ministry of Health Turkey | Fatma Bayraktar, Yasemin Cogun, Süleyman Yalcin, Aye Baak Alta, Gülay Korukluolu                                                                                                                                                                                                                                                                                                                                                                                                                                                                                                                                                                                                                               |
| EPI_ISL_1082487                                                                                                                                                                                            | ASL Napoli 1 Centro                                                                                            | AMES Centro Poliagnostico Strumentale S.r.l.                                                                                                                                                                                                      |                           | "Giovanni Savarese, Raffaella Ruggiero, Eloisa Evangelista, Antonella Di Carlo, Luisa Circelli, Luigi D'Amore, Roberto Sirica, Nadia Petrillo, Monica Ianniello, Antonio Fico"                                                                                                                                                                                                                                                                                                                                                                                                                                                                                                                                 |
| EPI_ISL_1082585                                                                                                                                                                                            | Randox Laboratories                                                                                            | Wellcome Sanger Institute for the COVID-19 Genomics UK (COG-UK) Consortium                                                                                                                                                                        |                           | Randox Laboratories and Alex Alderton, Roberto Amato, Jeffrey Barrett, Sonia Goncalves, Ewan Harrison, David K. Jackson, Ian Johnston, Dominic Kwiatkowski, Cordelia Langford, John Sillitoe on behalf of the Wellcome Sanger Institute COVID-19 Surveillance Team                                                                                                                                                                                                                                                                                                                                                                                                                                             |
| EPI_ISL_1083074                                                                                                                                                                                            | Lighthouse Lab in Milton Keynes                                                                                | Wellcome Sanger Institute for the COVID-19 Genomics UK (COG-UK) Consortium                                                                                                                                                                        |                           | The Lighthouse Lab in Milton Keynes and Alex Alderton, Roberto Amato, Jeffrey Barrett, Sonia Goncalves, Ewan Harrison, David K. Jackson, Ian Johnston, Dominic Kwiatkowski, Cordelia Langford, John Sillitoe on behalf of the Wellcome Sanger Institute COVID-19 Surveillance Team                                                                                                                                                                                                                                                                                                                                                                                                                             |
| EPI_ISL_1083312, EPI_ISL_1083642, EPI_ISL_1083778, EPI_ISL_1083794                                                                                                                                         | Lighthouse Lab in Alderley Park                                                                                | Wellcome Sanger Institute for the COVID-19 Genomics UK (COG-UK) Consortium                                                                                                                                                                        |                           | Jacquelyn Wynn, Mairead Hyland, The Lighthouse Lab in Alderley Park and Alex Alderton, Roberto Amato, Jeffrey Barrett, Sonia Goncalves, Ewan Harrison, David K. Jackson, Ian Johnston, Dominic Kwiatkowski, Cordelia Langford, John Sillitoe on behalf of the Wellcome Sanger Institute COVID-19 Surveillance Team                                                                                                                                                                                                                                                                                                                                                                                             |
| EPI_ISL_1083879, EPI_ISL_1083930, EPI_ISL_1084007, EPI_ISL_1084103                                                                                                                                         | Lighthouse Lab in Milton Keynes                                                                                | Wellcome Sanger Institute for the COVID-19 Genomics UK (COG-UK) Consortium                                                                                                                                                                        |                           | The Lighthouse Lab in Milton Keynes and Alex Alderton, Roberto Amato, Jeffrey Barrett, Sonia Goncalves, Ewan Harrison, David K. Jackson, Ian Johnston, Dominic Kwiatkowski, Cordelia Langford, John Sillitoe on behalf of the Wellcome Sanger Institute COVID-19 Surveillance Team                                                                                                                                                                                                                                                                                                                                                                                                                             |
| EPI_ISL_1084225, EPI_ISL_1084529                                                                                                                                                                           | Lighthouse Lab in Glasgow                                                                                      | Wellcome Sanger Institute for the COVID-19 Genomics UK (COG-UK) Consortium                                                                                                                                                                        |                           | Harper VanSteenhouse, Yumi Kasai, David Gray, Carol Clugston, Anna Dominiczak and Alex Alderton, Roberto Amato, Jeffrey Barrett, Sonia Goncalves, Ewan Harrison, David K. Jackson, Ian Johnston, Dominic Kwiatkowski, Cordelia Langford, John Sillitoe on behalf of the Wellcome Sanger Institute COVID-19 Surveillance Team                                                                                                                                                                                                                                                                                                                                                                                   |
| EPI_ISL_1084610                                                                                                                                                                                            | Hospital for Infectious Diseases, Molecular Diagnostics Laboratory, Warsaw, Poland                             | 8. Laboratory of Recombinant Vaccines, Intercollegiate Faculty of Biotechnology University of Gdansk and Medical University of Gdansk, 2. ViroGenetics - BSL3 Laboratory of Virology, Maopolska Centre of Biotechnology, Jagiellonian University  |                           | Lukasz Rabalski, Maciej Kosinski, Natalia Mazur-Panasiuk, Aneta Kopacz, Piotr Zabek, Tomasz Dyda, Andrzej Horban, Krzysztof Pyrc, Krystyna Bienkowska-Szewczyk                                                                                                                                                                                                                                                                                                                                                                                                                                                                                                                                                 |
| EPI_ISL_1084612                                                                                                                                                                                            | Hospital for Infectious Diseases, Molecular Diagnostics Laboratory, Warsaw, Poland                             | 40. Laboratory of Recombinant Vaccines, Intercollegiate Faculty of Biotechnology University of Gdansk and Medical University of Gdansk, 2. ViroGenetics - BSL3 Laboratory of Virology, Maopolska Centre of Biotechnology, Jagiellonian University |                           | Lukasz Rabalski, Maciej Kosinski, Natalia Mazur-Panasiuk, Aneta Kopacz, Piotr Zabek, Tomasz Dyda, Andrzej Horban, Krzysztof Pyrc, Krystyna Bienkowska-Szewczyk                                                                                                                                                                                                                                                                                                                                                                                                                                                                                                                                                 |
| EPI_ISL_1084841, EPI_ISL_1084879                                                                                                                                                                           | University Hospitals of Geneva, Laboratory of Virology                                                         | HUG, Laboratory of Virology and the Health2030 Genome Center                                                                                                                                                                                      |                           | Samuel Cordey, Ana Rita Goncalves, Laurent Kaiser, Lorenzo Cerutti, Henri Pegeot, Melyssa Elies, Deborah Penet, Keith Harshman, Ioannis Xenarios, Emmanouil Dermitzakis                                                                                                                                                                                                                                                                                                                                                                                                                                                                                                                                        |
| EPI_ISL_1085047                                                                                                                                                                                            | ASL Napoli 1 Centro                                                                                            | AMES Centro Poliagnostico Strumentale S.r.l.                                                                                                                                                                                                      |                           | "Giovanni Savarese, Raffaella Ruggiero, Eloisa Evangelista, Antonella Di Carlo, Luisa Circelli, Luigi D'Amore, Roberto Sirica, Nadia Petrillo, Monica Ianniello, Antonio Fico"                                                                                                                                                                                                                                                                                                                                                                                                                                                                                                                                 |
| EPI_ISL_1085093, EPI_ISL_1085161, EPI_ISL_1085163, EPI_ISL_1085166, EPI_ISL_1085171                                                                                                                        | NYU Langone Health                                                                                             | Departments of Pathology and Medicine, New York University School of Medicine                                                                                                                                                                     |                           | Adriana Heguy, Dacia Dimartino, Emily Guzman, Christian Marier, Peter Meyn, Sitharam Ramaswami, Gael Westby, Paul Zappile, Yutong Zhang, Paolo Cotzia, Guiqing Wang                                                                                                                                                                                                                                                                                                                                                                                                                                                                                                                                            |
| EPI_ISL_1085267, EPI_ISL_1085275                                                                                                                                                                           | Hôpital Henri Mondor                                                                                           | Department of Virology, Henri Mondor University Hospital,                                                                                                                                                                                         |                           | Christophe Rodriguez, Slim Fourati, Vanessa Demontant, Guillaume Gricourt, Melissa N'Dabi, Alexandre Soulier, Elisabeth Trawinski, Jean-Michel                                                                                                                                                                                                                                                                                                                                                                                                                                                                                                                                                                 |

|                                                                                                                                                                                                                                                                                                                                                                                                                                                                                                                                                                                                  |                                                                                                                   |                                                                                                                                            |                                                                                                                                                                                                                                                                                                                              |
|--------------------------------------------------------------------------------------------------------------------------------------------------------------------------------------------------------------------------------------------------------------------------------------------------------------------------------------------------------------------------------------------------------------------------------------------------------------------------------------------------------------------------------------------------------------------------------------------------|-------------------------------------------------------------------------------------------------------------------|--------------------------------------------------------------------------------------------------------------------------------------------|------------------------------------------------------------------------------------------------------------------------------------------------------------------------------------------------------------------------------------------------------------------------------------------------------------------------------|
|                                                                                                                                                                                                                                                                                                                                                                                                                                                                                                                                                                                                  |                                                                                                                   | Assistance Publique Hôpitaux de Paris, Université Paris-Est Créteil, INSERM U955                                                           | Pawlotsky                                                                                                                                                                                                                                                                                                                    |
| EPI_ISL_1085322                                                                                                                                                                                                                                                                                                                                                                                                                                                                                                                                                                                  | Hôpital Bicêtre                                                                                                   | Department of Virology, Henri Mondor University Hospital, Assistance Publique Hôpitaux de Paris, Université Paris-Est Créteil, INSERM U955 | Christophe Rodriguez, Slim Fourati, Vanessa Demontant, Guillaume Gricourt, Melissa N'Debi, Alexandre Soulier, Elisabeth Trawinski, Jean-Michel Pawlotsky                                                                                                                                                                     |
| EPI_ISL_1085453                                                                                                                                                                                                                                                                                                                                                                                                                                                                                                                                                                                  | Hôpital Henri Mondor                                                                                              | Department of Virology, Henri Mondor University Hospital, Assistance Publique Hôpitaux de Paris, Université Paris-Est Créteil, INSERM U955 | Christophe Rodriguez, Slim Fourati, Vanessa Demontant, Guillaume Gricourt, Melissa N'Debi, Alexandre Soulier, Elisabeth Trawinski, Jean-Michel Pawlotsky                                                                                                                                                                     |
| EPI_ISL_1085456                                                                                                                                                                                                                                                                                                                                                                                                                                                                                                                                                                                  | Groupe LCD                                                                                                        | Department of Virology, Henri Mondor University Hospital, Assistance Publique Hôpitaux de Paris, Université Paris-Est Créteil, INSERM U955 | Christophe Rodriguez, Slim Fourati, Vanessa Demontant, Guillaume Gricourt, Melissa N'Debi, Alexandre Soulier, Elisabeth Trawinski, Jean-Michel Pawlotsky                                                                                                                                                                     |
| EPI_ISL_1085588, EPI_ISL_1085600                                                                                                                                                                                                                                                                                                                                                                                                                                                                                                                                                                 | Hôpital Henri Mondor                                                                                              | Department of Virology, Henri Mondor University Hospital, Assistance Publique Hôpitaux de Paris, Université Paris-Est Créteil, INSERM U955 | Christophe Rodriguez, Slim Fourati, Vanessa Demontant, Guillaume Gricourt, Melissa N'Debi, Alexandre Soulier, Elisabeth Trawinski, Jean-Michel Pawlotsky                                                                                                                                                                     |
| EPI_ISL_1085695, EPI_ISL_1085759, EPI_ISL_1085766                                                                                                                                                                                                                                                                                                                                                                                                                                                                                                                                                | Hôpital Pitié-Salpêtrière                                                                                         | Department of Virology, Henri Mondor University Hospital, Assistance Publique Hôpitaux de Paris, Université Paris-Est Créteil, INSERM U955 | Christophe Rodriguez, Slim Fourati, Vanessa Demontant, Guillaume Gricourt, Melissa N'Debi, Alexandre Soulier, Elisabeth Trawinski, Jean-Michel Pawlotsky                                                                                                                                                                     |
| EPI_ISL_1091180, EPI_ISL_1091183, EPI_ISL_1091189, EPI_ISL_1091190, EPI_ISL_1091194                                                                                                                                                                                                                                                                                                                                                                                                                                                                                                              | Croatian Institute of Public Health                                                                               | Croatian Institute of Public Health                                                                                                        | Irena Tabain, Ivana Ferenak                                                                                                                                                                                                                                                                                                  |
| EPI_ISL_1091401, EPI_ISL_1091404, EPI_ISL_1091413                                                                                                                                                                                                                                                                                                                                                                                                                                                                                                                                                | National Institute of Public Health - National Institute of Hygiene                                               | 1. National Institute of Public Health - National Institute of Hygiene; 2. Eurofins Genomics Europe Sequencing GmbH                        | Wokowicz Tomasz, Zacharczuk Katarzyna, Sadkowska-Todys Magorzata, Gierczyki Rafa, Eurofins Genomics Europe Sequencing Team, ECDC COVID-19 WGS support team                                                                                                                                                                   |
| EPI_ISL_1091488                                                                                                                                                                                                                                                                                                                                                                                                                                                                                                                                                                                  | Institute of Virology, Biomedical Research Center of the Slovak Academy of Sciences, Bratislava                   | Faculty of Natural Sciences, Comenius University, Bratislava                                                                               | Broa Brejová, Viktória abanová, Kristína Boršová, Viktória Hodorová, Sabina Fumaová Havlíková, Juraj Kopáek, Martina Liková, ubomira Lukáiková, Martina Neboháová, Monika Sláviková, Tomáš Vina, Jozef Nosek, Boris Klempa                                                                                                   |
| EPI_ISL_1091791                                                                                                                                                                                                                                                                                                                                                                                                                                                                                                                                                                                  | Laboratorio Genzano - ASL RM 6                                                                                    | INMI Lazzaro Spallanzani IRCCS                                                                                                             | O Butera, CEM Gruber, B Bartolini, E Giombini, F Messina, M Rueca, G Traminì, E Conti, MR Capobianchi, A Di Caro                                                                                                                                                                                                             |
| EPI_ISL_1091814, EPI_ISL_1091815, EPI_ISL_1091816, EPI_ISL_1091825                                                                                                                                                                                                                                                                                                                                                                                                                                                                                                                               | Yale Clinical Virology Laboratory                                                                                 | Grubaugh Lab - Yale School of Public Health                                                                                                | Mary Petrone, Joseph Fauver, Tara Alpert, Anderson Brito, Mallery Breban, Anne Wylie, Chantal Vogels, Annie Watkins, Chaney Kalinich, Isabel Ott, Nathan Grubaugh                                                                                                                                                            |
| EPI_ISL_1091872, EPI_ISL_1091891, EPI_ISL_1091895, EPI_ISL_1091896                                                                                                                                                                                                                                                                                                                                                                                                                                                                                                                               | Tempus                                                                                                            | Grubaugh Lab - Yale School of Public Health                                                                                                | Mary Petrone, Joseph Fauver, Tara Alpert, Anderson Brito, Mallery Breban, Anne Wylie, Chantal Vogels, Annie Watkins, Chaney Kalinich, Isabel Ott, Nathan Grubaugh                                                                                                                                                            |
| EPI_ISL_1092460, EPI_ISL_1092872                                                                                                                                                                                                                                                                                                                                                                                                                                                                                                                                                                 | National Virus Reference Laboratory                                                                               | National Virus Reference Laboratory                                                                                                        | Zoe Yandle, Charlene Bennet, Gabriel Gonzalez, Michael Carr, Jonathan Dean, Cillian F De Gascun                                                                                                                                                                                                                              |
| EPI_ISL_1093207                                                                                                                                                                                                                                                                                                                                                                                                                                                                                                                                                                                  | KU Leuven, Rega Institute, Clinical and Epidemiological Virology                                                  | KU Leuven, Rega Institute, Clinical and Epidemiological Virology                                                                           | Tony Wawina-Bokalanga, Bert Vanmechelen, Joan Marti-Carerras, Piet Maes                                                                                                                                                                                                                                                      |
| EPI_ISL_1093436, EPI_ISL_1093438, EPI_ISL_1093441, EPI_ISL_1093445, EPI_ISL_1093456                                                                                                                                                                                                                                                                                                                                                                                                                                                                                                              | Nigerian Centre for Disease Control (NCDC)                                                                        | African Centre of Excellence for Genomics of Infectious Diseases (ACEGID), Redeemer's University                                           | Olawoye, I.B., et al                                                                                                                                                                                                                                                                                                         |
| EPI_ISL_1095412                                                                                                                                                                                                                                                                                                                                                                                                                                                                                                                                                                                  | Virginia Division of Consolidated Laboratory Services                                                             | Virginia Division of Consolidated Laboratory Services                                                                                      | Virginia DCLS                                                                                                                                                                                                                                                                                                                |
| EPI_ISL_1095452                                                                                                                                                                                                                                                                                                                                                                                                                                                                                                                                                                                  | University of Wisconsin-Madison AIDS Vaccine Research Laboratories                                                | University of Wisconsin-Madison AIDS Vaccine Research Laboratories                                                                         | Gage Moreno, Katarina Braun, et al. AIDS Vaccine Research Laboratories                                                                                                                                                                                                                                                       |
| EPI_ISL_1096162, EPI_ISL_1096164                                                                                                                                                                                                                                                                                                                                                                                                                                                                                                                                                                 | Hematology Laboratory, Section of Molecular Diagnostics, University Clinical Centre, Medical University of Gdansk | Laboratory of Recombinant Vaccines                                                                                                         | Lukasz Rabalski, Maciej Kosinski, Adam Sodal, Aneta Szulc, Krzysztof Lewandowski, Ewa Milosz, Marlena Robakowska, Boguslaw Szewczyk, Krystyna Bienkowska-Szewczyk                                                                                                                                                            |
| EPI_ISL_1096500, EPI_ISL_1096815, EPI_ISL_1096822, EPI_ISL_1096827                                                                                                                                                                                                                                                                                                                                                                                                                                                                                                                               | ASL Napoli 1 Centro                                                                                               | AMES Centro Poldiagnostico Strumentale S.r.l.                                                                                              | "Giovanni Savarese, Raffaella Ruggiero, Eloisa Evangelista, Antonella Di Carlo, Luisa Circelli, Luigi D'Amore, Roberto Sirica, Antonio Fico"                                                                                                                                                                                 |
| EPI_ISL_1097036, EPI_ISL_1097037, EPI_ISL_1097038, EPI_ISL_1097048, EPI_ISL_1097049, EPI_ISL_1097134, EPI_ISL_1097139, EPI_ISL_1097140, EPI_ISL_1097143, EPI_ISL_1097144, EPI_ISL_1097150, EPI_ISL_1097151, EPI_ISL_1097153, EPI_ISL_1097158, EPI_ISL_1097159, EPI_ISL_1097160, EPI_ISL_1097163, EPI_ISL_1097176, EPI_ISL_1097177, EPI_ISL_1097186, EPI_ISL_1097188, EPI_ISL_1097195, EPI_ISL_1097203, EPI_ISL_1097209                                                                                                                                                                           | Ministry of Health Turkey                                                                                         | Ministry of Health Turkey                                                                                                                  | Fatma Bayrakdar, Yasemin Cosgun, Suleyman Yalcin, Gulay Korukluoglu                                                                                                                                                                                                                                                          |
| EPI_ISL_1097585                                                                                                                                                                                                                                                                                                                                                                                                                                                                                                                                                                                  | Colorado Department of Public Health and Environment                                                              | Colorado Department of Puplic Health and Environment                                                                                       | Laura Bankers, Molly C. Hetherington-Rauth, Diana Ir, Shannon Ely, Shannon R. Matzinger, Sarah Elizabeth Totten, Emily A. Travanty                                                                                                                                                                                           |
| EPI_ISL_1097652                                                                                                                                                                                                                                                                                                                                                                                                                                                                                                                                                                                  | Eurofins Diatherix                                                                                                | Hudsonalpha Genome Sequencing Center                                                                                                       | Jane Grimwood, Melissa Williams, Lori H. Handley, Joshua Stough, Leslie Malone, Stefan Brzezinski, Ada Stewart, Teresa Jones, Jenell Webber, John Lovell, Jennifer Cart, and Jeremy Schmutz                                                                                                                                  |
| EPI_ISL_1097847, EPI_ISL_1097862, EPI_ISL_1097869, EPI_ISL_1097890, EPI_ISL_1097899, EPI_ISL_1097968, EPI_ISL_1097990, EPI_ISL_1097995, EPI_ISL_1098022, EPI_ISL_1098090, EPI_ISL_1098092, EPI_ISL_1098104, EPI_ISL_1098131, EPI_ISL_1098193, EPI_ISL_1098228, EPI_ISL_1098230, EPI_ISL_1098262, EPI_ISL_1098273, EPI_ISL_1098286, EPI_ISL_1098328, EPI_ISL_1098351, EPI_ISL_1098422, EPI_ISL_1098444, EPI_ISL_1098453, EPI_ISL_1098477, EPI_ISL_1098501, EPI_ISL_1098502, EPI_ISL_1098507, EPI_ISL_1098531, EPI_ISL_1098556, EPI_ISL_1098559, EPI_ISL_1098569, EPI_ISL_1098589, EPI_ISL_1098592 | see above                                                                                                         | Pandemic Response Lab - NYC                                                                                                                | Henry Lee, Michael Hammerling, Melissa Hopkins, Cybill del Castillo, Shinyoung Clair Kang, William Ward, Pradeep Bugga, Haiping Hao, Jon Laurent                                                                                                                                                                             |
| EPI_ISL_1098637                                                                                                                                                                                                                                                                                                                                                                                                                                                                                                                                                                                  | Flow Diagnostics Lab                                                                                              | Los Angeles County PHL                                                                                                                     | P. Hemarajata et al.                                                                                                                                                                                                                                                                                                         |
| EPI_ISL_1099086                                                                                                                                                                                                                                                                                                                                                                                                                                                                                                                                                                                  | Lighthouse Lab in Milton Keynes                                                                                   | Wellcome Sanger Institute for the COVID-19 Genomics UK (COG-UK) Consortium                                                                 | The Lighthouse Lab in Milton Keynes and Alex Alderton, Roberto Amato, Jeffrey Barrett, Sonia Goncalves, Ewan Harrison, David K. Jackson, Ian Johnston, Dominic Kwiatkowski, Cordelia Langford, John Sillitoe on behalf of the Wellcome Sanger Institute COVID-19 Surveillance Team                                           |
| EPI_ISL_1099260, EPI_ISL_1099461, EPI_ISL_1099600, EPI_ISL_1099701                                                                                                                                                                                                                                                                                                                                                                                                                                                                                                                               | Lighthouse Lab in Glasgow                                                                                         | Wellcome Sanger Institute for the COVID-19 Genomics UK (COG-UK) Consortium                                                                 | Harper VanSteenhouse, Yumi Kasai, David Gray, Carol Clugston, Anna Dominiczak and Alex Alderton, Roberto Amato, Jeffrey Barrett, Sonia Goncalves, Ewan Harrison, David K. Jackson, Ian Johnston, Dominic Kwiatkowski, Cordelia Langford, John Sillitoe on behalf of the Wellcome Sanger Institute COVID-19 Surveillance Team |
| EPI_ISL_1100113, EPI_ISL_1100146, EPI_ISL_1100251, EPI_ISL_1100354, EPI_ISL_1100611                                                                                                                                                                                                                                                                                                                                                                                                                                                                                                              | Lighthouse Lab in Alderley Park                                                                                   | Wellcome Sanger Institute for the COVID-19 Genomics UK (COG-UK) Consortium                                                                 | Jacquelyn Wynn, Mairead Hyland, The Lighthouse Lab in Alderley Park and Alex Alderton, Roberto Amato, Jeffrey Barrett, Sonia Goncalves, Ewan Harrison, David K. Jackson, Ian Johnston, Dominic Kwiatkowski, Cordelia Langford, John Sillitoe on behalf of the Wellcome Sanger Institute COVID-19 Surveillance Team           |
| EPI_ISL_1101167, EPI_ISL_1101198                                                                                                                                                                                                                                                                                                                                                                                                                                                                                                                                                                 | Lighthouse Lab in Milton Keynes                                                                                   | Wellcome Sanger Institute for the COVID-19 Genomics UK (COG-UK) Consortium                                                                 | The Lighthouse Lab in Milton Keynes and Alex Alderton, Roberto Amato, Jeffrey Barrett, Sonia Goncalves, Ewan Harrison, David K. Jackson, Ian Johnston, Dominic Kwiatkowski, Cordelia Langford, John Sillitoe on behalf of the Wellcome Sanger Institute COVID-19 Surveillance Team                                           |
| EPI_ISL_1101210, EPI_ISL_1101482                                                                                                                                                                                                                                                                                                                                                                                                                                                                                                                                                                 | Lighthouse Lab in Alderley Park                                                                                   | Wellcome Sanger Institute for the COVID-19 Genomics UK (COG-UK) Consortium                                                                 | Jacquelyn Wynn, Mairead Hyland, The Lighthouse Lab in Alderley Park and Alex Alderton, Roberto Amato, Jeffrey Barrett, Sonia Goncalves, Ewan Harrison, David K. Jackson, Ian Johnston, Dominic Kwiatkowski, Cordelia Langford, John Sillitoe on behalf of the Wellcome Sanger Institute COVID-19 Surveillance Team           |
| EPI_ISL_1101734, EPI_ISL_1102282                                                                                                                                                                                                                                                                                                                                                                                                                                                                                                                                                                 | Randox Laboratories                                                                                               | Wellcome Sanger Institute for the COVID-19 Genomics UK (COG-UK) Consortium                                                                 | Randox Laboratories and Alex Alderton, Roberto Amato, Jeffrey Barrett, Sonia Goncalves, Ewan Harrison, David K. Jackson, Ian Johnston, Dominic Kwiatkowski, Cordelia Langford, John Sillitoe on behalf of the Wellcome Sanger Institute COVID-19 Surveillance Team                                                           |
| EPI_ISL_1102477                                                                                                                                                                                                                                                                                                                                                                                                                                                                                                                                                                                  | Lighthouse Lab in Glasgow                                                                                         | Wellcome Sanger Institute for the COVID-19 Genomics UK (COG-UK) Consortium                                                                 | Harper VanSteenhouse, Yumi Kasai, David Gray, Carol Clugston, Anna Dominiczak and Alex Alderton, Roberto Amato, Jeffrey Barrett, Sonia Goncalves, Ewan Harrison, David K. Jackson, Ian Johnston, Dominic Kwiatkowski, Cordelia Langford, John Sillitoe on behalf of the Wellcome Sanger Institute COVID-19 Surveillance Team |
| EPI_ISL_1102744                                                                                                                                                                                                                                                                                                                                                                                                                                                                                                                                                                                  | Randox Laboratories                                                                                               | Wellcome Sanger Institute for the COVID-19 Genomics UK                                                                                     | Randox Laboratories and Alex Alderton, Roberto Amato, Jeffrey Barrett, Sonia Goncalves, Ewan Harrison, David K. Jackson, Ian Johnston, Dominic                                                                                                                                                                               |

|                                                                                     |                                                                                                                                  |                                                                                                                                            |                                                                                                                                                                                                                                                                                                                                                                                                                                                                                                                                                                                                 |
|-------------------------------------------------------------------------------------|----------------------------------------------------------------------------------------------------------------------------------|--------------------------------------------------------------------------------------------------------------------------------------------|-------------------------------------------------------------------------------------------------------------------------------------------------------------------------------------------------------------------------------------------------------------------------------------------------------------------------------------------------------------------------------------------------------------------------------------------------------------------------------------------------------------------------------------------------------------------------------------------------|
|                                                                                     |                                                                                                                                  | (COG-UK) Consortium                                                                                                                        | Kwiatkowski, Cordelia Langford, John Sillitoe on behalf of the Wellcome Sanger Institute COVID-19 Surveillance Team                                                                                                                                                                                                                                                                                                                                                                                                                                                                             |
| EPI_ISL_1103575                                                                     | AZ Klina                                                                                                                         | AZ Klina                                                                                                                                   | Dr. C. Vael                                                                                                                                                                                                                                                                                                                                                                                                                                                                                                                                                                                     |
| EPI_ISL_1104601                                                                     | University College London, Great Ormond Street Hospital for Children NHS Foundation Trust, Imperial College Healthcare NHS Trust | COVID-19 Genomics UK (COG-UK) Consortium                                                                                                   | Sergi Castellano, Rachel Williams, Mark Kristiansen, Paola Resende Silva, Sunando Roy, Tony Brooks, Helena Tutill, Paola Niola, Patricia Dyal, Charlotte Williams, Leysa Forrest, Yasmin Panchbhaya, Jacqueline Findlay, Samuel Weeks, Julianne Brown, Kathryn Harris, Paul Randell, James Price, Alison Holmes, Judith Breuer                                                                                                                                                                                                                                                                  |
| EPI_ISL_1104870, EPI_ISL_1104996, EPI_ISL_1105104                                   | University College London Hospital                                                                                               | COVID-19 Genomics UK (COG-UK) Consortium                                                                                                   | Judith Heaney, Matthew Byott, Catherine Houlihan, Dan Frampton, Stuart Kirk, Moira Spyer and Eleni Nastouli                                                                                                                                                                                                                                                                                                                                                                                                                                                                                     |
| EPI_ISL_1105897                                                                     | Lincolnshire Hospitals and DeepSeq Nottingham                                                                                    | COVID-19 Genomics UK (COG-UK) Consortium                                                                                                   | Nichola Duckworth, Tim Sloan, Sarah Walsh, Jonathan Ball, Patrick McClure, Joeseoph Chappell, Nadine Holmes, Matthew Carlisle, Christopher Moore, Fei Sang, Johnny Debebe, Victoria Wright, Matthew Loose                                                                                                                                                                                                                                                                                                                                                                                       |
| EPI_ISL_1107009, EPI_ISL_1107022                                                    | Wales Specialist Virology Centre Sequencing lab: Pathogen Genomics Unit                                                          | Public Health Wales Microbiology Cardiff Wales Specialist Virology Centre                                                                  | Catherine Moore, Johnathan Evans, Laura Gifford, Malorie Perry, Simon Cottrell, Angela Marchbank, Alec Birchley, Alexander Adams, Amy Gaskin, Bree Gatica-Wilcox, Jason Coombes, Joel Southgate, Lauren Gilbert, Lee Graham, Nicole Pacchiarini, Sara Kumziene-Summerhayes, Sarah Taylor, Sophie Jones, Sara Rey, Matthew Bull, Joanne Watkins, Sally Corden, Tom Connor                                                                                                                                                                                                                        |
| EPI_ISL_1108054                                                                     | Quadram Institute Bioscience                                                                                                     | COVID-19 Genomics UK (COG-UK) Consortium                                                                                                   | Dave J. Baker, Gemma L. Kay, Alp Aydin, Thanh Le-Viet, Steven Rudder, Ana P. Tedim, Anastasia Kolyva, Maria Diaz, Leonardo de Oliveira Martins, Nabil-Fareed Alikhan, Lizzie Meadows, Rachael Stanley, Ngozi Elumogo, Muhammed Yasir, Nicholas M. Thomson, Alexander J Trotter, Rachel Gilroy, Samuel Bloomfield, Claire Stuart, Andrew Bell, Reenesh Prakash, Samir Derwisevic, Alison E. Mather, John Wain, Mark Webber, Andrew J. Page, Justin O'Grady                                                                                                                                       |
| EPI_ISL_1109239                                                                     | Centre for Enzyme Innovation, University of Portsmouth / Translational Research Laboratory, Portsmouth Hospitals NHS Trust       | COVID-19 Genomics UK (COG-UK) Consortium                                                                                                   | Angela Beckett, Salman Goudarzi, Christopher Fearn, Kate Cook, Katie Loveson, Sharon Glaysher, Scott Elliott, Samuel Robson                                                                                                                                                                                                                                                                                                                                                                                                                                                                     |
| EPI_ISL_1109494                                                                     | University Hospital for Infectious Diseases                                                                                      | Croatian Institute of Public Health                                                                                                        | Irena Tabain, Ivana Ferenak                                                                                                                                                                                                                                                                                                                                                                                                                                                                                                                                                                     |
| EPI_ISL_1109495                                                                     | Croatian Institute of Public Health                                                                                              | Croatian Institute of Public Health                                                                                                        | Irena Tabain, Ivana Ferenak                                                                                                                                                                                                                                                                                                                                                                                                                                                                                                                                                                     |
| EPI_ISL_1109503                                                                     | Public Health Institute of Šibenik-Knin County                                                                                   | Croatian Institute of Public Health                                                                                                        | Irena Tabain, Ivana Ferenak                                                                                                                                                                                                                                                                                                                                                                                                                                                                                                                                                                     |
| EPI_ISL_1109582                                                                     | SC (UCO) Igiene e Sanità Pubblica (funzione integrata con SC Microbiologia e Virologia)                                          | ARGO Laboratorio Genomica ed Epigenomica                                                                                                   | Licastro D, Dal Monego S, Degasperi M, Marcello A, D'Agaro P, Lombardo F                                                                                                                                                                                                                                                                                                                                                                                                                                                                                                                        |
| EPI_ISL_1109589                                                                     | SC (UCO) Igiene e Sanità Pubblica (funzione integrata con SC Microbiologia e Virologia) e Az. Ospedaliero-Universitaria Udine    | ARGO Laboratorio Genomica ed Epigenomica                                                                                                   | Licastro D, Dal Monego S, Degasperi M, Marcello A, D'Agaro P, Pipan C                                                                                                                                                                                                                                                                                                                                                                                                                                                                                                                           |
| EPI_ISL_1109640                                                                     | Althaia. Xarxa Assistencial Universitària de Manresa                                                                             | IrsiCaixa - Can Ruti CovidSeq                                                                                                              | Marc Noguera-Julian, Mariona Parera, Maria Casadellà, Pilar Armengol, Francesc Catala-Moll, Roger Paredes, Bonaventura Clotet Gloria Trujillo, Rafel Perez Vidal, Jaume Trape Pujol, Carolina Gonzalez Fernandez, Roger Paredes, Eulalia Grau, Bonaventura Clotet                                                                                                                                                                                                                                                                                                                               |
| EPI_ISL_1109815                                                                     | Lab voor klinische biologie                                                                                                      | Lab voor klinische biologie                                                                                                                | Marija Janevska, Hannelore Hamerlinck, Bruno Verhasselt                                                                                                                                                                                                                                                                                                                                                                                                                                                                                                                                         |
| EPI_ISL_1110021                                                                     | MEPHI, Aix Marseille University                                                                                                  | MEPHI, Aix Marseille University                                                                                                            | Anthony LEVASSEUR                                                                                                                                                                                                                                                                                                                                                                                                                                                                                                                                                                               |
| EPI_ISL_1110142                                                                     | Groupe LCD                                                                                                                       | Department of Virology, Henri Mondor University Hospital, Assistance Publique Hôpitaux de Paris, Université Paris-Est Créteil, INSERM U955 | Christophe Rodriguez, Slim Fourati, Vanessa Demontant, Guillaume Gricourt, Melissa N'Debi, Alexandre Soulier, Elisabeth Trawinski, Jean-Michel Pawlatsky                                                                                                                                                                                                                                                                                                                                                                                                                                        |
| EPI_ISL_1110212                                                                     | Hôpital Avicenne                                                                                                                 | Department of Virology, Henri Mondor University Hospital, Assistance Publique Hôpitaux de Paris, Université Paris-Est Créteil, INSERM U955 | Christophe Rodriguez, Slim Fourati, Vanessa Demontant, Guillaume Gricourt, Melissa N'Debi, Alexandre Soulier, Elisabeth Trawinski, Jean-Michel Pawlatsky                                                                                                                                                                                                                                                                                                                                                                                                                                        |
| EPI_ISL_1110319, EPI_ISL_1110335, EPI_ISL_1110345, EPI_ISL_1110354                  | Azienda Sanitaria dell'Alto Adige Laboratorio Aziendale di Microbiologia e Virologia                                             | Istituto di Genomica Applicata                                                                                                             | Elisabetta Pagani, Irene Bianconi, Elisabetta Giacobazzi, Elisa Masi, Stefanie Wieser, Irena Jurman, Vera Vendramin, Gabriele Magris, Eleonora Paparelli, Davide Scaglione, Michele Morgante                                                                                                                                                                                                                                                                                                                                                                                                    |
| EPI_ISL_1110395                                                                     | Hopital                                                                                                                          | National Reference Center for Viruses of Respiratory Infections, Institut Pasteur, Paris                                                   | Marion Barbet, Sylvie Behillil, Méline Bizard, Angela Brisebarre, Camille Capel, Etienne Simon-Lorière, Vincent Enouf, Maud Vanpeene, Sylvie van der Werf, Gros Isabelle                                                                                                                                                                                                                                                                                                                                                                                                                        |
| EPI_ISL_1110406                                                                     | Hopital                                                                                                                          | National Reference Center for Viruses of Respiratory Infections, Institut Pasteur, Paris                                                   | Marion Barbet, Sylvie Behillil, Méline Bizard, Angela Brisebarre, Camille Capel, Etienne Simon-Lorière, Vincent Enouf, Maud Vanpeene, Sylvie van der Werf, Andre-Garnier Elisabeth                                                                                                                                                                                                                                                                                                                                                                                                              |
| EPI_ISL_1110409                                                                     | Hopital                                                                                                                          | National Reference Center for Viruses of Respiratory Infections, Institut Pasteur, Paris                                                   | Marion Barbet, Sylvie Behillil, Méline Bizard, Angela Brisebarre, Camille Capel, Etienne Simon-Lorière, Vincent Enouf, Maud Vanpeene, Sylvie van der Werf, Morvan Pauline                                                                                                                                                                                                                                                                                                                                                                                                                       |
| EPI_ISL_1110412                                                                     | Hopital                                                                                                                          | National Reference Center for Viruses of Respiratory Infections, Institut Pasteur, Paris                                                   | Marion Barbet, Sylvie Behillil, Méline Bizard, Angela Brisebarre, Camille Capel, Etienne Simon-Lorière, Vincent Enouf, Maud Vanpeene, Sylvie van der Werf, Pilorge LéA                                                                                                                                                                                                                                                                                                                                                                                                                          |
| EPI_ISL_1110418                                                                     | Hopital                                                                                                                          | National Reference Center for Viruses of Respiratory Infections, Institut Pasteur, Paris                                                   | Marion Barbet, Sylvie Behillil, Méline Bizard, Angela Brisebarre, Camille Capel, Etienne Simon-Lorière, Vincent Enouf, Maud Vanpeene, Sylvie van der Werf, Guinoiseau Thibault                                                                                                                                                                                                                                                                                                                                                                                                                  |
| EPI_ISL_1110423                                                                     | Labo Analyses Med                                                                                                                | National Reference Center for Viruses of Respiratory Infections, Institut Pasteur, Paris                                                   | Marion Barbet, Sylvie Behillil, Méline Bizard, Angela Brisebarre, Camille Capel, Etienne Simon-Lorière, Vincent Enouf, Maud Vanpeene, Sylvie van der Werf,                                                                                                                                                                                                                                                                                                                                                                                                                                      |
| EPI_ISL_1110424, EPI_ISL_1110427                                                    | Labo Analyses Med                                                                                                                | National Reference Center for Viruses of Respiratory Infections, Institut Pasteur, Paris                                                   | Marion Barbet, Sylvie Behillil, Méline Bizard, Angela Brisebarre, Camille Capel, Etienne Simon-Lorière, Vincent Enouf, Maud Vanpeene, Sylvie van der Werf, Holstein Anne                                                                                                                                                                                                                                                                                                                                                                                                                        |
| EPI_ISL_1110555, EPI_ISL_1110557                                                    | Kansas Health and Environmental Lab                                                                                              | Kansas Health and Environmental Lab                                                                                                        | Mike Grose, Paige Drury, Carissa Robertson, Ben Olsen, and Phil Adam                                                                                                                                                                                                                                                                                                                                                                                                                                                                                                                            |
| EPI_ISL_1110652, EPI_ISL_1110655, EPI_ISL_1110657, EPI_ISL_1110661, EPI_ISL_1110665 | Helix/Illumina                                                                                                                   | Respiratory Viruses Branch, Division of Viral Diseases, Centers for Disease Control and Prevention                                         | Peter W. Cook, Dakota Howard, Dhvani Batra, Ben L. Rambo-Martin, Eileen de Feo, Jan Antico, Christine Tran, Matthew Tolentino, Shannon Wickline, Kim Gletzen, Brad Sickler, Jingtao Liu, Eric Allen, Phil Febbo, Summer Galloway, Nicole L. Washington, Simon White, Geraint Levan, Kelly Schiabor Barrett, Elizabeth Cirulli, Alexandre Bolze, Ary Ascencio, Charlotte Rivera-Garcia, Ryan Cho, Jason Nguyen, Sherry Wang, Jimmy Ramirez, Tyler Cassens, Effen Sandoval, Magnus Isaksson, William Lee, David Becker, Marc Laurent, James Lu, Clinton R. Paden, Suxiang Tong, Duncan MacCannell |
| EPI_ISL_1110753                                                                     | Public Health Institute of Varaždin County                                                                                       | Croatian Institute of Public Health                                                                                                        | Irena Tabain, Ivana Ferenak                                                                                                                                                                                                                                                                                                                                                                                                                                                                                                                                                                     |
| EPI_ISL_1110808, EPI_ISL_1110814, EPI_ISL_1110815                                   | Croatian Institute of Public Health                                                                                              | Croatian Institute of Public Health                                                                                                        | Irena Tabain, Ivana Ferenak                                                                                                                                                                                                                                                                                                                                                                                                                                                                                                                                                                     |
| EPI_ISL_1110884, EPI_ISL_1110900                                                    | Hopital                                                                                                                          | National Reference Center for Viruses of Respiratory Infections, Institut Pasteur, Paris                                                   | Marion Barbet, Sylvie Behillil, Méline Bizard, Angela Brisebarre, Camille Capel, Etienne Simon-Lorière, Vincent Enouf, Maud Vanpeene, Sylvie van der Werf, Pilorge LéA                                                                                                                                                                                                                                                                                                                                                                                                                          |
| EPI_ISL_1110913                                                                     | Hopital                                                                                                                          | National Reference Center for Viruses of Respiratory Infections, Institut Pasteur, Paris                                                   | Marion Barbet, Sylvie Behillil, Méline Bizard, Angela Brisebarre, Camille Capel, Etienne Simon-Lorière, Vincent Enouf, Maud Vanpeene, Sylvie van der Werf, Gastli Nabil                                                                                                                                                                                                                                                                                                                                                                                                                         |
| EPI_ISL_1112227                                                                     | Istituto Zooprofilattico Sperimentale della Puglia e della Basilicata                                                            | Istituto Zooprofilattico Sperimentale della Puglia e della Basilicata                                                                      | Parisi A., Bianco A., Capozzi L., Del Sambro L., Simone D., Giannico A., Ridolfi D.                                                                                                                                                                                                                                                                                                                                                                                                                                                                                                             |
| EPI_ISL_1112260, EPI_ISL_1112281, EPI_ISL_1112291                                   | Dipartimento di Scienze Biomediche e Oncologia Umana - Azienda Ospedaliero Universitaria Consorziata Policlinico                 | Istituto Zooprofilattico Sperimentale della Puglia e della Basilicata                                                                      | Parisi A., Bianco A., Capozzi L., Del Sambro L., Simone D., Chironna M., Loconsole D., Sallustio A.                                                                                                                                                                                                                                                                                                                                                                                                                                                                                             |
| EPI_ISL_1113087, EPI_ISL_1113088                                                    | CHR de La Citadelle                                                                                                              | GIGA Medical Genomics                                                                                                                      | Keith Durkin, Maria Artesi, Sébastien Bontems, Raphaël Boreux, Bouchra Boujemla, Nathalie Renotte, Cécile Meex, Pierrette Melin, Marie-Pierre Hayette, Vincent Bours                                                                                                                                                                                                                                                                                                                                                                                                                            |



|                                                                                                                                                         |                                                                                                    |                                                                                                        |                                                                                                                                                                                                                                                                                                                                                                                                                                                                                                                                                                                                                                                                                                                                                                    |
|---------------------------------------------------------------------------------------------------------------------------------------------------------|----------------------------------------------------------------------------------------------------|--------------------------------------------------------------------------------------------------------|--------------------------------------------------------------------------------------------------------------------------------------------------------------------------------------------------------------------------------------------------------------------------------------------------------------------------------------------------------------------------------------------------------------------------------------------------------------------------------------------------------------------------------------------------------------------------------------------------------------------------------------------------------------------------------------------------------------------------------------------------------------------|
| EPI_ISL_1113122                                                                                                                                         | SYNLAB - Laboratoire J. Collard                                                                    | GIGA Medical Genomics                                                                                  | Keith Durkin, Maria Artesi, Sébastien Bontems, Raphaël Boreux, Bouchra Boujemla, Nathalie Renotte, Cécile Meex, Pierrette Melin, Marie-Pierre Hayette, Vincent Bours                                                                                                                                                                                                                                                                                                                                                                                                                                                                                                                                                                                               |
| EPI_ISL_1114323, EPI_ISL_1114346                                                                                                                        | Alius Institute for Biomedical Sciences                                                            | Seattle Flu Study                                                                                      | Deborah A. Nickerson, Chris D. Frazier, Jover Lee, Benjamin Pelle, Erica Ryke, Matthew Richardson, Amanda Adler, Elisabeth Brandstetter, Peter D. Han, Kairsten Fay, Misja Ilcisin, Kirsten Lacombe, Thomas R. Sibley, Melissa Truong, Caitlin R. Wolf, Ryan Alexander, Daniel Bates, Rebecca Bruders, Stephanie DeBaun, Clem Green, Muhammad Halimun, Jessica Halow, Kneshay Harper, Matt Hartman, Andrew Meuser, Alex Nguyen, Truong Nguyen, Sofia Olsson, Sadie Patraw, Hannah Petersen, Tobias Ragoczy, Joshua Richards, Jacob Rodriguez, John Stamatoyannopoulos, Julia Wald, Olivia Waltner, Michael Boeckh, Janet A. Englund, Michael Famulare, Barry R. Lutz, Mark J. Rieder, Lea M. Starita, Matthew Thompson, Helen Y. Chu, Jay Shendure, Trevor Bedford |
| EPI_ISL_1114492                                                                                                                                         | Department of Health and Mental Hygiene Central Harlem                                             | New York City Public Health Laboratory                                                                 | Jade Wang, et al.                                                                                                                                                                                                                                                                                                                                                                                                                                                                                                                                                                                                                                                                                                                                                  |
| EPI_ISL_1114503                                                                                                                                         | Department of Health and Mental Hygiene Riverside                                                  | New York City Public Health Laboratory                                                                 | Jade Wang, et al.                                                                                                                                                                                                                                                                                                                                                                                                                                                                                                                                                                                                                                                                                                                                                  |
| EPI_ISL_1114506                                                                                                                                         | Department of Health and Mental Hygiene Corona                                                     | New York City Public Health Laboratory                                                                 | Jade Wang, et al.                                                                                                                                                                                                                                                                                                                                                                                                                                                                                                                                                                                                                                                                                                                                                  |
| EPI_ISL_1114808                                                                                                                                         | Lighthouse Lab in Glasgow                                                                          | Wellcome Sanger Institute for the COVID-19 Genomics UK (COG-UK) Consortium                             | Harper VanSteenhouse, Yumi Kasai, David Gray, Carol Clugston, Anna Dominiczak and Alex Alderton, Roberto Amato, Jeffrey Barrett, Sonia Goncalves, Ewan Harrison, David K. Jackson, Ian Johnston, Dominic Kwiatkowski, Cordelia Langford, John Sillitoe on behalf of the Wellcome Sanger Institute COVID-19 Surveillance Team                                                                                                                                                                                                                                                                                                                                                                                                                                       |
| EPI_ISL_1114886                                                                                                                                         | Lighthouse Lab in Milton Keynes                                                                    | Wellcome Sanger Institute for the COVID-19 Genomics UK (COG-UK) Consortium                             | The Lighthouse Lab in Milton Keynes and Alex Alderton, Roberto Amato, Jeffrey Barrett, Sonia Goncalves, Ewan Harrison, David K. Jackson, Ian Johnston, Dominic Kwiatkowski, Cordelia Langford, John Sillitoe on behalf of the Wellcome Sanger Institute COVID-19 Surveillance Team                                                                                                                                                                                                                                                                                                                                                                                                                                                                                 |
| EPI_ISL_1114903                                                                                                                                         | Lighthouse Lab in Alderley Park                                                                    | Wellcome Sanger Institute for the COVID-19 Genomics UK (COG-UK) Consortium                             | Jacquelyn Wynn, Mairead Hyland, The Lighthouse Lab in Alderley Park and Alex Alderton, Roberto Amato, Jeffrey Barrett, Sonia Goncalves, Ewan Harrison, David K. Jackson, Ian Johnston, Dominic Kwiatkowski, Cordelia Langford, John Sillitoe on behalf of the Wellcome Sanger Institute COVID-19 Surveillance Team                                                                                                                                                                                                                                                                                                                                                                                                                                                 |
| EPI_ISL_1115075                                                                                                                                         | Lighthouse Lab in Milton Keynes                                                                    | Wellcome Sanger Institute for the COVID-19 Genomics UK (COG-UK) Consortium                             | The Lighthouse Lab in Milton Keynes and Alex Alderton, Roberto Amato, Jeffrey Barrett, Sonia Goncalves, Ewan Harrison, David K. Jackson, Ian Johnston, Dominic Kwiatkowski, Cordelia Langford, John Sillitoe on behalf of the Wellcome Sanger Institute COVID-19 Surveillance Team                                                                                                                                                                                                                                                                                                                                                                                                                                                                                 |
| EPI_ISL_1115154, EPI_ISL_1115180, EPI_ISL_1115196, EPI_ISL_1115555                                                                                      | Lighthouse Lab in Glasgow                                                                          | Wellcome Sanger Institute for the COVID-19 Genomics UK (COG-UK) Consortium                             | Harper VanSteenhouse, Yumi Kasai, David Gray, Carol Clugston, Anna Dominiczak and Alex Alderton, Roberto Amato, Jeffrey Barrett, Sonia Goncalves, Ewan Harrison, David K. Jackson, Ian Johnston, Dominic Kwiatkowski, Cordelia Langford, John Sillitoe on behalf of the Wellcome Sanger Institute COVID-19 Surveillance Team                                                                                                                                                                                                                                                                                                                                                                                                                                       |
| EPI_ISL_1115593                                                                                                                                         | Lighthouse Lab in Cambridge                                                                        | Wellcome Sanger Institute for the COVID-19 Genomics UK (COG-UK) Consortium                             | Rob Howes, The Lighthouse Lab in Cambridge and Alex Alderton, Roberto Amato, Jeffrey Barrett, Sonia Goncalves, Ewan Harrison, David K. Jackson, Ian Johnston, Dominic Kwiatkowski, Cordelia Langford, John Sillitoe on behalf of the Wellcome Sanger Institute COVID-19 Surveillance Team                                                                                                                                                                                                                                                                                                                                                                                                                                                                          |
| EPI_ISL_1115728, EPI_ISL_1115827, EPI_ISL_1115873                                                                                                       | Randox Laboratories                                                                                | Wellcome Sanger Institute for the COVID-19 Genomics UK (COG-UK) Consortium                             | Randox Laboratories and Alex Alderton, Roberto Amato, Jeffrey Barrett, Sonia Goncalves, Ewan Harrison, David K. Jackson, Ian Johnston, Dominic Kwiatkowski, Cordelia Langford, John Sillitoe on behalf of the Wellcome Sanger Institute COVID-19 Surveillance Team                                                                                                                                                                                                                                                                                                                                                                                                                                                                                                 |
| EPI_ISL_1115984                                                                                                                                         | Lighthouse Lab in Glasgow                                                                          | Wellcome Sanger Institute for the COVID-19 Genomics UK (COG-UK) Consortium                             | Harper VanSteenhouse, Yumi Kasai, David Gray, Carol Clugston, Anna Dominiczak and Alex Alderton, Roberto Amato, Jeffrey Barrett, Sonia Goncalves, Ewan Harrison, David K. Jackson, Ian Johnston, Dominic Kwiatkowski, Cordelia Langford, John Sillitoe on behalf of the Wellcome Sanger Institute COVID-19 Surveillance Team                                                                                                                                                                                                                                                                                                                                                                                                                                       |
| EPI_ISL_1116196, EPI_ISL_1116211                                                                                                                        | Randox Laboratories                                                                                | Wellcome Sanger Institute for the COVID-19 Genomics UK (COG-UK) Consortium                             | Randox Laboratories and Alex Alderton, Roberto Amato, Jeffrey Barrett, Sonia Goncalves, Ewan Harrison, David K. Jackson, Ian Johnston, Dominic Kwiatkowski, Cordelia Langford, John Sillitoe on behalf of the Wellcome Sanger Institute COVID-19 Surveillance Team                                                                                                                                                                                                                                                                                                                                                                                                                                                                                                 |
| EPI_ISL_1116429, EPI_ISL_1116432, EPI_ISL_1116439, EPI_ISL_1116448, EPI_ISL_1116453                                                                     | National Institute of Infectious Diseases-Prof. Dr. Matei Bals Molecular Diagnostics Laboratory    | National Institute of Infectious Diseases-Prof. Dr. Matei Bals Molecular Diagnostics Laboratory        | Leontina Banica, Marius Surleac, Corina Casangiu, Petre Milu, Andreea Tudor, Simona Paraschiv, Dan Otelea                                                                                                                                                                                                                                                                                                                                                                                                                                                                                                                                                                                                                                                          |
| EPI_ISL_1116460                                                                                                                                         | County Emergency Clinical Hospital of Tg. Mures                                                    | National Institute of Infectious Diseases-Prof. Dr. Matei Bals Molecular Diagnostics Laboratory        | Leontina Banica, Marius Surleac, Corina Casangiu, Petre Milu, Andreea Tudor, Simona Paraschiv, Dan Otelea                                                                                                                                                                                                                                                                                                                                                                                                                                                                                                                                                                                                                                                          |
| EPI_ISL_1116461                                                                                                                                         | County Emergency Clinical Hospital of Targu Mures                                                  | National Institute of Infectious Diseases-Prof. Dr. Matei Bals Molecular Diagnostics Laboratory        | Leontina Banica, Marius Surleac, Corina Casangiu, Petre Milu, Andreea Tudor, Simona Paraschiv, Dan Otelea                                                                                                                                                                                                                                                                                                                                                                                                                                                                                                                                                                                                                                                          |
| EPI_ISL_1116486, EPI_ISL_1116489, EPI_ISL_1116491, EPI_ISL_1116492, EPI_ISL_1116493, EPI_ISL_1116494, EPI_ISL_1116495, EPI_ISL_1116497, EPI_ISL_1116499 | NYU Langone Health                                                                                 | Departments of Pathology and Medicine, New York University School of Medicine                          | Adriana Heguy, Dacia Dimartino, Emily Guzman, Christian Marier, Peter Meyn, Sitharam Ramaswami, Gael Westby, Paul Zappile, Yutong Zhang, Paolo Cotzia, Guiqing Wang                                                                                                                                                                                                                                                                                                                                                                                                                                                                                                                                                                                                |
| EPI_ISL_1116655                                                                                                                                         | Instituto Nacional de Saude (INSA)                                                                 | Instituto Nacional de Saude (INSA)                                                                     | Borges et al                                                                                                                                                                                                                                                                                                                                                                                                                                                                                                                                                                                                                                                                                                                                                       |
| EPI_ISL_1116826, EPI_ISL_1116831                                                                                                                        | Instituto Nacional de Saude (INSA) and Instituto Gulbenkian de Ciencia (IGC)                       | Instituto Nacional de Saude (INSA) and Instituto Gulbenkian de Ciencia (IGC)                           | Borges et al                                                                                                                                                                                                                                                                                                                                                                                                                                                                                                                                                                                                                                                                                                                                                       |
| EPI_ISL_1116912, EPI_ISL_1116919, EPI_ISL_1116931, EPI_ISL_1116936                                                                                      | Instituto Nacional de Saude (INSA)                                                                 | Instituto Nacional de Saude (INSA)                                                                     | Borges et al                                                                                                                                                                                                                                                                                                                                                                                                                                                                                                                                                                                                                                                                                                                                                       |
| EPI_ISL_1116950                                                                                                                                         | Instituto Nacional de Saude (INSA) and Instituto Gulbenkian de Ciencia (IGC)                       | Instituto Nacional de Saude (INSA) and Instituto Gulbenkian de Ciencia (IGC)                           | Borges et al                                                                                                                                                                                                                                                                                                                                                                                                                                                                                                                                                                                                                                                                                                                                                       |
| EPI_ISL_1117026                                                                                                                                         | Instituto Nacional de Saude (INSA)                                                                 | Instituto Nacional de Saude (INSA)                                                                     | Borges et al                                                                                                                                                                                                                                                                                                                                                                                                                                                                                                                                                                                                                                                                                                                                                       |
| EPI_ISL_1117498                                                                                                                                         | PRESIDIO TERRITORIALE CASOLI                                                                       | Istituto Zooprofilattico Sperimentale dell'Abruzzo e Molise "G. Caporale"                              | Lorusso A, Marcacci M, Di Domenico M, Ancora M, Curini V, Mangone I, Rinaldi A, Scialabba S, Di Pasquale A, Cammà C, Scialabba S, Puglia I, Calistri P, Savini G                                                                                                                                                                                                                                                                                                                                                                                                                                                                                                                                                                                                   |
| EPI_ISL_1117503                                                                                                                                         | SIESP DIP PREV TERAMO                                                                              | Istituto Zooprofilattico Sperimentale dell'Abruzzo e Molise "G. Caporale"                              | Lorusso A, Marcacci M, Di Domenico M, Ancora M, Curini V, Mangone I, Rinaldi A, Scialabba S, Di Pasquale A, Cammà C, Scialabba S, Puglia I, Calistri P, Savini G                                                                                                                                                                                                                                                                                                                                                                                                                                                                                                                                                                                                   |
| EPI_ISL_1117547                                                                                                                                         | Hospital Universitari Joan XXIII de Tarragona                                                      | Hospital Universitari Vall d'Hebron - Vall d'Hebron Institut de Recerca                                | Cristina Andrés, Maria Piñana, Josep F Abril, Damir Garcia-Cehic, Ariadna Rando, Juliana Esperalba, Maria Gema Codina, Carla Castillo, Maria Carmen Martin, Tomás Pumarola, Josep Quer, Andrés Antón                                                                                                                                                                                                                                                                                                                                                                                                                                                                                                                                                               |
| EPI_ISL_1117678                                                                                                                                         | SIESP CHIETI, DRIVE IN VASTO                                                                       | Istituto Zooprofilattico Sperimentale dell'Abruzzo e Molise "G. Caporale"                              | Lorusso A, Marcacci M, Di Domenico M, Ancora M, Curini V, Mangone I, Rinaldi A, Scialabba S, Di Pasquale A, Cammà C, Puglia I, Calistri P, Savini G                                                                                                                                                                                                                                                                                                                                                                                                                                                                                                                                                                                                                |
| EPI_ISL_1117849                                                                                                                                         | Center for Virology, Medical University of Vienna                                                  | Bergthaler laboratory, CeMM Research Center for Molecular Medicine of the Austrian Academy of Sciences | Lukas Enderl, Anna Schedl, Thomas Penz, Benedikt Agerer, Maelle Le Moing, Michael Schuster, Bekir Erguner, Jan Laine, Martin Senekowitsch, Christoph Bock, Andreas Bergthaler                                                                                                                                                                                                                                                                                                                                                                                                                                                                                                                                                                                      |
| EPI_ISL_1117872                                                                                                                                         | HG Pharma GmbH                                                                                     | Bergthaler laboratory, CeMM Research Center for Molecular Medicine of the Austrian Academy of Sciences | Lukas Enderl, Anna Schedl, Thomas Penz, Benedikt Agerer, Maelle Le Moing, Michael Schuster, Bekir Erguner, Jan Laine, Martin Senekowitsch, Christoph Bock, Andreas Bergthaler                                                                                                                                                                                                                                                                                                                                                                                                                                                                                                                                                                                      |
| EPI_ISL_1118167, EPI_ISL_1118168, EPI_ISL_1118169                                                                                                       | LAB ANALISI PO CARDARELLI CAMPOBASSO                                                               | Istituto Zooprofilattico Sperimentale dell'Abruzzo e Molise "G. Caporale"                              | Scutellà M, Niro G, Felice V. Lorusso A, Marcacci M, Di Domenico M, Ancora M, Curini V, Mangone I, Rinaldi A, Scialabba S, Di Pasquale A, Cammà C, Puglia I, Calistri P, Savini G                                                                                                                                                                                                                                                                                                                                                                                                                                                                                                                                                                                  |
| EPI_ISL_1118302                                                                                                                                         | University Hospital of Northern Norway, Department for Microbiology and Infectious Disease Control | Norwegian Institute of Public Health, Department of Virology                                           | Kathrine Stene-Johansen, Kamilla Heddeland Instefjord, Hilde Elshaug, Garcia Lorente Ignacio, Engebretsen Serina Beate, Pedersen Benedikte Nevjen, Debech Nadia, Atiya R Ali, Marie Paulsen Madsen, Rasmus Riis Kopperud, Hilde Vollan, Karoline Bragstad, Olav Hungnes                                                                                                                                                                                                                                                                                                                                                                                                                                                                                            |
| EPI_ISL_1118933                                                                                                                                         | National Institute of Health Research and Development                                              | National Institute of Health Research and Development                                                  | Hana Apsari Pawestri, Subangkti, Kartika Dewi Puspa, Arie Ardiansyah Nugraha, Hartanti Dian Ikawati, Krisna Nur Andriana Pangesti, Yuni Rukminiati, Ririn Ramadhany, Agustningsih, Kindi Adam, Holy Arif Wibowo, Triyani Soekarso, Ni Ketut Susilarini, Nurika Hariastuti, Ully Alfi Nikmah, Reni Herman, Nike Susanti, Herna, Tati Febriyanti, Natalie Laurencia Kipuw, Fauzul Muna, Irene Lorinda Indalao, Nelly Puspandari, Vivi Setiawaty                                                                                                                                                                                                                                                                                                                      |

|                                                                                                      |                                                                                                                                          |                                                                                                                                                        |                                                                                                                                                                                                                                                                                                                                                                                                                                                                          |
|------------------------------------------------------------------------------------------------------|------------------------------------------------------------------------------------------------------------------------------------------|--------------------------------------------------------------------------------------------------------------------------------------------------------|--------------------------------------------------------------------------------------------------------------------------------------------------------------------------------------------------------------------------------------------------------------------------------------------------------------------------------------------------------------------------------------------------------------------------------------------------------------------------|
| EPI_ISL_1119043                                                                                      | Viollier AG                                                                                                                              | Department of Biosystems Science and Engineering, ETH Zürich                                                                                           | Chaoran Chen, Sarah Nadeau, Ivan Topolsky, Emmanouil Dermitzakis, Keith Harshman, Ioannis Xenarios, Henri Pegeot, Lorenzo Cerutti, Deborah Penet, Philipp Jablonski, Lara Fuhrmann, David Dreifuss, Katharina Jahn, Christiane Beckmann, Maurice Redondo, Olivier Kobel, Christoph Noppen, Sophie Seidel, Noemie Santamaria de Souza, Niko Beerenwinkel, Tanja Stadler                                                                                                   |
| EPI_ISL_1119064, EPI_ISL_1119185                                                                     | Viollier AG                                                                                                                              | Department of Biosystems Science and Engineering, ETH Zürich                                                                                           | Christian Beisel, Sarah Nadeau, Chaoran Chen, Ivan Topolsky, Philipp Jablonski, Lara Fuhrmann, David Dreifuss, Katharina Jahn, Rebecca Denes, Mirjam Feldkamp, Ina Nissen, Natascha Santacroce, Elodie Burcklen, Christiane Beckmann, Maurice Redondo, Olivier Kobel, Christoph Noppen, Sophie Seidel, Noemie Santamaria de Souza, Niko Beerenwinkel, Tanja Stadler                                                                                                      |
| EPI_ISL_1120835                                                                                      | CHUV                                                                                                                                     | Laboratory of genomics and metagenomics, Institute of Microbiology, University Hospital Centre and University of Lausanne, Switzerland                 | Trestan Pilonel, Damien Jacot, Sébastien Aeby, Gilbert Greub, Claire Bertelli                                                                                                                                                                                                                                                                                                                                                                                            |
| EPI_ISL_1120836                                                                                      | EHNV                                                                                                                                     | Laboratory of genomics and metagenomics, Institute of Microbiology, University Hospital Centre and University of Lausanne, Switzerland                 | Trestan Pilonel, Damien Jacot, Sébastien Aeby, Gilbert Greub, Claire Bertelli                                                                                                                                                                                                                                                                                                                                                                                            |
| EPI_ISL_1120856                                                                                      | UNILABS - LAUSANNE                                                                                                                       | Laboratory of genomics and metagenomics, Institute of Microbiology, University Hospital Centre and University of Lausanne, Switzerland                 | Trestan Pilonel, Damien Jacot, Sébastien Aeby, Gilbert Greub, Claire Bertelli                                                                                                                                                                                                                                                                                                                                                                                            |
| EPI_ISL_1120947                                                                                      | Hospital Universitario 12 de Octubre                                                                                                     | SeqCOVID-SPAIN consortium/IBV(CSIC)                                                                                                                    | Esther Viedma, Raúl Recio, Irene Muñoz-Gallego, Jennifer Villa, Rafael Delgado, M <sup>o</sup> Dolores Folgueira and SeqCOVID-SPAIN consortium                                                                                                                                                                                                                                                                                                                           |
| EPI_ISL_1121034                                                                                      | LAB ANALISI PO CARDARELLI CAMPOBASSO                                                                                                     | Istituto Zooprofilattico Sperimentale dell'Abruzzo e Molise "G. Caporale"                                                                              | Scutellà M, Niro G, Felice V. Lorusso A, Maracci M, Di Domenico M, Ancora M, Curini V, Mangone I, Rinaldi A, Scialabba S, Di Pasquale A, Cammà C, Puglia I, Calistri P, Savini G                                                                                                                                                                                                                                                                                         |
| EPI_ISL_1121604                                                                                      | Vault Health                                                                                                                             | Minnesota Department of Health, Public Health Laboratory                                                                                               | Alexandra Lorentz, Jacob Garfin, Matt Plumb, and Xiong Wang                                                                                                                                                                                                                                                                                                                                                                                                              |
| EPI_ISL_1121937                                                                                      | Department of Health & Mental Hygiene Fort Greene                                                                                        | New York City Public Health Laboratory                                                                                                                 | Jade Wang, et al.                                                                                                                                                                                                                                                                                                                                                                                                                                                        |
| EPI_ISL_1121955                                                                                      | Department of Health & Mental Hygiene Jamaica                                                                                            | New York City Public Health Laboratory                                                                                                                 | Jade Wang, et al.                                                                                                                                                                                                                                                                                                                                                                                                                                                        |
| EPI_ISL_1121990, EPI_ISL_1121991                                                                     | Department of Respiratory and other Viral Infections of L.V.Gromashevsky Institute of Epidemiology & Infectious Diseases NAMS of Ukraine | Department of Respiratory and other Viral Infections of L.V.Gromashevsky Institute of Epidemiology & Infectious Diseases NAMS of Ukraine, JSC "Farmak" | Alla Mironenko, Andriy Goy, Ihor Kravchuk, Ludmyla Bolotova, Larysa Radchenko, Nataliia Teteriuk                                                                                                                                                                                                                                                                                                                                                                         |
| EPI_ISL_1121993, EPI_ISL_1122015                                                                     | Emergency department of COVID-19, Beijing Ditan Hospital                                                                                 | National Institute for Viral Disease Control and Prevention                                                                                            | Yang Song2*, Ziruo Ge1*, Shuping Cui1, 3*, Di Tian1, Gang Wan1, Shuangli Zhu2, Xianbo Wang1, Yu Wang1, Xiang Zhao2, Pan Xiang1, Yanli Xu1, Tingyu Zhang1, Long Liu1, Gang Liu1, Yanhai Wang2, Jianbo Tan1, Wei Zhang1#, Wenbo Xu2# and Zhihai Chen1#                                                                                                                                                                                                                     |
| EPI_ISL_1124674, EPI_ISL_1124691                                                                     | Department of Virus and Microbiological Special Diagnostics, Statens Serum Institut, Copenhagen, Denmark                                 | Aalborg University                                                                                                                                     | Danish Covid-19 Genome Consortium                                                                                                                                                                                                                                                                                                                                                                                                                                        |
| EPI_ISL_1125302                                                                                      | Hospital Universitari Vall d'Hebron - Vall d'Hebron Institut de Recerca                                                                  | Hospital Universitari Vall d'Hebron Institut de Recerca                                                                                                | Cristina Andrés, Maria Piñana, Josep F Abril, Damir Garcia-Cehic, Ariadna Rando, Juliana Esperalba, Maria Gema Codina, Carla Castillo, Maria Carmen Martin, Tomás Pumarola, Josep Quer, Andrés Antón                                                                                                                                                                                                                                                                     |
| EPI_ISL_1128140, EPI_ISL_1128141                                                                     | SARS-CoV-2 testing team, National Institute of Infectious Diseases                                                                       | Pathogen Genomics Center, National Institute of Infectious Diseases                                                                                    | Tsuyoshi Sekizuka, Kentaro Itokawa, Rina Tanaka, Masanori Hashino, Chang-Kweng Lim, Takahiro Maeki, Motohiko Ogawa , Eri Nakayama , Shigeru Tanjima, Makoto Kuroda                                                                                                                                                                                                                                                                                                       |
| EPI_ISL_1129449, EPI_ISL_1129621                                                                     | Viollier AG                                                                                                                              | Department of Biosystems Science and Engineering, ETH Zürich                                                                                           | Chaoran Chen, Sarah Nadeau, Catharine Aquino, Ivan Topolsky, Philipp Jablonski, Lara Fuhrmann, David Dreifuss, Katharina Jahn, Andreia Cabral de Gouvea, Maria Domenica Moccia, Simon Grüter, Timothy Sykes, Lennart Opitz, Griffin White, Laura Neff, Doris Popovic, Andrea Patrignani, Jay Tracy, Ralph Schlapbach, Christiane Beckmann, Maurice Redondo, Olivier Kobel, Christoph Noppen, Sophie Seidel, Noemie Santamaria de Souza, Niko Beerenwinkel, Tanja Stadler |
| EPI_ISL_1129628, EPI_ISL_1129713                                                                     | Viollier AG                                                                                                                              | Department of Biosystems Science and Engineering, ETH Zürich                                                                                           | Chaoran Chen, Sarah Nadeau, Ivan Topolsky, Emmanouil Dermitzakis, Keith Harshman, Ioannis Xenarios, Henri Pegeot, Lorenzo Cerutti, Deborah Penet, Philipp Jablonski, Lara Fuhrmann, David Dreifuss, Katharina Jahn, Christiane Beckmann, Maurice Redondo, Olivier Kobel, Christoph Noppen, Sophie Seidel, Noemie Santamaria de Souza, Niko Beerenwinkel, Tanja Stadler                                                                                                   |
| EPI_ISL_1130048, EPI_ISL_1130095                                                                     | Viollier AG                                                                                                                              | Department of Biosystems Science and Engineering, ETH Zürich                                                                                           | Chaoran Chen, Sarah Nadeau, Catharine Aquino, Ivan Topolsky, Philipp Jablonski, Lara Fuhrmann, David Dreifuss, Katharina Jahn, Andreia Cabral de Gouvea, Maria Domenica Moccia, Simon Grüter, Timothy Sykes, Lennart Opitz, Griffin White, Laura Neff, Doris Popovic, Andrea Patrignani, Jay Tracy, Ralph Schlapbach, Christiane Beckmann, Maurice Redondo, Olivier Kobel, Christoph Noppen, Sophie Seidel, Noemie Santamaria de Souza, Niko Beerenwinkel, Tanja Stadler |
| EPI_ISL_1130145                                                                                      | Viollier AG                                                                                                                              | Department of Biosystems Science and Engineering, ETH Zürich                                                                                           | Christian Beisel, Sarah Nadeau, Chaoran Chen, Ivan Topolsky, Philipp Jablonski, Lara Fuhrmann, David Dreifuss, Katharina Jahn, Rebecca Denes, Mirjam Feldkamp, Ina Nissen, Natascha Santacroce, Elodie Burcklen, Christiane Beckmann, Maurice Redondo, Olivier Kobel, Christoph Noppen, Sophie Seidel, Noemie Santamaria de Souza, Niko Beerenwinkel, Tanja Stadler                                                                                                      |
| EPI_ISL_1130280, EPI_ISL_1130314, EPI_ISL_1130630                                                    | Viollier AG                                                                                                                              | Department of Biosystems Science and Engineering, ETH Zürich                                                                                           | Chaoran Chen, Sarah Nadeau, Ivan Topolsky, Emmanouil Dermitzakis, Keith Harshman, Ioannis Xenarios, Henri Pegeot, Lorenzo Cerutti, Deborah Penet, Philipp Jablonski, Lara Fuhrmann, David Dreifuss, Katharina Jahn, Christiane Beckmann, Maurice Redondo, Olivier Kobel, Christoph Noppen, Sophie Seidel, Noemie Santamaria de Souza, Niko Beerenwinkel, Tanja Stadler                                                                                                   |
| EPI_ISL_1130968                                                                                      | Viollier AG                                                                                                                              | Department of Biosystems Science and Engineering, ETH Zürich                                                                                           | Christian Beisel, Sarah Nadeau, Chaoran Chen, Ivan Topolsky, Philipp Jablonski, Lara Fuhrmann, David Dreifuss, Katharina Jahn, Rebecca Denes, Mirjam Feldkamp, Ina Nissen, Natascha Santacroce, Elodie Burcklen, Christiane Beckmann, Maurice Redondo, Olivier Kobel, Christoph Noppen, Sophie Seidel, Noemie Santamaria de Souza, Niko Beerenwinkel, Tanja Stadler                                                                                                      |
| EPI_ISL_1131116                                                                                      | Viollier AG                                                                                                                              | Department of Biosystems Science and Engineering, ETH Zürich                                                                                           | Chaoran Chen, Sarah Nadeau, Catharine Aquino, Ivan Topolsky, Philipp Jablonski, Lara Fuhrmann, David Dreifuss, Katharina Jahn, Andreia Cabral de Gouvea, Maria Domenica Moccia, Simon Grüter, Timothy Sykes, Lennart Opitz, Griffin White, Laura Neff, Doris Popovic, Andrea Patrignani, Jay Tracy, Ralph Schlapbach, Christiane Beckmann, Maurice Redondo, Olivier Kobel, Christoph Noppen, Sophie Seidel, Noemie Santamaria de Souza, Niko Beerenwinkel, Tanja Stadler |
| EPI_ISL_1132203, EPI_ISL_1132236, EPI_ISL_1132250                                                    | Florida Bureau of Public Health Laboratories                                                                                             | Florida Bureau of Public Health Laboratories                                                                                                           | Sarah Schmedes, Jason Blanton                                                                                                                                                                                                                                                                                                                                                                                                                                            |
| EPI_ISL_1132795                                                                                      | Vault Health                                                                                                                             | Minnesota Department of Health, Public Health Laboratory                                                                                               | Alexandra Lorentz, Jacob Garfin, Matt Plumb, and Xiong Wang                                                                                                                                                                                                                                                                                                                                                                                                              |
| EPI_ISL_1133259, EPI_ISL_1133265, EPI_ISL_1133273, EPI_ISL_1133275, EPI_ISL_1133276, EPI_ISL_1133277 | Laboratório Hermes Pardini                                                                                                               | Laboratório de Biologia Integrativa, Instituto de Ciências Biológicas, Universidade Federal de Minas Gerais                                            | Filipe Romero Rebelo Moreira, Diego Menezes Bonfimi, Danielle Alves Gomes Zauli, Joice do Prado Silva, Aline Brito de Lima, Frederico Scott Varella Malta, Alessandro Clayton de Souza Ferreira, Victor Cavalcanti Pardini, Daniel Costa Queiroz, Rafael Marques de Souza, Victor Emmanuel Viana Geddes, Walyson Coelho Costa, Wagner Carlos Santos Magalhaes, Rennan Garcia's Moreira, Carolina Moreira Voloch, Renan Pedra de Souza, Renato Santana Aguiar.            |
| EPI_ISL_1134942, EPI_ISL_1134984, EPI_ISL_1135003, EPI_ISL_1135031                                   | BIOMNIS LYON                                                                                                                             | CNR Virus des Infections Respiratoires - France SUD                                                                                                    | Antonin Bal, Gregory Destras, Gwendolynne Burfin, Hadrien Regue, Quentin Semanas, Martine Valette, Bruno Lina, Laurence Josset                                                                                                                                                                                                                                                                                                                                           |
| EPI_ISL_1135040                                                                                      | 24530 AU SERVICE ACCUEIL MEDICAL UPATOU                                                                                                  | CNR Virus des Infections Respiratoires - France SUD                                                                                                    | Antonin Bal, Gregory Destras, Gwendolynne Burfin, Hadrien Regue, Quentin Semanas, Martine Valette, Bruno Lina, Laurence Josset                                                                                                                                                                                                                                                                                                                                           |
| EPI_ISL_1135056                                                                                      | C.H. PRINCESSE GRACE                                                                                                                     | CNR Virus des Infections Respiratoires - France SUD                                                                                                    | Antonin Bal, Gregory Destras, Gwendolynne Burfin, Hadrien Regue, Quentin Semanas, Martine Valette, Bruno Lina, Laurence Josset                                                                                                                                                                                                                                                                                                                                           |
| EPI_ISL_1137621                                                                                      | Laboratoire central de Virologie                                                                                                         | Laboratoire de Biotechnologie                                                                                                                          | Myriam Sefar, Hakima Kabbaj, Ghizlane EL Amin, Amal Zouaki, Abdelmunim Essabbar, Tarik Aanniz, Mouna Ouadghiri, Saaid Amzazi, Lahcen Belyamani and Azeddine Ibrahim                                                                                                                                                                                                                                                                                                      |
| EPI_ISL_1138419                                                                                      | Laboratorio de Referencia Nacional de Virus Respiratorio. Instituto Nacional de Salud Perú                                               | Laboratorio de Referencia Nacional de Biotecnología y Biología Molecular. Instituto Nacional de Salud Perú                                             | Carlos Padilla Rojas, Karolyn Vega Chozo, Luis Barcoena, Priscila Lope Pari, Omar Caceres Rey, Marco Galarza Perez, Maribel Huaranga Nuñez, Johanna Balbuena Torrez, Henri Bailon Calderon, Nancy Rojas Serrano                                                                                                                                                                                                                                                          |
| EPI_ISL_1140115                                                                                      | Università di Parma, Laboratorio di Igiene e Sanità Pubblica                                                                             | Istituto Zooprofilattico Sperimentale della Lombardia e                                                                                                | Maria Eugenia Colucci, Licia Veronesi, Paola Affanni, Marina Morganti, Ilaria Mennozzi, Erika Scaltriti, Stefano Pongolini                                                                                                                                                                                                                                                                                                                                               |

|                                                                                                                                                                                                                                                                                |                                                                                                                                        |                                                                                                                                                                                                      |                                                                                                                                                                                                                                                           |
|--------------------------------------------------------------------------------------------------------------------------------------------------------------------------------------------------------------------------------------------------------------------------------|----------------------------------------------------------------------------------------------------------------------------------------|------------------------------------------------------------------------------------------------------------------------------------------------------------------------------------------------------|-----------------------------------------------------------------------------------------------------------------------------------------------------------------------------------------------------------------------------------------------------------|
| EPI_ISL_1141754                                                                                                                                                                                                                                                                | General Hospital - Veles                                                                                                               | dell'Emilia Romagna (IZSLER), Risk Analysis and Genomic Epidemiology Unit<br>Research Center for Genetic Engineering and Biotechnology "Georgi D. Efremov" , Macedonian Academy of Sciences and Arts | Aleksandar J. Dimovski, Dijana Plasheska-Karanfilska, Predrag Noveski, Gjorgji Bozinovski, Milena Jakimovska                                                                                                                                              |
| EPI_ISL_1143347                                                                                                                                                                                                                                                                | General Hospital - Tetovo                                                                                                              | Research Center for Genetic Engineering and Biotechnology "Georgi D. Efremov" , Macedonian Academy of Sciences and Arts                                                                              | Aleksandar J. Dimovski, Dijana Plasheska-Karanfilska, Predrag Noveski, Gjorgji Bozinovski, Milena Jakimovska                                                                                                                                              |
| EPI_ISL_1154890                                                                                                                                                                                                                                                                | Area Biologia Molecolare - Istituto Zooprofilattico Sperimentale della Sicilia                                                         | Area Biologia Molecolare - Istituto Zooprofilattico Sperimentale della Sicilia                                                                                                                       | REALE Stefano, SCIBETTA Silvia, PIAZZA Angela, BRUNO Gabriella, CASTELLI Germano, BRUNO Federica, VITALE Francesco, TRAMUTO Fabio, MAIDA Carmelo Massimo, MAZZUCCO Walter, DI NARO Daniela, RANDAZZO Giulia, VITALE Fabrizio                              |
| EPI_ISL_1157404                                                                                                                                                                                                                                                                | Northwestern Memorial Hospital                                                                                                         | Northwestern University - Ozer Lab                                                                                                                                                                   | Ramon Lorenzo-Redondo, Lacy M. Simons, Taylor J. Dean, Chad J. Achenbach, Lawrence J. Jennings, Chao Qi, Michael G. Ison, Judd F. Hultquist, Egon A. Ozer                                                                                                 |
| EPI_ISL_1158081, EPI_ISL_1158112, EPI_ISL_1158141, EPI_ISL_1158185, EPI_ISL_1158255, EPI_ISL_1158375, EPI_ISL_1158404, EPI_ISL_1158491, EPI_ISL_1158498                                                                                                                        | Michigan Department of Health and Human Services, Bureau of Laboratories                                                               | Michigan Department of Health and Human Services, Bureau of Laboratories                                                                                                                             | Blankenship HM, Riner D, Soehnlén MK                                                                                                                                                                                                                      |
| EPI_ISL_1159113, EPI_ISL_1159114                                                                                                                                                                                                                                               | DC Public Health Lab/ Dept. of Forensic Sciences                                                                                       | DC Public Health Lab/ Dept. of Forensic Sciences                                                                                                                                                     | Scott Nguyen, Janis Doss, Elizabeth Zelaya, Sarah Scott, Connie Maza, Monica Mann, Brittany Hamilton, David Payne, Jocelyn Hauser                                                                                                                         |
| EPI_ISL_1159147                                                                                                                                                                                                                                                                | HOSPITAL COMARCAL DE MELILLA                                                                                                           | Instituto de Salud Carlos III                                                                                                                                                                        | Vázquez-Morón,S. Iglesias-Caballero, M. Sandonís,V. Camarero, S. Pozo, F. Casas, I. Jiménez, P. Zaballos, A. Monzón, S. Varona, S. Cuesta, I.ROMAN SOTO, SERGIO                                                                                           |
| EPI_ISL_1159168                                                                                                                                                                                                                                                                | HOSPITAL SAN PEDRO DE ALCANTARA - C.D. 05                                                                                              | Instituto de Salud Carlos III                                                                                                                                                                        | Sandonís,V. Vázquez-Morón, S. Iglesias-Caballero, M. Camarero, S. Pozo, F. Casas, I. Jiménez, P. Zaballos, A. Monzón, S. Varona, S. Cuesta, I. RODRIGUEZ RODRIGUEZ, GUADALUPE                                                                             |
| EPI_ISL_1159186, EPI_ISL_1159189                                                                                                                                                                                                                                               | HOSPITAL LOS ARCOS                                                                                                                     | Instituto de Salud Carlos III                                                                                                                                                                        | Sandonís,V. Vázquez-Morón, S. Iglesias-Caballero, M. Camarero, S. Pozo, F. Casas, I. Jiménez, P. Zaballos, A. Monzón, S. Varona, S. Cuesta, I. CAMARA SIMON, MARGARITA                                                                                    |
| EPI_ISL_1159216                                                                                                                                                                                                                                                                | HOSPITAL UNIVERS MARQUES DE VALDECILLA                                                                                                 | Instituto de Salud Carlos III                                                                                                                                                                        | Iglesias-Caballero, M. Sandonís,V. Vázquez-Morón, S. Camarero, S. Pozo, F. Casas, I. Jiménez, P. Zaballos, A. Monzón, S. Varona, S. Cuesta, I.SALAS VENERO, CARLOS ANTONIO                                                                                |
| EPI_ISL_1159375                                                                                                                                                                                                                                                                | Bahman Hospital                                                                                                                        | Laboratory of Molecular Biology and Cancer Immunology,Lebanese University Public Health England                                                                                                      | Fadi Abdel Sater, Steven Pullan                                                                                                                                                                                                                           |
| EPI_ISL_1163669, EPI_ISL_1163670, EPI_ISL_1163671, EPI_ISL_1163672, EPI_ISL_1163673, EPI_ISL_1163674, EPI_ISL_1163675, EPI_ISL_1163676, EPI_ISL_1163677, EPI_ISL_1163678, EPI_ISL_1163679, EPI_ISL_1163680, EPI_ISL_1163681, EPI_ISL_1163682, EPI_ISL_1163683, EPI_ISL_1163687 | see above                                                                                                                              | Yale Clinical Virology Lab                                                                                                                                                                           | Grubaugh Lab - Yale School of Public Health                                                                                                                                                                                                               |
| EPI_ISL_1163848                                                                                                                                                                                                                                                                | Clinical Molecular Microbiology Laboratory, UNC Hospitals                                                                              | Jeremy Wang                                                                                                                                                                                          | Jeremy Wang, Alexander Rubinsteyn, Colleen Rice, Jason Smedberg, Shawn Hawken, Melissa Miller, Corbin Jones, Robert Hagan                                                                                                                                 |
| EPI_ISL_1164109                                                                                                                                                                                                                                                                | National Virus Reference Laboratory                                                                                                    | National Virus Reference Laboratory                                                                                                                                                                  | Zoe Yandle, Charlene Bennet, Gabriel Gonzalez, Michael Carr, Jonathan Dean, Cillian F De Gascun                                                                                                                                                           |
| EPI_ISL_1164700, EPI_ISL_1164733, EPI_ISL_1164739, EPI_ISL_1164741                                                                                                                                                                                                             | Department of Molecular Virology, Cyprus Institute of Neurology and Genetics                                                           | Department of Molecular Virology, Cyprus Institute of Neurology and Genetics                                                                                                                         | Jan Richter, Pavlos Fanis, Christina Tryfonos, Dana Koptides, George Kraschias, Stavros Bashiardes, Andreas Hadjisavvas, Maria Loizidou, Anastasis Oulas, Denise Alexandrou, Olga Kalakouta, Mihalis Panayiotidis, George Spyrou, Christina Christodoulou |
| EPI_ISL_1164781                                                                                                                                                                                                                                                                | School of Pharmacy, Shenandoah University                                                                                              | School of Pharmacy, Shenandoah University                                                                                                                                                            | Adams,S.M., Harralson,A.F., Kidd,R.S., Sawyer,G.W.                                                                                                                                                                                                        |
| EPI_ISL_1165030, EPI_ISL_1165034, EPI_ISL_1165063                                                                                                                                                                                                                              | Division of Emerging Infectious Diseases, Bureau of Infectious Diseases Diagnosis Control, Korea Disease Control and Prevention Agency | Division of Emerging Infectious Diseases, Bureau of Infectious Diseases Diagnosis Control, Korea Disease Control and Prevention Agency                                                               | Ae Kyung Park, Il-Hwan Kim, Heui Man Kim, Jeong-Min Kim, Namjoo Lee, Chae Young Lee, Sang Hee Woo, Eun-Jin Kim                                                                                                                                            |
| EPI_ISL_1165066                                                                                                                                                                                                                                                                | Struttura Semplice Dipartimentale di Virologia e Microbiologia molecolare, Azienda Ospedaliero-Universitaria, Policlinico di Modena    | U.O. Microbiologia, Laboratorio Unico Centro Servizi - AUSL della Romagna                                                                                                                            | Pecorari Monica, Gennari William, Fregni Serpini Giulia, Giorgio Dirani, Silvia Zannoli, Vittorio Sambri                                                                                                                                                  |
| EPI_ISL_1165922, EPI_ISL_1165936, EPI_ISL_1165940                                                                                                                                                                                                                              | BIOMNIS LYON                                                                                                                           | CNR Virus des Infections Respiratoires - France SUD                                                                                                                                                  | Antonin Bal, Gregory Destras, Gwendolyné Burfin, Hadrien Regue, Quentin Semanas, Martine Valette, Bruno Lina, Laurence Josset                                                                                                                             |
| EPI_ISL_1166109                                                                                                                                                                                                                                                                | University of Wisconsin-Madison AIDS Vaccine Research Laboratories                                                                     | University of Wisconsin-Madison AIDS Vaccine Research Laboratories                                                                                                                                   | Gage Moreno, Katarina Braun, et al. AIDS Vaccine Research Laboratories                                                                                                                                                                                    |
| EPI_ISL_1166148                                                                                                                                                                                                                                                                | Laboratorio Analisi Osp. Città di Castello - Azienda USL Umbria1                                                                       | Istituto Zooprofilattico Sperimentale dell'Abruzzo e Molise "G. Caporale"                                                                                                                            | Malagigi V, Tacconi P, Lorusso A, Marcacci M, Di Domenico M, Ancora M, Curini V, Mangone I, Rinaldi A, Scialabba S, Di Pasquale A, Cammà C, Puglia I, Calistri P, Savini G                                                                                |
| EPI_ISL_1166154                                                                                                                                                                                                                                                                | Università degli Studi di Perugia                                                                                                      | Istituto Zooprofilattico Sperimentale dell'Abruzzo e Molise "G. Caporale"                                                                                                                            | Mencacci A, Camilloni B, Lorusso A, Marcacci M, Di Domenico M, Ancora M, Curini V, Mangone I, Rinaldi A, Scialabba S, Di Pasquale A, Cammà C, Puglia I, Calistri P, Savini G                                                                              |
| EPI_ISL_1166176                                                                                                                                                                                                                                                                | Istituto Zooprofilattico Sperimentale Umbria e Marche "Togo Rosati"                                                                    | Istituto Zooprofilattico Sperimentale dell'Abruzzo e Molise "G. Caporale"                                                                                                                            | Biagetti M, Giammarioli M, Lorusso A, Marcacci M, Di Domenico M, Ancora M, Curini V, Mangone I, Rinaldi A, Scialabba S, Di Pasquale A, Cammà C, Puglia I, Calistri P, Savini G                                                                            |
| EPI_ISL_1166484, EPI_ISL_1166485, EPI_ISL_1166488, EPI_ISL_1166493, EPI_ISL_1166501, EPI_ISL_1166526                                                                                                                                                                           | ASL Napoli 1 Centro                                                                                                                    | AMES Centro Poldiagnostico Strumentale S.r.l.                                                                                                                                                        | "Giovanni Savarese, Raffaella Ruggiero, Eloisa Evangelista, Antonella Di Carlo, Luisa Circelli, Luigi D'Amore, Nadia Petrillo, Monica Ianniello, Roberto Sirica,Maurizio D'Amora, Antonio Fico"                                                           |
| EPI_ISL_1166693, EPI_ISL_1166808                                                                                                                                                                                                                                               | University Hospitals of Geneva, Laboratory of Virology                                                                                 | HUG, Laboratory of Virology and the Health2030 Genome Center                                                                                                                                         | Samuel Cordey, Ana Rita Goncalves, Laurent Kaiser, Lorenzo Cerutti, Henri Pegeot, Melyssa Elies, Deborah Penet, Keith Harshman, Ioannis Xenarios, Emmanouil Dermitzakis                                                                                   |
| EPI_ISL_1167403                                                                                                                                                                                                                                                                | ASL Napoli 1 Centro                                                                                                                    | AMES Centro Poldiagnostico Strumentale S.r.l.                                                                                                                                                        | "Giovanni Savarese, Raffaella Ruggiero, Eloisa Evangelista, Antonella Di Carlo, Luisa Circelli, Luigi D'Amore, Nadia Petrillo, Monica Ianniello, Roberto Sirica,Maurizio D'Amora, Antonio Fico"                                                           |
| EPI_ISL_1167568                                                                                                                                                                                                                                                                | Ministry of Health Turkey                                                                                                              | Ministry of Health Turkey                                                                                                                                                                            | Fatma Bayraktar, Yasemin Cosgun, Suleyman Yalcin, Gulay Korukluoglu                                                                                                                                                                                       |
| EPI_ISL_1167921, EPI_ISL_1167924, EPI_ISL_1167927, EPI_ISL_1167931                                                                                                                                                                                                             | Genetica Molecular and Subdepartamento de Virologia ISP Chile                                                                          | Instituto de Salud Publica de Chile                                                                                                                                                                  | Javier Tognarelli, Karen Orostica, Barbara Parra, Loredana Arata, Jaime Lagos, Gisselle Barra, Patricia Bustos, Rodrigo Fasce, Andres Castillo, Jorge Fernandez                                                                                           |
| EPI_ISL_1168289, EPI_ISL_1168340                                                                                                                                                                                                                                               | Academic Center for Pathomorphological and Genetic-Molecular Diagnostics Ltd, Bialystok, Poland                                        | Academic Center for Pathomorphological and Genetic-Molecular Diagnostics Ltd, Bialystok, Poland                                                                                                      | Radoslaw Charkiewicz, Przemyslaw Biecek, Jacek Nikliski, Joanna Resze                                                                                                                                                                                     |
| EPI_ISL_1168737                                                                                                                                                                                                                                                                | Connecticut Department of Health                                                                                                       | Grubaugh Lab - Yale School of Public Health                                                                                                                                                          | Tara Alpert, Joseph Fauver, Anderson Brito, Mallery Breban, Anne Wylie, Chantal Vogels, Mary Petrone, Annie Watkins, Chaney Kalinich, Isabel Ott, Nathan Grubaugh                                                                                         |
| EPI_ISL_1168740, EPI_ISL_1168742, EPI_ISL_1168744, EPI_ISL_1168749, EPI_ISL_1168750, EPI_ISL_1168751, EPI_ISL_1168755, EPI_ISL_1168760                                                                                                                                         | Tempus                                                                                                                                 | Grubaugh Lab - Yale School of Public Health                                                                                                                                                          | Tara Alpert, Joseph Fauver, Anderson Brito, Mallery Breban, Anne Wylie, Chantal Vogels, Mary Petrone, Annie Watkins, Chaney Kalinich, Isabel Ott, Nathan Grubaugh                                                                                         |
| EPI_ISL_1168765                                                                                                                                                                                                                                                                | Yale Pathology Lab                                                                                                                     | Grubaugh Lab - Yale School of Public Health                                                                                                                                                          | Tara Alpert, Joseph Fauver, Chen Liu, Pei Hui, Jianhui Wang, Susan Bell and Han Zhou, Anderson Brito, Mallery Breban, Anne Wylie, Chantal Vogels,                                                                                                         |

|                                                                                                                                                                                                                                                                                                                                                                                                                                                                                                                                                                                                                                                                                                                                                                                                                                                |                                                                                                                                                                                                                     |                                                                                                                            |                                                                                                                                                                                                                                                                                                                                                                                                                                                                                                                                                                                                                                                         |
|------------------------------------------------------------------------------------------------------------------------------------------------------------------------------------------------------------------------------------------------------------------------------------------------------------------------------------------------------------------------------------------------------------------------------------------------------------------------------------------------------------------------------------------------------------------------------------------------------------------------------------------------------------------------------------------------------------------------------------------------------------------------------------------------------------------------------------------------|---------------------------------------------------------------------------------------------------------------------------------------------------------------------------------------------------------------------|----------------------------------------------------------------------------------------------------------------------------|---------------------------------------------------------------------------------------------------------------------------------------------------------------------------------------------------------------------------------------------------------------------------------------------------------------------------------------------------------------------------------------------------------------------------------------------------------------------------------------------------------------------------------------------------------------------------------------------------------------------------------------------------------|
| EPI_ISL_1169047                                                                                                                                                                                                                                                                                                                                                                                                                                                                                                                                                                                                                                                                                                                                                                                                                                | RSUP Dr. Mohammad Hoesin Palembang Sumatera Selatan                                                                                                                                                                 | National Institute of Health Research and Development                                                                      | Mary Petrone, Chaney Kalinich, Isabel Ott, Arnau Casanovas, Catherine Muenker, Adam Moore, Alice Lu, Maria Tokuyama, Patrick Wong, Peiwen Lu, Saad Omer, Richard Martinello, Allison Nelson, Shelli Farhadian, Akiko Iwasaki, Charlese Dela Cruz, Albert Ko, Nathan Grubaugh                                                                                                                                                                                                                                                                                                                                                                            |
| EPI_ISL_1169048                                                                                                                                                                                                                                                                                                                                                                                                                                                                                                                                                                                                                                                                                                                                                                                                                                | BBTKLPP Banjarbaru, Kalimantan Selatan                                                                                                                                                                              | National Institute of Health Research and Development                                                                      | Vivi Setiawaty, Hana Apsari Pawestri, Subangkit, Kartika Dewi Puspa, Arie Ardiansyah Nugraha, Hartanti Dian Ikawati, Nelly Puspandari                                                                                                                                                                                                                                                                                                                                                                                                                                                                                                                   |
| EPI_ISL_1169236, EPI_ISL_1169262, EPI_ISL_1169263                                                                                                                                                                                                                                                                                                                                                                                                                                                                                                                                                                                                                                                                                                                                                                                              | ASL Napoli 1 Centro                                                                                                                                                                                                 | AMES Centro Poldiagnostico Strumentale S.r.l.                                                                              | Vivi Setiawaty, Hana Apsari Pawestri, Subangkit, Kartika Dewi Puspa, Arie Ardiansyah Nugraha, Hartanti Dian Ikawati, Nelly Puspandari                                                                                                                                                                                                                                                                                                                                                                                                                                                                                                                   |
| EPI_ISL_1169488                                                                                                                                                                                                                                                                                                                                                                                                                                                                                                                                                                                                                                                                                                                                                                                                                                | MI - Michigan Department of Health and Human Services - Bureau of Laboratories                                                                                                                                      | Genomics and Discovery, Respiratory Viruses Branch, Division of Viral Diseases, Centers for Disease Control and Prevention | *Giovanni Savarese, Raffaella Ruggiero, Eloisa Evangelista, Antonella Di Carlo, Luisa Ciricelli, Luigi D'Amore, Nadia Petrillo, Monica Ianniello, Roberto S'rica, Maurizio D'Amora, Antonio Fico                                                                                                                                                                                                                                                                                                                                                                                                                                                        |
| EPI_ISL_1169660                                                                                                                                                                                                                                                                                                                                                                                                                                                                                                                                                                                                                                                                                                                                                                                                                                | Colorado Department of Public Health and Environment                                                                                                                                                                | Colorado Department of Public Health and Environment                                                                       | Krista Queen, Yan Li, Ying Tao, Jing Zhang, Anna Uehara, Anna Montmayeur, Clinton R. Paden, Peter W. Cook, Rachel Marine, Mili Sheth, Jasmine Padilla, Sarah Nobles, Mark Burroughs, Lori Rowe, Haibin Wang, Ben L. Rambo-Martin, Dhvani Batra, Justin Lee, Suxiang Tong                                                                                                                                                                                                                                                                                                                                                                                |
| EPI_ISL_1170129, EPI_ISL_1170130                                                                                                                                                                                                                                                                                                                                                                                                                                                                                                                                                                                                                                                                                                                                                                                                               | Instituto Nacional de Saude (INSA)                                                                                                                                                                                  | Instituto Nacional de Saude (INSA) and Institute of Biomedicine (iBiMed), Universidade de Aveiro                           | Laura Bankers, Molly C. Hetherington-Rauth, Diana Ir, Shannon Ely, Shannon R. Matzinger, Sarah Elizabeth Totten, Emily A. Travanty                                                                                                                                                                                                                                                                                                                                                                                                                                                                                                                      |
| EPI_ISL_1170156, EPI_ISL_1170188                                                                                                                                                                                                                                                                                                                                                                                                                                                                                                                                                                                                                                                                                                                                                                                                               | Instituto Nacional de Saude (INSA)                                                                                                                                                                                  | Instituto Nacional de Saude (INSA)                                                                                         | Borges et al                                                                                                                                                                                                                                                                                                                                                                                                                                                                                                                                                                                                                                            |
| EPI_ISL_1170725, EPI_ISL_1170774                                                                                                                                                                                                                                                                                                                                                                                                                                                                                                                                                                                                                                                                                                                                                                                                               | Public Health Ontario Laboratory                                                                                                                                                                                    | Public Health Ontario Laboratory                                                                                           | Borges et al                                                                                                                                                                                                                                                                                                                                                                                                                                                                                                                                                                                                                                            |
| EPI_ISL_1170949                                                                                                                                                                                                                                                                                                                                                                                                                                                                                                                                                                                                                                                                                                                                                                                                                                | PHV-FSS                                                                                                                                                                                                             | PHV-FSS                                                                                                                    | Vanessa G Allen, Philip Banh, Yao Chen, Richard de Borja, Alireza Eshaghi, Nahuel Fittipaldi, Christine Frantz, Jonathan B Gubbay, Jennifer L Guthrie, Lawrence Heisler, Esha Joshi, Michael Laszloffy, Aimin Li, Michael CY Li, Dean Maxwell, Sandeep Nagra, Samir N Patel, Jared Simpson, Karthikeyan Sivaraman, Ashleigh Sullivan, Yogi Sundaravadanam, Sarah Teatero, Andre Villegas, Matthew Watson, Sandra Zittermann                                                                                                                                                                                                                             |
| EPI_ISL_1171561                                                                                                                                                                                                                                                                                                                                                                                                                                                                                                                                                                                                                                                                                                                                                                                                                                | Clinique N.D de Grâce Gosselies                                                                                                                                                                                     | GIGA Medical Genomics                                                                                                      | Son Nguyen                                                                                                                                                                                                                                                                                                                                                                                                                                                                                                                                                                                                                                              |
| EPI_ISL_1171678                                                                                                                                                                                                                                                                                                                                                                                                                                                                                                                                                                                                                                                                                                                                                                                                                                | UOC LAB ANALISI PO CARDARELLI CAMPOBASSO                                                                                                                                                                            | Istituto Zooprofilattico Sperimentale dell'Abruzzo e Molise "G. Caporale"                                                  | Keith Durkin, Maria Artesi, Sébastien Bontems, Raphaël Boreux, Bouchra Boujemla, Nathalie Renotte, Cécile Meex, Pierrette Melin, Marie-Pierre Hayette, Vincent Bours                                                                                                                                                                                                                                                                                                                                                                                                                                                                                    |
| EPI_ISL_1171977, EPI_ISL_1172008                                                                                                                                                                                                                                                                                                                                                                                                                                                                                                                                                                                                                                                                                                                                                                                                               | Instituto Nacional de Saude (INSA)                                                                                                                                                                                  | Instituto Nacional de Saude (INSA)                                                                                         | Scutellà M, Niro G, Felice V. Lorusso A, Marcacci M, Di Domenico M, Ancora M, Curini V, Mangone I, Rinaldi A, Scialabba S, Di Pasquale A, Cammà C, Puglia I, Calistri P, Savini G                                                                                                                                                                                                                                                                                                                                                                                                                                                                       |
| EPI_ISL_1172032                                                                                                                                                                                                                                                                                                                                                                                                                                                                                                                                                                                                                                                                                                                                                                                                                                | LabPLUS                                                                                                                                                                                                             | Institute of Environmental Science and Research (ESR)                                                                      | Borges et al                                                                                                                                                                                                                                                                                                                                                                                                                                                                                                                                                                                                                                            |
| EPI_ISL_1172093                                                                                                                                                                                                                                                                                                                                                                                                                                                                                                                                                                                                                                                                                                                                                                                                                                | Fulgent Genetics                                                                                                                                                                                                    | Fulgent Genetics                                                                                                           | Rachel Boyle, SallyAnn Harbison, Olivia Stroeven, Xiaoyun Ren, Matt Storey, Nikki Freed, Muhammad Faisal, Jing Wang, Hermes Perez, Anja Werno, Antje van der Linden, Arlo Upton, Chris Mansell, David Hammer, Dragana Drinkovic, Gary McAuliffe, Hana Sofia Andersson, James Ussher, Jill Sherwood, Josh Freeman, Julia Howard, Juliet Ely, Mary DeAlmeida, Matt Blakiston, Matthew Rogers, Max Bloomfield, Michael Addidie, Michelle Balm, Sally Roberts, Sarah Jefferies, Sharmini Mutaiyah, Susan Morpeth, Susan Taylor, Timothy Blackmore, Vani Sathyendran, Veronica Playle, Virginia Hope, Erasmus Smit, Lauren Jelly, Olin Silander, Joep de Lig |
| EPI_ISL_1172199, EPI_ISL_1172232, EPI_ISL_1172248, EPI_ISL_1172346, EPI_ISL_1172349, EPI_ISL_1172355, EPI_ISL_1172357, EPI_ISL_1172369, EPI_ISL_1172374, EPI_ISL_1172387, EPI_ISL_1172398, EPI_ISL_1172479, EPI_ISL_1172492, EPI_ISL_1172532, EPI_ISL_1172539, EPI_ISL_1172551, EPI_ISL_1172574, EPI_ISL_1172584, EPI_ISL_1172619, EPI_ISL_1172637, EPI_ISL_1172641, EPI_ISL_1172685, EPI_ISL_1172691, EPI_ISL_1172751, EPI_ISL_1172758, EPI_ISL_1172760, EPI_ISL_1172764, EPI_ISL_1172822, EPI_ISL_1172827, EPI_ISL_1172832, EPI_ISL_1172872, EPI_ISL_1172927, EPI_ISL_1172930, EPI_ISL_1172939, EPI_ISL_1172971, EPI_ISL_1172998, EPI_ISL_1173011, EPI_ISL_1173018, EPI_ISL_1173019, EPI_ISL_1173033, EPI_ISL_1173035, EPI_ISL_1173039, EPI_ISL_1173047, EPI_ISL_1173059, EPI_ISL_1173087, EPI_ISL_1173113, EPI_ISL_1173118, EPI_ISL_1173137 | Harry Gao, Mickey Li, John Gao, Joseph Fierro, Benafsh Sapra, Becky Tsai, Yan Meng, Doreen Ng, James Xie                                                                                                            |                                                                                                                            |                                                                                                                                                                                                                                                                                                                                                                                                                                                                                                                                                                                                                                                         |
| see above                                                                                                                                                                                                                                                                                                                                                                                                                                                                                                                                                                                                                                                                                                                                                                                                                                      | Pandemic Response Lab - NYC                                                                                                                                                                                         | Pandemic Response Lab, R&D                                                                                                 | Henry Lee, Michael Hammerling, Melissa Hopkins, Cybill del Castillo, Shinyoung Clair Kang, William Ward, Pradeep Bugga, Haiping Hao, Jon Laurent                                                                                                                                                                                                                                                                                                                                                                                                                                                                                                        |
| EPI_ISL_1173217, EPI_ISL_1173230, EPI_ISL_1173240                                                                                                                                                                                                                                                                                                                                                                                                                                                                                                                                                                                                                                                                                                                                                                                              | Nigeria Centre for Disease Control (NCDC)                                                                                                                                                                           | African Centre for Excellence for Genomics of Infectious Diseases (ACEGID), Redeemer's University                          | Olawoye, I.B., et al                                                                                                                                                                                                                                                                                                                                                                                                                                                                                                                                                                                                                                    |
| EPI_ISL_1173817                                                                                                                                                                                                                                                                                                                                                                                                                                                                                                                                                                                                                                                                                                                                                                                                                                | Università Federico II - Dipartimento di scienze mediche traslazionali - Napoli                                                                                                                                     | TIGEM                                                                                                                      | Antonio Grimaldi Patrizia Annunziata Francesco Panariello Michele Cennamo Valentina Bouche Chiara Colantuono Lucio Di Filippo Mariano Fiorenza Anna Manfredi Marcello Salvi Giuseppe Portella Andrea Ballabio Davide Cacchiarelli                                                                                                                                                                                                                                                                                                                                                                                                                       |
| EPI_ISL_1175355                                                                                                                                                                                                                                                                                                                                                                                                                                                                                                                                                                                                                                                                                                                                                                                                                                | Lighthouse Lab in Glasgow                                                                                                                                                                                           | Wellcome Sanger Institute for the COVID-19 Genomics UK (COG-UK) Consortium                                                 | Harper VanSteenhouse, Yumi Kasai, David Gray, Carol Clugston, Anna Dominiczak and Alex Alderton, Roberto Amato, Jeffrey Barrett, Sonia Goncalves, Ewan Harrison, David K. Jackson, Ian Johnston, Dominic Kwiatkowski, Cordelia Langford, John Sillitoe on behalf of the Wellcome Sanger Institute COVID-19 Surveillance Team                                                                                                                                                                                                                                                                                                                            |
| EPI_ISL_1176328                                                                                                                                                                                                                                                                                                                                                                                                                                                                                                                                                                                                                                                                                                                                                                                                                                | AZ Klina                                                                                                                                                                                                            | AZ Klina                                                                                                                   | Dr. C. Vael                                                                                                                                                                                                                                                                                                                                                                                                                                                                                                                                                                                                                                             |
| EPI_ISL_1176527                                                                                                                                                                                                                                                                                                                                                                                                                                                                                                                                                                                                                                                                                                                                                                                                                                | Department of Pathology, University of Cambridge                                                                                                                                                                    | COVID-19 Genomics UK (COG-UK) Consortium                                                                                   | Aminu S. Jahun, Yasmin Chaudhry, Iliana Georgana, Myra Hosmillo, Rhys Izuagbe, William L. Hamilton, Martin D. Curran, Surendra Parmar, Ian Goodfellow                                                                                                                                                                                                                                                                                                                                                                                                                                                                                                   |
| EPI_ISL_1178405                                                                                                                                                                                                                                                                                                                                                                                                                                                                                                                                                                                                                                                                                                                                                                                                                                | Northumbria University / South Tees Hospitals NHS Foundation Trust / North Cumbria Integrated Care NHS Foundation Trust / North Tees and Hartlepool NHS Foundation Trust / Newcastle Hospitals NHS Foundation Trust | COVID-19 Genomics UK (COG-UK) Consortium                                                                                   | Darren L Smith, Andrew Nelson, Matthew Bashton, Greg R Young, Joshua Loh, John Allan, Mohammad A Tariq, Giles S Holt, Gary Black, Wen C Yew, Lynn Dover, Paul Baker, Steve Liggett, Sarah Essex, Jane Greenaway, Debra Padgett, Clive Graham, Garren Scott, Edward Barton, Emma Swindells, Brendan Payne, Jennifer Collins, Yusri Taha, Gary Eltringham                                                                                                                                                                                                                                                                                                 |
| EPI_ISL_1178423, EPI_ISL_1178527                                                                                                                                                                                                                                                                                                                                                                                                                                                                                                                                                                                                                                                                                                                                                                                                               | Quadram Institute Bioscience                                                                                                                                                                                        | COVID-19 Genomics UK (COG-UK) Consortium                                                                                   | Dave J. Baker, Gemma L. Kay, Alp Aydin, Thanh Le-Viet, Steven Rudder, Ana P. Tedim, Anastasia Kolyva, Maria Diaz, Leonardo de Oliveira Martins, Nabil-Fareed Alikhan, Lizzie Meadows, Rachael Stanley, Ngozi Elumogo, Muhammed Yasin, Nicholas M. Thomson, Alexander J Trotter, Rachel Gilroy, Samuel Bloomfield, Claire Stuart, Andrew Bell, Reenesh Prakash, Samir Dervisevic, Alison E. Mather, John Wain, Mark Webber, Andrew J. Page, Justin O'Grady                                                                                                                                                                                               |
| EPI_ISL_1179964                                                                                                                                                                                                                                                                                                                                                                                                                                                                                                                                                                                                                                                                                                                                                                                                                                | Department of Pathology, University of Cambridge                                                                                                                                                                    | COVID-19 Genomics UK (COG-UK) Consortium                                                                                   | Aminu S. Jahun, Yasmin Chaudhry, Iliana Georgana, Myra Hosmillo, Rhys Izuagbe, William L. Hamilton, Martin D. Curran, Surendra Parmar, Ian Goodfellow                                                                                                                                                                                                                                                                                                                                                                                                                                                                                                   |
| EPI_ISL_1180859, EPI_ISL_1180864, EPI_ISL_1180873, EPI_ISL_1180879                                                                                                                                                                                                                                                                                                                                                                                                                                                                                                                                                                                                                                                                                                                                                                             | Department of Laboratory Medicine, Division of Clinical Virology, University of Medicine, Vienna                                                                                                                    | Bergthaler laboratory, CeMM Research Center for Molecular Medicine of the Austrian Academy of Sciences                     | Lukas Endler, Anna Schedl, Fabian Amman, Thomas Penz, Benedikt Agerer, Maelle Le Moing, Michael Schuster, Bekir Erguner, Jan Laine, Martin Senekowitsch, Christoph Bock, Andreas Bergthaler                                                                                                                                                                                                                                                                                                                                                                                                                                                             |
| EPI_ISL_1181129, EPI_ISL_1181131, EPI_ISL_1181151, EPI_ISL_1181173                                                                                                                                                                                                                                                                                                                                                                                                                                                                                                                                                                                                                                                                                                                                                                             | genXone SA, Molecular Diagnostics Laboratory / NZOZ                                                                                                                                                                 | genXone SA, Research & Development Laboratory                                                                              | Maciej Sykulski, Grzegorz Nowicki, Jakub Grabowski, Natalia Drweska-Matelska, Anna Brylak-Blaszkow, Aleksandra Gidlewicz, Karol Szeszko, Lukasz Krych, Michal Kaszuba                                                                                                                                                                                                                                                                                                                                                                                                                                                                                   |
| EPI_ISL_1181344                                                                                                                                                                                                                                                                                                                                                                                                                                                                                                                                                                                                                                                                                                                                                                                                                                | Department of Infectious Diseases, Istituto Superiore di Sanità, Rome, Italy; AOR San Carlo, Potenza, Italy                                                                                                         | Istituto Superiore di Sanità (ISS)                                                                                         | Paola Stefanelli, Angela Di Martino, Alessandra Lo Presti, Stefano Fiore, Antonio Picerno, Lopizzo Teresa, Anna Curci, Angela Menchise, Manuela Marra, Maria Carollo, Marco Crescenzi                                                                                                                                                                                                                                                                                                                                                                                                                                                                   |
| EPI_ISL_1182027, EPI_ISL_1182028                                                                                                                                                                                                                                                                                                                                                                                                                                                                                                                                                                                                                                                                                                                                                                                                               | Connecticut DPH                                                                                                                                                                                                     | Grubaugh Lab - Yale School of Public Health                                                                                | Joseph Fauver, Mallery Breban, Isabell Ott, Tara Alpert, Mary Petrone, Anderson Brito, Chantal Vogels, Annie Watkins, Chaney Kalinich, Anthony Muyombwe, Randy Downing, Jafar Razeq, Stephen M. Bart, Nathan Grubaugh                                                                                                                                                                                                                                                                                                                                                                                                                                   |
| EPI_ISL_1182036, EPI_ISL_1182038, EPI_ISL_1182041, EPI_ISL_1182044, EPI_ISL_1182048, EPI_ISL_1182056, EPI_ISL_1182058, EPI_ISL_1182059, EPI_ISL_1182060, EPI_ISL_1182066, EPI_ISL_1182067, EPI_ISL_1182069, EPI_ISL_1182072, EPI_ISL_1182073, EPI_ISL_1182081, EPI_ISL_1182086                                                                                                                                                                                                                                                                                                                                                                                                                                                                                                                                                                 | Tempus                                                                                                                                                                                                              | Grubaugh Lab - Yale School of Public Health                                                                                | Joseph Fauver, Mallery Breban, Isabell Ott, Tara Alpert, Mary Petrone, Anderson Brito, Chantal Vogels, Annie Watkins, Chaney Kalinich, Matthew J. MacKay, Gaurav Khullar, Jessica Metti, Joel T. Dudley, Megan Nash, Nike Beaubier, Christopher E. Mason, Nathan Grubaugh                                                                                                                                                                                                                                                                                                                                                                               |
| EPI_ISL_1183101                                                                                                                                                                                                                                                                                                                                                                                                                                                                                                                                                                                                                                                                                                                                                                                                                                | Public Health Ontario Laboratory                                                                                                                                                                                    | Public Health Ontario Laboratory                                                                                           | Vanessa G Allen, Philip Banh, Yao Chen, Richard de Borja, Alireza Eshaghi, Nahuel Fittipaldi, Christine Frantz, Jonathan B Gubbay, Jennifer L Guthrie, Lawrence Heisler, Esha Joshi, Michael Laszloffy, Aimin Li, Michael CY Li, Dean Maxwell, Sandeep Nagra, Samir N Patel, Jared Simpson, Karthikeyan Sivaraman, Ashleigh Sullivan, Yogi Sundaravadanam, Sarah Teatero, Andre Villegas, Matthew Watson, Sandra Zittermann                                                                                                                                                                                                                             |
| EPI_ISL_1183995                                                                                                                                                                                                                                                                                                                                                                                                                                                                                                                                                                                                                                                                                                                                                                                                                                | Sonora Quest Laboratories                                                                                                                                                                                           | TGen North                                                                                                                 | Jolene Bowers, Heather Centner, Chris French, Hayley Yaglom, Ashlyn Pfeiffer, Darrin Lemmer, Dave Engelthaler, The Arizona COVID Genomics Union (ACGU)                                                                                                                                                                                                                                                                                                                                                                                                                                                                                                  |
| EPI_ISL_1184090                                                                                                                                                                                                                                                                                                                                                                                                                                                                                                                                                                                                                                                                                                                                                                                                                                | Arizona State University                                                                                                                                                                                            | Arizona State University                                                                                                   | Rabia Maqsood, LaRinda A. Holland, Peter T. Skidmore, Emily A. Kaelin, Nicholas J. Mellor, Kristina Buss, Joy M. Blain, Neal W Woodbury, Valerie Harris, Joshua LaBaer, Vel Murugan, Efrém S. Lim                                                                                                                                                                                                                                                                                                                                                                                                                                                       |
| EPI_ISL_1184107, EPI_ISL_1184108,                                                                                                                                                                                                                                                                                                                                                                                                                                                                                                                                                                                                                                                                                                                                                                                                              | New Jersey Department of Health, Public Health and                                                                                                                                                                  | New Jersey Public Health and Environmental Laboratories                                                                    | Lindsey Bodnar, Shiv K. Verma, Dana Woell, Byeong Jeong                                                                                                                                                                                                                                                                                                                                                                                                                                                                                                                                                                                                 |

|                                                                                                                                                                                                                                                                                                                  |                                                                                                 |                                                                                                 |                                                                                                                                                                                                                                                                                                                                                                                                                                                                                                                                                                                                                                                                                                                                                                                                                                                                                                        |
|------------------------------------------------------------------------------------------------------------------------------------------------------------------------------------------------------------------------------------------------------------------------------------------------------------------|-------------------------------------------------------------------------------------------------|-------------------------------------------------------------------------------------------------|--------------------------------------------------------------------------------------------------------------------------------------------------------------------------------------------------------------------------------------------------------------------------------------------------------------------------------------------------------------------------------------------------------------------------------------------------------------------------------------------------------------------------------------------------------------------------------------------------------------------------------------------------------------------------------------------------------------------------------------------------------------------------------------------------------------------------------------------------------------------------------------------------------|
| EPI_ISL_1184110                                                                                                                                                                                                                                                                                                  | Environmental Laboratories                                                                      |                                                                                                 | Virginia DCLS                                                                                                                                                                                                                                                                                                                                                                                                                                                                                                                                                                                                                                                                                                                                                                                                                                                                                          |
| EPI_ISL_1184168                                                                                                                                                                                                                                                                                                  | Virginia Division of Consolidated Laboratory Services                                           | Virginia Division of Consolidated Laboratory Services                                           |                                                                                                                                                                                                                                                                                                                                                                                                                                                                                                                                                                                                                                                                                                                                                                                                                                                                                                        |
| EPI_ISL_1184210                                                                                                                                                                                                                                                                                                  | Indiana Animal Disease Diagnostic Laboratory                                                    | Carpi Laboratory - Purdue University                                                            | Jack Dorman, Ilinca I Ciubotariu, Lev Gorenstein, Abebe A Fola, G Kenitra Hendrix, Rebecca P Wilkes, Giovanna Carpi                                                                                                                                                                                                                                                                                                                                                                                                                                                                                                                                                                                                                                                                                                                                                                                    |
| EPI_ISL_1184559, EPI_ISL_1184560                                                                                                                                                                                                                                                                                 | Arizona State Public Health Laboratory                                                          | Arizona State Public Health Laboratory                                                          | Trung Huynh, Jessica Escobar, Katherine Fullerton, Nobuko Fukushima, Stacy White, Linda Getsinger, Victor Waddell                                                                                                                                                                                                                                                                                                                                                                                                                                                                                                                                                                                                                                                                                                                                                                                      |
| EPI_ISL_1185790, EPI_ISL_1185798                                                                                                                                                                                                                                                                                 | Azienda Sanitaria dell'Alto Adige Laboratorio Aziendale di Microbiologia e Virologia            | Istituto di Genomica Applicata                                                                  | Elisabetta Pagani, Irene Bianconi, Elisabetta Giacobazzi, Elisa Masi, Stefanie Wieser, Irena Jurman, Vera Vendramin, Gabriele Magris, Eleonora Paparelli, Davide Scaglione, Michele Morgante                                                                                                                                                                                                                                                                                                                                                                                                                                                                                                                                                                                                                                                                                                           |
| EPI_ISL_1186029                                                                                                                                                                                                                                                                                                  | National Institute of Infectious Diseases-Prof. Dr. Matei Bals Molecular Diagnostics Laboratory | National Institute of Infectious Diseases-Prof. Dr. Matei Bals Molecular Diagnostics Laboratory | Leontina Banica, Marius Surleac, Corina Casangiu, Petre Milu, Andreea Tudor, Simona Paraschiv, Dan Otelea                                                                                                                                                                                                                                                                                                                                                                                                                                                                                                                                                                                                                                                                                                                                                                                              |
| EPI_ISL_1186166                                                                                                                                                                                                                                                                                                  | Vestfold Hospital, Toensberg Department of Microbiology                                         | Norwegian Institute of Public Health, Department of Virology                                    | Kathrine Stene-Johansen, Kamilla Heddeland Instefjord, Hilde Elshaug, Garcia Llorente Ignacio, Engebretsen Serina Beate, Pedersen Benedikte Nevjen, Debech Nadia, Atiya R Ali, Marie Paulsen Madsen, Rasmus Riis Kopperud, Hilde Vollan, Karoline Bragstad, Olav Hungnes                                                                                                                                                                                                                                                                                                                                                                                                                                                                                                                                                                                                                               |
| EPI_ISL_1186204                                                                                                                                                                                                                                                                                                  | National Institute of Infectious Diseases-Prof. Dr. Matei Bals Molecular Diagnostics Laboratory | National Institute of Infectious Diseases-Prof. Dr. Matei Bals Molecular Diagnostics Laboratory | Leontina Banica, Marius Surleac, Corina Casangiu, Petre Milu, Andreea Tudor, Simona Paraschiv, Dan Otelea                                                                                                                                                                                                                                                                                                                                                                                                                                                                                                                                                                                                                                                                                                                                                                                              |
| EPI_ISL_1186854                                                                                                                                                                                                                                                                                                  | Lighthouse Lab in Alderley Park                                                                 | Wellcome Sanger Institute for the COVID-19 Genomics UK (COG-UK) Consortium                      | Jacquelyn Wynn, Mairead Hyland, The Lighthouse Lab in Alderley Park and Alex Alderton, Roberto Amato, Jeffrey Barrett, Sonia Goncalves, Ewan Harrison, David K. Jackson, Ian Johnston, Dominic Kwiatkowski, Cordelia Langford, John Sillitoe on behalf of the Wellcome Sanger Institute COVID-19 Surveillance Team                                                                                                                                                                                                                                                                                                                                                                                                                                                                                                                                                                                     |
| EPI_ISL_1187435, EPI_ISL_1187445                                                                                                                                                                                                                                                                                 | Lighthouse Lab in Glasgow                                                                       | Wellcome Sanger Institute for the COVID-19 Genomics UK (COG-UK) Consortium                      | Harper VanSteenhouse, Yumi Kasai, David Gray, Carol Clugston, Anna Dominiczak and Alex Alderton, Roberto Amato, Jeffrey Barrett, Sonia Goncalves, Ewan Harrison, David K. Jackson, Ian Johnston, Dominic Kwiatkowski, Cordelia Langford, John Sillitoe on behalf of the Wellcome Sanger Institute COVID-19 Surveillance Team                                                                                                                                                                                                                                                                                                                                                                                                                                                                                                                                                                           |
| EPI_ISL_1187936                                                                                                                                                                                                                                                                                                  | Lighthouse Lab in Alderley Park                                                                 | Wellcome Sanger Institute for the COVID-19 Genomics UK (COG-UK) Consortium                      | Jacquelyn Wynn, Mairead Hyland, The Lighthouse Lab in Alderley Park and Alex Alderton, Roberto Amato, Jeffrey Barrett, Sonia Goncalves, Ewan Harrison, David K. Jackson, Ian Johnston, Dominic Kwiatkowski, Cordelia Langford, John Sillitoe on behalf of the Wellcome Sanger Institute COVID-19 Surveillance Team                                                                                                                                                                                                                                                                                                                                                                                                                                                                                                                                                                                     |
| EPI_ISL_1188092, EPI_ISL_1188186, EPI_ISL_1188324, EPI_ISL_1188579                                                                                                                                                                                                                                               | Lighthouse Lab in Glasgow                                                                       | Wellcome Sanger Institute for the COVID-19 Genomics UK (COG-UK) Consortium                      | Harper VanSteenhouse, Yumi Kasai, David Gray, Carol Clugston, Anna Dominiczak and Alex Alderton, Roberto Amato, Jeffrey Barrett, Sonia Goncalves, Ewan Harrison, David K. Jackson, Ian Johnston, Dominic Kwiatkowski, Cordelia Langford, John Sillitoe on behalf of the Wellcome Sanger Institute COVID-19 Surveillance Team                                                                                                                                                                                                                                                                                                                                                                                                                                                                                                                                                                           |
| EPI_ISL_1188667, EPI_ISL_1188673, EPI_ISL_1189325                                                                                                                                                                                                                                                                | Lighthouse Lab in Alderley Park                                                                 | Wellcome Sanger Institute for the COVID-19 Genomics UK (COG-UK) Consortium                      | Jacquelyn Wynn, Mairead Hyland, The Lighthouse Lab in Alderley Park and Alex Alderton, Roberto Amato, Jeffrey Barrett, Sonia Goncalves, Ewan Harrison, David K. Jackson, Ian Johnston, Dominic Kwiatkowski, Cordelia Langford, John Sillitoe on behalf of the Wellcome Sanger Institute COVID-19 Surveillance Team                                                                                                                                                                                                                                                                                                                                                                                                                                                                                                                                                                                     |
| EPI_ISL_1189640                                                                                                                                                                                                                                                                                                  | Lighthouse Lab in Milton Keynes                                                                 | Wellcome Sanger Institute for the COVID-19 Genomics UK (COG-UK) Consortium                      | The Lighthouse Lab in Milton Keynes and Alex Alderton, Roberto Amato, Jeffrey Barrett, Sonia Goncalves, Ewan Harrison, David K. Jackson, Ian Johnston, Dominic Kwiatkowski, Cordelia Langford, John Sillitoe on behalf of the Wellcome Sanger Institute COVID-19 Surveillance Team                                                                                                                                                                                                                                                                                                                                                                                                                                                                                                                                                                                                                     |
| EPI_ISL_1191132                                                                                                                                                                                                                                                                                                  | Center for Virology                                                                             | Center for Virology                                                                             | Jeremy W. Camp, Irene Goerzer, Monika Redlberger-Fritz, Stephan W. Aberle                                                                                                                                                                                                                                                                                                                                                                                                                                                                                                                                                                                                                                                                                                                                                                                                                              |
| EPI_ISL_1191598                                                                                                                                                                                                                                                                                                  | Virology Department, Victoria Hospital, Plaine-Willhems, Mauritius                              | National Institute for Communicable Diseases of the National Health Laboratory Service          | Ramuth M, Manraj SS, Sonoo J, Baboo SB, Amoako DG, Scheepers C, Mohale T, Ntuli N, Mahlangu B, Ismail A, Bhiman JN                                                                                                                                                                                                                                                                                                                                                                                                                                                                                                                                                                                                                                                                                                                                                                                     |
| EPI_ISL_1191646                                                                                                                                                                                                                                                                                                  | CNR Virus des Infections Respiratoires - France SUD                                             | CNR Virus des Infections Respiratoires - France SUD                                             | Antonin Bal, Gregory Destras, Gwendolyn Burfin, Hadrien Regue, Quentin Semanas, Martine Valette, Bruno Lina, Laurence Josset                                                                                                                                                                                                                                                                                                                                                                                                                                                                                                                                                                                                                                                                                                                                                                           |
| EPI_ISL_1191681, EPI_ISL_1191682                                                                                                                                                                                                                                                                                 | HOPITAL UNIVERSITAIRE DE FORT DE FRANCE                                                         | CNR Virus des Infections Respiratoires - France SUD                                             | Antonin Bal, Gregory Destras, Gwendolyn Burfin, Hadrien Regue, Quentin Semanas, Martine Valette, Bruno Lina, Laurence Josset                                                                                                                                                                                                                                                                                                                                                                                                                                                                                                                                                                                                                                                                                                                                                                           |
| EPI_ISL_1191685                                                                                                                                                                                                                                                                                                  | CENTRE LEON BERARD                                                                              | CNR Virus des Infections Respiratoires - France SUD                                             | Antonin Bal, Gregory Destras, Gwendolyn Burfin, Hadrien Regue, Quentin Semanas, Martine Valette, Bruno Lina, Laurence Josset                                                                                                                                                                                                                                                                                                                                                                                                                                                                                                                                                                                                                                                                                                                                                                           |
| EPI_ISL_1191690                                                                                                                                                                                                                                                                                                  | BIOMNIS LYON                                                                                    | CNR Virus des Infections Respiratoires - France SUD                                             | Antonin Bal, Gregory Destras, Gwendolyn Burfin, Hadrien Regue, Quentin Semanas, Martine Valette, Bruno Lina, Laurence Josset                                                                                                                                                                                                                                                                                                                                                                                                                                                                                                                                                                                                                                                                                                                                                                           |
| EPI_ISL_1191703, EPI_ISL_1191704                                                                                                                                                                                                                                                                                 | DYOMEDEA-NEOLAB                                                                                 | CNR Virus des Infections Respiratoires - France SUD                                             | Antonin Bal, Gregory Destras, Gwendolyn Burfin, Hadrien Regue, Quentin Semanas, Martine Valette, Bruno Lina, Laurence Josset                                                                                                                                                                                                                                                                                                                                                                                                                                                                                                                                                                                                                                                                                                                                                                           |
| EPI_ISL_1191727                                                                                                                                                                                                                                                                                                  | Coast Diagnostics                                                                               | Synergy Laboratories, Inc.                                                                      | Tina Louise Sutton-Young                                                                                                                                                                                                                                                                                                                                                                                                                                                                                                                                                                                                                                                                                                                                                                                                                                                                               |
| EPI_ISL_1191757                                                                                                                                                                                                                                                                                                  | Laboratory of virology and molecular diagnostics                                                | Laboratory of virology and molecular diagnostics                                                | Kuzmanovska Maja, Boshevka Golubinka, Janchevska Elizabeta                                                                                                                                                                                                                                                                                                                                                                                                                                                                                                                                                                                                                                                                                                                                                                                                                                             |
| EPI_ISL_1193263, EPI_ISL_1193265, EPI_ISL_1193269, EPI_ISL_1193270, EPI_ISL_1193272, EPI_ISL_1193289, EPI_ISL_1193293, EPI_ISL_1193302, EPI_ISL_1193327, EPI_ISL_1193331, EPI_ISL_1193332, EPI_ISL_1193347, EPI_ISL_1193354, EPI_ISL_1193355, EPI_ISL_1193360, EPI_ISL_1193363, EPI_ISL_1193369, EPI_ISL_1193373 | Laboratory Corporation of America                                                               | Centers for Disease Control and Prevention Division of Viral Diseases, Pathogen Discovery       | Peter W. Cook, Dakota Howard, Dhvani Batra, Ben L. Rambo-Martin, Minoo Agarwal, Eyad Almasri Debbie Boles, Ayla Burns, Nuthawin Charoensri, Oren Cohen, Susan Countryman, Mary Ann Cristobal, Bobbi Croy, Suzanne Dale, Hrushikesh Deshmukh, Amanda Douglas, Vincent Drouillon, Marcia Eisenberg, Howard Engler, Rama Ghatti, Prashant Gupta, Susan Hicks, Jake Humphrey, Lax Iyer, Manoj Jain, Mohan Kolli, Brian Krueger, Tim Kuphal, Stanley Letovsky, Michael Levandoski, Craig Lukasik, Jonathan Meltzer, Brian Norvell, Mindy Nye, Scott Parker, Christos Petropoulos, John Pruitt, Steven Ragan, Scott Ryan, Mike Sapeta, Jana Schroth, Suresh Babu Selvaraju, Goran Stevovic, Amanda Suchanek, Andrea Throop, Lyndon Tilson, Thomas Urban, Joe Voshell, Kimberly Wagner, Jonathan Williams, Mary Williamson, Qian Zeng, Tricia Zwiefelhofer, Clinton R. Paden, Suxiang Tong, Duncan MacCannell |
| EPI_ISL_1194385, EPI_ISL_1194388, EPI_ISL_1194395, EPI_ISL_1194406, EPI_ISL_1194407, EPI_ISL_1194417, EPI_ISL_1194422, EPI_ISL_1194425, EPI_ISL_1194429, EPI_ISL_1194435, EPI_ISL_1194447, EPI_ISL_1194461, EPI_ISL_1194488, EPI_ISL_1194509, EPI_ISL_1194559, EPI_ISL_1194561, EPI_ISL_1194564, EPI_ISL_1194570 | Quest Diagnostics Incorporated                                                                  | Centers for Disease Control and Prevention Division of Viral Diseases, Pathogen Discovery       | Peter W. Cook, Dakota Howard, Dhvani Batra, Ben L. Rambo-Martin, S. H. Rosenthal, A. Gerasimova, R. M. Kagan, B. Anderson, M. Hua, Y. Liu, L.E. Bernstein, K.E. Livingston, A. Perez, I. A. Shlyakhter, R. V. Rolando, R. Owen, P. Tanpaiboon, F. Lacbawan, Clinton R. Paden, Suxiang Tong, Duncan MacCannell                                                                                                                                                                                                                                                                                                                                                                                                                                                                                                                                                                                          |
| EPI_ISL_1194629                                                                                                                                                                                                                                                                                                  | Departamento de Microbiología, CDB, Hospital Clinic, Barcelona                                  | SeqCOVID-SPAIN consortium/IBV(CSIC)                                                             | Andrea Vergara, Mikel Martínez, Elisa Rubio, Jéssica Navero, Aida Peiró and SeqCOVID-SPAIN consortium                                                                                                                                                                                                                                                                                                                                                                                                                                                                                                                                                                                                                                                                                                                                                                                                  |
| EPI_ISL_1194735, EPI_ISL_1194738, EPI_ISL_1194747, EPI_ISL_1194771, EPI_ISL_1194777, EPI_ISL_1194778, EPI_ISL_1194784, EPI_ISL_1194788, EPI_ISL_1194792, EPI_ISL_1194811, EPI_ISL_1194824, EPI_ISL_1194828, EPI_ISL_1194833, EPI_ISL_1194846, EPI_ISL_1194854, EPI_ISL_1194865                                   | see above                                                                                       | Centers for Disease Control and Prevention Division of Viral Diseases, Pathogen Discovery       | Peter W. Cook, Dakota Howard, Dhvani Batra, Ben L. Rambo-Martin, Eileen de Feo, Jan Antico, Christine Tran, Matthew Tolentino, Shannon Wickline, Kim Gietzen, Brad Sickler, Jingtao Liu, Eric Allen, Phil Febbo, Sumner Galloway, Nicole L. Washington, Simon White, Geraint Levan, Kelly Schiabor Barrett, Elizabeth Cirulli, Alexandre Bolze, Ary Ascencio, Charlotte Rivera-García, Ryan Cho, Jason Nguyen, Sherry Wang, Jimmy Ramirez, Tyler Cassens, Efrén Sandoval, Magnus Isaksson, William Lee, David Becker, Marc Laurent, James Lu, Clinton R. Paden, Suxiang Tong, Duncan MacCannell                                                                                                                                                                                                                                                                                                        |
| EPI_ISL_1195008, EPI_ISL_1195017, EPI_ISL_1195044                                                                                                                                                                                                                                                                | Viollier AG                                                                                     | Department of Biosystems Science and Engineering, ETH Zürich                                    | Chaoran Chen, Sarah Nadeau, Ivan Topolsky, Emmanouil Dermizakis, Keith Harshman, Ioannis Xenarios, Henri Pegeot, Lorenzo Cerutti, Deborah Penet, Philipp Jablonski, Lara Fuhrmann, David Dreifuss, Katharina Jahn, Christiane Beckmann, Maurice Redondo, Olivier Kobel, Christoph Noppen, Sophie Seidel, Noemie Santamaria de Souza, Niko Beerenwinkel, Tanja Stadler                                                                                                                                                                                                                                                                                                                                                                                                                                                                                                                                  |
| EPI_ISL_1195225                                                                                                                                                                                                                                                                                                  | Hospital Universitari Vall d'Hebron - Vall d'Hebron Institut de Recerca                         | Hospital Universitari Vall d'Hebron - Vall d'Hebron Institut de Recerca                         | Cristina Andrés, Maria Piñana, Josep F Abril, Damir Garcia-Cehic, Ariadna Rando, Juliana Esperalba, Maria Gema Codina, Carla Castillo, Maria Carmen Martín, Tomás Pumarola, Josep Quer, Andrés Antón                                                                                                                                                                                                                                                                                                                                                                                                                                                                                                                                                                                                                                                                                                   |
| EPI_ISL_1195447, EPI_ISL_1195454, EPI_ISL_1195459                                                                                                                                                                                                                                                                | SC Microbiologia e Virologia AOUSS                                                              | AMES Centro Poliagnostico Strumentale S.r.l.                                                    | Gabriele Ibba, Rosangela Sau, Flavia Angioj, Marcello Abbondio, Salvatore Rubino, Sergio Uzzau.                                                                                                                                                                                                                                                                                                                                                                                                                                                                                                                                                                                                                                                                                                                                                                                                        |
| EPI_ISL_1195592, EPI_ISL_1195609                                                                                                                                                                                                                                                                                 | Hospital Universitario 12 de Octubre                                                            | SeqCOVID-SPAIN consortium/IBV(CSIC)                                                             | Esther Viedma, Raúl Recio, Irene Muñoz-Gallego, Jennifer Villa, Rafael Delgado, M <sup>a</sup> Dolores Folgueira and SeqCOVID-SPAIN consortiumconsortium                                                                                                                                                                                                                                                                                                                                                                                                                                                                                                                                                                                                                                                                                                                                               |
| EPI_ISL_1195676                                                                                                                                                                                                                                                                                                  | Croatian Institute of Public Health                                                             | Croatian Institute of Public Health                                                             | Irena Tabain, Ivana Ferenak                                                                                                                                                                                                                                                                                                                                                                                                                                                                                                                                                                                                                                                                                                                                                                                                                                                                            |
| EPI_ISL_1195694                                                                                                                                                                                                                                                                                                  | Public Health Institute of Osijek-Baranja County                                                | Croatian Institute of Public Health                                                             | Irena Tabain, Ivana Ferenak                                                                                                                                                                                                                                                                                                                                                                                                                                                                                                                                                                                                                                                                                                                                                                                                                                                                            |

|                                                                                                                                                                                                                                                               |                                                                                                                                       |                                                                                                                                                                       |                                                                                                                                                                                                                                                                                                                                                          |
|---------------------------------------------------------------------------------------------------------------------------------------------------------------------------------------------------------------------------------------------------------------|---------------------------------------------------------------------------------------------------------------------------------------|-----------------------------------------------------------------------------------------------------------------------------------------------------------------------|----------------------------------------------------------------------------------------------------------------------------------------------------------------------------------------------------------------------------------------------------------------------------------------------------------------------------------------------------------|
| EPI_ISL_1195709, EPI_ISL_1195710                                                                                                                                                                                                                              | Teaching Institute of Public Health of Split-Dalmatia County                                                                          | Croatian Institute of Public Health                                                                                                                                   | Irena Tabain, Ivana Ferenak                                                                                                                                                                                                                                                                                                                              |
| EPI_ISL_1195748, EPI_ISL_1195750, EPI_ISL_1195752, EPI_ISL_1195764, EPI_ISL_1195772, EPI_ISL_1195791, EPI_ISL_1195816, EPI_ISL_1195818, EPI_ISL_1195822, EPI_ISL_1195829, EPI_ISL_1195853, EPI_ISL_1195872, EPI_ISL_1195877, EPI_ISL_1195878, EPI_ISL_1195902 | see above                                                                                                                             | NYU Langone Health                                                                                                                                                    | Departments of Pathology and Medicine, New York University School of Medicine                                                                                                                                                                                                                                                                            |
| EPI_ISL_1195952                                                                                                                                                                                                                                               | Laboratorio Genzano - ASL RM 10                                                                                                       | INMI Lazzaro Spallanzani IRCCS                                                                                                                                        | M Ruca, O Butera, CEM Gruber, B Bartolini, E Giombini, F Messina, G Tramini, E Conti, A Di Caro, MR Capobianchi                                                                                                                                                                                                                                          |
| EPI_ISL_1196428                                                                                                                                                                                                                                               | CLINICA BIBLICA                                                                                                                       | Incienza, Instituto Costarricense de Investigación y Enseñanza en Nutrición y Salud                                                                                   | Francisco Duarte, Hebleen Porras, Claudio Soto-Garita, Estela Cordero, Adriana Godínez, Melany Calderón & Karla Gutiérrez-González                                                                                                                                                                                                                       |
| EPI_ISL_1196714, EPI_ISL_1196737                                                                                                                                                                                                                              | Wojewodzka Stacja Sanitarno-Epidemiologiczna w Olsztynie, Laboratorium Badan Epidemiologiczno-Klinicznych                             | Wojewodzka Stacja Sanitarno-Epidemiologiczna w Olsztynie, Laboratorium Badan Epidemiologiczno-Klinicznych                                                             | Sylvia Krzetowska, Monika Czerminska, Ewa Liszewska, Tomasz Jakubczak, Marta Lukian, Patryk Bielecki, Aleksandra Kobiatko, Emilia Tarabas, Paulina Rozycka, Barbara Dolinska                                                                                                                                                                             |
| EPI_ISL_1196878, EPI_ISL_1196879                                                                                                                                                                                                                              | LA Office of Public Health Laboratories                                                                                               | Pathogen Discovery, Respiratory Viruses Branch, Division of Viral Diseases, Centers for Disease Control and Prevention                                                | Ying Tao, Jing Zhang, Yan Li, Brian Lynch, Anna Kelleher, Krista Queen, Anna Uehara, Peter Cook, Han Jia Justin Ng, Clinton R. Paden, Haibin Wang, Suxiang Tong                                                                                                                                                                                          |
| EPI_ISL_1197037                                                                                                                                                                                                                                               | Laboratoire de virologie clinique - Institut Pasteur de Tunis                                                                         | 1-Laboratory of Microbiology, National Reference Lab, Charles Nicolle Hospital; 2-University of Tunis ElManar, Faculty of Medicine of Tunis, LR99ES09, Tunis, Tunisia | Sameh Trabelsi, Nissaf Ben Alaya, Mouna Ben Sassi, Sana Ferjani, Mouna Safer, Salma Abid, Fares Wasfi, Mariem Gdoura, Sondes Haddad, Anissa Chouikha, Roua Ben Othman, Sara Chammmam, Ines M dini, Manel Ben Sassi, Imen Kacem, Maher Kharrat, Alia BenKahla, Jalila Ben Kheili, Riadh Daghfous, Riadh Gouider, Henda Triki, Ilhem Boutiba-Ben Boubaker. |
| EPI_ISL_1197061                                                                                                                                                                                                                                               | Flow Diagnostics Lab                                                                                                                  | Los Angeles County PHL                                                                                                                                                | P. Hemarajata et al.                                                                                                                                                                                                                                                                                                                                     |
| EPI_ISL_1198824                                                                                                                                                                                                                                               | SARS-CoV-2 testing team, National Institute of Infectious Diseases                                                                    | Pathogen Genomics Center, National Institute of Infectious Diseases                                                                                                   | Tsuyoshi Sekizuka, Kentaro Itokawa, Rina Tanaka, Masanori Hashino, Daisuke Kobayashi, Kento Fukano, Hussein H. Aly, Takanobu Kato, Makoto Kuroda                                                                                                                                                                                                         |
| EPI_ISL_1198827                                                                                                                                                                                                                                               | SARS-CoV-2 testing team, National Institute of Infectious Diseases                                                                    | Pathogen Genomics Center, National Institute of Infectious Diseases                                                                                                   | Tsuyoshi Sekizuka, Kentaro Itokawa, Rina Tanaka, Masanori Hashino, Daisuke Kobayashi, Kousho Wakae, Hussein H. Aly, Takanobu Kato, Makoto Kuroda                                                                                                                                                                                                         |
| EPI_ISL_1199386                                                                                                                                                                                                                                               | Department of Infectious Diseases, Istituto Superiore di Sanità, Rome, Italy; L.C. Laboratori Campisi s.r.l., Siracusa, Sicily, Italy | Istituto Superiore di Sanità (ISS)                                                                                                                                    | Paola Stefanelli, Angela Di Martino, Alessandra Lo Presti, Stefano Fiore, Campisi Corrado, Iemmolo Rosario, Manuela Marra, Maria Carollo, Marco Crescenzi                                                                                                                                                                                                |
| EPI_ISL_1200538                                                                                                                                                                                                                                               | DOHMH PHL                                                                                                                             | New York City Public Health Laboratory                                                                                                                                | Jade Wang, et al.                                                                                                                                                                                                                                                                                                                                        |
| EPI_ISL_1200549                                                                                                                                                                                                                                               | OCME Office Of Chief Medical Examiner                                                                                                 | New York City Public Health Laboratory                                                                                                                                | Jade Wang, et al.                                                                                                                                                                                                                                                                                                                                        |
| EPI_ISL_1200551                                                                                                                                                                                                                                               | DOHMH Jamaica                                                                                                                         | New York City Public Health Laboratory                                                                                                                                | Jade Wang, et al.                                                                                                                                                                                                                                                                                                                                        |
| EPI_ISL_1200552                                                                                                                                                                                                                                               | DOHMH Central Harlem                                                                                                                  | New York City Public Health Laboratory                                                                                                                                | Jade Wang, et al.                                                                                                                                                                                                                                                                                                                                        |
| EPI_ISL_1200553                                                                                                                                                                                                                                               | DOHMH Jamaica                                                                                                                         | New York City Public Health Laboratory                                                                                                                                | Jade Wang, et al.                                                                                                                                                                                                                                                                                                                                        |
| EPI_ISL_1200555                                                                                                                                                                                                                                               | OCME Office Of Chief Medical Examiner                                                                                                 | New York City Public Health Laboratory                                                                                                                                | Jade Wang, et al.                                                                                                                                                                                                                                                                                                                                        |
| EPI_ISL_1200635, EPI_ISL_1200637                                                                                                                                                                                                                              | Department of Infectious Diseases, Istituto Superiore di Sanità, Rome, Italy; AOR San Carlo, Potenza, Italy                           | Department of Infectious Diseases, Istituto Superiore di Sanità                                                                                                       | Paola Stefanelli, Angela Di Martino, Alessandra Lo Presti, Stefano Fiore, Antonio Picerno, Lopizzo Teresa, Anna Curci, Angela Menchise, Manuela Marra, Maria Carollo, Marco Crescenzi                                                                                                                                                                    |
| EPI_ISL_1200645, EPI_ISL_1200650                                                                                                                                                                                                                              | MEPHI, Aix Marseille University                                                                                                       | MEPHI, Aix Marseille University                                                                                                                                       | Anthony LEVASSEUR                                                                                                                                                                                                                                                                                                                                        |
| EPI_ISL_1200702, EPI_ISL_1200795, EPI_ISL_1200808, EPI_ISL_1200833                                                                                                                                                                                            | BIOMNIS LYON                                                                                                                          | CNR Virus des Infections Respiratoires - France SUD                                                                                                                   | Antonin Bal, Gregory Destras, Gwendolynne Burfin, Hadrien Regue, Quentin Semanas, Martine Valette, Bruno Lina, Laurence Josset                                                                                                                                                                                                                           |
| EPI_ISL_1200840, EPI_ISL_1200853                                                                                                                                                                                                                              | HOPITAL SAINT ANDRE                                                                                                                   | CNR Virus des Infections Respiratoires - France SUD                                                                                                                   | Antonin Bal, Gregory Destras, Gwendolynne Burfin, Hadrien Regue, Quentin Semanas, Martine Valette, Bruno Lina, Laurence Josset                                                                                                                                                                                                                           |
| EPI_ISL_1201217, EPI_ISL_1201224, EPI_ISL_1201241, EPI_ISL_1201254, EPI_ISL_1201259, EPI_ISL_1201265, EPI_ISL_1201269                                                                                                                                         | Hospital General Universitario Gregorio Marañón                                                                                       | Hospital General Universitario Gregorio Marañón                                                                                                                       | "Sergio Buenestado Serrano, Pedro Sola Campoy, Laura Pérez-Lago, Cristina Rodríguez-Grande, Pilar Catalán, Patricia Muñoz, Darío García de Viedma"                                                                                                                                                                                                       |
| EPI_ISL_1201565, EPI_ISL_1201573, EPI_ISL_1201611, EPI_ISL_1201613, EPI_ISL_1201617, EPI_ISL_1201622, EPI_ISL_1201635                                                                                                                                         | Regionalne Centrum Krwiodawstwa i Krwiolecznictwa w Biaymstoku Pracownia Diagnostyki Molekularnej wirusa SARS-CoV-2                   | 1. National Institute of Public Health - National Institute of Hygiene; 2. Eurofins Genomics Europe Sequencing GmbH                                                   | Wokowicz Tomasz, Zacharczuk Katarzyna, Sadkowska-Todys Magorzata, Gierczyki Rafa, Eurofins Genomics Europe Sequencing Team, ECDC COVID-19 WGS support team                                                                                                                                                                                               |
| EPI_ISL_1201652                                                                                                                                                                                                                                               | WSSE Biaystok                                                                                                                         | 1. National Institute of Public Health - National Institute of Hygiene; 2. Eurofins Genomics Europe Sequencing GmbH                                                   | Wokowicz Tomasz, Zacharczuk Katarzyna, Sadkowska-Todys Magorzata, Gierczyki Rafa, Eurofins Genomics Europe Sequencing Team, ECDC COVID-19 WGS support team                                                                                                                                                                                               |
| EPI_ISL_1201663                                                                                                                                                                                                                                               | Cell-t                                                                                                                                | 1. National Institute of Public Health - National Institute of Hygiene; 2. Eurofins Genomics Europe Sequencing GmbH                                                   | Wokowicz Tomasz, Zacharczuk Katarzyna, Sadkowska-Todys Magorzata, Gierczyki Rafa, Eurofins Genomics Europe Sequencing Team, ECDC COVID-19 WGS support team                                                                                                                                                                                               |
| EPI_ISL_1201672                                                                                                                                                                                                                                               | WSSE                                                                                                                                  | 1. National Institute of Public Health - National Institute of Hygiene; 2. Eurofins Genomics Europe Sequencing GmbH                                                   | Wokowicz Tomasz, Zacharczuk Katarzyna, Sadkowska-Todys Magorzata, Gierczyki Rafa, Eurofins Genomics Europe Sequencing Team, ECDC COVID-19 WGS support team                                                                                                                                                                                               |
| EPI_ISL_1201689                                                                                                                                                                                                                                               | Bruss                                                                                                                                 | 1. National Institute of Public Health - National Institute of Hygiene; 2. Eurofins Genomics Europe Sequencing GmbH                                                   | Wokowicz Tomasz, Zacharczuk Katarzyna, Sadkowska-Todys Magorzata, Gierczyki Rafa, Eurofins Genomics Europe Sequencing Team, ECDC COVID-19 WGS support team                                                                                                                                                                                               |
| EPI_ISL_1201696, EPI_ISL_1201708                                                                                                                                                                                                                              | UCK                                                                                                                                   | 1. National Institute of Public Health - National Institute of Hygiene; 2. Eurofins Genomics Europe Sequencing GmbH                                                   | Wokowicz Tomasz, Zacharczuk Katarzyna, Sadkowska-Todys Magorzata, Gierczyki Rafa, Eurofins Genomics Europe Sequencing Team, ECDC COVID-19 WGS support team                                                                                                                                                                                               |
| EPI_ISL_1201724, EPI_ISL_1201735, EPI_ISL_1201739, EPI_ISL_1201743, EPI_ISL_1201745, EPI_ISL_1201746                                                                                                                                                          | WSSE Olsztyn                                                                                                                          | 1. National Institute of Public Health - National Institute of Hygiene; 2. Eurofins Genomics Europe Sequencing GmbH                                                   | Wokowicz Tomasz, Zacharczuk Katarzyna, Sadkowska-Todys Magorzata, Gierczyki Rafa, Eurofins Genomics Europe Sequencing Team, ECDC COVID-19 WGS support team                                                                                                                                                                                               |
| EPI_ISL_1201751, EPI_ISL_1201752                                                                                                                                                                                                                              | OM WSSE Wroclaw                                                                                                                       | 1. National Institute of Public Health - National Institute of Hygiene; 2. Eurofins Genomics Europe Sequencing GmbH                                                   | Wokowicz Tomasz, Zacharczuk Katarzyna, Sadkowska-Todys Magorzata, Gierczyki Rafa, Eurofins Genomics Europe Sequencing Team, ECDC COVID-19 WGS support team                                                                                                                                                                                               |
| EPI_ISL_1201799                                                                                                                                                                                                                                               | BIOMNIS LYON                                                                                                                          | CNR Virus des Infections Respiratoires - France SUD                                                                                                                   | Antonin Bal, Gregory Destras, Gwendolynne Burfin, Hadrien Regue, Quentin Semanas, Martine Valette, Bruno Lina, Laurence Josset                                                                                                                                                                                                                           |
| EPI_ISL_1201894, EPI_ISL_1201896                                                                                                                                                                                                                              | Diagnosticos da America - DASA                                                                                                        | Instituto Adolfo Lutz, Interdisciplinary Procedures Center, Strategic Laboratory                                                                                      | Claudio Tavares Sacchi, Claudia Regina Gonçalves, Erica Valessa Ramos Gomes, Karoline Rodrigues Campos, Caio Vinicius Dias Lopes                                                                                                                                                                                                                         |
| EPI_ISL_1203822, EPI_ISL_1203823, EPI_ISL_1203824, EPI_ISL_1203831, EPI_ISL_1203832, EPI_ISL_1203834, EPI_ISL_1203835, EPI_ISL_1203837, EPI_ISL_1203838, EPI_ISL_1203839, EPI_ISL_1203840, EPI_ISL_1203842                                                    | see above                                                                                                                             | The Jackson Laboratory                                                                                                                                                | Lloyd M, Sanderson B, Srivastava A, Maurya R, Renzette N, Omerza G, Kelly K, Li L, Wei C L, Adams M                                                                                                                                                                                                                                                      |
| EPI_ISL_1205784                                                                                                                                                                                                                                               | Lighthouse Lab in Milton Keynes                                                                                                       | Wellcome Sanger Institute for the COVID-19 Genomics UK (COG-UK) Consortium                                                                                            | The Lighthouse Lab in Milton Keynes and Alex Alderton, Roberto Amato, Jeffrey Barrett, Sonia Goncalves, Ewan Harrison, David K. Jackson, Ian Johnston, Dominic Kwiatkowski, Cordelia Langford, John Sillitoe on behalf of the Wellcome Sanger Institute COVID-19 Surveillance Team                                                                       |
| EPI_ISL_1206245, EPI_ISL_1206471                                                                                                                                                                                                                              | Lighthouse Lab in Cambridge                                                                                                           | Wellcome Sanger Institute for the COVID-19 Genomics UK (COG-UK) Consortium                                                                                            | Rob Howes, The Lighthouse Lab in Cambridge and Alex Alderton, Roberto Amato, Jeffrey Barrett, Sonia Goncalves, Ewan Harrison, David K. Jackson, Ian Johnston, Dominic Kwiatkowski, Cordelia Langford, John Sillitoe on behalf of the Wellcome Sanger Institute COVID-19 Surveillance Team                                                                |
| EPI_ISL_1206930                                                                                                                                                                                                                                               | Lighthouse Lab in Alderley Park                                                                                                       | Wellcome Sanger Institute for the COVID-19 Genomics UK (COG-UK) Consortium                                                                                            | Jacquelyn Wynn, Mairead Hyland, The Lighthouse Lab in Alderley Park and Alex Alderton, Roberto Amato, Jeffrey Barrett, Sonia Goncalves, Ewan Harrison, David K. Jackson, Ian Johnston, Dominic Kwiatkowski, Cordelia Langford, John Sillitoe on behalf of the Wellcome Sanger Institute COVID-19 Surveillance Team                                       |

|                                                                                                                                        |                                                                                                                                                   |                                                                                                                                                   |                                                                                                                                                                                                                                                                                                                                                                                                                                                                                                 |
|----------------------------------------------------------------------------------------------------------------------------------------|---------------------------------------------------------------------------------------------------------------------------------------------------|---------------------------------------------------------------------------------------------------------------------------------------------------|-------------------------------------------------------------------------------------------------------------------------------------------------------------------------------------------------------------------------------------------------------------------------------------------------------------------------------------------------------------------------------------------------------------------------------------------------------------------------------------------------|
| EPI_ISL_1207273                                                                                                                        | Lighthouse Lab in Glasgow                                                                                                                         | Wellcome Sanger Institute for the COVID-19 Genomics UK (COG-UK) Consortium                                                                        | Harper VanSteenhouse, Yumi Kasai, David Gray, Carol Clugston, Anna Dominiczak and Alex Alderton, Roberto Amato, Jeffrey Barrett, Sonia Goncalves, Ewan Harrison, David K. Jackson, Ian Johnston, Dominic Kwiatkowski, Cordelia Langford, John Sillitoe on behalf of the Wellcome Sanger Institute COVID-19 Surveillance Team                                                                                                                                                                    |
| EPI_ISL_1207285, EPI_ISL_1207516                                                                                                       | Lighthouse Lab in Alderley Park                                                                                                                   | Wellcome Sanger Institute for the COVID-19 Genomics UK (COG-UK) Consortium                                                                        | Jacquelyn Wynn, Mairead Hyland, The Lighthouse Lab in Alderley Park and Alex Alderton, Roberto Amato, Jeffrey Barrett, Sonia Goncalves, Ewan Harrison, David K. Jackson, Ian Johnston, Dominic Kwiatkowski, Cordelia Langford, John Sillitoe on behalf of the Wellcome Sanger Institute COVID-19 Surveillance Team                                                                                                                                                                              |
| EPI_ISL_1207793                                                                                                                        | Lighthouse Lab in Milton Keynes                                                                                                                   | Wellcome Sanger Institute for the COVID-19 Genomics UK (COG-UK) Consortium                                                                        | The Lighthouse Lab in Milton Keynes and Alex Alderton, Roberto Amato, Jeffrey Barrett, Sonia Goncalves, Ewan Harrison, David K. Jackson, Ian Johnston, Dominic Kwiatkowski, Cordelia Langford, John Sillitoe on behalf of the Wellcome Sanger Institute COVID-19 Surveillance Team                                                                                                                                                                                                              |
| EPI_ISL_1208414, EPI_ISL_1208453, EPI_ISL_1208473, EPI_ISL_1208536                                                                     | Microbiology Department, Laboratori Clínic Metropolitana Nord. Hospital Universitari Germans Trias i Pujol.                                       | Can Ruti SARS-CoV-2 Sequencing Hub (HUGTiP/IrsiCaixa/IGTP)                                                                                        | Marc Noguera-Julian, Pilar Armengol, Ignacio Blanco, Antoni E Bordoy, Francesc Catala-Moll, Pere-Joan Cardona, Julia G Prado, Carol Galvez Maria Casadellà, Cristina Casañ, Gemma Clara, Irina Pey, Jordi Barretina, Bonaventura Clotet, Cristina Esteban, Montserrat Giménez, Mercedes Guerrero, Anna Not, Roger Paredes, Mariona Parera, Verónica Saludes, Alba Sánchez, and Elisa Martró on behalf of the Can Ruti SARS-CoV-2 Sequencing Hub.                                                |
| EPI_ISL_1208583, EPI_ISL_1208598, EPI_ISL_1208649                                                                                      | Microbiology Department, Laboratori Clínic Metropolitana Nord. Hospital Universitari Germans Trias i Pujol.                                       | Can Ruti SARS-CoV-2 Sequencing Hub (HUGTiP/IrsiCaixa/IGTP)                                                                                        | Marc Noguera-Julian, Pilar Armengol, Ignacio Blanco, Antoni E Bordoy, Francesc Catala-Moll, Pere-Joan Cardona, Julia G Prado, Carol Galvez Maria Casadellà, Cristina Casañ, Gemma Clara, Irina Pey, Jordi Barretina, Bonaventura Clotet, Cristina Esteban, Montserrat Giménez, Mercedes Guerrero, Anna Not, Roger Paredes, Mariona Parera, Verónica Saludes, Alba Sánchez, Jose Francisco Sánchez, Lauro Sumoy, and Elisa Martró on behalf of the Can Ruti SARS-CoV-2 Sequencing Hub.           |
| EPI_ISL_1208672, EPI_ISL_1208741                                                                                                       | Microbiology Department, Laboratori Clínic Metropolitana Nord. Hospital Universitari Germans Trias i Pujol.                                       | Can Ruti SARS-CoV-2 Sequencing Hub (HUGTiP/IrsiCaixa/IGTP)                                                                                        | Marc Noguera-Julian, Pilar Armengol, Ignacio Blanco, Antoni E Bordoy, Francesc Catala-Moll, Pere-Joan Cardona, Julia G Prado, Carol Galvez Maria Casadellà, Cristina Casañ, Gemma Clara, Irina Pey, Jordi Barretina, Bonaventura Clotet, Cristina Esteban, Montserrat Giménez, Mercedes Guerrero, Anna Not, Roger Paredes, Mariona Parera, Verónica Saludes, Alba Sánchez, and Elisa Martró on behalf of the Can Ruti SARS-CoV-2 Sequencing Hub.                                                |
| EPI_ISL_1209274                                                                                                                        | Department of Laboratory Medicine, Division of Clinical Virology, University of Medicine, Vienna                                                  | Bergthaler laboratory, CeMM Research Center for Molecular Medicine of the Austrian Academy of Sciences                                            | Lukas Endler, Anna Schedl, Fabian Amman, Thomas Penz, Benedikt Agerer, Maelle Le Moing, Michael Schuster, Bekir Erguner, Jan Laine, Martin Senekowitsch, Christoph Bock, Andreas Bergthaler                                                                                                                                                                                                                                                                                                     |
| EPI_ISL_1209359                                                                                                                        | Institute for Water Quality and Resource Management, Technical University Vienna                                                                  | Bergthaler laboratory, CeMM Research Center for Molecular Medicine of the Austrian Academy of Sciences                                            | Lukas Endler, Anna Schedl, Fabian Amman, Thomas Penz, Benedikt Agerer, Maelle Le Moing, Michael Schuster, Bekir Erguner, Jan Laine, Martin Senekowitsch, Christoph Bock, Andreas Bergthaler                                                                                                                                                                                                                                                                                                     |
| EPI_ISL_1209407                                                                                                                        | Laboratory for HIV and opportunistic infections diagnosis The Republican Research and Practical Center for Epidemiology and Microbiology (RRPCEM) | Laboratory for HIV and opportunistic infections diagnosis The Republican Research and Practical Center for Epidemiology and Microbiology (RRPCEM) | Elena Gasich, Kirill Bulda, Artur Akhremchuk, Leonid Valentovich, Anatoly Krasko, Vladimir Gorbunov                                                                                                                                                                                                                                                                                                                                                                                             |
| EPI_ISL_1209492, EPI_ISL_1209612, EPI_ISL_1209618, EPI_ISL_1209799                                                                     | Israel Central Virology laboratory                                                                                                                | Israel National Consortium for SARS-CoV-2 sequencing                                                                                              | Neta Zuckerman, Efrat Dahan Bucris, Michal Mandelboim, Dana Bar-Ilan, Oran Erster, Tzvia Mann, Omer Murik, David A. Zeevi, Assaf Rokney, Joseph Jaffe, Eva Nachum, Maya Davidovich Cohen, Ephraim Fass, Gal Zizelski Valenci, Mor Rubinstein, Efrat Rorman, Israel Nissan, Efrat Glick-Saar, Omri Nayshool, Gideon Rechavi, Ella Mendelson, Orna Mor                                                                                                                                            |
| EPI_ISL_1211609, EPI_ISL_1211613                                                                                                       | Ministry of Health Turkey                                                                                                                         | Ministry of Health Turkey                                                                                                                         | Fatma Bayrakdar, Yasemin Cogun, Süleyman Yalcin, Gülay Korukluolu                                                                                                                                                                                                                                                                                                                                                                                                                               |
| EPI_ISL_1212626                                                                                                                        | Università degli Studi di Perugia                                                                                                                 | Istituto Zooprofilattico Sperimentale dell'Abruzzo e Molise "G. Caporale"                                                                         | Mencacci A., Camilloni B., Lorusso A, Marcacci M, Di Domenico M, Ancora M, Curini V, Mangone I, Rinaldi A, Scialabba S, Di Pasquale A, Cammà C, Puglia I, Calistri P, Savini G                                                                                                                                                                                                                                                                                                                  |
| EPI_ISL_1212675, EPI_ISL_1212681, EPI_ISL_1212686, EPI_ISL_1212691                                                                     | Istituto Zooprofilattico Sperimentale Umbria e Marche "Togo Rosati"                                                                               | Istituto Zooprofilattico Sperimentale dell'Abruzzo e Molise "G. Caporale"                                                                         | Biagetti M., Giammarioli M., Lorusso A, Marcacci M, Di Domenico M, Ancora M, Curini V, Mangone I, Rinaldi A, Scialabba S, Di Pasquale A, Cammà C, Puglia I, Calistri P, Savini G                                                                                                                                                                                                                                                                                                                |
| EPI_ISL_1216877                                                                                                                        | Hospital Universitari Vall d'Hebron - Vall d'Hebron Institut de Recerca                                                                           | Hospital Universitari Vall d'Hebron - Vall d'Hebron Institut de Recerca                                                                           | Cristina Andrés, Maria Piñanosa, Josep F Abril, Damir Garcia-Cehic, Ariadna Rando, Juliàna Esperalba, Maria Gema Codina, Carla Castillo, Maria Carmen Martin, Tomás Pumarola, Josep Quer, Andrés Antón                                                                                                                                                                                                                                                                                          |
| EPI_ISL_1218689, EPI_ISL_1218739, EPI_ISL_1218976, EPI_ISL_1219000                                                                     | Florida Bureau of Public Health Laboratories                                                                                                      | Florida Bureau of Public Health Laboratories                                                                                                      | Sarah Schmedes, Jason Blanton                                                                                                                                                                                                                                                                                                                                                                                                                                                                   |
| EPI_ISL_1219806                                                                                                                        | South Dakota Public Health Laboratory                                                                                                             | South Dakota Public Health Laboratory                                                                                                             | Jacob Garfin and Chris Carlson                                                                                                                                                                                                                                                                                                                                                                                                                                                                  |
| EPI_ISL_1219932                                                                                                                        | Hopital                                                                                                                                           | National Reference Center for Viruses of Respiratory Infections, Institut Pasteur, Paris                                                          | Marion Barbet, Sylvie Behillil, Méline Bizard, Angela Brisebarre, Camille Capel, Etienne Simon-Lorière, Vincent Enouf, Maud Vanpeene, Sylvie van der Werf, Delamare Catherine                                                                                                                                                                                                                                                                                                                   |
| EPI_ISL_1220237, EPI_ISL_1220300                                                                                                       | BIOMNIS LYON                                                                                                                                      | CNR Virus des Infections Respiratoires - France SUD                                                                                               | Antonin Bal, Gregory Destras, Gwendolynne Burfin, Hadrien Regue, Quentin Semanas, Martine Valette, Bruno Lina, Laurence Josset                                                                                                                                                                                                                                                                                                                                                                  |
| EPI_ISL_1220318                                                                                                                        | GH BORDEAUX                                                                                                                                       | CNR Virus des Infections Respiratoires - France SUD                                                                                               | Antonin Bal, Gregory Destras, Gwendolynne Burfin, Hadrien Regue, Quentin Semanas, Martine Valette, Bruno Lina, Laurence Josset                                                                                                                                                                                                                                                                                                                                                                  |
| EPI_ISL_1222696, EPI_ISL_1222701                                                                                                       | Northwest Laboratories                                                                                                                            | Seattle Flu Study                                                                                                                                 | Deborah A. Nickerson, Chris D. Frazar, Jover Lee, Benjamin Pelle, Erica Ryke, Matthew Richardson, Amanda Adler, Elisabeth Brandstetter, Peter D. Han, Kairsten Fay, Misja Ilcisin, Kirsten Lacombe, Thomas R. Sibley, Melissa Truong, Caitlin R. Wolf, Romesh Gautom, Geoff Melly, Brian Hiatt, Philip Dykema, Scott Lindquist, Michael Boeckh, Janet A. Englund, Michael Famulare, Barry R. Lutz, Mark J. Rieder, Lea M. Starita, Matthew Thompson, Helen Y. Chu, Jay Shendure, Trevor Bedford |
| EPI_ISL_1222707                                                                                                                        | Evergreen Healthcare                                                                                                                              | Seattle Flu Study                                                                                                                                 | Deborah A. Nickerson, Chris D. Frazar, Jover Lee, Benjamin Pelle, Erica Ryke, Matthew Richardson, Amanda Adler, Elisabeth Brandstetter, Peter D. Han, Kairsten Fay, Misja Ilcisin, Kirsten Lacombe, Thomas R. Sibley, Melissa Truong, Caitlin R. Wolf, Romesh Gautom, Geoff Melly, Brian Hiatt, Philip Dykema, Scott Lindquist, Michael Boeckh, Janet A. Englund, Michael Famulare, Barry R. Lutz, Mark J. Rieder, Lea M. Starita, Matthew Thompson, Helen Y. Chu, Jay Shendure, Trevor Bedford |
| EPI_ISL_1222796, EPI_ISL_1222818, EPI_ISL_1222843, EPI_ISL_1222885                                                                     | Azienda Sanitaria dell'Alto Adige Laboratorio Aziendale di Microbiologia e Virologia                                                              | Istituto di Genomica Applicata                                                                                                                    | Elisabetta Pagani, Irene Bianconi, Elisabetta Giacobazzi, Elisa Masi, Stefanie Wieser, Irena Jurman, Vera Vendramin, Gabriele Magris, Eleonora Paparelli, Davide Scaglione, Michele Morgante                                                                                                                                                                                                                                                                                                    |
| EPI_ISL_1223198                                                                                                                        | Lighthouse Lab in Cambridge                                                                                                                       | Wellcome Sanger Institute for the COVID-19 Genomics UK (COG-UK) Consortium                                                                        | Rob Howes, The Lighthouse Lab in Cambridge and Alex Alderton, Roberto Amato, Jeffrey Barrett, Sonia Goncalves, Ewan Harrison, David K. Jackson, Ian Johnston, Dominic Kwiatkowski, Cordelia Langford, John Sillitoe on behalf of the Wellcome Sanger Institute COVID-19 Surveillance Team                                                                                                                                                                                                       |
| EPI_ISL_1223516                                                                                                                        | Lighthouse Lab in Glasgow                                                                                                                         | Wellcome Sanger Institute for the COVID-19 Genomics UK (COG-UK) Consortium                                                                        | Harper VanSteenhouse, Yumi Kasai, David Gray, Carol Clugston, Anna Dominiczak and Alex Alderton, Roberto Amato, Jeffrey Barrett, Sonia Goncalves, Ewan Harrison, David K. Jackson, Ian Johnston, Dominic Kwiatkowski, Cordelia Langford, John Sillitoe on behalf of the Wellcome Sanger Institute COVID-19 Surveillance Team                                                                                                                                                                    |
| EPI_ISL_1225190                                                                                                                        | Vault Health                                                                                                                                      | Minnesota Department of Health, Public Health Laboratory                                                                                          | Alexandra Lorentz, Jacob Garfin, Matt Plumb, and Xiong Wang                                                                                                                                                                                                                                                                                                                                                                                                                                     |
| EPI_ISL_1225584, EPI_ISL_1225586, EPI_ISL_1225587, EPI_ISL_1225589, EPI_ISL_1225590, EPI_ISL_1225591, EPI_ISL_1225592, EPI_ISL_1225594 | Yale Clinical Virology Lab                                                                                                                        | Grubaugh Lab - Yale School of Public Health                                                                                                       | Joseph Fauver, Mallery Breban, Isabell Ott, Tara Alpert, Mary Petrone, Anderson Brito, Chantal Vogels, Annie Watkins, Chaney Kalinich, Marie L. Landry, Nathan Grubaugh                                                                                                                                                                                                                                                                                                                         |
| EPI_ISL_1225595                                                                                                                        | Tempus                                                                                                                                            | Grubaugh Lab - Yale School of Public Health                                                                                                       | Joseph Fauver, Mallery Breban, Isabell Ott, Tara Alpert, Mary Petrone, Anderson Brito, Chantal Vogels, Annie Watkins, Chaney Kalinich, Matthew J. MacKay, Gaurav Khullar, Jessica Metti, Joel T. Dudley, Megan Nash, Nike Beaubier, Christopher E. Mason, Nathan Grubaugh                                                                                                                                                                                                                       |
| EPI_ISL_1225596, EPI_ISL_1225598                                                                                                       | Yale Clinical Virology Lab                                                                                                                        | Grubaugh Lab - Yale School of Public Health                                                                                                       | Joseph Fauver, Mallery Breban, Isabell Ott, Tara Alpert, Mary Petrone, Anderson Brito, Chantal Vogels, Annie Watkins, Chaney Kalinich, Marie L. Landry, Nathan Grubaugh                                                                                                                                                                                                                                                                                                                         |
| EPI_ISL_1225599                                                                                                                        | Tempus                                                                                                                                            | Grubaugh Lab - Yale School of Public Health                                                                                                       | Joseph Fauver, Mallery Breban, Isabell Ott, Tara Alpert, Mary Petrone, Anderson Brito, Chantal Vogels, Annie Watkins, Chaney Kalinich, Matthew J. MacKay, Gaurav Khullar, Jessica Metti, Joel T. Dudley, Megan Nash, Nike Beaubier, Christopher E. Mason, Nathan Grubaugh                                                                                                                                                                                                                       |
| EPI_ISL_1225601                                                                                                                        | Yale Clinical Virology Lab                                                                                                                        | Grubaugh Lab - Yale School of Public Health                                                                                                       | Joseph Fauver, Mallery Breban, Isabell Ott, Tara Alpert, Mary Petrone, Anderson Brito, Chantal Vogels, Annie Watkins, Chaney Kalinich, Marie L. Landry, Nathan Grubaugh                                                                                                                                                                                                                                                                                                                         |
| EPI_ISL_1225604, EPI_ISL_1225605                                                                                                       | Tempus                                                                                                                                            | Grubaugh Lab - Yale School of Public Health                                                                                                       | Joseph Fauver, Mallery Breban, Isabell Ott, Tara Alpert, Mary Petrone, Anderson Brito, Chantal Vogels, Annie Watkins, Chaney Kalinich, Matthew J. MacKay, Gaurav Khullar, Jessica Metti, Joel T. Dudley, Megan Nash, Nike Beaubier, Christopher E. Mason, Nathan Grubaugh                                                                                                                                                                                                                       |







|                                                                                                                                                                                                                                                                                                                  |                                                                                                                                                |                                                                                                                        |                                                                                                                                                                                                                                                                                                                                                                                                                                                |
|------------------------------------------------------------------------------------------------------------------------------------------------------------------------------------------------------------------------------------------------------------------------------------------------------------------|------------------------------------------------------------------------------------------------------------------------------------------------|------------------------------------------------------------------------------------------------------------------------|------------------------------------------------------------------------------------------------------------------------------------------------------------------------------------------------------------------------------------------------------------------------------------------------------------------------------------------------------------------------------------------------------------------------------------------------|
| EPI_ISL_1228916                                                                                                                                                                                                                                                                                                  | CHU SAINT-ETIENNE                                                                                                                              | CNR Virus des Infections Respiratoires - France SUD                                                                    | Antonin Bal, Gregory Destras, Gwendolyne Burfin, Hadrien Regue, Quentin Semanas, Martine Valette, Bruno Lina, Laurence Josset                                                                                                                                                                                                                                                                                                                  |
| EPI_ISL_1228939                                                                                                                                                                                                                                                                                                  | CHU GRENOBLE                                                                                                                                   | CNR Virus des Infections Respiratoires - France SUD                                                                    | Antonin Bal, Gregory Destras, Gwendolyne Burfin, Hadrien Regue, Quentin Semanas, Martine Valette, Bruno Lina, Laurence Josset                                                                                                                                                                                                                                                                                                                  |
| EPI_ISL_1228963, EPI_ISL_1229002                                                                                                                                                                                                                                                                                 | Cerballiance                                                                                                                                   | CNR Virus des Infections Respiratoires - France SUD                                                                    | Antonin Bal, Gregory Destras, Gwendolyne Burfin, Hadrien Regue, Quentin Semanas, Martine Valette, Bruno Lina, Laurence Josset                                                                                                                                                                                                                                                                                                                  |
| EPI_ISL_1229005                                                                                                                                                                                                                                                                                                  | CHU MONTAUBAN                                                                                                                                  | CNR Virus des Infections Respiratoires - France SUD                                                                    | Antonin Bal, Gregory Destras, Gwendolyne Burfin, Hadrien Regue, Quentin Semanas, Martine Valette, Bruno Lina, Laurence Josset                                                                                                                                                                                                                                                                                                                  |
| EPI_ISL_1229130                                                                                                                                                                                                                                                                                                  | IRCCS San Raffaele                                                                                                                             | INMI Lazzaro Spallanzani IRCCS                                                                                         | B Bartolini, E Giombini, F Messina, M Ruca, O Butera, CEM Gruber, F Ciatti, D Russo, D Limongi, A Di Caro, MR Capobianchi                                                                                                                                                                                                                                                                                                                      |
| EPI_ISL_1229214                                                                                                                                                                                                                                                                                                  | ASL Napoli 1 Centro                                                                                                                            | AMES Centro Poldiagnostico Strumentale S.r.l.                                                                          | *Giovanni Savarese, Raffaella Ruggiero, Eloisa Evangelista, Antonella Di Carlo, Luisa Circelli, Luigi D'Amore, Roberto Sirica, Nadia Petrillo, Monica Ianniello, Maurizio D'Amora, Antonio Fico*                                                                                                                                                                                                                                               |
| EPI_ISL_1229707, EPI_ISL_1229714                                                                                                                                                                                                                                                                                 | ASL Napoli 1 Centro                                                                                                                            | AMES Centro Poldiagnostico Strumentale S.r.l.                                                                          | *Giovanni Savarese, Raffaella Ruggiero, Eloisa Evangelista, Antonella Di Carlo, Luisa Circelli, Luigi D'Amore, Roberto Sirica, Nadia Petrillo, Monica Ianniello, Maurizio D'Amora, Antonio Fico*                                                                                                                                                                                                                                               |
| EPI_ISL_1230050, EPI_ISL_1230075, EPI_ISL_1230103, EPI_ISL_1230173, EPI_ISL_1230205, EPI_ISL_1230231, EPI_ISL_1230293, EPI_ISL_1230340, EPI_ISL_1230346                                                                                                                                                          | Public Health Ontario Laboratory                                                                                                               | Public Health Ontario Laboratory                                                                                       | Vanessa G Allen, Philip Banh, Yao Chen, Richard de Borja, Alireza Eshaghi, Nahuel Fittipaldi, Christine Frantz, Jonathan B Gubbay, Jennifer L Guthrie, Lawrence Heisler, Esha Joshi, Michael Laszloffy, Aimin Li, Michael CY Li, Dean Maxwell, Sandeep Nagra, Samir N Patel, Jared Simpson, Karthikeyan Sivaraman, Ashleigh Sullivan, Yogi Sundaravadanam, Sarah Teatero, Andre Villegas, Matthew Watson, Sandra Zittermann                    |
| EPI_ISL_1231535, EPI_ISL_1231551, EPI_ISL_1231595, EPI_ISL_1231600, EPI_ISL_1231607, EPI_ISL_1231616, EPI_ISL_1231617, EPI_ISL_1231625, EPI_ISL_1231627, EPI_ISL_1231661, EPI_ISL_1231685, EPI_ISL_1231716, EPI_ISL_1231732, EPI_ISL_1231733                                                                     | see above                                                                                                                                      | National Center for Infectious and Parasitic Diseases (NCIPD)                                                          | Alexiev et al                                                                                                                                                                                                                                                                                                                                                                                                                                  |
| EPI_ISL_1232269, EPI_ISL_1232728                                                                                                                                                                                                                                                                                 | Dutch COVID-19 response team                                                                                                                   | National Institute for Public Health and the Environment (RIVM)                                                        | Adam Meijer, Harry Vennema, Dirk Eggink, Jeroen Cremer, Sharon van den Brink, Bas van der Veer, AnneMarie van den Brandt, Florian Zwagemaker, Dennis Schmitz, Chantal Reusken, on behalf of the national COVID-19 response team                                                                                                                                                                                                                |
| EPI_ISL_1233063, EPI_ISL_1233109, EPI_ISL_1233110, EPI_ISL_1233116                                                                                                                                                                                                                                               | Centre for Dengue Research and AICBU, Department of Immunology and Molecular Medicine                                                          | Centre for Dengue Research and AICBU, Department of Immunology and Molecular Medicine                                  | Chandima Jeewandara, Deshni Jayathilaka, Dinuka Ariyaratne, Tibutius Thanesh Pramanayagam, Diyanath Ranasinghe, Laksiri Gomes, Gathsaurie Neelika Malavage                                                                                                                                                                                                                                                                                     |
| EPI_ISL_1233228                                                                                                                                                                                                                                                                                                  | Hopital                                                                                                                                        | National Reference Center for Viruses of Respiratory Infections, Institut Pasteur, Paris                               | Marion Barbet, Sylvie Behillil, Méline Bizard, Angela Brisebarre, Camille Capel, Etienne Simon-Lorière, Vincent Enouf, Maud Vanpeene, Sylvie van der Werf, Djamdjian Laura                                                                                                                                                                                                                                                                     |
| EPI_ISL_1233246                                                                                                                                                                                                                                                                                                  | Labo Analyses Med                                                                                                                              | National Reference Center for Viruses of Respiratory Infections, Institut Pasteur, Paris                               | Marion Barbet, Sylvie Behillil, Méline Bizard, Angela Brisebarre, Camille Capel, Etienne Simon-Lorière, Vincent Enouf, Maud Vanpeene, Sylvie van der Werf                                                                                                                                                                                                                                                                                      |
| EPI_ISL_1233464, EPI_ISL_1233473, EPI_ISL_1233481, EPI_ISL_1233487, EPI_ISL_1233494, EPI_ISL_1233497, EPI_ISL_1233526, EPI_ISL_1233542, EPI_ISL_1233549, EPI_ISL_1233552, EPI_ISL_1233555, EPI_ISL_1233556, EPI_ISL_1233558, EPI_ISL_1233559, EPI_ISL_1233572, EPI_ISL_1233574, EPI_ISL_1233587, EPI_ISL_1233602 | see above                                                                                                                                      | National Center for Infectious and Parasitic Diseases (NCIPD)                                                          | Alexiev et al                                                                                                                                                                                                                                                                                                                                                                                                                                  |
| EPI_ISL_1233825, EPI_ISL_1233835, EPI_ISL_1233837, EPI_ISL_1233844, EPI_ISL_1233853                                                                                                                                                                                                                              | Institute of Molecular and Translational Medicine / Laboratory of Experimental Medicine, Faculty of Medicine and Dentistry, Palacky University | Institute of Molecular and Translational Medicine / Laboratory of Experimental Medicine                                | Rastislav Slavkovský, Hana Jaworek, Vladimíra Koudeláková, Marián Hajdúch                                                                                                                                                                                                                                                                                                                                                                      |
| EPI_ISL_1233899                                                                                                                                                                                                                                                                                                  | Respiratory Viruses Branch, Centers for Disease Control and Prevention                                                                         | Respiratory Viruses Branch, Centers for Disease Control and Prevention                                                 | Cook,P.W., Howard,D.T., Batra,D., Rambo-Martin,B.L., de Feo,E., Antico,J., Tran,C., Tolentino,M., Wickline,S., Gietzen,K., Sickler,B., Liu,J., Allen,E., Febbo,P., Galloway,S., Washington,N.L., White,S., Levan,G., Barrett,K.S., Cirulli,E., Bolze,A., Ascencio,A., Rivera-Garcia,C., Cho,R., Nguyen,J., Wang,S., Ramirez,J., Cassens,T., Sandoval,E., Isaksson,M., Lee,W., Becker,D., Laurent,M., Lu,J., Paden,C.R., Tong,S., MacCannell,D. |
| EPI_ISL_1234384                                                                                                                                                                                                                                                                                                  | Institute of Virology, Biomedical Research Center of the Slovak Academy of Sciences, Bratislava                                                | Faculty of Natural Sciences, Comenius University, Bratislava                                                           | Viktória abanová, Kristína Boršová, Broa Brejová, Viktória Hodorová, Sabina Fumaová Havlíková, Juraj Kopáek, Martina Liková, ubomíra Lukáiková, Martina Neboháová, Monika Sláviková, Tomáš Vína, Jozef Nosek, Boris Klempa                                                                                                                                                                                                                     |
| EPI_ISL_1234393, EPI_ISL_1234395, EPI_ISL_1234433                                                                                                                                                                                                                                                                | Institute of Virology, Biomedical Research Center of the Slovak Academy of Sciences, Bratislava                                                | Faculty of Natural Sciences, Comenius University, Bratislava                                                           | Kristína Boršová, Viktória abanová, Broa Brejová, Viktória Hodorová, Sabina Fumaová Havlíková, Juraj Kopáek, Martina Liková, ubomíra Lukáiková, Martina Neboháová, Monika Sláviková, Tomáš Vína, Boris Klempa, Jozef Nosek                                                                                                                                                                                                                     |
| EPI_ISL_1234470                                                                                                                                                                                                                                                                                                  | Institute of Virology, Biomedical Research Center of the Slovak Academy of Sciences, Bratislava                                                | Faculty of Natural Sciences, Comenius University, Bratislava                                                           | Viktória abanová, Kristína Boršová, Broa Brejová, Viktória Hodorová, Sabina Fumaová Havlíková, Juraj Kopáek, Martina Liková, ubomíra Lukáiková, Martina Neboháová, Monika Sláviková, Tomáš Vína, Jozef Nosek, Boris Klempa                                                                                                                                                                                                                     |
| EPI_ISL_1234503                                                                                                                                                                                                                                                                                                  | Hospital Universitari Vall d'Hebron - Vall d'Hebron Institut de Recerca                                                                        | Hospital Universitari Vall d'Hebron - Vall d'Hebron Institut de Recerca                                                | Cristina Andrés, Maria Piñana, Josep F Abril, Damir Garcia-Cehic, Ariadna Rando, Juliàna Esperalba, María Gema Codina, Carla Castillo, María Carmen Martín, Tomás Pumarola, Josep Quer, Andrés Antón                                                                                                                                                                                                                                           |
| EPI_ISL_1235652, EPI_ISL_1235659                                                                                                                                                                                                                                                                                 | Nigerian Centre for Disease Control (NCDC)                                                                                                     | African Centre of Excellence for Genomics of Infectious Diseases (ACEGID), Redeemer's University                       | Olawoye, I.B., et al                                                                                                                                                                                                                                                                                                                                                                                                                           |
| EPI_ISL_1235701, EPI_ISL_1236383, EPI_ISL_1236628, EPI_ISL_1237130, EPI_ISL_1237184, EPI_ISL_1237190, EPI_ISL_1238494                                                                                                                                                                                            | Houston Methodist Hospital                                                                                                                     | Houston Methodist Hospital                                                                                             | S. Wesley Long, Randall J. Olsen, Paul A. Christensen, Sishir Subedi, Robert Olson, James J. Davis, Matthew Ojeda Saavedra, Prasanti Yerramilli, Layne Pruitt, Kristina Reppond, Madison N. Snyer, Jessica Cambric, Ilya J. Finkelstein, Jimmy Gollinar, and James M. Musser                                                                                                                                                                   |
| EPI_ISL_1238872                                                                                                                                                                                                                                                                                                  | Utah Public Health Laboratory                                                                                                                  | Utah Public Health Laboratory                                                                                          | Erin L. Young, Kelly F. Oakeson, Tara Gallagher                                                                                                                                                                                                                                                                                                                                                                                                |
| EPI_ISL_1238937                                                                                                                                                                                                                                                                                                  | Johns Hopkins Hospital Department of Pathology                                                                                                 | Johns Hopkins Hospital Department of Pathology                                                                         | C. Paul Morris, Chun Huai Luo, Adannaya Amadi, Matthew Schwartz, Nicholas Gallagher, Heba H. Mostafa                                                                                                                                                                                                                                                                                                                                           |
| EPI_ISL_1239046                                                                                                                                                                                                                                                                                                  | Hematology Laboratory, Section of Molecular Diagnostics, University Clinical Centre, Medical University of Gdansk                              | 1. Laboratory of Recombinant Vaccines 2. Department of Biology and Medical Genetics 3. Laboratory of Clinical Genetics | Lukasz Rabalski, Maciej Kosinski, Bartosz Wasag, Adam Sodal, Aneta Szulc, Krzysztof Lewandowski, Ewa Milosz, Marlena Robakowska, Bogusław Szewczyk, Krystyna Bienkowska-Szewczyk                                                                                                                                                                                                                                                               |
| EPI_ISL_1239121                                                                                                                                                                                                                                                                                                  | Laboratório Central de Saúde Pública do Espírito Santo                                                                                         | Coordenação Geral de Laboratórios de Saúde Pública (CGLAB)                                                             | Vagner Fonseca et al,                                                                                                                                                                                                                                                                                                                                                                                                                          |
| EPI_ISL_1239386                                                                                                                                                                                                                                                                                                  | Institute of Virology, Biomedical Research Center of the Slovak Academy of Sciences, Bratislava                                                | Faculty of Natural Sciences, Comenius University, Bratislava                                                           | Viktória abanová, Kristína Boršová, Broa Brejová, Viktória Hodorová, Sabina Fumaová Havlíková, Juraj Kopáek, Martina Liková, ubomíra Lukáiková, Martina Neboháová, Monika Sláviková, Tomáš Vína, Jozef Nosek, Boris Klempa                                                                                                                                                                                                                     |
| EPI_ISL_1239453, EPI_ISL_1239457                                                                                                                                                                                                                                                                                 | Gundersen Molecular Diagnostics Laboratory                                                                                                     | Kabara Cancer Research Institute                                                                                       | Craig S. Richmond, Paraic A. Kenny                                                                                                                                                                                                                                                                                                                                                                                                             |
| EPI_ISL_1239536                                                                                                                                                                                                                                                                                                  | Diagnostyka                                                                                                                                    | 1. National Institute of Public Health - National Institute of Hygiene; 2. Eurofins Genomics Europe Sequencing GmbH    | Wokowicz Tomasz, Zacharczuk Katarzyna, Sadkowska-Todys Magorzata, Gierczyki Rafa, Eurofins Genomics Europe Sequencing Team, ECDC COVID-19 WGS support team                                                                                                                                                                                                                                                                                     |
| EPI_ISL_1239573                                                                                                                                                                                                                                                                                                  | WSSE w Krakowie                                                                                                                                | 1. National Institute of Public Health - National Institute of Hygiene; 2. Eurofins Genomics Europe Sequencing GmbH    | Wokowicz Tomasz, Zacharczuk Katarzyna, Sadkowska-Todys Magorzata, Gierczyki Rafa, Eurofins Genomics Europe Sequencing Team, ECDC COVID-19 WGS support team                                                                                                                                                                                                                                                                                     |
| EPI_ISL_1239581                                                                                                                                                                                                                                                                                                  | Centrum Medycyny Klinicznej i Estetycznej DiMedical Sp. z o.o.                                                                                 | 1. National Institute of Public Health - National Institute of Hygiene; 2. Eurofins Genomics Europe Sequencing GmbH    | Wokowicz Tomasz, Zacharczuk Katarzyna, Sadkowska-Todys Magorzata, Gierczyki Rafa, Eurofins Genomics Europe Sequencing Team, ECDC COVID-19 WGS support team                                                                                                                                                                                                                                                                                     |
| EPI_ISL_1239605                                                                                                                                                                                                                                                                                                  | Laboratorium Badawczo-Rozwojowe Vitagenum                                                                                                      | 1. National Institute of Public Health - National Institute of Hygiene; 2. Eurofins Genomics Europe Sequencing GmbH    | Wokowicz Tomasz, Zacharczuk Katarzyna, Sadkowska-Todys Magorzata, Gierczyki Rafa, Eurofins Genomics Europe Sequencing Team, ECDC COVID-19 WGS support team                                                                                                                                                                                                                                                                                     |
| EPI_ISL_1239606                                                                                                                                                                                                                                                                                                  | Laboratorium Genetyczne Alab Plus Sp. z o.o.                                                                                                   | 1. National Institute of Public Health - National Institute of Hygiene; 2. Eurofins Genomics Europe Sequencing GmbH    | Wokowicz Tomasz, Zacharczuk Katarzyna, Sadkowska-Todys Magorzata, Gierczyki Rafa, Eurofins Genomics Europe Sequencing Team, ECDC COVID-19 WGS support team                                                                                                                                                                                                                                                                                     |
| EPI_ISL_1239610, EPI_ISL_1239611                                                                                                                                                                                                                                                                                 | GenXOne SA                                                                                                                                     | 1. National Institute of Public Health - National Institute of Hygiene; 2. Eurofins Genomics Europe Sequencing GmbH    | Wokowicz Tomasz, Zacharczuk Katarzyna, Sadkowska-Todys Magorzata, Gierczyki Rafa, Eurofins Genomics Europe Sequencing Team, ECDC COVID-19 WGS support team                                                                                                                                                                                                                                                                                     |
| EPI_ISL_1239614                                                                                                                                                                                                                                                                                                  | WSSE Rzeszów LDM                                                                                                                               | 1. National Institute of Public Health - National Institute of                                                         | Wokowicz Tomasz, Zacharczuk Katarzyna, Sadkowska-Todys Magorzata, Gierczyki Rafa, Eurofins Genomics Europe Sequencing Team, ECDC COVID-19                                                                                                                                                                                                                                                                                                      |

|                                                                                                      |                                                                                                                                                                                                                     |                                                                                                                                                                             |                                                                                                                                                                                                                                                                                                                                                         |
|------------------------------------------------------------------------------------------------------|---------------------------------------------------------------------------------------------------------------------------------------------------------------------------------------------------------------------|-----------------------------------------------------------------------------------------------------------------------------------------------------------------------------|---------------------------------------------------------------------------------------------------------------------------------------------------------------------------------------------------------------------------------------------------------------------------------------------------------------------------------------------------------|
| EPI_ISL_1239625                                                                                      | WSSE Katowice                                                                                                                                                                                                       | Hygiene; 2. Eurofins Genomics Europe Sequencing GmbH<br>1. National Institute of Public Health - National Institute of Hygiene; 2. Eurofins Genomics Europe Sequencing GmbH | WGS support team<br>Wokowicz Tomasz, Zacharczuk Katarzyna, Sadkowska-Todys Magorzata, Gierczyki Rafa, Eurofins Genomics Europe Sequencing Team, ECDC COVID-19 WGS support team                                                                                                                                                                          |
| EPI_ISL_1239637, EPI_ISL_1239638, EPI_ISL_1239640, EPI_ISL_1239646, EPI_ISL_1239653, EPI_ISL_1239655 | WSSE Olsztyn                                                                                                                                                                                                        | 1. National Institute of Public Health - National Institute of Hygiene; 2. Eurofins Genomics Europe Sequencing GmbH                                                         | Wokowicz Tomasz, Zacharczuk Katarzyna, Sadkowska-Todys Magorzata, Gierczyki Rafa, Eurofins Genomics Europe Sequencing Team, ECDC COVID-19 WGS support team                                                                                                                                                                                              |
| EPI_ISL_1239659                                                                                      | LABORATORIUM BADA KLINICZNYCH WSSE w OPOLU                                                                                                                                                                          | 1. National Institute of Public Health - National Institute of Hygiene; 2. Eurofins Genomics Europe Sequencing GmbH                                                         | Wokowicz Tomasz, Zacharczuk Katarzyna, Sadkowska-Todys Magorzata, Gierczyki Rafa, Eurofins Genomics Europe Sequencing Team, ECDC COVID-19 WGS support team                                                                                                                                                                                              |
| EPI_ISL_1239669                                                                                      | Lab. Biologii molekularnej USK                                                                                                                                                                                      | 1. National Institute of Public Health - National Institute of Hygiene; 2. Eurofins Genomics Europe Sequencing GmbH                                                         | Wokowicz Tomasz, Zacharczuk Katarzyna, Sadkowska-Todys Magorzata, Gierczyki Rafa, Eurofins Genomics Europe Sequencing Team, ECDC COVID-19 WGS support team                                                                                                                                                                                              |
| EPI_ISL_1239672                                                                                      | BRUSS                                                                                                                                                                                                               | 1. National Institute of Public Health - National Institute of Hygiene; 2. Eurofins Genomics Europe Sequencing GmbH                                                         | Wokowicz Tomasz, Zacharczuk Katarzyna, Sadkowska-Todys Magorzata, Gierczyki Rafa, Eurofins Genomics Europe Sequencing Team, ECDC COVID-19 WGS support team                                                                                                                                                                                              |
| EPI_ISL_1239676                                                                                      | UCK                                                                                                                                                                                                                 | 1. National Institute of Public Health - National Institute of Hygiene; 2. Eurofins Genomics Europe Sequencing GmbH                                                         | Wokowicz Tomasz, Zacharczuk Katarzyna, Sadkowska-Todys Magorzata, Gierczyki Rafa, Eurofins Genomics Europe Sequencing Team, ECDC COVID-19 WGS support team                                                                                                                                                                                              |
| EPI_ISL_1239696                                                                                      | WSSE w Krakowie                                                                                                                                                                                                     | 1. National Institute of Public Health - National Institute of Hygiene; 2. Eurofins Genomics Europe Sequencing GmbH                                                         | Wokowicz Tomasz, Zacharczuk Katarzyna, Sadkowska-Todys Magorzata, Gierczyki Rafa, Eurofins Genomics Europe Sequencing Team, ECDC COVID-19 WGS support team                                                                                                                                                                                              |
| EPI_ISL_1240728, EPI_ISL_1240736, EPI_ISL_1240775, EPI_ISL_1240778, EPI_ISL_1240789, EPI_ISL_1240790 | University Hospitals Translational Laboratory (UHTL), University Hospitals                                                                                                                                          | University Hospitals Translational Laboratory (UHTL), University Hospitals                                                                                                  | Sadri,N., Alouani,D., Song,X.                                                                                                                                                                                                                                                                                                                           |
| EPI_ISL_1240892                                                                                      | Clinical Molecular Microbiology Laboratory, UNC Hospitals                                                                                                                                                           | Jeremy Wang                                                                                                                                                                 | Jeremy Wang, Alexander Rubinsteyn, Colleen Rice, Jason Smedberg, Shawn Hawken, Melissa Miller, Corbin Jones, Robert Hagan                                                                                                                                                                                                                               |
| EPI_ISL_1241866, EPI_ISL_1241939                                                                     | BIOMNIS LYON                                                                                                                                                                                                        | CNR Virus des Infections Respiratoires - France SUD                                                                                                                         | Antonin Bal, Gregory Destras, Gwendolynne Burfin, Hadrien Regue, Quentin Semanas, Martine Valette, Bruno Lina, Laurence Josset                                                                                                                                                                                                                          |
| EPI_ISL_1241955, EPI_ISL_1242001                                                                     | CNR Virus des Infections Respiratoires - France SUD                                                                                                                                                                 | CNR Virus des Infections Respiratoires - France SUD                                                                                                                         | Antonin Bal, Gregory Destras, Gwendolynne Burfin, Hadrien Regue, Quentin Semanas, Martine Valette, Bruno Lina, Laurence Josset                                                                                                                                                                                                                          |
| EPI_ISL_1242013, EPI_ISL_1242015, EPI_ISL_1242019, EPI_ISL_1242020                                   | Nigeria Centre for Disease Control (NCDC)                                                                                                                                                                           | African Centre of Excellence for Genomics of Infectious Diseases (ACEGID), Redeemer's University                                                                            | Oluniji P.E. et al                                                                                                                                                                                                                                                                                                                                      |
| EPI_ISL_1242224                                                                                      | Lighthouse Lab in Cambridge                                                                                                                                                                                         | Wellcome Sanger Institute for the COVID-19 Genomics UK (COG-UK) Consortium                                                                                                  | Rob Howes, The Lighthouse Lab in Cambridge and Alex Alderton, Roberto Amato, Jeffrey Barrett, Sonia Goncalves, Ewan Harrison, David K. Jackson, Ian Johnston, Dominic Kwiatkowski, Cordelia Langford, John Sillitoe on behalf of the Wellcome Sanger Institute COVID-19 Surveillance Team                                                               |
| EPI_ISL_1242394, EPI_ISL_1242491                                                                     | Randox Laboratories                                                                                                                                                                                                 | Wellcome Sanger Institute for the COVID-19 Genomics UK (COG-UK) Consortium                                                                                                  | Randox Laboratories and Alex Alderton, Roberto Amato, Jeffrey Barrett, Sonia Goncalves, Ewan Harrison, David K. Jackson, Ian Johnston, Dominic Kwiatkowski, Cordelia Langford, John Sillitoe on behalf of the Wellcome Sanger Institute COVID-19 Surveillance Team                                                                                      |
| EPI_ISL_1243714                                                                                      | Lighthouse Lab in Glasgow                                                                                                                                                                                           | Wellcome Sanger Institute for the COVID-19 Genomics UK (COG-UK) Consortium                                                                                                  | Harper VanSteenhouse, Yumi Kasai, David Gray, Carol Clugston, Anna Dominiczak and Alex Alderton, Roberto Amato, Jeffrey Barrett, Sonia Goncalves, Ewan Harrison, David K. Jackson, Ian Johnston, Dominic Kwiatkowski, Cordelia Langford, John Sillitoe on behalf of the Wellcome Sanger Institute COVID-19 Surveillance Team                            |
| EPI_ISL_1244232                                                                                      | Lighthouse Lab in Milton Keynes                                                                                                                                                                                     | Wellcome Sanger Institute for the COVID-19 Genomics UK (COG-UK) Consortium                                                                                                  | The Lighthouse Lab in Milton Keynes and Alex Alderton, Roberto Amato, Jeffrey Barrett, Sonia Goncalves, Ewan Harrison, David K. Jackson, Ian Johnston, Dominic Kwiatkowski, Cordelia Langford, John Sillitoe on behalf of the Wellcome Sanger Institute COVID-19 Surveillance Team                                                                      |
| EPI_ISL_1244709                                                                                      | Lighthouse Lab in Glasgow                                                                                                                                                                                           | Wellcome Sanger Institute for the COVID-19 Genomics UK (COG-UK) Consortium                                                                                                  | Harper VanSteenhouse, Yumi Kasai, David Gray, Carol Clugston, Anna Dominiczak and Alex Alderton, Roberto Amato, Jeffrey Barrett, Sonia Goncalves, Ewan Harrison, David K. Jackson, Ian Johnston, Dominic Kwiatkowski, Cordelia Langford, John Sillitoe on behalf of the Wellcome Sanger Institute COVID-19 Surveillance Team                            |
| EPI_ISL_1245006                                                                                      | Lighthouse Lab in Cambridge                                                                                                                                                                                         | Wellcome Sanger Institute for the COVID-19 Genomics UK (COG-UK) Consortium                                                                                                  | Rob Howes, The Lighthouse Lab in Cambridge and Alex Alderton, Roberto Amato, Jeffrey Barrett, Sonia Goncalves, Ewan Harrison, David K. Jackson, Ian Johnston, Dominic Kwiatkowski, Cordelia Langford, John Sillitoe on behalf of the Wellcome Sanger Institute COVID-19 Surveillance Team                                                               |
| EPI_ISL_1245698, EPI_ISL_1245745                                                                     | Lighthouse Lab in Alderley Park                                                                                                                                                                                     | Wellcome Sanger Institute for the COVID-19 Genomics UK (COG-UK) Consortium                                                                                                  | Jacquelyn Wynn, Mairead Hyland, The Lighthouse Lab in Alderley Park and Alex Alderton, Roberto Amato, Jeffrey Barrett, Sonia Goncalves, Ewan Harrison, David K. Jackson, Ian Johnston, Dominic Kwiatkowski, Cordelia Langford, John Sillitoe on behalf of the Wellcome Sanger Institute COVID-19 Surveillance Team                                      |
| EPI_ISL_1246159                                                                                      | Lighthouse Lab in Glasgow                                                                                                                                                                                           | Wellcome Sanger Institute for the COVID-19 Genomics UK (COG-UK) Consortium                                                                                                  | Harper VanSteenhouse, Yumi Kasai, David Gray, Carol Clugston, Anna Dominiczak and Alex Alderton, Roberto Amato, Jeffrey Barrett, Sonia Goncalves, Ewan Harrison, David K. Jackson, Ian Johnston, Dominic Kwiatkowski, Cordelia Langford, John Sillitoe on behalf of the Wellcome Sanger Institute COVID-19 Surveillance Team                            |
| EPI_ISL_1246224                                                                                      | Lighthouse Lab in Cambridge                                                                                                                                                                                         | Wellcome Sanger Institute for the COVID-19 Genomics UK (COG-UK) Consortium                                                                                                  | Rob Howes, The Lighthouse Lab in Cambridge and Alex Alderton, Roberto Amato, Jeffrey Barrett, Sonia Goncalves, Ewan Harrison, David K. Jackson, Ian Johnston, Dominic Kwiatkowski, Cordelia Langford, John Sillitoe on behalf of the Wellcome Sanger Institute COVID-19 Surveillance Team                                                               |
| EPI_ISL_1248250, EPI_ISL_1248256, EPI_ISL_1248263, EPI_ISL_1248324                                   | Wojewodzka Stacja Sanitarno-Epidemiologiczna w Olsztynie, Laboratorium Badan Epidemiologiczno-Klinicznych                                                                                                           | Wojewodzka Stacja Sanitarno-Epidemiologiczna w Olsztynie, Laboratorium Badan Epidemiologiczno-Klinicznych                                                                   | Sylvia Krzetowska, Monika Czerminska, Ewa Liszewska, Tomasz Jakubczak, Marta Lukian, Patryk Bielecki, Aleksandra Kobiato, Emilia Tarabasz, Paulina Rozycka, Barbara Dolinska                                                                                                                                                                            |
| EPI_ISL_1248850                                                                                      | Northumbria University / South Tees Hospitals NHS Foundation Trust / North Cumbria Integrated Care NHS Foundation Trust / North Tees and Hartlepool NHS Foundation Trust / Newcastle Hospitals NHS Foundation Trust | COVID-19 Genomics UK (COG-UK) Consortium                                                                                                                                    | Darren L Smith, Andrew Nelson, Matthew Bashton, Greg R Young, Joshua Loh, John Allan, Mohammad A Tariq, Giles S Holt, Gary Black, Wen C Yew, Lynn Dover, Paul Baker, Steve Liggett, Sarah Essex, Jane Greenaway, Debra Padgett, Clive Graham, Garren Scott, Edward Barton, Emma Swindells, Brendan Payne, Jennifer Collins, Yusri Taha, Gary Eltringham |
| EPI_ISL_1249986                                                                                      | Microbiological Diagnostic Unit - Public Health Laboratory (MDU-PHL)                                                                                                                                                | MDU-PHL                                                                                                                                                                     | Seemann T., Sait, M.L., Sherry, N.L.                                                                                                                                                                                                                                                                                                                    |
| EPI_ISL_1250154                                                                                      | Department of Pathology, University of Cambridge                                                                                                                                                                    | COVID-19 Genomics UK (COG-UK) Consortium                                                                                                                                    | Aminu S. Jahun, Yasmin Chaudhry, Iliana Georgana, Myra Hosmillo, Rhys Izuagbe, William L. Hamilton, Martin D. Curran, Surendra Parmar, Ian Goodfellow                                                                                                                                                                                                   |
| EPI_ISL_1250539, EPI_ISL_1250562, EPI_ISL_1250573, EPI_ISL_1250582, EPI_ISL_1250593                  | Michigan Department of Health and Human Services, Bureau of Laboratories                                                                                                                                            | Michigan Department of Health and Human Services, Bureau of Laboratories                                                                                                    | Blankenship HM, Riner D, Soehlen MK                                                                                                                                                                                                                                                                                                                     |
| EPI_ISL_1250684                                                                                      | Institute of Microbiology and Immunology, Faculty of Medicine, University of Ljubljana                                                                                                                              | Institute of Microbiology and Immunology, Faculty of Medicine, University of Ljubljana                                                                                      | Alen Sulji, Samo Zakotnik, Tomaž Mark Zorec, Matic Brvar, Doroteja Vljaj, Andrej Celar, Dominika Šturm, Patricija Pozvek, Špela Pleh, Miša Korva, Mario Poljak, Tatjana Avši - Županc                                                                                                                                                                   |
| EPI_ISL_1250766                                                                                      | Hospital Universitari Vall d'Hebron - Vall d'Hebron Institut de Recerca                                                                                                                                             | Hospital Universitari Vall d'Hebron - Vall d'Hebron Institut de Recerca                                                                                                     | Cristina Andrés, Maria Piñana, Josep F Abril, Damir Garcia-Cehic, Ariadna Rando, Juliana Esperalba, Maria Gema Codina, Carla Castillo, Maria Carmen Martin, Tomás Pumarola, Josep Quer, Andrés Antón                                                                                                                                                    |
| EPI_ISL_1250866, EPI_ISL_1250869, EPI_ISL_1250925, EPI_ISL_1250927                                   | genXone SA, Molecular Diagnostics Laboratory / NZOZ                                                                                                                                                                 | genXone SA, Research & Development Laboratory                                                                                                                               | Maciej Sykulski, Grzegorz Nowicki, Jakub Grabowski, Natalia Drweska-Matelska, Anna Brylak-Blaszkow, Aleksandra Gidlewicz, Karol Szeszko, Lukasz Krych, Michal Kaszuba                                                                                                                                                                                   |
| EPI_ISL_1250951                                                                                      | siesp dipartimento di prevenzione                                                                                                                                                                                   | Istituto Zooprofilattico Sperimentale dell'Abruzzo e Molise "G. Caporale"                                                                                                   | Lorusso A, Marcacci M, Di Domenico M, Ancora M, Curini V, Mangone I, Rinaldi A, Scialabba S, Di Pasquale A, Cammà C, Puglia I, Calistri P, Savini G                                                                                                                                                                                                     |
| EPI_ISL_1250997                                                                                      | Siesp dipartimento di prevenzione                                                                                                                                                                                   | Istituto Zooprofilattico Sperimentale dell'Abruzzo e Molise "G. Caporale"                                                                                                   | Lorusso A, Marcacci M, Di Domenico M, Ancora M, Curini V, Mangone I, Rinaldi A, Scialabba S, Di Pasquale A, Cammà C, Puglia I, Calistri P, Savini G                                                                                                                                                                                                     |
| EPI_ISL_1251007                                                                                      | OSPEDALE SAN SALVATORE                                                                                                                                                                                              | Istituto Zooprofilattico Sperimentale dell'Abruzzo e Molise "G. Caporale"                                                                                                   | Lorusso A, Marcacci M, Di Domenico M, Ancora M, Curini V, Mangone I, Rinaldi A, Scialabba S, Di Pasquale A, Cammà C, Puglia I, Calistri P, Savini G                                                                                                                                                                                                     |

|                                                                                                                                                                                                                                                                                                                                                                                                                                                                                                                                                                                                                                                                                                        |                                                                                                             |                                                                                                           |                                                                                                                                                                                                                                                                                                                                                                                                                                                                                                                    |                                                                                                                                                  |
|--------------------------------------------------------------------------------------------------------------------------------------------------------------------------------------------------------------------------------------------------------------------------------------------------------------------------------------------------------------------------------------------------------------------------------------------------------------------------------------------------------------------------------------------------------------------------------------------------------------------------------------------------------------------------------------------------------|-------------------------------------------------------------------------------------------------------------|-----------------------------------------------------------------------------------------------------------|--------------------------------------------------------------------------------------------------------------------------------------------------------------------------------------------------------------------------------------------------------------------------------------------------------------------------------------------------------------------------------------------------------------------------------------------------------------------------------------------------------------------|--------------------------------------------------------------------------------------------------------------------------------------------------|
| EPI_ISL_1251009                                                                                                                                                                                                                                                                                                                                                                                                                                                                                                                                                                                                                                                                                        | Siesp dipartimento di prevenzione                                                                           | Istituto Zooprofilattico Sperimentale dell'Abruzzo e Molise "G. Caporale"                                 | Lorusso A, Marcacci M, Di Domenico M, Ancora M, Curini V, Mangone I, Rinaldi A, Scialabba S, Di Pasquale A, Cammà C, Puglia I, Calistri P, Savini G                                                                                                                                                                                                                                                                                                                                                                |                                                                                                                                                  |
| EPI_ISL_1251022                                                                                                                                                                                                                                                                                                                                                                                                                                                                                                                                                                                                                                                                                        | Usca castel di sangro                                                                                       | Istituto Zooprofilattico Sperimentale dell'Abruzzo e Molise "G. Caporale"                                 | Lorusso A, Marcacci M, Di Domenico M, Ancora M, Curini V, Mangone I, Rinaldi A, Scialabba S, Di Pasquale A, Cammà C, Puglia I, Calistri P, Savini G                                                                                                                                                                                                                                                                                                                                                                |                                                                                                                                                  |
| EPI_ISL_1251090                                                                                                                                                                                                                                                                                                                                                                                                                                                                                                                                                                                                                                                                                        | Siesp dipartimento di prevenzione                                                                           | Istituto Zooprofilattico Sperimentale dell'Abruzzo e Molise "G. Caporale"                                 | Lorusso A, Marcacci M, Di Domenico M, Ancora M, Curini V, Mangone I, Rinaldi A, Scialabba S, Di Pasquale A, Cammà C, Puglia I, Calistri P, Savini G                                                                                                                                                                                                                                                                                                                                                                |                                                                                                                                                  |
| EPI_ISL_1251094                                                                                                                                                                                                                                                                                                                                                                                                                                                                                                                                                                                                                                                                                        | SIESP CHIETI - LANCIANO                                                                                     | Istituto Zooprofilattico Sperimentale dell'Abruzzo e Molise "G. Caporale"                                 | Lorusso A, Marcacci M, Di Domenico M, Ancora M, Curini V, Mangone I, Rinaldi A, Scialabba S, Di Pasquale A, Cammà C, Puglia I, Calistri P, Savini G                                                                                                                                                                                                                                                                                                                                                                |                                                                                                                                                  |
| EPI_ISL_1251100                                                                                                                                                                                                                                                                                                                                                                                                                                                                                                                                                                                                                                                                                        | Siesp dipartimento di prevenzione                                                                           | Istituto Zooprofilattico Sperimentale dell'Abruzzo e Molise "G. Caporale"                                 | Lorusso A, Marcacci M, Di Domenico M, Ancora M, Curini V, Mangone I, Rinaldi A, Scialabba S, Di Pasquale A, Cammà C, Puglia I, Calistri P, Savini G                                                                                                                                                                                                                                                                                                                                                                |                                                                                                                                                  |
| EPI_ISL_1251144, EPI_ISL_1251155                                                                                                                                                                                                                                                                                                                                                                                                                                                                                                                                                                                                                                                                       | Microbiology Department, Laboratori Clinic Metropolitana Nord. Hospital Universitari Germans Trias i Pujol. | Can Ruti SARS-CoV-2 Sequencing Hub (HUGITP/IrsiCaixa/GTP)                                                 | Marc Noguera-Julian, Pilar Armengol, Ignacio Blanco, Antoni E Bordoy, Francesc Catala-Moll, Pere-Joan Cardona, Maria Casadellà, Cristina Casañ, Gemma Clara, Bonaventura Clotet, Cristina Esteban, Montserrat Giménez, Mercedes Guerrero, Anna Not, Roger Paredes, Mariona Parera, Verónica Saludes, Alba Sánchez, and Elisa Martró on behalf of the Can Ruti SARS-CoV-2 Sequencing Hub.                                                                                                                           |                                                                                                                                                  |
| EPI_ISL_1251277                                                                                                                                                                                                                                                                                                                                                                                                                                                                                                                                                                                                                                                                                        | "Stefan S. Nicolau" Institute of Virology                                                                   | "Stefan S. Nicolau" Institute of Virology                                                                 | Anca Botezatu, Iulia Virginia Iancu, Coralia Bleotu, Mihaela Economescu, Laura Necula, Denisa Dragu, Lilia Matei, Ioana Pitica, Marinela Bostan, Mirela Mihaila, Laura Grecu, Camelia Sultana, Simona Ruta, Ana Iulia Neagu, Adriana Plesa, Saviana Nedeianu, Alina Nastasie, Cristina Mambet, Gabriela Anton, Carmen Cristina Diaconu                                                                                                                                                                             |                                                                                                                                                  |
| EPI_ISL_1252014                                                                                                                                                                                                                                                                                                                                                                                                                                                                                                                                                                                                                                                                                        | Medical Microbiology Unit, Department for Laboratory Medicine, Drammen Hospital, Vestre Viken Health Trust, | Norwegian Institute of Public Health, Department of Virology                                              | Kathrine Stene-Johansen, Kamilla Heddeland Insteffjord, Hilde Elshaug, Garcia Llorente Ignacio, Jon Bråte, Engebretsen Serina Beate, Pedersen Benedikte Nevjen, Debeck Nadia, Atiya R Ali, Marie Paulsen Madsen, Rasmus Riis Kopperud, Hilde Vollan, Karoline Bragstad, Olav Hugnnes                                                                                                                                                                                                                               |                                                                                                                                                  |
| EPI_ISL_1252050                                                                                                                                                                                                                                                                                                                                                                                                                                                                                                                                                                                                                                                                                        | Fulgent Genetics                                                                                            | Fulgent Genetics                                                                                          | Harry Gao, Mickey Li, John Gao, Joseph Fierro, Benafsh Sapra, Becky Tsai, Yan Meng, Doreen Ng, James Xie                                                                                                                                                                                                                                                                                                                                                                                                           |                                                                                                                                                  |
| EPI_ISL_1252890, EPI_ISL_1253585                                                                                                                                                                                                                                                                                                                                                                                                                                                                                                                                                                                                                                                                       | University of Wisconsin-Madison AIDS Vaccine Research Laboratories                                          | University of Wisconsin-Madison AIDS Vaccine Research Laboratories                                        | Gage Moreno, Katarina Braun, et al. AIDS Vaccine Research Laboratories                                                                                                                                                                                                                                                                                                                                                                                                                                             |                                                                                                                                                  |
| EPI_ISL_1254266, EPI_ISL_1254282                                                                                                                                                                                                                                                                                                                                                                                                                                                                                                                                                                                                                                                                       | NJDOH, Public Health and Environmental Laboratories                                                         | NJ_PHEL                                                                                                   | Lindsey Bodnar, Shiv K. Verma, Dana Woell, Byeong Jeong                                                                                                                                                                                                                                                                                                                                                                                                                                                            |                                                                                                                                                  |
| EPI_ISL_1254573                                                                                                                                                                                                                                                                                                                                                                                                                                                                                                                                                                                                                                                                                        | University Hospital of Northern Norway, Department for Microbiology and Infectious Disease Control          | Norwegian Institute of Public Health, Department of Virology                                              | Kathrine Stene-Johansen, Kamilla Heddeland Insteffjord, Hilde Elshaug, Garcia Llorente Ignacio, Jon Bråte, Engebretsen Serina Beate, Pedersen Benedikte Nevjen, Debeck Nadia, Atiya R Ali, Marie Paulsen Madsen, Rasmus Riis Kopperud, Hilde Vollan, Karoline Bragstad, Olav Hugnnes                                                                                                                                                                                                                               |                                                                                                                                                  |
| EPI_ISL_1254648                                                                                                                                                                                                                                                                                                                                                                                                                                                                                                                                                                                                                                                                                        | Ospedale di Venere                                                                                          | Istituto Zooprofilattico Sperimentale della Puglia e della Basilicata                                     | Parisi A., Bianco A., Capozzi L., Del Sambro L., Simone D., Iacobellis M., Ridolfi D., Giannico A.                                                                                                                                                                                                                                                                                                                                                                                                                 |                                                                                                                                                  |
| EPI_ISL_1254664                                                                                                                                                                                                                                                                                                                                                                                                                                                                                                                                                                                                                                                                                        | Presidio di Brindisi Di Summa - Perrino                                                                     | Istituto Zooprofilattico Sperimentale della Puglia e della Basilicata                                     | Parisi A., Bianco A., Capozzi L., Del Sambro L., Simone D., Difato L., Ridolfi D., Giannico A.                                                                                                                                                                                                                                                                                                                                                                                                                     |                                                                                                                                                  |
| EPI_ISL_1254696                                                                                                                                                                                                                                                                                                                                                                                                                                                                                                                                                                                                                                                                                        | Ospedale Santissima Annunziata                                                                              | Istituto Zooprofilattico Sperimentale della Puglia e della Basilicata                                     | Parisi A., Bianco A., Capozzi L., Del Sambro L., Simone D., Tampaio M., Difato L., Ridolfi D., Giannico A.                                                                                                                                                                                                                                                                                                                                                                                                         |                                                                                                                                                  |
| EPI_ISL_1254726, EPI_ISL_1254790, EPI_ISL_1254887                                                                                                                                                                                                                                                                                                                                                                                                                                                                                                                                                                                                                                                      | Istituto Zooprofilattico Sperimentale del Mezzogiorno                                                       | Telethon Institute of Genetics and Medicine (TIGEM)                                                       | Antonio Grimaldi Patrizia Annunziata Francesco Panariello Biancamaria Pierri Claudia Tiberio Valentina Bouche Chiara Colantuono Maria Concetta Cuomo Denise Di Concilio Lucio Di Filippo Anna Manfredi Marcello Salvi Antonio Limone Luigi Atripaldi Pellegrino Cerino Andrea Ballabio Davide Cacchiarelli                                                                                                                                                                                                         |                                                                                                                                                  |
| EPI_ISL_1255121, EPI_ISL_1255126, EPI_ISL_1255127, EPI_ISL_1255134, EPI_ISL_1255135, EPI_ISL_1255139, EPI_ISL_1255140, EPI_ISL_1255202, EPI_ISL_1255204, EPI_ISL_1255205, EPI_ISL_1255214, EPI_ISL_1255217, EPI_ISL_1255219, EPI_ISL_1255267, EPI_ISL_1255277                                                                                                                                                                                                                                                                                                                                                                                                                                          | see above                                                                                                   | West African Centre for Cell Biology of Infectious Pathogens (WACCBIP), University of Ghana, Accra, Ghana | Collins M. Morang'a, Joyce M. Ngoi, Evelyn B. Quansah, Samirah Saïid, Dominic S.Y. Amuzu, Vincent Appiah, Philip M. Soglo, Vanessa Magnussen, Aisha Abdul-Mohammed, Kesego Tapela, Nelson Kibinge, Abdoulaye B Diallo, Frederick Kumi-Ansah, Theophilus Odoom, Oliver D Boakye5, Emmanuel A Amoako4, Abdul-Karim Abass, Samuel Kaba Akoryea, Frederick Tei-Maya, Lucas N. Amenga-Etego, Dam Kenneth Mibut, Yaw Bediako, Benjamin Demah Nuerety, Gordon A Awandare, Peter K Quashie, Gordon A Awandare, Yaw Bediako |                                                                                                                                                  |
| EPI_ISL_1255624                                                                                                                                                                                                                                                                                                                                                                                                                                                                                                                                                                                                                                                                                        | Lighthouse Lab in Alderley Park                                                                             | Wellcome Sanger Institute for the COVID-19 Genomics UK (COG-UK) Consortium                                | Jacquelyn Wynn, Mairead Hyland, The Lighthouse Lab in Alderley Park and Alex Alderton, Roberto Amato, Jeffrey Barrett, Sonia Goncalves, Ewan Harrison, David K. Jackson, Ian Johnston, Dominic Kwiatkowski, Cordelia Langford, John Sillitoe on behalf of the Wellcome Sanger Institute COVID-19 Surveillance Team                                                                                                                                                                                                 |                                                                                                                                                  |
| EPI_ISL_1255654, EPI_ISL_1257251, EPI_ISL_1257322                                                                                                                                                                                                                                                                                                                                                                                                                                                                                                                                                                                                                                                      | Lighthouse Lab in Glasgow                                                                                   | Wellcome Sanger Institute for the COVID-19 Genomics UK (COG-UK) Consortium                                | Harper VanSteenhouse, Yumi Kasai, David Gray, Carol Clugston, Anna Dominiczak and Alex Alderton, Roberto Amato, Jeffrey Barrett, Sonia Goncalves, Ewan Harrison, David K. Jackson, Ian Johnston, Dominic Kwiatkowski, Cordelia Langford, John Sillitoe on behalf of the Wellcome Sanger Institute COVID-19 Surveillance Team                                                                                                                                                                                       |                                                                                                                                                  |
| EPI_ISL_1258425                                                                                                                                                                                                                                                                                                                                                                                                                                                                                                                                                                                                                                                                                        | Elias Emergency University Hospital, Bucharest                                                              | National Institute of Infectious Diseases-Prof. Dr. Matei Bals Molecular Diagnostics Laboratory           | Corina Casanguiu, Leontina Banica, Marius Surleac, Ovidiu Vlaicu, Ionelia Nicolae, Simona Paraschiv, Dan Otelea                                                                                                                                                                                                                                                                                                                                                                                                    |                                                                                                                                                  |
| EPI_ISL_1258442, EPI_ISL_1258454                                                                                                                                                                                                                                                                                                                                                                                                                                                                                                                                                                                                                                                                       | National Institute of Infectious Diseases-Prof. Dr. Matei Bals Molecular Diagnostics Laboratory             | National Institute of Infectious Diseases-Prof. Dr. Matei Bals Molecular Diagnostics Laboratory           | Corina Casanguiu, Leontina Banica, Marius Surleac, Ovidiu Vlaicu, Ionelia Nicolae, Simona Paraschiv, Dan Otelea                                                                                                                                                                                                                                                                                                                                                                                                    |                                                                                                                                                  |
| EPI_ISL_1258462                                                                                                                                                                                                                                                                                                                                                                                                                                                                                                                                                                                                                                                                                        | Gorj County Directorate of Public Health                                                                    | National Institute of Infectious Diseases-Prof. Dr. Matei Bals Molecular Diagnostics Laboratory           | Corina Casanguiu, Leontina Banica, Marius Surleac, Ovidiu Vlaicu, Ionelia Nicolae, Simona Paraschiv, Dan Otelea                                                                                                                                                                                                                                                                                                                                                                                                    |                                                                                                                                                  |
| EPI_ISL_1258473, EPI_ISL_1258479, EPI_ISL_1258488, EPI_ISL_1258493, EPI_ISL_1258495, EPI_ISL_1258511, EPI_ISL_1258512, EPI_ISL_1258542, EPI_ISL_1258561, EPI_ISL_1258562, EPI_ISL_1258568, EPI_ISL_1258569, EPI_ISL_1258573, EPI_ISL_1258575, EPI_ISL_1258580, EPI_ISL_1258581, EPI_ISL_1258583, EPI_ISL_1258584, EPI_ISL_1258586, EPI_ISL_1258592, EPI_ISL_1258593, EPI_ISL_1258594, EPI_ISL_1258596, EPI_ISL_1258602, EPI_ISL_1258605, EPI_ISL_1258606, EPI_ISL_1258612, EPI_ISL_1258613, EPI_ISL_1258616, EPI_ISL_1258622, EPI_ISL_1258624, EPI_ISL_1258630, EPI_ISL_1258631, EPI_ISL_1258632, EPI_ISL_1258633, EPI_ISL_1258649, EPI_ISL_1258654, EPI_ISL_1258664, EPI_ISL_1258674, EPI_ISL_1258688 | see above                                                                                                   | Pandemic Response Lab - NYC                                                                               | Pandemic Response Lab, R&D                                                                                                                                                                                                                                                                                                                                                                                                                                                                                         | Henry Lee, Michael Hammerling, Melissa Hopkins, Cybill del Castillo, Shinyoung Clair Kang, William Ward, Pradeep Bugga, Haiping Hao, Jon Laurent |
| EPI_ISL_1259407                                                                                                                                                                                                                                                                                                                                                                                                                                                                                                                                                                                                                                                                                        | INMI Lazzaro Spallanzani IRCCS                                                                              | INMI Lazzaro Spallanzani IRCCS                                                                            | M Rueca, O Butera, CEM Gruber, B Bartolini, F Santini, E Giombini, G Bonfiglio, F Messina, MR Capobianchi, A Di Caro                                                                                                                                                                                                                                                                                                                                                                                               |                                                                                                                                                  |
| EPI_ISL_1259650                                                                                                                                                                                                                                                                                                                                                                                                                                                                                                                                                                                                                                                                                        | Viollier AG                                                                                                 | Department of Biosystems Science and Engineering, ETH Zürich                                              | Christian Beisel, Sarah Nadeau, Chaoran Chen, Ivan Topolsky, Philipp Jablonski, Lara Fuhrmann, David Dreifuss, Katharina Jahn, Rebecca Denes, Mirjam Feldkamp, Ina Nissen, Natascha Santacroce, Elodie Burcklen, Christiane Beckmann, Maurice Redondo, Olivier Kobel, Christoph Noppen, Sophie Seidel, Noemie Santamaria de Souza, Niko Beerenwinkel, Tanja Stadler                                                                                                                                                |                                                                                                                                                  |
| EPI_ISL_1259679                                                                                                                                                                                                                                                                                                                                                                                                                                                                                                                                                                                                                                                                                        | Viollier AG                                                                                                 | Department of Biosystems Science and Engineering, ETH Zürich                                              | Chaoran Chen, Sarah Nadeau, Catharine Aquino, Ivan Topolsky, Philipp Jablonski, Lara Fuhrmann, David Dreifuss, Katharina Jahn, Andrea Cabral de Gouvea, Maria Domenica Moccia, Simon Grüter, Timothy Sykes, Lennart Opitz, Griffin Whyke, Laura Neff, Doris Popovic, Andrea Patignani, Jay Tracy, Ralph Schlapbach, Christiane Beckmann, Maurice Redondo, Olivier Kobel, Christoph Noppen, Sophie Seidel, Noemie Santamaria de Souza, Niko Beerenwinkel, Tanja Stadler                                             |                                                                                                                                                  |
| EPI_ISL_1259685                                                                                                                                                                                                                                                                                                                                                                                                                                                                                                                                                                                                                                                                                        | Viollier AG                                                                                                 | Department of Biosystems Science and Engineering, ETH Zürich                                              | Christian Beisel, Sarah Nadeau, Chaoran Chen, Ivan Topolsky, Philipp Jablonski, Lara Fuhrmann, David Dreifuss, Katharina Jahn, Rebecca Denes, Mirjam Feldkamp, Ina Nissen, Natascha Santacroce, Elodie Burcklen, Christiane Beckmann, Maurice Redondo, Olivier Kobel, Christoph Noppen, Sophie Seidel, Noemie Santamaria de Souza, Niko Beerenwinkel, Tanja Stadler                                                                                                                                                |                                                                                                                                                  |
| EPI_ISL_1260631                                                                                                                                                                                                                                                                                                                                                                                                                                                                                                                                                                                                                                                                                        | Houston Health Dept.                                                                                        | Houston Health Dept.                                                                                      | Ryker Penn, Pamela Brown, Adolpho Lara                                                                                                                                                                                                                                                                                                                                                                                                                                                                             |                                                                                                                                                  |
| EPI_ISL_1260846, EPI_ISL_1260848, EPI_ISL_1260853                                                                                                                                                                                                                                                                                                                                                                                                                                                                                                                                                                                                                                                      | Center of Advanced Studies and Technology, Molecular Genetics Laboratory                                    | Center of Advanced Studies and Technology, Molecular Genetics Laboratory                                  | Ferrante Rossella, Mandatori Domitilla, De Fabritiis Simone, Damiani Verena, Anaclerio Federico                                                                                                                                                                                                                                                                                                                                                                                                                    |                                                                                                                                                  |
| EPI_ISL_1260856                                                                                                                                                                                                                                                                                                                                                                                                                                                                                                                                                                                                                                                                                        | Instituto Nacional de Saude (INSA)                                                                          | Instituto Nacional de Saude (INSA)                                                                        | Borges et al                                                                                                                                                                                                                                                                                                                                                                                                                                                                                                       |                                                                                                                                                  |
| EPI_ISL_1260901                                                                                                                                                                                                                                                                                                                                                                                                                                                                                                                                                                                                                                                                                        | Microbiologia e Virologia                                                                                   | Istituto Zooprofilattico Sperimentale delle Venezie                                                       | Adelaide Milani, Alessia Schivo, Annalisa Salviato, Erika Giorgia Quaranta, Luca Tassoni, Ambra Pastori, Edoardo Giussani, Alice Fusaro, Isabella Monne, Calogero Terregino, Antonia Ricci                                                                                                                                                                                                                                                                                                                         |                                                                                                                                                  |
| EPI_ISL_1260937                                                                                                                                                                                                                                                                                                                                                                                                                                                                                                                                                                                                                                                                                        | ULSS 03 Venezia                                                                                             | Istituto Zooprofilattico Sperimentale delle Venezie                                                       | Adelaide Milani, Alessia Schivo, Annalisa Salviato, Erika Giorgia Quaranta, Luca Tassoni, Ambra Pastori, Edoardo Giussani, Alice Fusaro, Isabella Monne,                                                                                                                                                                                                                                                                                                                                                           |                                                                                                                                                  |

|                                                                                                                                                                                                            |                                                                                                                                                                                                                                                                                                                                                                                                                                                                                                                                                                                                                                                                                                                                                                                                                                                                                                                                                                                                  |                                                                                                                                                                                                                   |                                                                         | Calogero Terregino, Antonia Ricci                                                                                                                                                                                                                                                                                            |
|------------------------------------------------------------------------------------------------------------------------------------------------------------------------------------------------------------|--------------------------------------------------------------------------------------------------------------------------------------------------------------------------------------------------------------------------------------------------------------------------------------------------------------------------------------------------------------------------------------------------------------------------------------------------------------------------------------------------------------------------------------------------------------------------------------------------------------------------------------------------------------------------------------------------------------------------------------------------------------------------------------------------------------------------------------------------------------------------------------------------------------------------------------------------------------------------------------------------|-------------------------------------------------------------------------------------------------------------------------------------------------------------------------------------------------------------------|-------------------------------------------------------------------------|------------------------------------------------------------------------------------------------------------------------------------------------------------------------------------------------------------------------------------------------------------------------------------------------------------------------------|
| EPI_ISL_1261135                                                                                                                                                                                            | National Institute of Infectious Diseases-Prof. Dr. Matei Bals Molecular Diagnostics Laboratory                                                                                                                                                                                                                                                                                                                                                                                                                                                                                                                                                                                                                                                                                                                                                                                                                                                                                                  | National Institute of Infectious Diseases-Prof. Dr. Matei Bals Molecular Diagnostics Laboratory                                                                                                                   |                                                                         | Corina Casangiu, Leontina Banica, Marius Surleac, Ovidiu Vlaicu, Ionelia Nicolae, Simona Paraschiv, Dan Otelea                                                                                                                                                                                                               |
| EPI_ISL_1261168, EPI_ISL_1261170, EPI_ISL_1261177, EPI_ISL_1261225, EPI_ISL_1261240, EPI_ISL_1261242, EPI_ISL_1261255, EPI_ISL_1261284, EPI_ISL_1261286, EPI_ISL_1261288, EPI_ISL_1261289, EPI_ISL_1261292 | see above                                                                                                                                                                                                                                                                                                                                                                                                                                                                                                                                                                                                                                                                                                                                                                                                                                                                                                                                                                                        | National Institute of Public Health                                                                                                                                                                               | National Reference Laboratory for Influenza and Respiratory Viruses CZE | Helena Jirincova, Jaromira Vecerova, Timotej Suri, Dusan Trnka, Alexander Nagy                                                                                                                                                                                                                                               |
| EPI_ISL_1261299                                                                                                                                                                                            | GHC Genetics s.r.o.                                                                                                                                                                                                                                                                                                                                                                                                                                                                                                                                                                                                                                                                                                                                                                                                                                                                                                                                                                              | National Reference Laboratory for Influenza and Respiratory Viruses CZE                                                                                                                                           |                                                                         | Helena Jirincova, Jaromira Vecerova, Timotej Suri, Dusan Trnka, Alexander Nagy                                                                                                                                                                                                                                               |
| EPI_ISL_1261323, EPI_ISL_1261336, EPI_ISL_1261337, EPI_ISL_1261359, EPI_ISL_1261361                                                                                                                        | National Institute of Public Health                                                                                                                                                                                                                                                                                                                                                                                                                                                                                                                                                                                                                                                                                                                                                                                                                                                                                                                                                              | National Reference Laboratory for Influenza and Respiratory Viruses CZE                                                                                                                                           |                                                                         | Helena Jirincova, Jaromira Vecerova, Timotej Suri, Dusan Trnka, Alexander Nagy                                                                                                                                                                                                                                               |
| EPI_ISL_1261476                                                                                                                                                                                            | HOSPITAL COMARCAL DE MELILLA                                                                                                                                                                                                                                                                                                                                                                                                                                                                                                                                                                                                                                                                                                                                                                                                                                                                                                                                                                     | Instituto de Salud Carlos III                                                                                                                                                                                     |                                                                         | Vázquez-Morón, S. Iglesias-Caballero, M. Sandoñis, V. Camarero, S. Pozo, F. Casas, I. Jiménez, P. Zaballos, A. Monzón, S. Varona, S. Cuesta, I. Roman. S.                                                                                                                                                                    |
| EPI_ISL_1261500                                                                                                                                                                                            | HOSPITAL LOS ARCOS                                                                                                                                                                                                                                                                                                                                                                                                                                                                                                                                                                                                                                                                                                                                                                                                                                                                                                                                                                               | Instituto de Salud Carlos III                                                                                                                                                                                     |                                                                         | Sandoñis, V. Vázquez-Morón, S. Iglesias-Caballero, M. Camarero, S. Pozo, F. Casas, I. Jiménez, P. Zaballos, A. Monzón, S. Varona, S. Cuesta, I. Camara, M.                                                                                                                                                                   |
| EPI_ISL_1261713, EPI_ISL_1261774                                                                                                                                                                           | Iressef Genomics lab                                                                                                                                                                                                                                                                                                                                                                                                                                                                                                                                                                                                                                                                                                                                                                                                                                                                                                                                                                             | IRSESSEF                                                                                                                                                                                                          |                                                                         | Souleymane MBOUP, Abdou PADANE, Abdoulie KANTEH , Abdul Karim SESAY , Khadim GUEYE, Papa Alassane DIAW, Birahim Piere NDIAYE, Barada CISSE, Aminata MBOUP, Moustapha MBOW, Ndeye Coumba Touré KANE, Nafisatou LEYE, Gora LO, Ambroise AHOUIDI , Astou Gaye GAYE, Aminata DIA, Yacine DIA                                     |
| EPI_ISL_1261797                                                                                                                                                                                            | OCME Office Of Chief Medical Examiner                                                                                                                                                                                                                                                                                                                                                                                                                                                                                                                                                                                                                                                                                                                                                                                                                                                                                                                                                            | New York City Public Health Laboratory                                                                                                                                                                            |                                                                         | Jade Wang, et al.                                                                                                                                                                                                                                                                                                            |
| EPI_ISL_1261801                                                                                                                                                                                            | DOHMH Central Harlem                                                                                                                                                                                                                                                                                                                                                                                                                                                                                                                                                                                                                                                                                                                                                                                                                                                                                                                                                                             | New York City Public Health Laboratory                                                                                                                                                                            |                                                                         | Jade Wang, et al.                                                                                                                                                                                                                                                                                                            |
| EPI_ISL_1261802                                                                                                                                                                                            | DOHMH Jamaica                                                                                                                                                                                                                                                                                                                                                                                                                                                                                                                                                                                                                                                                                                                                                                                                                                                                                                                                                                                    | New York City Public Health Laboratory                                                                                                                                                                            |                                                                         | Jade Wang, et al.                                                                                                                                                                                                                                                                                                            |
| EPI_ISL_1261807, EPI_ISL_1261808                                                                                                                                                                           | DOHMH Central Harlem                                                                                                                                                                                                                                                                                                                                                                                                                                                                                                                                                                                                                                                                                                                                                                                                                                                                                                                                                                             | New York City Public Health Laboratory                                                                                                                                                                            |                                                                         | Jade Wang, et al.                                                                                                                                                                                                                                                                                                            |
| EPI_ISL_1262072                                                                                                                                                                                            | HOSPITAL GENERAL UNIVERSITARIO SANTA LUCIA                                                                                                                                                                                                                                                                                                                                                                                                                                                                                                                                                                                                                                                                                                                                                                                                                                                                                                                                                       | Instituto de Salud Carlos III                                                                                                                                                                                     |                                                                         | Sandoñis, V. Vázquez-Morón, S. Iglesias-Caballero, M. Camarero, S. Pozo, F. Casas, I. Jiménez, P. Zaballos, A. Monzón, S. Varona, S. Cuesta, I. Blazquez, A.                                                                                                                                                                 |
| EPI_ISL_1262123                                                                                                                                                                                            | HOSPITAL COMARCAL DE MELILLA                                                                                                                                                                                                                                                                                                                                                                                                                                                                                                                                                                                                                                                                                                                                                                                                                                                                                                                                                                     | Instituto de Salud Carlos III                                                                                                                                                                                     |                                                                         | Vázquez-Morón, S. Iglesias-Caballero, M. Sandoñis, V. Camarero, S. Pozo, F. Casas, I. Jiménez, P. Zaballos, A. Monzón, S. Varona, S. Cuesta, I. Roman, S.                                                                                                                                                                    |
| EPI_ISL_1262509, EPI_ISL_1262511, EPI_ISL_1262521, EPI_ISL_1262522, EPI_ISL_1262523, EPI_ISL_1262524, EPI_ISL_1262528, EPI_ISL_1262531                                                                     | NYU Langone Health                                                                                                                                                                                                                                                                                                                                                                                                                                                                                                                                                                                                                                                                                                                                                                                                                                                                                                                                                                               | Departments of Pathology and Medicine, New York University School of Medicine                                                                                                                                     |                                                                         | Adriana Heguy, Dacia Dimartino, Emily Guzman, Christian Marier, Peter Meyn, Sitharam Ramaswami, Gael Westby, Paul Zappile, Yutong Zhang, Paolo Cotzia, Guiqing Wang                                                                                                                                                          |
| EPI_ISL_1262827, EPI_ISL_1262828, EPI_ISL_1262879                                                                                                                                                          | hopital                                                                                                                                                                                                                                                                                                                                                                                                                                                                                                                                                                                                                                                                                                                                                                                                                                                                                                                                                                                          | National Reference Center for Viruses of Respiratory Infections, Institut Pasteur, Paris                                                                                                                          |                                                                         | Marion Barbet, Sylvie Behillil, Méline Bizard, Angela Brisebarre, Camille Capel, Etienne Simon-Lorière, Vincent Enouf, Maud Vanpeene, Sylvie van der Werf, Gastli Nabil                                                                                                                                                      |
| EPI_ISL_1262914                                                                                                                                                                                            | Hopital                                                                                                                                                                                                                                                                                                                                                                                                                                                                                                                                                                                                                                                                                                                                                                                                                                                                                                                                                                                          | National Reference Center for Viruses of Respiratory Infections, Institut Pasteur, Paris                                                                                                                          |                                                                         | Marion Barbet, Sylvie Behillil, Méline Bizard, Angela Brisebarre, Camille Capel, Etienne Simon-Lorière, Vincent Enouf, Maud Vanpeene, Sylvie van der Werf, Irimia Alix                                                                                                                                                       |
| EPI_ISL_1263006, EPI_ISL_1263021                                                                                                                                                                           | Labo Analyses Med                                                                                                                                                                                                                                                                                                                                                                                                                                                                                                                                                                                                                                                                                                                                                                                                                                                                                                                                                                                | National Reference Center for Viruses of Respiratory Infections, Institut Pasteur, Paris                                                                                                                          |                                                                         | Marion Barbet, Sylvie Behillil, Méline Bizard, Angela Brisebarre, Camille Capel, Etienne Simon-Lorière, Vincent Enouf, Maud Vanpeene, Sylvie van der Werf, Roquebert Bénédicte                                                                                                                                               |
| EPI_ISL_1263060                                                                                                                                                                                            | Labo Analyses Med                                                                                                                                                                                                                                                                                                                                                                                                                                                                                                                                                                                                                                                                                                                                                                                                                                                                                                                                                                                | National Reference Center for Viruses of Respiratory Infections, Institut Pasteur, Paris                                                                                                                          |                                                                         | Marion Barbet, Sylvie Behillil, Méline Bizard, Angela Brisebarre, Camille Capel, Etienne Simon-Lorière, Vincent Enouf, Maud Vanpeene, Sylvie van der Werf, Roquebert Bénédicte                                                                                                                                               |
| EPI_ISL_1263324                                                                                                                                                                                            | Kansas Health and Environmental Lab                                                                                                                                                                                                                                                                                                                                                                                                                                                                                                                                                                                                                                                                                                                                                                                                                                                                                                                                                              | Kansas Health and Environmental Lab                                                                                                                                                                               |                                                                         | Mike Grose, Jonathan Barnell, Ben Olsen, and Phil Adam                                                                                                                                                                                                                                                                       |
| EPI_ISL_1263460                                                                                                                                                                                            | Institute for Medical Research, Infectious Disease Research Centre, National Institutes of Health, Ministry of Health Malaysia                                                                                                                                                                                                                                                                                                                                                                                                                                                                                                                                                                                                                                                                                                                                                                                                                                                                   | Institute for Medical Research, Infectious Disease Research Centre, National Institutes of Health, Ministry of Health Malaysia                                                                                    |                                                                         | Suppiah J, Kamel K, Mohd Zawawi Z, Azizan MA, Thayan R                                                                                                                                                                                                                                                                       |
| EPI_ISL_1264270                                                                                                                                                                                            | Lighthouse Lab in Glasgow                                                                                                                                                                                                                                                                                                                                                                                                                                                                                                                                                                                                                                                                                                                                                                                                                                                                                                                                                                        | Wellcome Sanger Institute for the COVID-19 Genomics UK (COG-UK) Consortium                                                                                                                                        |                                                                         | Harper VanSteenhouse, Yumi Kasai, David Gray, Carol Clugston, Anna Dominiczak and Alex Alderton, Roberto Amato, Jeffrey Barrett, Sonia Goncalves, Ewan Harrison, David K. Jackson, Ian Johnston, Dominic Kwiatkowski, Cordelia Langford, John Sillitoe on behalf of the Wellcome Sanger Institute COVID-19 Surveillance Team |
| EPI_ISL_1264286, EPI_ISL_1264339                                                                                                                                                                           | Lighthouse Lab in Milton Keynes                                                                                                                                                                                                                                                                                                                                                                                                                                                                                                                                                                                                                                                                                                                                                                                                                                                                                                                                                                  | Wellcome Sanger Institute for the COVID-19 Genomics UK (COG-UK) Consortium                                                                                                                                        |                                                                         | The Lighthouse Lab in Milton Keynes and Alex Alderton, Roberto Amato, Jeffrey Barrett, Sonia Goncalves, Ewan Harrison, David K. Jackson, Ian Johnston, Dominic Kwiatkowski, Cordelia Langford, John Sillitoe on behalf of the Wellcome Sanger Institute COVID-19 Surveillance Team                                           |
| EPI_ISL_1264457                                                                                                                                                                                            | Lighthouse Lab in Alderley Park                                                                                                                                                                                                                                                                                                                                                                                                                                                                                                                                                                                                                                                                                                                                                                                                                                                                                                                                                                  | Wellcome Sanger Institute for the COVID-19 Genomics UK (COG-UK) Consortium                                                                                                                                        |                                                                         | Jacquelyn Wynn, Mairead Hyland, The Lighthouse Lab in Alderley Park and Alex Alderton, Roberto Amato, Jeffrey Barrett, Sonia Goncalves, Ewan Harrison, David K. Jackson, Ian Johnston, Dominic Kwiatkowski, Cordelia Langford, John Sillitoe on behalf of the Wellcome Sanger Institute COVID-19 Surveillance Team           |
| EPI_ISL_1264712                                                                                                                                                                                            | Lighthouse Lab in Glasgow                                                                                                                                                                                                                                                                                                                                                                                                                                                                                                                                                                                                                                                                                                                                                                                                                                                                                                                                                                        | Wellcome Sanger Institute for the COVID-19 Genomics UK (COG-UK) Consortium                                                                                                                                        |                                                                         | Harper VanSteenhouse, Yumi Kasai, David Gray, Carol Clugston, Anna Dominiczak and Alex Alderton, Roberto Amato, Jeffrey Barrett, Sonia Goncalves, Ewan Harrison, David K. Jackson, Ian Johnston, Dominic Kwiatkowski, Cordelia Langford, John Sillitoe on behalf of the Wellcome Sanger Institute COVID-19 Surveillance Team |
| EPI_ISL_1265393                                                                                                                                                                                            | 1. Wojewódzka Stacja Sanitarno - Epidemiologiczna w Katowicach (WSSE Katowice); 2. Wojewódzka Stacja Sanitarno - Epidemiologiczna w Kielcach (WSSE Kielce); 3. Wojewódzka Stacja Sanitarno - Epidemiologiczna w Szczecinie (WSSE Szczecin); 4. Wojewódzka Stacja Sanitarno - Epidemiologiczna w Lublinie (WSSE Lublin); 5. Wojewódzka Stacja Sanitarno - Epidemiologiczna w Gorzowie Wielkopolskim (WSSE Gorzów Wielkopolski); 6. Wojewódzka Stacja Sanitarno-Epidemiologiczna w Gdasku (WSSE Gdask); 7. Wojewódzka Stacja Sanitarno-Epidemiologiczna w Poznaniu (WSSE Poznań); 8. Wojewódzka Stacja Sanitarno-Epidemiologiczna w Opolu (WSSE Opole); 9. Wojewódzka Stacja Sanitarno-Epidemiologiczna we Wrocławiu (WSSE Wrocław); 10. Wojewódzka Stacja Sanitarno-Epidemiologiczna w Krakowie (WSSE Kraków); 11. Wojewódzka Stacja Sanitarno-Epidemiologiczna w Olsztynie (WSSE Olsztyn); 12. Wojewódzka Stacja Sanitarno-Epidemiologiczna w Bydgoszczy (WSSE Bydgoszcz); 13. Wojewódzka Stacja | 1. ViroGenetics - BSL3 Laboratory of Virology, Maopolska Centre of Biotechnology, Jagiellonian University; 2. Human Genome Variation Research Group, Malopolska Centre of Biotechnology, Jagiellonian University; |                                                                         | Klajmon, A., Mazur-Panasiuk, N., Szulc, P., Kowalski, M., Gromowski, T., Marszalek, K., Labaj, P. P., Branicki, W., Pyrc, K.                                                                                                                                                                                                 |

|                                                                                                            |                                                                                                                                             |                                                                                                                                         |                                                                                                                                                                                                                                                                                                                                                                                                                                                                                                                                                                                                                                                                                                                                                                                                                                                                                                                                                                                                                                                     |
|------------------------------------------------------------------------------------------------------------|---------------------------------------------------------------------------------------------------------------------------------------------|-----------------------------------------------------------------------------------------------------------------------------------------|-----------------------------------------------------------------------------------------------------------------------------------------------------------------------------------------------------------------------------------------------------------------------------------------------------------------------------------------------------------------------------------------------------------------------------------------------------------------------------------------------------------------------------------------------------------------------------------------------------------------------------------------------------------------------------------------------------------------------------------------------------------------------------------------------------------------------------------------------------------------------------------------------------------------------------------------------------------------------------------------------------------------------------------------------------|
|                                                                                                            | Sanitarno-Epidemiologiczna w Rzeszowie (WSSE Rzeszów);<br>14. Wojewódzka Stacja Sanitarno-Epidemiologiczna w<br>Biaymstoku (WSSE Biaystok); |                                                                                                                                         |                                                                                                                                                                                                                                                                                                                                                                                                                                                                                                                                                                                                                                                                                                                                                                                                                                                                                                                                                                                                                                                     |
| EPI_ISL_1265464                                                                                            | HOPITAL UNIVERSITAIRE DE FORT DE FRANCE                                                                                                     | CNR Virus des Infections Respiratoires - France SUD                                                                                     | Antonin Bal, Gregory Destras, Gwendolynne Burfin, Hadrien Regue, Quentin Semanas, Martine Valette, Bruno Lina, Laurence Josset                                                                                                                                                                                                                                                                                                                                                                                                                                                                                                                                                                                                                                                                                                                                                                                                                                                                                                                      |
| EPI_ISL_1265525, EPI_ISL_1265532                                                                           | BIOMNIS LYON                                                                                                                                | CNR Virus des Infections Respiratoires - France SUD                                                                                     | Antonin Bal, Gregory Destras, Gwendolynne Burfin, Hadrien Regue, Quentin Semanas, Martine Valette, Bruno Lina, Laurence Josset                                                                                                                                                                                                                                                                                                                                                                                                                                                                                                                                                                                                                                                                                                                                                                                                                                                                                                                      |
| EPI_ISL_1265546                                                                                            | HOPITAL UNIVERSITAIRE DE FORT DE FRANCE                                                                                                     | CNR Virus des Infections Respiratoires - France SUD                                                                                     | Antonin Bal, Gregory Destras, Gwendolynne Burfin, Hadrien Regue, Quentin Semanas, Martine Valette, Bruno Lina, Laurence Josset                                                                                                                                                                                                                                                                                                                                                                                                                                                                                                                                                                                                                                                                                                                                                                                                                                                                                                                      |
| EPI_ISL_1265803, EPI_ISL_1265805,<br>EPI_ISL_1265812                                                       | CNR Virus des Infections Respiratoires - France SUD                                                                                         | CNR Virus des Infections Respiratoires - France SUD                                                                                     | Antonin Bal, Gregory Destras, Gwendolynne Burfin, Hadrien Regue, Quentin Semanas, Martine Valette, Bruno Lina, Laurence Josset                                                                                                                                                                                                                                                                                                                                                                                                                                                                                                                                                                                                                                                                                                                                                                                                                                                                                                                      |
| EPI_ISL_1266255, EPI_ISL_1266477                                                                           | National Laboratory for Health, Environment and Food, OMM,<br>Maribor                                                                       | CISLD (Clinical Institute of Special Laboratory Diagnostics),<br>University Children's Hospital, University Medical Center<br>Ljubljana | Jernej Kova, Barbara Jenko Bizjan, Tine Tesovnik, Robert Sket, Katarina Kozmos, Ana Grom, Maruša Debeljak, Marko Pokorn, Tadej Battelino                                                                                                                                                                                                                                                                                                                                                                                                                                                                                                                                                                                                                                                                                                                                                                                                                                                                                                            |
| EPI_ISL_1267288, EPI_ISL_1267290                                                                           | Vault Health                                                                                                                                | Minnesota Department of Health, Public Health Laboratory                                                                                | Alexandra Lorentz, Jacob Garfin, Matt Plumb, and Xiong Wang                                                                                                                                                                                                                                                                                                                                                                                                                                                                                                                                                                                                                                                                                                                                                                                                                                                                                                                                                                                         |
| EPI_ISL_1268228                                                                                            | DPHL                                                                                                                                        | Delaware Public Health Lab                                                                                                              | Rebecca Savage                                                                                                                                                                                                                                                                                                                                                                                                                                                                                                                                                                                                                                                                                                                                                                                                                                                                                                                                                                                                                                      |
| EPI_ISL_1272059                                                                                            | Hospital Universitario Virgen de las Nieves de Granada-SAS                                                                                  | SeqCOVID-SPAIN consortium/IBV(CSIC)                                                                                                     | Sara Sanbonmatsu Gámez, Irene Pedrosa Corral, José M. Navarro-Mari and SeqCOVID-SPAIN consortium                                                                                                                                                                                                                                                                                                                                                                                                                                                                                                                                                                                                                                                                                                                                                                                                                                                                                                                                                    |
| EPI_ISL_1272220                                                                                            | MD PHL                                                                                                                                      | MD PHL                                                                                                                                  | Maryland Department of Health Laboratories Administration                                                                                                                                                                                                                                                                                                                                                                                                                                                                                                                                                                                                                                                                                                                                                                                                                                                                                                                                                                                           |
| EPI_ISL_1272465, EPI_ISL_1272482,<br>EPI_ISL_1272491, EPI_ISL_1272545,<br>EPI_ISL_1272547                  | Hospital General Universitario Gregorio Marañón                                                                                             | SeqCOVID-SPAIN consortium/IBV(CSIC)                                                                                                     | Darío García de Viedma, Laura Pérez-Lago, Pedro J Sola-Campoy, Sergio Buenestado-Serrano, Marta Herranz, Víctor Manuel de la Cueva, Julia Suárez,<br>Pilar Catalán, Patricia Muñoz and SeqCOVID-SPAIN consortium                                                                                                                                                                                                                                                                                                                                                                                                                                                                                                                                                                                                                                                                                                                                                                                                                                    |
| EPI_ISL_1272579                                                                                            | Hospital Universitario 12 de Octubre                                                                                                        | SeqCOVID-SPAIN consortium/IBV(CSIC)                                                                                                     | Esther Viedma, Raúl Recio, Mar Aguilera, Sagrario Zurita, Irene Muñoz-Gallego, Jennifer Villa, Rafael Delgado, M.ª Dolores Folgueira and<br>SeqCOVID-SPAIN consortiumconsortium                                                                                                                                                                                                                                                                                                                                                                                                                                                                                                                                                                                                                                                                                                                                                                                                                                                                     |
| EPI_ISL_1273209                                                                                            | Lab voor klinische biologie                                                                                                                 | Lab voor klinische biologie                                                                                                             | Marija Janevska, Hannelore Hamerlinck, Bruno Verhasselt                                                                                                                                                                                                                                                                                                                                                                                                                                                                                                                                                                                                                                                                                                                                                                                                                                                                                                                                                                                             |
| EPI_ISL_1273214                                                                                            | Oxford University Clinical Research Unit (OUCRU)                                                                                            | Oxford University Clinical Research Unit (OUCRU)                                                                                        | Nguyen Van Vinh Chau, Nguyen Thi Thu Hong, Nghiem My Ngoc, Nguyen To Anh, Huynh Trung Trieu, Le Nguyen Truc Nhu, Lam Minh Yen, Ngo Ngoc<br>Quang Minh, Nguyen Thanh Phong, Nguyen Thanh Truong, le Thi Thu Huong, Tran Nguyen Hoang Tu, Le Manh Hung, Tran Tan Thanh, Nguyen Thanh<br>Dung, Nguyen Tri Dung, Guy Thwaites, Le Van Tan                                                                                                                                                                                                                                                                                                                                                                                                                                                                                                                                                                                                                                                                                                               |
| EPI_ISL_1273293, EPI_ISL_1273304                                                                           | Texas Department of State Health Services (TXDSHS)                                                                                          | Texas Department of State Health Services (TXDSHS)                                                                                      | Rashmi Tuladhar, Bonnie Oh, Jenny Zhang, Maliha Rahman, Mayela Pedrueza, Anita Pokharel, Myong Koag, Chun Wang, Rachel Lee, Grace Kubin                                                                                                                                                                                                                                                                                                                                                                                                                                                                                                                                                                                                                                                                                                                                                                                                                                                                                                             |
| EPI_ISL_1273364                                                                                            | The Jackson Laboratory                                                                                                                      | The Jackson Laboratory                                                                                                                  | Bergeron D, Renzette N, Adams M, Omerza G, Kelly K, Li L                                                                                                                                                                                                                                                                                                                                                                                                                                                                                                                                                                                                                                                                                                                                                                                                                                                                                                                                                                                            |
| EPI_ISL_1273791, EPI_ISL_1273795,<br>EPI_ISL_1273801, EPI_ISL_1273802                                      | WSSE Gdask                                                                                                                                  | 1. National Institute of Public Health - National Institute of<br>Hygiene; 2. Eurofins Genomics Europe Sequencing GmbH                  | Wokowicz Tomasz, Zacharczuk Katarzyna, Sadkowska-Todys Magorzata, Gierczyki Rafa, Eurofins Genomics Europe Sequencing Team, ECDC COVID-19<br>WGS support team                                                                                                                                                                                                                                                                                                                                                                                                                                                                                                                                                                                                                                                                                                                                                                                                                                                                                       |
| EPI_ISL_1273811, EPI_ISL_1273812                                                                           | Regionalne Centrum Krwiodawstwa i Krwiolecznictwa w<br>Biaymstoku Pracownia Diagnostyki Molekularnej wirusa<br>SARS-CoV-2                   | 1. National Institute of Public Health - National Institute of<br>Hygiene; 2. Eurofins Genomics Europe Sequencing GmbH                  | Wokowicz Tomasz, Zacharczuk Katarzyna, Sadkowska-Todys Magorzata, Gierczyki Rafa, Eurofins Genomics Europe Sequencing Team, ECDC COVID-19<br>WGS support team                                                                                                                                                                                                                                                                                                                                                                                                                                                                                                                                                                                                                                                                                                                                                                                                                                                                                       |
| EPI_ISL_1273821                                                                                            | RCKIK                                                                                                                                       | 1. National Institute of Public Health - National Institute of<br>Hygiene; 2. Eurofins Genomics Europe Sequencing GmbH                  | Wokowicz Tomasz, Zacharczuk Katarzyna, Sadkowska-Todys Magorzata, Gierczyki Rafa, Eurofins Genomics Europe Sequencing Team, ECDC COVID-19<br>WGS support team                                                                                                                                                                                                                                                                                                                                                                                                                                                                                                                                                                                                                                                                                                                                                                                                                                                                                       |
| EPI_ISL_1273825                                                                                            | WSSE Olsztyn                                                                                                                                | 1. National Institute of Public Health - National Institute of<br>Hygiene; 2. Eurofins Genomics Europe Sequencing GmbH                  | Wokowicz Tomasz, Zacharczuk Katarzyna, Sadkowska-Todys Magorzata, Gierczyki Rafa, Eurofins Genomics Europe Sequencing Team, ECDC COVID-19<br>WGS support team                                                                                                                                                                                                                                                                                                                                                                                                                                                                                                                                                                                                                                                                                                                                                                                                                                                                                       |
| EPI_ISL_1273830                                                                                            | Centrum Medycyny Klinicznej i Estetycznej DiMedical Sp. z<br>o.o.                                                                           | 1. National Institute of Public Health - National Institute of<br>Hygiene; 2. Eurofins Genomics Europe Sequencing GmbH                  | Wokowicz Tomasz, Zacharczuk Katarzyna, Sadkowska-Todys Magorzata, Gierczyki Rafa, Eurofins Genomics Europe Sequencing Team, ECDC COVID-19<br>WGS support team                                                                                                                                                                                                                                                                                                                                                                                                                                                                                                                                                                                                                                                                                                                                                                                                                                                                                       |
| EPI_ISL_1278093                                                                                            | Emory Molecular Diagnostics Laboratory, Emory Healthcare                                                                                    | Piantadosi Lab, Emory Department of Pathology                                                                                           | Ahmed Babiker, Anne Piantadosi                                                                                                                                                                                                                                                                                                                                                                                                                                                                                                                                                                                                                                                                                                                                                                                                                                                                                                                                                                                                                      |
| EPI_ISL_1278131                                                                                            | NL-Dr. Leonard A. Miller Centre for Health Services                                                                                         | National Microbiology Laboratory (NML)                                                                                                  | Anna Majer, Shari Tyson, Grace Seo, Philip Mabon, Elsie Grudeski, Rhiannon Huzarewich, Russell Mandes, Anneliese Landgraff, Jennifer Tanner, Natalie<br>Knox, Morag Graham, Gary Van Domselaar, Robert Needle, Yang Yu, Adel Malek, Laura Gilbert, George Zahariadis, Nathalie Bastien, Yan Li, Timothy<br>Booth, Darian Hole, Madison Chapel, Kirsten Biggar, Kerri Smith, CanCOGeN's metadata curation team, Public Health Agency of Canada CanCOGeN<br>team                                                                                                                                                                                                                                                                                                                                                                                                                                                                                                                                                                                      |
| EPI_ISL_1278496, EPI_ISL_1278713,<br>EPI_ISL_1278724, EPI_ISL_1278799,<br>EPI_ISL_1278819                  | Cialit Health Services Laboratories, Israel                                                                                                 | Stern Lab                                                                                                                               | Stern Lab                                                                                                                                                                                                                                                                                                                                                                                                                                                                                                                                                                                                                                                                                                                                                                                                                                                                                                                                                                                                                                           |
| EPI_ISL_1278993, EPI_ISL_1279010,<br>EPI_ISL_1279038, EPI_ISL_1279063,<br>EPI_ISL_1279069, EPI_ISL_1279073 | Department of Virology and Immunology, University of<br>Helsinki and Helsinki University Hospital, Huslab Finland                           | Department of Virology, Faculty of Medicine, University of<br>Helsinki, Helsinki, Finland                                               | Teemu Smura, Ravi Kant, Phuoc Truong, Hussein Alburkat, Hannimari Kallio-Kokko, Jenni Virtanen, Maija Suvanto, Essi Korhonen, Sari Hannula, Harri<br>Kangas, Hanna Liimatainen, Satu Kurkela, Hanna Jarva, Maija Lappalainen, Pekka Ellonen, Olli Vapalahti                                                                                                                                                                                                                                                                                                                                                                                                                                                                                                                                                                                                                                                                                                                                                                                         |
| EPI_ISL_1279266                                                                                            | Centro de Investigación Biomédica del Noreste (CIBIN)                                                                                       | Instituto Nacional de Enfermedades Respiratorias (INER);<br>Centro de Investigación en Enfermedades Infecciosas (CIENI)                 | Consortio Mexicano de Vigilancia Genómica (CoViGen-Mex). Authors (in alphabetical order): Julio Elias Alvarado-Yaah, Carlos F. Arias, Santiago<br>Ávila-Ríos, Víctor Hugo Borja-Aburto, Celia Boukadida, Juan Bautista Chale-Dzul , José Antonio Enciso-Moreno, Gloria Elena Espinoza-Ayala, Fernando<br>Fontove-Herrera, Concepción Grajales-Muñiz, Ricardo Grande, Alfredo Herrera-Estrella, Carla Ivón Herrera-Najera, Pavel Isa, Brenda Irasema<br>Maldonado-Meza, Bernardo Martínez-Miguel, Margarita Matías-Florentino, María Guadalupe de Jesús Mireles-Rivera, Gloria María Molina-Salinas, Hector<br>Montoya-Fuentes, José Esteban Muñoz-Medina, José de Jesús Nuñez-Contreras, Alicia Ocaña-Mondragón, Luis Alberto Ochoa-Carrera, Hector Esteban<br>Paz-Juárez, Francisco Pulido, Helen Haydee Fernanda Ramirez-Plascencia, Angel Gustavo Salas-Lais, Jorge Ivan Salinal-Nevarez, Alejandro<br>Sanchez-Flores, Clara Esperanza Santacruz-Tinoco, María Guadalupe Santiago-Mauricio , Nelly Sélem-Mojica, Blanca Taboada , Gloria Vazquez |
| EPI_ISL_1280092                                                                                            | Department of Genetics, Medirex                                                                                                             | Laboratory of Genomics and Bioinformatics, Comenius<br>University Science Park                                                          | Tatiana Sedláková, Miroslav Böhmer, Renáta Lukaková, Gabriel Minárik, Anna Giová, Werner Krampf, Diana Rusáková, Jaroslav Budiš, Tomáš Szemes                                                                                                                                                                                                                                                                                                                                                                                                                                                                                                                                                                                                                                                                                                                                                                                                                                                                                                       |
| EPI_ISL_1287387, EPI_ISL_1287389                                                                           | Croatian Institute of Public Health                                                                                                         | Croatian Institute of Public Health                                                                                                     | Irena Tabain, Ivana Ferenak                                                                                                                                                                                                                                                                                                                                                                                                                                                                                                                                                                                                                                                                                                                                                                                                                                                                                                                                                                                                                         |
| EPI_ISL_1287412, EPI_ISL_1287526,<br>EPI_ISL_1287681, EPI_ISL_1287693                                      | Istituto Zooprofilattico Sperimentale del Mezzogiorno                                                                                       | TIGEM                                                                                                                                   | Antonio Grimaldi Patrizia Annunziata Francesco Panariello Biancamaria Pierri Claudia Tiberio Valentina Bouche Chiara Colantuono Maria Concetta Cuomo<br>Denise Di Concilio Lucio Di Filippo Anna Manfredi Marcello Salvi Antonio Limone Luigi Atripaldi Pellegrino Cerino Andrea Ballabio Davide Cacchiarelli                                                                                                                                                                                                                                                                                                                                                                                                                                                                                                                                                                                                                                                                                                                                       |
| EPI_ISL_1287761, EPI_ISL_1287767                                                                           | Unidad de Investigación Biomédica de Zacatecas (UIBZ)                                                                                       | Instituto Nacional de Enfermedades Respiratorias (INER);<br>Centro de Investigación en Enfermedades Infecciosas (CIENI)                 | Consortio Mexicano de Vigilancia Genómica (CoViGen-Mex). Authors (in alphabetical order): Julio Elias Alvarado-Yaah, Carlos F. Arias, Santiago<br>Ávila-Ríos, Víctor Hugo Borja-Aburto, Celia Boukadida, Juan Bautista Chale-Dzul , José Antonio Enciso-Moreno, Gloria Elena Espinoza-Ayala, Fernando<br>Fontove-Herrera, Concepción Grajales-Muñiz, Ricardo Grande, Alfredo Herrera-Estrella, Carla Ivón Herrera-Najera, Pavel Isa, Brenda Irasema<br>Maldonado-Meza, Bernardo Martínez-Miguel, Margarita Matías-Florentino, María Guadalupe de Jesús Mireles-Rivera, Gloria María Molina-Salinas, Hector<br>Montoya-Fuentes, José Esteban Muñoz-Medina, José de Jesús Nuñez-Contreras, Alicia Ocaña-Mondragón, Luis Alberto Ochoa-Carrera, Hector Esteban<br>Paz-Juárez, Francisco Pulido, Helen Haydee Fernanda Ramirez-Plascencia, Angel Gustavo Salas-Lais, Jorge Ivan Salinal-Nevarez, Alejandro<br>Sanchez-Flores, Clara Esperanza Santacruz-Tinoco, María Guadalupe Santiago-Mauricio , Nelly Sélem-Mojica, Blanca Taboada , Gloria Vazquez |
| EPI_ISL_1287779                                                                                            | Kansas Health and Environmental Lab                                                                                                         | Cytocheck Laboratory                                                                                                                    | Mike Grose, Jonathan Barnell, Ben Olsen, and Phil Adam                                                                                                                                                                                                                                                                                                                                                                                                                                                                                                                                                                                                                                                                                                                                                                                                                                                                                                                                                                                              |
| EPI_ISL_1288124, EPI_ISL_1288139                                                                           | Dutch COVID-19 response team                                                                                                                | National Institute for Public Health and the Environment<br>(RIVM)                                                                      | Adam Meijer, Harry Vennema, Dirk Eggink, Jeroen Cremer, Sharon van den Brink, Bas van der Veer, AnneMara van den Brandt, Florian Zwagemaker,<br>Dennis Schmitz, Chantal Reusken, on behalf of the national COVID-19 response team                                                                                                                                                                                                                                                                                                                                                                                                                                                                                                                                                                                                                                                                                                                                                                                                                   |
| EPI_ISL_1289449, EPI_ISL_1289457,<br>EPI_ISL_1289460, EPI_ISL_1289561,                                     | Michigan Department of Health and Human Services, Bureau<br>of Laboratories                                                                 | Michigan Department of Health and Human Services, Bureau<br>of Laboratories                                                             | Blankenship HM, Riner D, Soehlen MK                                                                                                                                                                                                                                                                                                                                                                                                                                                                                                                                                                                                                                                                                                                                                                                                                                                                                                                                                                                                                 |

|                                                                                                                                                                                                                                                                                                                                                                                                                                                                                                                                                                                                                                                                                                                                                                                                                                                                                                                                                      |           |                                                                                                                             |                                                                                                                                                                                                                                                                                                                                                                                                                                                                                                                                                                                                                                                                                                                                                                                                                                                                                                        |
|------------------------------------------------------------------------------------------------------------------------------------------------------------------------------------------------------------------------------------------------------------------------------------------------------------------------------------------------------------------------------------------------------------------------------------------------------------------------------------------------------------------------------------------------------------------------------------------------------------------------------------------------------------------------------------------------------------------------------------------------------------------------------------------------------------------------------------------------------------------------------------------------------------------------------------------------------|-----------|-----------------------------------------------------------------------------------------------------------------------------|--------------------------------------------------------------------------------------------------------------------------------------------------------------------------------------------------------------------------------------------------------------------------------------------------------------------------------------------------------------------------------------------------------------------------------------------------------------------------------------------------------------------------------------------------------------------------------------------------------------------------------------------------------------------------------------------------------------------------------------------------------------------------------------------------------------------------------------------------------------------------------------------------------|
| EPI_ISL_1289601                                                                                                                                                                                                                                                                                                                                                                                                                                                                                                                                                                                                                                                                                                                                                                                                                                                                                                                                      |           |                                                                                                                             |                                                                                                                                                                                                                                                                                                                                                                                                                                                                                                                                                                                                                                                                                                                                                                                                                                                                                                        |
| EPI_ISL_1291199, EPI_ISL_1291201, EPI_ISL_1291205, EPI_ISL_1291217, EPI_ISL_1291231, EPI_ISL_1291238, EPI_ISL_1291251, EPI_ISL_1291252, EPI_ISL_1291253, EPI_ISL_1291257, EPI_ISL_1291258, EPI_ISL_1291259, EPI_ISL_1291279, EPI_ISL_1291289, EPI_ISL_1291300, EPI_ISL_1291301                                                                                                                                                                                                                                                                                                                                                                                                                                                                                                                                                                                                                                                                       | see above | Laboratory Corporation of America                                                                                           | Centers for Disease Control and Prevention Division of Viral Diseases, Pathogen Discovery                                                                                                                                                                                                                                                                                                                                                                                                                                                                                                                                                                                                                                                                                                                                                                                                              |
|                                                                                                                                                                                                                                                                                                                                                                                                                                                                                                                                                                                                                                                                                                                                                                                                                                                                                                                                                      |           |                                                                                                                             | Peter W. Cook, Dakota Howard, Dhvani Batra, Ben L. Rambo-Martin, Minoo Agarwal, Eyad Almasri Debbie Boles, Ayla Burns, Nuthawin Charoensri, Oren Cohen, Susan Countryman, Mary Ann Cristobal, Bobbi Croy, Suzanne Dale, Hrushikesh Deshmukh, Amanda Douglas, Vincent Drouillon, Marcia Eisenberg, Howard Engler, Rama Ghatti, Prashant Gupta, Susan Hicks, Jake Humphrey, Lax Iyer, Manoj Jain, Mohan Kolli, Brian Krueger, Tim Kuphal, Stanley Letovsky, Michael Levandoski, Craig Lukasik, Jonathan Meltzer, Brian Norvell, Mindy Nye, Scott Parker, Christos Petropoulos, John Pruitt, Steven Ragan, Scott Ryan, Mike Sapeta, Jana Schroth, Suresh Babu Selvaraju, Goran Stevovic, Amanda Suchanek, Andrea Throop, Lyndon Tilton, Thomas Urban, Joe Voshell, Kimberly Wagner, Jonathan Williams, Mary Williamson, Qian Zeng, Tricia Zwiefelhofer, Clinton R. Paden, Suxiang Tong, Duncan MacCannell |
| EPI_ISL_1291342, EPI_ISL_1291357, EPI_ISL_1291361, EPI_ISL_1291369                                                                                                                                                                                                                                                                                                                                                                                                                                                                                                                                                                                                                                                                                                                                                                                                                                                                                   |           | TXDSHS                                                                                                                      | TXDSHS                                                                                                                                                                                                                                                                                                                                                                                                                                                                                                                                                                                                                                                                                                                                                                                                                                                                                                 |
|                                                                                                                                                                                                                                                                                                                                                                                                                                                                                                                                                                                                                                                                                                                                                                                                                                                                                                                                                      |           |                                                                                                                             | Rashmi Tuladhar, Bonnie Oh, Jenny Zhang, Maliha Rahman, Mayela Pedrueza, Anita Pokharel, Myong Koag, Chun Wang, Rachel Lee, Grace Kubin                                                                                                                                                                                                                                                                                                                                                                                                                                                                                                                                                                                                                                                                                                                                                                |
| EPI_ISL_1291381, EPI_ISL_1291383, EPI_ISL_1291388, EPI_ISL_1291389, EPI_ISL_1291391, EPI_ISL_1291397, EPI_ISL_1291398, EPI_ISL_1291402, EPI_ISL_1291406, EPI_ISL_1291407, EPI_ISL_1291451, EPI_ISL_1291477, EPI_ISL_1291479, EPI_ISL_1291483, EPI_ISL_1291492, EPI_ISL_1291493, EPI_ISL_1291494, EPI_ISL_1291498, EPI_ISL_1291508, EPI_ISL_1291509, EPI_ISL_1291517, EPI_ISL_1291522, EPI_ISL_1291523, EPI_ISL_1291535, EPI_ISL_1291538, EPI_ISL_1291541, EPI_ISL_1291558, EPI_ISL_1291562, EPI_ISL_1291569, EPI_ISL_1291577, EPI_ISL_1291581                                                                                                                                                                                                                                                                                                                                                                                                        | see above | Quest Diagnostics Incorporated                                                                                              |                                                                                                                                                                                                                                                                                                                                                                                                                                                                                                                                                                                                                                                                                                                                                                                                                                                                                                        |
|                                                                                                                                                                                                                                                                                                                                                                                                                                                                                                                                                                                                                                                                                                                                                                                                                                                                                                                                                      |           |                                                                                                                             | Centers for Disease Control and Prevention Division of Viral Diseases, Pathogen Discovery                                                                                                                                                                                                                                                                                                                                                                                                                                                                                                                                                                                                                                                                                                                                                                                                              |
|                                                                                                                                                                                                                                                                                                                                                                                                                                                                                                                                                                                                                                                                                                                                                                                                                                                                                                                                                      |           |                                                                                                                             | Peter W. Cook, Dakota Howard, Dhvani Batra, Ben L. Rambo-Martin, S. H. Rosenthal, A. Gerasimova, R. M. Kagan, B. Anderson, M. Hua, Y. Liu, L.E. Bernstein, K.E. Livingston, A. Perez, I. A. Shlyakhter, R. V. Rolando, R. Owen, P. Tanpaiboon, F. Lachawan, Clinton R. Paden, Suxiang Tong, Duncan MacCannell                                                                                                                                                                                                                                                                                                                                                                                                                                                                                                                                                                                          |
| EPI_ISL_1291652                                                                                                                                                                                                                                                                                                                                                                                                                                                                                                                                                                                                                                                                                                                                                                                                                                                                                                                                      |           | Microbiology Division, South Carolina Department of Health and Environmental Control Public Health Laboratory (SC DHEC PHL) | Microbiology Division, South Carolina Department of Health and Environmental Control Public Health Laboratory (SC DHEC PHL)                                                                                                                                                                                                                                                                                                                                                                                                                                                                                                                                                                                                                                                                                                                                                                            |
|                                                                                                                                                                                                                                                                                                                                                                                                                                                                                                                                                                                                                                                                                                                                                                                                                                                                                                                                                      |           |                                                                                                                             | Haley Flores, Jessica Freeman                                                                                                                                                                                                                                                                                                                                                                                                                                                                                                                                                                                                                                                                                                                                                                                                                                                                          |
| EPI_ISL_1292174, EPI_ISL_1292196, EPI_ISL_1292394                                                                                                                                                                                                                                                                                                                                                                                                                                                                                                                                                                                                                                                                                                                                                                                                                                                                                                    |           | Sonora Quest Laboratories                                                                                                   | TGen North                                                                                                                                                                                                                                                                                                                                                                                                                                                                                                                                                                                                                                                                                                                                                                                                                                                                                             |
|                                                                                                                                                                                                                                                                                                                                                                                                                                                                                                                                                                                                                                                                                                                                                                                                                                                                                                                                                      |           |                                                                                                                             | "Jolene Bowers, Heather Centner, Chris French, Hayley Yaglom, Ashlyn Pfeiffer, Darrin Lemmer, Dave Engelthaler, The Arizona COVID Genomics Union (ACGU)"                                                                                                                                                                                                                                                                                                                                                                                                                                                                                                                                                                                                                                                                                                                                               |
| EPI_ISL_1292540, EPI_ISL_1292770                                                                                                                                                                                                                                                                                                                                                                                                                                                                                                                                                                                                                                                                                                                                                                                                                                                                                                                     |           | State Laboratories Division, Hawaii State Department of Health                                                              | State Laboratories Division, Hawaii State Department of Health                                                                                                                                                                                                                                                                                                                                                                                                                                                                                                                                                                                                                                                                                                                                                                                                                                         |
|                                                                                                                                                                                                                                                                                                                                                                                                                                                                                                                                                                                                                                                                                                                                                                                                                                                                                                                                                      |           |                                                                                                                             | Pamela O'Brien, Drew Kuwazaki, Ayana Garnet, Razvan Sultana, Edward Desmond                                                                                                                                                                                                                                                                                                                                                                                                                                                                                                                                                                                                                                                                                                                                                                                                                            |
| EPI_ISL_1292976, EPI_ISL_1292977, EPI_ISL_1292978                                                                                                                                                                                                                                                                                                                                                                                                                                                                                                                                                                                                                                                                                                                                                                                                                                                                                                    |           | Connecticut DPH                                                                                                             | Grubaugh Lab - Yale School of Public Health                                                                                                                                                                                                                                                                                                                                                                                                                                                                                                                                                                                                                                                                                                                                                                                                                                                            |
|                                                                                                                                                                                                                                                                                                                                                                                                                                                                                                                                                                                                                                                                                                                                                                                                                                                                                                                                                      |           |                                                                                                                             | Joseph Fauver, Mallery Breban, Isabell Ott, Tara Alpert, Mary Petrone, Anderson Brito, Chantal Vogels, Annie Watkins, Chaney Kalinich, Jessica Rothman, Anthony Muyombwe, Randy Downing, Jafar Razeq, Stephen M. Bart, Nathan Grubaugh                                                                                                                                                                                                                                                                                                                                                                                                                                                                                                                                                                                                                                                                 |
| EPI_ISL_1292986, EPI_ISL_1292987, EPI_ISL_1292988, EPI_ISL_1292989, EPI_ISL_1292994, EPI_ISL_1292997                                                                                                                                                                                                                                                                                                                                                                                                                                                                                                                                                                                                                                                                                                                                                                                                                                                 |           | Yale Clinical Virology Lab                                                                                                  | Grubaugh Lab - Yale School of Public Health                                                                                                                                                                                                                                                                                                                                                                                                                                                                                                                                                                                                                                                                                                                                                                                                                                                            |
|                                                                                                                                                                                                                                                                                                                                                                                                                                                                                                                                                                                                                                                                                                                                                                                                                                                                                                                                                      |           |                                                                                                                             | Joseph Fauver, Mallery Breban, Isabell Ott, Tara Alpert, Mary Petrone, Anderson Brito, Chantal Vogels, Annie Watkins, Chaney Kalinich, Jessica Rothman, Marie L. Landry, Nathan Grubaugh                                                                                                                                                                                                                                                                                                                                                                                                                                                                                                                                                                                                                                                                                                               |
| EPI_ISL_1293015, EPI_ISL_1293043                                                                                                                                                                                                                                                                                                                                                                                                                                                                                                                                                                                                                                                                                                                                                                                                                                                                                                                     |           | MD Public Health Laboratory                                                                                                 | MD Public Health Laboratory                                                                                                                                                                                                                                                                                                                                                                                                                                                                                                                                                                                                                                                                                                                                                                                                                                                                            |
|                                                                                                                                                                                                                                                                                                                                                                                                                                                                                                                                                                                                                                                                                                                                                                                                                                                                                                                                                      |           |                                                                                                                             | Maryland Department of Health Laboratories Administration                                                                                                                                                                                                                                                                                                                                                                                                                                                                                                                                                                                                                                                                                                                                                                                                                                              |
| EPI_ISL_1293083, EPI_ISL_1293085, EPI_ISL_1293087, EPI_ISL_1293088                                                                                                                                                                                                                                                                                                                                                                                                                                                                                                                                                                                                                                                                                                                                                                                                                                                                                   |           | Tempus                                                                                                                      | Grubaugh Lab - Yale School of Public Health                                                                                                                                                                                                                                                                                                                                                                                                                                                                                                                                                                                                                                                                                                                                                                                                                                                            |
|                                                                                                                                                                                                                                                                                                                                                                                                                                                                                                                                                                                                                                                                                                                                                                                                                                                                                                                                                      |           |                                                                                                                             | Joseph Fauver, Mallery Breban, Isabell Ott, Tara Alpert, Mary Petrone, Anderson Brito, Chantal Vogels, Annie Watkins, Chaney Kalinich, Jessica Rothman, Matthew J. MacKay, Gaurav Khullar, Jessica Metti, Joel T. Dudley, Megan Nash, Nike Beaubier, Christopher E. Mason, Nathan Grubaugh                                                                                                                                                                                                                                                                                                                                                                                                                                                                                                                                                                                                             |
| EPI_ISL_1293089, EPI_ISL_1293090, EPI_ISL_1293091, EPI_ISL_1293092                                                                                                                                                                                                                                                                                                                                                                                                                                                                                                                                                                                                                                                                                                                                                                                                                                                                                   |           | Yale Pathology Lab                                                                                                          | Grubaugh Lab - Yale School of Public Health                                                                                                                                                                                                                                                                                                                                                                                                                                                                                                                                                                                                                                                                                                                                                                                                                                                            |
|                                                                                                                                                                                                                                                                                                                                                                                                                                                                                                                                                                                                                                                                                                                                                                                                                                                                                                                                                      |           |                                                                                                                             | Joseph Fauver, Mallery Breban, Isabell Ott, Tara Alpert, Mary Petrone, Anderson Brito, Chantal Vogels, Annie Watkins, Chaney Kalinich, Jessica Rothman, Jianhui Wang, Chen Liu, Pei Hui, Nathan Grubaugh                                                                                                                                                                                                                                                                                                                                                                                                                                                                                                                                                                                                                                                                                               |
| EPI_ISL_1293093                                                                                                                                                                                                                                                                                                                                                                                                                                                                                                                                                                                                                                                                                                                                                                                                                                                                                                                                      |           | Oak Ridge                                                                                                                   | Grubaugh Lab - Yale School of Public Health                                                                                                                                                                                                                                                                                                                                                                                                                                                                                                                                                                                                                                                                                                                                                                                                                                                            |
|                                                                                                                                                                                                                                                                                                                                                                                                                                                                                                                                                                                                                                                                                                                                                                                                                                                                                                                                                      |           |                                                                                                                             | Joseph Fauver, Mallery Breban, Isabell Ott, Tara Alpert, Mary Petrone, Anderson Brito, Chantal Vogels, Annie Watkins, Chaney Kalinich, Jessica Rothman, Daniel Jones, Nathan Grubaugh                                                                                                                                                                                                                                                                                                                                                                                                                                                                                                                                                                                                                                                                                                                  |
| EPI_ISL_1293094, EPI_ISL_1293098, EPI_ISL_1293099, EPI_ISL_1293108, EPI_ISL_1293109, EPI_ISL_1293116, EPI_ISL_1293119, EPI_ISL_1293120, EPI_ISL_1293121, EPI_ISL_1293123                                                                                                                                                                                                                                                                                                                                                                                                                                                                                                                                                                                                                                                                                                                                                                             |           | Tempus                                                                                                                      | Grubaugh Lab - Yale School of Public Health                                                                                                                                                                                                                                                                                                                                                                                                                                                                                                                                                                                                                                                                                                                                                                                                                                                            |
|                                                                                                                                                                                                                                                                                                                                                                                                                                                                                                                                                                                                                                                                                                                                                                                                                                                                                                                                                      |           |                                                                                                                             | Joseph Fauver, Mallery Breban, Isabell Ott, Tara Alpert, Mary Petrone, Anderson Brito, Chantal Vogels, Annie Watkins, Chaney Kalinich, Jessica Rothman, Matthew J. MacKay, Gaurav Khullar, Jessica Metti, Joel T. Dudley, Megan Nash, Nike Beaubier, Christopher E. Mason, Nathan Grubaugh                                                                                                                                                                                                                                                                                                                                                                                                                                                                                                                                                                                                             |
| EPI_ISL_1293134                                                                                                                                                                                                                                                                                                                                                                                                                                                                                                                                                                                                                                                                                                                                                                                                                                                                                                                                      |           | Murphy Medical Association                                                                                                  | Grubaugh Lab - Yale School of Public Health                                                                                                                                                                                                                                                                                                                                                                                                                                                                                                                                                                                                                                                                                                                                                                                                                                                            |
|                                                                                                                                                                                                                                                                                                                                                                                                                                                                                                                                                                                                                                                                                                                                                                                                                                                                                                                                                      |           |                                                                                                                             | Joseph Fauver, Mallery Breban, Isabell Ott, Tara Alpert, Mary Petrone, Anderson Brito, Chantal Vogels, Annie Watkins, Chaney Kalinich, Jessica Rothman, Caleb Neal, Eva Laszlo, Steven Murphy, Nathan Grubaugh                                                                                                                                                                                                                                                                                                                                                                                                                                                                                                                                                                                                                                                                                         |
| EPI_ISL_1293144, EPI_ISL_1293145, EPI_ISL_1293146, EPI_ISL_1293147, EPI_ISL_1293148                                                                                                                                                                                                                                                                                                                                                                                                                                                                                                                                                                                                                                                                                                                                                                                                                                                                  |           | Yale Pathology Lab                                                                                                          | Grubaugh Lab - Yale School of Public Health                                                                                                                                                                                                                                                                                                                                                                                                                                                                                                                                                                                                                                                                                                                                                                                                                                                            |
|                                                                                                                                                                                                                                                                                                                                                                                                                                                                                                                                                                                                                                                                                                                                                                                                                                                                                                                                                      |           |                                                                                                                             | Joseph Fauver, Mallery Breban, Isabell Ott, Tara Alpert, Mary Petrone, Anderson Brito, Chantal Vogels, Annie Watkins, Chaney Kalinich, Jessica Rothman, Jianhui Wang, Chen Liu, Pei Hui, Nathan Grubaugh                                                                                                                                                                                                                                                                                                                                                                                                                                                                                                                                                                                                                                                                                               |
| EPI_ISL_1293149, EPI_ISL_1293150, EPI_ISL_1293152, EPI_ISL_1293153, EPI_ISL_1293154, EPI_ISL_1293155, EPI_ISL_1293156, EPI_ISL_1293157, EPI_ISL_1293158, EPI_ISL_1293159, EPI_ISL_1293161, EPI_ISL_1293162, EPI_ISL_1293163, EPI_ISL_1293164, EPI_ISL_1293165, EPI_ISL_1293166, EPI_ISL_1293167, EPI_ISL_1293168, EPI_ISL_1293169, EPI_ISL_1293170, EPI_ISL_1293171, EPI_ISL_1293172, EPI_ISL_1293173, EPI_ISL_1293174, EPI_ISL_1293175, EPI_ISL_1293176, EPI_ISL_1293177, EPI_ISL_1293179, EPI_ISL_1293180, EPI_ISL_1293181, EPI_ISL_1293182, EPI_ISL_1293183, EPI_ISL_1293184, EPI_ISL_1293185, EPI_ISL_1293186, EPI_ISL_1293187, EPI_ISL_1293188, EPI_ISL_1293189, EPI_ISL_1293190, EPI_ISL_1293191, EPI_ISL_1293192, EPI_ISL_1293193, EPI_ISL_1293194, EPI_ISL_1293195, EPI_ISL_1293196, EPI_ISL_1293197, EPI_ISL_1293198, EPI_ISL_1293199, EPI_ISL_1293200, EPI_ISL_1293201, EPI_ISL_1293206, EPI_ISL_1293207, EPI_ISL_1293208, EPI_ISL_1293212 | see above | Yale Clinical Virology Lab                                                                                                  | Grubaugh Lab - Yale School of Public Health                                                                                                                                                                                                                                                                                                                                                                                                                                                                                                                                                                                                                                                                                                                                                                                                                                                            |
|                                                                                                                                                                                                                                                                                                                                                                                                                                                                                                                                                                                                                                                                                                                                                                                                                                                                                                                                                      |           |                                                                                                                             | Joseph Fauver, Mallery Breban, Isabell Ott, Tara Alpert, Mary Petrone, Anderson Brito, Chantal Vogels, Annie Watkins, Chaney Kalinich, Jessica Rothman, Marie L. Landry, Nathan Grubaugh                                                                                                                                                                                                                                                                                                                                                                                                                                                                                                                                                                                                                                                                                                               |
| EPI_ISL_1293217                                                                                                                                                                                                                                                                                                                                                                                                                                                                                                                                                                                                                                                                                                                                                                                                                                                                                                                                      |           | Grubaugh Lab - Yale School of Public Health                                                                                 | Grubaugh Lab - Yale School of Public Health                                                                                                                                                                                                                                                                                                                                                                                                                                                                                                                                                                                                                                                                                                                                                                                                                                                            |
|                                                                                                                                                                                                                                                                                                                                                                                                                                                                                                                                                                                                                                                                                                                                                                                                                                                                                                                                                      |           |                                                                                                                             | Joseph Fauver, Mallery Breban, Isabell Ott, Tara Alpert, Mary Petrone, Anderson Brito, Chantal Vogels, Annie Watkins, Chaney Kalinich, Jessica Rothman, Nathan Grubaugh                                                                                                                                                                                                                                                                                                                                                                                                                                                                                                                                                                                                                                                                                                                                |
| EPI_ISL_1293219, EPI_ISL_1293220, EPI_ISL_1293221, EPI_ISL_1293222, EPI_ISL_1293223, EPI_ISL_1293224, EPI_ISL_1293225, EPI_ISL_1293226, EPI_ISL_1293227, EPI_ISL_1293228, EPI_ISL_1293229, EPI_ISL_1293230, EPI_ISL_1293231, EPI_ISL_1293232, EPI_ISL_1293233                                                                                                                                                                                                                                                                                                                                                                                                                                                                                                                                                                                                                                                                                        | see above | Yale Clinical Virology Lab                                                                                                  | Grubaugh Lab - Yale School of Public Health                                                                                                                                                                                                                                                                                                                                                                                                                                                                                                                                                                                                                                                                                                                                                                                                                                                            |
|                                                                                                                                                                                                                                                                                                                                                                                                                                                                                                                                                                                                                                                                                                                                                                                                                                                                                                                                                      |           |                                                                                                                             | Joseph Fauver, Mallery Breban, Isabell Ott, Tara Alpert, Mary Petrone, Anderson Brito, Chantal Vogels, Annie Watkins, Chaney Kalinich, Jessica Rothman, Marie L. Landry, Nathan Grubaugh                                                                                                                                                                                                                                                                                                                                                                                                                                                                                                                                                                                                                                                                                                               |
| EPI_ISL_1295169, EPI_ISL_1295172                                                                                                                                                                                                                                                                                                                                                                                                                                                                                                                                                                                                                                                                                                                                                                                                                                                                                                                     |           | Laboratory Diagnostics and Clinical Immunology of Developmental Age, Medical University of Warsaw                           | genXone SA, Research & Development Laboratory; The Faculty of Mathematics, Informatics and Mechanics of the University of Warsaw                                                                                                                                                                                                                                                                                                                                                                                                                                                                                                                                                                                                                                                                                                                                                                       |
|                                                                                                                                                                                                                                                                                                                                                                                                                                                                                                                                                                                                                                                                                                                                                                                                                                                                                                                                                      |           |                                                                                                                             | Maciej Sykulski, Grzegorz Nowicki, Jakub Grabowski, Natalia Drweska-Matelska, Anna Brylak-Blaszkow, Aleksandra Gidlewicz, Karol Szeszkow, Lukasz Krych, Michal Kaszuba, Anna Gambin, Urszula Demkow                                                                                                                                                                                                                                                                                                                                                                                                                                                                                                                                                                                                                                                                                                    |
| EPI_ISL_1295252                                                                                                                                                                                                                                                                                                                                                                                                                                                                                                                                                                                                                                                                                                                                                                                                                                                                                                                                      |           | Wisconsin State Laboratory of Hygiene Communicable Disease Division                                                         | Wisconsin State Laboratory of Hygiene Communicable Disease Division                                                                                                                                                                                                                                                                                                                                                                                                                                                                                                                                                                                                                                                                                                                                                                                                                                    |
|                                                                                                                                                                                                                                                                                                                                                                                                                                                                                                                                                                                                                                                                                                                                                                                                                                                                                                                                                      |           |                                                                                                                             | Kelsey R. Florek, Abigail C. Shockey                                                                                                                                                                                                                                                                                                                                                                                                                                                                                                                                                                                                                                                                                                                                                                                                                                                                   |
| EPI_ISL_1295640                                                                                                                                                                                                                                                                                                                                                                                                                                                                                                                                                                                                                                                                                                                                                                                                                                                                                                                                      |           | Ohio Department of Health Laboratory                                                                                        | Ohio Department of Health Laboratory                                                                                                                                                                                                                                                                                                                                                                                                                                                                                                                                                                                                                                                                                                                                                                                                                                                                   |
|                                                                                                                                                                                                                                                                                                                                                                                                                                                                                                                                                                                                                                                                                                                                                                                                                                                                                                                                                      |           |                                                                                                                             | Holmes, Jennifer; Eric Brandt, Keoni Omura, Glen McGillivray, Caitlin McDonnell, Jade Mowery, Stephanie Mccracken, Tyler Payne, Kirtana Ramadugu, Erica Leasure, Brent Lee, Kelsey Florek, Heather Blankenship, Allison Black, Quanta Brown, and Tammy Bannerman                                                                                                                                                                                                                                                                                                                                                                                                                                                                                                                                                                                                                                       |
| EPI_ISL_1295643                                                                                                                                                                                                                                                                                                                                                                                                                                                                                                                                                                                                                                                                                                                                                                                                                                                                                                                                      |           | Laboratory for Respiratory Viruses, Cantacuzino National Military-Medical Institute for Research and Development            | Cantacuzino Institute Virology                                                                                                                                                                                                                                                                                                                                                                                                                                                                                                                                                                                                                                                                                                                                                                                                                                                                         |
|                                                                                                                                                                                                                                                                                                                                                                                                                                                                                                                                                                                                                                                                                                                                                                                                                                                                                                                                                      |           |                                                                                                                             | Luiza Ustea, Nicoleta Paraschiv, Catalina Pascu, Mihaela Lazar                                                                                                                                                                                                                                                                                                                                                                                                                                                                                                                                                                                                                                                                                                                                                                                                                                         |
| EPI_ISL_1295674, EPI_ISL_1295792                                                                                                                                                                                                                                                                                                                                                                                                                                                                                                                                                                                                                                                                                                                                                                                                                                                                                                                     |           | Sharp HealthCare Laboratory                                                                                                 | Andersen lab at Scripps Research                                                                                                                                                                                                                                                                                                                                                                                                                                                                                                                                                                                                                                                                                                                                                                                                                                                                       |
|                                                                                                                                                                                                                                                                                                                                                                                                                                                                                                                                                                                                                                                                                                                                                                                                                                                                                                                                                      |           |                                                                                                                             | SEARCH Alliance San Diego with Aaron Harding, Jacquelyn Berumen, Cathy Woerle, Liam McGinnis, Art Mendoza, Omid Bakhtar                                                                                                                                                                                                                                                                                                                                                                                                                                                                                                                                                                                                                                                                                                                                                                                |
| EPI_ISL_1295816                                                                                                                                                                                                                                                                                                                                                                                                                                                                                                                                                                                                                                                                                                                                                                                                                                                                                                                                      |           | San Diego County Public Health Laboratory                                                                                   | Andersen lab at Scripps Research                                                                                                                                                                                                                                                                                                                                                                                                                                                                                                                                                                                                                                                                                                                                                                                                                                                                       |
|                                                                                                                                                                                                                                                                                                                                                                                                                                                                                                                                                                                                                                                                                                                                                                                                                                                                                                                                                      |           |                                                                                                                             | SEARCH Alliance San Diego with Tracy Basler, John Shephard, Brett Austin                                                                                                                                                                                                                                                                                                                                                                                                                                                                                                                                                                                                                                                                                                                                                                                                                               |
| EPI_ISL_1296187, EPI_ISL_1296190                                                                                                                                                                                                                                                                                                                                                                                                                                                                                                                                                                                                                                                                                                                                                                                                                                                                                                                     |           | University Hospitals of Geneva, Laboratory of Virology                                                                      | HUG, Laboratory of Virology and the Health2030 Genome Center                                                                                                                                                                                                                                                                                                                                                                                                                                                                                                                                                                                                                                                                                                                                                                                                                                           |
|                                                                                                                                                                                                                                                                                                                                                                                                                                                                                                                                                                                                                                                                                                                                                                                                                                                                                                                                                      |           |                                                                                                                             | Samuel Cordey, Ana Rita Goncalves, Laurent Kaiser, Lorenzo Cerutti, Henri Pegeot, Melyssa Elies, Deborah Penet, Keith Harshman, Ioannis Xenarios, Emmanouil Dermitzakis                                                                                                                                                                                                                                                                                                                                                                                                                                                                                                                                                                                                                                                                                                                                |
| EPI_ISL_1297220, EPI_ISL_1297232, EPI_ISL_1297235, EPI_ISL_1297245, EPI_ISL_1297273, EPI_ISL_1297279                                                                                                                                                                                                                                                                                                                                                                                                                                                                                                                                                                                                                                                                                                                                                                                                                                                 |           | BIOMNIS PARIS                                                                                                               | CNR Virus des Infections Respiratoires - France SUD                                                                                                                                                                                                                                                                                                                                                                                                                                                                                                                                                                                                                                                                                                                                                                                                                                                    |
|                                                                                                                                                                                                                                                                                                                                                                                                                                                                                                                                                                                                                                                                                                                                                                                                                                                                                                                                                      |           |                                                                                                                             | Antonin Bal, Gregory Destras, Gwendolyne Burfin, Hadrien Regue, Quentin Semanas, Martine Valette, Bruno Lina, Laurence Josset                                                                                                                                                                                                                                                                                                                                                                                                                                                                                                                                                                                                                                                                                                                                                                          |

|                                                                                                                                                                                                                                                                                                                  |                                                                                                           |                                                                                                                                   |                                                                                                                                                                                                                                                                                                                                                                                                                                                                                                                                                                                                                                                                                                                                                                                                                                                                                                         |
|------------------------------------------------------------------------------------------------------------------------------------------------------------------------------------------------------------------------------------------------------------------------------------------------------------------|-----------------------------------------------------------------------------------------------------------|-----------------------------------------------------------------------------------------------------------------------------------|---------------------------------------------------------------------------------------------------------------------------------------------------------------------------------------------------------------------------------------------------------------------------------------------------------------------------------------------------------------------------------------------------------------------------------------------------------------------------------------------------------------------------------------------------------------------------------------------------------------------------------------------------------------------------------------------------------------------------------------------------------------------------------------------------------------------------------------------------------------------------------------------------------|
| EPI_ISL_1297338, EPI_ISL_1297357                                                                                                                                                                                                                                                                                 | BIOMNIS LYON                                                                                              | CNR Virus des Infections Respiratoires - France SUD                                                                               | Antonin Bal, Gregory Destras, Gwendolynne Burfin, Hadrien Regue, Quentin Semanas, Martine Valette, Bruno Lina, Laurence Josset                                                                                                                                                                                                                                                                                                                                                                                                                                                                                                                                                                                                                                                                                                                                                                          |
| EPI_ISL_1297388, EPI_ISL_1297407                                                                                                                                                                                                                                                                                 | BIOMNIS PARIS                                                                                             | CNR Virus des Infections Respiratoires - France SUD                                                                               | Antonin Bal, Gregory Destras, Gwendolynne Burfin, Hadrien Regue, Quentin Semanas, Martine Valette, Bruno Lina, Laurence Josset                                                                                                                                                                                                                                                                                                                                                                                                                                                                                                                                                                                                                                                                                                                                                                          |
| EPI_ISL_1297439, EPI_ISL_1297441                                                                                                                                                                                                                                                                                 | BIOMNIS LYON                                                                                              | CNR Virus des Infections Respiratoires - France SUD                                                                               | Antonin Bal, Gregory Destras, Gwendolynne Burfin, Hadrien Regue, Quentin Semanas, Martine Valette, Bruno Lina, Laurence Josset                                                                                                                                                                                                                                                                                                                                                                                                                                                                                                                                                                                                                                                                                                                                                                          |
| EPI_ISL_1297454                                                                                                                                                                                                                                                                                                  | CNR Virus des Infections Respiratoires - France SUD                                                       | CNR Virus des Infections Respiratoires - France SUD                                                                               | Antonin Bal, Gregory Destras, Gwendolynne Burfin, Hadrien Regue, Quentin Semanas, Martine Valette, Bruno Lina, Laurence Josset                                                                                                                                                                                                                                                                                                                                                                                                                                                                                                                                                                                                                                                                                                                                                                          |
| EPI_ISL_1297829                                                                                                                                                                                                                                                                                                  | Arcispedale Santa Maria Nuova, Autoimmunità, Allergologia e Biotecnologie Innovative                      | Istituto Zooprofilattico Sperimentale della Lombardia e dell'Emilia Romagna (IZSLER), Risk Analysis and Genomic Epidemiology Unit | Alessandro Zerbini, Lucia Belloni, Stefania Croci, Marina Morganti, Ilaria Menozzi, Erika Scaltriti, Stefano Pongolini                                                                                                                                                                                                                                                                                                                                                                                                                                                                                                                                                                                                                                                                                                                                                                                  |
| EPI_ISL_1298204, EPI_ISL_1298219                                                                                                                                                                                                                                                                                 | Helix/Illumina                                                                                            | Centers for Disease Control and Prevention Division of Viral Diseases, Pathogen Discovery                                         | Peter W. Cook, Dakota Howard, Dhvani Batra, Ben L. Rambo-Martin, Eileen de Feo, Jan Antico, Christine Tran, Matthew Tolentino, Shannon Wickline, Kim Gietzen, Brad Sickler, Jingtao Liu, Eric Allen, Phil Febbo, Summer Galloway, Nicole L. Washington, Simon White, Geraint Levan, Kelly Schiabor Barrett, Elizabeth Cirulli, Alexandre Bolze, Ary Ascencio, Charlotte Rivera-Garcia, Ryan Cho, Jason Nguyen, Sherry Wang, Jimmy Ramirez, Tyler Cassens, Efen Sandoval, Magnus Isaksson, William Lee, David Becker, Marc Laurent, James Lu, Clinton R. Paden, Suxiang Tong, Duncan MacCannell                                                                                                                                                                                                                                                                                                          |
| EPI_ISL_1298227, EPI_ISL_1298230, EPI_ISL_1298232                                                                                                                                                                                                                                                                | Quest Diagnostics Incorporated                                                                            | Centers for Disease Control and Prevention Division of Viral Diseases, Pathogen Discovery                                         | Peter W. Cook, Dakota Howard, Dhvani Batra, Ben L. Rambo-Martin, S. H. Rosenthal, A. Gerasimova, R. M. Kagan, B. Anderson, M. Hua, Y. Liu, L.E. Bernstein, K.E. Livingston, A. Perez, I. A. Shlyakhter, R. V. Rolando, R. Owen, P. Tanpaiboon, F. Lacbawan, Clinton R. Paden, Suxiang Tong, Duncan MacCannell                                                                                                                                                                                                                                                                                                                                                                                                                                                                                                                                                                                           |
| EPI_ISL_1298249, EPI_ISL_1298255, EPI_ISL_1298258, EPI_ISL_1298260, EPI_ISL_1298262, EPI_ISL_1298266, EPI_ISL_1298269, EPI_ISL_1298272, EPI_ISL_1298280, EPI_ISL_1298326, EPI_ISL_1298330, EPI_ISL_1298332, EPI_ISL_1298361, EPI_ISL_1298365, EPI_ISL_1298380, EPI_ISL_1298382, EPI_ISL_1298407, EPI_ISL_1298408 | Laboratory Corporation of America                                                                         | Centers for Disease Control and Prevention Division of Viral Diseases, Pathogen Discovery                                         | Peter W. Cook, Dakota Howard, Dhvani Batra, Ben L. Rambo-Martin, Minoo Agarwal, Eyad Almasri, Debbie Boles, Ayla Burns, Nuthawin Charoensri, Oren Cohen, Susan Countryman, Mary Ann Cristobal, Bobbi Croy, Suzanne Dale, Hrushikesh Deshmukh, Amanda Douglas, Vincent Drouillon, Marcia Eisenberg, Howard Engler, Rama Ghatti, Prashant Gupta, Susan Hicks, Jake Humphrey, Lax Iyer, Manoj Jain, Mohan Kolli, Brian Krueger, Tim Kuphal, Stanley Letovsky, Michael Levandoski, Craig Lukasik, Jonathan Meltzer, Brian Norvell, Mindy Nye, Scott Parker, Christos Petropoulos, John Pruitt, Steven Ragan, Scott Ryan, Mike Sapeta, Jana Schroth, Suresh Babu Selvaraju, Goran Stevovic, Amanda Suchanek, Andrea Throop, Lyndon Tilson, Thomas Urban, Joe Voshell, Kimberly Wagner, Jonathan Williams, Mary Williamson, Qian Zeng, Tricia Zwiefelhofer, Clinton R. Paden, Suxiang Tong, Duncan MacCannell |
| EPI_ISL_1298474                                                                                                                                                                                                                                                                                                  | Burshtyn CCH                                                                                              | The Institute of Molecular Biology and Genetics of NASU                                                                           | M.Tukalo et al.                                                                                                                                                                                                                                                                                                                                                                                                                                                                                                                                                                                                                                                                                                                                                                                                                                                                                         |
| EPI_ISL_1298483                                                                                                                                                                                                                                                                                                  | Bogorodchany CRH                                                                                          | The Institute of Molecular Biology and Genetics of NASU                                                                           | M.Tukalo et al.                                                                                                                                                                                                                                                                                                                                                                                                                                                                                                                                                                                                                                                                                                                                                                                                                                                                                         |
| EPI_ISL_1298484                                                                                                                                                                                                                                                                                                  | Nadvirna CRH                                                                                              | The Institute of Molecular Biology and Genetics of NASU                                                                           | M.Tukalo et al.                                                                                                                                                                                                                                                                                                                                                                                                                                                                                                                                                                                                                                                                                                                                                                                                                                                                                         |
| EPI_ISL_1298486                                                                                                                                                                                                                                                                                                  | Kosov CRH                                                                                                 | The Institute of Molecular Biology and Genetics of NASU                                                                           | M.Tukalo et al.                                                                                                                                                                                                                                                                                                                                                                                                                                                                                                                                                                                                                                                                                                                                                                                                                                                                                         |
| EPI_ISL_1298487                                                                                                                                                                                                                                                                                                  | Kalush CRH                                                                                                | The Institute of Molecular Biology and Genetics of NASU                                                                           | M.Tukalo et al.                                                                                                                                                                                                                                                                                                                                                                                                                                                                                                                                                                                                                                                                                                                                                                                                                                                                                         |
| EPI_ISL_1298845, EPI_ISL_1298849, EPI_ISL_1298866                                                                                                                                                                                                                                                                | ASL Napoli 1 Centro                                                                                       | AMES Centro Poldiagnostico Strumentale S.r.l.                                                                                     | "Giovanni Savarese, Raffaella Ruggiero, Eloisa Evangelista, Antonella Di Carlo, Luisa Circelli, Luigi D'Amore, Nadia Petrillo, Monica Ianniello, Roberto Sirica, Maurizio D'Amora, Antonio Fico"                                                                                                                                                                                                                                                                                                                                                                                                                                                                                                                                                                                                                                                                                                        |
| EPI_ISL_1299226                                                                                                                                                                                                                                                                                                  | Kansas Health and Environmental Lab                                                                       | Kansas Health and Environmental Lab                                                                                               | Mike Grose, Jonathan Barnell, Ben Olsen, and Phil Adam                                                                                                                                                                                                                                                                                                                                                                                                                                                                                                                                                                                                                                                                                                                                                                                                                                                  |
| EPI_ISL_1299236                                                                                                                                                                                                                                                                                                  | OLVZ Aalst                                                                                                | OLVZ Aalst                                                                                                                        | Astrid Holderbeke                                                                                                                                                                                                                                                                                                                                                                                                                                                                                                                                                                                                                                                                                                                                                                                                                                                                                       |
| EPI_ISL_1299520, EPI_ISL_1299563                                                                                                                                                                                                                                                                                 | Azienda Ospedaliera Terni                                                                                 | Istituto Zooprofilattico Sperimentale dell'Abruzzo e Molise "G. Caporale"                                                         | Palumbo m, Scaccetti A, Lorusso A, Marcacci M, Di Domenico M, Ancora M, Curini V, Mangone I, Rinaldi A, Scialabba S, Di Pasquale A, Cammà C, Puglia I, Calistri P, Savini G                                                                                                                                                                                                                                                                                                                                                                                                                                                                                                                                                                                                                                                                                                                             |
| EPI_ISL_1299567                                                                                                                                                                                                                                                                                                  | Università degli Studi di Perugia                                                                         | Istituto Zooprofilattico Sperimentale dell'Abruzzo e Molise "G. Caporale"                                                         | Mencacci A, Camilloni B,Lorusso A, Marcacci M, Di Domenico M, Ancora M, Curini V, Mangone I, Rinaldi A, Scialabba S, Di Pasquale A, Cammà C, Puglia I, Calistri P, Savini G                                                                                                                                                                                                                                                                                                                                                                                                                                                                                                                                                                                                                                                                                                                             |
| EPI_ISL_1299857, EPI_ISL_1299863, EPI_ISL_1299865, EPI_ISL_1299866, EPI_ISL_1299872, EPI_ISL_1299876, EPI_ISL_1299881, EPI_ISL_1299882                                                                                                                                                                           | Unit of lab surveillance of viral emerging diseases, National Lab of Influenza                            | Respiratory Virus Unit, National Infection Service, Public Health England                                                         | PHE Covid Sequencing Team, Iris Hasibra, Prof Silvia Bino, Prof Albana Fico                                                                                                                                                                                                                                                                                                                                                                                                                                                                                                                                                                                                                                                                                                                                                                                                                             |
| EPI_ISL_1300013                                                                                                                                                                                                                                                                                                  | OKMI FN Brno                                                                                              | CEITEC MU                                                                                                                         | Zdravilova Dubska L., Dolejska M., Pardy F., Machackova T., Bystry V., Deissova T.                                                                                                                                                                                                                                                                                                                                                                                                                                                                                                                                                                                                                                                                                                                                                                                                                      |
| EPI_ISL_1300177, EPI_ISL_1300189, EPI_ISL_1300190, EPI_ISL_1300192, EPI_ISL_1300193, EPI_ISL_1300210, EPI_ISL_1300229, EPI_ISL_1300255, EPI_ISL_1300258                                                                                                                                                          | NYU Langone Health                                                                                        | Departments of Pathology and Medicine, New York University School of Medicine                                                     | Adriana Heguy, Dacia Dimartino, Emily Guzman, Christian Marier, Peter Meyn, Sitharam Ramaswami, Gael Westby, Paul Zappile, Yutong Zhang, Paolo Cotzia, Guiqing Wang                                                                                                                                                                                                                                                                                                                                                                                                                                                                                                                                                                                                                                                                                                                                     |
| EPI_ISL_1300362, EPI_ISL_1300398                                                                                                                                                                                                                                                                                 | Texas Department of State Health Services - TXDSHS                                                        | Texas Department of State Health Services - TXDSHS                                                                                | Rashmi Tuladhar, Bonnie Oh, Jenny Zhang, Maliha Rahman, Mayela Pedrueza, Anita Pokharel, Myong Koag, Chun Wang, Rachel Lee, Grace Kubin                                                                                                                                                                                                                                                                                                                                                                                                                                                                                                                                                                                                                                                                                                                                                                 |
| EPI_ISL_1300538, EPI_ISL_1300539                                                                                                                                                                                                                                                                                 | Arizona State University                                                                                  | Arizona State University                                                                                                          | Rabia Maqsood, LaRinda A. Holland, Peter T. Skidmore, Emily A. Kaelin, Nicholas J. Mellor, Kristina Buss, Joy M. Blain, Neal W Woodbury, Valerie Harris, Joshua LaBaer, Vel Murugan, Efrem S. Lim                                                                                                                                                                                                                                                                                                                                                                                                                                                                                                                                                                                                                                                                                                       |
| EPI_ISL_1300733, EPI_ISL_1300745                                                                                                                                                                                                                                                                                 | Wojewodzka Stacja Sanitarno-Epidemiologiczna w Olsztynie, Laboratorium Badan Epidemiologiczno-Klinicznych | Wojewodzka Stacja Sanitarno-Epidemiologiczna w Olsztynie, Laboratorium Badan Epidemiologiczno-Klinicznych                         | Sylvia Krzetowska, Monika Czerminska, Ewa Liszewska, Tomasz Jakubczak, Marta Lukian, Patryk Bielecki, Aleksandra Kobiatko, Emilia Tarabasz, Paulina Rozycza, Barbara Dolinska                                                                                                                                                                                                                                                                                                                                                                                                                                                                                                                                                                                                                                                                                                                           |
| EPI_ISL_1300804, EPI_ISL_1300807, EPI_ISL_1300810, EPI_ISL_1300811                                                                                                                                                                                                                                               | MSHS Clinical Microbiology Laboratories                                                                   | MSHS Pathogen Surveillance Program                                                                                                | Ana S. Gonzalez-Reiche, Hala Alshammry, Mitchell J. Sullivan, Brianne Ciferri, Ajay Obla, Angela Amoako, Mahmoud Awawda, Daniel Floda, Julia Matthews, Ashley Salimbangon, Levy Sominsky, Katherine Beach, Kayla Russo, Charles Gleason, Shelcie Fabre, Giulio Kleiner, Zenab Khan, Bremy Alburquerque, Adriana van de Guchte, Komal Srivastava, Matthew M. Hernandez, Jayeeta Dutta, Denise Jurczynszak, Nancy Francoeur, Betsaida Salom Melo, Irina Oussenko, Gintaras Deikus, Juan Soto, Shwetha Hara Sridhar, Ying-Chih Wang, Kathryn Twyman, Deena R. Altman, Robert Sebra, Adolfo Garcia-Sastre, Marta Luksza, Gopi Patel, Sarah Schaefer, Melissa Gitman, Michael D. Nowak, Alberto Paniz-Mondolfi, Emilia Mia Sordillo, Viviana Simon, Harm van Bakel                                                                                                                                           |
| EPI_ISL_1301743, EPI_ISL_1301744                                                                                                                                                                                                                                                                                 | Nucleic Acid Testing, National Reference Laboratory                                                       | GIGA Medical Genomics                                                                                                             | Yvan Butera, Keith Durkin, Maria Artesi, Bouchra Boujemla, Robert Rutayisire, Patrick Tuyisenge, Esperence Umumararungu, Sébastien Bontems, Marie-Pierre Hayette, Nathalie Renotte, Swaibu Gatare, Jacob Souopgui, Sabin Nsanzimana, Vincent Bours, Léon Mutesa                                                                                                                                                                                                                                                                                                                                                                                                                                                                                                                                                                                                                                         |
| EPI_ISL_1301809                                                                                                                                                                                                                                                                                                  | Hopital                                                                                                   | National Reference Center for Viruses of Respiratory Infections, Institut Pasteur, Paris                                          | Marion Barbet, Sylvie Behillil, Méline Bizard, Angela Brisebarre, Camille Capel, Louise Lefrançois, Etienne Simon-Lorière, Vincent Enouf, Maud Vanpeene, Sylvie van der Werf,Ramanantsoa CêLine                                                                                                                                                                                                                                                                                                                                                                                                                                                                                                                                                                                                                                                                                                         |
| EPI_ISL_1301841                                                                                                                                                                                                                                                                                                  | Hopital                                                                                                   | National Reference Center for Viruses of Respiratory Infections, Institut Pasteur, Paris                                          | Marion Barbet, Sylvie Behillil, Méline Bizard, Angela Brisebarre, Camille Capel, Louise Lefrançois, Etienne Simon-Lorière, Vincent Enouf, Maud Vanpeene, Sylvie van der Werf,Guinoiseau Thibault                                                                                                                                                                                                                                                                                                                                                                                                                                                                                                                                                                                                                                                                                                        |
| EPI_ISL_1301846                                                                                                                                                                                                                                                                                                  | Hopital                                                                                                   | National Reference Center for Viruses of Respiratory Infections, Institut Pasteur, Paris                                          | Marion Barbet, Sylvie Behillil, Méline Bizard, Angela Brisebarre, Camille Capel, Louise Lefrançois, Etienne Simon-Lorière, Vincent Enouf, Maud Vanpeene, Sylvie van der Werf,Coste-Burel Marianne                                                                                                                                                                                                                                                                                                                                                                                                                                                                                                                                                                                                                                                                                                       |
| EPI_ISL_1301849                                                                                                                                                                                                                                                                                                  | Hopital                                                                                                   | National Reference Center for Viruses of Respiratory Infections, Institut Pasteur, Paris                                          | Marion Barbet, Sylvie Behillil, Méline Bizard, Angela Brisebarre, Camille Capel, Louise Lefrançois, Etienne Simon-Lorière, Vincent Enouf, Maud Vanpeene, Sylvie van der Werf,Leruez-Ville Marianne                                                                                                                                                                                                                                                                                                                                                                                                                                                                                                                                                                                                                                                                                                      |
| EPI_ISL_1301853                                                                                                                                                                                                                                                                                                  | Hopital                                                                                                   | National Reference Center for Viruses of Respiratory Infections, Institut Pasteur, Paris                                          | Marion Barbet, Sylvie Behillil, Méline Bizard, Angela Brisebarre, Camille Capel, Louise Lefrançois, Etienne Simon-Lorière, Vincent Enouf, Maud Vanpeene, Sylvie van der Werf,Griscelli Franck                                                                                                                                                                                                                                                                                                                                                                                                                                                                                                                                                                                                                                                                                                           |
| EPI_ISL_1301866, EPI_ISL_1301872                                                                                                                                                                                                                                                                                 | hopital                                                                                                   | National Reference Center for Viruses of Respiratory Infections, Institut Pasteur, Paris                                          | Marion Barbet, Sylvie Behillil, Méline Bizard, Angela Brisebarre, Camille Capel, Louise Lefrançois, Etienne Simon-Lorière, Vincent Enouf, Maud Vanpeene, Sylvie van der Werf,Guigon AuréLie                                                                                                                                                                                                                                                                                                                                                                                                                                                                                                                                                                                                                                                                                                             |



|                                                                                                                                                                                                                                                                                                                                                                                                                                                                                                                                                                                                                                                                                                                                                                                                                                                                                                                                                                                                         |                                                                                                                                                                                                                     |                                                                                          |                                                                                                                                                                                                                                                                                                                                                                                                                                                           |                                                                                                                                                                      |
|---------------------------------------------------------------------------------------------------------------------------------------------------------------------------------------------------------------------------------------------------------------------------------------------------------------------------------------------------------------------------------------------------------------------------------------------------------------------------------------------------------------------------------------------------------------------------------------------------------------------------------------------------------------------------------------------------------------------------------------------------------------------------------------------------------------------------------------------------------------------------------------------------------------------------------------------------------------------------------------------------------|---------------------------------------------------------------------------------------------------------------------------------------------------------------------------------------------------------------------|------------------------------------------------------------------------------------------|-----------------------------------------------------------------------------------------------------------------------------------------------------------------------------------------------------------------------------------------------------------------------------------------------------------------------------------------------------------------------------------------------------------------------------------------------------------|----------------------------------------------------------------------------------------------------------------------------------------------------------------------|
| EPI_ISL_1301879                                                                                                                                                                                                                                                                                                                                                                                                                                                                                                                                                                                                                                                                                                                                                                                                                                                                                                                                                                                         | Armies                                                                                                                                                                                                              | National Reference Center for Viruses of Respiratory Infections, Institut Pasteur, Paris | Marion Barbet, Sylvie Behillil, Méline Bizard, Angela Brisebarre, Camille Capel, Louise Lefrançois, Etienne Simon-Lorière, Vincent Enouf, Maud Vanpeene, Sylvie van der Werf, Desroches Marine                                                                                                                                                                                                                                                            |                                                                                                                                                                      |
| EPI_ISL_1301981, EPI_ISL_1301983, EPI_ISL_1301984, EPI_ISL_1302019, EPI_ISL_1302027, EPI_ISL_1302033, EPI_ISL_1302036, EPI_ISL_1302048, EPI_ISL_1302057, EPI_ISL_1302070                                                                                                                                                                                                                                                                                                                                                                                                                                                                                                                                                                                                                                                                                                                                                                                                                                | National Center of Infectious and Parasitic Diseases                                                                                                                                                                | National Center of Infectious and Parasitic Diseases                                     | Alexiev et al                                                                                                                                                                                                                                                                                                                                                                                                                                             |                                                                                                                                                                      |
| EPI_ISL_1302694, EPI_ISL_1302696, EPI_ISL_1302700                                                                                                                                                                                                                                                                                                                                                                                                                                                                                                                                                                                                                                                                                                                                                                                                                                                                                                                                                       | Gravity Diagnostics                                                                                                                                                                                                 | Kentucky State Public Health Lab                                                         | Stephanie Lunn, Karim George, Joshua Tobias, William Grooms, Vaneet Arora, Matthew Johnson, Rachel Zinner, Rhonda Lucas                                                                                                                                                                                                                                                                                                                                   |                                                                                                                                                                      |
| EPI_ISL_1302720, EPI_ISL_1302724, EPI_ISL_1302725, EPI_ISL_1302726, EPI_ISL_1302739, EPI_ISL_1302741, EPI_ISL_1302755, EPI_ISL_1302769                                                                                                                                                                                                                                                                                                                                                                                                                                                                                                                                                                                                                                                                                                                                                                                                                                                                  | Ministry of Health Turkey                                                                                                                                                                                           | Ministry of Health Turkey                                                                | Fatma Bayraktar, Yasemin Cosgun, Suleyman Yalcin, Gulay Korukluoglu                                                                                                                                                                                                                                                                                                                                                                                       |                                                                                                                                                                      |
| EPI_ISL_1303094                                                                                                                                                                                                                                                                                                                                                                                                                                                                                                                                                                                                                                                                                                                                                                                                                                                                                                                                                                                         | Microbiology Division, South Carolina Department of Health and Environmental Control                                                                                                                                | Microbiology Division, South Carolina Department of Health and Environmental Control     | Flores,H., Freeman,J.                                                                                                                                                                                                                                                                                                                                                                                                                                     |                                                                                                                                                                      |
| EPI_ISL_1303477, EPI_ISL_1303479, EPI_ISL_1303485, EPI_ISL_1303488                                                                                                                                                                                                                                                                                                                                                                                                                                                                                                                                                                                                                                                                                                                                                                                                                                                                                                                                      | Flow Diagnostics Lab                                                                                                                                                                                                | Los Angeles County PHL                                                                   | P. Hemarajata et al.                                                                                                                                                                                                                                                                                                                                                                                                                                      |                                                                                                                                                                      |
| EPI_ISL_1303582, EPI_ISL_1303618, EPI_ISL_1303699, EPI_ISL_1303852, EPI_ISL_1304276, EPI_ISL_1305113, EPI_ISL_1305127, EPI_ISL_1305138, EPI_ISL_1305380, EPI_ISL_1305435, EPI_ISL_1305522, EPI_ISL_1305530, EPI_ISL_1305554, EPI_ISL_1305657, EPI_ISL_1305701                                                                                                                                                                                                                                                                                                                                                                                                                                                                                                                                                                                                                                                                                                                                           | see above                                                                                                                                                                                                           | Houston Methodist Hospital                                                               | S. Wesley Long, Randall J. Olsen, Paul A. Christensen, Sishir Subedi, Robert Olson, James J. Davis, Matthew Ojeda Saavedra, Prasanti Yerramilli, Layne Pruitt, Kristina Reppond, Madison N. Shyer, Jessica Cambric, Ilya J. Finkelstein, Jimmy Gollihar, and James M. Musser                                                                                                                                                                              |                                                                                                                                                                      |
| EPI_ISL_1306260, EPI_ISL_1306267, EPI_ISL_1306276, EPI_ISL_1306279, EPI_ISL_1306280, EPI_ISL_1306287, EPI_ISL_1306326, EPI_ISL_1306328, EPI_ISL_1306338, EPI_ISL_1306351, EPI_ISL_1306354, EPI_ISL_1306359, EPI_ISL_1306360, EPI_ISL_1306370, EPI_ISL_1306374, EPI_ISL_1306383, EPI_ISL_1306387, EPI_ISL_1306396, EPI_ISL_1306399, EPI_ISL_1306401, EPI_ISL_1306404, EPI_ISL_1306423, EPI_ISL_1306445, EPI_ISL_1306498, EPI_ISL_1306571, EPI_ISL_1306630, EPI_ISL_1306691, EPI_ISL_1306750, EPI_ISL_1306755, EPI_ISL_1306771, EPI_ISL_1306784, EPI_ISL_1306876, EPI_ISL_1306949, EPI_ISL_1306973, EPI_ISL_1306976, EPI_ISL_1307030, EPI_ISL_1307065, EPI_ISL_1307119, EPI_ISL_1307200, EPI_ISL_1307238, EPI_ISL_1307241, EPI_ISL_1307247, EPI_ISL_1307248, EPI_ISL_1307254, EPI_ISL_1307294, EPI_ISL_1307323, EPI_ISL_1307363, EPI_ISL_1307386, EPI_ISL_1307394, EPI_ISL_1307397, EPI_ISL_1307419, EPI_ISL_1307441, EPI_ISL_1307465, EPI_ISL_1307485, EPI_ISL_1307509, EPI_ISL_1307535, EPI_ISL_1307623 | see above                                                                                                                                                                                                           | Pandemic Response Lab - NYC                                                              | Pandemic Response Lab, R&D                                                                                                                                                                                                                                                                                                                                                                                                                                | Henry Lee, Michael Hammerling, Melissa Hopkins, Cybill del Castillo, Shinyoung Clair Kang, William Ward, Pradeep Bugga, Sol Rey, Dylan Law, Haiping Hao, Jon Laurent |
| EPI_ISL_1307734, EPI_ISL_1307767, EPI_ISL_1307796, EPI_ISL_1307866, EPI_ISL_1307867, EPI_ISL_1307872, EPI_ISL_1307883, EPI_ISL_1307923                                                                                                                                                                                                                                                                                                                                                                                                                                                                                                                                                                                                                                                                                                                                                                                                                                                                  | Istituto Zooprofilattico Sperimentale del Mezzogiorno                                                                                                                                                               | TIGEM                                                                                    | Antonio Grimaldi Patrizia Annunziata Francesco Panariello Biancamaria Pierri Claudia Tiberio Valentina Bouche Chiara Colantuono Maria Concetta Cuomo Denise Di Concilio Lucio Di Filippo Anna Manfredi Marcello Salvi Antonio Limone Luigi Atripaldi Pellegrino Cerino Andrea Ballabio Davide Cacchiarelli                                                                                                                                                |                                                                                                                                                                      |
| EPI_ISL_1307946                                                                                                                                                                                                                                                                                                                                                                                                                                                                                                                                                                                                                                                                                                                                                                                                                                                                                                                                                                                         | Lab. Microbiologia e Virologia Cotugno A.O. dei Colli                                                                                                                                                               | TIGEM                                                                                    | Antonio Grimaldi Patrizia Annunziata Francesco Panariello Biancamaria Pierri Claudia Tiberio Valentina Bouche Chiara Colantuono Maria Concetta Cuomo Denise Di Concilio Lucio Di Filippo Anna Manfredi Marcello Salvi Antonio Limone Luigi Atripaldi Pellegrino Cerino Andrea Ballabio Davide Cacchiarelli                                                                                                                                                |                                                                                                                                                                      |
| EPI_ISL_1308080                                                                                                                                                                                                                                                                                                                                                                                                                                                                                                                                                                                                                                                                                                                                                                                                                                                                                                                                                                                         | Quadram Institute Bioscience                                                                                                                                                                                        | COVID-19 Genomics UK (COG-UK) Consortium                                                 | Dave J. Baker, Gemma L. Kay, Alp Aydin, Thanh Le-Viet, Steven Rudder, Ana P. Tedim, Anastasia Kolyva, Maria Diaz, Leonardo de Oliveira Martins, Nabil-Fareed Alikhan, Lizzie Meadows, Rachael Stanley, Ngozi Elumogo, Muhammed Yasir, Nicholas M. Thomson, Alexander J Trotter, Rachel Gilroy, Samuel Bloomfield, Claire Stuart, Andrew Bell, Reenesh Prakash, Samir Dervisevic, Alison E. Mather, John Wain, Mark Webber, Andrew J. Page, Justin O'Grady |                                                                                                                                                                      |
| EPI_ISL_1308409                                                                                                                                                                                                                                                                                                                                                                                                                                                                                                                                                                                                                                                                                                                                                                                                                                                                                                                                                                                         | Northumbria University / South Tees Hospitals NHS Foundation Trust / North Cumbria Integrated Care NHS Foundation Trust / North Tees and Hartlepool NHS Foundation Trust / Newcastle Hospitals NHS Foundation Trust | COVID-19 Genomics UK (COG-UK) Consortium                                                 | Darren L Smith Andrew Nelson, Matthew Bashton, Greg R Young, Joshua Loh, John Allan, Mohammad A Tariq, Giles S Holt, Gary Black, Wen C Yew, Lynn Dover, Paul Baker, Steve Liggett, Sarah Essex, Jane Greenaway, Debra Padgett, Clive Graham, Garren Scott, Edward Barton, Emma Swindells, Brendan Payne, Jennifer Collins, Yusra Taha, Gary Eltringham                                                                                                    |                                                                                                                                                                      |
| EPI_ISL_1309883, EPI_ISL_1310269                                                                                                                                                                                                                                                                                                                                                                                                                                                                                                                                                                                                                                                                                                                                                                                                                                                                                                                                                                        | Originating lab: Wales Specialist Virology Centre Sequencing lab: Pathogen Genomics Unit                                                                                                                            | Public Health Wales Microbiology Cardiff Wales Specialist Virology Centre                | Catherine Moore, Johnathan Evans, Laura Gifford, Malorie Perry, Simon Cottrell, Angela Marchbank, Alec Birchley, Alexander Adams, Amy Gaskin, Bree Gatica-Wilcox, Jason Coombes, Joel Southgate, Lauren Gilbert, Lee Graham, Nicole Pacchiarini, Sara Kumziene-Summerhayes, Sarah Taylor, Sophie Jones, Sara Rey, Matthew Bull, Joanne Watkins, Sally Corden, Tom Connor                                                                                  |                                                                                                                                                                      |
| EPI_ISL_1310445                                                                                                                                                                                                                                                                                                                                                                                                                                                                                                                                                                                                                                                                                                                                                                                                                                                                                                                                                                                         | Centre for Enzyme Innovation, University of Portsmouth / Translational Research Laboratory, Portsmouth Hospitals NHS Trust                                                                                          | COVID-19 Genomics UK (COG-UK) Consortium                                                 | Angela Beckett, Salman Goudarzi, Christopher Fearn, Kate Cook, Katie Loveson, Sharon Glaysher, Scott Elliott, Samuel Robson                                                                                                                                                                                                                                                                                                                               |                                                                                                                                                                      |
| EPI_ISL_1310805, EPI_ISL_1310807                                                                                                                                                                                                                                                                                                                                                                                                                                                                                                                                                                                                                                                                                                                                                                                                                                                                                                                                                                        | Ohio Department of Health Laboratory                                                                                                                                                                                | Ohio Department of Health Laboratory                                                     | Holmes, Jennifer; Eric Brandt, Keoni Omura, Glen McGilivray, Caitlin McDonnell, Jade Mowery, Stephanie Mccracken, Tyler Payne, Kirtana Ramadugu, Erica Leasure, Brent Lee, Kelsey Florek, Heather Blankenship, Allison Black, Quanta Brown, and Tammy Bannerman                                                                                                                                                                                           |                                                                                                                                                                      |
| EPI_ISL_1310831                                                                                                                                                                                                                                                                                                                                                                                                                                                                                                                                                                                                                                                                                                                                                                                                                                                                                                                                                                                         | Institute of Virology, Biomedical Research Center of the Slovak Academy of Sciences, Bratislava                                                                                                                     | Faculty of Natural Sciences, Comenius University, Bratislava                             | Kristina Borsova, Viktoria Cabanova, Brona Brejova, Viktoria Hodorova, Sabina Fumacova Havlikova, Juraj Kopacek, Martina Lickova, Lubomira Lukacikova, Martina Nebohacova, Monika Slavikova, Tomas Vinar, Boris Klempa, Jozef Nosek                                                                                                                                                                                                                       |                                                                                                                                                                      |
| EPI_ISL_1311904, EPI_ISL_1311947                                                                                                                                                                                                                                                                                                                                                                                                                                                                                                                                                                                                                                                                                                                                                                                                                                                                                                                                                                        | Hospital General Universitario de Alicante - Instituto de Investigación Sanitaria y Biomédica de Alicante                                                                                                           | SeqCOVID-SPAIN consortium/IBV(CSIC)                                                      | Maripaz Ventero Martín, Carmen Molina Pardines and SeqCOVID-SPAIN consortium                                                                                                                                                                                                                                                                                                                                                                              |                                                                                                                                                                      |
| EPI_ISL_1312132                                                                                                                                                                                                                                                                                                                                                                                                                                                                                                                                                                                                                                                                                                                                                                                                                                                                                                                                                                                         | KU Leuven, Rega Institute, Clinical and Epidemiological Virology                                                                                                                                                    | KU Leuven, Rega Institute, Clinical and Epidemiological Virology                         | Tony Wawina-Bokalanga, Bert Vanmechelen, Joan Marti-Carerras, Piet Maes                                                                                                                                                                                                                                                                                                                                                                                   |                                                                                                                                                                      |
| EPI_ISL_1312357                                                                                                                                                                                                                                                                                                                                                                                                                                                                                                                                                                                                                                                                                                                                                                                                                                                                                                                                                                                         | Gravity Diagnostics                                                                                                                                                                                                 | Kentucky State Public Health Lab                                                         | Stephanie Lunn, Karim George, Joshua Tobias, William Grooms, Vaneet Arora, Matthew Johnson, Rachel Zinner, Rhonda Lucas                                                                                                                                                                                                                                                                                                                                   |                                                                                                                                                                      |
| EPI_ISL_1312790, EPI_ISL_1312793, EPI_ISL_1312794                                                                                                                                                                                                                                                                                                                                                                                                                                                                                                                                                                                                                                                                                                                                                                                                                                                                                                                                                       | Molecular & Genomic Pathology Laboratory, Thomas Jefferson University Hospital                                                                                                                                      | Molecular & Genomic Pathology Laboratory, Thomas Jefferson University Hospital           | Run Jin, Nitika Badjatia, Zi-xuan Wang                                                                                                                                                                                                                                                                                                                                                                                                                    |                                                                                                                                                                      |
| EPI_ISL_1312799                                                                                                                                                                                                                                                                                                                                                                                                                                                                                                                                                                                                                                                                                                                                                                                                                                                                                                                                                                                         | CH ALBI                                                                                                                                                                                                             | CNR Virus des Infections Respiratoires - France SUD                                      | Antonin Bal, Gregory Destras, Gwendolynne Burfin, Hadrien Regue, Quentin Semanas, Martine Valette, Bruno Lina, Laurence Josset                                                                                                                                                                                                                                                                                                                            |                                                                                                                                                                      |
| EPI_ISL_1312863, EPI_ISL_1312890                                                                                                                                                                                                                                                                                                                                                                                                                                                                                                                                                                                                                                                                                                                                                                                                                                                                                                                                                                        | NOVELAB                                                                                                                                                                                                             | CNR Virus des Infections Respiratoires - France SUD                                      | Antonin Bal, Gregory Destras, Gwendolynne Burfin, Hadrien Regue, Quentin Semanas, Martine Valette, Bruno Lina, Laurence Josset                                                                                                                                                                                                                                                                                                                            |                                                                                                                                                                      |
| EPI_ISL_1312956                                                                                                                                                                                                                                                                                                                                                                                                                                                                                                                                                                                                                                                                                                                                                                                                                                                                                                                                                                                         | CNR Virus des Infections Respiratoires - France SUD                                                                                                                                                                 | CNR Virus des Infections Respiratoires - France SUD                                      | Antonin Bal, Gregory Destras, Gwendolynne Burfin, Hadrien Regue, Quentin Semanas, Martine Valette, Bruno Lina, Laurence Josset                                                                                                                                                                                                                                                                                                                            |                                                                                                                                                                      |
| EPI_ISL_1312979                                                                                                                                                                                                                                                                                                                                                                                                                                                                                                                                                                                                                                                                                                                                                                                                                                                                                                                                                                                         | CHU NIMES                                                                                                                                                                                                           | CNR Virus des Infections Respiratoires - France SUD                                      | Antonin Bal, Gregory Destras, Gwendolynne Burfin, Hadrien Regue, Quentin Semanas, Martine Valette, Bruno Lina, Laurence Josset                                                                                                                                                                                                                                                                                                                            |                                                                                                                                                                      |
| EPI_ISL_1313091                                                                                                                                                                                                                                                                                                                                                                                                                                                                                                                                                                                                                                                                                                                                                                                                                                                                                                                                                                                         | LABORATOIRE ANABIO BERGSON                                                                                                                                                                                          | CNR Virus des Infections Respiratoires - France SUD                                      | Antonin Bal, Gregory Destras, Gwendolynne Burfin, Hadrien Regue, Quentin Semanas, Martine Valette, Bruno Lina, Laurence Josset                                                                                                                                                                                                                                                                                                                            |                                                                                                                                                                      |
| EPI_ISL_1313542                                                                                                                                                                                                                                                                                                                                                                                                                                                                                                                                                                                                                                                                                                                                                                                                                                                                                                                                                                                         | NJDOH, Public Health and Environmental Laboratories                                                                                                                                                                 | NJ_PHEL                                                                                  | Lindsey Bodnar, Shiv K. Verma, Dana Woell, Byeong Jeong                                                                                                                                                                                                                                                                                                                                                                                                   |                                                                                                                                                                      |
| EPI_ISL_1313593, EPI_ISL_1313597, EPI_ISL_1313964, EPI_ISL_1313981                                                                                                                                                                                                                                                                                                                                                                                                                                                                                                                                                                                                                                                                                                                                                                                                                                                                                                                                      | CNR Virus des Infections Respiratoires - France SUD                                                                                                                                                                 | CNR Virus des Infections Respiratoires - France SUD                                      | Antonin Bal, Gregory Destras, Gwendolynne Burfin, Hadrien Regue, Quentin Semanas, Martine Valette, Bruno Lina, Laurence Josset                                                                                                                                                                                                                                                                                                                            |                                                                                                                                                                      |
| EPI_ISL_1314203, EPI_ISL_1314206                                                                                                                                                                                                                                                                                                                                                                                                                                                                                                                                                                                                                                                                                                                                                                                                                                                                                                                                                                        | Gravity Diagnostics                                                                                                                                                                                                 | Kentucky State Public Health Lab                                                         | Stephanie Lunn, Karim George, Joshua Tobias, William Grooms, Vaneet Arora, Matthew Johnson, Rachel Zinner, Rhonda Lucas                                                                                                                                                                                                                                                                                                                                   |                                                                                                                                                                      |
| EPI_ISL_1314241                                                                                                                                                                                                                                                                                                                                                                                                                                                                                                                                                                                                                                                                                                                                                                                                                                                                                                                                                                                         | University of Wisconsin-Madison AIDS Vaccine Research Laboratories                                                                                                                                                  | University of Wisconsin-Madison AIDS Vaccine Research Laboratories                       | Gage Moreno, Katarina Braun, et al. AIDS Vaccine Research Laboratories                                                                                                                                                                                                                                                                                                                                                                                    |                                                                                                                                                                      |
| EPI_ISL_1314261                                                                                                                                                                                                                                                                                                                                                                                                                                                                                                                                                                                                                                                                                                                                                                                                                                                                                                                                                                                         | Kansas Health and Environmental Lab                                                                                                                                                                                 | Kansas Health and Environmental Lab                                                      | Mike Grose, Jonathan Barnell, Ben Olsen, and Phil Adam                                                                                                                                                                                                                                                                                                                                                                                                    |                                                                                                                                                                      |
| EPI_ISL_1314382, EPI_ISL_1314389                                                                                                                                                                                                                                                                                                                                                                                                                                                                                                                                                                                                                                                                                                                                                                                                                                                                                                                                                                        | Hospital General Universitario Gregorio Marañón                                                                                                                                                                     | Hospital General Universitario Gregorio Marañón                                          | Dario García de Viedma, Pedro Sola Campoy, Laura Pérez-Lago, Cristina Rodríguez-Grande, Pilar Catalán, Patricia Muñoz, Sergio Buenestado Serrano                                                                                                                                                                                                                                                                                                          |                                                                                                                                                                      |
| EPI_ISL_1314986, EPI_ISL_1314989,                                                                                                                                                                                                                                                                                                                                                                                                                                                                                                                                                                                                                                                                                                                                                                                                                                                                                                                                                                       | National Institute of Public Health                                                                                                                                                                                 | National Institute of Public Health                                                      | Helena Jirincova, Jaromira Vecerova, Timotej Suri, Dusan Trnka, Alexander Nagy                                                                                                                                                                                                                                                                                                                                                                            |                                                                                                                                                                      |

|                                                                                                                                                                                                                                                                                                                                                                                                                                                                                            |                                                                                                                                                |                                                                                                                                                        |                                                                                                                                                                                                                                                                                                                                                                                                                                                  |  |
|--------------------------------------------------------------------------------------------------------------------------------------------------------------------------------------------------------------------------------------------------------------------------------------------------------------------------------------------------------------------------------------------------------------------------------------------------------------------------------------------|------------------------------------------------------------------------------------------------------------------------------------------------|--------------------------------------------------------------------------------------------------------------------------------------------------------|--------------------------------------------------------------------------------------------------------------------------------------------------------------------------------------------------------------------------------------------------------------------------------------------------------------------------------------------------------------------------------------------------------------------------------------------------|--|
| EPI_ISL_1314993, EPI_ISL_1315013, EPI_ISL_1315035                                                                                                                                                                                                                                                                                                                                                                                                                                          |                                                                                                                                                |                                                                                                                                                        |                                                                                                                                                                                                                                                                                                                                                                                                                                                  |  |
| EPI_ISL_1315074                                                                                                                                                                                                                                                                                                                                                                                                                                                                            | Texas A&M College of Veterinary Medicine & Biomedical Sciences via Wisconsin Veterinary Diagnostic Laboratory, University of Wisconsin-Madison | Diagnostic Virology Laboratory, National Veterinary Services Laboratories, USDA1920 Dayton Avenue, Ames, IA 50010, USA                                 | Kerrie M. Franzen, Mary L. Killian, Emily R. Love, Sarah A. Hamer, Gabriel L. Hamer, Ria R. Ghai, Casey Barton Behravesh, Ailam Lim                                                                                                                                                                                                                                                                                                              |  |
| EPI_ISL_1315128, EPI_ISL_1315135, EPI_ISL_1315148, EPI_ISL_1315152, EPI_ISL_1315153, EPI_ISL_1315154, EPI_ISL_1315158, EPI_ISL_1315159, EPI_ISL_1315160, EPI_ISL_1315163, EPI_ISL_1315165, EPI_ISL_1315169, EPI_ISL_1315170, EPI_ISL_1315173, EPI_ISL_1315177, EPI_ISL_1315180, EPI_ISL_1315183, EPI_ISL_1315184, EPI_ISL_1315191, EPI_ISL_1315192, EPI_ISL_1315194, EPI_ISL_1315198, EPI_ISL_1315201, EPI_ISL_1315206, EPI_ISL_1315210, EPI_ISL_1315213, EPI_ISL_1315216, EPI_ISL_1315221 |                                                                                                                                                |                                                                                                                                                        |                                                                                                                                                                                                                                                                                                                                                                                                                                                  |  |
| see above                                                                                                                                                                                                                                                                                                                                                                                                                                                                                  | The Jackson Laboratory                                                                                                                         | The Jackson Laboratory                                                                                                                                 | Bergeron D, Renzette N, Adams M, Omerza G, Kelly K, Li L                                                                                                                                                                                                                                                                                                                                                                                         |  |
| EPI_ISL_1315303                                                                                                                                                                                                                                                                                                                                                                                                                                                                            | National Food and Veterinary Risk Assessment Institute                                                                                         | Vilnius University Hospital Santaros Klinikos, Center of Laboratory Medicine                                                                           | Ingrida Olendraite, Gytis Dudas, Rimvydas Norvilas, Dovile Ezerskyte, Daniel Naumovas, Ligita Raugaite, Monika Katenaite, Mindaugas Stoskus, Laimonas Griskevicius                                                                                                                                                                                                                                                                               |  |
| EPI_ISL_1315381                                                                                                                                                                                                                                                                                                                                                                                                                                                                            | Division of Emerging Infectious Diseases, Bureau of Infectious Diseases Diagnosis Control, Korea Disease Control and Prevention Agency         | Division of Emerging Infectious Diseases, Bureau of Infectious Diseases Diagnosis Control, Korea Disease Control and Prevention Agency                 | Ae Kyung Park, Il-Hwan Kim, Heui Man Kim, Jeong-Min Kim, Jeong-Ah Kim, Chae Young Lee, Jin Sun No, Eun-Jin Kim                                                                                                                                                                                                                                                                                                                                   |  |
| EPI_ISL_1315424                                                                                                                                                                                                                                                                                                                                                                                                                                                                            | Laboratory for Respiratory Viruses, Cantacuzino National Military-Medical Institute for Research and Development                               | Cantacuzino Institute Virology                                                                                                                         | Luiza Ustea, Nicoleta Paraschiv, Catalina Pascu, Mihaela Lazar                                                                                                                                                                                                                                                                                                                                                                                   |  |
| EPI_ISL_1315475, EPI_ISL_1315476, EPI_ISL_1315477, EPI_ISL_1315478                                                                                                                                                                                                                                                                                                                                                                                                                         | Department of Respiratory and other Viral Infections of L.V.Gromashevsky Institute of Epidemiology & Infectious Diseases NAMS of Ukraine       | Department of Respiratory and other Viral Infections of L.V.Gromashevsky Institute of Epidemiology & Infectious Diseases NAMS of Ukraine, JSC "Farmak" | Alla Mironenko, Andriy Goy, Ihor Kravchuk, Ludmyla Bolotova, Larysa Radchenko, Natalia Teteriuk                                                                                                                                                                                                                                                                                                                                                  |  |
| EPI_ISL_1316139                                                                                                                                                                                                                                                                                                                                                                                                                                                                            | Lighthouse Lab in Cambridge                                                                                                                    | Wellcome Sanger Institute for the COVID-19 Genomics UK (COG-UK) Consortium                                                                             | Rob Howes, The Lighthouse Lab in Cambridge and Alex Alderton, Roberto Amato, Jeffrey Barrett, Sonia Goncalves, Ewan Harrison, David K. Jackson, Ian Johnston, Dominic Kwiatkowski, Cordelia Langford, John Sillitoe on behalf of the Wellcome Sanger Institute COVID-19 Surveillance Team                                                                                                                                                        |  |
| EPI_ISL_1317309, EPI_ISL_1317597                                                                                                                                                                                                                                                                                                                                                                                                                                                           | Furst Medical Laboratory                                                                                                                       | Norwegian Institute of Public Health, Department of Virology                                                                                           | Kathrine Stene-Johansen, Kamilla Heddeland Instefjord, Hilde Elshaug, Garcia Llorente Ignacio, Jon Bråte, Engebretsen Serina Beate, Pedersen Benedikte Nevjen, Debech Nadia, Atiya R Ali, Marie Paulsen Madsen, Rasmus Riis Kopperud, Hilde Vollan, Karoline Bragstad, Olav Hungnes                                                                                                                                                              |  |
| EPI_ISL_1317609                                                                                                                                                                                                                                                                                                                                                                                                                                                                            | Haukeland University Hospital, Dept. of Microbiology                                                                                           | Norwegian Institute of Public Health, Department of Virology                                                                                           | Kathrine Stene-Johansen, Kamilla Heddeland Instefjord, Hilde Elshaug, Garcia Llorente Ignacio, Jon Bråte, Engebretsen Serina Beate, Pedersen Benedikte Nevjen, Debech Nadia, Atiya R Ali, Marie Paulsen Madsen, Rasmus Riis Kopperud, Hilde Vollan, Karoline Bragstad, Olav Hungnes                                                                                                                                                              |  |
| EPI_ISL_1318144                                                                                                                                                                                                                                                                                                                                                                                                                                                                            | University of Liège COVID-19 testing center                                                                                                    | GIGA Medical Genomics                                                                                                                                  | Keith Durkin, Maria Artesi, Sébastien Bontems, Raphaël Boreux, Bouchra Boujemla, Nathalie Renotte, Cécile Meex, Pierrette Melin, Marie-Pierre Hayette, Vincent Bours                                                                                                                                                                                                                                                                             |  |
| EPI_ISL_1318227, EPI_ISL_1318242                                                                                                                                                                                                                                                                                                                                                                                                                                                           | LA Office of Public Health Laboratories                                                                                                        | Genomics and Discovery, Respiratory Viruses Branch, Division of Viral Diseases, Centers for Disease Control and Prevention                             | Ying Tao, Jing Zhang, Yan Li, Brian Lynch, Anna Kelleher, Krista Queen, Anna Uehara, Peter Cook, Han Jia Justin Ng, Clinton R. Paden, Haibin Wang, Suxiang Tong                                                                                                                                                                                                                                                                                  |  |
| EPI_ISL_1318252                                                                                                                                                                                                                                                                                                                                                                                                                                                                            | TN Division of Laboratory Services                                                                                                             | Genomics and Discovery, Respiratory Viruses Branch, Division of Viral Diseases, Centers for Disease Control and Prevention                             | Ying Tao, Jing Zhang, Yan Li, Brian Lynch, Anna Kelleher, Krista Queen, Anna Uehara, Peter Cook, Han Jia Justin Ng, Clinton R. Paden, Haibin Wang, Suxiang Tong                                                                                                                                                                                                                                                                                  |  |
| EPI_ISL_1318263                                                                                                                                                                                                                                                                                                                                                                                                                                                                            | LA Office of Public Health Laboratories                                                                                                        | Genomics and Discovery, Respiratory Viruses Branch, Division of Viral Diseases, Centers for Disease Control and Prevention                             | Ying Tao, Jing Zhang, Yan Li, Brian Lynch, Anna Kelleher, Krista Queen, Anna Uehara, Peter Cook, Han Jia Justin Ng, Clinton R. Paden, Haibin Wang, Suxiang Tong                                                                                                                                                                                                                                                                                  |  |
| EPI_ISL_1318695                                                                                                                                                                                                                                                                                                                                                                                                                                                                            | Ohio Department of Health Laboratory                                                                                                           | Ohio Department of Health Laboratory                                                                                                                   | Holmes, Jennifer; Eric Brandt, Keoni Omura, Glen McGilivray, Caitlin McDonnell, Jade Mowery, Stephanie Mccracken, Tyler Payne, Kirtana Ramadugu, Erica Leasure, Brent Lee, Kelsey Florek, Heather Blankenship, Allison Black, Quanta Brown, and Tammy Bannerman                                                                                                                                                                                  |  |
| EPI_ISL_1321358, EPI_ISL_1321359, EPI_ISL_1321361, EPI_ISL_1321377, EPI_ISL_1321403                                                                                                                                                                                                                                                                                                                                                                                                        | National Institute of Public Health                                                                                                            | National Reference Laboratory for Influenza and Respiratory Viruses CZE                                                                                | Helena Jirincova, Jaromira Vecerova, Timotej Suri, Dusan Trnka, Alexander Nagy                                                                                                                                                                                                                                                                                                                                                                   |  |
| EPI_ISL_1321457, EPI_ISL_1321458, EPI_ISL_1321460, EPI_ISL_1321461, EPI_ISL_1321464                                                                                                                                                                                                                                                                                                                                                                                                        | Genetica Molecular and Subdepartamento de Virologia ISP Chile                                                                                  | Instituto de Salud Publica de Chile                                                                                                                    | Javier Tognarelli, Karen Orostica, Barbara Parra, Loredana Arata, Jaime Lagos, Gisselle Barra, Patricia Bustos, Rodrigo Fasce, Andres Castillo, Jorge Fernandez                                                                                                                                                                                                                                                                                  |  |
| EPI_ISL_1321667, EPI_ISL_1321705                                                                                                                                                                                                                                                                                                                                                                                                                                                           | Clinical Molecular Microbiology Laboratory, UNC Hospitals                                                                                      | Jeremy Wang                                                                                                                                            | Jeremy Wang, Alexander Rubinsteyn, Colleen Rice, Jason Smedberg, Shawn Hawken, Melissa Miller, Corbin Jones, Robert Hagan                                                                                                                                                                                                                                                                                                                        |  |
| EPI_ISL_1321744                                                                                                                                                                                                                                                                                                                                                                                                                                                                            | Università degli Studi di Perugia                                                                                                              | Istituto Zooprofilattico Sperimentale dell'Abruzzo e Molise "G. Caporale"                                                                              | Mencacci A, Camilloni B, Lorusso A, Marcacci M, Di Domenico M, Ancora M, Curini V, Mangone I, Rinaldi A, Scialabba S, Di Pasquale A, Cammà C, Puglia I, Calistri P, Savini G                                                                                                                                                                                                                                                                     |  |
| EPI_ISL_1321801                                                                                                                                                                                                                                                                                                                                                                                                                                                                            | Istituto Zooprofilattico Sperimentale Umbria e Marche "Togo Rosati"                                                                            | Istituto Zooprofilattico Sperimentale dell'Abruzzo e Molise "G. Caporale"                                                                              | Biagetti M, Giammaroli M, Lorusso A, Marcacci M, Di Domenico M, Ancora M, Curini V, Mangone I, Rinaldi A, Scialabba S, Di Pasquale A, Cammà C, Puglia I, Calistri P, Savini G                                                                                                                                                                                                                                                                    |  |
| EPI_ISL_1321819, EPI_ISL_1321857, EPI_ISL_1321858, EPI_ISL_1321880, EPI_ISL_1321881, EPI_ISL_1321886, EPI_ISL_1321887, EPI_ISL_1321890                                                                                                                                                                                                                                                                                                                                                     | TXDSHS                                                                                                                                         | TXDSHS                                                                                                                                                 | Rashmi Tuladhar, Bonnie Oh, Jenny Zhang, Maliha Rahman, Mayela Pedrueza, Anita Pokharel, Myong Koag, Chun Wang, Rachel Lee, Grace Kubin                                                                                                                                                                                                                                                                                                          |  |
| EPI_ISL_1321900, EPI_ISL_1321940, EPI_ISL_1321990                                                                                                                                                                                                                                                                                                                                                                                                                                          | LIC                                                                                                                                            | Latvian Biomedical Research and Study Centre                                                                                                           | Janis Pjalkovskis, Nikita Zrelavs, Monta Ustinova, Ivars Silamikelis, Liga Birzniece, Kaspars Megnis, Una Krumina, Guntars Zarins, Vita Rovite, Lauma Freimane, Laila Silamikele, Laura Ansona, Davids Fridmanis, Elina Dimina, Reinis Zeltmatis, Diana Dusacka, Jurijs Perevoscikovs, Uga Dumpis, Janis Klovins                                                                                                                                 |  |
| EPI_ISL_1322136                                                                                                                                                                                                                                                                                                                                                                                                                                                                            | Microbiology Department, Laboratori Clínic Metropolitana Nord. Hospital Universitari Germans Trias i Pujol.                                    | Can Ruti SARS-CoV-2 Sequencing Hub (HUGTIP/IrsiCaixa/IGTP)                                                                                             | Marc Noguera-Julian, Pilar Armengol, Ignacio Blanco, Antoni E Bordoy, Francesc Catala-Moll, Pere-Joan Cardona, Julia G Prado, Carol Galvez Maria Casadella, Cristina Casan, Gemma Clara, Irina Pey, Jordi Barretina, Bonaventura Clotet, Cristina Esteban, Montserrat Giménez, Mercedes Guerrero, Anna Not, Roger Paredes, Mariona Parera, Verónica Saludes, Alba Sánchez, and Elisa Martró on behalf of the Can Ruti SARS-CoV-2 Sequencing Hub. |  |
| EPI_ISL_1322259                                                                                                                                                                                                                                                                                                                                                                                                                                                                            | Dept. of Microbiology and Infection Control, Akershus University Hospital HF                                                                   | Dept. of Microbiology and Infection Control, Akershus University Hospital HF                                                                           | Hege Vangstein Aamot, Alexander Hesselberg Lovestad                                                                                                                                                                                                                                                                                                                                                                                              |  |
| EPI_ISL_1322367                                                                                                                                                                                                                                                                                                                                                                                                                                                                            | LBM CERBALLIANCE "LA VILLA"                                                                                                                    | CNR Virus des Infections Respiratoires - France SUD                                                                                                    | Antonin Bal, Gregory Destras, Gwendolynne Burfin, Hadrien Regue, Quentin Semanas, Martine Valette, Bruno Lina, Laurence Josset                                                                                                                                                                                                                                                                                                                   |  |
| EPI_ISL_1322514, EPI_ISL_1322543                                                                                                                                                                                                                                                                                                                                                                                                                                                           | KU Leuven, Rega Institute, Clinical and Epidemiological Virology                                                                               | KU Leuven, Rega Institute, Clinical and Epidemiological Virology                                                                                       | Tony Wawina-Bokalanga, Bert Vanmechelen, Joan Marti-Carerras, Piet Maes                                                                                                                                                                                                                                                                                                                                                                          |  |
| EPI_ISL_1322745, EPI_ISL_1322746, EPI_ISL_1322755, EPI_ISL_1322763, EPI_ISL_1322783, EPI_ISL_1322789, EPI_ISL_1322805, EPI_ISL_1322811, EPI_ISL_1322812, EPI_ISL_1322821, EPI_ISL_1322828                                                                                                                                                                                                                                                                                                  |                                                                                                                                                |                                                                                                                                                        |                                                                                                                                                                                                                                                                                                                                                                                                                                                  |  |
| see above                                                                                                                                                                                                                                                                                                                                                                                                                                                                                  | NYU Langone Health                                                                                                                             | Departments of Pathology and Medicine, New York University School of Medicine                                                                          | Adriana Heguy, Dacia Dimartino, Emily Guzman, Christian Marier, Peter Meyn, Sitharam Ramaswami, Gael Westby, Paul Zappile, Yutong Zhang, Paolo Cotzia, Guiqing Wang                                                                                                                                                                                                                                                                              |  |
| EPI_ISL_1323462                                                                                                                                                                                                                                                                                                                                                                                                                                                                            | Illinois Department of Public Health                                                                                                           | Gagnon Lab, Southern Illinois University                                                                                                               | Keith Gagnon                                                                                                                                                                                                                                                                                                                                                                                                                                     |  |
| EPI_ISL_1323899                                                                                                                                                                                                                                                                                                                                                                                                                                                                            | Hospital Universitari Vall d'Hebron - Vall d'Hebron Institut de Recerca                                                                        | Hospital Universitari Vall d'Hebron - Vall d'Hebron Institut de Recerca                                                                                | Cristina Andrés, Maria Piñana, Josep F Abril, Damir Garcia-Cehic, Ariadna Rando, Juliana Esperalba, Maria Gema Codina, Carla Castillo, Maria Carmen Martín, Tomás Pumarola, Josep Quer, Andrés Antón                                                                                                                                                                                                                                             |  |
| EPI_ISL_1323985                                                                                                                                                                                                                                                                                                                                                                                                                                                                            | Ostfold Hospital Trust - Kalnes, Centre for Laboratory Medicine, Section for gene technology and infection serology                            | Norwegian Institute of Public Health, Department of Virology                                                                                           | Kathrine Stene-Johansen, Kamilla Heddeland Instefjord, Hilde Elshaug, Garcia Llorente Ignacio, Jon Bråte, Engebretsen Serina Beate, Pedersen Benedikte Nevjen, Debech Nadia, Atiya R Ali, Marie Paulsen Madsen, Rasmus Riis Kopperud, Hilde Vollan, Karoline Bragstad, Olav Hungnes                                                                                                                                                              |  |
| EPI_ISL_1324571                                                                                                                                                                                                                                                                                                                                                                                                                                                                            | Vilnius University Hospital Santaros Klinikos, Center of                                                                                       | Vilnius University Hospital Santaros Klinikos, Center of                                                                                               | Daniel Naumovas, Ingrida Olendraite, Gytis Dudas, Rimvydas Norvilas, Dovile Ezerskyte, Ligita Raugaite, Monika Katenaite, Mindaugas Stoskus, Laimonas                                                                                                                                                                                                                                                                                            |  |

|                                                                                                                                                                          | Laboratory Medicine                                                                                                                                                  | Laboratory Medicine                                                                                                                                                  | Grisevicius                                                                                                                                                                                                                                                                                                                                                                                                                 |
|--------------------------------------------------------------------------------------------------------------------------------------------------------------------------|----------------------------------------------------------------------------------------------------------------------------------------------------------------------|----------------------------------------------------------------------------------------------------------------------------------------------------------------------|-----------------------------------------------------------------------------------------------------------------------------------------------------------------------------------------------------------------------------------------------------------------------------------------------------------------------------------------------------------------------------------------------------------------------------|
| EPI_ISL_1324653                                                                                                                                                          | National Medical Research Center for Obstetrics, Gynecology and Perinatology named after Academician V.I.Kulakov of the Ministry of Healthcare of Russian Federation | National Medical Research Center for Obstetrics, Gynecology and Perinatology named after Academician V.I.Kulakov of the Ministry of Healthcare of Russian Federation | Jekaterina Shubina, Andrey Goltsov, Denis Rebrikov, Dmitry Korostin, Yegor Botsmanov, Dmitry Abramov, Andrey Donnikov, Tatiana Priputnevich, Dmitry Trofimov                                                                                                                                                                                                                                                                |
| EPI_ISL_1324731                                                                                                                                                          | Laboratorio de Virología HUCA                                                                                                                                        | Laboratorio de Virología HUCA                                                                                                                                        | Sandoval M, Castelló C, Gómez de Oña J, Boga JA, Rojo S, Alvarez-Arguelles ME, Abreu F, Costales I, Perez-Martínez Z, Martín-Rodríguez G, Coto E, Melón S                                                                                                                                                                                                                                                                   |
| EPI_ISL_1324832, EPI_ISL_1325888                                                                                                                                         | Lighthouse Lab in Milton Keynes                                                                                                                                      | Wellcome Sanger Institute for the COVID-19 Genomics UK (COG-UK) Consortium                                                                                           | The Lighthouse Lab in Milton Keynes and Alex Alderton, Roberto Amato, Jeffrey Barrett, Sonia Goncalves, Ewan Harrison, David K. Jackson, Ian Johnston, Dominic Kwiatkowski, Cordelia Langford, John Sillitoe on behalf of the Wellcome Sanger Institute COVID-19 Surveillance Team                                                                                                                                          |
| EPI_ISL_1326708, EPI_ISL_1326809                                                                                                                                         | Randox Laboratories                                                                                                                                                  | Wellcome Sanger Institute for the COVID-19 Genomics UK (COG-UK) Consortium                                                                                           | Randox Laboratories and Alex Alderton, Roberto Amato, Jeffrey Barrett, Sonia Goncalves, Ewan Harrison, David K. Jackson, Ian Johnston, Dominic Kwiatkowski, Cordelia Langford, John Sillitoe on behalf of the Wellcome Sanger Institute COVID-19 Surveillance Team                                                                                                                                                          |
| EPI_ISL_1327064, EPI_ISL_1327106, EPI_ISL_1327129                                                                                                                        | Lighthouse Lab in Alderley Park                                                                                                                                      | Wellcome Sanger Institute for the COVID-19 Genomics UK (COG-UK) Consortium                                                                                           | Jacquelyn Wynn, Mairead Hyland, The Lighthouse Lab in Alderley Park and Alex Alderton, Roberto Amato, Jeffrey Barrett, Sonia Goncalves, Ewan Harrison, David K. Jackson, Ian Johnston, Dominic Kwiatkowski, Cordelia Langford, John Sillitoe on behalf of the Wellcome Sanger Institute COVID-19 Surveillance Team                                                                                                          |
| EPI_ISL_1327478                                                                                                                                                          | Lighthouse Lab in Cambridge                                                                                                                                          | Wellcome Sanger Institute for the COVID-19 Genomics UK (COG-UK) Consortium                                                                                           | Rob Howes, The Lighthouse Lab in Cambridge and Alex Alderton, Roberto Amato, Jeffrey Barrett, Sonia Goncalves, Ewan Harrison, David K. Jackson, Ian Johnston, Dominic Kwiatkowski, Cordelia Langford, John Sillitoe on behalf of the Wellcome Sanger Institute COVID-19 Surveillance Team                                                                                                                                   |
| EPI_ISL_1327714, EPI_ISL_1327944, EPI_ISL_1328396                                                                                                                        | Lighthouse Lab in Glasgow                                                                                                                                            | Wellcome Sanger Institute for the COVID-19 Genomics UK (COG-UK) Consortium                                                                                           | Harper VanSteenhouse, Yumi Kasai, David Gray, Carol Clugston, Anna Dominiczak and Alex Alderton, Roberto Amato, Jeffrey Barrett, Sonia Goncalves, Ewan Harrison, David K. Jackson, Ian Johnston, Dominic Kwiatkowski, Cordelia Langford, John Sillitoe on behalf of the Wellcome Sanger Institute COVID-19 Surveillance Team                                                                                                |
| EPI_ISL_1328432, EPI_ISL_1328597, EPI_ISL_1328647                                                                                                                        | Lighthouse Lab in Milton Keynes                                                                                                                                      | Wellcome Sanger Institute for the COVID-19 Genomics UK (COG-UK) Consortium                                                                                           | The Lighthouse Lab in Milton Keynes and Alex Alderton, Roberto Amato, Jeffrey Barrett, Sonia Goncalves, Ewan Harrison, David K. Jackson, Ian Johnston, Dominic Kwiatkowski, Cordelia Langford, John Sillitoe on behalf of the Wellcome Sanger Institute COVID-19 Surveillance Team                                                                                                                                          |
| EPI_ISL_1328728                                                                                                                                                          | Lighthouse Lab in Cambridge                                                                                                                                          | Wellcome Sanger Institute for the COVID-19 Genomics UK (COG-UK) Consortium                                                                                           | Rob Howes, The Lighthouse Lab in Cambridge and Alex Alderton, Roberto Amato, Jeffrey Barrett, Sonia Goncalves, Ewan Harrison, David K. Jackson, Ian Johnston, Dominic Kwiatkowski, Cordelia Langford, John Sillitoe on behalf of the Wellcome Sanger Institute COVID-19 Surveillance Team                                                                                                                                   |
| EPI_ISL_1329034                                                                                                                                                          | Lighthouse Lab in Alderley Park                                                                                                                                      | Wellcome Sanger Institute for the COVID-19 Genomics UK (COG-UK) Consortium                                                                                           | Jacquelyn Wynn, Mairead Hyland, The Lighthouse Lab in Alderley Park and Alex Alderton, Roberto Amato, Jeffrey Barrett, Sonia Goncalves, Ewan Harrison, David K. Jackson, Ian Johnston, Dominic Kwiatkowski, Cordelia Langford, John Sillitoe on behalf of the Wellcome Sanger Institute COVID-19 Surveillance Team                                                                                                          |
| EPI_ISL_1329567                                                                                                                                                          | Lighthouse Lab in Glasgow                                                                                                                                            | Wellcome Sanger Institute for the COVID-19 Genomics UK (COG-UK) Consortium                                                                                           | Harper VanSteenhouse, Yumi Kasai, David Gray, Carol Clugston, Anna Dominiczak and Alex Alderton, Roberto Amato, Jeffrey Barrett, Sonia Goncalves, Ewan Harrison, David K. Jackson, Ian Johnston, Dominic Kwiatkowski, Cordelia Langford, John Sillitoe on behalf of the Wellcome Sanger Institute COVID-19 Surveillance Team                                                                                                |
| EPI_ISL_1329733, EPI_ISL_1329854                                                                                                                                         | Lighthouse Lab in Milton Keynes                                                                                                                                      | Wellcome Sanger Institute for the COVID-19 Genomics UK (COG-UK) Consortium                                                                                           | The Lighthouse Lab in Milton Keynes and Alex Alderton, Roberto Amato, Jeffrey Barrett, Sonia Goncalves, Ewan Harrison, David K. Jackson, Ian Johnston, Dominic Kwiatkowski, Cordelia Langford, John Sillitoe on behalf of the Wellcome Sanger Institute COVID-19 Surveillance Team                                                                                                                                          |
| EPI_ISL_1330568                                                                                                                                                          | Lighthouse Lab in Cambridge                                                                                                                                          | Wellcome Sanger Institute for the COVID-19 Genomics UK (COG-UK) Consortium                                                                                           | Rob Howes, The Lighthouse Lab in Cambridge and Alex Alderton, Roberto Amato, Jeffrey Barrett, Sonia Goncalves, Ewan Harrison, David K. Jackson, Ian Johnston, Dominic Kwiatkowski, Cordelia Langford, John Sillitoe on behalf of the Wellcome Sanger Institute COVID-19 Surveillance Team                                                                                                                                   |
| EPI_ISL_1330912                                                                                                                                                          | Lighthouse Lab in Milton Keynes                                                                                                                                      | Wellcome Sanger Institute for the COVID-19 Genomics UK (COG-UK) Consortium                                                                                           | The Lighthouse Lab in Milton Keynes and Alex Alderton, Roberto Amato, Jeffrey Barrett, Sonia Goncalves, Ewan Harrison, David K. Jackson, Ian Johnston, Dominic Kwiatkowski, Cordelia Langford, John Sillitoe on behalf of the Wellcome Sanger Institute COVID-19 Surveillance Team                                                                                                                                          |
| EPI_ISL_1331317                                                                                                                                                          | Lighthouse Lab in Alderley Park                                                                                                                                      | Wellcome Sanger Institute for the COVID-19 Genomics UK (COG-UK) Consortium                                                                                           | Jacquelyn Wynn, Mairead Hyland, The Lighthouse Lab in Alderley Park and Alex Alderton, Roberto Amato, Jeffrey Barrett, Sonia Goncalves, Ewan Harrison, David K. Jackson, Ian Johnston, Dominic Kwiatkowski, Cordelia Langford, John Sillitoe on behalf of the Wellcome Sanger Institute COVID-19 Surveillance Team                                                                                                          |
| EPI_ISL_1331695                                                                                                                                                          | Lighthouse Lab in Glasgow                                                                                                                                            | Wellcome Sanger Institute for the COVID-19 Genomics UK (COG-UK) Consortium                                                                                           | Harper VanSteenhouse, Yumi Kasai, David Gray, Carol Clugston, Anna Dominiczak and Alex Alderton, Roberto Amato, Jeffrey Barrett, Sonia Goncalves, Ewan Harrison, David K. Jackson, Ian Johnston, Dominic Kwiatkowski, Cordelia Langford, John Sillitoe on behalf of the Wellcome Sanger Institute COVID-19 Surveillance Team                                                                                                |
| EPI_ISL_1331736, EPI_ISL_1331813                                                                                                                                         | Lighthouse Lab in Alderley Park                                                                                                                                      | Wellcome Sanger Institute for the COVID-19 Genomics UK (COG-UK) Consortium                                                                                           | Jacquelyn Wynn, Mairead Hyland, The Lighthouse Lab in Alderley Park and Alex Alderton, Roberto Amato, Jeffrey Barrett, Sonia Goncalves, Ewan Harrison, David K. Jackson, Ian Johnston, Dominic Kwiatkowski, Cordelia Langford, John Sillitoe on behalf of the Wellcome Sanger Institute COVID-19 Surveillance Team                                                                                                          |
| EPI_ISL_1331825, EPI_ISL_1332367, EPI_ISL_1332459, EPI_ISL_1332599, EPI_ISL_1333109, EPI_ISL_1333173                                                                     | Lighthouse Lab in Glasgow                                                                                                                                            | Wellcome Sanger Institute for the COVID-19 Genomics UK (COG-UK) Consortium                                                                                           | Harper VanSteenhouse, Yumi Kasai, David Gray, Carol Clugston, Anna Dominiczak and Alex Alderton, Roberto Amato, Jeffrey Barrett, Sonia Goncalves, Ewan Harrison, David K. Jackson, Ian Johnston, Dominic Kwiatkowski, Cordelia Langford, John Sillitoe on behalf of the Wellcome Sanger Institute COVID-19 Surveillance Team                                                                                                |
| EPI_ISL_1333846                                                                                                                                                          | Lighthouse Lab in Cambridge                                                                                                                                          | Wellcome Sanger Institute for the COVID-19 Genomics UK (COG-UK) Consortium                                                                                           | Rob Howes, The Lighthouse Lab in Cambridge and Alex Alderton, Roberto Amato, Jeffrey Barrett, Sonia Goncalves, Ewan Harrison, David K. Jackson, Ian Johnston, Dominic Kwiatkowski, Cordelia Langford, John Sillitoe on behalf of the Wellcome Sanger Institute COVID-19 Surveillance Team                                                                                                                                   |
| EPI_ISL_1333984                                                                                                                                                          | Lighthouse Lab in Glasgow                                                                                                                                            | Wellcome Sanger Institute for the COVID-19 Genomics UK (COG-UK) Consortium                                                                                           | Harper VanSteenhouse, Yumi Kasai, David Gray, Carol Clugston, Anna Dominiczak and Alex Alderton, Roberto Amato, Jeffrey Barrett, Sonia Goncalves, Ewan Harrison, David K. Jackson, Ian Johnston, Dominic Kwiatkowski, Cordelia Langford, John Sillitoe on behalf of the Wellcome Sanger Institute COVID-19 Surveillance Team                                                                                                |
| EPI_ISL_1334349                                                                                                                                                          | Hospital Universitari Arnau de Vilanova                                                                                                                              | Hospital Universitari Vall d'Hebron - Vall d'Hebron Institut de Recerca                                                                                              | Cristina Andrés, Maria Piñana, Josep F Abril, Damir Garcia-Cehic, Ariadna Rando, Juliana Esperalba, Maria Gema Codina, Carla Castillo, Maria Carmen Martín, Tomás Pumarola, Josep Quer, Andrés Antón                                                                                                                                                                                                                        |
| EPI_ISL_1334384                                                                                                                                                          | Laboratorios Lister                                                                                                                                                  | Instituto de Diagnóstico y Referencia Epidemiológicos (INDRE)                                                                                                        | Claudia Wong-Arambula, Abril Rodriguez-Maldonado, Vanessa Rivero-Arredondo, Ariadna Medina-Benitez, Joaquín Quiroz-Mercado, Sergio Rangel-Guerrero, Natividad Cruz-Ortiz, Tatiana Nunez-Garcia, Gisela Barrera-Badillo, Lucia Hernandez-Rivas, Irma Lopez-Martinez, Ernesto Ramirez-Gonzalez.                                                                                                                               |
| EPI_ISL_1334624, EPI_ISL_1334735, EPI_ISL_1334741, EPI_ISL_1334749, EPI_ISL_1334801, EPI_ISL_1334807, EPI_ISL_1334844, EPI_ISL_1334949, EPI_ISL_1334959, EPI_ISL_1335002 | Public Health Ontario Laboratory                                                                                                                                     | Public Health Ontario Laboratory                                                                                                                                     | Vanessa G Allen, Philip Banh, Yao Chen, Richard de Borja, Alireza Eshaghi, Nahuel Fittipaldi, Christine Frantz, Jonathan B Gubbay, Jennifer L Guthrie, Lawrence Heisler, Esha Joshi, Michael Laszloffy, Aimin Li, Michael CY Li, Dean Maxwell, Sandeep Nagra, Samir N Patel, Jared Simpson, Karthikeyan Sivaraman, Ashleigh Sullivan, Yogi Sundaravadanam, Sarah Teatero, Andre Villegas, Matthew Watson, Sandra Zittermann |
| EPI_ISL_1335410                                                                                                                                                          | National Laboratory for Health, Environment and Food, OMM, Kranj                                                                                                     | CISLD (Clinical Institute of Special Laboratory Diagnostics), University Children's Hospital, University Medical Center Ljubljana                                    | Jernej Kova, Barbara Jenko Bizjan, Tine Tesovnik, Robert Šket, Katarina Kozmos, Ana Grom, Maruša Debeljak, Marko Pokorn, Tadej Battelino                                                                                                                                                                                                                                                                                    |
| EPI_ISL_1335418                                                                                                                                                          | National Laboratory for Health, Environment and Food, OMM, Novo mesto                                                                                                | CISLD (Clinical Institute of Special Laboratory Diagnostics), University Children's Hospital, University Medical Center Ljubljana                                    | Jernej Kova, Barbara Jenko Bizjan, Tine Tesovnik, Robert Šket, Katarina Kozmos, Ana Grom, Maruša Debeljak, Marko Pokorn, Tadej Battelino                                                                                                                                                                                                                                                                                    |
| EPI_ISL_1335531                                                                                                                                                          | National Laboratory for Health, Environment and Food, OMM, Maribor                                                                                                   | CISLD (Clinical Institute of Special Laboratory Diagnostics), University Children's Hospital, University Medical Center Ljubljana                                    | Jernej Kova, Barbara Jenko Bizjan, Tine Tesovnik, Robert Šket, Katarina Kozmos, Ana Grom, Maruša Debeljak, Marko Pokorn, Tadej Battelino                                                                                                                                                                                                                                                                                    |
| EPI_ISL_1335541                                                                                                                                                          | National Laboratory for Health, Environment and Food, OMM, Koper                                                                                                     | CISLD (Clinical Institute of Special Laboratory Diagnostics), University Children's Hospital, University Medical Center Ljubljana                                    | Jernej Kova, Barbara Jenko Bizjan, Tine Tesovnik, Robert Šket, Katarina Kozmos, Ana Grom, Maruša Debeljak, Marko Pokorn, Tadej Battelino                                                                                                                                                                                                                                                                                    |

|                                                                                                                                                                                                                                                                                                                                                                                                                                                                                                                                                                                                                                    |                                                                                                             |                                                                                                                                                    |                                                                                                                                                                                                                                                                                                                                                                                                                                                                                                                                                                                                |
|------------------------------------------------------------------------------------------------------------------------------------------------------------------------------------------------------------------------------------------------------------------------------------------------------------------------------------------------------------------------------------------------------------------------------------------------------------------------------------------------------------------------------------------------------------------------------------------------------------------------------------|-------------------------------------------------------------------------------------------------------------|----------------------------------------------------------------------------------------------------------------------------------------------------|------------------------------------------------------------------------------------------------------------------------------------------------------------------------------------------------------------------------------------------------------------------------------------------------------------------------------------------------------------------------------------------------------------------------------------------------------------------------------------------------------------------------------------------------------------------------------------------------|
| EPI_ISL_1335757                                                                                                                                                                                                                                                                                                                                                                                                                                                                                                                                                                                                                    | LESP Zacatecas                                                                                              | Instituto de diagnóstico y Referencia Epidemiologicos (INDRE) Departamento de Virología                                                            | Claudia Wong-Arambula, Abril Rodriguez-Maldonado, Vanessa Rivero-Arredondo, Ariadna Medina-Benitez, Joaquin Quiroz-Mercado, Sergio Rangel-Guerrero, Natividad Cruz-Ortiz, Tatiana Nunez-Garcia, Gisela Barrera-Badillo, Lucia Hernandez-Rivas, Irma Lopez-Martinez, Ernesto Ramirez-Gonzalez.                                                                                                                                                                                                                                                                                                  |
| EPI_ISL_1335905, EPI_ISL_1335910, EPI_ISL_1335912, EPI_ISL_1335917, EPI_ISL_1335922, EPI_ISL_1335923, EPI_ISL_1335926, EPI_ISL_1335927, EPI_ISL_1335930, EPI_ISL_1335944, EPI_ISL_1335947, EPI_ISL_1335953, EPI_ISL_1335962, EPI_ISL_1335965, EPI_ISL_1335998, EPI_ISL_1336034, EPI_ISL_1336038, EPI_ISL_1336041, EPI_ISL_1336043, EPI_ISL_1336044, EPI_ISL_1336074, EPI_ISL_1336075, EPI_ISL_1336081, EPI_ISL_1336097, EPI_ISL_1336102, EPI_ISL_1336106, EPI_ISL_1336111, EPI_ISL_1336113, EPI_ISL_1336115, EPI_ISL_1336117, EPI_ISL_1336121, EPI_ISL_1336122, EPI_ISL_1336123, EPI_ISL_1336124, EPI_ISL_1336126, EPI_ISL_1336164 | Quest Diagnostics Incorporated                                                                              | Centers for Disease Control and Prevention Division of Viral Diseases, Pathogen Discovery                                                          | Peter W. Cook, Dakota Howard, Dhvani Batra, Ben L. Rambo-Martin, S. H. Rosenthal, A. Gerasimova, R. M. Kagan, B. Anderson, M. Hua, Y. Liu, L.E. Bernstein, K.E. Livingston, A. Perez, I. A. Shlyakhter, R. V. Rolando, R. Owen, P. Tanpaiboon, F. Lacbawan, Clinton R. Paden, Suxiang Tong, Duncan MacCannell                                                                                                                                                                                                                                                                                  |
| see above                                                                                                                                                                                                                                                                                                                                                                                                                                                                                                                                                                                                                          |                                                                                                             |                                                                                                                                                    |                                                                                                                                                                                                                                                                                                                                                                                                                                                                                                                                                                                                |
| EPI_ISL_1336344                                                                                                                                                                                                                                                                                                                                                                                                                                                                                                                                                                                                                    | Labo Analyses Med                                                                                           | National Reference Center for Viruses of Respiratory Infections, Institut Pasteur, Paris                                                           | Marion Barbet, Sylvie Behillil, Méline Bizard, Angela Brisebarre, Camille Capel, Etienne Simon-Lorière, Vincent Enouf, Maud Vanpeene, Sylvie van der Werf, Leonard Pierre-Yves                                                                                                                                                                                                                                                                                                                                                                                                                 |
| EPI_ISL_1336544                                                                                                                                                                                                                                                                                                                                                                                                                                                                                                                                                                                                                    | CH METROPOLE SAVOIE                                                                                         | CNR Virus des Infections Respiratoires - France SUD                                                                                                | Antonin Bal, Gregory Destras, Gwendolynne Burfin, Hadrien Regue, Quentin Semanas, Martine Valette, Bruno Lina, Laurence Josset                                                                                                                                                                                                                                                                                                                                                                                                                                                                 |
| EPI_ISL_1336560                                                                                                                                                                                                                                                                                                                                                                                                                                                                                                                                                                                                                    | LAM ANABIO 05 TOKORO                                                                                        | CNR Virus des Infections Respiratoires - France SUD                                                                                                | Antonin Bal, Gregory Destras, Gwendolynne Burfin, Hadrien Regue, Quentin Semanas, Martine Valette, Bruno Lina, Laurence Josset                                                                                                                                                                                                                                                                                                                                                                                                                                                                 |
| EPI_ISL_1336738                                                                                                                                                                                                                                                                                                                                                                                                                                                                                                                                                                                                                    | SIESP DIPARTIMENTO DI PREVENZIONE TERAMO                                                                    | Istituto Zooprofilattico Sperimentale dell'Abruzzo e Molise "G. Caporale"                                                                          | Lorusso A, Marcacci M, Di Domenico M, Ancora M, Curini V, Di Lollo V, Mangone I, Rinaldi A, Scialabba S, Caporale M, Di Pasquale A, Cammà C, Puglia I, Calistri P, Savini G                                                                                                                                                                                                                                                                                                                                                                                                                    |
| EPI_ISL_1336740                                                                                                                                                                                                                                                                                                                                                                                                                                                                                                                                                                                                                    | SIESP CHIETI - DRIVE IN CHIETI                                                                              | Istituto Zooprofilattico Sperimentale dell'Abruzzo e Molise "G. Caporale"                                                                          | Lorusso A, Marcacci M, Di Domenico M, Ancora M, Curini V, Di Lollo V, Mangone I, Rinaldi A, Scialabba S, Caporale M, Di Pasquale A, Cammà C, Puglia I, Calistri P, Savini G                                                                                                                                                                                                                                                                                                                                                                                                                    |
| EPI_ISL_1336823                                                                                                                                                                                                                                                                                                                                                                                                                                                                                                                                                                                                                    | Azienda Ospedaliera Terni                                                                                   | Istituto Zooprofilattico Sperimentale dell'Abruzzo e Molise "G. Caporale"                                                                          | Palumbo M, Scaccetti A, Lorusso A, Marcacci M, Di Domenico M, Ancora M, Curini V, Mangone I, Rinaldi A, Scialabba S, Caporale M, Di Pasquale A, Cammà C, Puglia I, Calistri P, Savini G                                                                                                                                                                                                                                                                                                                                                                                                        |
| EPI_ISL_1336889, EPI_ISL_1336893                                                                                                                                                                                                                                                                                                                                                                                                                                                                                                                                                                                                   | SIESP DIPARTIMENTO DI PREVENZIONE TERAMO                                                                    | Istituto Zooprofilattico Sperimentale dell'Abruzzo e Molise "G. Caporale"                                                                          | Lorusso A, Marcacci M, Di Domenico M, Ancora M, Curini V, Di Lollo Valeria, Mangone I, Rinaldi A, Scialabba S, Caporale M, Di Pasquale A, Cammà C, Puglia I, Calistri P, Savini G                                                                                                                                                                                                                                                                                                                                                                                                              |
| EPI_ISL_1336897                                                                                                                                                                                                                                                                                                                                                                                                                                                                                                                                                                                                                    | SIESP CHIETI - DRIVE IN GISSI                                                                               | Istituto Zooprofilattico Sperimentale dell'Abruzzo e Molise "G. Caporale"                                                                          | Lorusso A, Marcacci M, Di Domenico M, Ancora M, Curini V, Di Lollo Valeria, Mangone I, Rinaldi A, Scialabba S, Caporale M, Di Pasquale A, Cammà C, Puglia I, Calistri P, Savini G                                                                                                                                                                                                                                                                                                                                                                                                              |
| EPI_ISL_1336915                                                                                                                                                                                                                                                                                                                                                                                                                                                                                                                                                                                                                    | SIESP CHIETI - DRIVE IN LANCIANO                                                                            | Istituto Zooprofilattico Sperimentale dell'Abruzzo e Molise "G. Caporale"                                                                          | Lorusso A, Marcacci M, Di Domenico M, Ancora M, Curini V, Di Lollo Valeria, Mangone I, Rinaldi A, Scialabba S, Caporale M, Di Pasquale A, Cammà C, Puglia I, Calistri P, Savini G                                                                                                                                                                                                                                                                                                                                                                                                              |
| EPI_ISL_1336982, EPI_ISL_1336984, EPI_ISL_1336988, EPI_ISL_1337002, EPI_ISL_1337004, EPI_ISL_1337007, EPI_ISL_1337013, EPI_ISL_1337022, EPI_ISL_1337041, EPI_ISL_1337067, EPI_ISL_1337081, EPI_ISL_1337105, EPI_ISL_1337106, EPI_ISL_1337132, EPI_ISL_1337134, EPI_ISL_1337155, EPI_ISL_1337179, EPI_ISL_1337186, EPI_ISL_1337213, EPI_ISL_1337243, EPI_ISL_1337256, EPI_ISL_1337272, EPI_ISL_1337298, EPI_ISL_1337335, EPI_ISL_1337341, EPI_ISL_1337398, EPI_ISL_1337434, EPI_ISL_1337437                                                                                                                                         | Helix/Illumina                                                                                              | Centers for Disease Control and Prevention Division of Viral Diseases, Pathogen Discovery                                                          | Peter W. Cook, Dakota Howard, Dhvani Batra, Ben L. Rambo-Martin, Eileen de Feo, Jan Antico, Christine Tran, Matthew Tolentino, Shannon Wickline, Kim Gietzen, Brad Sickler, Jingtao Liu, Eric Allen, Phil Febbo, Summer Galloway, Nicole L. Washington, Simon White, Geraint Levan, Kelly Schiabor Barrett, Elizabeth Cirulli, Alexandre Bolze, Ary Ascencio, Charlotte Rivera-Garcia, Ryan Cho, Jason Nguyen, Sherry Wang, Jimmy Ramirez, Tyler Cassens, Efen Sandoval, Magnus Isaksson, William Lee, David Becker, Marc Laurent, James Lu, Clinton R. Paden, Suxiang Tong, Duncan MacCannell |
| see above                                                                                                                                                                                                                                                                                                                                                                                                                                                                                                                                                                                                                          |                                                                                                             |                                                                                                                                                    |                                                                                                                                                                                                                                                                                                                                                                                                                                                                                                                                                                                                |
| EPI_ISL_1337474, EPI_ISL_1337490                                                                                                                                                                                                                                                                                                                                                                                                                                                                                                                                                                                                   | DOHMH Crown Heights                                                                                         | New York City Public Health Laboratory                                                                                                             | Jade Wang, et al.                                                                                                                                                                                                                                                                                                                                                                                                                                                                                                                                                                              |
| EPI_ISL_1337491                                                                                                                                                                                                                                                                                                                                                                                                                                                                                                                                                                                                                    | DOHMH Corona                                                                                                | New York City Public Health Laboratory                                                                                                             | Jade Wang, et al.                                                                                                                                                                                                                                                                                                                                                                                                                                                                                                                                                                              |
| EPI_ISL_1337497                                                                                                                                                                                                                                                                                                                                                                                                                                                                                                                                                                                                                    | DOHMH Jamaica                                                                                               | New York City Public Health Laboratory                                                                                                             | Jade Wang, et al.                                                                                                                                                                                                                                                                                                                                                                                                                                                                                                                                                                              |
| EPI_ISL_1337499                                                                                                                                                                                                                                                                                                                                                                                                                                                                                                                                                                                                                    | DOHMH Crown Heights                                                                                         | New York City Public Health Laboratory                                                                                                             | Jade Wang, et al.                                                                                                                                                                                                                                                                                                                                                                                                                                                                                                                                                                              |
| EPI_ISL_1337505                                                                                                                                                                                                                                                                                                                                                                                                                                                                                                                                                                                                                    | DOHMH Jamaica                                                                                               | New York City Public Health Laboratory                                                                                                             | Jade Wang, et al.                                                                                                                                                                                                                                                                                                                                                                                                                                                                                                                                                                              |
| EPI_ISL_1337506                                                                                                                                                                                                                                                                                                                                                                                                                                                                                                                                                                                                                    | DOHMH Morrisania                                                                                            | New York City Public Health Laboratory                                                                                                             | Jade Wang, et al.                                                                                                                                                                                                                                                                                                                                                                                                                                                                                                                                                                              |
| EPI_ISL_1338613                                                                                                                                                                                                                                                                                                                                                                                                                                                                                                                                                                                                                    | WSU Molecular Diagnostics Laboratory                                                                        | Kansas Health and Environmental Lab                                                                                                                | Mike Grose, Jonathan Barnell, Ben Olsen, and Phil Adam                                                                                                                                                                                                                                                                                                                                                                                                                                                                                                                                         |
| EPI_ISL_1340198, EPI_ISL_1340199, EPI_ISL_1340205, EPI_ISL_1340214, EPI_ISL_1340219, EPI_ISL_1340232, EPI_ISL_1340233                                                                                                                                                                                                                                                                                                                                                                                                                                                                                                              | NJDOH, Public Health and Environmental Laboratories                                                         | New Jersey Public Health and Environmental Laboratories (PHEL)                                                                                     | Lindsey Bodnar, Shiv K. Verma, Dana Woell, Byeong Jeong                                                                                                                                                                                                                                                                                                                                                                                                                                                                                                                                        |
| EPI_ISL_1340871                                                                                                                                                                                                                                                                                                                                                                                                                                                                                                                                                                                                                    | PHV-FSS                                                                                                     | PHV-FSS                                                                                                                                            | Son Nguyen                                                                                                                                                                                                                                                                                                                                                                                                                                                                                                                                                                                     |
| EPI_ISL_1340960, EPI_ISL_1340968, EPI_ISL_1341000, EPI_ISL_1341016, EPI_ISL_1341022, EPI_ISL_1341025, EPI_ISL_1341031, EPI_ISL_1341039, EPI_ISL_1341043, EPI_ISL_1341049, EPI_ISL_1341071, EPI_ISL_1341108                                                                                                                                                                                                                                                                                                                                                                                                                         |                                                                                                             |                                                                                                                                                    |                                                                                                                                                                                                                                                                                                                                                                                                                                                                                                                                                                                                |
| see above                                                                                                                                                                                                                                                                                                                                                                                                                                                                                                                                                                                                                          | 1. Główny Inspektorat Sanitarny; 2. Diagnostyka. Laboratoria Medyczne.                                      | 1. ViroGenetics - BSL3 Laboratory of Virology, Maopolska Centre of Biotechnology, Jagiellonian University; 2. Diagtron Laboratoria Lukasz Rabalski | Rabalski L., Gromowski T., Mazur-Panasiuk N., Kowalski M., Maciej Kosinski, Natalia Derewonko, Szulc P., Sylwia Januszczak, Labaj P.P., Pyrc K.                                                                                                                                                                                                                                                                                                                                                                                                                                                |
| EPI_ISL_1341356                                                                                                                                                                                                                                                                                                                                                                                                                                                                                                                                                                                                                    | UW Virology Lab                                                                                             | UW Virology Lab                                                                                                                                    | Pavitra Roychoudhury, Hong Xie, Lasata Shrestha, Shah Mohamed Bakhsh, Michelle Lin, Noah Baker, Sean Ellis, Saraswathi Sathees, Meei-Li Huang, Keith R. Jerome, Alexander Greninger                                                                                                                                                                                                                                                                                                                                                                                                            |
| EPI_ISL_1341933                                                                                                                                                                                                                                                                                                                                                                                                                                                                                                                                                                                                                    | Lighthouse Lab in Glasgow                                                                                   | Wellcome Sanger Institute for the COVID-19 Genomics UK (COG-UK) Consortium                                                                         | Harper VanSteenhouse, Yumi Kasai, David Gray, Carol Clugston, Anna Dominiczak and Alex Alderton, Roberto Amato, Jeffrey Barrett, Sonia Goncalves, Ewan Harrison, David K. Jackson, Ian Johnston, Dominic Kwiatkowski, Cordelia Langford, John Sillitoe on behalf of the Wellcome Sanger Institute COVID-19 Surveillance Team                                                                                                                                                                                                                                                                   |
| EPI_ISL_1342256, EPI_ISL_1342419, EPI_ISL_1342447, EPI_ISL_1342481, EPI_ISL_1342490, EPI_ISL_1342518, EPI_ISL_1342605                                                                                                                                                                                                                                                                                                                                                                                                                                                                                                              | Lighthouse Lab in Alderley Park                                                                             | Wellcome Sanger Institute for the COVID-19 Genomics UK (COG-UK) Consortium                                                                         | Jacquelyn Wynn, Mairead Hyland, The Lighthouse Lab in Alderley Park and Alex Alderton, Roberto Amato, Jeffrey Barrett, Sonia Goncalves, Ewan Harrison, David K. Jackson, Ian Johnston, Dominic Kwiatkowski, Cordelia Langford, John Sillitoe on behalf of the Wellcome Sanger Institute COVID-19 Surveillance Team                                                                                                                                                                                                                                                                             |
| EPI_ISL_1343796                                                                                                                                                                                                                                                                                                                                                                                                                                                                                                                                                                                                                    | Lighthouse Lab in Milton Keynes                                                                             | Wellcome Sanger Institute for the COVID-19 Genomics UK (COG-UK) Consortium                                                                         | The Lighthouse Lab in Milton Keynes and Alex Alderton, Roberto Amato, Jeffrey Barrett, Sonia Goncalves, Ewan Harrison, David K. Jackson, Ian Johnston, Dominic Kwiatkowski, Cordelia Langford, John Sillitoe on behalf of the Wellcome Sanger Institute COVID-19 Surveillance Team                                                                                                                                                                                                                                                                                                             |
| EPI_ISL_1344159                                                                                                                                                                                                                                                                                                                                                                                                                                                                                                                                                                                                                    | Lighthouse Lab in Glasgow                                                                                   | Wellcome Sanger Institute for the COVID-19 Genomics UK (COG-UK) Consortium                                                                         | Harper VanSteenhouse, Yumi Kasai, David Gray, Carol Clugston, Anna Dominiczak and Alex Alderton, Roberto Amato, Jeffrey Barrett, Sonia Goncalves, Ewan Harrison, David K. Jackson, Ian Johnston, Dominic Kwiatkowski, Cordelia Langford, John Sillitoe on behalf of the Wellcome Sanger Institute COVID-19 Surveillance Team                                                                                                                                                                                                                                                                   |
| EPI_ISL_1344582                                                                                                                                                                                                                                                                                                                                                                                                                                                                                                                                                                                                                    | Lighthouse Lab in Cambridge                                                                                 | Wellcome Sanger Institute for the COVID-19 Genomics UK (COG-UK) Consortium                                                                         | Rob Howes, The Lighthouse Lab in Cambridge and Alex Alderton, Roberto Amato, Jeffrey Barrett, Sonia Goncalves, Ewan Harrison, David K. Jackson, Ian Johnston, Dominic Kwiatkowski, Cordelia Langford, John Sillitoe on behalf of the Wellcome Sanger Institute COVID-19 Surveillance Team                                                                                                                                                                                                                                                                                                      |
| EPI_ISL_1344783                                                                                                                                                                                                                                                                                                                                                                                                                                                                                                                                                                                                                    | Randox Laboratories                                                                                         | Wellcome Sanger Institute for the COVID-19 Genomics UK (COG-UK) Consortium                                                                         | Randox Laboratories and Alex Alderton, Roberto Amato, Jeffrey Barrett, Sonia Goncalves, Ewan Harrison, David K. Jackson, Ian Johnston, Dominic Kwiatkowski, Cordelia Langford, John Sillitoe on behalf of the Wellcome Sanger Institute COVID-19 Surveillance Team                                                                                                                                                                                                                                                                                                                             |
| EPI_ISL_1344939                                                                                                                                                                                                                                                                                                                                                                                                                                                                                                                                                                                                                    | Lighthouse Lab in Glasgow                                                                                   | Wellcome Sanger Institute for the COVID-19 Genomics UK (COG-UK) Consortium                                                                         | Harper VanSteenhouse, Yumi Kasai, David Gray, Carol Clugston, Anna Dominiczak and Alex Alderton, Roberto Amato, Jeffrey Barrett, Sonia Goncalves, Ewan Harrison, David K. Jackson, Ian Johnston, Dominic Kwiatkowski, Cordelia Langford, John Sillitoe on behalf of the Wellcome Sanger Institute COVID-19 Surveillance Team                                                                                                                                                                                                                                                                   |
| EPI_ISL_1347015, EPI_ISL_1347073                                                                                                                                                                                                                                                                                                                                                                                                                                                                                                                                                                                                   | Microbiology Department, Laboratori Clínic Metropolitana Nord. Hospital Universitari Germans Trias i Pujol. | Can Ruti SARS-CoV-2 Sequencing Hub (HUGTPI/IRSI/CAIXA/IGTP)                                                                                        | Marc Noguera-Julian, Pilar Armengol, Ignacio Blanco, Antoni E Bordoy, Francesc Catala-Moll, Pere-Joan Cardona, Maria Casadellà, Cristina Casañ, Gemma Clara, Bonaventura Clotet, Cristina Esteban, Montserrat Giménez, Mercedes Guerrero, Mariona Parera, Verónica Saludes, Alba Sánchez, and Elisa Martró on behalf of the Can Ruti SARS-CoV-2 Sequencing Hub.                                                                                                                                                                                                                                |

|                                                                                                                                                                                                                                                               |                                                                                                                                                                                                                                                                                                                                                                                                                                                                                                                                                                                                                                                                                                                                                                                  |                                                                                                                                                                        |                                                                                                                                                                                                                                                                                                                                                                                                                                                                                                                                                                                                                                                                                                                                                                                                                                                                                                                                                                                                                                                                                                                                                        |
|---------------------------------------------------------------------------------------------------------------------------------------------------------------------------------------------------------------------------------------------------------------|----------------------------------------------------------------------------------------------------------------------------------------------------------------------------------------------------------------------------------------------------------------------------------------------------------------------------------------------------------------------------------------------------------------------------------------------------------------------------------------------------------------------------------------------------------------------------------------------------------------------------------------------------------------------------------------------------------------------------------------------------------------------------------|------------------------------------------------------------------------------------------------------------------------------------------------------------------------|--------------------------------------------------------------------------------------------------------------------------------------------------------------------------------------------------------------------------------------------------------------------------------------------------------------------------------------------------------------------------------------------------------------------------------------------------------------------------------------------------------------------------------------------------------------------------------------------------------------------------------------------------------------------------------------------------------------------------------------------------------------------------------------------------------------------------------------------------------------------------------------------------------------------------------------------------------------------------------------------------------------------------------------------------------------------------------------------------------------------------------------------------------|
| EPI_ISL_1357606                                                                                                                                                                                                                                               | QUALITY CONTROL CHEMICAL BIOLOGICAL RISK, AOOOR<br>Villa Sofia Cervello Palermo                                                                                                                                                                                                                                                                                                                                                                                                                                                                                                                                                                                                                                                                                                  | QUALITY CONTROL CHEMICAL BIOLOGICAL RISK, AOOOR<br>Villa Sofia Cervello Palermo                                                                                        | Di Gaudio, F., Contino, F., Brunacci, G.                                                                                                                                                                                                                                                                                                                                                                                                                                                                                                                                                                                                                                                                                                                                                                                                                                                                                                                                                                                                                                                                                                               |
| EPI_ISL_1357983                                                                                                                                                                                                                                               | National Virus Reference Laboratory                                                                                                                                                                                                                                                                                                                                                                                                                                                                                                                                                                                                                                                                                                                                              | National Virus Reference Laboratory                                                                                                                                    | Zoe Yandle, Charlene Bennet, Gabriel Gonzalez, Michael Carr, Jonathan Dean, Cillian F De Gascun                                                                                                                                                                                                                                                                                                                                                                                                                                                                                                                                                                                                                                                                                                                                                                                                                                                                                                                                                                                                                                                        |
| EPI_ISL_1358222                                                                                                                                                                                                                                               | National Virus Reference Laboratory                                                                                                                                                                                                                                                                                                                                                                                                                                                                                                                                                                                                                                                                                                                                              | National Virus Reference Laboratory                                                                                                                                    | Zoe Yandle, Charlene Bennett, Gabriel Gonzalez, Michael Carr, Jonathan Dean, Cillian F De Gascun                                                                                                                                                                                                                                                                                                                                                                                                                                                                                                                                                                                                                                                                                                                                                                                                                                                                                                                                                                                                                                                       |
| EPI_ISL_1358484, EPI_ISL_1358820                                                                                                                                                                                                                              | Israel Central Virology laboratory                                                                                                                                                                                                                                                                                                                                                                                                                                                                                                                                                                                                                                                                                                                                               | Israel National Consortium for SARS-CoV-2 sequencing                                                                                                                   | Neta Zuckerman, Efrat Dahan Bucris, Michal Mandelboim, Dana Bar-Ilan, Oran Erster, Tzvia Mann, Omer Murik, David A. Zeevi, Assaf Rokney, Joseph Jaffe, Eva Nachum, Maya Davidovich Cohen, Ephraim Fass, Gal Zizelski Valenci, Mor Rubinstein, Efrat Rorman, Israel Nissan, Efrat Glick-Saar, Omri Nayschool, Gideon Rechavi, Ella Mendelson, Orna Mor                                                                                                                                                                                                                                                                                                                                                                                                                                                                                                                                                                                                                                                                                                                                                                                                  |
| EPI_ISL_1358970, EPI_ISL_1359016                                                                                                                                                                                                                              | Vault Health                                                                                                                                                                                                                                                                                                                                                                                                                                                                                                                                                                                                                                                                                                                                                                     | Minnesota Department of Health, Public Health Laboratory                                                                                                               | Alexandra Lorentz, Jacob Garfin, Matt Plumb, and Xiong Wang                                                                                                                                                                                                                                                                                                                                                                                                                                                                                                                                                                                                                                                                                                                                                                                                                                                                                                                                                                                                                                                                                            |
| EPI_ISL_1359165                                                                                                                                                                                                                                               | ASL Napoli 1 Centro                                                                                                                                                                                                                                                                                                                                                                                                                                                                                                                                                                                                                                                                                                                                                              | AMES Centro Poliagnostico Strumentale S.r.l.                                                                                                                           | "Giovanni Savarese, Raffaella Ruggiero, Eloisa Evangelista, Antonella Di Carlo, Luisa Circelli, Luigi D'Amore, Nadia Petrillo, Monica Ianniello, Roberto Sirica, Maurizio D'Amora, Antonio Fico"                                                                                                                                                                                                                                                                                                                                                                                                                                                                                                                                                                                                                                                                                                                                                                                                                                                                                                                                                       |
| EPI_ISL_1359794                                                                                                                                                                                                                                               | ORIAPOLE SMDH                                                                                                                                                                                                                                                                                                                                                                                                                                                                                                                                                                                                                                                                                                                                                                    | CNR Virus des Infections Respiratoires - France SUD                                                                                                                    | Antonin Bal, Gregory Destras, Gwendolynne Burfin, Hadrien Regue, Quentin Semanas, Martine Valette, Bruno Lina, Laurence Josset                                                                                                                                                                                                                                                                                                                                                                                                                                                                                                                                                                                                                                                                                                                                                                                                                                                                                                                                                                                                                         |
| EPI_ISL_1359796                                                                                                                                                                                                                                               | BIOGROUP MOUANS SARTOUX                                                                                                                                                                                                                                                                                                                                                                                                                                                                                                                                                                                                                                                                                                                                                          | CNR Virus des Infections Respiratoires - France SUD                                                                                                                    | Antonin Bal, Gregory Destras, Gwendolynne Burfin, Hadrien Regue, Quentin Semanas, Martine Valette, Bruno Lina, Laurence Josset                                                                                                                                                                                                                                                                                                                                                                                                                                                                                                                                                                                                                                                                                                                                                                                                                                                                                                                                                                                                                         |
| EPI_ISL_1359805                                                                                                                                                                                                                                               | ORIAPOLE SMDH                                                                                                                                                                                                                                                                                                                                                                                                                                                                                                                                                                                                                                                                                                                                                                    | CNR Virus des Infections Respiratoires - France SUD                                                                                                                    | Antonin Bal, Gregory Destras, Gwendolynne Burfin, Hadrien Regue, Quentin Semanas, Martine Valette, Bruno Lina, Laurence Josset                                                                                                                                                                                                                                                                                                                                                                                                                                                                                                                                                                                                                                                                                                                                                                                                                                                                                                                                                                                                                         |
| EPI_ISL_1359829, EPI_ISL_1359835                                                                                                                                                                                                                              | BIOESTEREL BIOGROUP                                                                                                                                                                                                                                                                                                                                                                                                                                                                                                                                                                                                                                                                                                                                                              | CNR Virus des Infections Respiratoires - France SUD                                                                                                                    | Antonin Bal, Gregory Destras, Gwendolynne Burfin, Hadrien Regue, Quentin Semanas, Martine Valette, Bruno Lina, Laurence Josset                                                                                                                                                                                                                                                                                                                                                                                                                                                                                                                                                                                                                                                                                                                                                                                                                                                                                                                                                                                                                         |
| EPI_ISL_1359866                                                                                                                                                                                                                                               | BIOGROUP MOUANS SARTOUX                                                                                                                                                                                                                                                                                                                                                                                                                                                                                                                                                                                                                                                                                                                                                          | CNR Virus des Infections Respiratoires - France SUD                                                                                                                    | Antonin Bal, Gregory Destras, Gwendolynne Burfin, Hadrien Regue, Quentin Semanas, Martine Valette, Bruno Lina, Laurence Josset                                                                                                                                                                                                                                                                                                                                                                                                                                                                                                                                                                                                                                                                                                                                                                                                                                                                                                                                                                                                                         |
| EPI_ISL_1359958                                                                                                                                                                                                                                               | CENTRE HOSPITALIER EMILE ROUX                                                                                                                                                                                                                                                                                                                                                                                                                                                                                                                                                                                                                                                                                                                                                    | CNR Virus des Infections Respiratoires - France SUD                                                                                                                    | Antonin Bal, Gregory Destras, Gwendolynne Burfin, Hadrien Regue, Quentin Semanas, Martine Valette, Bruno Lina, Laurence Josset                                                                                                                                                                                                                                                                                                                                                                                                                                                                                                                                                                                                                                                                                                                                                                                                                                                                                                                                                                                                                         |
| EPI_ISL_1359964, EPI_ISL_1359968, EPI_ISL_1359971, EPI_ISL_1359977                                                                                                                                                                                            | HOPITAL UNIVERSITAIRE DE FORT DE FRANCE                                                                                                                                                                                                                                                                                                                                                                                                                                                                                                                                                                                                                                                                                                                                          | CNR Virus des Infections Respiratoires - France SUD                                                                                                                    | Antonin Bal, Gregory Destras, Gwendolynne Burfin, Hadrien Regue, Quentin Semanas, Martine Valette, Bruno Lina, Laurence Josset                                                                                                                                                                                                                                                                                                                                                                                                                                                                                                                                                                                                                                                                                                                                                                                                                                                                                                                                                                                                                         |
| EPI_ISL_1360139, EPI_ISL_1360208, EPI_ISL_1360276, EPI_ISL_1360286                                                                                                                                                                                            | Hospital Universitari Bellvitge                                                                                                                                                                                                                                                                                                                                                                                                                                                                                                                                                                                                                                                                                                                                                  | Microbiology Department                                                                                                                                                | Sara Marti, Aida Gonzalez-Diaz, Laura Calatayud, Jordi Niubó, Miguel Fernandez-Huerta, Carmen Ardanuy, Jordi Camara, M Angeles Dominguez                                                                                                                                                                                                                                                                                                                                                                                                                                                                                                                                                                                                                                                                                                                                                                                                                                                                                                                                                                                                               |
| EPI_ISL_1360513, EPI_ISL_1360858                                                                                                                                                                                                                              | Viollier AG                                                                                                                                                                                                                                                                                                                                                                                                                                                                                                                                                                                                                                                                                                                                                                      | Department of Biosystems Science and Engineering, ETH Zürich                                                                                                           | Christian Beisel, Sarah Nadeau, Chaoran Chen, Ivan Topolsky, Philipp Jablonski, Lara Fuhrmann, David Dreifuss, Katharina Jahn, Rebecca Denes, Mirjam Feldkamp, Ina Nissen, Natascha Santacroce, Elodie Burcklen, Christiane Beckmann, Maurice Redondo, Olivier Kobel, Christoph Noppen, Sophie Seidel, Noemie Santamaria de Souza, Niko Beerenwinkel, Tanja Stadler                                                                                                                                                                                                                                                                                                                                                                                                                                                                                                                                                                                                                                                                                                                                                                                    |
| EPI_ISL_1361547, EPI_ISL_1361602, EPI_ISL_1361624, EPI_ISL_1361625                                                                                                                                                                                            | 1.AO Universitaria 'S. Giovanni di Dio e Ruggi D'Aragona, Scuola Medica Salernitana' Hospital / 2.UOC di Virologia e Microbiologia, Università della Campania 'L. Vanvitelli' / 3.AO Universitaria 'Federico II' Napoli Hospital / 4.AORN 'San Giuseppe Moscati' Avellino Hospital / 5.AO 'San Pio - presidio G. Rummo' Benevento Hospital / 6.AO 'Sant'Anna e San Sebastiano' Caserta Hospital / 7.PO 'Maria Santissima Addolorata' Eboli Hospital / 8.Biogem Istituto di Ricerche Genetiche / 9. U.O.C. di Genetica Medica e di Laboratorio A.O.R.N., Azienda Ospedaliera di Rilievo Nazionale Antonio Cardarelli, Napoli / 10. Centro di riferimento Oncologico della Basilicata (IRCCS-CROB), Rionero in Vulture (PZ) / 11. Presidio Ospedaliero di Agropoli, Agropoli (SA). | 1. Genome Research Center for Health (CRGS) / 2. Laboratory of Molecular Medicine and Genomics(LMMGe) / 3. Center for Research in Pure and Applied Mathematics (CRMPA) | Giorgio Giurato (Corresponding Author), Francesca Rizzo (Corresponding Author), Alessandro Weisz (Corresponding Author), Gianluigi Franci, Giovanni Nassa, Pasquale Pagliano, Roberta Tarallo, Elena Alexandrova, Ylenia D'Agostino, Carlo Ferravante, Jessica Lamberti, Viola Melone, Domenico Memoli, Valeria Mirici Cappa, Domenico Palumbo, Giovanni Pecoraro, Assunta Sellitto, Oriana Strianese, Iliaria Terenzi, Giuseppe Fenza, Aniello Gentile, Antonello Saccomanno, Sonia Amabile, Teresa Rocco, Annamaria Salvati, Emilia Vaccaro, Massimiliano Galdiero, Michele Cennamo, Giuseppe Portella, Maria Grazia Foti, Mariarosaria Ingino, Maria Landi, Maurizio Fumi, Vincenzo Rocco, Rita Greco, Vittoria Letizia, Arnolfo Petruzzello, Maddalena Schioppa, Gregorio Goffredi, Francesca Marciano, Michele Caraglia, Alessia Cossu, Marianna Scrima, Edmondo Adorasio, Morena D'Avenia, Michela Iacobellis, Rosanna Piluscio, Giorgio Dirani, Vittorio Sambri, Simona Semprini, Silvia Zanoli, Francesco Curcio, Stefania Marzinotto, Andreina Baj, Fausto Sessa.                                                                             |
| EPI_ISL_1362979                                                                                                                                                                                                                                               | Missouri State Public Health Laboratory                                                                                                                                                                                                                                                                                                                                                                                                                                                                                                                                                                                                                                                                                                                                          | Missouri State Public Health Laboratory                                                                                                                                | Matthew Sinn, Joshua Barry, Ashley New                                                                                                                                                                                                                                                                                                                                                                                                                                                                                                                                                                                                                                                                                                                                                                                                                                                                                                                                                                                                                                                                                                                 |
| EPI_ISL_1363114                                                                                                                                                                                                                                               | Molecular diagnostic laboratory of Federal Budget Institution of Science 'Central Research Institute of Epidemiology' of The Federal Service on Customers' Rights Protection and Human Well-being Surveillance                                                                                                                                                                                                                                                                                                                                                                                                                                                                                                                                                                   | Group of Genomics and Postgenomic Technologies of Central Research Institute of Epidemiology                                                                           | Samoilov AE, Kaptelova VV, Korneenko EV, Valdokhina AV, Bulanenko VP, Saenko SS, Golubeva AG, Zotova MI, Berlina YY, Solovyeva ED, Shipulina OY, Speranskaya AS, Tivanova EV, Kondrasheva LY, Akimkin VG, Cherkashina AS                                                                                                                                                                                                                                                                                                                                                                                                                                                                                                                                                                                                                                                                                                                                                                                                                                                                                                                               |
| EPI_ISL_1363199                                                                                                                                                                                                                                               | UAB Diagnostikos laboratorija                                                                                                                                                                                                                                                                                                                                                                                                                                                                                                                                                                                                                                                                                                                                                    | Institute of Biotechnology, Life Sciences Center, Vilnius University                                                                                                   | Emilija Vasilunaitė, Milda Norkienė, Danguolė Ziogienė, Albertas Timinskas, Alma Gedvilaite                                                                                                                                                                                                                                                                                                                                                                                                                                                                                                                                                                                                                                                                                                                                                                                                                                                                                                                                                                                                                                                            |
| EPI_ISL_1363601, EPI_ISL_1363618                                                                                                                                                                                                                              | Sonora Quest Laboratories                                                                                                                                                                                                                                                                                                                                                                                                                                                                                                                                                                                                                                                                                                                                                        | TGen North                                                                                                                                                             | Jolene Bowers, Heather Centner, Chris French, Hayley Yaglom, Ashlyn Pfeiffer, Darrin Lemmer, Dave Engelthaler, The Arizona COVID Genomics Union (ACGU)                                                                                                                                                                                                                                                                                                                                                                                                                                                                                                                                                                                                                                                                                                                                                                                                                                                                                                                                                                                                 |
| EPI_ISL_1364866                                                                                                                                                                                                                                               | Kansas Health and Environmental Lab                                                                                                                                                                                                                                                                                                                                                                                                                                                                                                                                                                                                                                                                                                                                              | Kansas Health and Environmental Lab                                                                                                                                    | Mike Grose, Jonathan Barnell, Ben Olsen, and Phil Adam                                                                                                                                                                                                                                                                                                                                                                                                                                                                                                                                                                                                                                                                                                                                                                                                                                                                                                                                                                                                                                                                                                 |
| EPI_ISL_1365196, EPI_ISL_1365241                                                                                                                                                                                                                              | Randox Laboratories                                                                                                                                                                                                                                                                                                                                                                                                                                                                                                                                                                                                                                                                                                                                                              | Wellcome Sanger Institute for the COVID-19 Genomics UK (COG-UK) Consortium                                                                                             | Randox Laboratories and Alex Alderton, Roberto Amato, Jeffrey Barrett, Sonia Goncalves, Ewan Harrison, David K. Jackson, Ian Johnston, Dominic Kwiatkowski, Cordelia Langford, John Sillitoe on behalf of the Wellcome Sanger Institute COVID-19 Surveillance Team                                                                                                                                                                                                                                                                                                                                                                                                                                                                                                                                                                                                                                                                                                                                                                                                                                                                                     |
| EPI_ISL_1366296                                                                                                                                                                                                                                               | Sharp HealthCare Laboratory                                                                                                                                                                                                                                                                                                                                                                                                                                                                                                                                                                                                                                                                                                                                                      | Andersen lab at Scripps Research                                                                                                                                       | SEARCH Alliance San Diego with Aaron Harding, Jacquelyn Berumen, Cathy Woerle, Liam McGinnis, Art Mendoza, Omid Bakhtar                                                                                                                                                                                                                                                                                                                                                                                                                                                                                                                                                                                                                                                                                                                                                                                                                                                                                                                                                                                                                                |
| EPI_ISL_1366498                                                                                                                                                                                                                                               | 1.AO Universitaria 'S. Giovanni di Dio e Ruggi D'Aragona, Scuola Medica Salernitana' Hospital / 2.UOC di Virologia e Microbiologia, Università della Campania 'L. Vanvitelli' / 3.AO Universitaria 'Federico II' Napoli Hospital / 4.AORN 'San Giuseppe Moscati' Avellino Hospital / 5.AO 'San Pio - presidio G. Rummo' Benevento Hospital / 6.AO 'Sant'Anna e San Sebastiano' Caserta Hospital / 7.PO 'Maria Santissima Addolorata' Eboli Hospital / 8.Biogem Istituto di Ricerche Genetiche / 9. U.O.C. di Genetica Medica e di Laboratorio A.O.R.N., Azienda Ospedaliera di Rilievo Nazionale Antonio Cardarelli, Napoli / 10. Centro di riferimento Oncologico della Basilicata (IRCCS-CROB), Rionero in Vulture (PZ) / 11. Presidio Ospedaliero di Agropoli, Agropoli (SA). | 1. Genome Research Center for Health (CRGS) / 2. Laboratory of Molecular Medicine and Genomics(LMMGe) / 3. Center for Research in Pure and Applied Mathematics (CRMPA) | Giorgio Giurato, Francesca Rizzo, Alessandro Weisz, Gianluigi Franci, Giovanni Nassa, Pasquale Pagliano, Roberta Tarallo, Elena Alexandrova, Ylenia D'Agostino, Carlo Ferravante, Jessica Lamberti, Viola Melone, Domenico Memoli, Valeria Mirici Cappa, Domenico Palumbo, Giovanni Pecoraro, Assunta Sellitto, Oriana Strianese, Iliaria Terenzi, Giuseppe Fenza, Aniello Gentile, Antonello Saccomanno, Sonia Amabile, Teresa Rocco, Annamaria Salvati, Emilia Vaccaro, Massimiliano Galdiero, Michele Cennamo, Giuseppe Portella, Maria Grazia Foti, Mariarosaria Ingino, Maria Landi, Maurizio Fumi, Vincenzo Rocco, Rita Greco, Vittoria Letizia, Arnolfo Petruzzello, Maddalena Schioppa, Gregorio Goffredi, Francesca Marciano, Michele Caraglia, Alessia Cossu, Marianna Scrima, Edmondo Adorasio, Morena D'Avenia, Michela Iacobellis, Rosanna Piluscio, Giorgio Dirani, Vittorio Sambri, Simona Semprini, Silvia Zanoli, Francesco Curcio, Stefania Marzinotto, Andreina Baj, Fausto Sessa, Massimiliano Chetta, Marina Tarisano, Giusy Giordano, Marcello Ametrano, Mariano Fiorenza, Calvano Antonella, D'Auria Fiorella, De Luca Luciana. |
| EPI_ISL_1366751                                                                                                                                                                                                                                               | San Diego County Public Health Laboratory                                                                                                                                                                                                                                                                                                                                                                                                                                                                                                                                                                                                                                                                                                                                        | Andersen lab at Scripps Research                                                                                                                                       | SEARCH Alliance San Diego with Tracy Basler, Jovan Shephard, Brett Austin                                                                                                                                                                                                                                                                                                                                                                                                                                                                                                                                                                                                                                                                                                                                                                                                                                                                                                                                                                                                                                                                              |
| EPI_ISL_1367486                                                                                                                                                                                                                                               | Illinois Department of Public Health                                                                                                                                                                                                                                                                                                                                                                                                                                                                                                                                                                                                                                                                                                                                             | Gagnon Lab, Southern Illinois University                                                                                                                               | Keith Gagnon                                                                                                                                                                                                                                                                                                                                                                                                                                                                                                                                                                                                                                                                                                                                                                                                                                                                                                                                                                                                                                                                                                                                           |
| EPI_ISL_1367604, EPI_ISL_1367754                                                                                                                                                                                                                              | Michigan Department of Health and Human Services, Bureau of Laboratories                                                                                                                                                                                                                                                                                                                                                                                                                                                                                                                                                                                                                                                                                                         | Michigan Department of Health and Human Services, Bureau of Laboratories                                                                                               | Blankenship HM, Riner D, Soehnlén MK                                                                                                                                                                                                                                                                                                                                                                                                                                                                                                                                                                                                                                                                                                                                                                                                                                                                                                                                                                                                                                                                                                                   |
| EPI_ISL_1368046, EPI_ISL_1368100, EPI_ISL_1368118, EPI_ISL_1368158, EPI_ISL_1368323, EPI_ISL_1368366, EPI_ISL_1368446, EPI_ISL_1368542, EPI_ISL_1368600, EPI_ISL_1368714, EPI_ISL_1368732, EPI_ISL_1368745, EPI_ISL_1368768, EPI_ISL_1368835, EPI_ISL_1368912 | see above                                                                                                                                                                                                                                                                                                                                                                                                                                                                                                                                                                                                                                                                                                                                                                        | Public Health Ontario Laboratory                                                                                                                                       | Vanessa G Allen, Philip Banh, Yao Chen, Richard de Borja, Alireza Eshaghi, Nahuel Fittipaldi, Christine Frantz, Jonathan B Gubbay, Jennifer L Guthrie, Lawrence Heisler, Esha Joshi, Michael Laszloffy, Aimin Li, Michael CY Li, Dean Maxwell, Sandeep Nagra, Samir N Patel, Jared Simpson, Karthikeyan Sivaraman, Ashleigh Sullivan, Yogi Sundaravadanam, Sarah Teatero, Andre Villegas, Matthew Watson, Sandra Zittermann                                                                                                                                                                                                                                                                                                                                                                                                                                                                                                                                                                                                                                                                                                                            |
| EPI_ISL_1369165                                                                                                                                                                                                                                               | Lab voor klinische biologie                                                                                                                                                                                                                                                                                                                                                                                                                                                                                                                                                                                                                                                                                                                                                      | Lab voor klinische biologie                                                                                                                                            | Marija Janevska, Hannelore Hamerlinck, Bruno Verhasselt                                                                                                                                                                                                                                                                                                                                                                                                                                                                                                                                                                                                                                                                                                                                                                                                                                                                                                                                                                                                                                                                                                |
| EPI_ISL_1369174, EPI_ISL_1369184, EPI_ISL_1369199                                                                                                                                                                                                             | Centro de Investigación Biomédica de La Rioja - Hospital San Pedro Logroño                                                                                                                                                                                                                                                                                                                                                                                                                                                                                                                                                                                                                                                                                                       | SeqCOVID-SPAIN consortium/IBV(CSIC)                                                                                                                                    | María de Toro, José Manuel Azcona Gutiérrez, María Pilar Bea Escudero, Miriam Blasco Alberdi and SeqCOVID-SPAIN consortium                                                                                                                                                                                                                                                                                                                                                                                                                                                                                                                                                                                                                                                                                                                                                                                                                                                                                                                                                                                                                             |

|                                                                                                                                                                                                                                                                                                                                                                                                                                                                                                                                                                                                                                                                                                                                                                                                                                                                                                                                                      |                                                                                                                                  |                                                                                                                                                             |                                                                                                                                                                                                                                                                                                                              |                                                                                                                                                                                          |
|------------------------------------------------------------------------------------------------------------------------------------------------------------------------------------------------------------------------------------------------------------------------------------------------------------------------------------------------------------------------------------------------------------------------------------------------------------------------------------------------------------------------------------------------------------------------------------------------------------------------------------------------------------------------------------------------------------------------------------------------------------------------------------------------------------------------------------------------------------------------------------------------------------------------------------------------------|----------------------------------------------------------------------------------------------------------------------------------|-------------------------------------------------------------------------------------------------------------------------------------------------------------|------------------------------------------------------------------------------------------------------------------------------------------------------------------------------------------------------------------------------------------------------------------------------------------------------------------------------|------------------------------------------------------------------------------------------------------------------------------------------------------------------------------------------|
| EPI_ISL_1369390, EPI_ISL_1369407, EPI_ISL_1369456                                                                                                                                                                                                                                                                                                                                                                                                                                                                                                                                                                                                                                                                                                                                                                                                                                                                                                    | CHUV                                                                                                                             | Laboratory of genomics and metagenomics, Institute of Microbiology, University Hospital Centre and University of Lausanne, Switzerland                      | Trestan Pilonel, Damien Jacot, Sébastien Aeby, Gilbert Greub, Claire Bertelli                                                                                                                                                                                                                                                |                                                                                                                                                                                          |
| EPI_ISL_1369499, EPI_ISL_1369696                                                                                                                                                                                                                                                                                                                                                                                                                                                                                                                                                                                                                                                                                                                                                                                                                                                                                                                     | University Hospitals of Geneva, Laboratory of Virology                                                                           | HUG, Laboratory of Virology and the Health2030 Genome Center                                                                                                | Samuel Cordey, Ana Rita Goncalves, Laurent Kaiser, Lorenzo Cerutti, Henri Pegeot, Melyssa Elies, Deborah Penet, Keith Harshman, Ioannis Xenarios, Emmanouil Dermitzakis                                                                                                                                                      |                                                                                                                                                                                          |
| EPI_ISL_1369730, EPI_ISL_1369753                                                                                                                                                                                                                                                                                                                                                                                                                                                                                                                                                                                                                                                                                                                                                                                                                                                                                                                     | Dutch COVID-19 response team                                                                                                     | National Institute for Public Health and the Environment (RIVM)                                                                                             | Adam Meijer, Harry Vennema, Dirk Eggink, Jeroen Cremer, Sharon van den Brink, Bas van der Veer, AnneMarie van den Brandt, Florian Zwagemaker, Dennis Schmitz, Chantal Reusken, on behalf of the national COVID-19 response team                                                                                              |                                                                                                                                                                                          |
| EPI_ISL_1370104                                                                                                                                                                                                                                                                                                                                                                                                                                                                                                                                                                                                                                                                                                                                                                                                                                                                                                                                      | HIB                                                                                                                              | Laboratory of genomics and metagenomics, Institute of Microbiology, University Hospital Centre and University of Lausanne, Switzerland                      | Trestan Pilonel, Damien Jacot, Sébastien Aeby, Gilbert Greub, Claire Bertelli                                                                                                                                                                                                                                                |                                                                                                                                                                                          |
| EPI_ISL_1370113                                                                                                                                                                                                                                                                                                                                                                                                                                                                                                                                                                                                                                                                                                                                                                                                                                                                                                                                      | CHUV                                                                                                                             | Laboratory of genomics and metagenomics, Institute of Microbiology, University Hospital Centre and University of Lausanne, Switzerland                      | Trestan Pilonel, Damien Jacot, Sébastien Aeby, Gilbert Greub, Claire Bertelli                                                                                                                                                                                                                                                |                                                                                                                                                                                          |
| EPI_ISL_1371810, EPI_ISL_1371812                                                                                                                                                                                                                                                                                                                                                                                                                                                                                                                                                                                                                                                                                                                                                                                                                                                                                                                     | CENTRE HOSPITALIER INTERCOMMUNAL                                                                                                 | CNR Virus des Infections Respiratoires - France SUD                                                                                                         | Antonin Bal, Gregory Destras, Gwendolyne Burfin, Hadrien Regue, Quentin Semanas, Martine Valette, Bruno Lina, Laurence Josset                                                                                                                                                                                                |                                                                                                                                                                                          |
| EPI_ISL_1372123, EPI_ISL_1372208, EPI_ISL_1372499                                                                                                                                                                                                                                                                                                                                                                                                                                                                                                                                                                                                                                                                                                                                                                                                                                                                                                    | M Health Fairview                                                                                                                | Minnesota Department of Health, Public Health Laboratory                                                                                                    | Alexandra Lorentz, Jacob Garfin, Matt Plumb, and Xiong Wang                                                                                                                                                                                                                                                                  |                                                                                                                                                                                          |
| EPI_ISL_1372619                                                                                                                                                                                                                                                                                                                                                                                                                                                                                                                                                                                                                                                                                                                                                                                                                                                                                                                                      | Maine Health and Environmental Testing Laboratory                                                                                | Tewhey Lab, The Jackson Laboratory                                                                                                                          | Matluk,N., Dewey,H., Iosue,F., Barter,M., Lynch,R., Munger,H. and Tewhey,R.                                                                                                                                                                                                                                                  |                                                                                                                                                                                          |
| EPI_ISL_1372979                                                                                                                                                                                                                                                                                                                                                                                                                                                                                                                                                                                                                                                                                                                                                                                                                                                                                                                                      | US Air Force School of Aerospace Medicine                                                                                        | US Air Force School of Aerospace Medicine                                                                                                                   | Anthony Fries, Jennifer Meyer, William Gruner, William Buggele, Amanda Javorina, Sarah Purves, Clarise Starr, Elizabeth Macias                                                                                                                                                                                               |                                                                                                                                                                                          |
| EPI_ISL_1373371                                                                                                                                                                                                                                                                                                                                                                                                                                                                                                                                                                                                                                                                                                                                                                                                                                                                                                                                      | Imelda Hospital                                                                                                                  | Imelda Hospital                                                                                                                                             | Johan Frans, Dagmar Obbels, Hanne Valgaeren                                                                                                                                                                                                                                                                                  |                                                                                                                                                                                          |
| EPI_ISL_1373478, EPI_ISL_1373496                                                                                                                                                                                                                                                                                                                                                                                                                                                                                                                                                                                                                                                                                                                                                                                                                                                                                                                     | Clinical Molecular Microbiology Laboratory, UNC Hospitals                                                                        | Jeremy Wang                                                                                                                                                 | Jeremy Wang, Alexander Rubinsteyn, Colleen Rice, Jason Smedberg, Shawn Hawken, Melissa Miller, Corbin Jones, Robert Hagan                                                                                                                                                                                                    |                                                                                                                                                                                          |
| EPI_ISL_1373572                                                                                                                                                                                                                                                                                                                                                                                                                                                                                                                                                                                                                                                                                                                                                                                                                                                                                                                                      | Vault Health                                                                                                                     | Minnesota Department of Health, Public Health Laboratory                                                                                                    | Alexandra Lorentz, Jacob Garfin, Matt Plumb, and Xiong Wang                                                                                                                                                                                                                                                                  |                                                                                                                                                                                          |
| EPI_ISL_1373814, EPI_ISL_1373871                                                                                                                                                                                                                                                                                                                                                                                                                                                                                                                                                                                                                                                                                                                                                                                                                                                                                                                     | CDPH, Viral and Rickettsial Disease Laboratory                                                                                   | Genomics and Discovery, Respiratory Viruses Branch, Division of Viral Diseases, Centers for Disease Control and Prevention                                  | Ying Tao, Jing Zhang, Yan Li, Brian Lynch, Anna Kelleher, Krista Queen, Anna Uehara, Peter Cook, Han Jia Justin Ng, Clinton R. Paden, Haibin Wang, Suxiang Tong                                                                                                                                                              |                                                                                                                                                                                          |
| EPI_ISL_1373995, EPI_ISL_1374010                                                                                                                                                                                                                                                                                                                                                                                                                                                                                                                                                                                                                                                                                                                                                                                                                                                                                                                     | MO State Public Health Laboratory                                                                                                | Pathogen Discovery, Respiratory Viruses Branch, Division of Viral Diseases, Centers for Disease Control and Prevention                                      | Yan Li, Jing Zhang, Ying Tao, Brian Lynch, Anna Kelleher, Krista Queen, Anna Uehara, Peter Cook, Han Jia Justin Ng, Clinton R. Paden, Haibin Wang, Suxiang Tong                                                                                                                                                              |                                                                                                                                                                                          |
| EPI_ISL_1374109                                                                                                                                                                                                                                                                                                                                                                                                                                                                                                                                                                                                                                                                                                                                                                                                                                                                                                                                      | Randox Laboratories                                                                                                              | Wellcome Sanger Institute for the COVID-19 Genomics UK (COG-UK) Consortium                                                                                  | Randox Laboratories and Alex Alderton, Roberto Amato, Jeffrey Barrett, Sonia Goncalves, Ewan Harrison, David K. Jackson, Ian Johnston, Dominic Kwiatkowski, Cordelia Langford, John Sillitoe on behalf of the Wellcome Sanger Institute COVID-19 Surveillance Team                                                           |                                                                                                                                                                                          |
| EPI_ISL_1374493, EPI_ISL_1375602, EPI_ISL_1375609                                                                                                                                                                                                                                                                                                                                                                                                                                                                                                                                                                                                                                                                                                                                                                                                                                                                                                    | Lighthouse Lab in Alderley Park                                                                                                  | Wellcome Sanger Institute for the COVID-19 Genomics UK (COG-UK) Consortium                                                                                  | Jacquelyn Wynn, Mairead Hyland, The Lighthouse Lab in Alderley Park and Alex Alderton, Roberto Amato, Jeffrey Barrett, Sonia Goncalves, Ewan Harrison, David K. Jackson, Ian Johnston, Dominic Kwiatkowski, Cordelia Langford, John Sillitoe on behalf of the Wellcome Sanger Institute COVID-19 Surveillance Team           |                                                                                                                                                                                          |
| EPI_ISL_1375931, EPI_ISL_1375974, EPI_ISL_1376180, EPI_ISL_1377443                                                                                                                                                                                                                                                                                                                                                                                                                                                                                                                                                                                                                                                                                                                                                                                                                                                                                   | Lighthouse Lab in Glasgow                                                                                                        | Wellcome Sanger Institute for the COVID-19 Genomics UK (COG-UK) Consortium                                                                                  | Harper VanSteenhouse, Yumi Kasai, David Gray, Carol Clugston, Anna Dominiczak and Alex Alderton, Roberto Amato, Jeffrey Barrett, Sonia Goncalves, Ewan Harrison, David K. Jackson, Ian Johnston, Dominic Kwiatkowski, Cordelia Langford, John Sillitoe on behalf of the Wellcome Sanger Institute COVID-19 Surveillance Team |                                                                                                                                                                                          |
| EPI_ISL_1378673, EPI_ISL_1378674, EPI_ISL_1378675, EPI_ISL_1378676, EPI_ISL_1378677, EPI_ISL_1378678, EPI_ISL_1378679, EPI_ISL_1378680, EPI_ISL_1378681, EPI_ISL_1378682, EPI_ISL_1378683, EPI_ISL_1378684, EPI_ISL_1378685, EPI_ISL_1378686, EPI_ISL_1378688, EPI_ISL_1378689, EPI_ISL_1378690, EPI_ISL_1378691, EPI_ISL_1378692, EPI_ISL_1378693, EPI_ISL_1378697, EPI_ISL_1378698, EPI_ISL_1378699, EPI_ISL_1378700, EPI_ISL_1378701, EPI_ISL_1378702, EPI_ISL_1378703, EPI_ISL_1378704, EPI_ISL_1378705, EPI_ISL_1378706, EPI_ISL_1378707, EPI_ISL_1378708, EPI_ISL_1378710, EPI_ISL_1378711, EPI_ISL_1378712, EPI_ISL_1378713, EPI_ISL_1378714, EPI_ISL_1378715, EPI_ISL_1378716, EPI_ISL_1378718, EPI_ISL_1378719, EPI_ISL_1378723, EPI_ISL_1378733, EPI_ISL_1378735, EPI_ISL_1378737, EPI_ISL_1378743, EPI_ISL_1378754, EPI_ISL_1378755, EPI_ISL_1378756, EPI_ISL_1378757, EPI_ISL_1378758, EPI_ISL_1378759, EPI_ISL_1378760, EPI_ISL_1378761 | see above                                                                                                                        | Yale Clinical Virology Lab                                                                                                                                  | Grubaugh Lab - Yale School of Public Health                                                                                                                                                                                                                                                                                  | Joseph Fauver, Mallery Breban, Isabell Ott, Tara Alpert, Mary Petrone, Anderson Brito, Chantal Vogels, Annie Watkins, Chaney Kalinich, Jessica Rothman, Marie L. Landry, Nathan Grubaugh |
| EPI_ISL_1378814, EPI_ISL_1378815, EPI_ISL_1378817, EPI_ISL_1378819, EPI_ISL_1378820, EPI_ISL_1378821                                                                                                                                                                                                                                                                                                                                                                                                                                                                                                                                                                                                                                                                                                                                                                                                                                                 | Yale Pathology Lab                                                                                                               | Grubaugh Lab - Yale School of Public Health                                                                                                                 | Joseph Fauver, Mallery Breban, Isabell Ott, Tara Alpert, Mary Petrone, Anderson Brito, Chantal Vogels, Annie Watkins, Chaney Kalinich, Jessica Rothman, Jianhui Wang, Chen Liu, Pei Hui, Nathan Grubaugh                                                                                                                     |                                                                                                                                                                                          |
| EPI_ISL_1378830, EPI_ISL_1378831, EPI_ISL_1378832                                                                                                                                                                                                                                                                                                                                                                                                                                                                                                                                                                                                                                                                                                                                                                                                                                                                                                    | Grubaugh Lab - Yale School of Public Health                                                                                      | Grubaugh Lab - Yale School of Public Health                                                                                                                 | Joseph Fauver, Mallery Breban, Isabell Ott, Tara Alpert, Mary Petrone, Anderson Brito, Chantal Vogels, Annie Watkins, Chaney Kalinich, Jessica Rothman, Nathan Grubaugh                                                                                                                                                      |                                                                                                                                                                                          |
| EPI_ISL_1378833, EPI_ISL_1378841, EPI_ISL_1378842                                                                                                                                                                                                                                                                                                                                                                                                                                                                                                                                                                                                                                                                                                                                                                                                                                                                                                    | Instituto de Medicina Tropical & Salud Global Universidad Iberoamericana                                                         | Grubaugh Lab - Yale School of Public Health                                                                                                                 | Joseph Fauver, Mallery Breban, Isabell Ott, Tara Alpert, Mary Petrone, Anderson Brito, Chantal Vogels, Annie Watkins, Chaney Kalinich, Jessica Rothman, Robert Paulino-Ramirez, Alejandro Vallejo Degaudenzi, Victor Virgilio Calderon, Elisa Contreras, Esperanza Mendoza, Nathan Grubaugh                                  |                                                                                                                                                                                          |
| EPI_ISL_1378852, EPI_ISL_1378875, EPI_ISL_1378887, EPI_ISL_1378889                                                                                                                                                                                                                                                                                                                                                                                                                                                                                                                                                                                                                                                                                                                                                                                                                                                                                   | 1. Główny Inspektorat Sanitarny. 2. Diagnostyka. Laboratoria Medyczne.                                                           | 1. ViroGenetics - BSL3 Laboratory of Virology, Maopolska Centre of Biotechnology, Jagiellonian University; 2. genXone SA, Research & Development Laboratory | Mazur-Panasiuk,N., Grzegorz Nowicki, Gromowski,T., Natalia Drweska-Matelska, Jakub Grabowski, Anna Brylak, Aleksandra Gidlewicz, Karol Szeszko, Maciej Sykulski, ukasz Krych, Kowalski,M., Szulc,P., Sylwia Januszczyk, Labaj,P.P., Micha Kaszuba, Pyrc,K.                                                                   |                                                                                                                                                                                          |
| EPI_ISL_1379244, EPI_ISL_1379252, EPI_ISL_1379263                                                                                                                                                                                                                                                                                                                                                                                                                                                                                                                                                                                                                                                                                                                                                                                                                                                                                                    | NYP-WCM                                                                                                                          | New York Genome Center                                                                                                                                      | Michael Zody, Andre Corvelo, Dayna M. Oschwald, Samantha Fennessey, Tom Maniatis, Melissa Cushing, Olivier Elemento, Margaret Elizabeth Ross, Chris Mason, Priya Velu, Hanna Rennert, Arryn Craney, Lars F Westblade                                                                                                         |                                                                                                                                                                                          |
| EPI_ISL_1379272, EPI_ISL_1379293, EPI_ISL_1379310, EPI_ISL_1379314, EPI_ISL_1379316, EPI_ISL_1379317, EPI_ISL_1379333                                                                                                                                                                                                                                                                                                                                                                                                                                                                                                                                                                                                                                                                                                                                                                                                                                | Hacksack Meridian Health                                                                                                         | New York Genome Center                                                                                                                                      | Michael Zody, Andre Corvelo, Dayna M. Oschwald, Samantha Fennessey, Tom Maniatis, Liang Chen, Jose Mediavilla, Marcus Cunningham, Kaelea Composto, Kar Chow, David Perlin, Barry Kreiswirth                                                                                                                                  |                                                                                                                                                                                          |
| EPI_ISL_1379356, EPI_ISL_1379362                                                                                                                                                                                                                                                                                                                                                                                                                                                                                                                                                                                                                                                                                                                                                                                                                                                                                                                     | NYP-WCM                                                                                                                          | New York Genome Center                                                                                                                                      | Michael Zody, Andre Corvelo, Dayna M. Oschwald, Samantha Fennessey, Tom Maniatis, Melissa Cushing, Olivier Elemento, Margaret Elizabeth Ross, Chris Mason, Priya Velu, Hanna Rennert, Arryn Craney, Lars F Westblade                                                                                                         |                                                                                                                                                                                          |
| EPI_ISL_1379413                                                                                                                                                                                                                                                                                                                                                                                                                                                                                                                                                                                                                                                                                                                                                                                                                                                                                                                                      | AREA DE SALUD CORONADO                                                                                                           | Incienza, Instituto Costarricense de Investigación y Enseñanza en Nutrición y Salud                                                                         | Francisco Duarte, Hebleen Porras, Claudio Soto-Garita, Estela Cordero, Adriana Godínez & Melany Calderón                                                                                                                                                                                                                     |                                                                                                                                                                                          |
| EPI_ISL_1379431                                                                                                                                                                                                                                                                                                                                                                                                                                                                                                                                                                                                                                                                                                                                                                                                                                                                                                                                      | LABORATORIO CLINICO LABIN                                                                                                        | Incienza, Instituto Costarricense de Investigación y Enseñanza en Nutrición y Salud                                                                         | Francisco Duarte, Hebleen Porras, Claudio Soto-Garita, Estela Cordero, Adriana Godínez, Melany Calderón & Pei Ling Chan Ma                                                                                                                                                                                                   |                                                                                                                                                                                          |
| EPI_ISL_1379436                                                                                                                                                                                                                                                                                                                                                                                                                                                                                                                                                                                                                                                                                                                                                                                                                                                                                                                                      | Department of Molecular and Translational Medicine, Section of Microbiology, University of Brescia, ASST Spedali Civili, Brescia | Department of Molecular and Translational Medicine, Section of Microbiology, University of Brescia, ASST Spedali Civili, Brescia                            | Francesca Caccuri, Alberto Zani, Serena Messali, Anna Bertelli, Simona Fiorentini, Arnaldo Caruso                                                                                                                                                                                                                            |                                                                                                                                                                                          |
| EPI_ISL_1379975                                                                                                                                                                                                                                                                                                                                                                                                                                                                                                                                                                                                                                                                                                                                                                                                                                                                                                                                      | UCLA Clinical Micro Lab                                                                                                          | Los Angeles County PHL                                                                                                                                      | P. Hemarajata et al.                                                                                                                                                                                                                                                                                                         |                                                                                                                                                                                          |
| EPI_ISL_1381067                                                                                                                                                                                                                                                                                                                                                                                                                                                                                                                                                                                                                                                                                                                                                                                                                                                                                                                                      | LACEN do Mato Grosso do Sul                                                                                                      | Instituto Adolfo Lutz, Interdisciplinary Procedures Center, Strategic Laboratory                                                                            | Claudio Tavares Sacchi, Claudia Regina Gonçalves, Erica Valessa Ramos Gomes, Karoline Rodrigues Campos, Caio Vinicius Dias Lopes                                                                                                                                                                                             |                                                                                                                                                                                          |
| EPI_ISL_1381076                                                                                                                                                                                                                                                                                                                                                                                                                                                                                                                                                                                                                                                                                                                                                                                                                                                                                                                                      | Hospital                                                                                                                         | National Reference Center for Viruses of Respiratory Infections, Institut Pasteur, Paris                                                                    | Marion Barbet, Sylvie Behillil, Méline Bizard, Angela Brisebarre, Camille Capel, Louise Lefrançois, Etienne Simon-Lorière, Vincent Enouf, Maud Vanpeene, Sylvie van der Werf, Gastli Nabil                                                                                                                                   |                                                                                                                                                                                          |
| EPI_ISL_1381163                                                                                                                                                                                                                                                                                                                                                                                                                                                                                                                                                                                                                                                                                                                                                                                                                                                                                                                                      | Hospital                                                                                                                         | National Reference Center for Viruses of Respiratory                                                                                                        | Marion Barbet, Sylvie Behillil, Méline Bizard, Angela Brisebarre, Camille Capel, Louise Lefrançois, Etienne Simon-Lorière, Vincent Enouf, Maud Vanpeene,                                                                                                                                                                     |                                                                                                                                                                                          |

|                                                                                                                                                                                                                                                                                                                                                                                                                                                                                                                                                                                                                                                                                                                                                                                                                                                                                                                                                                                                                                                                                                                                                                                                                                                                                                                                                                                                                                                                                                                                                                         |                                                                                                                  |                                                                                                                                 |                                                                                                                                                                                                                                                                                                                                                                                          |
|-------------------------------------------------------------------------------------------------------------------------------------------------------------------------------------------------------------------------------------------------------------------------------------------------------------------------------------------------------------------------------------------------------------------------------------------------------------------------------------------------------------------------------------------------------------------------------------------------------------------------------------------------------------------------------------------------------------------------------------------------------------------------------------------------------------------------------------------------------------------------------------------------------------------------------------------------------------------------------------------------------------------------------------------------------------------------------------------------------------------------------------------------------------------------------------------------------------------------------------------------------------------------------------------------------------------------------------------------------------------------------------------------------------------------------------------------------------------------------------------------------------------------------------------------------------------------|------------------------------------------------------------------------------------------------------------------|---------------------------------------------------------------------------------------------------------------------------------|------------------------------------------------------------------------------------------------------------------------------------------------------------------------------------------------------------------------------------------------------------------------------------------------------------------------------------------------------------------------------------------|
| EPI_ISL_1381201                                                                                                                                                                                                                                                                                                                                                                                                                                                                                                                                                                                                                                                                                                                                                                                                                                                                                                                                                                                                                                                                                                                                                                                                                                                                                                                                                                                                                                                                                                                                                         | Hospital                                                                                                         | Infections, Institut Pasteur, Paris<br>National Reference Center for Viruses of Respiratory Infections, Institut Pasteur, Paris | Sylvie van der Werf,Bastian Sylvaïne<br>Marion Barbet, Sylvie Behillil, Méline Bizard, Angela Brisebarre, Camille Capel, Louise Lefrançois, Etienne Simon-Lorière, Vincent Enouf, Maud Vanpeene, Sylvie van der Werf,Bressollette CéLine                                                                                                                                                 |
| EPI_ISL_1381209                                                                                                                                                                                                                                                                                                                                                                                                                                                                                                                                                                                                                                                                                                                                                                                                                                                                                                                                                                                                                                                                                                                                                                                                                                                                                                                                                                                                                                                                                                                                                         | Sentinelles Province                                                                                             | National Reference Center for Viruses of Respiratory Infections, Institut Pasteur, Paris                                        | Marion Barbet, Sylvie Behillil, Méline Bizard, Angela Brisebarre, Camille Capel, Louise Lefrançois, Etienne Simon-Lorière, Vincent Enouf, Maud Vanpeene, Sylvie van der Werf,Lefevre StéPhane                                                                                                                                                                                            |
| EPI_ISL_1381285                                                                                                                                                                                                                                                                                                                                                                                                                                                                                                                                                                                                                                                                                                                                                                                                                                                                                                                                                                                                                                                                                                                                                                                                                                                                                                                                                                                                                                                                                                                                                         | Laboratoire Hospitalier Universitaire de Bruxelles (LHUB-ULB)                                                    | UAntwerp, Laboratory of Medical Microbiology                                                                                    | Basil Britto Xavier, Jasmine Coppens, Marie Le Mercier, Christine Lammens, Veerle Matheeußen, Herman Goossens                                                                                                                                                                                                                                                                            |
| EPI_ISL_1381300, EPI_ISL_1381301, EPI_ISL_1381302, EPI_ISL_1381303                                                                                                                                                                                                                                                                                                                                                                                                                                                                                                                                                                                                                                                                                                                                                                                                                                                                                                                                                                                                                                                                                                                                                                                                                                                                                                                                                                                                                                                                                                      | Omics Sciences Laboratory                                                                                        | Omics Sciences Laboratory                                                                                                       | Derly Andrade Molina, Rubén Armas González, Gabriel Morey León, Darlyn Amaya, Katheryn Sacheri Viteri, Emily Sulay Saltos Montalvo, Paula Juliana Gavilanes Jarrin, Juan Carlos Fernández Cadena                                                                                                                                                                                         |
| EPI_ISL_1381313, EPI_ISL_1381314, EPI_ISL_1381319, EPI_ISL_1381323, EPI_ISL_1381326, EPI_ISL_1381327, EPI_ISL_1381330, EPI_ISL_1381340, EPI_ISL_1381342, EPI_ISL_1381347, EPI_ISL_1381350, EPI_ISL_1381353, EPI_ISL_1381359, EPI_ISL_1381360, EPI_ISL_1381361, EPI_ISL_1381364, EPI_ISL_1381366, EPI_ISL_1381368, EPI_ISL_1381375, EPI_ISL_1381376, EPI_ISL_1381380, EPI_ISL_1381382, EPI_ISL_1381385                                                                                                                                                                                                                                                                                                                                                                                                                                                                                                                                                                                                                                                                                                                                                                                                                                                                                                                                                                                                                                                                                                                                                                   |                                                                                                                  |                                                                                                                                 |                                                                                                                                                                                                                                                                                                                                                                                          |
| see above                                                                                                                                                                                                                                                                                                                                                                                                                                                                                                                                                                                                                                                                                                                                                                                                                                                                                                                                                                                                                                                                                                                                                                                                                                                                                                                                                                                                                                                                                                                                                               | Laboratory for Respiratory Viruses, Cantacuzino National Military-Medical Institute for Research and Development | Cantacuzino Institute Virology                                                                                                  | Luiza Ustea, Nicoleta Paraschiv, Catalina Pascu, Sorin Dinu, Mihaela Lazar                                                                                                                                                                                                                                                                                                               |
| EPI_ISL_1381386                                                                                                                                                                                                                                                                                                                                                                                                                                                                                                                                                                                                                                                                                                                                                                                                                                                                                                                                                                                                                                                                                                                                                                                                                                                                                                                                                                                                                                                                                                                                                         | Centers for Disease Control, R.O.C. (Taiwan)                                                                     | Centers for Disease Control, R.O.C. (Taiwan)                                                                                    | Ji-Rong Yang, Yu-Chi Lin, Jung-Jung Mu, Ming-Tsan Liu                                                                                                                                                                                                                                                                                                                                    |
| EPI_ISL_1381867                                                                                                                                                                                                                                                                                                                                                                                                                                                                                                                                                                                                                                                                                                                                                                                                                                                                                                                                                                                                                                                                                                                                                                                                                                                                                                                                                                                                                                                                                                                                                         | Hospital General Universitario Gregorio Marañón                                                                  | Hospital General Universitario Gregorio Marañón                                                                                 | Sergio Buenestado Serrano, Pedro Sola Campoy, Laura Pérez-Lago, Cristina Rodríguez-Grande, Pilar Catalán, Patricia Muñoz, Darío García de Viedma                                                                                                                                                                                                                                         |
| EPI_ISL_1381919                                                                                                                                                                                                                                                                                                                                                                                                                                                                                                                                                                                                                                                                                                                                                                                                                                                                                                                                                                                                                                                                                                                                                                                                                                                                                                                                                                                                                                                                                                                                                         | Virginia Division of Consolidated Laboratory Services                                                            | Virginia Division of Consolidated Laboratory Services                                                                           | Virginia DCLS                                                                                                                                                                                                                                                                                                                                                                            |
| EPI_ISL_1381984                                                                                                                                                                                                                                                                                                                                                                                                                                                                                                                                                                                                                                                                                                                                                                                                                                                                                                                                                                                                                                                                                                                                                                                                                                                                                                                                                                                                                                                                                                                                                         | University of Liège COVID-19 testing center                                                                      | GIGA Medical Genomics                                                                                                           | Keith Durkin, Maria Artesi, Sébastien Bonterm, Raphaël Boreux, Bouchra Boujemla, Nathalie Renotte, Cécile Meex, Pierrette Melin, Marie-Pierre Hayette, Vincent Bours                                                                                                                                                                                                                     |
| EPI_ISL_1382140, EPI_ISL_1382142                                                                                                                                                                                                                                                                                                                                                                                                                                                                                                                                                                                                                                                                                                                                                                                                                                                                                                                                                                                                                                                                                                                                                                                                                                                                                                                                                                                                                                                                                                                                        | Gundersen Clinical Microbiology Laboratory                                                                       | Kabara Cancer Research Institute                                                                                                | Craig S. Richmond, Paraic A. Kenny                                                                                                                                                                                                                                                                                                                                                       |
| EPI_ISL_1382366, EPI_ISL_1382384, EPI_ISL_1382868                                                                                                                                                                                                                                                                                                                                                                                                                                                                                                                                                                                                                                                                                                                                                                                                                                                                                                                                                                                                                                                                                                                                                                                                                                                                                                                                                                                                                                                                                                                       | KU Leuven, Rega Institute, Clinical and Epidemiological Virology                                                 | KU Leuven, Rega Institute, Clinical and Epidemiological Virology                                                                | Tony Wawina-Bokalanga, Bert Vanmechelen, Joan Martí-Carerras, Piet Maes                                                                                                                                                                                                                                                                                                                  |
| EPI_ISL_1383364, EPI_ISL_1383446, EPI_ISL_1383565, EPI_ISL_1383703, EPI_ISL_1383806                                                                                                                                                                                                                                                                                                                                                                                                                                                                                                                                                                                                                                                                                                                                                                                                                                                                                                                                                                                                                                                                                                                                                                                                                                                                                                                                                                                                                                                                                     | Laboratoire national de sante, Microbiology, Virology                                                            | Laboratoire national de sante, Microbiology, Microbial Genomics Platform                                                        | Anke Wienecke-Baldacchino, Catherine Ragimbeau,Jessica Tapp, Fatu Djabi, Lise Pignon, Raoul Salmon, Trung Nguyen Nguyen, Tamir Abdelrahman                                                                                                                                                                                                                                               |
| EPI_ISL_1383833, EPI_ISL_1383877, EPI_ISL_1383938                                                                                                                                                                                                                                                                                                                                                                                                                                                                                                                                                                                                                                                                                                                                                                                                                                                                                                                                                                                                                                                                                                                                                                                                                                                                                                                                                                                                                                                                                                                       | Hospital Center Emile Mayrisch                                                                                   | Laboratoire national de sante, Microbiology, Microbial Genomics Platform                                                        | Anke Wienecke-Baldacchino, Catherine Ragimbeau,Jessica Tapp, Fatu Djabi, Lise Pignon, Raoul Salmon, Cynthia Oxacelay, Tamir Abdelrahman                                                                                                                                                                                                                                                  |
| EPI_ISL_1384455, EPI_ISL_1384499, EPI_ISL_1384535                                                                                                                                                                                                                                                                                                                                                                                                                                                                                                                                                                                                                                                                                                                                                                                                                                                                                                                                                                                                                                                                                                                                                                                                                                                                                                                                                                                                                                                                                                                       | Laboratoires d'analyses medicales - Ketterhill                                                                   | Laboratoire national de sante, Microbiology, Microbial Genomics Platform                                                        | Anke Wienecke-Baldacchino, Catherine Ragimbeau,Jessica Tapp, Fatu Djabi, Lise Pignon, Raoul Salmon, Serge Vedy, Caroline Scheiber, Tamir Abdelrahman                                                                                                                                                                                                                                     |
| EPI_ISL_1384599                                                                                                                                                                                                                                                                                                                                                                                                                                                                                                                                                                                                                                                                                                                                                                                                                                                                                                                                                                                                                                                                                                                                                                                                                                                                                                                                                                                                                                                                                                                                                         | Laboratoires Reunis                                                                                              | Laboratoire national de sante, Microbiology, Microbial Genomics Platform                                                        | Anke Wienecke-Baldacchino, Catherine Ragimbeau,Jessica Tapp, Fatu Djabi, Lise Pignon, Raoul Salmon, Bernard Weber, Tamir Abdelrahman                                                                                                                                                                                                                                                     |
| EPI_ISL_1384855, EPI_ISL_1384856, EPI_ISL_1384869, EPI_ISL_1384871                                                                                                                                                                                                                                                                                                                                                                                                                                                                                                                                                                                                                                                                                                                                                                                                                                                                                                                                                                                                                                                                                                                                                                                                                                                                                                                                                                                                                                                                                                      | National Centre For Cell Science                                                                                 | National Centre For Cell Science - INSACOG                                                                                      | Dhiraj Paul, Mittali Inamdar, Sonal Manik Chavan, Mohak P Gujare, Shivang P. Bhanushali, Manoj Kumar Bhat, Ajay Pillai, INSACOG Consortium team, Yogesh Shouche.                                                                                                                                                                                                                         |
| EPI_ISL_1384887, EPI_ISL_1384889, EPI_ISL_1384902, EPI_ISL_1384913, EPI_ISL_1384915, EPI_ISL_1384917, EPI_ISL_1384923, EPI_ISL_1384935, EPI_ISL_1384970, EPI_ISL_1384972, EPI_ISL_1384984, EPI_ISL_1384992, EPI_ISL_1385035, EPI_ISL_1385038, EPI_ISL_1385046, EPI_ISL_1385048, EPI_ISL_1385049, EPI_ISL_1385122, EPI_ISL_1385134, EPI_ISL_1385141, EPI_ISL_1385151, EPI_ISL_1385153, EPI_ISL_1385170, EPI_ISL_1385175, EPI_ISL_1385208, EPI_ISL_1385214, EPI_ISL_1385215, EPI_ISL_1385217, EPI_ISL_1385225, EPI_ISL_1385238, EPI_ISL_1385246, EPI_ISL_1385247, EPI_ISL_1385252, EPI_ISL_1385260, EPI_ISL_1385262, EPI_ISL_1385263, EPI_ISL_1385287, EPI_ISL_1385288, EPI_ISL_1385295, EPI_ISL_1385311, EPI_ISL_1385314, EPI_ISL_1385330, EPI_ISL_1385334, EPI_ISL_1385338, EPI_ISL_1385339, EPI_ISL_1385344, EPI_ISL_1385345, EPI_ISL_1385358, EPI_ISL_1385388, EPI_ISL_1385398, EPI_ISL_1385406, EPI_ISL_1385409, EPI_ISL_1385411, EPI_ISL_1385418, EPI_ISL_1385437, EPI_ISL_1385438, EPI_ISL_1385444, EPI_ISL_1385450, EPI_ISL_1385459, EPI_ISL_1385460, EPI_ISL_1385488, EPI_ISL_1385498, EPI_ISL_1385506, EPI_ISL_1385513, EPI_ISL_1385516, EPI_ISL_1385519, EPI_ISL_1385524, EPI_ISL_1385526, EPI_ISL_1385538, EPI_ISL_1385543, EPI_ISL_1385555, EPI_ISL_1385578, EPI_ISL_1385600, EPI_ISL_1385611, EPI_ISL_1385618, EPI_ISL_1385627, EPI_ISL_1385635, EPI_ISL_1385639, EPI_ISL_1385645, EPI_ISL_1385682, EPI_ISL_1385690, EPI_ISL_1385705, EPI_ISL_1385716, EPI_ISL_1385732, EPI_ISL_1385734, EPI_ISL_1385749, EPI_ISL_1385759, EPI_ISL_1385762, EPI_ISL_1385767 |                                                                                                                  |                                                                                                                                 |                                                                                                                                                                                                                                                                                                                                                                                          |
| see above                                                                                                                                                                                                                                                                                                                                                                                                                                                                                                                                                                                                                                                                                                                                                                                                                                                                                                                                                                                                                                                                                                                                                                                                                                                                                                                                                                                                                                                                                                                                                               | Pandemic Response Lab - NYC                                                                                      | Pandemic Response Lab, R&D                                                                                                      | Henry Lee, Michael Hammerling, Melissa Hopkins, Cybill del Castillo, Shinyoung Clair Kang, William Ward, Pradeep Bugga, Sol Rey, Dylan Law, Haiping Hao, Jon Laurent                                                                                                                                                                                                                     |
| EPI_ISL_1385804                                                                                                                                                                                                                                                                                                                                                                                                                                                                                                                                                                                                                                                                                                                                                                                                                                                                                                                                                                                                                                                                                                                                                                                                                                                                                                                                                                                                                                                                                                                                                         | Alfa Diagnostica, Republic of Moldova                                                                            | ONCOGENE LLC                                                                                                                    | ONCOGENE LLC                                                                                                                                                                                                                                                                                                                                                                             |
| EPI_ISL_1385807, EPI_ISL_1385811                                                                                                                                                                                                                                                                                                                                                                                                                                                                                                                                                                                                                                                                                                                                                                                                                                                                                                                                                                                                                                                                                                                                                                                                                                                                                                                                                                                                                                                                                                                                        | Alfa Diagnostica LLC                                                                                             | ONCOGENE LLC                                                                                                                    | ONCOGENE LLC                                                                                                                                                                                                                                                                                                                                                                             |
| EPI_ISL_1386004                                                                                                                                                                                                                                                                                                                                                                                                                                                                                                                                                                                                                                                                                                                                                                                                                                                                                                                                                                                                                                                                                                                                                                                                                                                                                                                                                                                                                                                                                                                                                         | Microbiology Department, Laboratori Clinic Metropolitana Nord. Hospital Universitari Germans Trias i Pujol.      | Can Ruti SARS-CoV-2 Sequencing Hub (HUGTIP/IrsiCaixa/IGTP)                                                                      | Marc Noguera-Julian, Pilar Armengol, Ignacio Blanco, Antoni E Bordoy, Francesc Catala-Moll, Pere-Joan Cardona, Maria Casadellà, Cristina Casañ, Gemma Clara, Bonaventura Clotet, Cristina Esteban, Montserrat Giménez, Mercedes Guerrero, Anna Not, Roger Paredes, Mariona Parera, Verónica Saludes, Alba Sánchez, and Elisa Martró on behalf of the Can Ruti SARS-CoV-2 Sequencing Hub. |
| EPI_ISL_1386025                                                                                                                                                                                                                                                                                                                                                                                                                                                                                                                                                                                                                                                                                                                                                                                                                                                                                                                                                                                                                                                                                                                                                                                                                                                                                                                                                                                                                                                                                                                                                         | Ministry of Health Turkey                                                                                        | Ministry of Health Turkey                                                                                                       | Fatma Bayraktar, Yasemin Cogun, Süleyman Yalcin, Gülay Korukluolu                                                                                                                                                                                                                                                                                                                        |
| EPI_ISL_1386026                                                                                                                                                                                                                                                                                                                                                                                                                                                                                                                                                                                                                                                                                                                                                                                                                                                                                                                                                                                                                                                                                                                                                                                                                                                                                                                                                                                                                                                                                                                                                         | Microbiology Department, Laboratori Clinic Metropolitana Nord. Hospital Universitari Germans Trias i Pujol.      | Can Ruti SARS-CoV-2 Sequencing Hub (HUGTIP/IrsiCaixa/IGTP)                                                                      | Marc Noguera-Julian, Pilar Armengol, Ignacio Blanco, Antoni E Bordoy, Francesc Catala-Moll, Pere-Joan Cardona, Maria Casadellà, Cristina Casañ, Gemma Clara, Bonaventura Clotet, Cristina Esteban, Montserrat Giménez, Mercedes Guerrero, Anna Not, Roger Paredes, Mariona Parera, Verónica Saludes, Alba Sánchez, and Elisa Martró on behalf of the Can Ruti SARS-CoV-2 Sequencing Hub. |
| EPI_ISL_1386027                                                                                                                                                                                                                                                                                                                                                                                                                                                                                                                                                                                                                                                                                                                                                                                                                                                                                                                                                                                                                                                                                                                                                                                                                                                                                                                                                                                                                                                                                                                                                         | Ministry of Health Turkey                                                                                        | Ministry of Health Turkey                                                                                                       | Fatma Bayraktar, Yasemin Cogun, Süleyman Yalcin, Gülay Korukluolu                                                                                                                                                                                                                                                                                                                        |
| EPI_ISL_1386040, EPI_ISL_1386083                                                                                                                                                                                                                                                                                                                                                                                                                                                                                                                                                                                                                                                                                                                                                                                                                                                                                                                                                                                                                                                                                                                                                                                                                                                                                                                                                                                                                                                                                                                                        | Microbiology Department, Laboratori Clinic Metropolitana Nord. Hospital Universitari Germans Trias i Pujol.      | Can Ruti SARS-CoV-2 Sequencing Hub (HUGTIP/IrsiCaixa/IGTP)                                                                      | Marc Noguera-Julian, Pilar Armengol, Ignacio Blanco, Antoni E Bordoy, Francesc Catala-Moll, Pere-Joan Cardona, Maria Casadellà, Cristina Casañ, Gemma Clara, Bonaventura Clotet, Cristina Esteban, Montserrat Giménez, Mercedes Guerrero, Anna Not, Roger Paredes, Mariona Parera, Verónica Saludes, Alba Sánchez, and Elisa Martró on behalf of the Can Ruti SARS-CoV-2 Sequencing Hub. |
| EPI_ISL_1387509                                                                                                                                                                                                                                                                                                                                                                                                                                                                                                                                                                                                                                                                                                                                                                                                                                                                                                                                                                                                                                                                                                                                                                                                                                                                                                                                                                                                                                                                                                                                                         | Originating lab: Wales Specialist Virology Centre Sequencing lab: Pathogen Genomics Unit                         | Public Health Wales Microbiology Cardiff Wales Specialist Virology Centre                                                       | Catherine Moore, Johnathan Evans, Laura Gifford, Malorie Perry, Simon Cottrell, Angela Marchbank, Alec Birchley, Alexander Adams, Amy Gaskin, Bree Gatca-Wilcox, Jason Coombes, Joel Southgate, Lauren Gilbert, Lee Graham, Nicole Pacchiarini, Sara Kumziene-Summerhayes, Sarah Taylor, Sophie Jones, Sara Rey, Matthew Bull, Joanne Watkins, Sally Corden, Tom Connor                  |
| EPI_ISL_1389181, EPI_ISL_1389213                                                                                                                                                                                                                                                                                                                                                                                                                                                                                                                                                                                                                                                                                                                                                                                                                                                                                                                                                                                                                                                                                                                                                                                                                                                                                                                                                                                                                                                                                                                                        | Labo Analyses Med                                                                                                | National Reference Center for Viruses of Respiratory Infections, Institut Pasteur, Paris                                        | Marion Barbet, Sylvie Behillil, Méline Bizard, Angela Brisebarre, Camille Capel, Louise Lefrançois, Etienne Simon-Lorière, Vincent Enouf, Maud Vanpeene, Sylvie van der Werf,Pichard Ronan                                                                                                                                                                                               |
| EPI_ISL_1389258                                                                                                                                                                                                                                                                                                                                                                                                                                                                                                                                                                                                                                                                                                                                                                                                                                                                                                                                                                                                                                                                                                                                                                                                                                                                                                                                                                                                                                                                                                                                                         | Labo Analyses Med                                                                                                | National Reference Center for Viruses of Respiratory Infections, Institut Pasteur, Paris                                        | Marion Barbet, Sylvie Behillil, Méline Bizard, Angela Brisebarre, Camille Capel, Louise Lefrançois, Etienne Simon-Lorière, Vincent Enouf, Maud Vanpeene, Sylvie van der Werf,Felloni Claire                                                                                                                                                                                              |
| EPI_ISL_1389574                                                                                                                                                                                                                                                                                                                                                                                                                                                                                                                                                                                                                                                                                                                                                                                                                                                                                                                                                                                                                                                                                                                                                                                                                                                                                                                                                                                                                                                                                                                                                         | Randox Laboratories                                                                                              | Wellcome Sanger Institute for the COVID-19 Genomics UK (COG-UK) Consortium                                                      | Randox Laboratories and Alex Alderton, Roberto Amato, Jeffrey Barrett, Sonia Goncalves, Ewan Harrison, David K. Jackson, Ian Johnston, Dominic Kwiatkowski, Cordelia Langford, John Sillitoe on behalf of the Wellcome Sanger Institute COVID-19 Surveillance Team                                                                                                                       |
| EPI_ISL_1390501, EPI_ISL_1390654, EPI_ISL_1390658                                                                                                                                                                                                                                                                                                                                                                                                                                                                                                                                                                                                                                                                                                                                                                                                                                                                                                                                                                                                                                                                                                                                                                                                                                                                                                                                                                                                                                                                                                                       | IZSM                                                                                                             | TIGEM                                                                                                                           | Antonio Grimaldi,Patrizia Annunziata,Francesco Panariello,Biancamaria Pierrri Claudia Tiberio Valentina Bouche,Chiara Colantuono,Maria Concetta Cuomo,Denise Di Concilio,Lucio Di Filippo,Anna Manfredi,Marcello Salvi,Antonio Limone Luigi Atripaldi Pellegriino Cerino,Andrea Ballabio,Davide Cacchiarelli                                                                             |
| EPI_ISL_1391025                                                                                                                                                                                                                                                                                                                                                                                                                                                                                                                                                                                                                                                                                                                                                                                                                                                                                                                                                                                                                                                                                                                                                                                                                                                                                                                                                                                                                                                                                                                                                         | I.R.C.C.S. "S. De Bellis" - Ente Ospedaliero                                                                     | Istituto Zooprofilattico Sperimentale della Puglia e della Basilicata                                                           | Parisi A., Bianco A., Capozzi L., Del Sambro L., Simone D., Lippolis A., Notarnicola M.                                                                                                                                                                                                                                                                                                  |
| EPI_ISL_1391066                                                                                                                                                                                                                                                                                                                                                                                                                                                                                                                                                                                                                                                                                                                                                                                                                                                                                                                                                                                                                                                                                                                                                                                                                                                                                                                                                                                                                                                                                                                                                         | Ospedale Santa Caterina Novella                                                                                  | Istituto Zooprofilattico Sperimentale della Puglia e della Basilicata                                                           | Parisi A., Bianco A., Capozzi L., Del Sambro L., Simone D., Difato L., Bruno A. R.                                                                                                                                                                                                                                                                                                       |
| EPI_ISL_1391292, EPI_ISL_1391294, EPI_ISL_1391298, EPI_ISL_1391312, EPI_ISL_1391330, EPI_ISL_1391347,                                                                                                                                                                                                                                                                                                                                                                                                                                                                                                                                                                                                                                                                                                                                                                                                                                                                                                                                                                                                                                                                                                                                                                                                                                                                                                                                                                                                                                                                   | Motol University Hospital                                                                                        | Institute of Applied Biotechnologies a.s.                                                                                       | Petr Klempert, Ondej Brzo, Martin Kašný, Kateina Kvapilová, Pavel Devínek, Petr Kvapil                                                                                                                                                                                                                                                                                                   |

|                                                                                                                                        |                                                                                                                                                                      |                                                                                                                                                                                                       |                                                                                                                                                                                                                                                                                 |
|----------------------------------------------------------------------------------------------------------------------------------------|----------------------------------------------------------------------------------------------------------------------------------------------------------------------|-------------------------------------------------------------------------------------------------------------------------------------------------------------------------------------------------------|---------------------------------------------------------------------------------------------------------------------------------------------------------------------------------------------------------------------------------------------------------------------------------|
| EPI_ISL_1391355                                                                                                                        |                                                                                                                                                                      |                                                                                                                                                                                                       |                                                                                                                                                                                                                                                                                 |
| EPI_ISL_1391387                                                                                                                        | DC Public Health Lab/ Dept. of Forensic Sciences                                                                                                                     | DC Public Health Lab/ Dept. of Forensic Sciences                                                                                                                                                      | Janis Doss, Scott Nguyen, Elizabeth Zelaya, Sarah Scott, Connie Maza, Monica Mann, Brittany Hamilton, David Payne, Jocelyn Hauser                                                                                                                                               |
| EPI_ISL_1392028                                                                                                                        | Sonora Quest Laboratories                                                                                                                                            | TGen North                                                                                                                                                                                            | *Jolene Bowers, Heather Centner, Chris French, Hayley Yaglom, Ashlyn Pfeiffer, Darrin Lemmer, Dave Engelthaler, The Arizona COVID Genomics Union (ACGU)*                                                                                                                        |
| EPI_ISL_1392641                                                                                                                        | National Medical Research Center for Obstetrics, Gynecology and Perinatology named after Academician V.I.Kulakov of the Ministry of Healthcare of Russian Federation | National Medical Research Center for Obstetrics, Gynecology and Perinatology named after Academician V.I.Kulakov of the Ministry of Healthcare of Russian Federation                                  | Jekaterina Shubina, Andrey Goltsov, Denis Rebrikov, Dmitry Korostin, Yegor Botsmanov, Dmitry Abramov, Andrey Donnikov, Tatiana Priputnevich, Dmitry Trofimov, Gennady Sukhikh                                                                                                   |
| EPI_ISL_1392800                                                                                                                        | CMBG FN Brno                                                                                                                                                         | CMBG FN Brno                                                                                                                                                                                          | Bezdicek M., Lengerova M., Svaton J.                                                                                                                                                                                                                                            |
| EPI_ISL_1392962, EPI_ISL_1393073, EPI_ISL_1393114, EPI_ISL_1393190, EPI_ISL_1393222, EPI_ISL_1393321, EPI_ISL_1393356, EPI_ISL_1393386 | Servicio de Microbiología Clínica (Complejo Hospitalario de Navarra, Pamplona)                                                                                       | Centro de Secuenciación NASERTIC                                                                                                                                                                      | Carmen Ezepeleta Baquedano, Ana Navascués, Ana Miqueleiz                                                                                                                                                                                                                        |
| EPI_ISL_1393637, EPI_ISL_1393638                                                                                                       | Laboratoria Medyczne Bruss grupa ALAB sp. z o.o. Medyczne Laboratorium Diagnostyczne                                                                                 | 1. National Institute of Public Health - National Institute of Hygiene; 2. Eurofins Genomics Europe Sequencing GmbH                                                                                   | Wokowicz Tomasz, Zacharczuk Katarzyna, Sadkowska-Todys Magorzata, Gierczyki Rafa, Eurofins Genomics Europe Sequencing Team, ECDC COVID-19 WGS support team                                                                                                                      |
| EPI_ISL_1393656                                                                                                                        | WSSE w Gdasku                                                                                                                                                        | 1. National Institute of Public Health - National Institute of Hygiene; 2. Eurofins Genomics Europe Sequencing GmbH                                                                                   | Wokowicz Tomasz, Zacharczuk Katarzyna, Sadkowska-Todys Magorzata, Gierczyki Rafa, Eurofins Genomics Europe Sequencing Team, ECDC COVID-19 WGS support team                                                                                                                      |
| EPI_ISL_1393667                                                                                                                        | Zakad Diagnostyki Laboratoryjnej Specjalistyczny Szpital im. dr Alfreda Sokoowskiego                                                                                 | 1. National Institute of Public Health - National Institute of Hygiene; 2. Eurofins Genomics Europe Sequencing GmbH                                                                                   | Wokowicz Tomasz, Zacharczuk Katarzyna, Sadkowska-Todys Magorzata, Gierczyki Rafa, Eurofins Genomics Europe Sequencing Team, ECDC COVID-19 WGS support team                                                                                                                      |
| EPI_ISL_1393745, EPI_ISL_1393757                                                                                                       | Regionalne Centrum Kwiadawstwa i Krwiolecznictwa w Biaymstoku Pracownia Diagnostyki Molekularnej wirusa SARS-CoV-2                                                   | 1. National Institute of Public Health - National Institute of Hygiene; 2. Eurofins Genomics Europe Sequencing GmbH                                                                                   | Wokowicz Tomasz, Zacharczuk Katarzyna, Sadkowska-Todys Magorzata, Gierczyki Rafa, Eurofins Genomics Europe Sequencing Team, ECDC COVID-19 WGS support team                                                                                                                      |
| EPI_ISL_1393887                                                                                                                        | WSSE Laboratorium Mikrobiologii i Parazytologii                                                                                                                      | 1. National Institute of Public Health - National Institute of Hygiene; 2. Eurofins Genomics Europe Sequencing GmbH                                                                                   | Wokowicz Tomasz, Zacharczuk Katarzyna, Sadkowska-Todys Magorzata, Gierczyki Rafa, Eurofins Genomics Europe Sequencing Team, ECDC COVID-19 WGS support team                                                                                                                      |
| EPI_ISL_1393902, EPI_ISL_1393961                                                                                                       | Zakad Mikrobiologii USK Opole                                                                                                                                        | 1. National Institute of Public Health - National Institute of Hygiene; 2. Eurofins Genomics Europe Sequencing GmbH                                                                                   | Wokowicz Tomasz, Zacharczuk Katarzyna, Sadkowska-Todys Magorzata, Gierczyki Rafa, Eurofins Genomics Europe Sequencing Team, ECDC COVID-19 WGS support team                                                                                                                      |
| EPI_ISL_1393985                                                                                                                        | Laboratorium Badawczo-Rozwojowe Vitagenum                                                                                                                            | 1. National Institute of Public Health - National Institute of Hygiene; 2. Eurofins Genomics Europe Sequencing GmbH                                                                                   | Wokowicz Tomasz, Zacharczuk Katarzyna, Sadkowska-Todys Magorzata, Gierczyki Rafa, Eurofins Genomics Europe Sequencing Team, ECDC COVID-19 WGS support team                                                                                                                      |
| EPI_ISL_1394050                                                                                                                        | Bruss                                                                                                                                                                | 1. National Institute of Public Health - National Institute of Hygiene; 2. Eurofins Genomics Europe Sequencing GmbH                                                                                   | Wokowicz Tomasz, Zacharczuk Katarzyna, Sadkowska-Todys Magorzata, Gierczyki Rafa, Eurofins Genomics Europe Sequencing Team, ECDC COVID-19 WGS support team                                                                                                                      |
| EPI_ISL_1394072                                                                                                                        | NZOZ Medyczne Laboratorium Diagnostyczne                                                                                                                             | 1. National Institute of Public Health - National Institute of Hygiene; 2. Eurofins Genomics Europe Sequencing GmbH                                                                                   | Wokowicz Tomasz, Zacharczuk Katarzyna, Sadkowska-Todys Magorzata, Gierczyki Rafa, Eurofins Genomics Europe Sequencing Team, ECDC COVID-19 WGS support team                                                                                                                      |
| EPI_ISL_1394082                                                                                                                        | Narodowy Instytut Onkologii im. Marii Sklodowskiej-Curie Pastwowy Instytut Badawczy                                                                                  | 1. National Institute of Public Health - National Institute of Hygiene; 2. Eurofins Genomics Europe Sequencing GmbH                                                                                   | Wokowicz Tomasz, Zacharczuk Katarzyna, Sadkowska-Todys Magorzata, Gierczyki Rafa, Eurofins Genomics Europe Sequencing Team, ECDC COVID-19 WGS support team                                                                                                                      |
| EPI_ISL_1394125, EPI_ISL_1394136                                                                                                       | Laboratorium Medyczne LAB-MED                                                                                                                                        | 1. National Institute of Public Health - National Institute of Hygiene; 2. Eurofins Genomics Europe Sequencing GmbH                                                                                   | Wokowicz Tomasz, Zacharczuk Katarzyna, Sadkowska-Todys Magorzata, Gierczyki Rafa, Eurofins Genomics Europe Sequencing Team, ECDC COVID-19 WGS support team                                                                                                                      |
| EPI_ISL_1394146, EPI_ISL_1394148                                                                                                       | WSSE w Krakowie                                                                                                                                                      | 1. National Institute of Public Health - National Institute of Hygiene; 2. Eurofins Genomics Europe Sequencing GmbH                                                                                   | Wokowicz Tomasz, Zacharczuk Katarzyna, Sadkowska-Todys Magorzata, Gierczyki Rafa, Eurofins Genomics Europe Sequencing Team, ECDC COVID-19 WGS support team                                                                                                                      |
| EPI_ISL_1394192, EPI_ISL_1394193, EPI_ISL_1394196                                                                                      | Laboratorum Epidemiologii WSSE w Szczecinie                                                                                                                          | 1. National Institute of Public Health - National Institute of Hygiene; 2. Eurofins Genomics Europe Sequencing GmbH                                                                                   | Wokowicz Tomasz, Zacharczuk Katarzyna, Sadkowska-Todys Magorzata, Gierczyki Rafa, Eurofins Genomics Europe Sequencing Team, ECDC COVID-19 WGS support team                                                                                                                      |
| EPI_ISL_1394224                                                                                                                        | Centrum Medycyny Klinicznej dr n. med. Karol Majewski Di MEDICAL                                                                                                     | 1. National Institute of Public Health - National Institute of Hygiene; 2. Eurofins Genomics Europe Sequencing GmbH                                                                                   | Wokowicz Tomasz, Zacharczuk Katarzyna, Sadkowska-Todys Magorzata, Gierczyki Rafa, Eurofins Genomics Europe Sequencing Team, ECDC COVID-19 WGS support team                                                                                                                      |
| EPI_ISL_1394262                                                                                                                        | WSSE w Olsztynie                                                                                                                                                     | 1. National Institute of Public Health - National Institute of Hygiene; 2. Eurofins Genomics Europe Sequencing GmbH                                                                                   | Wokowicz Tomasz, Zacharczuk Katarzyna, Sadkowska-Todys Magorzata, Gierczyki Rafa, Eurofins Genomics Europe Sequencing Team, ECDC COVID-19 WGS support team                                                                                                                      |
| EPI_ISL_1394283                                                                                                                        | Centrum Medyczne MEDYK Sp. z o.o. Sp.k. Zakad Diagnostyki Medycznej                                                                                                  | 1. National Institute of Public Health - National Institute of Hygiene; 2. Eurofins Genomics Europe Sequencing GmbH                                                                                   | Wokowicz Tomasz, Zacharczuk Katarzyna, Sadkowska-Todys Magorzata, Gierczyki Rafa, Eurofins Genomics Europe Sequencing Team, ECDC COVID-19 WGS support team                                                                                                                      |
| EPI_ISL_1394304                                                                                                                        | Hospital for Infectious Diseases, Molecular Diagnostics Laboratory, Warsaw, Poland                                                                                   | 1. Virogenetics Laboratory of Virology, Maopolska Centre of Biotechnology, Jagiellonian University. 2. Intercollegiate Faculty of Biotechnology University of Gdansk and Medical University of Gdansk | Lukasz Rabalski, Maciej Kosinski, Natalia Mazur-Panasiuk, Aneta Kopacz, Piotr Zabek, Tomasz Dyda, Andrzej Horban, Krzysztof Pyrc, Krystyna Bienkowska-Szewczyk                                                                                                                  |
| EPI_ISL_1394316, EPI_ISL_1394327                                                                                                       | Hospital for Infectious Diseases, Molecular Diagnostics Laboratory, Warsaw, Poland                                                                                   | 1. Virogenetics Laboratory of Virology, Maopolska Centre of Biotechnology, Jagiellonian University. 2. Intercollegiate Faculty of Biotechnology University of Gdansk and Medical University of Gdansk | Lukasz Rabalski, Maciej Kosinski, Karolina Gackowska, Natalia Mazur-Panasiuk, Aneta Kopacz, Piotr Zabek, Tomasz Dyda, Andrzej Horban, Krzysztof Pyrc, Krystyna Bienkowska-Szewczyk                                                                                              |
| EPI_ISL_1394426, EPI_ISL_1394444                                                                                                       | Hospital Universitari Vall d'Hebron - Vall d'Hebron Institut de Recerca                                                                                              | Hospital Universitari Vall d'Hebron - Vall d'Hebron Institut de Recerca                                                                                                                               | Cristina Andrés, Maria Piñana, Josep F Abril, Damir Garcia-Cehic, Ariadna Rando, Juliana Esperalba, Maria Gema Codina, Carla Castillo, Maria Carmen Martín, Tomás Pumarola, Josep Quer, Andrés Antón                                                                            |
| EPI_ISL_1394499                                                                                                                        | Hospital Universitari Arnau de Vilanova                                                                                                                              | Hospital Universitari Vall d'Hebron - Vall d'Hebron Institut de Recerca                                                                                                                               | Cristina Andrés, Maria Piñana, Josep F Abril, Damir Garcia-Cehic, Ariadna Rando, Juliana Esperalba, Maria Gema Codina, Carla Castillo, Maria Carmen Martín, Tomás Pumarola, Josep Quer, Andrés Antón                                                                            |
| EPI_ISL_1394613                                                                                                                        | WESTCHESTER MEDICAL CENTER                                                                                                                                           | Wadsworth Center, New York State Department of Health                                                                                                                                                 | Kirsten St. George, Daryl M. Lamson, Alexis Russel, Matthew Shudt, Melissa A Leisner, Jonathan Plitnick, Navjot Singh, John Kelly, Erasmus Schneider, Erica Lasek-Nesselquist                                                                                                   |
| EPI_ISL_1395792                                                                                                                        | Laboratorio de Virología del Hospital de Niños Dr. Ricardo Gutiérrez                                                                                                 | Área de Secuenciación del Laboratorio de Virología del Hospital de Niños Dr. Ricardo Gutiérrez on behalf of 'Proyecto Argentino Interinstitucional de genómica de SARS-CoV-2' (PAIS Consortium)       | Alexay, S; Thomas, G; Medina, C; Labarta, N; Streitenberger, C; Villegas, E; Barreda Frank, M; Grandis, E; Acevedo, ME; Alvarez Lopez, C; Jacques, O; Místchenko, A; Nabaes Jodar, M; Goya, S; Lusso, S; Acuña, D; Natale, MI; Valinotto, LE; Viegas, M.                        |
| EPI_ISL_1396555                                                                                                                        | Cytocheck Laboratory                                                                                                                                                 | Kansas Health and Environmental Lab                                                                                                                                                                   | Mike Grose, Jonathan Barnell, Ben Olsen, and Phil Adam                                                                                                                                                                                                                          |
| EPI_ISL_1396609, EPI_ISL_1396614                                                                                                       | 1. Główny Inspektorat Sanitarny. 2. Diagnostyka. Laboratoria Medyczne.                                                                                               | 1. ViroGenetics - BSL3 Laboratory of Virology, Maopolska Centre of Biotechnology, Jagiellonian University; 2. Diagnoston Laboratoria Lukasz Rabalski                                                  | Lukasz Rabalski, Tomasz Gromowski, Tomasz Dyda, Natalia Mazur-Panasiuk, Andrzej Horban, Piotr Zabek, Maciej Kosinski, Natalia Derewonko, Sylwia Januszczak, Krzysztof Pyrc                                                                                                      |
| EPI_ISL_1396695, EPI_ISL_1396724                                                                                                       | CHU Lille                                                                                                                                                            | CHU Lille - Laboratoire de Virologie                                                                                                                                                                  | AIT YAHYA Emilie, ALIDJINOU Enagnon Kazali, BOCKET Laurence, CREPIN Michel, DEMAY Christophe, ENGELMANN Iika, GEFFROY Sandrine, GUIGON Aurélie, LAMBERT Valérie, LAZREK Mouna, NOBILLIAUX Florian, PREVOST Brigitte, THUILLIER Caroline, TINEZ Claire, TCHANTCHOU NJOSSE YANICK |
| EPI_ISL_1396780, EPI_ISL_1396787                                                                                                       | Hôpital Henri Mondor                                                                                                                                                 | Department of Virology, Henri Mondor University Hospital, Assistance Publique Hôpitaux de Paris, Université Paris-Est                                                                                 | Christophe Rodriguez, Slim Fourati, Vanessa Demontant, Guillaume Gricourt, Melissa N'Debi, Alexandre Soulier, Elisabeth Trawinski, Jean-Michel Pawlowsky                                                                                                                        |



|                                                                                                                                        |                                                                                                                                                       |                                                                                                                                                                    |                                                                                                                                                                                                                                                                                  |
|----------------------------------------------------------------------------------------------------------------------------------------|-------------------------------------------------------------------------------------------------------------------------------------------------------|--------------------------------------------------------------------------------------------------------------------------------------------------------------------|----------------------------------------------------------------------------------------------------------------------------------------------------------------------------------------------------------------------------------------------------------------------------------|
| EPI_ISL_1396874, EPI_ISL_1396879, EPI_ISL_1396880                                                                                      | BIOPATH                                                                                                                                               | Créteil, INSERM U955<br>Department of Virology, Henri Mondor University Hospital, Assistance Publique Hôpitaux de Paris, Université Paris-Est Créteil, INSERM U955 | Christophe Rodriguez, Slim Fourati, Vanessa Demontant, Guillaume Gricourt, Melissa N'Debi, Alexandre Soulier, Elisabeth Trawinski, Jean-Michel Pawlotsky                                                                                                                         |
| EPI_ISL_1396980, EPI_ISL_1397353, EPI_ISL_1397418                                                                                      | National Virus Reference Laboratory<br>SUNY UPSTATE MEDICAL UNIVERSITY                                                                                | National Virus Reference Laboratory<br>Wadsworth Center, New York State Department of Health                                                                       | Zoe Yandle, Charlene Bennet, Gabriel Gonzalez, Michael Carr, Jonathan Dean, Cillian F De Gascun<br>Kirsten St. George, Daryl M. Lamson, Alexis Russel, Matthew Shudt, Melissa A Leisner, Jonathan Plitnick, Navjot Singh, John Kelly, Erasmus Schneider, Erica Lasek-Nesselquist |
| EPI_ISL_1397471, EPI_ISL_1397508                                                                                                       | New York Presbyterian Hospital                                                                                                                        | Wadsworth Center, New York State Department of Health                                                                                                              | Kirsten St. George, Daryl M. Lamson, Alexis Russel, Matthew Shudt, Melissa A Leisner, Jonathan Plitnick, Navjot Singh, John Kelly, Erasmus Schneider, Erica Lasek-Nesselquist                                                                                                    |
| EPI_ISL_1397562                                                                                                                        | URMC LABS                                                                                                                                             | Wadsworth Center, New York State Department of Health                                                                                                              | Kirsten St. George, Daryl M. Lamson, Alexis Russel, Matthew Shudt, Melissa A Leisner, Jonathan Plitnick, Navjot Singh, John Kelly, Erasmus Schneider, Erica Lasek-Nesselquist                                                                                                    |
| EPI_ISL_1397582, EPI_ISL_1397583, EPI_ISL_1397584, EPI_ISL_1397585, EPI_ISL_1397587, EPI_ISL_1397589, EPI_ISL_1397591                  | TEMPUS LABS INC                                                                                                                                       | Wadsworth Center, New York State Department of Health                                                                                                              | Kirsten St. George, Daryl M. Lamson, Alexis Russel, Matthew Shudt, Melissa A Leisner, Jonathan Plitnick, Navjot Singh, John Kelly, Erasmus Schneider, Erica Lasek-Nesselquist                                                                                                    |
| EPI_ISL_1397594                                                                                                                        | SUNY UPSTATE MEDICAL UNIVERSITY                                                                                                                       | Wadsworth Center, New York State Department of Health                                                                                                              | Kirsten St. George, Daryl M. Lamson, Alexis Russel, Matthew Shudt, Melissa A Leisner, Jonathan Plitnick, Navjot Singh, John Kelly, Erasmus Schneider, Erica Lasek-Nesselquist                                                                                                    |
| EPI_ISL_1397613                                                                                                                        | THE MARY IMOGENE BASSETT HOSPITAL                                                                                                                     | Wadsworth Center, New York State Department of Health                                                                                                              | Kirsten St. George, Daryl M. Lamson, Alexis Russel, Matthew Shudt, Melissa A Leisner, Jonathan Plitnick, Navjot Singh, John Kelly, Erasmus Schneider, Erica Lasek-Nesselquist                                                                                                    |
| EPI_ISL_1397619, EPI_ISL_1397622                                                                                                       | MONTEFIORE MEDICAL CENTER LABORATORIES                                                                                                                | Wadsworth Center, New York State Department of Health                                                                                                              | Kirsten St. George, Daryl M. Lamson, Alexis Russel, Matthew Shudt, Melissa A Leisner, Jonathan Plitnick, Navjot Singh, John Kelly, Erasmus Schneider, Erica Lasek-Nesselquist                                                                                                    |
| EPI_ISL_1397671, EPI_ISL_1397673, EPI_ISL_1397676, EPI_ISL_1397679                                                                     | NORTH SHORE UNIVERSITY HOSPITAL                                                                                                                       | Wadsworth Center, New York State Department of Health                                                                                                              | Kirsten St. George, Daryl M. Lamson, Alexis Russel, Matthew Shudt, Melissa A Leisner, Jonathan Plitnick, Navjot Singh, John Kelly, Erasmus Schneider, Erica Lasek-Nesselquist                                                                                                    |
| EPI_ISL_1397694                                                                                                                        | BIO-REFERENCE LABORATORIES                                                                                                                            | Wadsworth Center, New York State Department of Health                                                                                                              | Kirsten St. George, Daryl M. Lamson, Alexis Russel, Matthew Shudt, Melissa A Leisner, Jonathan Plitnick, Navjot Singh, John Kelly, Erasmus Schneider, Erica Lasek-Nesselquist                                                                                                    |
| EPI_ISL_1397700, EPI_ISL_1397702                                                                                                       | TEMPUS LABS INC                                                                                                                                       | Wadsworth Center, New York State Department of Health                                                                                                              | Kirsten St. George, Daryl M. Lamson, Alexis Russel, Matthew Shudt, Melissa A Leisner, Jonathan Plitnick, Navjot Singh, John Kelly, Erasmus Schneider, Erica Lasek-Nesselquist                                                                                                    |
| EPI_ISL_1397810, EPI_ISL_1397812                                                                                                       | URMC LABS                                                                                                                                             | Wadsworth Center, New York State Department of Health                                                                                                              | Kirsten St. George, Daryl M. Lamson, Alexis Russel, Matthew Shudt, Melissa A Leisner, Jonathan Plitnick, Navjot Singh, John Kelly, Erasmus Schneider, Erica Lasek-Nesselquist                                                                                                    |
| EPI_ISL_1397829                                                                                                                        | NORTHWELL HEALTH LABORATORIES                                                                                                                         | Wadsworth Center, New York State Department of Health                                                                                                              | Kirsten St. George, Daryl M. Lamson, Alexis Russel, Matthew Shudt, Melissa A Leisner, Jonathan Plitnick, Navjot Singh, John Kelly, Erasmus Schneider, Erica Lasek-Nesselquist                                                                                                    |
| EPI_ISL_1397840, EPI_ISL_1397846, EPI_ISL_1397849, EPI_ISL_1397851, EPI_ISL_1397859, EPI_ISL_1397863, EPI_ISL_1397864                  | TEMPUS LABS INC                                                                                                                                       | Wadsworth Center, New York State Department of Health                                                                                                              | Kirsten St. George, Daryl M. Lamson, Alexis Russel, Matthew Shudt, Melissa A Leisner, Jonathan Plitnick, Navjot Singh, John Kelly, Erasmus Schneider, Erica Lasek-Nesselquist                                                                                                    |
| EPI_ISL_1397913                                                                                                                        | BIO-REFERENCE LABORATORIES                                                                                                                            | Wadsworth Center, New York State Department of Health                                                                                                              | Kirsten St. George, Daryl M. Lamson, Alexis Russel, Matthew Shudt, Melissa A Leisner, Jonathan Plitnick, Navjot Singh, John Kelly, Erasmus Schneider, Erica Lasek-Nesselquist                                                                                                    |
| EPI_ISL_1397917, EPI_ISL_1397923, EPI_ISL_1397949                                                                                      | WESTCHESTER MEDICAL CENTER                                                                                                                            | Wadsworth Center, New York State Department of Health                                                                                                              | Kirsten St. George, Daryl M. Lamson, Alexis Russel, Matthew Shudt, Melissa A Leisner, Jonathan Plitnick, Navjot Singh, John Kelly, Erasmus Schneider, Erica Lasek-Nesselquist                                                                                                    |
| EPI_ISL_1397958, EPI_ISL_1397959, EPI_ISL_1397960                                                                                      | Department of Virology                                                                                                                                | Department of Virology                                                                                                                                             | Massab Umair, Aamer Ikram, Muhammad Salman, Nazish Badar, Sana Tamim, Zaira Rehman, Abdul Ahad, Shannon Whitmer, Melissa Mobley, Austin Leach, Ketan Patel, Joel Montgomery, John Klana                                                                                          |
| EPI_ISL_1398008                                                                                                                        | URMC LABS                                                                                                                                             | Wadsworth Center, New York State Department of Health                                                                                                              | Kirsten St. George, Daryl M. Lamson, Alexis Russel, Matthew Shudt, Melissa A Leisner, Jonathan Plitnick, Navjot Singh, John Kelly, Erasmus Schneider, Erica Lasek-Nesselquist                                                                                                    |
| EPI_ISL_1398030                                                                                                                        | WESTCHESTER MEDICAL CENTER                                                                                                                            | Wadsworth Center, New York State Department of Health                                                                                                              | Kirsten St. George, Daryl M. Lamson, Alexis Russel, Matthew Shudt, Melissa A Leisner, Jonathan Plitnick, Navjot Singh, John Kelly, Erasmus Schneider, Erica Lasek-Nesselquist                                                                                                    |
| EPI_ISL_1398039                                                                                                                        | Department of Virology                                                                                                                                | Department of Virology                                                                                                                                             | Massab Umair, Aamer Ikram, Muhammad Salman, Nazish Badar, Sana Tamim, Zaira Rehman, Abdul Ahad, Shannon Whitmer, Melissa Mobley, Austin Leach, Ketan Patel, Joel Montgomery, John Klana                                                                                          |
| EPI_ISL_1398073, EPI_ISL_1398089, EPI_ISL_1398094, EPI_ISL_1398096, EPI_ISL_1398101, EPI_ISL_1398106, EPI_ISL_1398115, EPI_ISL_1398116 | NORTHWELL HEALTH LABORATORIES                                                                                                                         | Wadsworth Center, New York State Department of Health                                                                                                              | Kirsten St. George, Daryl M. Lamson, Alexis Russel, Matthew Shudt, Melissa A Leisner, Jonathan Plitnick, Navjot Singh, John Kelly, Erasmus Schneider, Erica Lasek-Nesselquist                                                                                                    |
| EPI_ISL_1398139                                                                                                                        | URMC LABS                                                                                                                                             | Wadsworth Center, New York State Department of Health                                                                                                              | Kirsten St. George, Daryl M. Lamson, Alexis Russel, Matthew Shudt, Melissa A Leisner, Jonathan Plitnick, Navjot Singh, John Kelly, Erasmus Schneider, Erica Lasek-Nesselquist                                                                                                    |
| EPI_ISL_1398200                                                                                                                        | Columbia University Irving Medical Center                                                                                                             | Wadsworth Center, New York State Department of Health                                                                                                              | Kirsten St. George, Daryl M. Lamson, Alexis Russel, Matthew Shudt, Melissa A Leisner, Jonathan Plitnick, Navjot Singh, John Kelly, Erasmus Schneider, Erica Lasek-Nesselquist                                                                                                    |
| EPI_ISL_1398282                                                                                                                        | ALBANY MEDICAL CENTER                                                                                                                                 | Wadsworth Center, New York State Department of Health                                                                                                              | Kirsten St. George, Daryl M. Lamson, Alexis Russel, Matthew Shudt, Melissa A Leisner, Jonathan Plitnick, Navjot Singh, John Kelly, Erasmus Schneider, Erica Lasek-Nesselquist                                                                                                    |
| EPI_ISL_1398302                                                                                                                        | NYC Pandemic Response Lab                                                                                                                             | Wadsworth Center, New York State Department of Health                                                                                                              | Kirsten St. George, Daryl M. Lamson, Alexis Russel, Matthew Shudt, Melissa A Leisner, Jonathan Plitnick, Navjot Singh, John Kelly, Erasmus Schneider, Erica Lasek-Nesselquist                                                                                                    |
| EPI_ISL_1398333                                                                                                                        | MONTEFIORE MEDICAL CENTER LABORATORIES                                                                                                                | Wadsworth Center, New York State Department of Health                                                                                                              | Kirsten St. George, Daryl M. Lamson, Alexis Russel, Matthew Shudt, Melissa A Leisner, Jonathan Plitnick, Navjot Singh, John Kelly, Erasmus Schneider, Erica Lasek-Nesselquist                                                                                                    |
| EPI_ISL_1398845, EPI_ISL_1398867                                                                                                       | National Virus Reference Laboratory                                                                                                                   | National Virus Reference Laboratory                                                                                                                                | Zoe Yandle, Charlene Bennet, Gabriel Gonzalez, Michael Carr, Jonathan Dean, Cillian F De Gascun                                                                                                                                                                                  |
| EPI_ISL_1399138, EPI_ISL_1399147, EPI_ISL_1399342                                                                                      | National Virus Reference Laboratory<br>Instituto Nacional de Saude (INSA) and BioSystems & Integrative Sciences Institute (BioSI) Genomics Unit, FCUL | National Virus Reference Laboratory<br>Instituto Nacional de Saude (INSA) and BioSystems & Integrative Sciences Institute (BioSI) Genomics Unit, FCUL              | Zoe Yandle, Charlene Bennett, Gabriel Gonzalez, Michael Carr, Jonathan Dean, Cillian F De Gascun<br>Borges et al                                                                                                                                                                 |
| EPI_ISL_1399400, EPI_ISL_1399424                                                                                                       | Instituto Nacional de Saude (INSA) and Instituto Gulbenkian de Ciencia (IGC)                                                                          | Instituto Nacional de Saude (INSA) and Instituto Gulbenkian de Ciencia (IGC)                                                                                       | Borges et al                                                                                                                                                                                                                                                                     |
| EPI_ISL_1399633                                                                                                                        | Instituto Nacional de Saude (INSA) and BioSystems & Integrative Sciences Institute (BioSI) Genomics Unit, FCUL                                        | Instituto Nacional de Saude (INSA) and BioSystems & Integrative Sciences Institute (BioSI) Genomics Unit, FCUL                                                     | Borges et al                                                                                                                                                                                                                                                                     |
| EPI_ISL_1399685                                                                                                                        | Instituto Nacional de Saude (INSA)                                                                                                                    | Instituto Nacional de Saude (INSA)                                                                                                                                 | Borges et al                                                                                                                                                                                                                                                                     |
| EPI_ISL_1399874                                                                                                                        | Instituto Nacional de Saude (INSA) and Instituto Gulbenkian                                                                                           | Instituto Nacional de Saude (INSA) and Instituto Gulbenkian                                                                                                        | Borges et al                                                                                                                                                                                                                                                                     |

|                                                                                                                                                                                                                                                                                                                                                                                                                                                                                                             | de Ciencia (IGC)                                                                                               | de Ciencia (IGC)                                                                                                                                            |                                                                                                                                                                                                                                                                                                                                                                                                                                                                         |
|-------------------------------------------------------------------------------------------------------------------------------------------------------------------------------------------------------------------------------------------------------------------------------------------------------------------------------------------------------------------------------------------------------------------------------------------------------------------------------------------------------------|----------------------------------------------------------------------------------------------------------------|-------------------------------------------------------------------------------------------------------------------------------------------------------------|-------------------------------------------------------------------------------------------------------------------------------------------------------------------------------------------------------------------------------------------------------------------------------------------------------------------------------------------------------------------------------------------------------------------------------------------------------------------------|
| EPI_ISL_1399889                                                                                                                                                                                                                                                                                                                                                                                                                                                                                             | Instituto Nacional de Saude (INSA) and BioSystems & Integrative Sciences Institute (BioSI) Genomics Unit, FCUL | Instituto Nacional de Saude (INSA) and BioSystems & Integrative Sciences Institute (BioSI) Genomics Unit, FCUL                                              | Borges et al                                                                                                                                                                                                                                                                                                                                                                                                                                                            |
| EPI_ISL_1399960                                                                                                                                                                                                                                                                                                                                                                                                                                                                                             | Instituto Nacional de Saude (INSA)                                                                             | Instituto Nacional de Saude (INSA)                                                                                                                          | Borges et al                                                                                                                                                                                                                                                                                                                                                                                                                                                            |
| EPI_ISL_1400444, EPI_ISL_1400448, EPI_ISL_1400449, EPI_ISL_1400452, EPI_ISL_1400453, EPI_ISL_1400457                                                                                                                                                                                                                                                                                                                                                                                                        | IN State Department of Health Laboratory Services                                                              | IN State Department of Health Laboratory Services                                                                                                           | Cassandra Campion, Jamie Yeadon, Brian Pope, Lixia Liu, Kyle Brownlee, Melissa Hindenlang, Ankita Kashikar, Mark Glazier                                                                                                                                                                                                                                                                                                                                                |
| EPI_ISL_1400950, EPI_ISL_1400981                                                                                                                                                                                                                                                                                                                                                                                                                                                                            | New Mexico Department of Health Scientific Laboratory                                                          | New Mexico Department of Health Scientific Laboratory                                                                                                       | Elle Johnson, Anastacia Griego-Fisher, D'edra Malone, Jennifer Benoit                                                                                                                                                                                                                                                                                                                                                                                                   |
| EPI_ISL_1401085                                                                                                                                                                                                                                                                                                                                                                                                                                                                                             | South Dakota Public Health Laboratory                                                                          | South Dakota Public Health Laboratory                                                                                                                       | Jacob Garfin and Chris Carlson                                                                                                                                                                                                                                                                                                                                                                                                                                          |
| EPI_ISL_1401118, EPI_ISL_1401168, EPI_ISL_1401184, EPI_ISL_1401195, EPI_ISL_1401329, EPI_ISL_1401330, EPI_ISL_1401336, EPI_ISL_1401359, EPI_ISL_1401424                                                                                                                                                                                                                                                                                                                                                     | National Center of Infectious and Parasitic Diseases                                                           | National Center of Infectious and Parasitic Diseases                                                                                                        | Alexiev et al                                                                                                                                                                                                                                                                                                                                                                                                                                                           |
| EPI_ISL_1401482, EPI_ISL_1401487, EPI_ISL_1401488, EPI_ISL_1401493, EPI_ISL_1401494, EPI_ISL_1401495, EPI_ISL_1401496, EPI_ISL_1401497, EPI_ISL_1401498, EPI_ISL_1401500, EPI_ISL_1401502, EPI_ISL_1401505, EPI_ISL_1401512, EPI_ISL_1401524, EPI_ISL_1401531, EPI_ISL_1401532, EPI_ISL_1401533, EPI_ISL_1401536, EPI_ISL_1401537, EPI_ISL_1401543, EPI_ISL_1401544, EPI_ISL_1401546, EPI_ISL_1401547, EPI_ISL_1401555, EPI_ISL_1401556, EPI_ISL_1401557, EPI_ISL_1401562, EPI_ISL_1401563, EPI_ISL_1401564 | The Jackson Laboratory                                                                                         | The Jackson Laboratory                                                                                                                                      | Bergeron D, Uvalic J, Renzette N, Adams M, Omerza G, Kelly K, Li L                                                                                                                                                                                                                                                                                                                                                                                                      |
| see above                                                                                                                                                                                                                                                                                                                                                                                                                                                                                                   | The Jackson Laboratory                                                                                         | The Jackson Laboratory                                                                                                                                      | Bergeron D, Uvalic J, Renzette N, Adams M, Omerza G, Kelly K, Li L                                                                                                                                                                                                                                                                                                                                                                                                      |
| EPI_ISL_1401614                                                                                                                                                                                                                                                                                                                                                                                                                                                                                             | Public Health Authority of the Slovak Republic                                                                 | Laboratory of Genomics and Bioinformatics, Comenius University Science Park                                                                                 | Tatiana Sedláčková, Diana Rusáková, Miroslav Böhmer, Anna Giová, Jaroslav Budiš, Tomáš Szemes                                                                                                                                                                                                                                                                                                                                                                           |
| EPI_ISL_1402164                                                                                                                                                                                                                                                                                                                                                                                                                                                                                             | Department of Public Health Microbiology Ljubljana, National Laboratory for Health, Environment and Food       | Department of Public Health Microbiology Ljubljana, National Laboratory for Health, Environment and Food                                                    | Tom Koritnik, José Gonçalves, Martin Bosilj, Katarina Proscenc, Metka Paragi                                                                                                                                                                                                                                                                                                                                                                                            |
| EPI_ISL_1402354, EPI_ISL_1402361                                                                                                                                                                                                                                                                                                                                                                                                                                                                            | Vyskov hospital                                                                                                | CMBG FN Brno                                                                                                                                                | Bezdicek M., Lengerova M., Svaton J., Hanslianova M.                                                                                                                                                                                                                                                                                                                                                                                                                    |
| EPI_ISL_1402502, EPI_ISL_1402513                                                                                                                                                                                                                                                                                                                                                                                                                                                                            | 1. Główny Inspektorat Sanitarny. 2. Diagnostyka. Laboratoria Medyczne.                                         | 1. ViroGenetics - BSL3 Laboratory of Virology, Maopolska Centre of Biotechnology, Jagiellonian University; 2. genXone SA, Research & Development Laboratory | Mazur-Panasiuk,N., Grzegorz Nowicki, Gromowski,T., Natalia Drweska-Matelska, Jakub Grabowski, Anna Brylak, Aleksandra Gidlewicz, Karol Szeszko, Maciej Sykulski, ukasz Krych, Kowalski,M., Szulc,P., Sylwia Januszczak, Labaj,P.P., Micha Kaszuba, Pyrc,K.                                                                                                                                                                                                              |
| EPI_ISL_1402695, EPI_ISL_1402697, EPI_ISL_1402705                                                                                                                                                                                                                                                                                                                                                                                                                                                           | 1. Główny Inspektorat Sanitarny. 2. Diagnostyka. Laboratoria Medyczne.                                         | 1. ViroGenetics - BSL3 Laboratory of Virology, Maopolska Centre of Biotechnology, Jagiellonian University; 2. genXone SA, Research & Development Laboratory | Mazur-Panasiuk,N., Grzegorz Nowicki, Gromowski,T., Natalia Drweska-Matelska, Jakub Grabowski, Anna Brylak, Aleksandra Gidlewicz, Karol Szeszko, Maciej Sykulski, ukasz Krych, Kowalski,M., Szulc,P., Sylwia Januszczak, Labaj,P.P., Micha Kaszuba, Pyrc,K.                                                                                                                                                                                                              |
| EPI_ISL_1402759                                                                                                                                                                                                                                                                                                                                                                                                                                                                                             | M Health Fairview                                                                                              | Minnesota Department of Health, Public Health Laboratory                                                                                                    | Alexandra Lorentz, Jacob Garfin, Matt Plumb, and Xiong Wang                                                                                                                                                                                                                                                                                                                                                                                                             |
| EPI_ISL_1402833                                                                                                                                                                                                                                                                                                                                                                                                                                                                                             | Johns Hopkins Hospital Department of Pathology                                                                 | Johns Hopkins Hospital Department of Pathology                                                                                                              | C. Paul Morris, Chun Huai Luo, Adannaya Amadi, Matthew Schwartz, Heba H. Mostafa                                                                                                                                                                                                                                                                                                                                                                                        |
| EPI_ISL_1403429                                                                                                                                                                                                                                                                                                                                                                                                                                                                                             | Institute of Microbiology and Immunology, Faculty of Medicine, University of Ljubljana                         | Institute of Microbiology and Immunology, Faculty of Medicine, University of Ljubljana                                                                      | Alen Sulji, Samo Zakotnik, Tomaž Mark Zorec, Matic Brvar, Doroteja Vljaj, Andraž Celar, Dominika Šturm, Patricija Pozvek, Špela Pleh, Miša Korva, Mario Poljak, Tatjana Avši - Županc                                                                                                                                                                                                                                                                                   |
| EPI_ISL_1403609                                                                                                                                                                                                                                                                                                                                                                                                                                                                                             | Molecular Virology Unit, Microbiology and Virology Department, Fondazione IRCCS Policlinico San Matteo, Pavia  | Molecular Virology Unit, Microbiology and Virology Department, Fondazione IRCCS Policlinico San Matteo, Pavia                                               | Federica Giardina, Guglielmo Ferrari, Stefano Gaiarsa, Gherard Batisti Biffignandi, Stefania Paolucci, Antonio Piralla, Fausto Baldanti                                                                                                                                                                                                                                                                                                                                 |
| EPI_ISL_1403854                                                                                                                                                                                                                                                                                                                                                                                                                                                                                             | Utah Public Health Laboratory                                                                                  | Utah Public Health Laboratory                                                                                                                               | Erin L. Young, Kelly F. Oakeson, Tara Gallagher                                                                                                                                                                                                                                                                                                                                                                                                                         |
| EPI_ISL_1404394                                                                                                                                                                                                                                                                                                                                                                                                                                                                                             | Klinisch Laboratorium ZNA                                                                                      | Klinisch Laboratorium ZNA                                                                                                                                   | Verstrepen et al.                                                                                                                                                                                                                                                                                                                                                                                                                                                       |
| EPI_ISL_1404588                                                                                                                                                                                                                                                                                                                                                                                                                                                                                             | Biolab Diagnostic Laboratories                                                                                 | Biolab Diagnostic Laboratories                                                                                                                              | Issa Abu-Dayyeh, Ahmad Tibi, Lama Hussein, Shayma Ali, Badia Sadeddin, Eiad Atwa, Amid Abdelnour                                                                                                                                                                                                                                                                                                                                                                        |
| EPI_ISL_1404955, EPI_ISL_1404976, EPI_ISL_1404982, EPI_ISL_1404995, EPI_ISL_1404996                                                                                                                                                                                                                                                                                                                                                                                                                         | Eurofins Diatherix                                                                                             | Hudsonalpha Genome Sequencing Center                                                                                                                        | Jane Grimwood, Melissa Williams, Lori H. Handley, Joshua Stough, Leslie Malone, Stefan Brzezinski, Ada Stewart, Teresa Jones, Jenell Webber, John Lovell, Jennifer Cart, and Jeremy Schmutz                                                                                                                                                                                                                                                                             |
| EPI_ISL_1405001, EPI_ISL_1405002, EPI_ISL_1405004, EPI_ISL_1405005, EPI_ISL_1405007, EPI_ISL_1405008, EPI_ISL_1405018, EPI_ISL_1405021, EPI_ISL_1405025, EPI_ISL_1405028, EPI_ISL_1405046, EPI_ISL_1405047                                                                                                                                                                                                                                                                                                  | see above                                                                                                      | NJDOH, Public Health and Environmental Laboratories                                                                                                         | New Jersey Public Health and Environmental Laboratories (NJ PHEL)                                                                                                                                                                                                                                                                                                                                                                                                       |
| see above                                                                                                                                                                                                                                                                                                                                                                                                                                                                                                   | NJDOH, Public Health and Environmental Laboratories                                                            | New Jersey Public Health and Environmental Laboratories (NJ PHEL)                                                                                           | Lindsey Bodnar, Shiv K. Verma, Dana Woell, Byeong Jeong                                                                                                                                                                                                                                                                                                                                                                                                                 |
| EPI_ISL_1405249                                                                                                                                                                                                                                                                                                                                                                                                                                                                                             | UW Virology Lab                                                                                                | UW Virology Lab                                                                                                                                             | Pavitra Roychoudhury, Hong Xie, Lasata Shrestha, Shah Mohamed Bakhsh, Michelle Lin, Noah R. Baker, Sean Ellis, Saraswathi Sathees, Meei-Li Huang, Keith R Jerome, Alexander Greninger                                                                                                                                                                                                                                                                                   |
| EPI_ISL_1406272                                                                                                                                                                                                                                                                                                                                                                                                                                                                                             | Laboratorio de Virologia HUCA                                                                                  | Laboratorio de Virologia HUCA                                                                                                                               | Sandoval M, Castelló C, Gómez de Oña J, Boga JA, Rojo S, Alvarez-Arguelles ME, Abreu F, Costales I, Perez-Martínez Z, Martín-Rodríguez G, Coto E, Melón S                                                                                                                                                                                                                                                                                                               |
| EPI_ISL_1406305                                                                                                                                                                                                                                                                                                                                                                                                                                                                                             | Laboratorio Aziendale di Microbiologia e Virologia, Azienda Sanitaria dell'Alto Adige                          | Laboratorio Aziendale di Microbiologia e Virologia, Azienda Sanitaria dell'Alto Adige                                                                       | Irene Bianconi, Bartolomeo Mobilio Rodríguez, Elisabetta Giacobazzi, Elisa Masi, Stefanie Wieser, Anne Picard, Claudia Volpato, Chiara Cantaloni, Elisabetta Pagani                                                                                                                                                                                                                                                                                                     |
| EPI_ISL_1406316, EPI_ISL_1406340, EPI_ISL_1406345, EPI_ISL_1406349, EPI_ISL_1406356, EPI_ISL_1406369, EPI_ISL_1406372                                                                                                                                                                                                                                                                                                                                                                                       | 1. Główny Inspektorat Sanitarny. 2. Diagnostyka. Laboratoria Medyczne.                                         | 1. ViroGenetics - BSL3 Laboratory of Virology, Maopolska Centre of Biotechnology, Jagiellonian University; 2. genXone SA, Research & Development Laboratory | Mazur-Panasiuk,N., Grzegorz Nowicki, Gromowski,T., Natalia Drweska-Matelska, Jakub Grabowski, Anna Brylak, Aleksandra Gidlewicz, Karol Szeszko, Maciej Sykulski, ukasz Krych, Kowalski,M., Szulc,P., Sylwia Januszczak, Labaj,P.P., Micha Kaszuba, Pyrc,K.                                                                                                                                                                                                              |
| EPI_ISL_1406428                                                                                                                                                                                                                                                                                                                                                                                                                                                                                             | Laboratorio de Virologia HUCA                                                                                  | Laboratorio de Virologia HUCA                                                                                                                               | Sandoval M, Castelló C, Gómez de Oña J, Boga JA, Rojo S, Alvarez-Arguelles ME, Abreu F, Costales I, Perez-Martínez Z, Martín-Rodríguez G, Coto E, Melón S                                                                                                                                                                                                                                                                                                               |
| EPI_ISL_1406592                                                                                                                                                                                                                                                                                                                                                                                                                                                                                             | Centre hospitalier D'AURILLAC                                                                                  | CHU Clermont-Ferrand, service de virologie                                                                                                                  | Bisseux Maxime, Mirand Audrey, Combes Patricia, Henquell Cécile                                                                                                                                                                                                                                                                                                                                                                                                         |
| EPI_ISL_1406629                                                                                                                                                                                                                                                                                                                                                                                                                                                                                             | Centre Hospitalier Universitaire Clermont-Ferrand                                                              | CHU Clermont-Ferrand, service de virologie                                                                                                                  | Bisseux Maxime, Mirand Audrey, Combes Patricia, Henquell Cécile                                                                                                                                                                                                                                                                                                                                                                                                         |
| EPI_ISL_1407075                                                                                                                                                                                                                                                                                                                                                                                                                                                                                             | Viollier AG                                                                                                    | Department of Biosystems Science and Engineering, ETH Zürich                                                                                                | Chaoran Chen, Sarah Nadeau, Catharine Aquino, Ivan Topolsky, Philipp Jablonski, Lara Fuhrmann, David Dreifuss, Katharina Jahn, Andreia Cabral de Gouvea, Maria Domenica Moccia, Simon Grüter, Timothy Sykes, Lennart Opitz, Griffin White, Laura Neff, Doris Popovic, Andrea Patignani, Jay Tracy, Ralph Schlapbach, Christiane Beckmann, Maurice Redondo, Olivier Kobel, Christoph Noppen, Sophie Seidel, Noemie Santamaria de Souza, Niko Beerenwinkel, Tanja Stadler |
| EPI_ISL_1407116                                                                                                                                                                                                                                                                                                                                                                                                                                                                                             | National HIV Reference Laboratory, Ministry of Health, Public Health Institute of Malawi                       | KRISP, KZN Research Innovation and Sequencing Platform                                                                                                      | Mvula B, Chilima B, Chiwaula M, Mwangomba W, Panja L, Kasambara W, Auld A, Kim L, Kampira E, Kaba M, Wadonda N, Maida A, Giandhari J, Pillay S, Naidoo Y, Lessells R, Emmanuel SJ, Tegally H, Wilkinson E, de Oliveira T                                                                                                                                                                                                                                                |
| EPI_ISL_1407529, EPI_ISL_1407642                                                                                                                                                                                                                                                                                                                                                                                                                                                                            | Viollier AG                                                                                                    | Department of Biosystems Science and Engineering, ETH Zürich                                                                                                | Chaoran Chen, Sarah Nadeau, Catharine Aquino, Ivan Topolsky, Philipp Jablonski, Lara Fuhrmann, David Dreifuss, Katharina Jahn, Andreia Cabral de Gouvea, Maria Domenica Moccia, Simon Grüter, Timothy Sykes, Lennart Opitz, Griffin White, Laura Neff, Doris Popovic, Andrea Patignani, Jay Tracy, Ralph Schlapbach, Christiane Beckmann, Maurice Redondo, Olivier Kobel, Christoph Noppen, Sophie Seidel, Noemie Santamaria de Souza, Niko Beerenwinkel, Tanja Stadler |
| EPI_ISL_1407796                                                                                                                                                                                                                                                                                                                                                                                                                                                                                             | Viollier AG                                                                                                    | Department of Biosystems Science and Engineering, ETH Zürich                                                                                                | Chaoran Chen, Sarah Nadeau, Ivan Topolsky, Emmanouil Dermizakis, Keith Harshman, Ioannis Xenarios, Henri Pegeot, Lorenzo Cerutti, Deborah Penet, Philipp Jablonski, Lara Fuhrmann, David Dreifuss, Katharina Jahn, Christiane Beckmann, Maurice Redondo, Olivier Kobel, Christoph Noppen, Sophie Seidel, Noemie Santamaria de Souza, Niko Beerenwinkel, Tanja Stadler                                                                                                   |

|                                                                                                                                                                                                                                                                                                                                   |                                                                                                 |                                                                                                                                                              |                                                                                                                                                                                                                                                                                                                                                                                                                                                                          |
|-----------------------------------------------------------------------------------------------------------------------------------------------------------------------------------------------------------------------------------------------------------------------------------------------------------------------------------|-------------------------------------------------------------------------------------------------|--------------------------------------------------------------------------------------------------------------------------------------------------------------|--------------------------------------------------------------------------------------------------------------------------------------------------------------------------------------------------------------------------------------------------------------------------------------------------------------------------------------------------------------------------------------------------------------------------------------------------------------------------|
| EPI_ISL_1407881                                                                                                                                                                                                                                                                                                                   | Viollier AG                                                                                     | Department of Biosystems Science and Engineering, ETH Zürich                                                                                                 | Chaoran Chen, Sarah Nadeau, Catharine Aquino, Ivan Topolsky, Philipp Jablonski, Lara Fuhrmann, David Dreifuss, Katharina Jahn, Andreia Cabral de Gouvea, Maria Domenica Moccia, Simon Grüter, Timothy Sykes, Lennart Opitz, Griffin White, Laura Neff, Doris Popovic, Andrea Patrignani, Jay Tracy, Ralph Schlapbach, Christiane Beckmann, Maurice Redondo, Olivier Kobel, Christoph Noppen, Sophie Seidel, Noemie Santamaria de Souza, Niko Beerenwinkel, Tanja Stadler |
| EPI_ISL_1407911                                                                                                                                                                                                                                                                                                                   | Viollier AG                                                                                     | Department of Biosystems Science and Engineering, ETH Zürich                                                                                                 | Chaoran Chen, Sarah Nadeau, Ivan Topolsky, Emmanouil Dermitzakis, Keith Harshman, Ioannis Xenarios, Henri Pegeot, Lorenzo Cerutti, Deborah Penet, Philipp Jablonski, Lara Fuhrmann, David Dreifuss, Katharina Jahn, Christiane Beckmann, Maurice Redondo, Olivier Kobel, Christoph Noppen, Sophie Seidel, Noemie Santamaria de Souza, Niko Beerenwinkel, Tanja Stadler                                                                                                   |
| EPI_ISL_1407947, EPI_ISL_1408014, EPI_ISL_1408165, EPI_ISL_1408262, EPI_ISL_1408341                                                                                                                                                                                                                                               | Viollier AG                                                                                     | Department of Biosystems Science and Engineering, ETH Zürich                                                                                                 | Chaoran Chen, Sarah Nadeau, Catharine Aquino, Ivan Topolsky, Philipp Jablonski, Lara Fuhrmann, David Dreifuss, Katharina Jahn, Andreia Cabral de Gouvea, Maria Domenica Moccia, Simon Grüter, Timothy Sykes, Lennart Opitz, Griffin White, Laura Neff, Doris Popovic, Andrea Patrignani, Jay Tracy, Ralph Schlapbach, Christiane Beckmann, Maurice Redondo, Olivier Kobel, Christoph Noppen, Sophie Seidel, Noemie Santamaria de Souza, Niko Beerenwinkel, Tanja Stadler |
| EPI_ISL_1408898                                                                                                                                                                                                                                                                                                                   | TN Division of Laboratory Services                                                              | Genomics and Discovery, Respiratory Viruses Branch, Division of Viral Diseases, Centers for Disease Control and Prevention                                   | Ying Tao, Jing Zhang, Yan Li, Brian Lynch, Anna Kelleher, Krista Queen, Anna Uehara, Peter Cook, Han Jia Justin Ng, Clinton R. Paden, Habib Wang, Suxiang Tong                                                                                                                                                                                                                                                                                                           |
| EPI_ISL_1410717                                                                                                                                                                                                                                                                                                                   | 1. Główny Inspektorat Sanitarny. 2. Diagnostyka. Laboratoria Medyczne.                          | 1. ViroGenetics - BSL3 Laboratory of Virology, Malopolska Centre of Biotechnology, Jagiellonian University; 2. genXone SA, Research & Development Laboratory | Mazur-Panasiuk,N., Grzegorz Nowicki, Gromowski,T., Natalia Drweska-Matelska, Jakub Grabowski, Anna Brylak, Aleksandra Gidlewicz, Karol Szeszko, Maciej Sykułski, Lukasz Krych, Kowalski,M., Szulc,P., Sylwia Januszczak, Labaj,P.P., Michal Kaszuba, Pyrc,K.                                                                                                                                                                                                             |
| EPI_ISL_1411527, EPI_ISL_1411531, EPI_ISL_1411606                                                                                                                                                                                                                                                                                 | 1. Główny Inspektorat Sanitarny. 2. Diagnostyka. Laboratoria Medyczne.                          | 1. ViroGenetics - BSL3 Laboratory of Virology, Malopolska Centre of Biotechnology, Jagiellonian University; 2. genXone SA, Research & Development Laboratory | Natalia Mazur-Panasiuk, Grzegorz Nowicki, Tomasz Gromowski, Natalia Drweska-Matelska, Jakub Grabowski, Anna Brylak, Aleksandra Gidlewicz, Karol Szeszko, Maciej Sykułski, Lukasz Krych, Michal Kowalski, Piotr Szulc, Sylwia Januszczak, Pawel P Labaj, Michal Kaszuba, Krzysztof Pyrc                                                                                                                                                                                   |
| EPI_ISL_1413209, EPI_ISL_1413212, EPI_ISL_1413218, EPI_ISL_1413293, EPI_ISL_1413328, EPI_ISL_1413330, EPI_ISL_1413341, EPI_ISL_1413344, EPI_ISL_1413352, EPI_ISL_1413361, EPI_ISL_1413363                                                                                                                                         | see above                                                                                       | Broad Institute Clinical Research Sequencing Platform                                                                                                        | Infecious Disease Program, Broad Institute of Harvard and MIT                                                                                                                                                                                                                                                                                                                                                                                                            |
| EPI_ISL_1413935                                                                                                                                                                                                                                                                                                                   | Instituto Nacional de Saude (INSA) and Instituto Gulbenkian de Ciencia (IGC)                    | Instituto Nacional de Saude (INSA) and Instituto Gulbenkian de Ciencia (IGC)                                                                                 | Siddle,K.J., Adams,G., Pearlman,L., Gladden-Young,A., Vicente,G., Blumenstiel,B., DeFelicce,M., Lee,M., McGovern,S., Lagerborg,K., Rudy,M., DeRuff,K., Carter,A., Normandin,E., Bauer,M., Reilly,S., Tomkins-Tinch,C., Loreth,C., Chaluvadi,S., Meldrum,J., Granger,B., Lemieux,J.E., Birren,B.W., Sabeti,P.C., Larkin,K., Dodge,S., Lennon,N., Madoff,L., Brown,C., Gallagher,G., Smole,S., Park,D.J., Gabriel,S., and MacInnis,B.L.                                    |
| EPI_ISL_1415171, EPI_ISL_1415244, EPI_ISL_1415326, EPI_ISL_1415329, EPI_ISL_1415346, EPI_ISL_1415383                                                                                                                                                                                                                              | National Centre For Cell Science                                                                | National Centre For Cell Science - INSACOG                                                                                                                   | Borges et al                                                                                                                                                                                                                                                                                                                                                                                                                                                             |
| EPI_ISL_1416128                                                                                                                                                                                                                                                                                                                   | Randox Laboratories                                                                             | Wellcome Sanger Institute for the COVID-19 Genomics UK (COG-UK) Consortium                                                                                   | Dhiraj Paul, Mittal Inamdar, Sonal Manik Chavan, Mohak P Gujare, Shivang P. Bhanushali, Manoj Kumar Bhat, Ajay Pillai, INSACOG Consortium team, Yogesh Shouche.                                                                                                                                                                                                                                                                                                          |
| EPI_ISL_1416191                                                                                                                                                                                                                                                                                                                   | Fakultas Kedokteran Universitas Sumatera Utara                                                  | National Institute of Health Research and Development                                                                                                        | Randox Laboratories and Alex Alderton, Roberto Amato, Jeffrey Barrett, Sonia Goncalves, Ewan Harrison, David K. Jackson, Ian Johnston, Dominic Kwiatkowski, Cordelia Langford, John Sillitoe on behalf of the Wellcome Sanger Institute COVID-19 Surveillance Team                                                                                                                                                                                                       |
| EPI_ISL_1416837                                                                                                                                                                                                                                                                                                                   | Labo Analyses Med                                                                               | National Reference Center for Viruses of Respiratory Infections, Institut Pasteur, Paris                                                                     | Vivi Setiawaty, Hana Apsari Pawestri, Subangkit, Kartika Dewi Puspa, Arie Ardiansyah Nugraha, Hartanti Dian Ikawati, Nelly Puspandari, Krisna Nur Andriana Pangesti                                                                                                                                                                                                                                                                                                      |
| EPI_ISL_1416927                                                                                                                                                                                                                                                                                                                   | Hospital                                                                                        | National Reference Center for Viruses of Respiratory Infections, Institut Pasteur, Paris                                                                     | Marion Barbet, Sylvie Behillil, Méline Bizard,Frédéric Lemoine,Corinne Maufrais,Christophe Malabat, Angela Brisebarre, Camille Capel, Louise Lefrançois, Etienne Simon-Lorière, Vincent Enouf, Maud Vanpeene, Sylvie van der Werf,Sophie Chalmir                                                                                                                                                                                                                         |
| EPI_ISL_1417024                                                                                                                                                                                                                                                                                                                   | Hospital                                                                                        | National Reference Center for Viruses of Respiratory Infections, Institut Pasteur, Paris                                                                     | Marion Barbet, Sylvie Behillil, Méline Bizard,Frédéric Lemoine,Corinne Maufrais,Christophe Malabat, Angela Brisebarre, Camille Capel, Louise Lefrançois, Etienne Simon-Lorière, Vincent Enouf, Maud Vanpeene, Sylvie van der Werf,FrancOise Lunel Fabiani                                                                                                                                                                                                                |
| EPI_ISL_1417026                                                                                                                                                                                                                                                                                                                   | Labo Analyses Med                                                                               | National Reference Center for Viruses of Respiratory Infections, Institut Pasteur, Paris                                                                     | Marion Barbet, Sylvie Behillil, Méline Bizard,Frédéric Lemoine,Corinne Maufrais,Christophe Malabat, Angela Brisebarre, Camille Capel, Louise Lefrançois, Etienne Simon-Lorière, Vincent Enouf, Maud Vanpeene, Sylvie van der Werf,Jean-FrançOis Comes                                                                                                                                                                                                                    |
| EPI_ISL_1417163                                                                                                                                                                                                                                                                                                                   | Labo Analyses Med                                                                               | National Reference Center for Viruses of Respiratory Infections, Institut Pasteur, Paris                                                                     | Marion Barbet, Sylvie Behillil, Méline Bizard,Frédéric Lemoine,Corinne Maufrais,Christophe Malabat, Angela Brisebarre, Camille Capel, Louise Lefrançois, Etienne Simon-Lorière, Vincent Enouf, Maud Vanpeene, Sylvie van der Werf,CéLine Bressollette                                                                                                                                                                                                                    |
| EPI_ISL_1417175                                                                                                                                                                                                                                                                                                                   | Labo Analyses Med                                                                               | National Reference Center for Viruses of Respiratory Infections, Institut Pasteur, Paris                                                                     | Marion Barbet, Sylvie Behillil, Méline Bizard,Frédéric Lemoine,Corinne Maufrais,Christophe Malabat, Angela Brisebarre, Camille Capel, Louise Lefrançois, Etienne Simon-Lorière, Vincent Enouf, Maud Vanpeene, Sylvie van der Werf,OphéLie Said-Delattre                                                                                                                                                                                                                  |
| EPI_ISL_1417214                                                                                                                                                                                                                                                                                                                   | Labo Analyses Med                                                                               | National Reference Center for Viruses of Respiratory Infections, Institut Pasteur, Paris                                                                     | Marion Barbet, Sylvie Behillil, Méline Bizard,Frédéric Lemoine,Corinne Maufrais,Christophe Malabat, Angela Brisebarre, Camille Capel, Louise Lefrançois, Etienne Simon-Lorière, Vincent Enouf, Maud Vanpeene, Sylvie van der Werf,OphéLie Said-Delattre                                                                                                                                                                                                                  |
| EPI_ISL_1418237                                                                                                                                                                                                                                                                                                                   | CNR Virus des Infections Respiratoires - France SUD                                             | CNR Virus des Infections Respiratoires - France SUD                                                                                                          | Antonin Bal, Gregory Destras, Gwendolyne Burfin, Hadrien Regue, Quentin Semanas, Martine Valette, Bruno Lina, Laurence Josset                                                                                                                                                                                                                                                                                                                                            |
| EPI_ISL_1418253                                                                                                                                                                                                                                                                                                                   | LABORATOIRE BOUVIER                                                                             | CNR Virus des Infections Respiratoires - France SUD                                                                                                          | Antonin Bal, Gregory Destras, Gwendolyne Burfin, Hadrien Regue, Quentin Semanas, Martine Valette, Bruno Lina, Laurence Josset                                                                                                                                                                                                                                                                                                                                            |
| EPI_ISL_1418264                                                                                                                                                                                                                                                                                                                   | CNR Virus des Infections Respiratoires - France SUD                                             | CNR Virus des Infections Respiratoires - France SUD                                                                                                          | Antonin Bal, Gregory Destras, Gwendolyne Burfin, Hadrien Regue, Quentin Semanas, Martine Valette, Bruno Lina, Laurence Josset                                                                                                                                                                                                                                                                                                                                            |
| EPI_ISL_1418309, EPI_ISL_1418319, EPI_ISL_1418321                                                                                                                                                                                                                                                                                 | National Institute of Infectious Diseases-Prof. Dr. Matei Bals Molecular Diagnostics Laboratory | National Institute of Infectious Diseases-Prof. Dr. Matei Bals Molecular Diagnostics Laboratory                                                              | Corina Casanguiu, Leontina Banica, Marius Surleac, Ovidiu Vlaicu, Ionelia Nicolae, Simona Paraschiv, Dan Otelea                                                                                                                                                                                                                                                                                                                                                          |
| EPI_ISL_1418324                                                                                                                                                                                                                                                                                                                   | Clinical Infectious Diseases Hospital Constana                                                  | National Institute of Infectious Diseases-Prof. Dr. Matei Bals Molecular Diagnostics Laboratory                                                              | Corina Casanguiu, Leontina Banica, Marius Surleac, Ovidiu Vlaicu, Ionelia Nicolae, Simona Paraschiv, Dan Otelea                                                                                                                                                                                                                                                                                                                                                          |
| EPI_ISL_1419050, EPI_ISL_1419409, EPI_ISL_1419414, EPI_ISL_1419415, EPI_ISL_1419513, EPI_ISL_1419545, EPI_ISL_1419578, EPI_ISL_1419583, EPI_ISL_1419595, EPI_ISL_1419600, EPI_ISL_1419612, EPI_ISL_1419621, EPI_ISL_1419622, EPI_ISL_1419627, EPI_ISL_1419770, EPI_ISL_1419810, EPI_ISL_1419850, EPI_ISL_1419851, EPI_ISL_1419912 | see above                                                                                       | INSACOG-WB                                                                                                                                                   | Arindam Maitra, Bhaswati Bandyopadhyay, Nidhan Kumar Biswas, Tamal Ghosh, Sreedhar Chinnaswamy, Ajay Chakraborti, Saumitra Das                                                                                                                                                                                                                                                                                                                                           |
| EPI_ISL_1420646                                                                                                                                                                                                                                                                                                                   | AHEPA, Laboratory of Microbiology                                                               | Greek Genome Center, Biomedical Research Foundation of the Academy of Athens (BRFAA)                                                                         | Emmanouil Athanasiadis, Ioannis Vatsellas, Theodoros Loupis, Katerina Zoi, LEMONIA Skoura, Dimitrios Thanos                                                                                                                                                                                                                                                                                                                                                              |
| EPI_ISL_1420660                                                                                                                                                                                                                                                                                                                   | Laboratory of Clinical Virology                                                                 | Greek Genome Center, Biomedical Research Foundation of the Academy of Athens (BRFAA)                                                                         | Emmanouil Athanasiadis, Ioannis Vatsellas, Theodoros Loupis, Katerina Zoi, George Sourvinos, Dimitrios Thanos                                                                                                                                                                                                                                                                                                                                                            |
| EPI_ISL_1420701                                                                                                                                                                                                                                                                                                                   | Biomedical Research Foundation of the Academy of Athens (BRFAA)                                 | Greek Genome Center, Biomedical Research Foundation of the Academy of Athens (BRFAA)                                                                         | Emmanouil Athanasiadis, Ioannis Vatsellas, Theodoros Loupis, Katerina Zoi, Dimitrios Thanos                                                                                                                                                                                                                                                                                                                                                                              |
| EPI_ISL_1420726, EPI_ISL_1420728, EPI_ISL_1420729                                                                                                                                                                                                                                                                                 | Laboratory of Immunohematology, Division of Hematology                                          | Greek Genome Center, Biomedical Research Foundation of the Academy of Athens (BRFAA)                                                                         | Emmanouil Athanasiadis, Ioannis Vatsellas, Theodoros Loupis, Katerina Zoi, Athanasia Mouzaki, Dimitrios Thanos                                                                                                                                                                                                                                                                                                                                                           |
| EPI_ISL_1420740, EPI_ISL_1420746, EPI_ISL_1420752, EPI_ISL_1420754, EPI_ISL_1420756, EPI_ISL_1420786                                                                                                                                                                                                                              | Biomedical Research Foundation of the Academy of Athens (BRFAA)                                 | Greek Genome Center, Biomedical Research Foundation of the Academy of Athens (BRFAA)                                                                         | Emmanouil Athanasiadis, Ioannis Vatsellas, Theodoros Loupis, Katerina Zoi, Dimitrios Thanos                                                                                                                                                                                                                                                                                                                                                                              |
| EPI_ISL_1420841, EPI_ISL_1420851, EPI_ISL_1420887, EPI_ISL_1420892, EPI_ISL_1420902, EPI_ISL_1420923, EPI_ISL_1420961, EPI_ISL_1420970, EPI_ISL_1421148, EPI_ISL_1421193, EPI_ISL_1421199, EPI_ISL_1421262, EPI_ISL_1421361                                                                                                       | see above                                                                                       | Helix/Illumina                                                                                                                                               | Peter W. Cook, Dakota Howard, Dhwanj Batra, Ben L. Rambo-Martin, Eileen de Feo, Jan Antico, Christine Tran, Matthew Tolentino, Shannon Wickline, Kim Getzgen, Brad Sickler, Jingtao Liu, Eric Allen, Phil Febbo, Summer Galloway, Nicole L. Washington, Simon White, Geraint Levan, Kelly Schiabor Barrett, Elizabeth Cirulli, Alexandre Bolze, Ary Ascencio, Charlotte Rivera-Garcia, Ryan Cho, Jason Nguyen, Sherry Wang, Jimmy Ramirez, Tyler Cassens, Eren           |

|                                                                                                                                                                                                                                                                                                                                                                                                                                                                                                                                                                                                                                                                                                                                                                                                                                                                                                                                                                                                                                                                                                                                                                                                                                                       |                                                                                                                                                                                                                              |                                                                                                                                                                                                                                                                                                                                                                                                                                                                                                                                                                                                                                                                                                                                                                                                                                                                                                         |                                                                                                                                                                                                                                                                                                                                                                                                                                                                                                                                                                                                                                                                                                                                                                                                                                                                                                         |
|-------------------------------------------------------------------------------------------------------------------------------------------------------------------------------------------------------------------------------------------------------------------------------------------------------------------------------------------------------------------------------------------------------------------------------------------------------------------------------------------------------------------------------------------------------------------------------------------------------------------------------------------------------------------------------------------------------------------------------------------------------------------------------------------------------------------------------------------------------------------------------------------------------------------------------------------------------------------------------------------------------------------------------------------------------------------------------------------------------------------------------------------------------------------------------------------------------------------------------------------------------|------------------------------------------------------------------------------------------------------------------------------------------------------------------------------------------------------------------------------|---------------------------------------------------------------------------------------------------------------------------------------------------------------------------------------------------------------------------------------------------------------------------------------------------------------------------------------------------------------------------------------------------------------------------------------------------------------------------------------------------------------------------------------------------------------------------------------------------------------------------------------------------------------------------------------------------------------------------------------------------------------------------------------------------------------------------------------------------------------------------------------------------------|---------------------------------------------------------------------------------------------------------------------------------------------------------------------------------------------------------------------------------------------------------------------------------------------------------------------------------------------------------------------------------------------------------------------------------------------------------------------------------------------------------------------------------------------------------------------------------------------------------------------------------------------------------------------------------------------------------------------------------------------------------------------------------------------------------------------------------------------------------------------------------------------------------|
|                                                                                                                                                                                                                                                                                                                                                                                                                                                                                                                                                                                                                                                                                                                                                                                                                                                                                                                                                                                                                                                                                                                                                                                                                                                       |                                                                                                                                                                                                                              |                                                                                                                                                                                                                                                                                                                                                                                                                                                                                                                                                                                                                                                                                                                                                                                                                                                                                                         | Sandoval, Magnus Isaksson, William Lee, David Becker, Marc Laurent, James Lu, Clinton R. Paden, Suxiang Tong, Duncan MacCannell                                                                                                                                                                                                                                                                                                                                                                                                                                                                                                                                                                                                                                                                                                                                                                         |
| EPI_ISL_1421393                                                                                                                                                                                                                                                                                                                                                                                                                                                                                                                                                                                                                                                                                                                                                                                                                                                                                                                                                                                                                                                                                                                                                                                                                                       | Wisconsin State Laboratory of Hygiene Communicable Disease Division                                                                                                                                                          | Wisconsin State Laboratory of Hygiene Communicable Disease Division                                                                                                                                                                                                                                                                                                                                                                                                                                                                                                                                                                                                                                                                                                                                                                                                                                     | Kelsey R. Florek, Abigail C. Shockey                                                                                                                                                                                                                                                                                                                                                                                                                                                                                                                                                                                                                                                                                                                                                                                                                                                                    |
| EPI_ISL_1421569, EPI_ISL_1421634, EPI_ISL_1421710, EPI_ISL_1421754                                                                                                                                                                                                                                                                                                                                                                                                                                                                                                                                                                                                                                                                                                                                                                                                                                                                                                                                                                                                                                                                                                                                                                                    | Helix/Illumina                                                                                                                                                                                                               | Centers for Disease Control and Prevention Division of Viral Diseases, Pathogen Discovery                                                                                                                                                                                                                                                                                                                                                                                                                                                                                                                                                                                                                                                                                                                                                                                                               | Peter W. Cook, Dakota Howard, Dhvani Batra, Ben L. Rambo-Martin, Eileen de Feo, Jan Antico, Christine Tran, Matthew Tolentino, Shannon Wickline, Kim Gletzen, Brad Sickler, Jingtao Liu, Eric Allen, Phil Febbo, Summer Galloway, Nicole L. Washington, Simon White, Geraint Levan, Kelly Schiabor Barrett, Elizabeth Cirulli, Alexandre Bolze, Ary Ascencio, Charlotte Rivera-Garcia, Ryan Cho, Jason Nguyen, Sherry Wang, Jimmy Ramirez, Tyler Cassens, Efrén Sandoval, Magnus Isaksson, William Lee, David Becker, Marc Laurent, James Lu, Clinton R. Paden, Suxiang Tong, Duncan MacCannell                                                                                                                                                                                                                                                                                                         |
| EPI_ISL_1421759, EPI_ISL_1421761, EPI_ISL_1421810, EPI_ISL_1421830, EPI_ISL_1421844, EPI_ISL_1421846, EPI_ISL_1421850, EPI_ISL_1421852, EPI_ISL_1421853, EPI_ISL_1421855, EPI_ISL_1421857, EPI_ISL_1421865, EPI_ISL_1421885, EPI_ISL_1421892, EPI_ISL_1421903, EPI_ISL_1421910, EPI_ISL_1421911, EPI_ISL_1421912, EPI_ISL_1421913, EPI_ISL_1421917, EPI_ISL_1421920, EPI_ISL_1421929, EPI_ISL_1421933, EPI_ISL_1421935, EPI_ISL_1421939, EPI_ISL_1421940, EPI_ISL_1421941, EPI_ISL_1421942, EPI_ISL_1421954, EPI_ISL_1421956, EPI_ISL_1421961, EPI_ISL_1421966, EPI_ISL_1421977, EPI_ISL_1421981, EPI_ISL_1421986, EPI_ISL_1421996, EPI_ISL_1421997, EPI_ISL_1422001, EPI_ISL_1422004, EPI_ISL_1422007, EPI_ISL_1422019, EPI_ISL_1422029, EPI_ISL_1422032, EPI_ISL_1422033, EPI_ISL_1422040, EPI_ISL_1422047, EPI_ISL_1422063, EPI_ISL_1422064, EPI_ISL_1422066, EPI_ISL_1422067, EPI_ISL_1422075, EPI_ISL_1422083, EPI_ISL_1422086, EPI_ISL_1422093, EPI_ISL_1422104, EPI_ISL_1422106, EPI_ISL_1422111, EPI_ISL_1422114, EPI_ISL_1422128, EPI_ISL_1422129, EPI_ISL_1422133, EPI_ISL_1422138, EPI_ISL_1422147, EPI_ISL_1422148, EPI_ISL_1422169, EPI_ISL_1422171, EPI_ISL_1422172, EPI_ISL_1422185, EPI_ISL_1422192, EPI_ISL_1422193, EPI_ISL_1422208 | Centers for Disease Control and Prevention Division of Viral Diseases, Pathogen Discovery                                                                                                                                    | Peter W. Cook, Dakota Howard, Dhvani Batra, Ben L. Rambo-Martin, Minoo Agarwal, Eyad Almasri, Debbie Boles, Ayla Burns, Nuthawin Charoensri, Oren Cohen, Susan Countryman, Mary Ann Cristobal, Bobbi Croy, Suzanne Dale, Hrushikesh Deshmukh, Amanda Douglas, Vincent Drouillon, Marcia Eisenberg, Howard Engler, Rama Ghatti, Prashant Gupta, Susan Hicks, Jake Humphrey, Lax Iyer, Manoj Jain, Mohan Kolli, Brian Krueger, Tim Kuphal, Stanley Letovsky, Michael Levandoski, Craig Lukasik, Jonathan Meltzer, Brian Norvell, Mindy Nye, Scott Parker, Christos Protopoulos, John Pruitt, Steven Ragan, Scott Ryan, Mike Sapeta, Jana Schroth, Suresh Babu Selvaraju, Goran Stevovic, Amanda Suchanek, Andrea Throop, Lyndon Tilson, Thomas Urban, Joe Voshell, Kimberly Wagner, Jonathan Williams, Mary Williamson, Qian Zeng, Tricia Zwiefelhofer, Clinton R. Paden, Suxiang Tong, Duncan MacCannell |                                                                                                                                                                                                                                                                                                                                                                                                                                                                                                                                                                                                                                                                                                                                                                                                                                                                                                         |
| see above                                                                                                                                                                                                                                                                                                                                                                                                                                                                                                                                                                                                                                                                                                                                                                                                                                                                                                                                                                                                                                                                                                                                                                                                                                             | Laboratory Corporation of America                                                                                                                                                                                            | Centers for Disease Control and Prevention Division of Viral Diseases, Pathogen Discovery                                                                                                                                                                                                                                                                                                                                                                                                                                                                                                                                                                                                                                                                                                                                                                                                               | Peter W. Cook, Dakota Howard, Dhvani Batra, Ben L. Rambo-Martin, Minoo Agarwal, Eyad Almasri, Debbie Boles, Ayla Burns, Nuthawin Charoensri, Oren Cohen, Susan Countryman, Mary Ann Cristobal, Bobbi Croy, Suzanne Dale, Hrushikesh Deshmukh, Amanda Douglas, Vincent Drouillon, Marcia Eisenberg, Howard Engler, Rama Ghatti, Prashant Gupta, Susan Hicks, Jake Humphrey, Lax Iyer, Manoj Jain, Mohan Kolli, Brian Krueger, Tim Kuphal, Stanley Letovsky, Michael Levandoski, Craig Lukasik, Jonathan Meltzer, Brian Norvell, Mindy Nye, Scott Parker, Christos Protopoulos, John Pruitt, Steven Ragan, Scott Ryan, Mike Sapeta, Jana Schroth, Suresh Babu Selvaraju, Goran Stevovic, Amanda Suchanek, Andrea Throop, Lyndon Tilson, Thomas Urban, Joe Voshell, Kimberly Wagner, Jonathan Williams, Mary Williamson, Qian Zeng, Tricia Zwiefelhofer, Clinton R. Paden, Suxiang Tong, Duncan MacCannell |
| EPI_ISL_1422334, EPI_ISL_1422338, EPI_ISL_1422350, EPI_ISL_1422356, EPI_ISL_1422357, EPI_ISL_1422397, EPI_ISL_1422400, EPI_ISL_1422402, EPI_ISL_1422419, EPI_ISL_1422422, EPI_ISL_1422423, EPI_ISL_1422424, EPI_ISL_1422425, EPI_ISL_1422426, EPI_ISL_1422464, EPI_ISL_1422467, EPI_ISL_1422470, EPI_ISL_1422493, EPI_ISL_1422496, EPI_ISL_1422500, EPI_ISL_1422503, EPI_ISL_1422505, EPI_ISL_1422506, EPI_ISL_1422508, EPI_ISL_1422510, EPI_ISL_1422521, EPI_ISL_1422523, EPI_ISL_1422532, EPI_ISL_1422553, EPI_ISL_1422554, EPI_ISL_1422649, EPI_ISL_1422652, EPI_ISL_1422660, EPI_ISL_1422662, EPI_ISL_1422691, EPI_ISL_1422698, EPI_ISL_1422703, EPI_ISL_1422709, EPI_ISL_1422717, EPI_ISL_1422724, EPI_ISL_1422788, EPI_ISL_1422790, EPI_ISL_1422791, EPI_ISL_1422794, EPI_ISL_1422799, EPI_ISL_1422800, EPI_ISL_1422801, EPI_ISL_1422804, EPI_ISL_1422809, EPI_ISL_1422811, EPI_ISL_1422813, EPI_ISL_1422814, EPI_ISL_1422828, EPI_ISL_1422832, EPI_ISL_1422841, EPI_ISL_1422844, EPI_ISL_1422849, EPI_ISL_1422851, EPI_ISL_1422864, EPI_ISL_1422900, EPI_ISL_1422902, EPI_ISL_1422923, EPI_ISL_1422938, EPI_ISL_1422950, EPI_ISL_1422952, EPI_ISL_1422974, EPI_ISL_1422977                                                                     | Centers for Disease Control and Prevention Division of Viral Diseases, Pathogen Discovery                                                                                                                                    | Peter W. Cook, Dakota Howard, Dhvani Batra, Ben L. Rambo-Martin, S. H. Rosenthal, A. Gerasimova, R. M. Kagan, B. Anderson, M. Hua, Y. Liu, L.E. Bernstein, K.E. Livingston, A. Perez, I. A. Shlyakhter, R. V. Rolando, R. Owen, P. Tanpaiboon, F. Lacbawan, Clinton R. Paden, Suxiang Tong, Duncan MacCannell                                                                                                                                                                                                                                                                                                                                                                                                                                                                                                                                                                                           |                                                                                                                                                                                                                                                                                                                                                                                                                                                                                                                                                                                                                                                                                                                                                                                                                                                                                                         |
| see above                                                                                                                                                                                                                                                                                                                                                                                                                                                                                                                                                                                                                                                                                                                                                                                                                                                                                                                                                                                                                                                                                                                                                                                                                                             | Quest Diagnostics Incorporated                                                                                                                                                                                               | Centers for Disease Control and Prevention Division of Viral Diseases, Pathogen Discovery                                                                                                                                                                                                                                                                                                                                                                                                                                                                                                                                                                                                                                                                                                                                                                                                               | Peter W. Cook, Dakota Howard, Dhvani Batra, Ben L. Rambo-Martin, S. H. Rosenthal, A. Gerasimova, R. M. Kagan, B. Anderson, M. Hua, Y. Liu, L.E. Bernstein, K.E. Livingston, A. Perez, I. A. Shlyakhter, R. V. Rolando, R. Owen, P. Tanpaiboon, F. Lacbawan, Clinton R. Paden, Suxiang Tong, Duncan MacCannell                                                                                                                                                                                                                                                                                                                                                                                                                                                                                                                                                                                           |
| EPI_ISL_1423114                                                                                                                                                                                                                                                                                                                                                                                                                                                                                                                                                                                                                                                                                                                                                                                                                                                                                                                                                                                                                                                                                                                                                                                                                                       | Berkeley Medical Center                                                                                                                                                                                                      | WVU and Marshall University Combined Genomics Core Facilities                                                                                                                                                                                                                                                                                                                                                                                                                                                                                                                                                                                                                                                                                                                                                                                                                                           | "James Denvir, Peter Stoilov, Peter Perrotta, Wesley Kimble, Ryan Percifield"                                                                                                                                                                                                                                                                                                                                                                                                                                                                                                                                                                                                                                                                                                                                                                                                                           |
| EPI_ISL_1423194                                                                                                                                                                                                                                                                                                                                                                                                                                                                                                                                                                                                                                                                                                                                                                                                                                                                                                                                                                                                                                                                                                                                                                                                                                       | WVU Rapid Development Laboratory                                                                                                                                                                                             | WVU and Marshall University Combined Genomics Core Facilities                                                                                                                                                                                                                                                                                                                                                                                                                                                                                                                                                                                                                                                                                                                                                                                                                                           | "James Denvir, Peter Stoilov, Peter Perrotta, Wesley Kimble, Ryan Percifield"                                                                                                                                                                                                                                                                                                                                                                                                                                                                                                                                                                                                                                                                                                                                                                                                                           |
| EPI_ISL_1423388, EPI_ISL_1423403, EPI_ISL_1423414, EPI_ISL_1423431, EPI_ISL_1423436, EPI_ISL_1423439, EPI_ISL_1423440, EPI_ISL_1423442, EPI_ISL_1423444, EPI_ISL_1423445, EPI_ISL_1423447, EPI_ISL_1423448, EPI_ISL_1423449, EPI_ISL_1423451, EPI_ISL_1423465, EPI_ISL_1423478, EPI_ISL_1423490, EPI_ISL_1423491, EPI_ISL_1423499, EPI_ISL_1423501                                                                                                                                                                                                                                                                                                                                                                                                                                                                                                                                                                                                                                                                                                                                                                                                                                                                                                    | NYU Langone Health                                                                                                                                                                                                           | Departments of Pathology and Medicine, New York University School of Medicine                                                                                                                                                                                                                                                                                                                                                                                                                                                                                                                                                                                                                                                                                                                                                                                                                           | Adriana Heguy, Dacia Dimartino, Emily Guzman, Christian Marier, Peter Meyn, Sitharam Ramaswami, Gael Westby, Paul Zappile, Yutong Zhang, Paolo Cotzia, Guiqing Wang                                                                                                                                                                                                                                                                                                                                                                                                                                                                                                                                                                                                                                                                                                                                     |
| see above                                                                                                                                                                                                                                                                                                                                                                                                                                                                                                                                                                                                                                                                                                                                                                                                                                                                                                                                                                                                                                                                                                                                                                                                                                             | NYU Langone Health                                                                                                                                                                                                           | Departments of Pathology and Medicine, New York University School of Medicine                                                                                                                                                                                                                                                                                                                                                                                                                                                                                                                                                                                                                                                                                                                                                                                                                           | Adriana Heguy, Dacia Dimartino, Emily Guzman, Christian Marier, Peter Meyn, Sitharam Ramaswami, Gael Westby, Paul Zappile, Yutong Zhang, Paolo Cotzia, Guiqing Wang                                                                                                                                                                                                                                                                                                                                                                                                                                                                                                                                                                                                                                                                                                                                     |
| EPI_ISL_1423505                                                                                                                                                                                                                                                                                                                                                                                                                                                                                                                                                                                                                                                                                                                                                                                                                                                                                                                                                                                                                                                                                                                                                                                                                                       | Unidad de Patología Clínica                                                                                                                                                                                                  | Instituto de Diagnóstico y Referencia Epidemiológicos (INDRE)                                                                                                                                                                                                                                                                                                                                                                                                                                                                                                                                                                                                                                                                                                                                                                                                                                           | Claudia Wong-Arambula, Abril Rodríguez-Maldonado, Vanessa Rivero-Arredondo, Ariadna Medina-Benitez, Joaquín Quiroz-Mercado, Sergio Rangel-Guerrero, Natividad Cruz-Ortiz, Tatiana Nunez-García, Gisela Barrera-Badillo, Lucía Hernández-Rivas, Irma López-Martínez, Ernesto Ramírez-González.                                                                                                                                                                                                                                                                                                                                                                                                                                                                                                                                                                                                           |
| EPI_ISL_1423509, EPI_ISL_1423512                                                                                                                                                                                                                                                                                                                                                                                                                                                                                                                                                                                                                                                                                                                                                                                                                                                                                                                                                                                                                                                                                                                                                                                                                      | LESP Chihuahua                                                                                                                                                                                                               | Instituto de Diagnóstico y Referencia Epidemiológicos (INDRE)                                                                                                                                                                                                                                                                                                                                                                                                                                                                                                                                                                                                                                                                                                                                                                                                                                           | Claudia Wong-Arambula, Abril Rodríguez-Maldonado, Vanessa Rivero-Arredondo, Ariadna Medina-Benitez, Joaquín Quiroz-Mercado, Sergio Rangel-Guerrero, Natividad Cruz-Ortiz, Tatiana Nunez-García, Gisela Barrera-Badillo, Lucía Hernández-Rivas, Irma López-Martínez, Ernesto Ramírez-González.                                                                                                                                                                                                                                                                                                                                                                                                                                                                                                                                                                                                           |
| EPI_ISL_1423625                                                                                                                                                                                                                                                                                                                                                                                                                                                                                                                                                                                                                                                                                                                                                                                                                                                                                                                                                                                                                                                                                                                                                                                                                                       | Hospital Universitario Marqués de Valdecilla - IDIVAL (Santander, Cantabria)                                                                                                                                                 | SeqCOVID-SPAIN consortium/IBV(CSIC)                                                                                                                                                                                                                                                                                                                                                                                                                                                                                                                                                                                                                                                                                                                                                                                                                                                                     | Mónica Gozalo Margüello, María Eleicer Cano García, Jose Manuel Méndez Legaza, Daniel Pablo Marcos, Jesús Rodríguez Rodríguez, María Siller Ruiz and SeqCOVID-SPAIN consortium                                                                                                                                                                                                                                                                                                                                                                                                                                                                                                                                                                                                                                                                                                                          |
| EPI_ISL_1423656                                                                                                                                                                                                                                                                                                                                                                                                                                                                                                                                                                                                                                                                                                                                                                                                                                                                                                                                                                                                                                                                                                                                                                                                                                       | Servicio de Microbiología Clínica (Complejo Hospitalario de Navarra, Pamplona), Instituto de Investigación Sanitaria de Navarra (IdiSNA)                                                                                     | SeqCOVID-SPAIN consortium/IBV(CSIC)                                                                                                                                                                                                                                                                                                                                                                                                                                                                                                                                                                                                                                                                                                                                                                                                                                                                     | Carmen Ezpeleta Baquedano, Ana Navascués, Ana Miqueleiz and SeqCOVID-SPAIN consortium                                                                                                                                                                                                                                                                                                                                                                                                                                                                                                                                                                                                                                                                                                                                                                                                                   |
| EPI_ISL_1423872                                                                                                                                                                                                                                                                                                                                                                                                                                                                                                                                                                                                                                                                                                                                                                                                                                                                                                                                                                                                                                                                                                                                                                                                                                       | Servicio de Microbiología. Hospital Universitario Donostia. OSI Donostialdea. Área de Enfermedades Infecciosas, Grupo de Infección Respiratoria y Resistencia Antimicrobiana. Instituto de Investigación Sanitaria Bionostia | SeqCOVID-SPAIN consortium/IBV(CSIC)                                                                                                                                                                                                                                                                                                                                                                                                                                                                                                                                                                                                                                                                                                                                                                                                                                                                     | Gustavo Cilla Eguiluz, Milagrosa Montes Ros, Luis Piñeiro Vázquez, Ane Sorraín, Jose Maria Marimón and SeqCOVID-SPAIN consortium                                                                                                                                                                                                                                                                                                                                                                                                                                                                                                                                                                                                                                                                                                                                                                        |
| EPI_ISL_1424124                                                                                                                                                                                                                                                                                                                                                                                                                                                                                                                                                                                                                                                                                                                                                                                                                                                                                                                                                                                                                                                                                                                                                                                                                                       | Stanford Health Care                                                                                                                                                                                                         | Stanford University School of Medicine, Clinical Virology Laboratory                                                                                                                                                                                                                                                                                                                                                                                                                                                                                                                                                                                                                                                                                                                                                                                                                                    | Becky Jiang, Mamdouh Sibai, Daniel Solis, Fumiko Yamamoto, Michelle Verghese, ChunHong Huang, James Zehnder, Malaya K. Sahoo, and Benjamin A. Pinsky                                                                                                                                                                                                                                                                                                                                                                                                                                                                                                                                                                                                                                                                                                                                                    |
| EPI_ISL_1424383                                                                                                                                                                                                                                                                                                                                                                                                                                                                                                                                                                                                                                                                                                                                                                                                                                                                                                                                                                                                                                                                                                                                                                                                                                       | Istituto Zooprofilattico Sperimentale del Mezzogiorno                                                                                                                                                                        | TIGEM                                                                                                                                                                                                                                                                                                                                                                                                                                                                                                                                                                                                                                                                                                                                                                                                                                                                                                   | Antonio Grimaldi, Patrizia Annunziata, Francesco Panariello, Biancamaria Pierri, Claudia Tiberio, Valentina Bouche, Chiara Colantuono, Maria Concetta Cuomo, Denise Di Concilio, Lucio Di Filippo, Anna Manfredi, Marcello Salvi, Antonio Limone, Luigi Atripaldi, Pellegrino Cerino, Andrea Ballabio, Davide Cacchiarelli                                                                                                                                                                                                                                                                                                                                                                                                                                                                                                                                                                              |
| EPI_ISL_1424429                                                                                                                                                                                                                                                                                                                                                                                                                                                                                                                                                                                                                                                                                                                                                                                                                                                                                                                                                                                                                                                                                                                                                                                                                                       | Università Federico II - Dipartimento di scienze mediche traslazionali - Napoli                                                                                                                                              | TIGEM                                                                                                                                                                                                                                                                                                                                                                                                                                                                                                                                                                                                                                                                                                                                                                                                                                                                                                   | Antonio Grimaldi, Patrizia Annunziata, Francesco Panariello, Michele Cennamo, Valentina Bouche, Chiara Colantuono, Lucio Di Filippo, Mariano Fiorenza, Anna Manfredi, Marcello Salvi, Giuseppe Portella, Andrea Ballabio, Davide Cacchiarelli                                                                                                                                                                                                                                                                                                                                                                                                                                                                                                                                                                                                                                                           |
| EPI_ISL_1424887, EPI_ISL_1424929, EPI_ISL_1425068                                                                                                                                                                                                                                                                                                                                                                                                                                                                                                                                                                                                                                                                                                                                                                                                                                                                                                                                                                                                                                                                                                                                                                                                     | Cialit Health Services Laboratories, Israel                                                                                                                                                                                  | Stern Lab                                                                                                                                                                                                                                                                                                                                                                                                                                                                                                                                                                                                                                                                                                                                                                                                                                                                                               | Stern Lab                                                                                                                                                                                                                                                                                                                                                                                                                                                                                                                                                                                                                                                                                                                                                                                                                                                                                               |
| EPI_ISL_1425378, EPI_ISL_1425384, EPI_ISL_1425537                                                                                                                                                                                                                                                                                                                                                                                                                                                                                                                                                                                                                                                                                                                                                                                                                                                                                                                                                                                                                                                                                                                                                                                                     | Department of Infectious Diseases, Kobe Institute of Health                                                                                                                                                                  | Department of Infectious Diseases, Kobe Institute of Health                                                                                                                                                                                                                                                                                                                                                                                                                                                                                                                                                                                                                                                                                                                                                                                                                                             | Ryohei Nomoto, Noriko Nakanishi, Tomotada Iwamoto, Tsuyoshi Sekizuka, Kentaro Itokawa, Rina Tanaka, Masanori Hashino, Makoto Kuroda                                                                                                                                                                                                                                                                                                                                                                                                                                                                                                                                                                                                                                                                                                                                                                     |
| EPI_ISL_1425554                                                                                                                                                                                                                                                                                                                                                                                                                                                                                                                                                                                                                                                                                                                                                                                                                                                                                                                                                                                                                                                                                                                                                                                                                                       | Laboratoria Medyczne Bruss grupa ALAB sp. z o.o. Medyczne Laboratorium Diagnostyczne                                                                                                                                         | 1. National Institute of Public Health - National Institute of Hygiene; 2. Eurofins Genomics Europe Sequencing GmbH                                                                                                                                                                                                                                                                                                                                                                                                                                                                                                                                                                                                                                                                                                                                                                                     | Wokowicz Tomasz, Zacharczuk Katarzyna, Sadkowska-Todys Magorzata, Gierczyki Rafa, Eurofins Genomics Europe Sequencing Team, ECDC COVID-19 WGS support team                                                                                                                                                                                                                                                                                                                                                                                                                                                                                                                                                                                                                                                                                                                                              |
| EPI_ISL_1425594, EPI_ISL_1425599                                                                                                                                                                                                                                                                                                                                                                                                                                                                                                                                                                                                                                                                                                                                                                                                                                                                                                                                                                                                                                                                                                                                                                                                                      | SARS-CoV-2 testing team, National Institute of Infectious Diseases                                                                                                                                                           | Pathogen Genomics Center, National Institute of Infectious Diseases                                                                                                                                                                                                                                                                                                                                                                                                                                                                                                                                                                                                                                                                                                                                                                                                                                     | Tsuyoshi Sekizuka, Kentaro Itokawa, Rina Tanaka, Masanori Hashino, Tadashi Kikuchi, Hiroshi Ishii, Shigeru Kusagawa, Makoto Kuroda                                                                                                                                                                                                                                                                                                                                                                                                                                                                                                                                                                                                                                                                                                                                                                      |
| EPI_ISL_1425612                                                                                                                                                                                                                                                                                                                                                                                                                                                                                                                                                                                                                                                                                                                                                                                                                                                                                                                                                                                                                                                                                                                                                                                                                                       | SARS-CoV-2 testing team, National Institute of Infectious Diseases                                                                                                                                                           | Pathogen Genomics Center, National Institute of Infectious Diseases                                                                                                                                                                                                                                                                                                                                                                                                                                                                                                                                                                                                                                                                                                                                                                                                                                     | Tsuyoshi Sekizuka, Kentaro Itokawa, Rina Tanaka, Masanori Hashino, Eri Nakayama, Motohiko Ogawa, Takahiro Maeki, Shigeru Tanjima, Chang-Kweng Lim, Makoto Kuroda                                                                                                                                                                                                                                                                                                                                                                                                                                                                                                                                                                                                                                                                                                                                        |
| EPI_ISL_1425699                                                                                                                                                                                                                                                                                                                                                                                                                                                                                                                                                                                                                                                                                                                                                                                                                                                                                                                                                                                                                                                                                                                                                                                                                                       | SARS-CoV-2 testing team, National Institute of Infectious Diseases                                                                                                                                                           | Pathogen Genomics Center, National Institute of Infectious Diseases                                                                                                                                                                                                                                                                                                                                                                                                                                                                                                                                                                                                                                                                                                                                                                                                                                     | Tsuyoshi Sekizuka, Kentaro Itokawa, Rina Tanaka, Masanori Hashino, Yoshihiro Kaku, Yasutaka Hoshino, Chikako Shimokawa, Eunsil Park, Tsuguto Fujimoto, Makoto Kuroda                                                                                                                                                                                                                                                                                                                                                                                                                                                                                                                                                                                                                                                                                                                                    |
| EPI_ISL_1426576                                                                                                                                                                                                                                                                                                                                                                                                                                                                                                                                                                                                                                                                                                                                                                                                                                                                                                                                                                                                                                                                                                                                                                                                                                       | SARS-CoV-2 testing team, National Institute of Infectious Diseases                                                                                                                                                           | Pathogen Genomics Center, National Institute of Infectious Diseases                                                                                                                                                                                                                                                                                                                                                                                                                                                                                                                                                                                                                                                                                                                                                                                                                                     | Tsuyoshi Sekizuka, Kentaro Itokawa, Rina Tanaka, Masanori Hashino, Daisuke Kobayashi, Kouso Wakae, Hussein H. Aly, Kento Fukano, Takanobu Kato, Makoto Kuroda                                                                                                                                                                                                                                                                                                                                                                                                                                                                                                                                                                                                                                                                                                                                           |
| EPI_ISL_1426585                                                                                                                                                                                                                                                                                                                                                                                                                                                                                                                                                                                                                                                                                                                                                                                                                                                                                                                                                                                                                                                                                                                                                                                                                                       | Saitama Prefectural Institute of Public Health                                                                                                                                                                               | Pathogen Genomics Center, National Institute of Infectious Diseases                                                                                                                                                                                                                                                                                                                                                                                                                                                                                                                                                                                                                                                                                                                                                                                                                                     | Tsuyoshi Sekizuka, Kentaro Itokawa, Rina Tanaka, Masanori Hashino, Daisuke Kobayashi, Kouso Wakae, Hussein H. Aly, Kento Fukano, Takanobu Kato, Makoto Kuroda                                                                                                                                                                                                                                                                                                                                                                                                                                                                                                                                                                                                                                                                                                                                           |
| EPI_ISL_1427573                                                                                                                                                                                                                                                                                                                                                                                                                                                                                                                                                                                                                                                                                                                                                                                                                                                                                                                                                                                                                                                                                                                                                                                                                                       | Kanagawa Prefectural Institute of Public Health                                                                                                                                                                              | Pathogen Genomics Center, National Institute of Infectious Diseases                                                                                                                                                                                                                                                                                                                                                                                                                                                                                                                                                                                                                                                                                                                                                                                                                                     | Tsuyoshi Sekizuka, Kentaro Itokawa, Rina Tanaka, Masanori Hashino, Daisuke Kobayashi, Kento Fukano, Hussein H. Aly, Takanobu Kato, Makoto Kuroda                                                                                                                                                                                                                                                                                                                                                                                                                                                                                                                                                                                                                                                                                                                                                        |

|                                                                                                                                        |                                                                                            | Diseases                                                                                   |                                                                                                                                                                                                                                                                                                                                                                                                                                                                                                                                                                                    | Kuroda |
|----------------------------------------------------------------------------------------------------------------------------------------|--------------------------------------------------------------------------------------------|--------------------------------------------------------------------------------------------|------------------------------------------------------------------------------------------------------------------------------------------------------------------------------------------------------------------------------------------------------------------------------------------------------------------------------------------------------------------------------------------------------------------------------------------------------------------------------------------------------------------------------------------------------------------------------------|--------|
| EPI_ISL_1427579, EPI_ISL_1427580, EPI_ISL_1427583                                                                                      | SARS-CoV-2 testing team, National Institute of Infectious Diseases                         | Pathogen Genomics Center, National Institute of Infectious Diseases                        | Tsuyoshi Sekizuka, Kentaro Itokawa, Rina Tanaka, Masanori Hashino, Daisuke Kobayashi, Kento Fukano, Hussein H. Aly, Takanobu Kato, , Makoto Kuroda                                                                                                                                                                                                                                                                                                                                                                                                                                 |        |
| EPI_ISL_1427590                                                                                                                        | Pathogen Genomics Center, National Institute of Infectious Diseases                        | Pathogen Genomics Center, National Institute of Infectious Diseases                        | Tsuyoshi Sekizuka, Kentaro Itokawa, Rina Tanaka, Masanori Hashino, Makoto Kuroda                                                                                                                                                                                                                                                                                                                                                                                                                                                                                                   |        |
| EPI_ISL_1427605                                                                                                                        | SARS-CoV-2 testing team, National Institute of Infectious Diseases                         | Pathogen Genomics Center, National Institute of Infectious Diseases                        | Tsuyoshi Sekizuka, Kentaro Itokawa, Rina Tanaka, Masanori Hashino, Daisuke Kobayashi, Koucho Wakae, Hussein H. Aly, Takanobu Kato, , Makoto Kuroda                                                                                                                                                                                                                                                                                                                                                                                                                                 |        |
| EPI_ISL_1428594                                                                                                                        | Niigata Prefectural Institute of Public Health and Environmental Sciences                  | Pathogen Genomics Center, National Institute of Infectious Diseases                        | Tsuyoshi Sekizuka, Kentaro Itokawa, Rina Tanaka, Masanori Hashino, Eri Nakayama, Motohiko Ogawa, Shigeru Tanjima, Takahiro Maeki, Chang-Kweng Lim, Makoto Kuroda                                                                                                                                                                                                                                                                                                                                                                                                                   |        |
| EPI_ISL_1428600                                                                                                                        | SARS-CoV-2 testing team, National Institute of Infectious Diseases                         | Pathogen Genomics Center, National Institute of Infectious Diseases                        | Tsuyoshi Sekizuka, Kentaro Itokawa, Rina Tanaka, Masanori Hashino, Eri Nakayama, Motohiko Ogawa, Shigeru Tanjima, Takahiro Maeki, Chang-Kweng Lim, Makoto Kuroda                                                                                                                                                                                                                                                                                                                                                                                                                   |        |
| EPI_ISL_1429589                                                                                                                        | SARS-CoV-2 testing team, National Institute of Infectious Diseases                         | Pathogen Genomics Center, National Institute of Infectious Diseases                        | Tsuyoshi Sekizuka, Kentaro Itokawa, Rina Tanaka, Masanori Hashino, Hidemasa Izumiya, Sunao Iyoda, Masatomo Morita, Nobuo Koizumi, , Makoto Kuroda                                                                                                                                                                                                                                                                                                                                                                                                                                  |        |
| EPI_ISL_1430578                                                                                                                        | SARS-CoV-2 testing team, National Institute of Infectious Diseases                         | Pathogen Genomics Center, National Institute of Infectious Diseases                        | Tsuyoshi Sekizuka, Kentaro Itokawa, Rina Tanaka, Masanori Hashino, Minoru Nagi, Ken Miyazawa, Takashi Sakudoh, Nozomu Hanaoka, Tsuguto Fujimoto, Makoto Kuroda                                                                                                                                                                                                                                                                                                                                                                                                                     |        |
| EPI_ISL_1430582, EPI_ISL_1430583                                                                                                       | Kanagawa Prefectural Institute of Public Health                                            | Pathogen Genomics Center, National Institute of Infectious Diseases                        | Tsuyoshi Sekizuka, Kentaro Itokawa, Rina Tanaka, Masanori Hashino, Minoru Nagi, Ken Miyazawa, Takashi Sakudoh, Nozomu Hanaoka, Tsuguto Fujimoto, Makoto Kuroda                                                                                                                                                                                                                                                                                                                                                                                                                     |        |
| EPI_ISL_1430585, EPI_ISL_1430587, EPI_ISL_1430597, EPI_ISL_1430610                                                                     | Osaka Institute of Public Health, Morinomiya Center                                        | Pathogen Genomics Center, National Institute of Infectious Diseases                        | Tsuyoshi Sekizuka, Kentaro Itokawa, Rina Tanaka, Masanori Hashino, Yoshihiro Kaku, Yasutaka Hoshino, Chikako Shimokawa, Eunsil Park, Tsuguto Fujimoto, Makoto Kuroda                                                                                                                                                                                                                                                                                                                                                                                                               |        |
| EPI_ISL_1430632                                                                                                                        | SARS-CoV-2 testing team, National Institute of Infectious Diseases                         | Pathogen Genomics Center, National Institute of Infectious Diseases                        | Tsuyoshi Sekizuka, Kentaro Itokawa, Rina Tanaka, Masanori Hashino, Yoshihiro Kaku, Yasutaka Hoshino, Chikako Shimokawa, Eunsil Park, Tsuguto Fujimoto, Makoto Kuroda                                                                                                                                                                                                                                                                                                                                                                                                               |        |
| EPI_ISL_1430649, EPI_ISL_1430661                                                                                                       | SARS-CoV-2 testing team, National Institute of Infectious Diseases                         | Pathogen Genomics Center, National Institute of Infectious Diseases                        | Tsuyoshi Sekizuka, Kentaro Itokawa, Rina Tanaka, Masanori Hashino, Eri Nakayama, Motohiko Ogawa, Takahiro Maeki, Shigeru Tanjima, Chang-Kweng Lim, Makoto Kuroda                                                                                                                                                                                                                                                                                                                                                                                                                   |        |
| EPI_ISL_1433295, EPI_ISL_1433297                                                                                                       | Pathogen Genomics Center, National Institute of Infectious Diseases                        | Pathogen Genomics Center, National Institute of Infectious Diseases                        | Tsuyoshi Sekizuka, Kentaro Itokawa, Rina Tanaka, Masanori Hashino, Makoto Kuroda                                                                                                                                                                                                                                                                                                                                                                                                                                                                                                   |        |
| EPI_ISL_1433834                                                                                                                        | CHU GRENOBLE                                                                               | CNR Virus des Infections Respiratoires - France SUD                                        | Antonin Bal, Gregory Destras, Gwendolyne Burfin, Hadrien Regue, Quentin Semanas, Martine Valette, Bruno Lina, Laurence Josset                                                                                                                                                                                                                                                                                                                                                                                                                                                      |        |
| EPI_ISL_1434178                                                                                                                        | UNILIANS DECINES                                                                           | CNR Virus des Infections Respiratoires - France SUD                                        | Antonin Bal, Gregory Destras, Gwendolyne Burfin, Hadrien Regue, Quentin Semanas, Martine Valette, Bruno Lina, Laurence Josset                                                                                                                                                                                                                                                                                                                                                                                                                                                      |        |
| EPI_ISL_1436015                                                                                                                        | Croatian Institute of Public Health                                                        | Croatian Institute of Public Health                                                        | Irena Tabain, Ivana Ferenak                                                                                                                                                                                                                                                                                                                                                                                                                                                                                                                                                        |        |
| EPI_ISL_1437722                                                                                                                        | Plateforme de testing Namuroise                                                            | Plateforme de testing Namuroise                                                            | ; Otto Gaetan ; Denis Olivier ; Degosserie Jonathan ; Mullier François                                                                                                                                                                                                                                                                                                                                                                                                                                                                                                             |        |
| EPI_ISL_1443031, EPI_ISL_1443038, EPI_ISL_1443039, EPI_ISL_1443063, EPI_ISL_1443090, EPI_ISL_1443091, EPI_ISL_1443107, EPI_ISL_1443152 | Instituto Nacional de Saude (INSA) and i3S - Instituto de Investigação e Inovação em Saúde | Instituto Nacional de Saude (INSA) and i3S - Instituto de Investigação e Inovação em Saúde | Borges et al                                                                                                                                                                                                                                                                                                                                                                                                                                                                                                                                                                       |        |
| EPI_ISL_1443235, EPI_ISL_1443252, EPI_ISL_1443272                                                                                      | Illinois Department of Public Health - Springfield Lab                                     | Illinois Department of Public Health - Springfield Lab                                     | Bryan Sim, Gordon McCall                                                                                                                                                                                                                                                                                                                                                                                                                                                                                                                                                           |        |
| EPI_ISL_1443591, EPI_ISL_1443592                                                                                                       | Teaching Institute for Public Health of Split-Dalmatia County                              | Croatian Institute of Public Health                                                        | Irena Tabain, Ivana Ferenak                                                                                                                                                                                                                                                                                                                                                                                                                                                                                                                                                        |        |
| EPI_ISL_1443724                                                                                                                        | Platform BIS UZA/UAntwerpen                                                                | Labo Klinische Biologie, UZA                                                               | Marie Le Mercier, Jasmine Coppens, Basil Britto Xavier, Christine Lammens, Veerle Matheeußen, Herman Goossens                                                                                                                                                                                                                                                                                                                                                                                                                                                                      |        |
| EPI_ISL_1443816                                                                                                                        | GA Department of Public Health                                                             | GA Department of Public Health                                                             | Stacy Reeves, Jonathan Edwards, Cynthia Dixey, Tonia Parrott, Aliyah Fields, Taylor Smith                                                                                                                                                                                                                                                                                                                                                                                                                                                                                          |        |
| EPI_ISL_1444916, EPI_ISL_1444917, EPI_ISL_1444922                                                                                      | Erie County Public Health (ECPHL)                                                          | University at Buffalo Genomics and Bioinformatics Core                                     | Jonathan Bard, Natalie Lamb, Alyssa Pohlman, Brandon Marzullo, Amanda Bocolucci, Norma Nowak, Donald Yergeau, Jennifer Surtees                                                                                                                                                                                                                                                                                                                                                                                                                                                     |        |
| EPI_ISL_1445043                                                                                                                        | Virginia Division of Consolidated Laboratory Services                                      | Virginia Division of Consolidated Laboratory Services                                      | Virginia DCLS                                                                                                                                                                                                                                                                                                                                                                                                                                                                                                                                                                      |        |
| EPI_ISL_1445105                                                                                                                        | PRONTO ATENDIMENTO VILA PADRE ANCHIETA                                                     | Instituto Butantan / Mendelics                                                             | Dimas Tadeu Covas, Sandra Coccuzzo Sampaio, Maria Carolina Elias, José Salvatore Leister Patané, Vincent Louis Viala, Antonio Jorge Martins, Ricardo Haddad, Claudia Renata dos Santos Barros, Elaine Cristina Marqueze, Raul Machado Neto, Debora Botequiu Moretti, Bibiana Santos, João Paulo Kitajima, Erika Freitas, David Schlesinger, Simone Kashima, Evandra Strazza Rodrigues, Svetoslav Nanev Slavov, Elaine Vieira dos Santos, Rafael dos Santos Bezerra, Luiz Carlos Junior de Alcantara, Marta Giovanetti, Vagner Fonseca, Flavia Aburjaile, Rodrigo Tocantins Calado. |        |
| EPI_ISL_1445119                                                                                                                        | UNIDADE RESPIRATORIA NOVA HORTOLANDIA                                                      | Instituto Butantan / Mendelics                                                             | Dimas Tadeu Covas, Sandra Coccuzzo Sampaio, Maria Carolina Elias, José Salvatore Leister Patané, Vincent Louis Viala, Antonio Jorge Martins, Ricardo Haddad, Claudia Renata dos Santos Barros, Elaine Cristina Marqueze, Raul Machado Neto, Debora Botequiu Moretti, Bibiana Santos, João Paulo Kitajima, Erika Freitas, David Schlesinger, Simone Kashima, Evandra Strazza Rodrigues, Svetoslav Nanev Slavov, Elaine Vieira dos Santos, Rafael dos Santos Bezerra, Luiz Carlos Junior de Alcantara, Marta Giovanetti, Vagner Fonseca, Flavia Aburjaile, Rodrigo Tocantins Calado. |        |
| EPI_ISL_1445130                                                                                                                        | PRONTO ATENDIMENTO DA PONTE DE SAO JOAO                                                    | Instituto Butantan / Mendelics                                                             | Dimas Tadeu Covas, Sandra Coccuzzo Sampaio, Maria Carolina Elias, José Salvatore Leister Patané, Vincent Louis Viala, Antonio Jorge Martins, Ricardo Haddad, Claudia Renata dos Santos Barros, Elaine Cristina Marqueze, Raul Machado Neto, Debora Botequiu Moretti, Bibiana Santos, João Paulo Kitajima, Erika Freitas, David Schlesinger, Simone Kashima, Evandra Strazza Rodrigues, Svetoslav Nanev Slavov, Elaine Vieira dos Santos, Rafael dos Santos Bezerra, Luiz Carlos Junior de Alcantara, Marta Giovanetti, Vagner Fonseca, Flavia Aburjaile, Rodrigo Tocantins Calado. |        |
| EPI_ISL_1445154                                                                                                                        | SAE SERVICO DE ATENDIMENTO ESPECIALIZADO                                                   | Instituto Butantan / Mendelics                                                             | Dimas Tadeu Covas, Sandra Coccuzzo Sampaio, Maria Carolina Elias, José Salvatore Leister Patané, Vincent Louis Viala, Antonio Jorge Martins, Ricardo Haddad, Claudia Renata dos Santos Barros, Elaine Cristina Marqueze, Raul Machado Neto, Debora Botequiu Moretti, Bibiana Santos, João Paulo Kitajima, Erika Freitas, David Schlesinger, Simone Kashima, Evandra Strazza Rodrigues, Svetoslav Nanev Slavov, Elaine Vieira dos Santos, Rafael dos Santos Bezerra, Luiz Carlos Junior de Alcantara, Marta Giovanetti, Vagner Fonseca, Flavia Aburjaile, Rodrigo Tocantins Calado. |        |
| EPI_ISL_1445185                                                                                                                        | PRONTO ATENDIMENTO SAO JOSE                                                                | Instituto Butantan / Mendelics                                                             | Dimas Tadeu Covas, Sandra Coccuzzo Sampaio, Maria Carolina Elias, José Salvatore Leister Patané, Vincent Louis Viala, Antonio Jorge Martins, Ricardo Haddad, Claudia Renata dos Santos Barros, Elaine Cristina Marqueze, Raul Machado Neto, Debora Botequiu Moretti, Bibiana Santos, João Paulo Kitajima, Erika Freitas, David Schlesinger, Simone Kashima, Evandra Strazza Rodrigues, Svetoslav Nanev Slavov, Elaine Vieira dos Santos, Rafael dos Santos Bezerra, Luiz Carlos Junior de Alcantara, Marta Giovanetti, Vagner Fonseca, Flavia Aburjaile, Rodrigo Tocantins Calado. |        |
| EPI_ISL_1445199                                                                                                                        | CENTRO DE SAUDE III SALES OLIVEIRA                                                         | Instituto Butantan / Mendelics                                                             | Dimas Tadeu Covas, Sandra Coccuzzo Sampaio, Maria Carolina Elias, José Salvatore Leister Patané, Vincent Louis Viala, Antonio Jorge Martins, Ricardo Haddad, Claudia Renata dos Santos Barros, Elaine Cristina Marqueze, Raul Machado Neto, Debora Botequiu Moretti, Bibiana Santos, João Paulo Kitajima, Erika Freitas, David Schlesinger, Simone Kashima, Evandra Strazza Rodrigues, Svetoslav Nanev Slavov, Elaine Vieira dos Santos, Rafael dos Santos Bezerra, Luiz Carlos Junior de Alcantara, Marta Giovanetti, Vagner Fonseca, Flavia Aburjaile, Rodrigo Tocantins Calado. |        |
| EPI_ISL_1445241                                                                                                                        | SECAO CENTRO DE DIAGNOSTICO SECEDI                                                         | Instituto Butantan / Mendelics                                                             | Dimas Tadeu Covas, Sandra Coccuzzo Sampaio, Maria Carolina Elias, José Salvatore Leister Patané, Vincent Louis Viala, Antonio Jorge Martins, Ricardo Haddad, Claudia Renata dos Santos Barros, Elaine Cristina Marqueze, Raul Machado Neto, Debora Botequiu Moretti, Bibiana Santos, João Paulo Kitajima, Erika Freitas, David Schlesinger, Simone Kashima, Evandra Strazza Rodrigues, Svetoslav Nanev Slavov, Elaine Vieira dos Santos, Rafael dos Santos Bezerra, Luiz Carlos Junior de Alcantara, Marta Giovanetti, Vagner Fonseca, Flavia Aburjaile, Rodrigo Tocantins Calado. |        |
| EPI_ISL_1446201, EPI_ISL_1446225                                                                                                       | Texas Children's Hospital                                                                  | Texas Children's Microbiome Center                                                         | Ruth Ann Luna, Jennifer K. Spinler, James Dunn, James Versalovic, Ila Singh                                                                                                                                                                                                                                                                                                                                                                                                                                                                                                        |        |
| EPI_ISL_1446945                                                                                                                        | TN Division of Laboratory Services                                                         | Centers for Disease Control and Prevention Division of Viral Diseases, Pathogen Discovery  | Mili Sheth, Sarah Nobles, Jasmine Padilla, Mark Burroughs, Shoshona Le, Katie Dillon, Peter Cook, Clinton R. Paden, Dhvani Batra, Krista Queen, Kristen Knipe, Dakota Howard, Yvette Unoarumhi, Darlene Wagner, Matthew Schmeier, Ben L. Rambo-Martin, Kristine Lacey, Sam Shepard, Alison Laufer Halpin,                                                                                                                                                                                                                                                                          |        |

|                                                                                                                                                                                                                                                                                                                                                                                                                                                                                                                                                                                                                                                                                                                                                                                                                               |                                                                     |                                                                                                                            |                                                                                                                                                                                                                                                                                                                                                                  |                                                        |
|-------------------------------------------------------------------------------------------------------------------------------------------------------------------------------------------------------------------------------------------------------------------------------------------------------------------------------------------------------------------------------------------------------------------------------------------------------------------------------------------------------------------------------------------------------------------------------------------------------------------------------------------------------------------------------------------------------------------------------------------------------------------------------------------------------------------------------|---------------------------------------------------------------------|----------------------------------------------------------------------------------------------------------------------------|------------------------------------------------------------------------------------------------------------------------------------------------------------------------------------------------------------------------------------------------------------------------------------------------------------------------------------------------------------------|--------------------------------------------------------|
|                                                                                                                                                                                                                                                                                                                                                                                                                                                                                                                                                                                                                                                                                                                                                                                                                               |                                                                     |                                                                                                                            |                                                                                                                                                                                                                                                                                                                                                                  | Dave Wentworth, Vivien Dugan, Suxiang Tong, Justin Lee |
| EPI_ISL_1446986                                                                                                                                                                                                                                                                                                                                                                                                                                                                                                                                                                                                                                                                                                                                                                                                               | "MN PHL Division, Minnesota Department of Health"                   | Centers for Disease Control and Prevention Division of Viral Diseases, Pathogen Discovery                                  | Mili Sheth, Sarah Nobles, Jasmine Padilla, Mark Burroughs, Shoshona Le, Katie Dillon, Peter Cook, Clinton R. Paden, Dhvani Batra, Krista Queen, Kristen Knipe, Dakota Howard, Yvette Unoarumhi, Darlene Wagner, Matthew Schmeier, Ben L. Rambo-Martin, Kristine Lacek, Sam Shepard, Alison Laufer Halpin, Dave Wentworth, Vivien Dugan, Suxiang Tong, Justin Lee |                                                        |
| EPI_ISL_1446989                                                                                                                                                                                                                                                                                                                                                                                                                                                                                                                                                                                                                                                                                                                                                                                                               | SD Public Health Laboratory                                         | Centers for Disease Control and Prevention Division of Viral Diseases, Pathogen Discovery                                  | Mili Sheth, Sarah Nobles, Jasmine Padilla, Mark Burroughs, Shoshona Le, Katie Dillon, Peter Cook, Clinton R. Paden, Dhvani Batra, Krista Queen, Kristen Knipe, Dakota Howard, Yvette Unoarumhi, Darlene Wagner, Matthew Schmeier, Ben L. Rambo-Martin, Kristine Lacek, Sam Shepard, Alison Laufer Halpin, Dave Wentworth, Vivien Dugan, Suxiang Tong, Justin Lee |                                                        |
| EPI_ISL_1447002                                                                                                                                                                                                                                                                                                                                                                                                                                                                                                                                                                                                                                                                                                                                                                                                               | AL Dept. of Public Health Bureau of Clinical Laboratories           | Centers for Disease Control and Prevention Division of Viral Diseases, Pathogen Discovery                                  | Mili Sheth, Sarah Nobles, Jasmine Padilla, Mark Burroughs, Shoshona Le, Katie Dillon, Peter Cook, Clinton R. Paden, Dhvani Batra, Krista Queen, Kristen Knipe, Dakota Howard, Yvette Unoarumhi, Darlene Wagner, Matthew Schmeier, Ben L. Rambo-Martin, Kristine Lacek, Sam Shepard, Alison Laufer Halpin, Dave Wentworth, Vivien Dugan, Suxiang Tong, Justin Lee |                                                        |
| EPI_ISL_1447014                                                                                                                                                                                                                                                                                                                                                                                                                                                                                                                                                                                                                                                                                                                                                                                                               | LA Office of Public Health Laboratories                             | Centers for Disease Control and Prevention Division of Viral Diseases, Pathogen Discovery                                  | Mili Sheth, Sarah Nobles, Jasmine Padilla, Mark Burroughs, Shoshona Le, Katie Dillon, Peter Cook, Clinton R. Paden, Dhvani Batra, Krista Queen, Kristen Knipe, Dakota Howard, Yvette Unoarumhi, Darlene Wagner, Matthew Schmeier, Ben L. Rambo-Martin, Kristine Lacek, Sam Shepard, Alison Laufer Halpin, Dave Wentworth, Vivien Dugan, Suxiang Tong, Justin Lee |                                                        |
| EPI_ISL_1447018                                                                                                                                                                                                                                                                                                                                                                                                                                                                                                                                                                                                                                                                                                                                                                                                               | "CDPH, Viral and Rickettsial Disease Laboratory"                    | Centers for Disease Control and Prevention Division of Viral Diseases, Pathogen Discovery                                  | Mili Sheth, Sarah Nobles, Jasmine Padilla, Mark Burroughs, Shoshona Le, Katie Dillon, Peter Cook, Clinton R. Paden, Dhvani Batra, Krista Queen, Kristen Knipe, Dakota Howard, Yvette Unoarumhi, Darlene Wagner, Matthew Schmeier, Ben L. Rambo-Martin, Kristine Lacek, Sam Shepard, Alison Laufer Halpin, Dave Wentworth, Vivien Dugan, Suxiang Tong, Justin Lee |                                                        |
| EPI_ISL_1447021, EPI_ISL_1447024                                                                                                                                                                                                                                                                                                                                                                                                                                                                                                                                                                                                                                                                                                                                                                                              | "PA Department of Health, Bureau of Laboratories"                   | Centers for Disease Control and Prevention Division of Viral Diseases, Pathogen Discovery                                  | Mili Sheth, Sarah Nobles, Jasmine Padilla, Mark Burroughs, Shoshona Le, Katie Dillon, Peter Cook, Clinton R. Paden, Dhvani Batra, Krista Queen, Kristen Knipe, Dakota Howard, Yvette Unoarumhi, Darlene Wagner, Matthew Schmeier, Ben L. Rambo-Martin, Kristine Lacek, Sam Shepard, Alison Laufer Halpin, Dave Wentworth, Vivien Dugan, Suxiang Tong, Justin Lee |                                                        |
| EPI_ISL_1447029                                                                                                                                                                                                                                                                                                                                                                                                                                                                                                                                                                                                                                                                                                                                                                                                               | OR State PHL-Virology/Immunology Section                            | Centers for Disease Control and Prevention Division of Viral Diseases, Pathogen Discovery                                  | Mili Sheth, Sarah Nobles, Jasmine Padilla, Mark Burroughs, Shoshona Le, Katie Dillon, Peter Cook, Clinton R. Paden, Dhvani Batra, Krista Queen, Kristen Knipe, Dakota Howard, Yvette Unoarumhi, Darlene Wagner, Matthew Schmeier, Ben L. Rambo-Martin, Kristine Lacek, Sam Shepard, Alison Laufer Halpin, Dave Wentworth, Vivien Dugan, Suxiang Tong, Justin Lee |                                                        |
| EPI_ISL_1447061                                                                                                                                                                                                                                                                                                                                                                                                                                                                                                                                                                                                                                                                                                                                                                                                               | NYC Department of Health and Mental Hygiene                         | Centers for Disease Control and Prevention Division of Viral Diseases, Pathogen Discovery                                  | Mili Sheth, Sarah Nobles, Jasmine Padilla, Mark Burroughs, Shoshona Le, Katie Dillon, Peter Cook, Clinton R. Paden, Dhvani Batra, Krista Queen, Kristen Knipe, Dakota Howard, Yvette Unoarumhi, Darlene Wagner, Matthew Schmeier, Ben L. Rambo-Martin, Kristine Lacek, Sam Shepard, Alison Laufer Halpin, Dave Wentworth, Vivien Dugan, Suxiang Tong, Justin Lee |                                                        |
| EPI_ISL_1447096, EPI_ISL_1447118                                                                                                                                                                                                                                                                                                                                                                                                                                                                                                                                                                                                                                                                                                                                                                                              | DOHMH Chelsea                                                       | New York City Public Health Laboratory                                                                                     | Jade Wang, et al.                                                                                                                                                                                                                                                                                                                                                |                                                        |
| EPI_ISL_1447119                                                                                                                                                                                                                                                                                                                                                                                                                                                                                                                                                                                                                                                                                                                                                                                                               | OCME Office Of Chief Medical Examiner                               | New York City Public Health Laboratory                                                                                     | Jade Wang, et al.                                                                                                                                                                                                                                                                                                                                                |                                                        |
| EPI_ISL_1447122                                                                                                                                                                                                                                                                                                                                                                                                                                                                                                                                                                                                                                                                                                                                                                                                               | DOHMH Jamaica                                                       | New York City Public Health Laboratory                                                                                     | Jade Wang, et al.                                                                                                                                                                                                                                                                                                                                                |                                                        |
| EPI_ISL_1447123                                                                                                                                                                                                                                                                                                                                                                                                                                                                                                                                                                                                                                                                                                                                                                                                               | DOHMH Chelsea                                                       | New York City Public Health Laboratory                                                                                     | Jade Wang, et al.                                                                                                                                                                                                                                                                                                                                                |                                                        |
| EPI_ISL_1447124, EPI_ISL_1447125                                                                                                                                                                                                                                                                                                                                                                                                                                                                                                                                                                                                                                                                                                                                                                                              | DOHMH Jamaica                                                       | New York City Public Health Laboratory                                                                                     | Jade Wang, et al.                                                                                                                                                                                                                                                                                                                                                |                                                        |
| EPI_ISL_1447129, EPI_ISL_1447130                                                                                                                                                                                                                                                                                                                                                                                                                                                                                                                                                                                                                                                                                                                                                                                              | DOHMH Central Harlem                                                | New York City Public Health Laboratory                                                                                     | Jade Wang, et al.                                                                                                                                                                                                                                                                                                                                                |                                                        |
| EPI_ISL_1447132                                                                                                                                                                                                                                                                                                                                                                                                                                                                                                                                                                                                                                                                                                                                                                                                               | DOHMH Jamaica                                                       | New York City Public Health Laboratory                                                                                     | Jade Wang, et al.                                                                                                                                                                                                                                                                                                                                                |                                                        |
| EPI_ISL_1447135                                                                                                                                                                                                                                                                                                                                                                                                                                                                                                                                                                                                                                                                                                                                                                                                               | DOHMH Fort Greene                                                   | New York City Public Health Laboratory                                                                                     | Jade Wang, et al.                                                                                                                                                                                                                                                                                                                                                |                                                        |
| EPI_ISL_1447138                                                                                                                                                                                                                                                                                                                                                                                                                                                                                                                                                                                                                                                                                                                                                                                                               | OCME Office Of Chief Medical Examiner                               | New York City Public Health Laboratory                                                                                     | Jade Wang, et al.                                                                                                                                                                                                                                                                                                                                                |                                                        |
| EPI_ISL_1447139, EPI_ISL_1447140, EPI_ISL_1447142                                                                                                                                                                                                                                                                                                                                                                                                                                                                                                                                                                                                                                                                                                                                                                             | DOHMH Corona                                                        | New York City Public Health Laboratory                                                                                     | Jade Wang, et al.                                                                                                                                                                                                                                                                                                                                                |                                                        |
| EPI_ISL_1447202                                                                                                                                                                                                                                                                                                                                                                                                                                                                                                                                                                                                                                                                                                                                                                                                               | Laboratorium Diagnostyki COVID-19 IGC PAN                           | 1. National Institute of Public Health - National Institute of Hygiene; 2. Eurofins Genomics Europe Sequencing GmbH        | Wokowicz Tomasz, Zacharczuk Katarzyna, Sadkowska-Todys Magorzata, Gierczyki Rafa, Eurofins Genomics Europe Sequencing Team, ECDC COVID-19 WGS support team                                                                                                                                                                                                       |                                                        |
| EPI_ISL_1447204                                                                                                                                                                                                                                                                                                                                                                                                                                                                                                                                                                                                                                                                                                                                                                                                               | WSSE Laboratorium Mikrobiologii i Parazytologii                     | 1. National Institute of Public Health - National Institute of Hygiene; 2. Eurofins Genomics Europe Sequencing GmbH        | Wokowicz Tomasz, Zacharczuk Katarzyna, Sadkowska-Todys Magorzata, Gierczyki Rafa, Eurofins Genomics Europe Sequencing Team, ECDC COVID-19 WGS support team                                                                                                                                                                                                       |                                                        |
| EPI_ISL_1447247                                                                                                                                                                                                                                                                                                                                                                                                                                                                                                                                                                                                                                                                                                                                                                                                               | Diagnostyka Sp. Z o.o.                                              | 1. National Institute of Public Health - National Institute of Hygiene; 2. Eurofins Genomics Europe Sequencing GmbH        | Wokowicz Tomasz, Zacharczuk Katarzyna, Sadkowska-Todys Magorzata, Gierczyki Rafa, Eurofins Genomics Europe Sequencing Team, ECDC COVID-19 WGS support team                                                                                                                                                                                                       |                                                        |
| EPI_ISL_1447256                                                                                                                                                                                                                                                                                                                                                                                                                                                                                                                                                                                                                                                                                                                                                                                                               | National Institute of Public Health - National Institute of Hygiene | 1. National Institute of Public Health - National Institute of Hygiene; 2. Eurofins Genomics Europe Sequencing GmbH        | Wokowicz Tomasz, Zacharczuk Katarzyna, Sadkowska-Todys Magorzata, Gierczyki Rafa, Eurofins Genomics Europe Sequencing Team, ECDC COVID-19 WGS support team                                                                                                                                                                                                       |                                                        |
| EPI_ISL_1447257                                                                                                                                                                                                                                                                                                                                                                                                                                                                                                                                                                                                                                                                                                                                                                                                               | Odzia Mikrobiologii WSSE Wroclaw                                    | 1. National Institute of Public Health - National Institute of Hygiene; 2. Eurofins Genomics Europe Sequencing GmbH        | Wokowicz Tomasz, Zacharczuk Katarzyna, Sadkowska-Todys Magorzata, Gierczyki Rafa, Eurofins Genomics Europe Sequencing Team, ECDC COVID-19 WGS support team                                                                                                                                                                                                       |                                                        |
| EPI_ISL_1447513, EPI_ISL_1447516, EPI_ISL_1447523, EPI_ISL_1447524, EPI_ISL_1447525, EPI_ISL_1447528, EPI_ISL_1447530, EPI_ISL_1447537, EPI_ISL_1447539, EPI_ISL_1447540, EPI_ISL_1447541, EPI_ISL_1447547, EPI_ISL_1447553, EPI_ISL_1447561, EPI_ISL_1447565, EPI_ISL_1447569, EPI_ISL_1447574, EPI_ISL_1447580, EPI_ISL_1447583, EPI_ISL_1447584, EPI_ISL_1447586, EPI_ISL_1447587, EPI_ISL_1447589, EPI_ISL_1447590, EPI_ISL_1447596, EPI_ISL_1447611, EPI_ISL_1447612, EPI_ISL_1447614, EPI_ISL_1447616, EPI_ISL_1447617, EPI_ISL_1447618, EPI_ISL_1447624, EPI_ISL_1447628, EPI_ISL_1447631, EPI_ISL_1447635, EPI_ISL_1447636, EPI_ISL_1447638, EPI_ISL_1447643, EPI_ISL_1447644, EPI_ISL_1447648, EPI_ISL_1447651, EPI_ISL_1447652, EPI_ISL_1447657, EPI_ISL_1447661, EPI_ISL_1447662, EPI_ISL_1447664, EPI_ISL_1447666 |                                                                     |                                                                                                                            |                                                                                                                                                                                                                                                                                                                                                                  |                                                        |
| see above                                                                                                                                                                                                                                                                                                                                                                                                                                                                                                                                                                                                                                                                                                                                                                                                                     | Yale Clinical Virology Lab                                          | Grubaugh Lab - Yale School of Public Health                                                                                | Joseph Fauver, Mallery Breban, Isabel Ott, Tara Alpert, Mary Petrone, Anderson Brito, Chantal Vogels, Annie Watkins, Chaney Kalinich, Jessica Rothman, Marie L. Landry, Nathan Grubaugh                                                                                                                                                                          |                                                        |
| EPI_ISL_1447671                                                                                                                                                                                                                                                                                                                                                                                                                                                                                                                                                                                                                                                                                                                                                                                                               | Yale Pathology Lab                                                  | Grubaugh Lab - Yale School of Public Health                                                                                | Joseph Fauver, Mallery Breban, Isabel Ott, Tara Alpert, Mary Petrone, Anderson Brito, Chantal Vogels, Annie Watkins, Chaney Kalinich, Jessica Rothman, Jianhui Wang, Chen Liu, Pei Hui, Nathan Grubaugh                                                                                                                                                          |                                                        |
| EPI_ISL_1447673, EPI_ISL_1447674, EPI_ISL_1447675, EPI_ISL_1447676                                                                                                                                                                                                                                                                                                                                                                                                                                                                                                                                                                                                                                                                                                                                                            | Grubaugh Lab - Yale School of Public Health                         | Grubaugh Lab - Yale School of Public Health                                                                                | Joseph Fauver, Mallery Breban, Isabel Ott, Tara Alpert, Mary Petrone, Anderson Brito, Chantal Vogels, Annie Watkins, Chaney Kalinich, Jessica Rothman, Nathan Grubaugh                                                                                                                                                                                           |                                                        |
| EPI_ISL_1447688, EPI_ISL_1447835, EPI_ISL_1447841, EPI_ISL_1447842, EPI_ISL_1447874, EPI_ISL_1447906                                                                                                                                                                                                                                                                                                                                                                                                                                                                                                                                                                                                                                                                                                                          | IZSM                                                                | TIGEM                                                                                                                      | Antonio Grimaldi Patrizia Annunziata Francesco Panariello Biancamaria Pierri Claudia Tiberio Valentina Bouche Chiara Colantuono Maria Concetta Cuomo Denise Di Concilio Lucio Di Filippo Anna Manfredi Marcello Salvi Antonio Limone Luigi Atripaldi Pellegrino Cerino Andrea Ballabio Davide Cacchiarelli                                                       |                                                        |
| EPI_ISL_1447974                                                                                                                                                                                                                                                                                                                                                                                                                                                                                                                                                                                                                                                                                                                                                                                                               | 20210301612                                                         | TIGEM                                                                                                                      | Antonio Grimaldi Patrizia Annunziata Francesco Panariello Biancamaria Pierri Claudia Tiberio Valentina Bouche Chiara Colantuono Maria Concetta Cuomo Denise Di Concilio Lucio Di Filippo Anna Manfredi Marcello Salvi Antonio Limone Luigi Atripaldi Pellegrino Cerino Andrea Ballabio Davide Cacchiarelli                                                       |                                                        |
| EPI_ISL_1448004                                                                                                                                                                                                                                                                                                                                                                                                                                                                                                                                                                                                                                                                                                                                                                                                               | 20210303790                                                         | TIGEM                                                                                                                      | Antonio Grimaldi Patrizia Annunziata Francesco Panariello Biancamaria Pierri Claudia Tiberio Valentina Bouche Chiara Colantuono Maria Concetta Cuomo Denise Di Concilio Lucio Di Filippo Anna Manfredi Marcello Salvi Antonio Limone Luigi Atripaldi Pellegrino Cerino Andrea Ballabio Davide Cacchiarelli                                                       |                                                        |
| EPI_ISL_1448127, EPI_ISL_1448337                                                                                                                                                                                                                                                                                                                                                                                                                                                                                                                                                                                                                                                                                                                                                                                              | UW Virology Lab                                                     | UW Virology Lab                                                                                                            | Pavitra Roychoudhury, Hong Xie, Lasata Shrestha, Shah Mohamed Bakhsh, Michelle Lin, Noah R. Baker, Sean Ellis, Saraswathi Sathees, Meei-Li Huang, Keith R Jerome, Alexander Greninger                                                                                                                                                                            |                                                        |
| EPI_ISL_1448436, EPI_ISL_1448486                                                                                                                                                                                                                                                                                                                                                                                                                                                                                                                                                                                                                                                                                                                                                                                              | CHUGA-IBP-laboratoire de Virologie                                  | IBP-laboratoire de virologie                                                                                               | Sylvie Larrat, Patrice Morand, Pascal Poignard, Raphaël Germi, Julien Lupo, Anne Signori -Schmuck , Anne-Karen Faure, Benjamin Nemoz, Aurélie Truffot, Léa Ponderand, Julien Andréani                                                                                                                                                                            |                                                        |
| EPI_ISL_1448523                                                                                                                                                                                                                                                                                                                                                                                                                                                                                                                                                                                                                                                                                                                                                                                                               | TN Division of Laboratory Services                                  | Genomics and Discovery, Respiratory Viruses Branch, Division of Viral Diseases, Centers for Disease Control and Prevention | Yan Li, Anna Kelleher, Ying Tao, Jing Zhang, Brian Lynch, Krista Queen, Anna Uehara, Peter Cook, Han Jia Justin Ng, Clinton R. Paden, Haibin Wang, Suxiang Tong                                                                                                                                                                                                  |                                                        |
| EPI_ISL_1448676                                                                                                                                                                                                                                                                                                                                                                                                                                                                                                                                                                                                                                                                                                                                                                                                               | University Hospitals of Geneva, Laboratory of Virology              | HUG, Laboratory of Virology and the Health2030 Genome Center                                                               | Samuel Cordey, Ana Rita Goncalves, Laurent Kaiser, Lorenzo Cerutti, Henri Pegeot, Melyssa Elies, Deborah Penet, Keith Harshman, Ioannis Xenarios, Emmanouil Dermitzakis                                                                                                                                                                                          |                                                        |

|                                                                                     |                                                                                       |                                                                                       |                                                                                                                                                                                                                                                                                                                                                                                                                                                 |
|-------------------------------------------------------------------------------------|---------------------------------------------------------------------------------------|---------------------------------------------------------------------------------------|-------------------------------------------------------------------------------------------------------------------------------------------------------------------------------------------------------------------------------------------------------------------------------------------------------------------------------------------------------------------------------------------------------------------------------------------------|
| EPI_ISL_1449037, EPI_ISL_1449114, EPI_ISL_1449890                                   | Lighthouse Lab in Alderley Park                                                       | Wellcome Sanger Institute for the COVID-19 Genomics UK (COG-UK) Consortium            | Jacquelyn Wynn, Mairead Hyland, The Lighthouse Lab in Alderley Park and Alex Alderton, Roberto Amato, Jeffrey Barrett, Sonia Goncalves, Ewan Harrison, David K. Jackson, Ian Johnston, Dominic Kwiatkowski, Cordelia Langford, John Sillitoe on behalf of the Wellcome Sanger Institute COVID-19 Surveillance Team                                                                                                                              |
| EPI_ISL_1450413                                                                     | Lighthouse Lab in Milton Keynes                                                       | Wellcome Sanger Institute for the COVID-19 Genomics UK (COG-UK) Consortium            | The Lighthouse Lab in Milton Keynes and Alex Alderton, Roberto Amato, Jeffrey Barrett, Sonia Goncalves, Ewan Harrison, David K. Jackson, Ian Johnston, Dominic Kwiatkowski, Cordelia Langford, John Sillitoe on behalf of the Wellcome Sanger Institute COVID-19 Surveillance Team                                                                                                                                                              |
| EPI_ISL_1450661, EPI_ISL_1450887                                                    | Randox Laboratories                                                                   | Wellcome Sanger Institute for the COVID-19 Genomics UK (COG-UK) Consortium            | Randox Laboratories and Alex Alderton, Roberto Amato, Jeffrey Barrett, Sonia Goncalves, Ewan Harrison, David K. Jackson, Ian Johnston, Dominic Kwiatkowski, Cordelia Langford, John Sillitoe on behalf of the Wellcome Sanger Institute COVID-19 Surveillance Team                                                                                                                                                                              |
| EPI_ISL_1451303                                                                     | Lighthouse Lab in Glasgow                                                             | Wellcome Sanger Institute for the COVID-19 Genomics UK (COG-UK) Consortium            | Harper VanSteenhouse, Yumi Kasai, David Gray, Carol Clugston, Anna Dominiczak and Alex Alderton, Roberto Amato, Jeffrey Barrett, Sonia Goncalves, Ewan Harrison, David K. Jackson, Ian Johnston, Dominic Kwiatkowski, Cordelia Langford, John Sillitoe on behalf of the Wellcome Sanger Institute COVID-19 Surveillance Team                                                                                                                    |
| EPI_ISL_1451821                                                                     | Lighthouse Lab in Alderley Park                                                       | Wellcome Sanger Institute for the COVID-19 Genomics UK (COG-UK) Consortium            | Jacquelyn Wynn, Mairead Hyland, The Lighthouse Lab in Alderley Park and Alex Alderton, Roberto Amato, Jeffrey Barrett, Sonia Goncalves, Ewan Harrison, David K. Jackson, Ian Johnston, Dominic Kwiatkowski, Cordelia Langford, John Sillitoe on behalf of the Wellcome Sanger Institute COVID-19 Surveillance Team                                                                                                                              |
| EPI_ISL_1451837                                                                     | Lighthouse Lab in Glasgow                                                             | Wellcome Sanger Institute for the COVID-19 Genomics UK (COG-UK) Consortium            | Harper VanSteenhouse, Yumi Kasai, David Gray, Carol Clugston, Anna Dominiczak and Alex Alderton, Roberto Amato, Jeffrey Barrett, Sonia Goncalves, Ewan Harrison, David K. Jackson, Ian Johnston, Dominic Kwiatkowski, Cordelia Langford, John Sillitoe on behalf of the Wellcome Sanger Institute COVID-19 Surveillance Team                                                                                                                    |
| EPI_ISL_1452147                                                                     | Lighthouse Lab in Alderley Park                                                       | Wellcome Sanger Institute for the COVID-19 Genomics UK (COG-UK) Consortium            | Jacquelyn Wynn, Mairead Hyland, The Lighthouse Lab in Alderley Park and Alex Alderton, Roberto Amato, Jeffrey Barrett, Sonia Goncalves, Ewan Harrison, David K. Jackson, Ian Johnston, Dominic Kwiatkowski, Cordelia Langford, John Sillitoe on behalf of the Wellcome Sanger Institute COVID-19 Surveillance Team                                                                                                                              |
| EPI_ISL_1452221                                                                     | Lighthouse Lab in Glasgow                                                             | Wellcome Sanger Institute for the COVID-19 Genomics UK (COG-UK) Consortium            | Harper VanSteenhouse, Yumi Kasai, David Gray, Carol Clugston, Anna Dominiczak and Alex Alderton, Roberto Amato, Jeffrey Barrett, Sonia Goncalves, Ewan Harrison, David K. Jackson, Ian Johnston, Dominic Kwiatkowski, Cordelia Langford, John Sillitoe on behalf of the Wellcome Sanger Institute COVID-19 Surveillance Team                                                                                                                    |
| EPI_ISL_1452321                                                                     | Lighthouse Lab in Milton Keynes                                                       | Wellcome Sanger Institute for the COVID-19 Genomics UK (COG-UK) Consortium            | The Lighthouse Lab in Milton Keynes and Alex Alderton, Roberto Amato, Jeffrey Barrett, Sonia Goncalves, Ewan Harrison, David K. Jackson, Ian Johnston, Dominic Kwiatkowski, Cordelia Langford, John Sillitoe on behalf of the Wellcome Sanger Institute COVID-19 Surveillance Team                                                                                                                                                              |
| EPI_ISL_1452404, EPI_ISL_1452884                                                    | Lighthouse Lab in Glasgow                                                             | Wellcome Sanger Institute for the COVID-19 Genomics UK (COG-UK) Consortium            | Harper VanSteenhouse, Yumi Kasai, David Gray, Carol Clugston, Anna Dominiczak and Alex Alderton, Roberto Amato, Jeffrey Barrett, Sonia Goncalves, Ewan Harrison, David K. Jackson, Ian Johnston, Dominic Kwiatkowski, Cordelia Langford, John Sillitoe on behalf of the Wellcome Sanger Institute COVID-19 Surveillance Team                                                                                                                    |
| EPI_ISL_1453009, EPI_ISL_1453432                                                    | Lighthouse Lab in Alderley Park                                                       | Wellcome Sanger Institute for the COVID-19 Genomics UK (COG-UK) Consortium            | Jacquelyn Wynn, Mairead Hyland, The Lighthouse Lab in Alderley Park and Alex Alderton, Roberto Amato, Jeffrey Barrett, Sonia Goncalves, Ewan Harrison, David K. Jackson, Ian Johnston, Dominic Kwiatkowski, Cordelia Langford, John Sillitoe on behalf of the Wellcome Sanger Institute COVID-19 Surveillance Team                                                                                                                              |
| EPI_ISL_1453850                                                                     | Lighthouse Lab in Glasgow                                                             | Wellcome Sanger Institute for the COVID-19 Genomics UK (COG-UK) Consortium            | Harper VanSteenhouse, Yumi Kasai, David Gray, Carol Clugston, Anna Dominiczak and Alex Alderton, Roberto Amato, Jeffrey Barrett, Sonia Goncalves, Ewan Harrison, David K. Jackson, Ian Johnston, Dominic Kwiatkowski, Cordelia Langford, John Sillitoe on behalf of the Wellcome Sanger Institute COVID-19 Surveillance Team                                                                                                                    |
| EPI_ISL_1454417, EPI_ISL_1454647, EPI_ISL_1454885, EPI_ISL_1455168                  | Lighthouse Lab in Alderley Park                                                       | Wellcome Sanger Institute for the COVID-19 Genomics UK (COG-UK) Consortium            | Jacquelyn Wynn, Mairead Hyland, The Lighthouse Lab in Alderley Park and Alex Alderton, Roberto Amato, Jeffrey Barrett, Sonia Goncalves, Ewan Harrison, David K. Jackson, Ian Johnston, Dominic Kwiatkowski, Cordelia Langford, John Sillitoe on behalf of the Wellcome Sanger Institute COVID-19 Surveillance Team                                                                                                                              |
| EPI_ISL_1455277                                                                     | Lighthouse Lab in Milton Keynes                                                       | Wellcome Sanger Institute for the COVID-19 Genomics UK (COG-UK) Consortium            | The Lighthouse Lab in Milton Keynes and Alex Alderton, Roberto Amato, Jeffrey Barrett, Sonia Goncalves, Ewan Harrison, David K. Jackson, Ian Johnston, Dominic Kwiatkowski, Cordelia Langford, John Sillitoe on behalf of the Wellcome Sanger Institute COVID-19 Surveillance Team                                                                                                                                                              |
| EPI_ISL_1455671                                                                     | "Stefan S. Nicolau" Institute of Virology                                             | "Stefan S. Nicolau" Institute of Virology                                             | Anca Botezatu, Iulia Virginia Iancu, Coralia Bleotu, Mihaela Economescu, Laura Necula, Denisa Dragu, Lilia Matei, Ioana Pitica, Marinela Bostan, Mirela Mihaila, Laura Grecu, Camelia Sultana, Simona Ruta, Ana Iulia Neagu, Adriana Plesa, Saviana Nedeianu, Alina Nastasie, Cristina Mambet, Gabriela Anton, Carmen Cristina Diaconu                                                                                                          |
| EPI_ISL_1456863                                                                     | Dutch COVID-19 response team                                                          | National Institute for Public Health and the Environment (RIVM)                       | Adam Meijer, Harry Vennema, Dirk Eggink, Jeroen Cremer, Sharon van den Brink, Bas van der Veer, AnneMarie van den Brandt, Lisa Wijsman, Kim Freriks, Ryanne Jaarsma, Eunice Then, Jolienke Hardeman, Lynn Aarts, Sanne Bos, Melissa van Tuil, Robert Kohl, Linda van de Nes, Sjoerd Kuiling, James Groot, Florian Zwagemaker, Dennis Schmitz, Annelies Kroneman, Karim Hajji, Chantal Reusken, on behalf of the national COVID-19 response team |
| EPI_ISL_1457126                                                                     | "Stefan S. Nicolau" Institute of Virology                                             | "Stefan S. Nicolau" Institute of Virology                                             | Anca Botezatu, Iulia Virginia Iancu, Coralia Bleotu, Mihaela Economescu, Laura Necula, Denisa Dragu, Lilia Matei, Ioana Pitica, Marinela Bostan, Mirela Mihaila, Laura Grecu, Camelia Sultana, Simona Ruta, Ana Iulia Neagu, Adriana Plesa, Saviana Nedeianu, Alina Nastasie, Cristina Mambet, Gabriela Anton, Carmen Cristina Diaconu                                                                                                          |
| EPI_ISL_1457457                                                                     | Dutch COVID-19 response team                                                          | National Institute for Public Health and the Environment (RIVM)                       | Adam Meijer, Harry Vennema, Dirk Eggink, Jeroen Cremer, Sharon van den Brink, Bas van der Veer, AnneMarie van den Brandt, Lisa Wijsman, Kim Freriks, Ryanne Jaarsma, Eunice Then, Jolienke Hardeman, Lynn Aarts, Sanne Bos, Melissa van Tuil, Robert Kohl, Linda van de Nes, Sjoerd Kuiling, James Groot, Florian Zwagemaker, Dennis Schmitz, Annelies Kroneman, Karim Hajji, Chantal Reusken, on behalf of the national COVID-19 response team |
| EPI_ISL_1457759                                                                     | EPSILAB TALON VEZERONCE CURTIN                                                        | CNR Virus des Infections Respiratoires - France SUD                                   | Antonin Bal, Gregory Destras, Gwendolynne Burfin, Hadrien Regue, Quentin Semanas, Martine Valette, Bruno Lina, Laurence Josset                                                                                                                                                                                                                                                                                                                  |
| EPI_ISL_1457773                                                                     | Dr. Carol Davila Central Military Emergency University Hospital                       | "Stefan S. Nicolau" Institute of Virology                                             | Anca Botezatu, Iulia Virginia Iancu, Coralia Bleotu, Mihaela Economescu, Laura Necula, Denisa Dragu, Lilia Matei, Ioana Pitica, Marinela Bostan, Mirela Mihaila, Laura Grecu, Camelia Sultana, Simona Ruta, Ana Iulia Neagu, Adriana Plesa, Saviana Nedeianu, Alina Nastasie, Cristina Mambet, Gabriela Anton, Codruta-Georgiana Carp, Carmen Cristina Diaconu                                                                                  |
| EPI_ISL_1457777                                                                     | AZ Klina                                                                              | AZ Klina                                                                              | Carl Vael - Lynsey Berckmans                                                                                                                                                                                                                                                                                                                                                                                                                    |
| EPI_ISL_1461019, EPI_ISL_1461029                                                    | CNR Virus des Infections Respiratoires - France SUD                                   | CNR Virus des Infections Respiratoires - France SUD                                   | Antonin Bal, Gregory Destras, Gwendolynne Burfin, Hadrien Regue, Quentin Semanas, Martine Valette, Bruno Lina, Laurence Josset                                                                                                                                                                                                                                                                                                                  |
| EPI_ISL_1461077                                                                     | MEDIPOLE CHALLES LES EAUX                                                             | CNR Virus des Infections Respiratoires - France SUD                                   | Antonin Bal, Gregory Destras, Gwendolynne Burfin, Hadrien Regue, Quentin Semanas, Martine Valette, Bruno Lina, Laurence Josset                                                                                                                                                                                                                                                                                                                  |
| EPI_ISL_1461107                                                                     | BIOMNIS LYON                                                                          | CNR Virus des Infections Respiratoires - France SUD                                   | Antonin Bal, Gregory Destras, Gwendolynne Burfin, Hadrien Regue, Quentin Semanas, Martine Valette, Bruno Lina, Laurence Josset                                                                                                                                                                                                                                                                                                                  |
| EPI_ISL_1461110                                                                     | LAM BAYARD-BIOPYRENEES                                                                | CNR Virus des Infections Respiratoires - France SUD                                   | Antonin Bal, Gregory Destras, Gwendolynne Burfin, Hadrien Regue, Quentin Semanas, Martine Valette, Bruno Lina, Laurence Josset                                                                                                                                                                                                                                                                                                                  |
| EPI_ISL_1461127                                                                     | BIOSELLAL                                                                             | CNR Virus des Infections Respiratoires - France SUD                                   | Antonin Bal, Gregory Destras, Gwendolynne Burfin, Hadrien Regue, Quentin Semanas, Martine Valette, Bruno Lina, Laurence Josset                                                                                                                                                                                                                                                                                                                  |
| EPI_ISL_1461190                                                                     | CHU ST ETIENNE HOPITAL NORD                                                           | CNR Virus des Infections Respiratoires - France SUD                                   | Antonin Bal, Gregory Destras, Gwendolynne Burfin, Hadrien Regue, Quentin Semanas, Martine Valette, Bruno Lina, Laurence Josset                                                                                                                                                                                                                                                                                                                  |
| EPI_ISL_1461239                                                                     | CNR Virus des Infections Respiratoires - France SUD                                   | CNR Virus des Infections Respiratoires - France SUD                                   | Antonin Bal, Gregory Destras, Gwendolynne Burfin, Hadrien Regue, Quentin Semanas, Martine Valette, Bruno Lina, Laurence Josset                                                                                                                                                                                                                                                                                                                  |
| EPI_ISL_1461262                                                                     | Laboratorio Aziendale di Microbiologia e Virologia, Azienda Sanitaria dell'Alto Adige | Laboratorio Aziendale di Microbiologia e Virologia, Azienda Sanitaria dell'Alto Adige | Irene Bianconi, Bartolomeo Milioli Rodriguez, Elisabetta Giacobazzi, Elisa Masi, Stefanie Wieser, Anne Picard, Claudia Volpato, Chiara Cantaloni, Elisabetta Pagani                                                                                                                                                                                                                                                                             |
| EPI_ISL_1461297                                                                     | ALBANY MEDICAL CENTER                                                                 | Wadsworth Center, New York State Department of Health                                 | Kirsten St. George, Daryl M. Lamson, Alexis Russell, Matthew Shudt, Melissa A Leisner, Jonathan Plitnick, Catharine Prussing, Navjot Singh, John Kelly, Erasmus Schneider, Erica Lasek-Nesselquist                                                                                                                                                                                                                                              |
| EPI_ISL_1461302                                                                     | URMC LABS                                                                             | Wadsworth Center, New York State Department of Health                                 | Kirsten St. George, Daryl M. Lamson, Alexis Russell, Matthew Shudt, Melissa A Leisner, Jonathan Plitnick, Catharine Prussing, Navjot Singh, John Kelly, Erasmus Schneider, Erica Lasek-Nesselquist                                                                                                                                                                                                                                              |
| EPI_ISL_1461328, EPI_ISL_1461329, EPI_ISL_1461331, EPI_ISL_1461345, EPI_ISL_1461351 | NYC Pandemic Response Lab                                                             | Wadsworth Center, New York State Department of Health                                 | Kirsten St. George, Daryl M. Lamson, Alexis Russell, Matthew Shudt, Melissa A Leisner, Jonathan Plitnick, Catharine Prussing, Navjot Singh, John Kelly, Erasmus Schneider, Erica Lasek-Nesselquist                                                                                                                                                                                                                                              |

|                                                                                     |                                                                                                                                                                                |                                                                                                                                                |                                                                                                                                                                                                                                                                                                                              |
|-------------------------------------------------------------------------------------|--------------------------------------------------------------------------------------------------------------------------------------------------------------------------------|------------------------------------------------------------------------------------------------------------------------------------------------|------------------------------------------------------------------------------------------------------------------------------------------------------------------------------------------------------------------------------------------------------------------------------------------------------------------------------|
| EPI_ISL_1461419                                                                     | Michigan Department of Health and Human Services, Bureau of Laboratories                                                                                                       | Michigan Department of Health and Human Services, Bureau of Laboratories                                                                       | Blankenship HM, Riner D, Soehnlén MK                                                                                                                                                                                                                                                                                         |
| EPI_ISL_1462519                                                                     | URMC LABS                                                                                                                                                                      | Wadsworth Center, New York State Department of Health                                                                                          | Kirsten St. George, Daryl M. Lamson, Alexis Russell, Matthew Shudt, Melissa A Leisner, Jonathan Plitnick, Catharine Prussing, Navjot Singh, John Kelly, Erasmus Schneider, Erica Lasek-Nesselquist                                                                                                                           |
| EPI_ISL_1462537                                                                     | SUNY UPSTATE MEDICAL UNIVERSITY                                                                                                                                                | Wadsworth Center, New York State Department of Health                                                                                          | Kirsten St. George, Daryl M. Lamson, Alexis Russell, Matthew Shudt, Melissa A Leisner, Jonathan Plitnick, Catharine Prussing, Navjot Singh, John Kelly, Erasmus Schneider, Erica Lasek-Nesselquist                                                                                                                           |
| EPI_ISL_1462556, EPI_ISL_1462615                                                    | NORTHWELL HEALTH LABORATORIES                                                                                                                                                  | Wadsworth Center, New York State Department of Health                                                                                          | Kirsten St. George, Daryl M. Lamson, Alexis Russell, Matthew Shudt, Melissa A Leisner, Jonathan Plitnick, Catharine Prussing, Navjot Singh, John Kelly, Erasmus Schneider, Erica Lasek-Nesselquist                                                                                                                           |
| EPI_ISL_1463505, EPI_ISL_1463513, EPI_ISL_1463537                                   | Labo Analyses Med                                                                                                                                                              | National Reference Center for Viruses of Respiratory Infections, Institut Pasteur, Paris                                                       | Marion Barbet, Sylvie Behillil, Frédéric Lemoine, Corinne Maufrais, Christophe Malabat, Méline Bizard, Angela Brisebarre, Camille Capel, Louise Lefrançois, Etienne Simon-Lorière, Vincent Enouf, Maud Vanpeene, Sylvie van der Werf, Nabil Gastli                                                                           |
| EPI_ISL_1464699, EPI_ISL_1464700, EPI_ISL_1464977, EPI_ISL_1465109, EPI_ISL_1465369 | Sonora Quest Laboratories                                                                                                                                                      | TGen North                                                                                                                                     | "Jolene Bowers, Heather Centner, Chris French, Hayley Yaglom, Ashlyn Pfeiffer, Darrin Lemmer, Dave Engelthaler, The Arizona COVID Genomics Union (ACGU)"                                                                                                                                                                     |
| EPI_ISL_1465440                                                                     | Institute of Molecular and Translational Medicine / Laboratory of Experimental Medicine, Faculty of Medicine and Dentistry, Palacky University and University Hospital Olomouc | Institute of Molecular and Translational Medicine / Laboratory of Experimental Medicine, Faculty of Medicine and Dentistry, Palacky University | Rastislav Slavkovský, Hana Jaworek, Vladimíra Koudeláková, Barbora Blumová, Tomáš Pošpišil, Marián Hajdúch                                                                                                                                                                                                                   |
| EPI_ISL_1465516                                                                     | Labo Analyses Med                                                                                                                                                              | National Reference Center for Viruses of Respiratory Infections, Institut Pasteur, Paris                                                       | Marion Barbet, Sylvie Behillil, Frédéric Lemoine, Corinne Maufrais, Christophe Malabat, Méline Bizard, Angela Brisebarre, Camille Capel, Louise Lefrançois, Etienne Simon-Lorière, Vincent Enouf, Maud Vanpeene, Sylvie van der Werf, Ophélie Said-Delattre                                                                  |
| EPI_ISL_1465548, EPI_ISL_1465555, EPI_ISL_1465565, EPI_ISL_1465602                  | Labo Analyses Med                                                                                                                                                              | National Reference Center for Viruses of Respiratory Infections, Institut Pasteur, Paris                                                       | Marion Barbet, Sylvie Behillil, Frédéric Lemoine, Corinne Maufrais, Christophe Malabat, Méline Bizard, Angela Brisebarre, Camille Capel, Louise Lefrançois, Etienne Simon-Lorière, Vincent Enouf, Maud Vanpeene, Sylvie van der Werf, Jean-François Comes                                                                    |
| EPI_ISL_1465615                                                                     | ALBANY MEDICAL CENTER                                                                                                                                                          | Wadsworth Center, New York State Department of Health                                                                                          | Kirsten St. George, Daryl M. Lamson, Alexis Russell, Matthew Shudt, Melissa A Leisner, Jonathan Plitnick, Catharine Prussing, Navjot Singh, John Kelly, Erasmus Schneider, Erica Lasek-Nesselquist                                                                                                                           |
| EPI_ISL_1465632                                                                     | URMC LABS                                                                                                                                                                      | Wadsworth Center, New York State Department of Health                                                                                          | Kirsten St. George, Daryl M. Lamson, Alexis Russell, Matthew Shudt, Melissa A Leisner, Jonathan Plitnick, Catharine Prussing, Navjot Singh, John Kelly, Erasmus Schneider, Erica Lasek-Nesselquist                                                                                                                           |
| EPI_ISL_1465637                                                                     | WESTCHESTER MEDICAL CENTER                                                                                                                                                     | Wadsworth Center, New York State Department of Health                                                                                          | Kirsten St. George, Daryl M. Lamson, Alexis Russell, Matthew Shudt, Melissa A Leisner, Jonathan Plitnick, Catharine Prussing, Navjot Singh, John Kelly, Erasmus Schneider, Erica Lasek-Nesselquist                                                                                                                           |
| EPI_ISL_1465639                                                                     | ALBANY MEDICAL CENTER                                                                                                                                                          | Wadsworth Center, New York State Department of Health                                                                                          | Kirsten St. George, Daryl M. Lamson, Alexis Russell, Matthew Shudt, Melissa A Leisner, Jonathan Plitnick, Catharine Prussing, Navjot Singh, John Kelly, Erasmus Schneider, Erica Lasek-Nesselquist                                                                                                                           |
| EPI_ISL_1465662, EPI_ISL_1465663                                                    | URMC LABS                                                                                                                                                                      | Wadsworth Center, New York State Department of Health                                                                                          | Kirsten St. George, Daryl M. Lamson, Alexis Russell, Matthew Shudt, Melissa A Leisner, Jonathan Plitnick, Catharine Prussing, Navjot Singh, John Kelly, Erasmus Schneider, Erica Lasek-Nesselquist                                                                                                                           |
| EPI_ISL_1465679                                                                     | NORTHWELL HEALTH LABORATORIES                                                                                                                                                  | Wadsworth Center, New York State Department of Health                                                                                          | Kirsten St. George, Daryl M. Lamson, Alexis Russell, Matthew Shudt, Melissa A Leisner, Jonathan Plitnick, Catharine Prussing, Navjot Singh, John Kelly, Erasmus Schneider, Erica Lasek-Nesselquist                                                                                                                           |
| EPI_ISL_1465683                                                                     | Kansas Health and Environmental Lab                                                                                                                                            | Kansas Health and Environmental Lab                                                                                                            | Mike Grose, Jonathan Barnell, Ben Olsen, and Phil Adam                                                                                                                                                                                                                                                                       |
| EPI_ISL_1465695                                                                     | Columbia University Irving Medical Center                                                                                                                                      | Wadsworth Center, New York State Department of Health                                                                                          | Kirsten St. George, Daryl M. Lamson, Alexis Russell, Matthew Shudt, Melissa A Leisner, Jonathan Plitnick, Catharine Prussing, Navjot Singh, John Kelly, Erasmus Schneider, Erica Lasek-Nesselquist                                                                                                                           |
| EPI_ISL_1465704                                                                     | MONTEFIORE MEDICAL CENTER LABORATORIES                                                                                                                                         | Wadsworth Center, New York State Department of Health                                                                                          | Kirsten St. George, Daryl M. Lamson, Alexis Russell, Matthew Shudt, Melissa A Leisner, Jonathan Plitnick, Catharine Prussing, Navjot Singh, John Kelly, Erasmus Schneider, Erica Lasek-Nesselquist                                                                                                                           |
| EPI_ISL_1465754                                                                     | URMC LABS                                                                                                                                                                      | Wadsworth Center, New York State Department of Health                                                                                          | Kirsten St. George, Daryl M. Lamson, Alexis Russell, Matthew Shudt, Melissa A Leisner, Jonathan Plitnick, Catharine Prussing, Navjot Singh, John Kelly, Erasmus Schneider, Erica Lasek-Nesselquist                                                                                                                           |
| EPI_ISL_1465764                                                                     | NORTHWELL HEALTH LABORATORIES                                                                                                                                                  | Wadsworth Center, New York State Department of Health                                                                                          | Kirsten St. George, Daryl M. Lamson, Alexis Russell, Matthew Shudt, Melissa A Leisner, Jonathan Plitnick, Catharine Prussing, Navjot Singh, John Kelly, Erasmus Schneider, Erica Lasek-Nesselquist                                                                                                                           |
| EPI_ISL_1465794                                                                     | MONTEFIORE MEDICAL CENTER LABORATORIES                                                                                                                                         | Wadsworth Center, New York State Department of Health                                                                                          | Kirsten St. George, Daryl M. Lamson, Alexis Russell, Matthew Shudt, Melissa A Leisner, Jonathan Plitnick, Catharine Prussing, Navjot Singh, John Kelly, Erasmus Schneider, Erica Lasek-Nesselquist                                                                                                                           |
| EPI_ISL_1465822, EPI_ISL_1465826                                                    | NYC Pandemic Response Lab                                                                                                                                                      | Wadsworth Center, New York State Department of Health                                                                                          | Kirsten St. George, Daryl M. Lamson, Alexis Russell, Matthew Shudt, Melissa A Leisner, Jonathan Plitnick, Catharine Prussing, Navjot Singh, John Kelly, Erasmus Schneider, Erica Lasek-Nesselquist                                                                                                                           |
| EPI_ISL_1465841                                                                     | STONY BROOK UNIVERSITY HOSPITAL                                                                                                                                                | Wadsworth Center, New York State Department of Health                                                                                          | Kirsten St. George, Daryl M. Lamson, Alexis Russell, Matthew Shudt, Melissa A Leisner, Jonathan Plitnick, Catharine Prussing, Navjot Singh, John Kelly, Erasmus Schneider, Erica Lasek-Nesselquist                                                                                                                           |
| EPI_ISL_1465857                                                                     | ITHACA COLLEGE LABORATORY HAMMOND HEALTH CENTER                                                                                                                                | Wadsworth Center, New York State Department of Health                                                                                          | Kirsten St. George, Daryl M. Lamson, Alexis Russell, Matthew Shudt, Melissa A Leisner, Jonathan Plitnick, Catharine Prussing, Navjot Singh, John Kelly, Erasmus Schneider, Erica Lasek-Nesselquist                                                                                                                           |
| EPI_ISL_1465894                                                                     | PHV-FSS                                                                                                                                                                        | PHV-FSS                                                                                                                                        | Son Nguyen                                                                                                                                                                                                                                                                                                                   |
| EPI_ISL_1465952                                                                     | Lighthouse Lab in Cambridge                                                                                                                                                    | Wellcome Sanger Institute for the COVID-19 Genomics UK (COG-UK) Consortium                                                                     | Rob Howes, The Lighthouse Lab in Cambridge and Alex Alderton, Roberto Amato, Jeffrey Barrett, Sonia Goncalves, Ewan Harrison, David K. Jackson, Ian Johnston, Dominic Kwiatkowski, Cordelia Langford, John Sillitoe on behalf of the Wellcome Sanger Institute COVID-19 Surveillance Team                                    |
| EPI_ISL_1466154                                                                     | Lighthouse Lab in Glasgow                                                                                                                                                      | Wellcome Sanger Institute for the COVID-19 Genomics UK (COG-UK) Consortium                                                                     | Harper VanSteenhouse, Yumi Kasai, David Gray, Carol Clugston, Anna Dominiczak and Alex Alderton, Roberto Amato, Jeffrey Barrett, Sonia Goncalves, Ewan Harrison, David K. Jackson, Ian Johnston, Dominic Kwiatkowski, Cordelia Langford, John Sillitoe on behalf of the Wellcome Sanger Institute COVID-19 Surveillance Team |
| EPI_ISL_1466345                                                                     | Lighthouse Lab in Alderley Park                                                                                                                                                | Wellcome Sanger Institute for the COVID-19 Genomics UK (COG-UK) Consortium                                                                     | Jacquelyn Wynn, Mairead Hyland, The Lighthouse Lab in Alderley Park and Alex Alderton, Roberto Amato, Jeffrey Barrett, Sonia Goncalves, Ewan Harrison, David K. Jackson, Ian Johnston, Dominic Kwiatkowski, Cordelia Langford, John Sillitoe on behalf of the Wellcome Sanger Institute COVID-19 Surveillance Team           |
| EPI_ISL_1467044                                                                     | Randox Laboratories                                                                                                                                                            | Wellcome Sanger Institute for the COVID-19 Genomics UK (COG-UK) Consortium                                                                     | Randox Laboratories and Alex Alderton, Roberto Amato, Jeffrey Barrett, Sonia Goncalves, Ewan Harrison, David K. Jackson, Ian Johnston, Dominic Kwiatkowski, Cordelia Langford, John Sillitoe on behalf of the Wellcome Sanger Institute COVID-19 Surveillance Team                                                           |
| EPI_ISL_1467213                                                                     | Lighthouse Lab in Alderley Park                                                                                                                                                | Wellcome Sanger Institute for the COVID-19 Genomics UK (COG-UK) Consortium                                                                     | Jacquelyn Wynn, Mairead Hyland, The Lighthouse Lab in Alderley Park and Alex Alderton, Roberto Amato, Jeffrey Barrett, Sonia Goncalves, Ewan Harrison, David K. Jackson, Ian Johnston, Dominic Kwiatkowski, Cordelia Langford, John Sillitoe on behalf of the Wellcome Sanger Institute COVID-19 Surveillance Team           |
| EPI_ISL_1467319, EPI_ISL_1467337                                                    | Randox Laboratories                                                                                                                                                            | Wellcome Sanger Institute for the COVID-19 Genomics UK (COG-UK) Consortium                                                                     | Randox Laboratories and Alex Alderton, Roberto Amato, Jeffrey Barrett, Sonia Goncalves, Ewan Harrison, David K. Jackson, Ian Johnston, Dominic Kwiatkowski, Cordelia Langford, John Sillitoe on behalf of the Wellcome Sanger Institute COVID-19 Surveillance Team                                                           |
| EPI_ISL_1467577                                                                     | Lighthouse Lab in Milton Keynes                                                                                                                                                | Wellcome Sanger Institute for the COVID-19 Genomics UK (COG-UK) Consortium                                                                     | The Lighthouse Lab in Milton Keynes and Alex Alderton, Roberto Amato, Jeffrey Barrett, Sonia Goncalves, Ewan Harrison, David K. Jackson, Ian Johnston, Dominic Kwiatkowski, Cordelia Langford, John Sillitoe on behalf of the Wellcome Sanger Institute COVID-19 Surveillance Team                                           |
| EPI_ISL_1467683, EPI_ISL_1467802                                                    | Lighthouse Lab in Cambridge                                                                                                                                                    | Wellcome Sanger Institute for the COVID-19 Genomics UK (COG-UK) Consortium                                                                     | Rob Howes, The Lighthouse Lab in Cambridge and Alex Alderton, Roberto Amato, Jeffrey Barrett, Sonia Goncalves, Ewan Harrison, David K. Jackson, Ian Johnston, Dominic Kwiatkowski, Cordelia Langford, John Sillitoe on behalf of the Wellcome Sanger Institute COVID-19 Surveillance Team                                    |
| EPI_ISL_1468049                                                                     | Lighthouse Lab in Milton Keynes                                                                                                                                                | Wellcome Sanger Institute for the COVID-19 Genomics UK (COG-UK) Consortium                                                                     | The Lighthouse Lab in Milton Keynes and Alex Alderton, Roberto Amato, Jeffrey Barrett, Sonia Goncalves, Ewan Harrison, David K. Jackson, Ian Johnston, Dominic Kwiatkowski, Cordelia Langford, John Sillitoe on behalf of the Wellcome Sanger Institute COVID-19 Surveillance Team                                           |



|                                                                                                                                                                                                                                                                                                                                                                                                                                                                                                                                                                                                                                                                                                                                                                                                                                                                                                                                                                                                                                                                                                                                                                                                                                                                                                                                                                                                                                                                                                                                                                                                                                                                                                                                                                                                                                                                                                                                                                                                                                                                                                                                         |                                                                                          |                                                                                           |                                                                                                                                                                                                                                                                                                                                                                                                                                                                                                                                                                                                                                                                                                                       |
|-----------------------------------------------------------------------------------------------------------------------------------------------------------------------------------------------------------------------------------------------------------------------------------------------------------------------------------------------------------------------------------------------------------------------------------------------------------------------------------------------------------------------------------------------------------------------------------------------------------------------------------------------------------------------------------------------------------------------------------------------------------------------------------------------------------------------------------------------------------------------------------------------------------------------------------------------------------------------------------------------------------------------------------------------------------------------------------------------------------------------------------------------------------------------------------------------------------------------------------------------------------------------------------------------------------------------------------------------------------------------------------------------------------------------------------------------------------------------------------------------------------------------------------------------------------------------------------------------------------------------------------------------------------------------------------------------------------------------------------------------------------------------------------------------------------------------------------------------------------------------------------------------------------------------------------------------------------------------------------------------------------------------------------------------------------------------------------------------------------------------------------------|------------------------------------------------------------------------------------------|-------------------------------------------------------------------------------------------|-----------------------------------------------------------------------------------------------------------------------------------------------------------------------------------------------------------------------------------------------------------------------------------------------------------------------------------------------------------------------------------------------------------------------------------------------------------------------------------------------------------------------------------------------------------------------------------------------------------------------------------------------------------------------------------------------------------------------|
| EPI_ISL_1468624                                                                                                                                                                                                                                                                                                                                                                                                                                                                                                                                                                                                                                                                                                                                                                                                                                                                                                                                                                                                                                                                                                                                                                                                                                                                                                                                                                                                                                                                                                                                                                                                                                                                                                                                                                                                                                                                                                                                                                                                                                                                                                                         | Johns Hopkins Hospital Department of Pathology                                           | Johns Hopkins Hospital Department of Pathology                                            | C. Paul Morris, Chun Huai Luo, Adannaya Amadi, Matthew Schwartz, Heba H. Mostafa                                                                                                                                                                                                                                                                                                                                                                                                                                                                                                                                                                                                                                      |
| EPI_ISL_1468888                                                                                                                                                                                                                                                                                                                                                                                                                                                                                                                                                                                                                                                                                                                                                                                                                                                                                                                                                                                                                                                                                                                                                                                                                                                                                                                                                                                                                                                                                                                                                                                                                                                                                                                                                                                                                                                                                                                                                                                                                                                                                                                         | Scripps Medical Laboratory                                                               | Andersen lab at Scripps Research                                                          | SEARCH Alliance San Diego with Michael Quigley, Ellen Stefanski, Ian Mchardy                                                                                                                                                                                                                                                                                                                                                                                                                                                                                                                                                                                                                                          |
| EPI_ISL_1469876                                                                                                                                                                                                                                                                                                                                                                                                                                                                                                                                                                                                                                                                                                                                                                                                                                                                                                                                                                                                                                                                                                                                                                                                                                                                                                                                                                                                                                                                                                                                                                                                                                                                                                                                                                                                                                                                                                                                                                                                                                                                                                                         | UCSC Genomics Institute                                                                  | UCSC Genomics Institute                                                                   | Mark Akeson, Ikenna Anigbogu, Eric Beraut, Isabel Bjork, Molly Cassatt-Johnstone, Terren Chang, Russell Corbett-Detig, Namrita Dhillon, Maximilian Haeussler, David Haussler, Angie Hinrichs, Miten Jain, Joshua Kapp, A. Marm Kilpatrick, Jakob McBroom, Hugh Olsen, Jeremy Sanford, Beth Shapiro, Michael Stone, Bryan Thornlow, Yatish Turakhia                                                                                                                                                                                                                                                                                                                                                                    |
| EPI_ISL_1469953                                                                                                                                                                                                                                                                                                                                                                                                                                                                                                                                                                                                                                                                                                                                                                                                                                                                                                                                                                                                                                                                                                                                                                                                                                                                                                                                                                                                                                                                                                                                                                                                                                                                                                                                                                                                                                                                                                                                                                                                                                                                                                                         | University of Bari Biomedical Sciences and Human Oncology                                | University of Bari Biomedical Sciences and Human Oncology                                 | Chironna M., Sallusto A., Loconsole D., Accogli M.                                                                                                                                                                                                                                                                                                                                                                                                                                                                                                                                                                                                                                                                    |
| EPI_ISL_1469977                                                                                                                                                                                                                                                                                                                                                                                                                                                                                                                                                                                                                                                                                                                                                                                                                                                                                                                                                                                                                                                                                                                                                                                                                                                                                                                                                                                                                                                                                                                                                                                                                                                                                                                                                                                                                                                                                                                                                                                                                                                                                                                         | Child Health Research Foundation                                                         | Child Health Research Foundation                                                          | CHRF Bangladesh Genomics Team                                                                                                                                                                                                                                                                                                                                                                                                                                                                                                                                                                                                                                                                                         |
| EPI_ISL_1470379, EPI_ISL_1470402, EPI_ISL_1470403                                                                                                                                                                                                                                                                                                                                                                                                                                                                                                                                                                                                                                                                                                                                                                                                                                                                                                                                                                                                                                                                                                                                                                                                                                                                                                                                                                                                                                                                                                                                                                                                                                                                                                                                                                                                                                                                                                                                                                                                                                                                                       | Kentucky State Public Health Lab                                                         | Kentucky State Public Health Lab                                                          | Stephanie Lunn, Karim George, Joshua Tobias, William Grooms, Vaneet Arora, Matthew Johnson, Rachel Zinner, Rhonda Lucas                                                                                                                                                                                                                                                                                                                                                                                                                                                                                                                                                                                               |
| EPI_ISL_1470416, EPI_ISL_1470425, EPI_ISL_1470544                                                                                                                                                                                                                                                                                                                                                                                                                                                                                                                                                                                                                                                                                                                                                                                                                                                                                                                                                                                                                                                                                                                                                                                                                                                                                                                                                                                                                                                                                                                                                                                                                                                                                                                                                                                                                                                                                                                                                                                                                                                                                       | Genetica Molecular and Subdepartamento de Virologia ISP Chile                            | Instituto de Salud Publica de Chile                                                       | Javier Tognarelli, Karen Orostica, Barbara Parra, Loredana Arata, Jaime Lagos, Gisselle Barra, Patricia Bustos, Rodrigo Fasce, Andres Castillo, Jorge Fernandez                                                                                                                                                                                                                                                                                                                                                                                                                                                                                                                                                       |
| EPI_ISL_1470565, EPI_ISL_1470566, EPI_ISL_1470568, EPI_ISL_1470572, EPI_ISL_1470573, EPI_ISL_1470577, EPI_ISL_1470584, EPI_ISL_1470586, EPI_ISL_1470589, EPI_ISL_1470593, EPI_ISL_1470594, EPI_ISL_1470595, EPI_ISL_1470596, EPI_ISL_1470598, EPI_ISL_1470601, EPI_ISL_1470606, EPI_ISL_1470609, EPI_ISL_1470611, EPI_ISL_1470613, EPI_ISL_1470617, EPI_ISL_1470621, EPI_ISL_1470622, EPI_ISL_1470623, EPI_ISL_1470627, EPI_ISL_1470638, EPI_ISL_1470642, EPI_ISL_1470645, EPI_ISL_1470652, EPI_ISL_1470655, EPI_ISL_1470656, EPI_ISL_1470657, EPI_ISL_1470658, EPI_ISL_1470659, EPI_ISL_1470661, EPI_ISL_1470663, EPI_ISL_1470664, EPI_ISL_1470665, EPI_ISL_1470666, EPI_ISL_1470667, EPI_ISL_1470668, EPI_ISL_1470669, EPI_ISL_1470670, EPI_ISL_1470673, EPI_ISL_1470675, EPI_ISL_1470679, EPI_ISL_1470680, EPI_ISL_1470684, EPI_ISL_1470685, EPI_ISL_1470687, EPI_ISL_1470690, EPI_ISL_1470691, EPI_ISL_1470692, EPI_ISL_1470697, EPI_ISL_1470698, EPI_ISL_1470702, EPI_ISL_1470703, EPI_ISL_1470708, EPI_ISL_1470710, EPI_ISL_1470711, EPI_ISL_1470713, EPI_ISL_1470716, EPI_ISL_1470717, EPI_ISL_1470719, EPI_ISL_1470722, EPI_ISL_1470729, EPI_ISL_1470733, EPI_ISL_1470735, EPI_ISL_1470737, EPI_ISL_1470740                                                                                                                                                                                                                                                                                                                                                                                                                                                                                                                                                                                                                                                                                                                                                                                                                                                                                                                     | The Jackson Laboratory                                                                   | Bergeron D, Renzette N, Adams M, Omerza G, Kelly K, Li L                                  |                                                                                                                                                                                                                                                                                                                                                                                                                                                                                                                                                                                                                                                                                                                       |
| EPI_ISL_1470756, EPI_ISL_1470759, EPI_ISL_1470776, EPI_ISL_1470792, EPI_ISL_1470808, EPI_ISL_1470814, EPI_ISL_1470831, EPI_ISL_1470835, EPI_ISL_1470845, EPI_ISL_1470846, EPI_ISL_1470848, EPI_ISL_1470849, EPI_ISL_1470887, EPI_ISL_1470888, EPI_ISL_1470890, EPI_ISL_1470891, EPI_ISL_1470913, EPI_ISL_1470939, EPI_ISL_1470956, EPI_ISL_1470967, EPI_ISL_1470980, EPI_ISL_1470987, EPI_ISL_1470995, EPI_ISL_1470999, EPI_ISL_1471003, EPI_ISL_1471005, EPI_ISL_1471023, EPI_ISL_1471056, EPI_ISL_1471073, EPI_ISL_1471074, EPI_ISL_1471093, EPI_ISL_1471095, EPI_ISL_1471119, EPI_ISL_1471125, EPI_ISL_1471128, EPI_ISL_1471132, EPI_ISL_1471140, EPI_ISL_1471153, EPI_ISL_1471154, EPI_ISL_1471182, EPI_ISL_1471198, EPI_ISL_1471199, EPI_ISL_1471210, EPI_ISL_1471226, EPI_ISL_1471228, EPI_ISL_1471239, EPI_ISL_1471247, EPI_ISL_1471277, EPI_ISL_1471289, EPI_ISL_1471299, EPI_ISL_1471302, EPI_ISL_1471352, EPI_ISL_1471355, EPI_ISL_1471357, EPI_ISL_1471371, EPI_ISL_1471386, EPI_ISL_1471398, EPI_ISL_1471414, EPI_ISL_1471428, EPI_ISL_1471435, EPI_ISL_1471444, EPI_ISL_1471459, EPI_ISL_1471471, EPI_ISL_1471499, EPI_ISL_1471502, EPI_ISL_1471517, EPI_ISL_1471526, EPI_ISL_1471542, EPI_ISL_1471545, EPI_ISL_1471553, EPI_ISL_1471554, EPI_ISL_1471562, EPI_ISL_1471563, EPI_ISL_1471566, EPI_ISL_1471578, EPI_ISL_1471584, EPI_ISL_1471603, EPI_ISL_1471606, EPI_ISL_1471613, EPI_ISL_1471615, EPI_ISL_1471628, EPI_ISL_1471641, EPI_ISL_1471651, EPI_ISL_1471661, EPI_ISL_1471663, EPI_ISL_1471664, EPI_ISL_1471685, EPI_ISL_1471689, EPI_ISL_1471696, EPI_ISL_1471699, EPI_ISL_1471732, EPI_ISL_1471733, EPI_ISL_1471744, EPI_ISL_1471745, EPI_ISL_1471758, EPI_ISL_1471761, EPI_ISL_1471779, EPI_ISL_1471780, EPI_ISL_1471781, EPI_ISL_1471794, EPI_ISL_1471803, EPI_ISL_1471809, EPI_ISL_1471833, EPI_ISL_1471849, EPI_ISL_1471871, EPI_ISL_1471878, EPI_ISL_1471899, EPI_ISL_1471905, EPI_ISL_1471923, EPI_ISL_1471926, EPI_ISL_1471932, EPI_ISL_1471938, EPI_ISL_1471941, EPI_ISL_1471948, EPI_ISL_1471952, EPI_ISL_1471964, EPI_ISL_1471974, EPI_ISL_1472005, EPI_ISL_1472011, EPI_ISL_1472025, EPI_ISL_1472052 | The Jackson Laboratory                                                                   |                                                                                           |                                                                                                                                                                                                                                                                                                                                                                                                                                                                                                                                                                                                                                                                                                                       |
| see above                                                                                                                                                                                                                                                                                                                                                                                                                                                                                                                                                                                                                                                                                                                                                                                                                                                                                                                                                                                                                                                                                                                                                                                                                                                                                                                                                                                                                                                                                                                                                                                                                                                                                                                                                                                                                                                                                                                                                                                                                                                                                                                               | Pandemic Response Lab - NYC                                                              | Pandemic Response Lab, R&D                                                                | Henry Lee, Michael Hammerling, Melissa Hopkins, Cybill del Castillo, Shinyoung Clair Kang, William Ward, Pradeep Bugga, Sol Rey, Dylan Law, Haiping Hao, Jon Laurent                                                                                                                                                                                                                                                                                                                                                                                                                                                                                                                                                  |
| EPI_ISL_1472495, EPI_ISL_1472603                                                                                                                                                                                                                                                                                                                                                                                                                                                                                                                                                                                                                                                                                                                                                                                                                                                                                                                                                                                                                                                                                                                                                                                                                                                                                                                                                                                                                                                                                                                                                                                                                                                                                                                                                                                                                                                                                                                                                                                                                                                                                                        | Lighthouse Lab in Alderley Park                                                          | Wellcome Sanger Institute for the COVID-19 Genomics UK (COG-UK) Consortium                | Jacquelyn Wynn, Mairead Hyland, The Lighthouse Lab in Alderley Park and Alex Alderton, Roberto Amato, Jeffrey Barrett, Sonia Goncalves, Ewan Harrison, David K. Jackson, Ian Johnston, Dominic Kwiatkowski, Cordelia Langford, John Sillitoe on behalf of the Wellcome Sanger Institute COVID-19 Surveillance Team                                                                                                                                                                                                                                                                                                                                                                                                    |
| EPI_ISL_1472665, EPI_ISL_1472834                                                                                                                                                                                                                                                                                                                                                                                                                                                                                                                                                                                                                                                                                                                                                                                                                                                                                                                                                                                                                                                                                                                                                                                                                                                                                                                                                                                                                                                                                                                                                                                                                                                                                                                                                                                                                                                                                                                                                                                                                                                                                                        | Lighthouse Lab in Glasgow                                                                | Wellcome Sanger Institute for the COVID-19 Genomics UK (COG-UK) Consortium                | Harper VanSteenhouse, Yumi Kasai, David Gray, Carol Clugston, Anna Dominiczak and Alex Alderton, Roberto Amato, Jeffrey Barrett, Sonia Goncalves, Ewan Harrison, David K. Jackson, Ian Johnston, Dominic Kwiatkowski, Cordelia Langford, John Sillitoe on behalf of the Wellcome Sanger Institute COVID-19 Surveillance Team                                                                                                                                                                                                                                                                                                                                                                                          |
| EPI_ISL_1472935                                                                                                                                                                                                                                                                                                                                                                                                                                                                                                                                                                                                                                                                                                                                                                                                                                                                                                                                                                                                                                                                                                                                                                                                                                                                                                                                                                                                                                                                                                                                                                                                                                                                                                                                                                                                                                                                                                                                                                                                                                                                                                                         | Randox Laboratories                                                                      | Wellcome Sanger Institute for the COVID-19 Genomics UK (COG-UK) Consortium                | Randox Laboratories and Alex Alderton, Roberto Amato, Jeffrey Barrett, Sonia Goncalves, Ewan Harrison, David K. Jackson, Ian Johnston, Dominic Kwiatkowski, Cordelia Langford, John Sillitoe on behalf of the Wellcome Sanger Institute COVID-19 Surveillance Team                                                                                                                                                                                                                                                                                                                                                                                                                                                    |
| EPI_ISL_1473200                                                                                                                                                                                                                                                                                                                                                                                                                                                                                                                                                                                                                                                                                                                                                                                                                                                                                                                                                                                                                                                                                                                                                                                                                                                                                                                                                                                                                                                                                                                                                                                                                                                                                                                                                                                                                                                                                                                                                                                                                                                                                                                         | Lighthouse Lab in Glasgow                                                                | Wellcome Sanger Institute for the COVID-19 Genomics UK (COG-UK) Consortium                | Harper VanSteenhouse, Yumi Kasai, David Gray, Carol Clugston, Anna Dominiczak and Alex Alderton, Roberto Amato, Jeffrey Barrett, Sonia Goncalves, Ewan Harrison, David K. Jackson, Ian Johnston, Dominic Kwiatkowski, Cordelia Langford, John Sillitoe on behalf of the Wellcome Sanger Institute COVID-19 Surveillance Team                                                                                                                                                                                                                                                                                                                                                                                          |
| EPI_ISL_1473754                                                                                                                                                                                                                                                                                                                                                                                                                                                                                                                                                                                                                                                                                                                                                                                                                                                                                                                                                                                                                                                                                                                                                                                                                                                                                                                                                                                                                                                                                                                                                                                                                                                                                                                                                                                                                                                                                                                                                                                                                                                                                                                         | Lighthouse Lab in Cambridge                                                              | Wellcome Sanger Institute for the COVID-19 Genomics UK (COG-UK) Consortium                | Rob Howes, The Lighthouse Lab in Cambridge and Alex Alderton, Roberto Amato, Jeffrey Barrett, Sonia Goncalves, Ewan Harrison, David K. Jackson, Ian Johnston, Dominic Kwiatkowski, Cordelia Langford, John Sillitoe on behalf of the Wellcome Sanger Institute COVID-19 Surveillance Team                                                                                                                                                                                                                                                                                                                                                                                                                             |
| EPI_ISL_1473798                                                                                                                                                                                                                                                                                                                                                                                                                                                                                                                                                                                                                                                                                                                                                                                                                                                                                                                                                                                                                                                                                                                                                                                                                                                                                                                                                                                                                                                                                                                                                                                                                                                                                                                                                                                                                                                                                                                                                                                                                                                                                                                         | Randox Laboratories                                                                      | Wellcome Sanger Institute for the COVID-19 Genomics UK (COG-UK) Consortium                | Randox Laboratories and Alex Alderton, Roberto Amato, Jeffrey Barrett, Sonia Goncalves, Ewan Harrison, David K. Jackson, Ian Johnston, Dominic Kwiatkowski, Cordelia Langford, John Sillitoe on behalf of the Wellcome Sanger Institute COVID-19 Surveillance Team                                                                                                                                                                                                                                                                                                                                                                                                                                                    |
| EPI_ISL_1473863                                                                                                                                                                                                                                                                                                                                                                                                                                                                                                                                                                                                                                                                                                                                                                                                                                                                                                                                                                                                                                                                                                                                                                                                                                                                                                                                                                                                                                                                                                                                                                                                                                                                                                                                                                                                                                                                                                                                                                                                                                                                                                                         | Lighthouse Lab in Alderley Park                                                          | Wellcome Sanger Institute for the COVID-19 Genomics UK (COG-UK) Consortium                | Jacquelyn Wynn, Mairead Hyland, The Lighthouse Lab in Alderley Park and Alex Alderton, Roberto Amato, Jeffrey Barrett, Sonia Goncalves, Ewan Harrison, David K. Jackson, Ian Johnston, Dominic Kwiatkowski, Cordelia Langford, John Sillitoe on behalf of the Wellcome Sanger Institute COVID-19 Surveillance Team                                                                                                                                                                                                                                                                                                                                                                                                    |
| EPI_ISL_1474164                                                                                                                                                                                                                                                                                                                                                                                                                                                                                                                                                                                                                                                                                                                                                                                                                                                                                                                                                                                                                                                                                                                                                                                                                                                                                                                                                                                                                                                                                                                                                                                                                                                                                                                                                                                                                                                                                                                                                                                                                                                                                                                         | Lighthouse Lab in Cambridge                                                              | Wellcome Sanger Institute for the COVID-19 Genomics UK (COG-UK) Consortium                | Rob Howes, The Lighthouse Lab in Cambridge and Alex Alderton, Roberto Amato, Jeffrey Barrett, Sonia Goncalves, Ewan Harrison, David K. Jackson, Ian Johnston, Dominic Kwiatkowski, Cordelia Langford, John Sillitoe on behalf of the Wellcome Sanger Institute COVID-19 Surveillance Team                                                                                                                                                                                                                                                                                                                                                                                                                             |
| EPI_ISL_1474223                                                                                                                                                                                                                                                                                                                                                                                                                                                                                                                                                                                                                                                                                                                                                                                                                                                                                                                                                                                                                                                                                                                                                                                                                                                                                                                                                                                                                                                                                                                                                                                                                                                                                                                                                                                                                                                                                                                                                                                                                                                                                                                         | Quadram Institute Bioscience                                                             | COVID-19 Genomics UK (COG-UK) Consortium                                                  | Dave J. Baker, Gemma L. Kay, Alp Aydin, Thanh Le-Viet, Steven Rudder, Ana P. Tedim, Anastasia Kolyva, Maria Diaz, Leonardo de Oliveira Martins, Nabil-Fareed Alikhan, Lizzie Meadows, Rachael Stanley, Ngozi Elumogu, Muhammed Yasir, Nicholas M. Thomson, Alexander J Trotter, Rachel Gilroy, Samuel Bloomfield, Claire Stuart, Andrew Bell, Reenesh Prakash, Samir Dervisevic, Alison E. Mather, John Wain, Mark Webber, Andrew J. Page, Justin O'Grady                                                                                                                                                                                                                                                             |
| EPI_ISL_1475529                                                                                                                                                                                                                                                                                                                                                                                                                                                                                                                                                                                                                                                                                                                                                                                                                                                                                                                                                                                                                                                                                                                                                                                                                                                                                                                                                                                                                                                                                                                                                                                                                                                                                                                                                                                                                                                                                                                                                                                                                                                                                                                         | Lincolnshire Hospitals and DeepSeq Nottingham                                            | COVID-19 Genomics UK (COG-UK) Consortium                                                  | Nichola Duckworth, Tim Sloan, Sarah Walsh, Jonathan Ball, Patrick McClure, Joseph Chappell, Nadine Holmes, Matthew Carlisle, Christopher Moore, Fei Sang, Johnny Debebe, Victoria Wright, Matthew Loose                                                                                                                                                                                                                                                                                                                                                                                                                                                                                                               |
| EPI_ISL_1476149                                                                                                                                                                                                                                                                                                                                                                                                                                                                                                                                                                                                                                                                                                                                                                                                                                                                                                                                                                                                                                                                                                                                                                                                                                                                                                                                                                                                                                                                                                                                                                                                                                                                                                                                                                                                                                                                                                                                                                                                                                                                                                                         | Originating lab: Wales Specialist Virology Centre Sequencing lab: Pathogen Genomics Unit | Public Health Wales Microbiology Cardiff Wales Specialist Virology Centre                 | Catherine Moore, Johnathan Evans, Laura Gifford, Malorie Perry, Simon Cottrell, Angela Marchbank, Alec Birchley, Alexander Adams, Amy Gaskin, Bree Gatica-Wilcox, Jason Coombes, Joel Southgate, Lauren Gilbert, Lee Graham, Nicole Pacchiarini, Sara Kuzniene-Summerhayes, Sarah Taylor, Sophie Jones, Sara Rey, Matthew Bull, Joanne Watkins, Sally Corden, Tom Connor                                                                                                                                                                                                                                                                                                                                              |
| EPI_ISL_1477416                                                                                                                                                                                                                                                                                                                                                                                                                                                                                                                                                                                                                                                                                                                                                                                                                                                                                                                                                                                                                                                                                                                                                                                                                                                                                                                                                                                                                                                                                                                                                                                                                                                                                                                                                                                                                                                                                                                                                                                                                                                                                                                         | CA DPH Viral and Rickettsial Disease Laboratory                                          | Chan-Zuckerberg Biohub                                                                    | CZB Cliahub Consortium                                                                                                                                                                                                                                                                                                                                                                                                                                                                                                                                                                                                                                                                                                |
| EPI_ISL_1477675                                                                                                                                                                                                                                                                                                                                                                                                                                                                                                                                                                                                                                                                                                                                                                                                                                                                                                                                                                                                                                                                                                                                                                                                                                                                                                                                                                                                                                                                                                                                                                                                                                                                                                                                                                                                                                                                                                                                                                                                                                                                                                                         | Contra Costa County Public Health Lab                                                    | Chan-Zuckerberg Biohub                                                                    | CZB Cliahub Consortium                                                                                                                                                                                                                                                                                                                                                                                                                                                                                                                                                                                                                                                                                                |
| EPI_ISL_1477992                                                                                                                                                                                                                                                                                                                                                                                                                                                                                                                                                                                                                                                                                                                                                                                                                                                                                                                                                                                                                                                                                                                                                                                                                                                                                                                                                                                                                                                                                                                                                                                                                                                                                                                                                                                                                                                                                                                                                                                                                                                                                                                         | County of San Luis Obispo Public Health Laboratory                                       | Chan-Zuckerberg Biohub                                                                    | CZB Cliahub Consortium                                                                                                                                                                                                                                                                                                                                                                                                                                                                                                                                                                                                                                                                                                |
| EPI_ISL_1478293, EPI_ISL_1478301, EPI_ISL_1478461, EPI_ISL_1478491, EPI_ISL_1478541, EPI_ISL_1478676                                                                                                                                                                                                                                                                                                                                                                                                                                                                                                                                                                                                                                                                                                                                                                                                                                                                                                                                                                                                                                                                                                                                                                                                                                                                                                                                                                                                                                                                                                                                                                                                                                                                                                                                                                                                                                                                                                                                                                                                                                    | Public Health Ontario Laboratory                                                         | Public Health Ontario Laboratory                                                          | Vanessa G Allen, Philip Banh, Yao Chen, Richard de Borja, Alireza Eshaghi, Nahuel Fittipaldi, Christine Frantz, Jonathan B Gubbay, Jennifer L Guthrie, Lawrence Heisler, Esha Joshi, Michael Laszloffy, Aimin Li, Michael CY Li, Dean Maxwell, Sandeep Nagra, Samir N Patel, Jared Simpson, Karthikeyan Sivaraman, Ashleigh Sullivan, Yogi Sundaravadanam, Sarah Teatero, Andre Villegas, Matthew Watson, Sandra Zittermann                                                                                                                                                                                                                                                                                           |
| EPI_ISL_1478764, EPI_ISL_1478788, EPI_ISL_1478797                                                                                                                                                                                                                                                                                                                                                                                                                                                                                                                                                                                                                                                                                                                                                                                                                                                                                                                                                                                                                                                                                                                                                                                                                                                                                                                                                                                                                                                                                                                                                                                                                                                                                                                                                                                                                                                                                                                                                                                                                                                                                       | Microbiology Department. Complejo Hospitalario Universitario de Vigo                     | Microbiology Department. Complejo Hospitalario Universitario de Vigo                      | Alfaia N, Alonso I, Alvarez M, Cabrera JJ, Carballo R, Cores O, Cortizo S, del-Campo V, Martinez L, Mediero G, Perez S, Potel C, Regueiro B, Rey S, Vassallo FJ                                                                                                                                                                                                                                                                                                                                                                                                                                                                                                                                                       |
| EPI_ISL_1478855, EPI_ISL_1478874                                                                                                                                                                                                                                                                                                                                                                                                                                                                                                                                                                                                                                                                                                                                                                                                                                                                                                                                                                                                                                                                                                                                                                                                                                                                                                                                                                                                                                                                                                                                                                                                                                                                                                                                                                                                                                                                                                                                                                                                                                                                                                        | Illinois Department of Public Health - Springfield Lab                                   | Illinois Department of Public Health - Springfield Lab                                    | Bryan Sim, Gordon McCall                                                                                                                                                                                                                                                                                                                                                                                                                                                                                                                                                                                                                                                                                              |
| EPI_ISL_1480023, EPI_ISL_1480047, EPI_ISL_1480076, EPI_ISL_1480087, EPI_ISL_1480107, EPI_ISL_1480149, EPI_ISL_1480155, EPI_ISL_1480156, EPI_ISL_1480163, EPI_ISL_1480191, EPI_ISL_1480265, EPI_ISL_1480304, EPI_ISL_1480339, EPI_ISL_1480341, EPI_ISL_1480346, EPI_ISL_1480417, EPI_ISL_1480433, EPI_ISL_1480457                                                                                                                                                                                                                                                                                                                                                                                                                                                                                                                                                                                                                                                                                                                                                                                                                                                                                                                                                                                                                                                                                                                                                                                                                                                                                                                                                                                                                                                                                                                                                                                                                                                                                                                                                                                                                        | see above                                                                                | Centers for Disease Control and Prevention Division of Viral Diseases, Pathogen Discovery | Dakota Howard, Dhwaní Batra, Peter W. Cook, Kara Moser, Adrian Paskey, Jason Caravas, Benjamin Rambo-Martin, Shatavia Morrison, Christopher Gulvick, Scott Sammons, Yvette Onoarumi, Darlene Wagner, Matthew Schmeer, Eileen de Feo, Jan Antico, Christine Tran, Matthew Tolentino, Shannon Wickline, Kim Gietzen, Brad Sickler, Jingtao Liu, Eric Allen, Phil Febbo, Nicole L. Washington, Simon White, Geraint Lewis, Kelly Schiaber Barrett, Elizabeth Cirulli, Alexandre Bolze, Ary Ascencio, Charlotte Rivera-Garcia, Ryan Cho, Jason Nguyen, Sherry Wang, Jimmy Ramirez, Tyler Cassens, Efrén Sandoval, Magnus Isaksson, William Lee, David Becker, Marc Laurent, James Lu, Clinton R. Paden, Duncan MacCannell |
| EPI_ISL_1480523, EPI_ISL_1480528, EPI_ISL_1480530, EPI_ISL_1480584, EPI_ISL_1480594, EPI_ISL_1480599, EPI_ISL_1480604, EPI_ISL_1480608, EPI_ISL_1480620, EPI_ISL_1480621, EPI_ISL_1480630, EPI_ISL_1480631, EPI_ISL_1480639, EPI_ISL_1480654, EPI_ISL_1480664, EPI_ISL_1480668, EPI_ISL_1480670,                                                                                                                                                                                                                                                                                                                                                                                                                                                                                                                                                                                                                                                                                                                                                                                                                                                                                                                                                                                                                                                                                                                                                                                                                                                                                                                                                                                                                                                                                                                                                                                                                                                                                                                                                                                                                                        | see above                                                                                | Helix/Illumina                                                                            |                                                                                                                                                                                                                                                                                                                                                                                                                                                                                                                                                                                                                                                                                                                       |

|                                                                                                                                                                                                                                                                                                                                                                                                                                                                                                                                                                                                                                                                                                                                                                                                                                                                                                                                                                                                                                                                                                                                                                                                                                                                                                                                                                                                                |           |                                                                                                             |                                                                                           |                                                                                                                                                                                                                                                                                                                                                                                                                                                                                                                                                                                                                                                                                                                                                                                                                                                                                                                                                                                                                                               |
|----------------------------------------------------------------------------------------------------------------------------------------------------------------------------------------------------------------------------------------------------------------------------------------------------------------------------------------------------------------------------------------------------------------------------------------------------------------------------------------------------------------------------------------------------------------------------------------------------------------------------------------------------------------------------------------------------------------------------------------------------------------------------------------------------------------------------------------------------------------------------------------------------------------------------------------------------------------------------------------------------------------------------------------------------------------------------------------------------------------------------------------------------------------------------------------------------------------------------------------------------------------------------------------------------------------------------------------------------------------------------------------------------------------|-----------|-------------------------------------------------------------------------------------------------------------|-------------------------------------------------------------------------------------------|-----------------------------------------------------------------------------------------------------------------------------------------------------------------------------------------------------------------------------------------------------------------------------------------------------------------------------------------------------------------------------------------------------------------------------------------------------------------------------------------------------------------------------------------------------------------------------------------------------------------------------------------------------------------------------------------------------------------------------------------------------------------------------------------------------------------------------------------------------------------------------------------------------------------------------------------------------------------------------------------------------------------------------------------------|
| EPI_ISL_1480683, EPI_ISL_1480695, EPI_ISL_1480699, EPI_ISL_1480718, EPI_ISL_1480751, EPI_ISL_1480754, EPI_ISL_1480755, EPI_ISL_1480764, EPI_ISL_1480784, EPI_ISL_1480790, EPI_ISL_1480798, EPI_ISL_1480810, EPI_ISL_1480822, EPI_ISL_1480837, EPI_ISL_1480844, EPI_ISL_1480855, EPI_ISL_1480868, EPI_ISL_1480871, EPI_ISL_1480925, EPI_ISL_1480943, EPI_ISL_1480955, EPI_ISL_1480976                                                                                                                                                                                                                                                                                                                                                                                                                                                                                                                                                                                                                                                                                                                                                                                                                                                                                                                                                                                                                           | see above | Quest Diagnostics Incorporated                                                                              | Centers for Disease Control and Prevention Division of Viral Diseases, Pathogen Discovery | Dakota Howard, Dhvani Batra, Peter W. Cook, Kara Moser, Adrian Paskey, Jason Caravas, Benjamin Rambo-Martin, Shatavia Morrison, Christopher Gulvick, Scott Sammons, Yvette Unoarumhi, Darlene Wagner, Matthew Schmeier, S. H. Rosenthal, A. Gerasinova, R. M. Kagan, B. Anderson, M. Hua, Y. Liu, L.E. Bernstein, K.E. Livingston, A. Perez, I. A. Shlyakhter, R. V. Rolando, R. Owen, P. Tanpaiboon, F. Lacbawan, Clinton R. Paden, Duncan MacCannell                                                                                                                                                                                                                                                                                                                                                                                                                                                                                                                                                                                        |
| EPI_ISL_1480977, EPI_ISL_1481003, EPI_ISL_1481045, EPI_ISL_1481061, EPI_ISL_1481071, EPI_ISL_1481074, EPI_ISL_1481075, EPI_ISL_1481093, EPI_ISL_1481105, EPI_ISL_1481106, EPI_ISL_1481111, EPI_ISL_1481112, EPI_ISL_1481114, EPI_ISL_1481115, EPI_ISL_1481116, EPI_ISL_1481118, EPI_ISL_1481123, EPI_ISL_1481136, EPI_ISL_1481138, EPI_ISL_1481152, EPI_ISL_1481156, EPI_ISL_1481158, EPI_ISL_1481184, EPI_ISL_1481185, EPI_ISL_1481188, EPI_ISL_1481193, EPI_ISL_1481195, EPI_ISL_1481197, EPI_ISL_1481219, EPI_ISL_1481252, EPI_ISL_1481262, EPI_ISL_1481263, EPI_ISL_1481266, EPI_ISL_1481269, EPI_ISL_1481279, EPI_ISL_1481353, EPI_ISL_1481356, EPI_ISL_1481373, EPI_ISL_1481380, EPI_ISL_1481381, EPI_ISL_1481387, EPI_ISL_1481390, EPI_ISL_1481392, EPI_ISL_1481397, EPI_ISL_1481398, EPI_ISL_1481403, EPI_ISL_1481405, EPI_ISL_1481409, EPI_ISL_1481410, EPI_ISL_1481411, EPI_ISL_1481413, EPI_ISL_1481415, EPI_ISL_1481422, EPI_ISL_1481424, EPI_ISL_1481427, EPI_ISL_1481429, EPI_ISL_1481432, EPI_ISL_1481433, EPI_ISL_1481434, EPI_ISL_1481437, EPI_ISL_1481439, EPI_ISL_1481440, EPI_ISL_1481444, EPI_ISL_1481449, EPI_ISL_1481453, EPI_ISL_1481465, EPI_ISL_1481467, EPI_ISL_1481468, EPI_ISL_1481469, EPI_ISL_1481470, EPI_ISL_1481472, EPI_ISL_1481476, EPI_ISL_1481477, EPI_ISL_1481480, EPI_ISL_1481483, EPI_ISL_1481485, EPI_ISL_1481496, EPI_ISL_1481535, EPI_ISL_1481547, EPI_ISL_1481548 | see above | Laboratory Corporation of America                                                                           | Centers for Disease Control and Prevention Division of Viral Diseases, Pathogen Discovery | Dakota Howard, Dhvani Batra, Peter W. Cook, Kara Moser, Adrian Paskey, Jason Caravas, Benjamin Rambo-Martin, Shatavia Morrison, Christopher Gulvick, Scott Sammons, Yvette Unoarumhi, Darlene Wagner, Matthew Schmeier, Minoq Agarwal, Eyad Almasri, Debbie Boles, Ayla Burns, Nuthwin Charoensri, Oren Cohen, Susan Countryman, Mary Ann Cristobal, Bobbi Croy, Suzanne Dale, Hrushikesh Deshmukh, Amanda Douglas, Vincent Drouillon, Marcia Eisenberg, Howard Engler, Rama Ghatti, Prashant Gupta, Susan Hicks, Jake Humphrey, Lax lyer, Manoj Jain, Mohan Koli, Brian Krueger, Tim Kuphal, Stanley Letovsky, Michael Levandoski, Craig Lukasik, Jonathan Meltzer, Brian Norvell, Mindy Nye, Scott Parker, Christos Petropoulos, John Pruitt, Steven Ragan, Scott Ryan, Mike Sapeta, Jana Schroth, Suresh Babu Selvaraju, Goran Stevovic, Amanda Suchanek, Andrea Throop, Lyndon Tilson, Thomas Urban, Joe Voshell, Kimberly Wagner, Jonathan Williams, Mary Williamson, Qian Zeng, Tricia Zwielfhofer, Clinton R. Paden, Duncan MacCannell |
| EPI_ISL_1482313                                                                                                                                                                                                                                                                                                                                                                                                                                                                                                                                                                                                                                                                                                                                                                                                                                                                                                                                                                                                                                                                                                                                                                                                                                                                                                                                                                                                |           | URMC LABS                                                                                                   | Wadsworth Center, New York State Department of Health                                     | Kirsten St. George, Daryl M. Lamson, Alexis Russell, Matthew Shudt, Melissa A Leisner, Jonathan Plitnick, Catharine Prussing, Navjot Singh, John Kelly, Erasmus Schneider, Erica Lasek-Nesselquist                                                                                                                                                                                                                                                                                                                                                                                                                                                                                                                                                                                                                                                                                                                                                                                                                                            |
| EPI_ISL_1482334, EPI_ISL_1482335                                                                                                                                                                                                                                                                                                                                                                                                                                                                                                                                                                                                                                                                                                                                                                                                                                                                                                                                                                                                                                                                                                                                                                                                                                                                                                                                                                               |           | GLENS FALLS HOSPITAL LABORATORY                                                                             | Wadsworth Center, New York State Department of Health                                     | Kirsten St. George, Daryl M. Lamson, Alexis Russell, Matthew Shudt, Melissa A Leisner, Jonathan Plitnick, Catharine Prussing, Navjot Singh, John Kelly, Erasmus Schneider, Erica Lasek-Nesselquist                                                                                                                                                                                                                                                                                                                                                                                                                                                                                                                                                                                                                                                                                                                                                                                                                                            |
| EPI_ISL_1482342                                                                                                                                                                                                                                                                                                                                                                                                                                                                                                                                                                                                                                                                                                                                                                                                                                                                                                                                                                                                                                                                                                                                                                                                                                                                                                                                                                                                |           | MONTEFIORE NEW ROCHELLE HOSPITAL LABORATORY                                                                 | Wadsworth Center, New York State Department of Health                                     | Kirsten St. George, Daryl M. Lamson, Alexis Russell, Matthew Shudt, Melissa A Leisner, Jonathan Plitnick, Catharine Prussing, Navjot Singh, John Kelly, Erasmus Schneider, Erica Lasek-Nesselquist                                                                                                                                                                                                                                                                                                                                                                                                                                                                                                                                                                                                                                                                                                                                                                                                                                            |
| EPI_ISL_1482346                                                                                                                                                                                                                                                                                                                                                                                                                                                                                                                                                                                                                                                                                                                                                                                                                                                                                                                                                                                                                                                                                                                                                                                                                                                                                                                                                                                                |           | NORTH SHORE UNIVERSITY HOSPITAL                                                                             | Wadsworth Center, New York State Department of Health                                     | Kirsten St. George, Daryl M. Lamson, Alexis Russell, Matthew Shudt, Melissa A Leisner, Jonathan Plitnick, Catharine Prussing, Navjot Singh, John Kelly, Erasmus Schneider, Erica Lasek-Nesselquist                                                                                                                                                                                                                                                                                                                                                                                                                                                                                                                                                                                                                                                                                                                                                                                                                                            |
| EPI_ISL_1482419, EPI_ISL_1482432, EPI_ISL_1482442, EPI_ISL_1482444, EPI_ISL_1482445                                                                                                                                                                                                                                                                                                                                                                                                                                                                                                                                                                                                                                                                                                                                                                                                                                                                                                                                                                                                                                                                                                                                                                                                                                                                                                                            |           | WESTCHESTER MEDICAL CENTER                                                                                  | Wadsworth Center, New York State Department of Health                                     | Kirsten St. George, Daryl M. Lamson, Alexis Russell, Matthew Shudt, Melissa A Leisner, Jonathan Plitnick, Catharine Prussing, Navjot Singh, John Kelly, Erasmus Schneider, Erica Lasek-Nesselquist                                                                                                                                                                                                                                                                                                                                                                                                                                                                                                                                                                                                                                                                                                                                                                                                                                            |
| EPI_ISL_1482448                                                                                                                                                                                                                                                                                                                                                                                                                                                                                                                                                                                                                                                                                                                                                                                                                                                                                                                                                                                                                                                                                                                                                                                                                                                                                                                                                                                                |           | BOSTON HEART DIAGNOSTICS CORP                                                                               | Wadsworth Center, New York State Department of Health                                     | Kirsten St. George, Daryl M. Lamson, Alexis Russell, Matthew Shudt, Melissa A Leisner, Jonathan Plitnick, Catharine Prussing, Navjot Singh, John Kelly, Erasmus Schneider, Erica Lasek-Nesselquist                                                                                                                                                                                                                                                                                                                                                                                                                                                                                                                                                                                                                                                                                                                                                                                                                                            |
| EPI_ISL_1482459, EPI_ISL_1482460, EPI_ISL_1482467, EPI_ISL_1482468, EPI_ISL_1482469                                                                                                                                                                                                                                                                                                                                                                                                                                                                                                                                                                                                                                                                                                                                                                                                                                                                                                                                                                                                                                                                                                                                                                                                                                                                                                                            |           | ALBANY MEDICAL CENTER                                                                                       | Wadsworth Center, New York State Department of Health                                     | Kirsten St. George, Daryl M. Lamson, Alexis Russell, Matthew Shudt, Melissa A Leisner, Jonathan Plitnick, Catharine Prussing, Navjot Singh, John Kelly, Erasmus Schneider, Erica Lasek-Nesselquist                                                                                                                                                                                                                                                                                                                                                                                                                                                                                                                                                                                                                                                                                                                                                                                                                                            |
| EPI_ISL_1482542                                                                                                                                                                                                                                                                                                                                                                                                                                                                                                                                                                                                                                                                                                                                                                                                                                                                                                                                                                                                                                                                                                                                                                                                                                                                                                                                                                                                |           | WESTCHESTER MEDICAL CENTER                                                                                  | Wadsworth Center, New York State Department of Health                                     | Kirsten St. George, Daryl M. Lamson, Alexis Russell, Matthew Shudt, Melissa A Leisner, Jonathan Plitnick, Catharine Prussing, Navjot Singh, John Kelly, Erasmus Schneider, Erica Lasek-Nesselquist                                                                                                                                                                                                                                                                                                                                                                                                                                                                                                                                                                                                                                                                                                                                                                                                                                            |
| EPI_ISL_1482570                                                                                                                                                                                                                                                                                                                                                                                                                                                                                                                                                                                                                                                                                                                                                                                                                                                                                                                                                                                                                                                                                                                                                                                                                                                                                                                                                                                                |           | NORTHWELL HEALTH LABORATORIES                                                                               | Wadsworth Center, New York State Department of Health                                     | Kirsten St. George, Daryl M. Lamson, Alexis Russell, Matthew Shudt, Melissa A Leisner, Jonathan Plitnick, Catharine Prussing, Navjot Singh, John Kelly, Erasmus Schneider, Erica Lasek-Nesselquist                                                                                                                                                                                                                                                                                                                                                                                                                                                                                                                                                                                                                                                                                                                                                                                                                                            |
| EPI_ISL_1482574, EPI_ISL_1482578, EPI_ISL_1482579                                                                                                                                                                                                                                                                                                                                                                                                                                                                                                                                                                                                                                                                                                                                                                                                                                                                                                                                                                                                                                                                                                                                                                                                                                                                                                                                                              |           | WHITE PLAINS HOSPITAL CENTER LABORATORY                                                                     | Wadsworth Center, New York State Department of Health                                     | Kirsten St. George, Daryl M. Lamson, Alexis Russell, Matthew Shudt, Melissa A Leisner, Jonathan Plitnick, Catharine Prussing, Navjot Singh, John Kelly, Erasmus Schneider, Erica Lasek-Nesselquist                                                                                                                                                                                                                                                                                                                                                                                                                                                                                                                                                                                                                                                                                                                                                                                                                                            |
| EPI_ISL_1482580, EPI_ISL_1482586, EPI_ISL_1482599, EPI_ISL_1482602, EPI_ISL_1482605, EPI_ISL_1482610                                                                                                                                                                                                                                                                                                                                                                                                                                                                                                                                                                                                                                                                                                                                                                                                                                                                                                                                                                                                                                                                                                                                                                                                                                                                                                           |           | NORTHWELL HEALTH LABORATORIES                                                                               | Wadsworth Center, New York State Department of Health                                     | Kirsten St. George, Daryl M. Lamson, Alexis Russell, Matthew Shudt, Melissa A Leisner, Jonathan Plitnick, Catharine Prussing, Navjot Singh, John Kelly, Erasmus Schneider, Erica Lasek-Nesselquist                                                                                                                                                                                                                                                                                                                                                                                                                                                                                                                                                                                                                                                                                                                                                                                                                                            |
| EPI_ISL_1482928, EPI_ISL_1482936, EPI_ISL_1482949                                                                                                                                                                                                                                                                                                                                                                                                                                                                                                                                                                                                                                                                                                                                                                                                                                                                                                                                                                                                                                                                                                                                                                                                                                                                                                                                                              |           | MUSC Molecular Pathology Laboratory                                                                         | MUSC Molecular Pathology Laboratory                                                       | Julie W. Hirschhorn, W. Bailey Glen Jr, Dariusz Pytel, Jaclyn Dunne, Kristen Maurer, Frederick S. Nolte                                                                                                                                                                                                                                                                                                                                                                                                                                                                                                                                                                                                                                                                                                                                                                                                                                                                                                                                       |
| EPI_ISL_1483081                                                                                                                                                                                                                                                                                                                                                                                                                                                                                                                                                                                                                                                                                                                                                                                                                                                                                                                                                                                                                                                                                                                                                                                                                                                                                                                                                                                                |           | Utah Public Health Laboratory                                                                               | Utah Public Health Laboratory                                                             | Erin L. Young, Kelly F. Oakeson, Tara Gallagher                                                                                                                                                                                                                                                                                                                                                                                                                                                                                                                                                                                                                                                                                                                                                                                                                                                                                                                                                                                               |
| EPI_ISL_1483436                                                                                                                                                                                                                                                                                                                                                                                                                                                                                                                                                                                                                                                                                                                                                                                                                                                                                                                                                                                                                                                                                                                                                                                                                                                                                                                                                                                                |           | National Virus Reference Laboratory                                                                         | National Virus Reference Laboratory                                                       | Guerrino Macori, Gabriel Gonzalez, Michael Carr, Zoe Yandle, Charlene Bennett, Jonathan Dean, Seamus Fanning, Cillian F De Gascun                                                                                                                                                                                                                                                                                                                                                                                                                                                                                                                                                                                                                                                                                                                                                                                                                                                                                                             |
| EPI_ISL_1483651, EPI_ISL_1483696                                                                                                                                                                                                                                                                                                                                                                                                                                                                                                                                                                                                                                                                                                                                                                                                                                                                                                                                                                                                                                                                                                                                                                                                                                                                                                                                                                               |           | Alaska State Virology Laboratory                                                                            | Alaska State Virology Laboratory                                                          | Stephanie DeRonde, Elva House, Lisa Smith, Ph.D., Jack Chen, Ph.D.                                                                                                                                                                                                                                                                                                                                                                                                                                                                                                                                                                                                                                                                                                                                                                                                                                                                                                                                                                            |
| EPI_ISL_1483730, EPI_ISL_1483784                                                                                                                                                                                                                                                                                                                                                                                                                                                                                                                                                                                                                                                                                                                                                                                                                                                                                                                                                                                                                                                                                                                                                                                                                                                                                                                                                                               |           | Centre Hospitalier Universitaire Clermont-Ferrand                                                           | CHU Clermont-Ferrand, service de virologie                                                | Bisseux Maxime, Mirand Audrey, Combes Patricia, Henquell Cécile                                                                                                                                                                                                                                                                                                                                                                                                                                                                                                                                                                                                                                                                                                                                                                                                                                                                                                                                                                               |
| EPI_ISL_1483798                                                                                                                                                                                                                                                                                                                                                                                                                                                                                                                                                                                                                                                                                                                                                                                                                                                                                                                                                                                                                                                                                                                                                                                                                                                                                                                                                                                                |           | Stanford Clinical Virology Laboratory                                                                       | Santa Clara County Public Health Laboratory                                               | Santa Clara County Public Health Department                                                                                                                                                                                                                                                                                                                                                                                                                                                                                                                                                                                                                                                                                                                                                                                                                                                                                                                                                                                                   |
| EPI_ISL_1483848, EPI_ISL_1483961                                                                                                                                                                                                                                                                                                                                                                                                                                                                                                                                                                                                                                                                                                                                                                                                                                                                                                                                                                                                                                                                                                                                                                                                                                                                                                                                                                               |           | Lighthouse Lab in Alderley Park                                                                             | Wellcome Sanger Institute for the COVID-19 Genomics UK (COG-UK) Consortium                | Jacquelyn Wynn, Mairead Hyland, The Lighthouse Lab in Alderley Park and Alex Alderton, Roberto Amato, Jeffrey Barrett, Sonia Goncalves, Ewan Harrison, David K. Jackson, Ian Johnston, Dominic Kwiatkowski, Cordelia Langford, John Sillitoe on behalf of the Wellcome Sanger Institute COVID-19 Surveillance Team                                                                                                                                                                                                                                                                                                                                                                                                                                                                                                                                                                                                                                                                                                                            |
| EPI_ISL_1484370                                                                                                                                                                                                                                                                                                                                                                                                                                                                                                                                                                                                                                                                                                                                                                                                                                                                                                                                                                                                                                                                                                                                                                                                                                                                                                                                                                                                |           | Lighthouse Lab in Cambridge                                                                                 | Wellcome Sanger Institute for the COVID-19 Genomics UK (COG-UK) Consortium                | Rob Howes, The Lighthouse Lab in Cambridge and Alex Alderton, Roberto Amato, Jeffrey Barrett, Sonia Goncalves, Ewan Harrison, David K. Jackson, Ian Johnston, Dominic Kwiatkowski, Cordelia Langford, John Sillitoe on behalf of the Wellcome Sanger Institute COVID-19 Surveillance Team                                                                                                                                                                                                                                                                                                                                                                                                                                                                                                                                                                                                                                                                                                                                                     |
| EPI_ISL_1484815                                                                                                                                                                                                                                                                                                                                                                                                                                                                                                                                                                                                                                                                                                                                                                                                                                                                                                                                                                                                                                                                                                                                                                                                                                                                                                                                                                                                |           | Lighthouse Lab in Glasgow                                                                                   | Wellcome Sanger Institute for the COVID-19 Genomics UK (COG-UK) Consortium                | Harper VanSteenhouse, Yumi Kasai, David Gray, Carol Clugston, Anna Dominiczak and Alex Alderton, Roberto Amato, Jeffrey Barrett, Sonia Goncalves, Ewan Harrison, David K. Jackson, Ian Johnston, Dominic Kwiatkowski, Cordelia Langford, John Sillitoe on behalf of the Wellcome Sanger Institute COVID-19 Surveillance Team                                                                                                                                                                                                                                                                                                                                                                                                                                                                                                                                                                                                                                                                                                                  |
| EPI_ISL_1485176                                                                                                                                                                                                                                                                                                                                                                                                                                                                                                                                                                                                                                                                                                                                                                                                                                                                                                                                                                                                                                                                                                                                                                                                                                                                                                                                                                                                |           | Lighthouse Lab in Alderley Park                                                                             | Wellcome Sanger Institute for the COVID-19 Genomics UK (COG-UK) Consortium                | Jacquelyn Wynn, Mairead Hyland, The Lighthouse Lab in Alderley Park and Alex Alderton, Roberto Amato, Jeffrey Barrett, Sonia Goncalves, Ewan Harrison, David K. Jackson, Ian Johnston, Dominic Kwiatkowski, Cordelia Langford, John Sillitoe on behalf of the Wellcome Sanger Institute COVID-19 Surveillance Team                                                                                                                                                                                                                                                                                                                                                                                                                                                                                                                                                                                                                                                                                                                            |
| EPI_ISL_1485613                                                                                                                                                                                                                                                                                                                                                                                                                                                                                                                                                                                                                                                                                                                                                                                                                                                                                                                                                                                                                                                                                                                                                                                                                                                                                                                                                                                                |           | Randox Laboratories                                                                                         | Wellcome Sanger Institute for the COVID-19 Genomics UK (COG-UK) Consortium                | Randox Laboratories and Alex Alderton, Roberto Amato, Jeffrey Barrett, Sonia Goncalves, Ewan Harrison, David K. Jackson, Ian Johnston, Dominic Kwiatkowski, Cordelia Langford, John Sillitoe on behalf of the Wellcome Sanger Institute COVID-19 Surveillance Team                                                                                                                                                                                                                                                                                                                                                                                                                                                                                                                                                                                                                                                                                                                                                                            |
| EPI_ISL_1485772, EPI_ISL_1485666                                                                                                                                                                                                                                                                                                                                                                                                                                                                                                                                                                                                                                                                                                                                                                                                                                                                                                                                                                                                                                                                                                                                                                                                                                                                                                                                                                               |           | Lighthouse Lab in Alderley Park                                                                             | Wellcome Sanger Institute for the COVID-19 Genomics UK (COG-UK) Consortium                | Jacquelyn Wynn, Mairead Hyland, The Lighthouse Lab in Alderley Park and Alex Alderton, Roberto Amato, Jeffrey Barrett, Sonia Goncalves, Ewan Harrison, David K. Jackson, Ian Johnston, Dominic Kwiatkowski, Cordelia Langford, John Sillitoe on behalf of the Wellcome Sanger Institute COVID-19 Surveillance Team                                                                                                                                                                                                                                                                                                                                                                                                                                                                                                                                                                                                                                                                                                                            |
| EPI_ISL_1486706                                                                                                                                                                                                                                                                                                                                                                                                                                                                                                                                                                                                                                                                                                                                                                                                                                                                                                                                                                                                                                                                                                                                                                                                                                                                                                                                                                                                |           | Microbiology Department, Laboratori Clínic Metropolitana Nord. Hospital Universitari Germans Trias i Pujol. | Can Ruti SARS-CoV-2 Sequencing Hub (HUGTIP/IsriCaixa/IGTP)                                | Marc Noguera-Julian, Pilar Armengol, Ignacio Blanco, Antoni E Bordoy, Francesc Catala-Moll, Pere-Joan Cardona, Maria Casadellà, Cristina Casañ, Gemma Clara, Bonaventura Clotet, Cristina Esteban, Montserrat Giménez, Mercedes Guerrero, Anna Not, Roger Paredes, Mariona Parera, Verónica Saludes, Alba Sánchez, and Elisa Martró on behalf of the Can Ruti SARS-CoV-2 Sequencing Hub.                                                                                                                                                                                                                                                                                                                                                                                                                                                                                                                                                                                                                                                      |
| EPI_ISL_1487150                                                                                                                                                                                                                                                                                                                                                                                                                                                                                                                                                                                                                                                                                                                                                                                                                                                                                                                                                                                                                                                                                                                                                                                                                                                                                                                                                                                                |           | Lighthouse Lab in Alderley Park                                                                             | Wellcome Sanger Institute for the COVID-19 Genomics UK (COG-UK) Consortium                | Jacquelyn Wynn, Mairead Hyland, The Lighthouse Lab in Alderley Park and Alex Alderton, Roberto Amato, Jeffrey Barrett, Sonia Goncalves, Ewan Harrison, David K. Jackson, Ian Johnston, Dominic Kwiatkowski, Cordelia Langford, John Sillitoe on behalf of the Wellcome Sanger Institute COVID-19 Surveillance Team                                                                                                                                                                                                                                                                                                                                                                                                                                                                                                                                                                                                                                                                                                                            |
| EPI_ISL_1487199                                                                                                                                                                                                                                                                                                                                                                                                                                                                                                                                                                                                                                                                                                                                                                                                                                                                                                                                                                                                                                                                                                                                                                                                                                                                                                                                                                                                |           | Lighthouse Lab in Glasgow                                                                                   | Wellcome Sanger Institute for the COVID-19 Genomics UK                                    | Harper VanSteenhouse, Yumi Kasai, David Gray, Carol Clugston, Anna Dominiczak and Alex Alderton, Roberto Amato, Jeffrey Barrett, Sonia Goncalves,                                                                                                                                                                                                                                                                                                                                                                                                                                                                                                                                                                                                                                                                                                                                                                                                                                                                                             |

|                                                                                                                                                                                                                                                                                                                                                                                                                                         |                                                                                                           |                                                                                                                                   |                                                                                                                                                                                                                                                                                                                                                                                                                                                                                                                                                                                                                                                                                                                          |
|-----------------------------------------------------------------------------------------------------------------------------------------------------------------------------------------------------------------------------------------------------------------------------------------------------------------------------------------------------------------------------------------------------------------------------------------|-----------------------------------------------------------------------------------------------------------|-----------------------------------------------------------------------------------------------------------------------------------|--------------------------------------------------------------------------------------------------------------------------------------------------------------------------------------------------------------------------------------------------------------------------------------------------------------------------------------------------------------------------------------------------------------------------------------------------------------------------------------------------------------------------------------------------------------------------------------------------------------------------------------------------------------------------------------------------------------------------|
|                                                                                                                                                                                                                                                                                                                                                                                                                                         |                                                                                                           | (COG-UK) Consortium                                                                                                               | Ewan Harrison, David K. Jackson, Ian Johnston, Dominic Kwiatkowski, Cordelia Langford, John Sillitoe on behalf of the Wellcome Sanger Institute COVID-19 Surveillance Team                                                                                                                                                                                                                                                                                                                                                                                                                                                                                                                                               |
| EPI_ISL_1487934, EPI_ISL_1488151, EPI_ISL_1488180, EPI_ISL_1488671                                                                                                                                                                                                                                                                                                                                                                      | Lighthouse Lab in Alderley Park                                                                           | Wellcome Sanger Institute for the COVID-19 Genomics UK (COG-UK) Consortium                                                        | Jacquelyn Wynn, Mairead Hyland, The Lighthouse Lab in Alderley Park and Alex Alderton, Roberto Amato, Jeffrey Barrett, Sonia Goncalves, Ewan Harrison, David K. Jackson, Ian Johnston, Dominic Kwiatkowski, Cordelia Langford, John Sillitoe on behalf of the Wellcome Sanger Institute COVID-19 Surveillance Team                                                                                                                                                                                                                                                                                                                                                                                                       |
| EPI_ISL_1488999                                                                                                                                                                                                                                                                                                                                                                                                                         | Lighthouse Lab in Glasgow                                                                                 | Wellcome Sanger Institute for the COVID-19 Genomics UK (COG-UK) Consortium                                                        | Harper VanSteenhouse, Yumi Kasai, David Gray, Carol Clugston, Anna Dominiczak and Alex Alderton, Roberto Amato, Jeffrey Barrett, Sonia Goncalves, Ewan Harrison, David K. Jackson, Ian Johnston, Dominic Kwiatkowski, Cordelia Langford, John Sillitoe on behalf of the Wellcome Sanger Institute COVID-19 Surveillance Team                                                                                                                                                                                                                                                                                                                                                                                             |
| EPI_ISL_1489175, EPI_ISL_1489317                                                                                                                                                                                                                                                                                                                                                                                                        | Randox Laboratories                                                                                       | Wellcome Sanger Institute for the COVID-19 Genomics UK (COG-UK) Consortium                                                        | Randox Laboratories and Alex Alderton, Roberto Amato, Jeffrey Barrett, Sonia Goncalves, Ewan Harrison, David K. Jackson, Ian Johnston, Dominic Kwiatkowski, Cordelia Langford, John Sillitoe on behalf of the Wellcome Sanger Institute COVID-19 Surveillance Team                                                                                                                                                                                                                                                                                                                                                                                                                                                       |
| EPI_ISL_1489658, EPI_ISL_1489669, EPI_ISL_1489670, EPI_ISL_1489671, EPI_ISL_1489683, EPI_ISL_1489699, EPI_ISL_1489713, EPI_ISL_1489715                                                                                                                                                                                                                                                                                                  | NJDOH, Public Health and Environmental Laboratories                                                       | New Jersey Public Health and Environmental Laboratories (NJ PHEL)                                                                 | Lindsay Bodnar, Shiv K. Verma, Dana Woell, Byeong Jeong                                                                                                                                                                                                                                                                                                                                                                                                                                                                                                                                                                                                                                                                  |
| EPI_ISL_1489718                                                                                                                                                                                                                                                                                                                                                                                                                         | National Public Health Laboratory, National Centre for Infectious Diseases                                | National Public Health Laboratory, National Centre for Infectious Diseases                                                        | Tze Minn Mak, Zhenyang Zhou, Grace Jie Yin Ngan, Royce Ang, Lin Cui, Raymond Tzer Pin Lin                                                                                                                                                                                                                                                                                                                                                                                                                                                                                                                                                                                                                                |
| EPI_ISL_1489736                                                                                                                                                                                                                                                                                                                                                                                                                         | Labo Analyses Med                                                                                         | National Reference Center for Viruses of Respiratory Infections, Institut Pasteur, Paris                                          | Marion Barbet, Sylvie Behillil, Frédéric Lemoine, Corinne Maufrais, Christophe Malabat, Amaury Vaysse, Méline Bizard, Angela Brisebarre, Camille Capel, Louise Lefrançois, Etienne Simon-Lorière, Vincent Enouf, Maud Vanpeene, Sylvie van der Werf, Ophélie Said-Delattre                                                                                                                                                                                                                                                                                                                                                                                                                                               |
| EPI_ISL_1489876, EPI_ISL_1489878, EPI_ISL_1489883, EPI_ISL_1489892, EPI_ISL_1489894, EPI_ISL_1489898, EPI_ISL_1489900, EPI_ISL_1489909                                                                                                                                                                                                                                                                                                  | Missouri State Public Health Laboratory                                                                   | Missouri State Public Health Laboratory                                                                                           | Matthew Sinn, Joshua Barry, Ashley New                                                                                                                                                                                                                                                                                                                                                                                                                                                                                                                                                                                                                                                                                   |
| EPI_ISL_1490321                                                                                                                                                                                                                                                                                                                                                                                                                         | Furst Medical Laboratory                                                                                  | Norwegian Institute of Public Health, Department of Virology                                                                      | Kathrine Stene-Johansen, Kamilla Heddeland Instefjord, Hilde Elshaug, Garcia Llorente Ignacio, Jon Bråte, Engebretsen Serina Beate, Pedersen Benedikte Nevjen, Debech Nadia, Atiya R Ali, Marie Paulsen Madsen, Rasmus Riis Kopperud, Hilde Vollan, Karoline Bragstad, Olav Hungnes                                                                                                                                                                                                                                                                                                                                                                                                                                      |
| EPI_ISL_1490439                                                                                                                                                                                                                                                                                                                                                                                                                         | Norwegian Institute of Public Health, Department of Virology                                              | Norwegian Institute of Public Health, Department of Virology                                                                      | Kathrine Stene-Johansen, Kamilla Heddeland Instefjord, Hilde Elshaug, Garcia Llorente Ignacio, Jon Bråte, Engebretsen Serina Beate, Pedersen Benedikte Nevjen, Debech Nadia, Atiya R Ali, Marie Paulsen Madsen, Rasmus Riis Kopperud, Hilde Vollan, Karoline Bragstad, Olav Hungnes                                                                                                                                                                                                                                                                                                                                                                                                                                      |
| EPI_ISL_1490716                                                                                                                                                                                                                                                                                                                                                                                                                         | Baylor Esoteric and Molecular Lab                                                                         | Baylor Esoteric and Molecular Lab                                                                                                 | Elizabeth Forrester and Dawn Richards                                                                                                                                                                                                                                                                                                                                                                                                                                                                                                                                                                                                                                                                                    |
| EPI_ISL_1490770                                                                                                                                                                                                                                                                                                                                                                                                                         | IN State Department of Health Laboratory Services                                                         | IN State Department of Health Laboratory Services                                                                                 | Cassandra Campion, Jamie Yeadon, Brian Pope, Lixia Liu, Kyle Brownlee, Melissa Hindenlang, Ankit Kashikar, Mark Glazier                                                                                                                                                                                                                                                                                                                                                                                                                                                                                                                                                                                                  |
| EPI_ISL_1490959                                                                                                                                                                                                                                                                                                                                                                                                                         | National Laboratory for Health, Environment and Food, OMM, Novo mesto                                     | CISLD (Clinical Institute of Special Laboratory Diagnostics), University Children's Hospital, University Medical Center Ljubljana | Jernej Kova, Barbara Jenko Bizjan, Tine Tesovnik, Robert Šket, Katarina Kozmos, Ana Grom, Maruša Debeljak, Marko Pokorn, Tadej Battelino                                                                                                                                                                                                                                                                                                                                                                                                                                                                                                                                                                                 |
| EPI_ISL_1490990                                                                                                                                                                                                                                                                                                                                                                                                                         | National Laboratory for Health, Environment and Food, OMM, Maribor                                        | CISLD (Clinical Institute of Special Laboratory Diagnostics), University Children's Hospital, University Medical Center Ljubljana | Jernej Kova, Barbara Jenko Bizjan, Tine Tesovnik, Robert Šket, Katarina Kozmos, Ana Grom, Maruša Debeljak, Marko Pokorn, Tadej Battelino                                                                                                                                                                                                                                                                                                                                                                                                                                                                                                                                                                                 |
| EPI_ISL_1491054                                                                                                                                                                                                                                                                                                                                                                                                                         | Baylor Esoteric and Molecular Lab                                                                         | Baylor Esoteric and Molecular Lab                                                                                                 | Elizabeth Forrester and Dawn Richards                                                                                                                                                                                                                                                                                                                                                                                                                                                                                                                                                                                                                                                                                    |
| EPI_ISL_1491140                                                                                                                                                                                                                                                                                                                                                                                                                         | National Laboratory for Health, Environment and Food, OMM, Celje                                          | CISLD (Clinical Institute of Special Laboratory Diagnostics), University Children's Hospital, University Medical Center Ljubljana | Jernej Kova, Barbara Jenko Bizjan, Tine Tesovnik, Robert Šket, Katarina Kozmos, Ana Grom, Maruša Debeljak, Marko Pokorn, Tadej Battelino                                                                                                                                                                                                                                                                                                                                                                                                                                                                                                                                                                                 |
| EPI_ISL_1491342                                                                                                                                                                                                                                                                                                                                                                                                                         | Gravity Diagnostics                                                                                       | Kentucky State Public Health Lab                                                                                                  | Stephanie Lunn, Karim George, Joshua Tobias, William Grooms, Vaneet Arora, Matthew Johnson, Rachel Zinner, Rhonda Lucas                                                                                                                                                                                                                                                                                                                                                                                                                                                                                                                                                                                                  |
| EPI_ISL_1491373                                                                                                                                                                                                                                                                                                                                                                                                                         | Kentucky State Public Health Lab                                                                          | Kentucky State Public Health Lab                                                                                                  | Stephanie Lunn, Karim George, Joshua Tobias, William Grooms, Vaneet Arora, Matthew Johnson, Rachel Zinner, Rhonda Lucas                                                                                                                                                                                                                                                                                                                                                                                                                                                                                                                                                                                                  |
| EPI_ISL_1491600                                                                                                                                                                                                                                                                                                                                                                                                                         | HELIX LLC                                                                                                 | WHO National Influenza Centre Russian Federation                                                                                  | Andrey Komissarov, Artem Fadeev, Anna Ivanova, Kseniya Komissarova, Alexey Masharsky, Maria Baturova, Dmitry Bazhenov, Tamila Musaveva, Maria Timofeeva, Veronika Eder, Maria Pisareva, Maria Danilenko, Ksenia Safina, Elena Nabieva, Georgii Bazykin, Dmitry Lioznov                                                                                                                                                                                                                                                                                                                                                                                                                                                   |
| EPI_ISL_1492087, EPI_ISL_1492089, EPI_ISL_1492090, EPI_ISL_1492203, EPI_ISL_1492222, EPI_ISL_1492233, EPI_ISL_1492251, EPI_ISL_1492291, EPI_ISL_1492338, EPI_ISL_1492396, EPI_ISL_1492414, EPI_ISL_1492420, EPI_ISL_1492435, EPI_ISL_1492443                                                                                                                                                                                            | see above                                                                                                 | National Institute of Public Health                                                                                               | Helena Jirincova, Jaromira Vecerova, Timotej Suri, Dusan Trnka, Alexander Nagy                                                                                                                                                                                                                                                                                                                                                                                                                                                                                                                                                                                                                                           |
| EPI_ISL_1492626                                                                                                                                                                                                                                                                                                                                                                                                                         | Idaho Bureau of Laboratories                                                                              | Idaho Bureau of Laboratories                                                                                                      | "R. Beukelman, Matthew Charles Burns, Aimee Ceniseros, Robert L. Voermans, Christopher Ball"                                                                                                                                                                                                                                                                                                                                                                                                                                                                                                                                                                                                                             |
| EPI_ISL_1493331, EPI_ISL_1493349                                                                                                                                                                                                                                                                                                                                                                                                        | Wojewodzka Stacja Sanitarno-Epidemiologiczna w Olsztynie, Laboratorium Badan Epidemiologiczno-Klinicznych | Wojewodzka Stacja Sanitarno-Epidemiologiczna w Olsztynie, Laboratorium Badan Epidemiologiczno-Klinicznych                         | Sylwia Krzetowska, Monika Czerminska, Ewa Liszewska, Tomasz Jakubczak, Marta Lukian, Patryk Bielecki, Aleksandra Kobiatko, Emilia Tarabasz, Paulina Rozycka, Barbara Dolinska                                                                                                                                                                                                                                                                                                                                                                                                                                                                                                                                            |
| EPI_ISL_1493440, EPI_ISL_1493461, EPI_ISL_1493465, EPI_ISL_1493466, EPI_ISL_1493468, EPI_ISL_1493469, EPI_ISL_1493470                                                                                                                                                                                                                                                                                                                   | NJDOH, Public Health and Environmental Laboratories                                                       | NJ_PHEL                                                                                                                           | Lindsay Bodnar, Shiv K. Verma, Dana Woell, Byeong Jeong                                                                                                                                                                                                                                                                                                                                                                                                                                                                                                                                                                                                                                                                  |
| EPI_ISL_1493497, EPI_ISL_1493507, EPI_ISL_1493526, EPI_ISL_1493544, EPI_ISL_1493559, EPI_ISL_1493562, EPI_ISL_1493563, EPI_ISL_1493565, EPI_ISL_1493569, EPI_ISL_1493570                                                                                                                                                                                                                                                                | Aegis Sciences Corporation                                                                                | Centers for Disease Control and Prevention Division of Viral Diseases, Pathogen Discovery                                         | Dakota Howard, Dhvani Batra, Peter W. Cook, Kara Moser, Adrian Paskey, Jason Caravas, Benjamin Rambo-Martin, Shatavia Morrison, Christopher Gulvick, Scott Sammons, Yvette Unoarumhi, Darlene Wagner, Matthew Schmeier, Cyndi Clark, Patrick Campbell, Rob Case, Vikramsinha Ghorpade, Holy Houdeshell, Ola Kvalvaag, Dillon Nall, Ethan Sanders, Alec Vest, Shaun Westlund, Matthew Hardison, Clinton R. Paden, Duncan MacCannell                                                                                                                                                                                                                                                                                       |
| EPI_ISL_1493609, EPI_ISL_1493620, EPI_ISL_1493623, EPI_ISL_1493640, EPI_ISL_1493641, EPI_ISL_1493654, EPI_ISL_1493696                                                                                                                                                                                                                                                                                                                   | Quest Diagnostics Incorporated                                                                            | Centers for Disease Control and Prevention Division of Viral Diseases, Pathogen Discovery                                         | Dakota Howard, Dhvani Batra, Peter W. Cook, Kara Moser, Adrian Paskey, Jason Caravas, Benjamin Rambo-Martin, Shatavia Morrison, Christopher Gulvick, Scott Sammons, Yvette Unoarumhi, Darlene Wagner, Matthew Schmeier, S. H. Rosenthal, A. Gerasimova, R. M. Kagan, B. Anderson, M. Hua, Y. Liu, L.E. Bernstein, K.E. Livingston, A. Perez, I. A. Shlyakhter, R. V. Rolando, R. Owen, P. Tanpaiboon, F. Lacbawan, Clinton R. Paden, Duncan MacCannell                                                                                                                                                                                                                                                                   |
| EPI_ISL_1493799, EPI_ISL_1493860, EPI_ISL_1493897                                                                                                                                                                                                                                                                                                                                                                                       | Helix/Illumina                                                                                            | Centers for Disease Control and Prevention Division of Viral Diseases, Pathogen Discovery                                         | Dakota Howard, Dhvani Batra, Peter W. Cook, Kara Moser, Adrian Paskey, Jason Caravas, Benjamin Rambo-Martin, Shatavia Morrison, Christopher Gulvick, Scott Sammons, Yvette Unoarumhi, Darlene Wagner, Matthew Schmeier, Eileen de Feo, Jan Antico, Christine Tran, Matthew Tolentino, Shannon Wickline, Kim Gietzen, Brad Sickler, Jingtao Liu, Eric Allen, Phil Febbo, Nicole L. Washington, Simon White, Geraint Levan, Kelly Schiabor Barrett, Elizabeth Cirulli, Alexandre Bolze, Ary Ascencio, Charlotte Rivera-Garcia, Ryan Cho, Jason Nguyen, Sherry Wang, Jimmy Ramirez, Tyler Cassens, Eifren Sandoval, Magnus Isaksson, William Lee, David Becker, Marc Laurent, James Lu, Clinton R. Paden, Duncan MacCannell |
| EPI_ISL_1493951, EPI_ISL_1493961, EPI_ISL_1493973, EPI_ISL_1493985, EPI_ISL_1493989, EPI_ISL_1493992, EPI_ISL_1493994, EPI_ISL_1493995, EPI_ISL_1493996, EPI_ISL_1493997, EPI_ISL_1494001, EPI_ISL_1494002, EPI_ISL_1494005, EPI_ISL_1494007, EPI_ISL_1494008, EPI_ISL_1494012, EPI_ISL_1494017, EPI_ISL_1494022, EPI_ISL_1494023, EPI_ISL_1494024, EPI_ISL_1494025, EPI_ISL_1494026, EPI_ISL_1494027, EPI_ISL_1494029, EPI_ISL_1494030 | see above                                                                                                 | Centers for Disease Control and Prevention Division of Viral Diseases, Pathogen Discovery                                         | Peter W. Cook, Dakota Howard, Dhvani Batra, Ben L. Rambo-Martin, S. H. Rosenthal, A. Gerasimova, R. M. Kagan, B. Anderson, M. Hua, Y. Liu, L.E. Bernstein, K.E. Livingston, A. Perez, I. A. Shlyakhter, R. V. Rolando, R. Owen, P. Tanpaiboon, F. Lacbawan, Clinton R. Paden, Suxiang Tong, Duncan MacCannell                                                                                                                                                                                                                                                                                                                                                                                                            |
| EPI_ISL_1494707                                                                                                                                                                                                                                                                                                                                                                                                                         | Laboratorio Aziendale di Microbiologia e Virologia, Azienda Sanitaria dell'Alto Adige                     | Laboratorio Aziendale di Microbiologia e Virologia, Azienda Sanitaria dell'Alto Adige                                             | Irene Bianconi, Bartolomeo Mobilio Rodriguez, Elisabetta Giacobazzi, Elisa Masi, Stefanie Wieser, Anne Picard, Claudia Volpato, Chiara Cantaloni, Elisabetta Pagani                                                                                                                                                                                                                                                                                                                                                                                                                                                                                                                                                      |
| EPI_ISL_1494757, EPI_ISL_1494760,                                                                                                                                                                                                                                                                                                                                                                                                       | Centro Hospitalar de Entre o Douro e Vouga (CHEDV)                                                        | Institute of Biomedicine (IBIMED), Universidade de Aveiro                                                                         | Gabriela Moura, Sofia Marques, Patricia Arinto, Miguel Pinheiro and Manuel Santos                                                                                                                                                                                                                                                                                                                                                                                                                                                                                                                                                                                                                                        |

|                                                                                                                                                                                                                                                               |                                                                                  |                                                                                                                                                             |                                                                                                                                                                                                                                                                                                                                                                                                                                                                                  |
|---------------------------------------------------------------------------------------------------------------------------------------------------------------------------------------------------------------------------------------------------------------|----------------------------------------------------------------------------------|-------------------------------------------------------------------------------------------------------------------------------------------------------------|----------------------------------------------------------------------------------------------------------------------------------------------------------------------------------------------------------------------------------------------------------------------------------------------------------------------------------------------------------------------------------------------------------------------------------------------------------------------------------|
| EPI_ISL_1494761, EPI_ISL_1494763, EPI_ISL_1494764, EPI_ISL_1494767, EPI_ISL_1494772                                                                                                                                                                           |                                                                                  |                                                                                                                                                             |                                                                                                                                                                                                                                                                                                                                                                                                                                                                                  |
| EPI_ISL_1494817                                                                                                                                                                                                                                               | Centro Hospitalar do Baixo Vouga (CHBV)                                          | Institute of Biomedicine (IBiMED), Universidade de Aveiro                                                                                                   | Gabriela Moura, Sofia Marques, Patricia Arinto, Miguel Pinheiro and Manuel Santos                                                                                                                                                                                                                                                                                                                                                                                                |
| EPI_ISL_1494979                                                                                                                                                                                                                                               | Laboratório de Biologia Integrativa                                              | Laboratório de Biologia Integrativa                                                                                                                         | Filipe Romero Rebello Moreira, Diego Menezes Bonfim, Victor Emmanuel Viana Geddes, Danielle Alves Gomes Zauli, Joice do Prado Silva, Aline Brito de Lima, Frederico Scott Varella Malta, Alessandro Clayton de Souza Ferreira, Victor Cavalcanti Pardini, Daniel Costa Queiroz, Rafael Marques de Souza, Lucylene Miguita Luiz, Paula Luize Camargos Fonseca, Rennan Garcias Moreira, Nuno Rodrigues Faria, Carolina Moreira Voloch, Renan Pedra de Souza, Renato Santana Aguiar |
| EPI_ISL_1495117, EPI_ISL_1495119, EPI_ISL_1495120, EPI_ISL_1495124, EPI_ISL_1495125, EPI_ISL_1495130, EPI_ISL_1495133, EPI_ISL_1495134, EPI_ISL_1495137, EPI_ISL_1495140                                                                                      | State Institution «Public Health Center of Ministry of Health of Ukraine»        | Robert Koch Institute, ZBS1 Highly Pathogenic Viruses, Berlin, Germany                                                                                      | Annika Brinkmann, Steven Uddin, Roman Rodyna, Liudmyla Chernenko, Janine Michel, Andreas Nitsche, Iryna Demchyshyna                                                                                                                                                                                                                                                                                                                                                              |
| EPI_ISL_1495221, EPI_ISL_1495238, EPI_ISL_1495242, EPI_ISL_1495243, EPI_ISL_1495263, EPI_ISL_1495264, EPI_ISL_1495266                                                                                                                                         | Public Health Authority of the Slovak Republic                                   | Bergthaler laboratory, CeMM Research Center for Molecular Medicine of the Austrian Academy of Sciences                                                      | Lukas Endler, Anna Schedl, Fabian Amman, Petr Triska, Thomas Penz, Benedikt Agerer, Maelle Le Moing, Michael Schuster, Bekir Erguner, Jan Laine, Martin Senekowitsch, Christoph Bock, Andreas Bergthaler                                                                                                                                                                                                                                                                         |
| EPI_ISL_1495374, EPI_ISL_1495375                                                                                                                                                                                                                              | Department of Microbiology, University Innsbruck                                 | Bergthaler laboratory, CeMM Research Center for Molecular Medicine of the Austrian Academy of Sciences                                                      | Lukas Endler, Anna Schedl, Fabian Amman, Petr Triska, Thomas Penz, Benedikt Agerer, Maelle Le Moing, Michael Schuster, Bekir Erguner, Jan Laine, Martin Senekowitsch, Christoph Bock, Andreas Bergthaler                                                                                                                                                                                                                                                                         |
| EPI_ISL_1495410, EPI_ISL_1495422, EPI_ISL_1495434                                                                                                                                                                                                             | Austrian Agency for Health and Food Safety (AGES)                                | Bergthaler laboratory, CeMM Research Center for Molecular Medicine of the Austrian Academy of Sciences                                                      | Lukas Endler, Anna Schedl, Fabian Amman, Petr Triska, Thomas Penz, Benedikt Agerer, Maelle Le Moing, Michael Schuster, Bekir Erguner, Jan Laine, Martin Senekowitsch, Christoph Bock, Andreas Bergthaler                                                                                                                                                                                                                                                                         |
| EPI_ISL_1495604, EPI_ISL_1495605, EPI_ISL_1495609                                                                                                                                                                                                             | Department of Microbiology, University Innsbruck                                 | Bergthaler laboratory, CeMM Research Center for Molecular Medicine of the Austrian Academy of Sciences                                                      | Lukas Endler, Anna Schedl, Fabian Amman, Petr Triska, Thomas Penz, Benedikt Agerer, Maelle Le Moing, Michael Schuster, Bekir Erguner, Jan Laine, Martin Senekowitsch, Christoph Bock, Andreas Bergthaler                                                                                                                                                                                                                                                                         |
| EPI_ISL_1495694, EPI_ISL_1495707                                                                                                                                                                                                                              | Austrian Agency for Health and Food Safety (AGES)                                | Bergthaler laboratory, CeMM Research Center for Molecular Medicine of the Austrian Academy of Sciences                                                      | Lukas Endler, Anna Schedl, Fabian Amman, Petr Triska, Thomas Penz, Benedikt Agerer, Maelle Le Moing, Michael Schuster, Bekir Erguner, Jan Laine, Martin Senekowitsch, Christoph Bock, Andreas Bergthaler                                                                                                                                                                                                                                                                         |
| EPI_ISL_1495730, EPI_ISL_1495739                                                                                                                                                                                                                              | Elling group, Institute of Molecular Biotechnology (IMBA)                        | Bergthaler laboratory, CeMM Research Center for Molecular Medicine of the Austrian Academy of Sciences                                                      | Lukas Endler, Anna Schedl, Fabian Amman, Petr Triska, Thomas Penz, Benedikt Agerer, Maelle Le Moing, Michael Schuster, Bekir Erguner, Jan Laine, Martin Senekowitsch, Christoph Bock, Andreas Bergthaler                                                                                                                                                                                                                                                                         |
| EPI_ISL_1495767, EPI_ISL_1495777, EPI_ISL_1495799                                                                                                                                                                                                             | Klinikum Wels-Grieskirchen                                                       | Bergthaler laboratory, CeMM Research Center for Molecular Medicine of the Austrian Academy of Sciences                                                      | Lukas Endler, Anna Schedl, Fabian Amman, Petr Triska, Thomas Penz, Benedikt Agerer, Maelle Le Moing, Michael Schuster, Bekir Erguner, Jan Laine, Martin Senekowitsch, Christoph Bock, Andreas Bergthaler                                                                                                                                                                                                                                                                         |
| EPI_ISL_1495868                                                                                                                                                                                                                                               | Institute for Water Quality and Resource Management, Technical University Vienna | Bergthaler laboratory, CeMM Research Center for Molecular Medicine of the Austrian Academy of Sciences                                                      | Lukas Endler, Anna Schedl, Fabian Amman, Petr Triska, Thomas Penz, Benedikt Agerer, Maelle Le Moing, Michael Schuster, Bekir Erguner, Jan Laine, Martin Senekowitsch, Christoph Bock, Andreas Bergthaler                                                                                                                                                                                                                                                                         |
| EPI_ISL_1496188, EPI_ISL_1496207                                                                                                                                                                                                                              | Viollier AG                                                                      | Department of Biosystems Science and Engineering, ETH Zürich                                                                                                | Chaoran Chen, Sarah Nadeau, Ivan Topolsky, Emmanouil Dermizakis, Keith Harshman, Ioannis Xenarios, Henri Pegeot, Lorenzo Cerutti, Deborah Penet, Philipp Jablonski, Lara Fuhrmann, David Dreifuss, Katharina Jahn, Christiane Beckmann, Maurice Redondo, Olivier Kobel, Christoph Noppen, Sophie Seidel, Noemie Santamaria de Souza, Niko Beerenwinkel, Tanja Stadler                                                                                                            |
| EPI_ISL_1496753, EPI_ISL_1496790, EPI_ISL_1496869, EPI_ISL_1496887, EPI_ISL_1496907, EPI_ISL_1496914, EPI_ISL_1496940, EPI_ISL_1497037, EPI_ISL_1497053, EPI_ISL_1497056, EPI_ISL_1497057, EPI_ISL_1497062, EPI_ISL_1497063, EPI_ISL_1497075, EPI_ISL_1497093 | see above                                                                        | Department of Virology and Immunology, University of Helsinki and Helsinki University Hospital, HUSLAB Finland                                              | Teemu Smura, Ravi Kant, Phuoc Truong, Hussein Alburkat, Hannimari Kallio-Kokko, Jenni Virtanen, Maija Suvanto, Essi Korhonen, Sari Hannula, Harri Kangas, Hanna Liimatainen, Satu Kurkela, Hanna Jarva, Maija Lappalainen, Pekka Ellonen, Olli Vapalahti                                                                                                                                                                                                                         |
| EPI_ISL_1497303, EPI_ISL_1497327, EPI_ISL_1497328, EPI_ISL_1497347, EPI_ISL_1497350, EPI_ISL_1497355, EPI_ISL_1497392, EPI_ISL_1497436, EPI_ISL_1497439, EPI_ISL_1497459, EPI_ISL_1497467, EPI_ISL_1497474                                                    | see above                                                                        | National Public Health Organization                                                                                                                         | Kyriaki Tryfinopoulou et al                                                                                                                                                                                                                                                                                                                                                                                                                                                      |
| EPI_ISL_1497531                                                                                                                                                                                                                                               | USC Clinical Lab                                                                 | Los Angeles County PHL                                                                                                                                      | P. Hemarajata et al.                                                                                                                                                                                                                                                                                                                                                                                                                                                             |
| EPI_ISL_1497616                                                                                                                                                                                                                                               | State Veterinary Institute Prague                                                | State Veterinary Institute Prague                                                                                                                           | Nagy,A;Cernikova,L;Stara,M                                                                                                                                                                                                                                                                                                                                                                                                                                                       |
| EPI_ISL_1497681, EPI_ISL_1497682, EPI_ISL_1497739                                                                                                                                                                                                             | 1. Główny Inspektorat Sanitarny. 2. Diagnostyka. Laboratoria Medyczne.           | 1. ViroGenetics - BSL3 Laboratory of Virology, Maopolska Centre of Biotechnology, Jagiellonian University; 2. genXone SA, Research & Development Laboratory | Mazur-Panasiuk,N., Grzegorz Nowicki, Gromowski,T., Natalia Drweska-Matelska, Jakub Grabowski, Anna Brylak, Aleksandra Gidlewicz, Karol Szeszko, Maciej Sykulski, ukasz Krych, Kowalski,M., Szulc,P., Sylwia Januszczak, Labaj,P.P., Micha Kaszuba, Pyrc,K.                                                                                                                                                                                                                       |
| EPI_ISL_1497935                                                                                                                                                                                                                                               | UW Virology Lab                                                                  | UW Virology Lab                                                                                                                                             | Pavitra Roychoudhury, Hong Xie, Lasata Shrestha, Shah Mohamed Bakhsh, Michelle Lin, Noah R. Baker, Sean Ellis, Saraswathi Sathees, Meei-Li Huang, Keith R Jerome, Alexander Greninger                                                                                                                                                                                                                                                                                            |
| EPI_ISL_1498132                                                                                                                                                                                                                                               | Institute for Developing Science and Health Initiatives (ideSHI)                 | Institute for Developing Science and Health Initiatives (ideSHI)                                                                                            | Hassan Afrad, Sadia Rahman, Fidausi Qadri, Tahmina Shirin                                                                                                                                                                                                                                                                                                                                                                                                                        |
| EPI_ISL_1498142                                                                                                                                                                                                                                               | Institute of Epidemiology, Disease Control and Research (IEDCR)                  | Institute for Developing Science and Health Initiatives (ideSHI)                                                                                            | Hassan Afrad, Sadia Rahman, Fidausi Qadri, Tahmina Shirin                                                                                                                                                                                                                                                                                                                                                                                                                        |
| EPI_ISL_1498354                                                                                                                                                                                                                                               | Platform BIS UZA/UAntwerpen                                                      | Labo Klinische Biologie, UZA                                                                                                                                | Jasmine Coppens, Marie Le Mercier, Basil Britto Xavier, Christine Lammens, Veerle Matheussen, Herman Goossens                                                                                                                                                                                                                                                                                                                                                                    |
| EPI_ISL_1498395, EPI_ISL_1498434, EPI_ISL_1498464, EPI_ISL_1498564, EPI_ISL_1498597                                                                                                                                                                           | BioneXt Lab                                                                      | Laboratoire national de sante, Microbiology, Microbial Genomics Platform                                                                                    | Anke Wienecke-Baldacchino, Catherine Ragimbeau,Jessica Tapp, Fatu Djabi, Lise Pignon, Raoul Salmon, Thibault Ferrandon, Tamir Abdelrahman                                                                                                                                                                                                                                                                                                                                        |
| EPI_ISL_1498832, EPI_ISL_1498834, EPI_ISL_1498837, EPI_ISL_1498850, EPI_ISL_1498888, EPI_ISL_1498903, EPI_ISL_1498915                                                                                                                                         | National Institute of Public Health                                              | National Institute of Public Health                                                                                                                         | Helena Jirincova, Jaromira Vecerova, Timotej Suri, Dusan Trnka, Alexander Nagy                                                                                                                                                                                                                                                                                                                                                                                                   |
| EPI_ISL_1499121, EPI_ISL_1499187, EPI_ISL_1499253, EPI_ISL_1499255, EPI_ISL_1499306, EPI_ISL_1499358                                                                                                                                                          | 1. Główny Inspektorat Sanitarny. 2. Diagnostyka. Laboratoria Medyczne.           | 1. ViroGenetics - BSL3 Laboratory of Virology, Maopolska Centre of Biotechnology, Jagiellonian University; 2. genXone SA, Research & Development Laboratory | Mazur-Panasiuk,N., Grzegorz Nowicki, Gromowski,T., Natalia Drweska-Matelska, Jakub Grabowski, Anna Brylak, Aleksandra Gidlewicz, Karol Szeszko, Maciej Sykulski, ukasz Krych, Kowalski,M., Szulc,P., Sylwia Januszczak, Labaj,P.P., Micha Kaszuba, Pyrc,K.                                                                                                                                                                                                                       |
| EPI_ISL_1499531                                                                                                                                                                                                                                               | Institute of Public Health of Dubrovnik-Neretva County                           | Croatian Institute of Public Health                                                                                                                         | Irena Tabain, Ivana Ferenak                                                                                                                                                                                                                                                                                                                                                                                                                                                      |
| EPI_ISL_1499555                                                                                                                                                                                                                                               | Institute of Public Health of Koprivnica-Križevci County                         | Croatian Institute of Public Health                                                                                                                         | Irena Tabain, Ivana Ferenak                                                                                                                                                                                                                                                                                                                                                                                                                                                      |
| EPI_ISL_1499563                                                                                                                                                                                                                                               | Institute of Public Health of Krapina-Zagorje County                             | Croatian Institute of Public Health                                                                                                                         | Irena Tabain, Ivana Ferenak                                                                                                                                                                                                                                                                                                                                                                                                                                                      |
| EPI_ISL_1499583                                                                                                                                                                                                                                               | unknown                                                                          | Instituto Nacional de Saude (INSA)                                                                                                                          | Borges et al                                                                                                                                                                                                                                                                                                                                                                                                                                                                     |
| EPI_ISL_1500077                                                                                                                                                                                                                                               | National Virus Reference Laboratory                                              | National Virus Reference Laboratory                                                                                                                         | Zoe Yandle, Charlene Bennet, Gabriel Gonzalez, Michael Carr, Jonathan Dean, Cillian F De Gascun                                                                                                                                                                                                                                                                                                                                                                                  |
| EPI_ISL_1500088, EPI_ISL_1500098, EPI_ISL_1500099, EPI_ISL_1500102, EPI_ISL_1500110, EPI_ISL_1500122, EPI_ISL_1500133                                                                                                                                         | 1. Główny Inspektorat Sanitarny. 2. Diagnostyka. Laboratoria Medyczne.           | 1. ViroGenetics - BSL3 Laboratory of Virology, Maopolska Centre of Biotechnology, Jagiellonian University; 2. genXone SA, Research & Development Laboratory | Mazur-Panasiuk,N., Grzegorz Nowicki, Gromowski,T., Natalia Drweska-Matelska, Jakub Grabowski, Anna Brylak, Aleksandra Gidlewicz, Karol Szeszko, Maciej Sykulski, ukasz Krych, Kowalski,M., Szulc,P., Sylwia Januszczak, Labaj,P.P., Micha Kaszuba, Pyrc,K.                                                                                                                                                                                                                       |
| EPI_ISL_1500204                                                                                                                                                                                                                                               | Illinois Department of Public Health - Springfield Lab                           | Illinois Department of Public Health - Springfield Lab                                                                                                      | Bryan Sim, Gordon McCall                                                                                                                                                                                                                                                                                                                                                                                                                                                         |
| EPI_ISL_1500267, EPI_ISL_1500315                                                                                                                                                                                                                              | Maryland Genomics, Institute for Genome Sciences.                                | Maryland Genomics, Institute for Genome Sciences,                                                                                                           | Tallon, Luke J; Sadzewicz, Lisa D; Humphrys, Mike; Ott, Sandra; Roussey, Holly; Mehta, Aditya; Vavikolanu, Kranthi; Fraser, Claire M; Ravel, Jacques                                                                                                                                                                                                                                                                                                                             |

|                                                                                                                                                                                                                                                                                                                                                                                                                                                                                                                                                                                                                                                                                                                                                                                                                                                                                                                     |                                                                                                                                                             |                                                                                                                                                             |                                                                                                                                                                                                                                                                                                                                                                                                                             |
|---------------------------------------------------------------------------------------------------------------------------------------------------------------------------------------------------------------------------------------------------------------------------------------------------------------------------------------------------------------------------------------------------------------------------------------------------------------------------------------------------------------------------------------------------------------------------------------------------------------------------------------------------------------------------------------------------------------------------------------------------------------------------------------------------------------------------------------------------------------------------------------------------------------------|-------------------------------------------------------------------------------------------------------------------------------------------------------------|-------------------------------------------------------------------------------------------------------------------------------------------------------------|-----------------------------------------------------------------------------------------------------------------------------------------------------------------------------------------------------------------------------------------------------------------------------------------------------------------------------------------------------------------------------------------------------------------------------|
| EPI_ISL_1500440, EPI_ISL_1500441                                                                                                                                                                                                                                                                                                                                                                                                                                                                                                                                                                                                                                                                                                                                                                                                                                                                                    | University of Maryland School of Medicine<br>Laboratory of Clinical Microbiology, Virology and Bioemergencies, ASST Fatebenefratelli Sacco - Sacco Hospital | University of Maryland School of Medicine<br>Laboratory of Clinical Microbiology, Virology and Bioemergencies, ASST Fatebenefratelli Sacco - Sacco Hospital | Valeria Micheli, Alessandro Mancon, Alberto Rizzo, Fiorenza Bracchitta, Luca Rizzuto, Maria Rita Gismondo                                                                                                                                                                                                                                                                                                                   |
| EPI_ISL_1500948                                                                                                                                                                                                                                                                                                                                                                                                                                                                                                                                                                                                                                                                                                                                                                                                                                                                                                     | Institut National d'Hygiène (INH)                                                                                                                           | Unité Mixte Internationale TransVIHMI (UMI 233 IRD - U1175 INSERM - Université de Montpellier)IRD (Institut de recherche pour le développement)             | Mounerou SALOU, Christelle BUTEL, Wembo A. HALATOKO, Issaka Maman, Abia A. KONOU, Amivi EHLAN, Adodo SADJI, Kokou TEGUENI, Sidonie A.M.KAGNISSODE, Akoélé SILIADIN, Alassane OURO-MEDELI, Messanh DOUFFAN, Déléma MABA, Sika DOSSIM, Améyo DORKENOO, Mireille PRINCE-DAVID, Anoumou DAGNRA, Laetitia SERRANO, Ahidjo AYOUBA, Eric DELAPORTE, Martine PEETERS                                                                |
| EPI_ISL_1501012, EPI_ISL_1501022, EPI_ISL_1501073, EPI_ISL_1501107, EPI_ISL_1501121                                                                                                                                                                                                                                                                                                                                                                                                                                                                                                                                                                                                                                                                                                                                                                                                                                 | HEGP - Laboratoire de Virologie                                                                                                                             | HEGP - Laboratoire de Virologie                                                                                                                             | David Veyer                                                                                                                                                                                                                                                                                                                                                                                                                 |
| EPI_ISL_1501331, EPI_ISL_1501341, EPI_ISL_1501635                                                                                                                                                                                                                                                                                                                                                                                                                                                                                                                                                                                                                                                                                                                                                                                                                                                                   | Public Health Ontario Laboratory                                                                                                                            | Public Health Ontario Laboratory                                                                                                                            | Vanessa G Allen, Philip Banh, Yao Chen, Richard de Borja, Alireza Eshaghi, Nahuel Fittipaldi, Christine Frantz, Jonathan B Gubbay, Jennifer L Guthrie, Lawrence Heisler, Esha Joshi, Michael Laszloffy, Aimin Li, Michael CY Li, Dean Maxwell, Sandeep Nagra, Samir N Patel, Jared Simpson, Karthikeyan Sivaraman, Ashleigh Sullivan, Yogi Sundaravadanam, Sarah Teatero, Andre Villegas, Matthew Watson, Sandra Zittermann |
| EPI_ISL_1502036                                                                                                                                                                                                                                                                                                                                                                                                                                                                                                                                                                                                                                                                                                                                                                                                                                                                                                     | Lurie Children's Hospital of Chicago                                                                                                                        | Northwestern University - Ozer Lab                                                                                                                          | Ramon Lorenzo-Redondo, Lacy M. Simons, Taylor J. Dean, Michael G. Ison, Xiaotian, Zheng, William J. Muller, Larry K. Kocielek, Judd F. Hultquist, Egon A. Ozer                                                                                                                                                                                                                                                              |
| EPI_ISL_1502072                                                                                                                                                                                                                                                                                                                                                                                                                                                                                                                                                                                                                                                                                                                                                                                                                                                                                                     | Northwestern Memorial Hospital                                                                                                                              | Northwestern University - Ozer Lab                                                                                                                          | Ramon Lorenzo-Redondo, Lacy M. Simons, Taylor J. Dean, Chad J. Achenbach, Lawrence J. Jennings, Chao Qi, Michael G. Ison, Judd F. Hultquist, Egon A. Ozer                                                                                                                                                                                                                                                                   |
| EPI_ISL_1502112                                                                                                                                                                                                                                                                                                                                                                                                                                                                                                                                                                                                                                                                                                                                                                                                                                                                                                     | Laboratoire Biolim/FSS/UL                                                                                                                                   | Unité Mixte Internationale TransVIHMI (UMI 233 IRD - U1175 INSERM - Université de Montpellier)IRD (Institut de recherche pour le développement)             | Mounerou SALOU, Christelle BUTEL, Wembo A. HALATOKO, Amivi EHLAN, Abia A. KONOU, Issaka Maman, Syntiche DEVATCHAGNI Adodo SADJI, Kokou TEGUENI, Koku AGBODEKA, Sidonie A.M.KAGNISSODE, Akoélé SILIADIN, Alassane OURO-MEDELI, Messanh DOUFFAN, Déléma MABA, Sika DOSSIM, Améyo DORKENOO, Mireille PRINCE-DAVID, Anoumou DAGNRA, Laetitia SERRANO, Ahidjo AYOUBA, Eric DELAPORTE, Martine PEETERS                            |
| EPI_ISL_1502552                                                                                                                                                                                                                                                                                                                                                                                                                                                                                                                                                                                                                                                                                                                                                                                                                                                                                                     | OSPEDALE SAN SALVATORE - MEDICINA DI LABORATORIO L'AQUILA(L'AQUILA)                                                                                         | Istituto Zooprofilattico Sperimentale dell'Abruzzo e Molise "G. Caporale"                                                                                   | Lorusso A, Marccacci M, Di Domenico M, Ancora M, Curini V, Di Lollo Valeria, Mangone I, Rinaldi A, Delili Compagni E, Scialabba S, Caporale M, Di Pasquale A, Cammà C, Puglia I, Calistri P, Savini G<br>Nasereddin, A., Ereqat, S., Al-Jawabreh, A., Dumaidi, K.                                                                                                                                                           |
| EPI_ISL_1502568, EPI_ISL_1502569, EPI_ISL_1502570, EPI_ISL_1502571, EPI_ISL_1502573, EPI_ISL_1502574, EPI_ISL_1502577, EPI_ISL_1502578, EPI_ISL_1502579                                                                                                                                                                                                                                                                                                                                                                                                                                                                                                                                                                                                                                                                                                                                                             | Biochemistry and Molecular Biology Department-Faculty of Medicine, Al-Quds University                                                                       | Biochemistry and Molecular Biology Department-Faculty of Medicine, Al-Quds University                                                                       |                                                                                                                                                                                                                                                                                                                                                                                                                             |
| EPI_ISL_1502750, EPI_ISL_1502756, EPI_ISL_1502778                                                                                                                                                                                                                                                                                                                                                                                                                                                                                                                                                                                                                                                                                                                                                                                                                                                                   | 1. Główny Inspektorat Sanitarny. 2. Diagnostyka. Laboratoria Medyczne.                                                                                      | 1. ViroGenetics - BSL3 Laboratory of Virology, Maopolska Centre of Biotechnology, Jagiellonian University; 2. genXone SA, Research & Development Laboratory | Mazur-Panasiuk, N., Grzegorz Nowicki, Gromowski, T., Natalia Drwesa-Matelska, Jakub Grabowski, Anna Brylak, Aleksandra Gidlewicz, Karol Szeszko, Maciej Sykulski, ukasz Krych, Kowalski, M., Szulc, P., Sylwia Januszczak, Labaj, P. P., Micha Kaszuba, Pyrc, K.                                                                                                                                                            |
| EPI_ISL_1502798                                                                                                                                                                                                                                                                                                                                                                                                                                                                                                                                                                                                                                                                                                                                                                                                                                                                                                     | Kansas Health and Environmental Lab                                                                                                                         | Kansas Health and Environmental Lab                                                                                                                         | Mike Grose, Jonathan Barnell, Ben Olsen, and Phil Adam                                                                                                                                                                                                                                                                                                                                                                      |
| EPI_ISL_1503149, EPI_ISL_1503156, EPI_ISL_1503163, EPI_ISL_1503172, EPI_ISL_1503180, EPI_ISL_1503211, EPI_ISL_1503219                                                                                                                                                                                                                                                                                                                                                                                                                                                                                                                                                                                                                                                                                                                                                                                               | National Public Health Organization                                                                                                                         | National Public Health Organization                                                                                                                         | Kyriaki Tryfinopoulou et al                                                                                                                                                                                                                                                                                                                                                                                                 |
| EPI_ISL_1503236                                                                                                                                                                                                                                                                                                                                                                                                                                                                                                                                                                                                                                                                                                                                                                                                                                                                                                     | Wichita State University - Molecular Diagnostics Lab                                                                                                        | Kansas Health and Environmental Lab                                                                                                                         | Mike Grose, Jonathan Barnell, Ben Olsen, and Phil Adam                                                                                                                                                                                                                                                                                                                                                                      |
| EPI_ISL_1503478, EPI_ISL_1503524, EPI_ISL_1503538, EPI_ISL_1503622, EPI_ISL_1503656, EPI_ISL_1503659, EPI_ISL_1503691, EPI_ISL_1503765, EPI_ISL_1503773                                                                                                                                                                                                                                                                                                                                                                                                                                                                                                                                                                                                                                                                                                                                                             | Massachusetts State Public Health Laboratory                                                                                                                | Massachusetts State Public Health Laboratory                                                                                                                | Andrew Lang, Timelia Fink, Glen Gallagher, Sandra Smole                                                                                                                                                                                                                                                                                                                                                                     |
| EPI_ISL_1503794                                                                                                                                                                                                                                                                                                                                                                                                                                                                                                                                                                                                                                                                                                                                                                                                                                                                                                     | Nebraska Public Health Laboratory                                                                                                                           | NPHL COVID-19 Response Team                                                                                                                                 | NPHL COVID-19 Response Team                                                                                                                                                                                                                                                                                                                                                                                                 |
| EPI_ISL_1503828, EPI_ISL_1503841, EPI_ISL_1503842, EPI_ISL_1503919                                                                                                                                                                                                                                                                                                                                                                                                                                                                                                                                                                                                                                                                                                                                                                                                                                                  | Microbiology Department, Laboratori Clinic Metropolitana Nord. Hospital Universitari Germans Trias i Pujol.                                                 | Can Ruti SARS-CoV-2 Sequencing Hub (HUGTIP/IrsiCaixa/IGTP)                                                                                                  | Marc Noguera-Julian, Pilar Armengol, Ignacio Blanco, Antoni E Bordoy, Francesc Catala-Moll, Pere-Joan Cardona, Maria Casadellà, Cristina Casañ, Gemma Clara, Bonaventura Clotet, Cristina Esteban, Montserrat Giménez, Mercedes Guerrero, Anna Not, Roger Paredes, Mariona Parera, Verónica Saludes, Alba Sánchez, and Elisa Martró on behalf of the Can Ruti SARS-CoV-2 Sequencing Hub.                                    |
| EPI_ISL_1503968                                                                                                                                                                                                                                                                                                                                                                                                                                                                                                                                                                                                                                                                                                                                                                                                                                                                                                     | Emory Molecular Diagnostics Laboratory, Emory Healthcare                                                                                                    | Piantadosi Lab, Emory Department of Pathology                                                                                                               | Ahmed Babiker, Anne Piantadosi                                                                                                                                                                                                                                                                                                                                                                                              |
| EPI_ISL_1503990                                                                                                                                                                                                                                                                                                                                                                                                                                                                                                                                                                                                                                                                                                                                                                                                                                                                                                     | USC Clinical Lab                                                                                                                                            | Los Angeles County PHL                                                                                                                                      | P. Hemarajata et al.                                                                                                                                                                                                                                                                                                                                                                                                        |
| EPI_ISL_1504532                                                                                                                                                                                                                                                                                                                                                                                                                                                                                                                                                                                                                                                                                                                                                                                                                                                                                                     | Lighthouse Lab in Glasgow                                                                                                                                   | Wellcome Sanger Institute for the COVID-19 Genomics UK (COG-UK) Consortium                                                                                  | Harper VanSteenhouse, Yumi Kasai, David Gray, Carol Clugston, Anna Dominiczak and Alex Alderton, Roberto Amato, Jeffrey Barrett, Sonia Goncalves, Ewan Harrison, David K. Jackson, Ian Johnston, Dominic Kwiatkowski, Cordelia Langford, John Sillitoe on behalf of the Wellcome Sanger Institute COVID-19 Surveillance Team                                                                                                |
| EPI_ISL_1504590                                                                                                                                                                                                                                                                                                                                                                                                                                                                                                                                                                                                                                                                                                                                                                                                                                                                                                     | Lighthouse Lab in Cambridge                                                                                                                                 | Wellcome Sanger Institute for the COVID-19 Genomics UK (COG-UK) Consortium                                                                                  | Rob Howes, The Lighthouse Lab in Cambridge and Alex Alderton, Roberto Amato, Jeffrey Barrett, Sonia Goncalves, Ewan Harrison, David K. Jackson, Ian Johnston, Dominic Kwiatkowski, Cordelia Langford, John Sillitoe on behalf of the Wellcome Sanger Institute COVID-19 Surveillance Team                                                                                                                                   |
| EPI_ISL_1504817                                                                                                                                                                                                                                                                                                                                                                                                                                                                                                                                                                                                                                                                                                                                                                                                                                                                                                     | Randox Laboratories                                                                                                                                         | Wellcome Sanger Institute for the COVID-19 Genomics UK (COG-UK) Consortium                                                                                  | Randox Laboratories and Alex Alderton, Roberto Amato, Jeffrey Barrett, Sonia Goncalves, Ewan Harrison, David K. Jackson, Ian Johnston, Dominic Kwiatkowski, Cordelia Langford, John Sillitoe on behalf of the Wellcome Sanger Institute COVID-19 Surveillance Team                                                                                                                                                          |
| EPI_ISL_1505069                                                                                                                                                                                                                                                                                                                                                                                                                                                                                                                                                                                                                                                                                                                                                                                                                                                                                                     | Lighthouse Lab in Glasgow                                                                                                                                   | Wellcome Sanger Institute for the COVID-19 Genomics UK (COG-UK) Consortium                                                                                  | Harper VanSteenhouse, Yumi Kasai, David Gray, Carol Clugston, Anna Dominiczak and Alex Alderton, Roberto Amato, Jeffrey Barrett, Sonia Goncalves, Ewan Harrison, David K. Jackson, Ian Johnston, Dominic Kwiatkowski, Cordelia Langford, John Sillitoe on behalf of the Wellcome Sanger Institute COVID-19 Surveillance Team                                                                                                |
| EPI_ISL_1505604                                                                                                                                                                                                                                                                                                                                                                                                                                                                                                                                                                                                                                                                                                                                                                                                                                                                                                     | Lighthouse Lab in Alderley Park                                                                                                                             | Wellcome Sanger Institute for the COVID-19 Genomics UK (COG-UK) Consortium                                                                                  | Jacquelyn Wynn, Mairead Hyland, The Lighthouse Lab in Alderley Park and Alex Alderton, Roberto Amato, Jeffrey Barrett, Sonia Goncalves, Ewan Harrison, David K. Jackson, Ian Johnston, Dominic Kwiatkowski, Cordelia Langford, John Sillitoe on behalf of the Wellcome Sanger Institute COVID-19 Surveillance Team                                                                                                          |
| EPI_ISL_1508845                                                                                                                                                                                                                                                                                                                                                                                                                                                                                                                                                                                                                                                                                                                                                                                                                                                                                                     | Medical Genetics Laboratory, Regional Centre of Medical Genetics, Emergency County Hospital Craiova                                                         | Medical Genetics Laboratory, Regional Centre of Medical Genetics, Emergency County Hospital Craiova                                                         | Anca-Lelia (Riza) Costache, Ioana Streata, Stefania Dorobantu, Adina Dragos, Mihai Cucu, Ana-Maria Buga, Razvan Plesea, Andrei Pirvu, Elena Plesea, Monica Cara, Mihai Ioana                                                                                                                                                                                                                                                |
| EPI_ISL_1508895                                                                                                                                                                                                                                                                                                                                                                                                                                                                                                                                                                                                                                                                                                                                                                                                                                                                                                     | Laboratory for HIV and opportunistic infections diagnosis The Republican Research and Practical Center for Epidemiology and Microbiology (RRPCEM)           | Laboratory for HIV and opportunistic infections diagnosis The Republican Research and Practical Center for Epidemiology and Microbiology (RRPCEM)           | Elena Gasich, Kirill Bulda, Yauhen Sysaliatsin, Leonid Valentovich, Alina Drozd, Nastassia Kabankova, Anatoly Krasko, Vladimir Gorbunov, Alena Mikhailenka, Alexander Kilchevcky                                                                                                                                                                                                                                            |
| EPI_ISL_1508919                                                                                                                                                                                                                                                                                                                                                                                                                                                                                                                                                                                                                                                                                                                                                                                                                                                                                                     | USC Clinical Lab                                                                                                                                            | Los Angeles County PHL                                                                                                                                      | P. Hemarajata et al.                                                                                                                                                                                                                                                                                                                                                                                                        |
| EPI_ISL_1508946                                                                                                                                                                                                                                                                                                                                                                                                                                                                                                                                                                                                                                                                                                                                                                                                                                                                                                     | National Institute of Laboratory Medicine and Referral Center                                                                                               | Genomic Research Lab, BCSIR                                                                                                                                 | Md. Murshed Hasan Sarkar, Shahina Akter, Abu Sayeed Mohammad Mahmud, Mohammad Samir Uzzaman, Eshrar Osman, Md. Ahasan Habib, Tanjina Akhter Banu, Barna Goswami, Ifat Jahan, Md. Saddam Hossain, Tasnim Nafisa, Md. Maruf Ahmed Molla, Mahmuda Yeasmin, Asish Kumar Ghosh, Arifa Akram, A. K. M. Shamsuzzaman, Md. Salim Khan                                                                                               |
| EPI_ISL_1508975                                                                                                                                                                                                                                                                                                                                                                                                                                                                                                                                                                                                                                                                                                                                                                                                                                                                                                     | Kaiser Santa Clara                                                                                                                                          | Santa Clara County Public Health Laboratory                                                                                                                 | Santa Clara County Public Health Department                                                                                                                                                                                                                                                                                                                                                                                 |
| EPI_ISL_1509103, EPI_ISL_1509104, EPI_ISL_1509108, EPI_ISL_1509111, EPI_ISL_1509112, EPI_ISL_1509119, EPI_ISL_1509120, EPI_ISL_1509121, EPI_ISL_1509124, EPI_ISL_1509125, EPI_ISL_1509129, EPI_ISL_1509131, EPI_ISL_1509133, EPI_ISL_1509136, EPI_ISL_1509137, EPI_ISL_1509138, EPI_ISL_1509141, EPI_ISL_1509142, EPI_ISL_1509145, EPI_ISL_1509157, EPI_ISL_1509158, EPI_ISL_1509161, EPI_ISL_1509164, EPI_ISL_1509165, EPI_ISL_1509169, EPI_ISL_1509170, EPI_ISL_1509171, EPI_ISL_1509173, EPI_ISL_1509177, EPI_ISL_1509178, EPI_ISL_1509185, EPI_ISL_1509191, EPI_ISL_1509193, EPI_ISL_1509194, EPI_ISL_1509196, EPI_ISL_1509207, EPI_ISL_1509208, EPI_ISL_1509213, EPI_ISL_1509214, EPI_ISL_1509216, EPI_ISL_1509217, EPI_ISL_1509218, EPI_ISL_1509220, EPI_ISL_1509221, EPI_ISL_1509222, EPI_ISL_1509228, EPI_ISL_1509229, EPI_ISL_1509231, EPI_ISL_1509237, EPI_ISL_1509244, EPI_ISL_1509245, EPI_ISL_1509246, |                                                                                                                                                             |                                                                                                                                                             |                                                                                                                                                                                                                                                                                                                                                                                                                             |

|                                                                                                                                                                                           |           |                                                                                                                                                                                                                |                                                                                                                                   |                                                                                                                                                                                                                                                                                                                                                                                                                                                                                                                     |
|-------------------------------------------------------------------------------------------------------------------------------------------------------------------------------------------|-----------|----------------------------------------------------------------------------------------------------------------------------------------------------------------------------------------------------------------|-----------------------------------------------------------------------------------------------------------------------------------|---------------------------------------------------------------------------------------------------------------------------------------------------------------------------------------------------------------------------------------------------------------------------------------------------------------------------------------------------------------------------------------------------------------------------------------------------------------------------------------------------------------------|
| EPI_ISL_1509247, EPI_ISL_1509250, EPI_ISL_1509251, EPI_ISL_1509252, EPI_ISL_1509256, EPI_ISL_1509257, EPI_ISL_1509259, EPI_ISL_1509260                                                    | see above | Yale Clinical Virology Lab                                                                                                                                                                                     | Grubaugh Lab - Yale School of Public Health                                                                                       | Joseph Fauver, Mallery Breban, Isabell Ott, Tara Alpert, Mary Petrone, Anderson Brito, Chantal Vogels, Annie Watkins, Chaney Kalinich, Jessica Rothman, Marie L. Landry, Nathan Grubaugh                                                                                                                                                                                                                                                                                                                            |
| EPI_ISL_1509269                                                                                                                                                                           |           | Murphy Medical Association                                                                                                                                                                                     | Grubaugh Lab - Yale School of Public Health                                                                                       | Joseph Fauver, Mallery Breban, Isabel Ott, Tara Alpert, Mary Petrone, Anderson Brito, Chantal Vogels, Annie Watkins, Chaney Kalinich, Jessica Rothman, Caleb Neal, Eva Laszlo, Steven Murphy, Nathan Grubaugh                                                                                                                                                                                                                                                                                                       |
| EPI_ISL_1509270                                                                                                                                                                           |           | Grubaugh Lab - Yale School of Public Health                                                                                                                                                                    | Grubaugh Lab - Yale School of Public Health                                                                                       | Joseph Fauver, Mallery Breban, Isabell Ott, Tara Alpert, Mary Petrone, Anderson Brito, Chantal Vogels, Annie Watkins, Chaney Kalinich, Jessica Rothman, Nathan Grubaugh                                                                                                                                                                                                                                                                                                                                             |
| EPI_ISL_1509363, EPI_ISL_1509393, EPI_ISL_1509408, EPI_ISL_1509409, EPI_ISL_1509463, EPI_ISL_1509537, EPI_ISL_1509575                                                                     |           | IZSM                                                                                                                                                                                                           | TIGEM                                                                                                                             | Antonio Grimaldi Patrizia Annunziata Francesco Panariello Biancamaria Pierri Claudia Tiberio Valentina Bouche Chiara Colantuono Maria Concetta Cuomo Denise Di Concilio Lucio Di Filippo Anna Manfredi Marcello Salvi Antonio Limone Luigi Atripaldi Pellegrino Cerino Andrea Ballabio Davide Cacchiarelli                                                                                                                                                                                                          |
| EPI_ISL_1509757                                                                                                                                                                           |           | SC (UCO) Igiene e Sanità Pubblica (funzione integrata con SC Microbiologia e Virologia) e Az. Ospedaliero-Universitaria Udine                                                                                  | ARGO Laboratorio Genomica ed Epigenomica                                                                                          | Licastro D, Dal Monego S, Degasperis M, Marcello A, Segat L, Piscianz E, D'Agaro P                                                                                                                                                                                                                                                                                                                                                                                                                                  |
| EPI_ISL_1509777, EPI_ISL_1509785, EPI_ISL_1509788, EPI_ISL_1509806, EPI_ISL_1509811, EPI_ISL_1509854, EPI_ISL_1509867, EPI_ISL_1509875, EPI_ISL_1509876, EPI_ISL_1509878                  |           | National Center of Infectious and Parasitic Diseases                                                                                                                                                           | National Center of Infectious and Parasitic Diseases                                                                              | Alexiev, Ivanov, Korsun, Stoitsova, Philipova, Dimitrova, Grigorova L., Hristova, Donchev, Stoykov, Trifonova, Dobrinov, Grigorova I., Kantardjiev                                                                                                                                                                                                                                                                                                                                                                  |
| EPI_ISL_1509932                                                                                                                                                                           |           | LA Office of Public Health Laboratories                                                                                                                                                                        | Genomics and Discovery, Respiratory Viruses Branch, Division of Viral Diseases, Centers for Disease Control and Prevention        | Yan Li, Ying Tao, Jing Zhang, Brian Lynch, Anna Kelleher, Anna Montmayeur, Krista Queen, Anna Uehara, Peter Cook, Rachel Marine, Mark Burroughs, Han Jia Justin Ng, Clinton R. Paden, Haibin Wang, Justin Lee, Adam Retchless, Suxiang Tong                                                                                                                                                                                                                                                                         |
| EPI_ISL_1509981                                                                                                                                                                           |           | HOSPITAL UNIVERSITARIO VIRGEN DE LA ARRIXACA                                                                                                                                                                   | Instituto de Salud Carlos III                                                                                                     | Vázquez-Morón,S. Iglesias-Caballero, M. Sardonis,V. Camarero, S. Pozo, F. Casas, I. Jiménez, P. Zaballos, A. Monzón, S. Varona, S. Cuesta, I.MORENO PARRADO, LAURA                                                                                                                                                                                                                                                                                                                                                  |
| EPI_ISL_1510295, EPI_ISL_1510309, EPI_ISL_1510312, EPI_ISL_1510314, EPI_ISL_1510318, EPI_ISL_1510321, EPI_ISL_1510323, EPI_ISL_1510353, EPI_ISL_1510400, EPI_ISL_1510402                  |           | National Institute of Public Health                                                                                                                                                                            | State Veterinary Institute Prague                                                                                                 | Nagy,A;Jirincova,H;Suri,T;Trnka,D;Vecerova,J                                                                                                                                                                                                                                                                                                                                                                                                                                                                        |
| EPI_ISL_1510442                                                                                                                                                                           |           | SC (UCO) Igiene e Sanità Pubblica (funzione integrata con SC Microbiologia e Virologia)                                                                                                                        | ARGO Laboratorio Genomica ed Epigenomica                                                                                          | Licastro D, Dal Monego S, Degasperis M, Marcello A, D'Agaro P, De Rosa R                                                                                                                                                                                                                                                                                                                                                                                                                                            |
| EPI_ISL_1510582                                                                                                                                                                           |           | Università di Parma, Laboratorio di Igiene e Sanità Pubblica                                                                                                                                                   | Istituto Zooprofilattico Sperimentale della Lombardia e dell'Emilia Romagna (IZSLER), Risk Analysis and Genomic Epidemiology Unit | Maria Eugenia Colucci, Licia Veronesi, Paola Affanni, Marina Morganti, Ilaria Menozzi, Erika Scaltriti, Stefano Pongolini                                                                                                                                                                                                                                                                                                                                                                                           |
| EPI_ISL_1510610, EPI_ISL_1510611, EPI_ISL_1510612, EPI_ISL_1510614, EPI_ISL_1510615, EPI_ISL_1510616, EPI_ISL_1510619                                                                     |           | Molecular diagnostic laboratory of Federal Budget Institution of Science "Central Research Institute of Epidemiology" of The Federal Service on Customers' Rights Protection and Human Well-being Surveillance | Group of Genomics and Postgenomic Technologies of Central Research Institute of Epidemiology                                      | Samoilov AE, Kaptelova VV, Korneenko EV, Valdokhina AV, Bulanenko VP, Saenko SS, Golubeva AG, Zotova MI, Berlina YY, Solovyeva ED, Cherkashina AS, Shipulina OY, Speranskaya AS, Tivanova EV, Kondrasheva LY, Akimkin VG                                                                                                                                                                                                                                                                                            |
| EPI_ISL_1510725                                                                                                                                                                           |           | HOSPITAL UNIVERSITARIO DE CANARIAS(GESTION ECONOMICA)                                                                                                                                                          | Instituto de Salud Carlos III                                                                                                     | Sardonis,V. Vázquez-Morón, S. Iglesias-Caballero, M. Camarero, S. Pozo, F. Casas, I. Jiménez, P. Zaballos, A. Monzón, S. Varona, S. Cuesta, I. CASTRO HERNANDEZ, BEATRIZ                                                                                                                                                                                                                                                                                                                                            |
| EPI_ISL_1511124, EPI_ISL_1511137                                                                                                                                                          |           | Institute for Urban Disease Control and Prevention                                                                                                                                                             | COVID-19 Network Investigations (CONI) Alliance                                                                                   | Elizabeth Batty, Wasun Chantraita, Thanat Chookajorn, Stefan Fernandez, Angkana Huang, Anthony R. Jones, Khajohn Joonlasak, Chonticha Klungtong, Theerarat Kochakarn, Namfon Kotanan, Krittikorn Kumpornsin, Duangkamon Loesbanluechai, Wudtichai Manasatienkij, Bhakbhoom Panthan, Ekawat Pasomsub, Kingkan Rakmanee, Insee Sensor, Janjira Thaipadungpanit, Arporn Wangwivatsin, Treewat Watthanachockchai, Kamolthip Atsawawanunt, Prayuth Kaewmalang, Amornmas Kongklieng, Pukkaporn Parnwijitkul, Vichan Pawun |
| EPI_ISL_1511257                                                                                                                                                                           |           | Wyoming Public Health Laboratory                                                                                                                                                                               | Wyoming Public Health Laboratory                                                                                                  | Jim Mildenerberger, Wanda Manley, Noah Hull, Taylor Fearing, Lynette Gumbleton, Channing Weber, Ashley Norberg, Chayse Rowley, Marley Goetz, Brian Dominguez, Elliot Thomasson, Cari Sloma, and Rob Christensen                                                                                                                                                                                                                                                                                                     |
| EPI_ISL_1511404, EPI_ISL_1511507, EPI_ISL_1511546, EPI_ISL_1511560, EPI_ISL_1511564                                                                                                       |           | Hospital of the University of Pennsylvania Molecular Pathology Lab                                                                                                                                             | Bushman Lab - University of Pennsylvania                                                                                          | John Everett, Kyle Rodino, Shantan Reddy, Pascha Hokama, Aoife M. Roche, Young Hwang, Abigail Glascock, Scott Sherrill-Mix, Samantha A. Whiteside, Jevon Graham-Wooten, Layla A. Khatib, Ayannah S. Fitzgerald, Arupa Ganguly, Mike Feldman, Brendan Kelly, Ronald G. Collman and Frederic Bushman                                                                                                                                                                                                                  |
| EPI_ISL_1512183                                                                                                                                                                           |           | Oregon State Public Health Laboratory                                                                                                                                                                          | Oregon State Public Health Laboratory                                                                                             | Rafia Razzaque, Eugene Yeboah, Vanda Makris, Laura Tsaknaridis, John Fontana and Shane Sevey                                                                                                                                                                                                                                                                                                                                                                                                                        |
| EPI_ISL_1515771                                                                                                                                                                           |           | Wyoming Public Health Laboratory                                                                                                                                                                               | Wyoming Public Health Laboratory                                                                                                  | Jim Mildenerberger, Wanda Manley, Noah Hull, Taylor Fearing, Lynette Gumbleton, Channing Weber, Ashley Norberg, Chayse Rowley, Marley Goetz, Brian Dominguez, Elliot Thomasson, Cari Sloma, and Rob Christensen                                                                                                                                                                                                                                                                                                     |
| EPI_ISL_1515799                                                                                                                                                                           |           | DC Public Health Lab/ Dept. of Forensic Sciences                                                                                                                                                               | DC Public Health Lab/ Dept. of Forensic Sciences                                                                                  | Janis Doss, Scott Nguyen, Elizabeth Zelaya, Sarah Scott, Connie Maza, Monica Mann, Brittany Hamilton, David Payne, Jocelyn Hauser                                                                                                                                                                                                                                                                                                                                                                                   |
| EPI_ISL_1515812, EPI_ISL_1515860, EPI_ISL_1515964, EPI_ISL_1515971, EPI_ISL_1516001                                                                                                       |           | State Laboratories Division, Hawaii State Department of Health                                                                                                                                                 | State Laboratories Division, Hawaii State Department of Health                                                                    | Pamela O'Brien, Drew Kuwazaki, Ayana Garnet, Razvan Sultana, Edward Desmond                                                                                                                                                                                                                                                                                                                                                                                                                                         |
| EPI_ISL_1516448, EPI_ISL_1516499, EPI_ISL_1516500, EPI_ISL_1516523, EPI_ISL_1516527, EPI_ISL_1516529, EPI_ISL_1516544, EPI_ISL_1516564, EPI_ISL_1516570, EPI_ISL_1516575, EPI_ISL_1516594 |           | see above                                                                                                                                                                                                      | Broad Institute Clinical Research Sequencing Platform                                                                             | Infectious Disease Program, Broad Institute of Harvard and MIT                                                                                                                                                                                                                                                                                                                                                                                                                                                      |
| EPI_ISL_1516909                                                                                                                                                                           |           | Hospital                                                                                                                                                                                                       | National Reference Center for Viruses of Respiratory Infections, Institut Pasteur, Paris                                          | Siddle,K.J., Adams,G., Pearlman,L., Gladden-Young,A., Vicente,G., Blumenstiel,B., DeFelice,M., Lee,M., McGovern,S., Lagerborg,K., Rudy,M., DeRuff,K., Carter,A., Normandin,E., Bauer,M., Reilly,S., Tomkins-Tinch,C., Loreth,C., Chaluvadi,S., Meldrim,J., Granger,B., Lemieux,J.E., Birren,B.W., Sabeti,P.C., Larkin,K., Dodge,S., Lennon,N., Madoff,L., Brown,C., Gallagher,G., Smole,S., Park,D.J., Gabriel,S., and MacInnis,B.L.                                                                                |
| EPI_ISL_1517014                                                                                                                                                                           |           | Hospital                                                                                                                                                                                                       | National Reference Center for Viruses of Respiratory Infections, Institut Pasteur, Paris                                          | Marion Barbet, Sylvie Behillil, Méline Bizard, Angela Brisebarre, Camille Capel,Frédéric Lemoine,Corinne Maufrais,Christophe Malabat, Louise Lefrançois, Etienne Simon-Lorière, Vincent Enouf, Maud Vanpeene, Sylvie van der Werf,Dominique Descamps                                                                                                                                                                                                                                                                |
| EPI_ISL_1517136                                                                                                                                                                           |           | Hospital                                                                                                                                                                                                       | National Reference Center for Viruses of Respiratory Infections, Institut Pasteur, Paris                                          | Marion Barbet, Sylvie Behillil, Méline Bizard, Angela Brisebarre, Camille Capel,Frédéric Lemoine,Corinne Maufrais,Christophe Malabat, Louise Lefrançois, Etienne Simon-Lorière, Vincent Enouf, Maud Vanpeene, Sylvie van der Werf,Adeline Baron                                                                                                                                                                                                                                                                     |
| EPI_ISL_1517238, EPI_ISL_1517243, EPI_ISL_1517245                                                                                                                                         |           | Labo Analyses Med                                                                                                                                                                                              | National Reference Center for Viruses of Respiratory Infections, Institut Pasteur, Paris                                          | Marion Barbet, Sylvie Behillil, Méline Bizard, Angela Brisebarre, Camille Capel,Frédéric Lemoine,Corinne Maufrais,Christophe Malabat, Louise Lefrançois, Etienne Simon-Lorière, Vincent Enouf, Maud Vanpeene, Sylvie van der Werf,Nabil Gastli                                                                                                                                                                                                                                                                      |
| EPI_ISL_1517300                                                                                                                                                                           |           | CHUV                                                                                                                                                                                                           | Laboratory of genomics and metagenomics                                                                                           | Trestan Pilonel, Damien Jacot, SĀ@bastien Aeby, Gilbert Greub, Claire Bertelli                                                                                                                                                                                                                                                                                                                                                                                                                                      |
| EPI_ISL_1517434                                                                                                                                                                           |           | Inciensa, Instituto Costarricense de Investigación y Enseñanza en Nutrición y Salud                                                                                                                            | Inciensa, Instituto Costarricense de Investigación y Enseñanza en Nutrición y Salud                                               | Cristian Pérez-Corrales, Barboza-Arguedas E & Jimenez-Mora A                                                                                                                                                                                                                                                                                                                                                                                                                                                        |
| EPI_ISL_1517472, EPI_ISL_1517476                                                                                                                                                          |           | Hospital                                                                                                                                                                                                       | National Reference Center for Viruses of Respiratory Infections, Institut Pasteur, Paris                                          | Marion Barbet, Sylvie Behillil, Méline Bizard, Angela Brisebarre, Camille Capel,Frédéric Lemoine,Corinne Maufrais,Christophe Malabat, Louise Lefrançois, Etienne Simon-Lorière, Vincent Enouf, Maud Vanpeene, Sylvie van der Werf,Nabil Gastli                                                                                                                                                                                                                                                                      |

|                                                                                                                                                                                                                                                                                |                                                                                      |                                                                                        |                                                                                                                                                                                                                                                                                                                                                                                                                                                 |
|--------------------------------------------------------------------------------------------------------------------------------------------------------------------------------------------------------------------------------------------------------------------------------|--------------------------------------------------------------------------------------|----------------------------------------------------------------------------------------|-------------------------------------------------------------------------------------------------------------------------------------------------------------------------------------------------------------------------------------------------------------------------------------------------------------------------------------------------------------------------------------------------------------------------------------------------|
| EPI_ISL_1517587, EPI_ISL_1517663                                                                                                                                                                                                                                               | Lighthouse Lab in Glasgow                                                            | Wellcome Sanger Institute for the COVID-19 Genomics UK (COG-UK) Consortium             | Harper VanSteenhouse, Yumi Kasai, David Gray, Carol Clugston, Anna Dominiczak and Alex Alderton, Roberto Amato, Jeffrey Barrett, Sonia Goncalves, Ewan Harrison, David K. Jackson, Ian Johnston, Dominic Kwiatkowski, Cordelia Langford, John Sillitoe on behalf of the Wellcome Sanger Institute COVID-19 Surveillance Team                                                                                                                    |
| EPI_ISL_1517883, EPI_ISL_1518497                                                                                                                                                                                                                                               | Lighthouse Lab in Alderley Park                                                      | Wellcome Sanger Institute for the COVID-19 Genomics UK (COG-UK) Consortium             | Jacquelyn Wynn, Mairead Hyland, The Lighthouse Lab in Alderley Park and Alex Alderton, Roberto Amato, Jeffrey Barrett, Sonia Goncalves, Ewan Harrison, David K. Jackson, Ian Johnston, Dominic Kwiatkowski, Cordelia Langford, John Sillitoe on behalf of the Wellcome Sanger Institute COVID-19 Surveillance Team                                                                                                                              |
| EPI_ISL_1518542                                                                                                                                                                                                                                                                | Lighthouse Lab in Glasgow                                                            | Wellcome Sanger Institute for the COVID-19 Genomics UK (COG-UK) Consortium             | Harper VanSteenhouse, Yumi Kasai, David Gray, Carol Clugston, Anna Dominiczak and Alex Alderton, Roberto Amato, Jeffrey Barrett, Sonia Goncalves, Ewan Harrison, David K. Jackson, Ian Johnston, Dominic Kwiatkowski, Cordelia Langford, John Sillitoe on behalf of the Wellcome Sanger Institute COVID-19 Surveillance Team                                                                                                                    |
| EPI_ISL_1518840, EPI_ISL_1518911                                                                                                                                                                                                                                               | Lighthouse Lab in Alderley Park                                                      | Wellcome Sanger Institute for the COVID-19 Genomics UK (COG-UK) Consortium             | Jacquelyn Wynn, Mairead Hyland, The Lighthouse Lab in Alderley Park and Alex Alderton, Roberto Amato, Jeffrey Barrett, Sonia Goncalves, Ewan Harrison, David K. Jackson, Ian Johnston, Dominic Kwiatkowski, Cordelia Langford, John Sillitoe on behalf of the Wellcome Sanger Institute COVID-19 Surveillance Team                                                                                                                              |
| EPI_ISL_1518995                                                                                                                                                                                                                                                                | Lighthouse Lab in Glasgow                                                            | Wellcome Sanger Institute for the COVID-19 Genomics UK (COG-UK) Consortium             | Harper VanSteenhouse, Yumi Kasai, David Gray, Carol Clugston, Anna Dominiczak and Alex Alderton, Roberto Amato, Jeffrey Barrett, Sonia Goncalves, Ewan Harrison, David K. Jackson, Ian Johnston, Dominic Kwiatkowski, Cordelia Langford, John Sillitoe on behalf of the Wellcome Sanger Institute COVID-19 Surveillance Team                                                                                                                    |
| EPI_ISL_1519035                                                                                                                                                                                                                                                                | Lighthouse Lab in Milton Keynes                                                      | Wellcome Sanger Institute for the COVID-19 Genomics UK (COG-UK) Consortium             | The Lighthouse Lab in Milton Keynes and Alex Alderton, Roberto Amato, Jeffrey Barrett, Sonia Goncalves, Ewan Harrison, David K. Jackson, Ian Johnston, Dominic Kwiatkowski, Cordelia Langford, John Sillitoe on behalf of the Wellcome Sanger Institute COVID-19 Surveillance Team                                                                                                                                                              |
| EPI_ISL_1520150                                                                                                                                                                                                                                                                | Riverside Medical Center                                                             | Illinois Department of Public Health - Chicago Lab                                     | Vineet K. Dhirman, Ira Heimler                                                                                                                                                                                                                                                                                                                                                                                                                  |
| EPI_ISL_1520236, EPI_ISL_1520290, EPI_ISL_1520351                                                                                                                                                                                                                              | Public Health Authority of the Slovak Republic                                       | Laboratory of Genomics and Bioinformatics, Comenius University Science Park            | Tatiana Sedláková, Diana Rusáková, Miroslav Böhmer, Anna Giová, Jaroslav Budiš, Tomáš Szemes                                                                                                                                                                                                                                                                                                                                                    |
| EPI_ISL_1520866, EPI_ISL_1520868, EPI_ISL_1520874, EPI_ISL_1521136, EPI_ISL_1521141, EPI_ISL_1521188, EPI_ISL_1521824, EPI_ISL_1521833, EPI_ISL_1521836                                                                                                                        | Dutch COVID-19 response team                                                         | National Institute for Public Health and the Environment (RIVM)                        | Adam Meijer, Harry Vennema, Dirk Eggink, Jeroen Cremer, Sharon van den Brink, Bas van der Veer, AnneMarie van den Brandt, Lisa Wijsman, Kim Freriks, Ryanne Jaarsma, Eunice Then, Jolienke Hardeman, Lynn Aarts, Sanne Bos, Melissa van Tuil, Robert Kohl, Linda van de Nes, Sjoerd Kuiling, James Groot, Florian Zwagemaker, Dennis Schmitz, Annelies Kroneman, Karim Hajji, Chantal Reusken, on behalf of the national COVID-19 response team |
| EPI_ISL_1522379, EPI_ISL_1522380                                                                                                                                                                                                                                               | Curative                                                                             | New Mexico Department of Health Scientific Laboratory                                  | Ellie Johnson, Anastacia Griego-Fisher, D'eldra Malone, Jennifer Benoit, Linda Salazar, Ratheesh Rajan                                                                                                                                                                                                                                                                                                                                          |
| EPI_ISL_1522624                                                                                                                                                                                                                                                                | Laboratoires d'analyses medicales - Ketterthill                                      | Laboratoire national de sante, Microbiology, Microbial Genomics Platform               | Anke Wienecke-Baldacchino, Catherine Ragimbeau, Jessica Tapp, Fatu Djabi, Lise Pignon, Raoul Salmon, Serge Vedy, Caroline Scheiber, Tamir Abdelrahman                                                                                                                                                                                                                                                                                           |
| EPI_ISL_1522627                                                                                                                                                                                                                                                                | Hôpitaux Robert Schuman                                                              | Laboratoire national de sante, Microbiology, Microbial Genomics Platform               | Anke Wienecke-Baldacchino, Catherine Ragimbeau, Jessica Tapp, Fatu Djabi, Lise Pignon, Raoul Salmon, Alain Hakim, Nawfal Faik, Tamir Abdelrahman                                                                                                                                                                                                                                                                                                |
| EPI_ISL_1522761                                                                                                                                                                                                                                                                | Laboratoires d'analyses medicales - Ketterthill                                      | Laboratoire national de sante, Microbiology, Microbial Genomics Platform               | Anke Wienecke-Baldacchino, Catherine Ragimbeau, Jessica Tapp, Fatu Djabi, Lise Pignon, Raoul Salmon, Serge Vedy, Caroline Scheiber, Tamir Abdelrahman                                                                                                                                                                                                                                                                                           |
| EPI_ISL_1522842                                                                                                                                                                                                                                                                | Centre Hospitalier du Nord                                                           | Laboratoire national de sante, Microbiology, Microbial Genomics Platform               | Anke Wienecke-Baldacchino, Catherine Ragimbeau, Jessica Tapp, Fatu Djabi, Lise Pignon, Raoul Salmon, Fatiha Boulmerka, Tamir Abdelrahman                                                                                                                                                                                                                                                                                                        |
| EPI_ISL_1522852                                                                                                                                                                                                                                                                | Hospital Center Emile Mayrisch                                                       | Laboratoire national de sante, Microbiology, Microbial Genomics Platform               | Anke Wienecke-Baldacchino, Catherine Ragimbeau, Jessica Tapp, Fatu Djabi, Lise Pignon, Raoul Salmon, Cynthia Oxacelay, Tamir Abdelrahman                                                                                                                                                                                                                                                                                                        |
| EPI_ISL_1522913                                                                                                                                                                                                                                                                | Hôpitaux Robert Schuman                                                              | Laboratoire national de sante, Microbiology, Microbial Genomics Platform               | Anke Wienecke-Baldacchino, Catherine Ragimbeau, Jessica Tapp, Fatu Djabi, Lise Pignon, Raoul Salmon, Alain Hakim, Nawfal Faik, Tamir Abdelrahman                                                                                                                                                                                                                                                                                                |
| EPI_ISL_1522983                                                                                                                                                                                                                                                                | Laboratoire national de sante, Microbiology, Virology                                | Laboratoire national de sante, Microbiology, Microbial Genomics Platform               | Anke Wienecke-Baldacchino, Catherine Ragimbeau, Jessica Tapp, Fatu Djabi, Lise Pignon, Raoul Salmon, Trung Nguyen Nguyen, Tamir Abdelrahman                                                                                                                                                                                                                                                                                                     |
| EPI_ISL_1523133                                                                                                                                                                                                                                                                | BioneXt Lab                                                                          | Laboratoire national de sante, Microbiology, Microbial Genomics Platform               | Anke Wienecke-Baldacchino, Catherine Ragimbeau, Jessica Tapp, Fatu Djabi, Lise Pignon, Raoul Salmon, Thibault Ferrandon, Tamir Abdelrahman                                                                                                                                                                                                                                                                                                      |
| EPI_ISL_1523632                                                                                                                                                                                                                                                                | Azienda Sanitaria dell'Alto Adige Laboratorio Aziendale di Microbiologia e Virologia | Istituto di Genomica Applicata                                                         | Elisabetta Pagani, Irene Bianconi, Elisabetta Giacobazzi, Elisa Masi, Stefanie Wieser, Irena Jurman, Vera Vendramin, Gabriele Magris, Eleonora Paparelli, Davide Scaglione, Michele Morgante                                                                                                                                                                                                                                                    |
| EPI_ISL_1523706                                                                                                                                                                                                                                                                | Maine Health and Environmental Testing Laboratory                                    | Tewhey Lab, The Jackson Laboratory                                                     | Matluk, N., Dewey, H., Iosue, F., Barter, M., Lynch, R., Munger, H. and Tewhey, R.                                                                                                                                                                                                                                                                                                                                                              |
| EPI_ISL_1524059, EPI_ISL_1524138, EPI_ISL_1524183                                                                                                                                                                                                                              | Public Health Authority of the Slovak Republic                                       | Laboratory of Genomics and Bioinformatics, Comenius University Science Park            | Tatiana Sedláková, Diana Rusáková, Miroslav Böhmer, Anna Giová, Jaroslav Budiš, Tomáš Szemes                                                                                                                                                                                                                                                                                                                                                    |
| EPI_ISL_1524334, EPI_ISL_1524335, EPI_ISL_1524337, EPI_ISL_1524342, EPI_ISL_1524345, EPI_ISL_1524348, EPI_ISL_1524349, EPI_ISL_1524350, EPI_ISL_1524354, EPI_ISL_1524355, EPI_ISL_1524358, EPI_ISL_1524359, EPI_ISL_1524362, EPI_ISL_1524368, EPI_ISL_1524369, EPI_ISL_1524371 | see above                                                                            | Department of Virology, Faculty of Medicine, University of Helsinki, Helsinki, Finland | Nihad Al-Rashedi, Hussein Alburkat, Murad Munahi, Alaa Hameed, Ali Jasim, Olli Vapalahti, Tarja Sironen, Teemu Smura                                                                                                                                                                                                                                                                                                                            |
| EPI_ISL_1524418                                                                                                                                                                                                                                                                | ULSS 6 Euganea                                                                       | Istituto Zooprofilattico Sperimentale delle Venezie                                    | Adelaide Milani, Alessia Schivo, Annalisa Salviato, Elisa Palumbo, Erika Giorgia Quaranta, Luca Tassoni, Ambra Pastori, Edoardo Giussani, Alice Fusaro, Isabella Monne, Calogero Terregino, Antonia Ricci                                                                                                                                                                                                                                       |
| EPI_ISL_1524431                                                                                                                                                                                                                                                                | ULSS 1 Dolomiti                                                                      | Istituto Zooprofilattico Sperimentale delle Venezie                                    | Adelaide Milani, Alessia Schivo, Annalisa Salviato, Elisa Palumbo, Erika Giorgia Quaranta, Luca Tassoni, Ambra Pastori, Edoardo Giussani, Alice Fusaro, Isabella Monne, Calogero Terregino, Antonia Ricci                                                                                                                                                                                                                                       |
| EPI_ISL_1524450                                                                                                                                                                                                                                                                | ULSS 8 Berica                                                                        | Istituto Zooprofilattico Sperimentale delle Venezie                                    | Adelaide Milani, Alessia Schivo, Annalisa Salviato, Elisa Palumbo, Erika Giorgia Quaranta, Luca Tassoni, Ambra Pastori, Edoardo Giussani, Alice Fusaro, Isabella Monne, Calogero Terregino, Antonia Ricci                                                                                                                                                                                                                                       |
| EPI_ISL_1524453                                                                                                                                                                                                                                                                | ULSS 4 Veneto Orientale                                                              | Istituto Zooprofilattico Sperimentale delle Venezie                                    | Adelaide Milani, Alessia Schivo, Annalisa Salviato, Elisa Palumbo, Erika Giorgia Quaranta, Luca Tassoni, Ambra Pastori, Edoardo Giussani, Alice Fusaro, Isabella Monne, Calogero Terregino, Antonia Ricci                                                                                                                                                                                                                                       |
| EPI_ISL_1524479                                                                                                                                                                                                                                                                | ULSS 1 Dolomiti                                                                      | Istituto di Genomica Applicata; Istituto Zooprofilattico Sperimentale delle Venezie    | Irena Jurman, Vera Vendramin, Gabriele Magris, Eleonora Paparelli, Davide Scaglione, Michele Morgante, Silvia Ormelli, Maria Varotto, Valeria D'Amico, Francesca Bruno, Alessia Schivo, Annalisa Salviato, Erika Giorgia Quaranta, Luca Tassoni, Ambra Pastori, Edoardo Giussani, Alice Fusaro, Isabella Monne, Calogero Terregino, Antonia Ricci                                                                                               |
| EPI_ISL_1524514                                                                                                                                                                                                                                                                | ULSS 7 Pedemontana - Distretto 1                                                     | Istituto di Genomica Applicata; Istituto Zooprofilattico Sperimentale delle Venezie    | Irena Jurman, Vera Vendramin, Gabriele Magris, Eleonora Paparelli, Davide Scaglione, Michele Morgante, Silvia Ormelli, Maria Varotto, Valeria D'Amico, Francesca Bruno, Alessia Schivo, Annalisa Salviato, Erika Giorgia Quaranta, Luca Tassoni, Ambra Pastori, Edoardo Giussani, Alice Fusaro, Isabella Monne, Calogero Terregino, Antonia Ricci                                                                                               |
| EPI_ISL_1524543                                                                                                                                                                                                                                                                | Ospedale Magalini                                                                    | Istituto di Genomica Applicata; Istituto Zooprofilattico Sperimentale delle Venezie    | Irena Jurman, Vera Vendramin, Gabriele Magris, Eleonora Paparelli, Davide Scaglione, Michele Morgante, Silvia Ormelli, Maria Varotto, Valeria D'Amico, Francesca Bruno, Alessia Schivo, Annalisa Salviato, Erika Giorgia Quaranta, Luca Tassoni, Ambra Pastori, Edoardo Giussani, Alice Fusaro, Isabella Monne, Calogero Terregino, Antonia Ricci                                                                                               |
| EPI_ISL_1524583                                                                                                                                                                                                                                                                | ULSS 2 Marca Trevigiana                                                              | Istituto di Genomica Applicata; Istituto Zooprofilattico Sperimentale delle Venezie    | Irena Jurman, Vera Vendramin, Gabriele Magris, Eleonora Paparelli, Davide Scaglione, Michele Morgante, Silvia Ormelli, Maria Varotto, Valeria D'Amico, Francesca Bruno, Alessia Schivo, Annalisa Salviato, Erika Giorgia Quaranta, Luca Tassoni, Ambra Pastori, Edoardo Giussani, Alice Fusaro, Isabella Monne, Calogero Terregino, Antonia Ricci                                                                                               |
| EPI_ISL_1524637, EPI_ISL_1524639,                                                                                                                                                                                                                                              | ULSS 6 Euganea                                                                       | Istituto Zooprofilattico Sperimentale delle Venezie                                    | Adelaide Milani, Alessia Schivo, Annalisa Salviato, Elisa Palumbo, Erika Giorgia Quaranta, Luca Tassoni, Ambra Pastori, Edoardo Giussani, Alice Fusaro,                                                                                                                                                                                                                                                                                         |

|                                                                                                                                                                                                            |                                                                            |                                                                                                                                                             |                                                                                                                                                                                                                                                                                                                                                                                                 |
|------------------------------------------------------------------------------------------------------------------------------------------------------------------------------------------------------------|----------------------------------------------------------------------------|-------------------------------------------------------------------------------------------------------------------------------------------------------------|-------------------------------------------------------------------------------------------------------------------------------------------------------------------------------------------------------------------------------------------------------------------------------------------------------------------------------------------------------------------------------------------------|
| EPI_ISL_1524645                                                                                                                                                                                            |                                                                            |                                                                                                                                                             | Isabella Monne, Calogero Terregino, Antonia Ricci                                                                                                                                                                                                                                                                                                                                               |
| EPI_ISL_1524682                                                                                                                                                                                            | Microbiologia e Virologia                                                  | Istituto Zooprofilattico Sperimentale delle Venezie                                                                                                         | Adelaide Milani, Alessia Schivo, Annalisa Salviato, Elisa Palumbo, Erika Giorgia Quaranta, Luca Tassoni, Ambra Pastori, Edoardo Giussani, Alice Fusaro, Isabella Monne, Calogero Terregino, Antonia Ricci                                                                                                                                                                                       |
| EPI_ISL_1524708                                                                                                                                                                                            | Laboratoire Bioim/FSS/UL                                                   | Unité Mixte Internationale TransVIHMI (UMI 233 IRD - U1175 INSERM - Université de Montpellier) IRD (Institut de recherche pour le développement)            | Mounerou SALOU, Christelle BUTEL, Wembo A. HALATOKO, Amivi EHLAN, Aba A. KONOU, Issaka Maman, Syntyche DEVATCHAGNI, Adodo SADJI, Kokou TEGUENI, Koku AGBODEKA, Sidonie A.M.KAGNISSODE, Akoéié SILIADIN, Alassane OURO-MEDEL, Messanh DOUFFAN, Délima MABA, Sika DOSSIM, Améyo DORKENOO, Mireille PRINCE-DAVID, Anoumou DAGNRA, Laetitia SERRANO, Ahidjo AYOUBA, Eric DELAPORTE, Martine PEETERS |
| EPI_ISL_1524734                                                                                                                                                                                            | Ospedale San Camillo De Lellis di Rieti                                    | INMI Lazzaro Spallanzani IRCCS                                                                                                                              | F Messina, M Rueca, G Bonfiglio, O Butera, CEM Gruber, F Santini, B Bartolini, E Giombini, S Venarubea, A De Luca, L Casertano, A Di Caro, MR Capobianchi                                                                                                                                                                                                                                       |
| EPI_ISL_1524758                                                                                                                                                                                            | 1. Główny Inspektorat Sanitarny. 2. Diagnostyka. Laboratoria Medyczne.     | 1. ViroGenetics - BSL3 Laboratory of Virology, Maopolska Centre of Biotechnology, Jagiellonian University; 2. genXone SA, Research & Development Laboratory | Mazur-Panasiek,N., Grzegorz Nowicki, Gromowski,T., Natalia Drweska-Matelska, Jakub Grabowski, Anna Brylak, Aleksandra Gidlewicz, Karol Szeszko, Maciej Sykulski, ukasz Krych, Kowalski,M., Szulc,P., Sylwia Januszczak, Labaj,P.P., Micha Kaszuba, Pyrc,K.                                                                                                                                      |
| EPI_ISL_1524788                                                                                                                                                                                            | National Public Health Laboratory, National Centre for Infectious Diseases | National Public Health Laboratory, National Centre for Infectious Diseases                                                                                  | Tze Minn Mak, Zhenyang Zhou, Grace Jie Yin Ngan, Royce Ang, Lin Cui, Raymond Tzer Pin Lin                                                                                                                                                                                                                                                                                                       |
| EPI_ISL_1524830, EPI_ISL_1524848                                                                                                                                                                           | Hospital General Universitario Gregorio Marañón                            | Hospital General Universitario Gregorio Marañón                                                                                                             | Sergio Buenestado Serrano, Pedro Sola Campoy, Laura Pérez-Lago, Cristina Rodriguez-Grande, Pilar Catalán, Patricia Muñoz, Dario Garcia de Viedma                                                                                                                                                                                                                                                |
| EPI_ISL_1524862                                                                                                                                                                                            | SIESP DIPARTIMENTO DI PREVENZIONE TERAMO TERAMO(TERAMO)                    | Istituto Zooprofilattico Sperimentale dell'Abruzzo e Molise "G. Caporale"                                                                                   | Lorusso A, Marcacci M, Di Domenico M, Ancora M, Curini V, Di Lollo Valeria, Mangone I, Rinaldi A, Delli Compagni E, Scialabba S, Caporale M, Di Pasquale A, Cammà C, Puglia I, Calistri P, Savini G                                                                                                                                                                                             |
| EPI_ISL_1525012                                                                                                                                                                                            | Indiana State Department of Health                                         | Quantigen Biosciences                                                                                                                                       | Paul J Childress                                                                                                                                                                                                                                                                                                                                                                                |
| EPI_ISL_1526087                                                                                                                                                                                            | CNR Virus des Infections Respiratoires - France SUD                        | CNR Virus des Infections Respiratoires - France SUD                                                                                                         | Antonin Bal, Gregory Destras, Gwendolyn Burfin, Hadrien Regue, Quentin Semanas, Martine Valette, Bruno Lina, Laurence Josset                                                                                                                                                                                                                                                                    |
| EPI_ISL_1526102                                                                                                                                                                                            | CH de GIVORS                                                               | CNR Virus des Infections Respiratoires - France SUD                                                                                                         | Antonin Bal, Gregory Destras, Gwendolyn Burfin, Hadrien Regue, Quentin Semanas, Martine Valette, Bruno Lina, Laurence Josset                                                                                                                                                                                                                                                                    |
| EPI_ISL_1526116, EPI_ISL_1526214, EPI_ISL_1526262                                                                                                                                                          | CNR Virus des Infections Respiratoires - France SUD                        | CNR Virus des Infections Respiratoires - France SUD                                                                                                         | Antonin Bal, Gregory Destras, Gwendolyn Burfin, Hadrien Regue, Quentin Semanas, Martine Valette, Bruno Lina, Laurence Josset                                                                                                                                                                                                                                                                    |
| EPI_ISL_1526295                                                                                                                                                                                            | LBM UNIBIO VALENTIN                                                        | CNR Virus des Infections Respiratoires - France SUD                                                                                                         | Antonin Bal, Gregory Destras, Gwendolyn Burfin, Hadrien Regue, Quentin Semanas, Martine Valette, Bruno Lina, Laurence Josset                                                                                                                                                                                                                                                                    |
| EPI_ISL_1526384, EPI_ISL_1526426, EPI_ISL_1526436, EPI_ISL_1526483, EPI_ISL_1526490, EPI_ISL_1526493, EPI_ISL_1526512, EPI_ISL_1526518, EPI_ISL_1526526                                                    | CNR Virus des Infections Respiratoires - France SUD                        | CNR Virus des Infections Respiratoires - France SUD                                                                                                         | Antonin Bal, Gregory Destras, Gwendolyn Burfin, Hadrien Regue, Quentin Semanas, Martine Valette, Bruno Lina, Laurence Josset                                                                                                                                                                                                                                                                    |
| EPI_ISL_1526661, EPI_ISL_1526663                                                                                                                                                                           | Public Health Authority of the Slovak Republic                             | Laboratory of Genomics and Bioinformatics, Comenius University Science Park                                                                                 | Tatiana Sedláková, Diana Rusáková, Miroslav Böhmer, Anna Giová, Jaroslav Budiš, Tomáš Szemes                                                                                                                                                                                                                                                                                                    |
| EPI_ISL_1526875                                                                                                                                                                                            | Virginia Division of Consolidated Laboratory Services                      | Virginia Division of Consolidated Laboratory Services                                                                                                       | Virginia DCLS                                                                                                                                                                                                                                                                                                                                                                                   |
| EPI_ISL_1527001                                                                                                                                                                                            | Washington State Department of Health Public Health Laboratories           | Washington State Department of Health Public Health Laboratories                                                                                            | Drew MacKellar, Philip Dykema, Denny Russell, Joenice Gonzalez, Hannah Gray, Geoff Melly, Vanessa De Los Santos, Darren Lucas, JohnAric Peterson, Avi Singh, Rebecca Cao                                                                                                                                                                                                                        |
| EPI_ISL_1527030, EPI_ISL_1527049, EPI_ISL_1527064                                                                                                                                                          | University of Mississippi Medical Center, Department of Pathology          | University of Mississippi Medical Center, Molecular and Genomics Core Facility                                                                              | Ashley C. Johnson, Ithiel J. Frame, Krishna K. Ayyalasomayajula, Michael R. Garrett, D. Ashley Robinson                                                                                                                                                                                                                                                                                         |
| EPI_ISL_1527203                                                                                                                                                                                            | Massachusetts State Public Health Laboratory                               | Massachusetts State Public Health Laboratory                                                                                                                | Andrew Lang, Timelia Fink, Glen Gallagher, Sandra Smole                                                                                                                                                                                                                                                                                                                                         |
| EPI_ISL_1527252, EPI_ISL_1527258                                                                                                                                                                           | University of Mississippi Medical Center, Department of Pathology          | University of Mississippi Medical Center, Molecular and Genomics Core Facility                                                                              | Ashley C. Johnson, Ithiel J. Frame, Krishna K. Ayyalasomayajula, Michael R. Garrett, D. Ashley Robinson                                                                                                                                                                                                                                                                                         |
| EPI_ISL_1527269, EPI_ISL_1527323                                                                                                                                                                           | Washington State Department of Health Public Health Laboratories           | Washington State Department of Health Public Health Laboratories                                                                                            | Drew MacKellar, Philip Dykema, Denny Russell, Joenice Gonzalez, Hannah Gray, Geoff Melly, Vanessa De Los Santos, Darren Lucas, JohnAric Peterson, Avi Singh, Rebecca Cao                                                                                                                                                                                                                        |
| EPI_ISL_1527421, EPI_ISL_1527439                                                                                                                                                                           | University of Mississippi Medical Center, Department of Pathology          | University of Mississippi Medical Center, Molecular and Genomics Core Facility                                                                              | Ashley C. Johnson, Ithiel J. Frame, Krishna K. Ayyalasomayajula, Michael R. Garrett, D. Ashley Robinson                                                                                                                                                                                                                                                                                         |
| EPI_ISL_1527567                                                                                                                                                                                            | TXDSHS                                                                     | TXDSHS                                                                                                                                                      | Rashmi Tuladhar, Bonnie Oh, Jenny Zhang, Maliha Rahman, Mayela Pedrueza, Anita Pokharel, Lorraine Rodriguez, Myong Koag, Chun Wang, Rachel Lee, Grace Kubin                                                                                                                                                                                                                                     |
| EPI_ISL_1527712, EPI_ISL_1528084                                                                                                                                                                           | Michigan Department of Health and Human Services, Bureau of Laboratories   | Michigan Department of Health and Human Services, Bureau of Laboratories                                                                                    | Blankenship HM, Riner D, Soehnlen MK                                                                                                                                                                                                                                                                                                                                                            |
| EPI_ISL_1528192                                                                                                                                                                                            | Hospital                                                                   | National Reference Center for Viruses of Respiratory Infections, Institut Pasteur, Paris                                                                    | Marion Barbet, Sylvie Behillil, Frédéric Lemoine, Corinne Maufrais, Christophe Malabat, Emmanuelle Permal, Méline Bizard, Angela Brisebarre, Camille Capel, Louise Lefrançois, Etienne Simon-Lorière, Vincent Enouf, Maud Vanpeene, Sylvie van der Werf, Françoise Lunel Fabiani                                                                                                                |
| EPI_ISL_1528198                                                                                                                                                                                            | Hospital                                                                   | National Reference Center for Viruses of Respiratory Infections, Institut Pasteur, Paris                                                                    | Marion Barbet, Sylvie Behillil, Frédéric Lemoine, Corinne Maufrais, Christophe Malabat, Méline Bizard, Angela Brisebarre, Camille Capel, Louise Lefrançois, Etienne Simon-Lorière, Vincent Enouf, Maud Vanpeene, Sylvie van der Werf, H Bisiau                                                                                                                                                  |
| EPI_ISL_1528210                                                                                                                                                                                            | Hospital                                                                   | National Reference Center for Viruses of Respiratory Infections, Institut Pasteur, Paris                                                                    | Marion Barbet, Sylvie Behillil, Frédéric Lemoine, Corinne Maufrais, Christophe Malabat, Adrien Pain, Méline Bizard, Angela Brisebarre, Camille Capel, Louise Lefrançois, Etienne Simon-Lorière, Vincent Enouf, Maud Vanpeene, Sylvie van der Werf, Valérie Serazin                                                                                                                              |
| EPI_ISL_1528212, EPI_ISL_1528213                                                                                                                                                                           | Labo Analyses Med                                                          | National Reference Center for Viruses of Respiratory Infections, Institut Pasteur, Paris                                                                    | Marion Barbet, Sylvie Behillil, Frédéric Lemoine, Corinne Maufrais, Christophe Malabat, Méline Bizard, Angela Brisebarre, Camille Capel, Louise Lefrançois, Etienne Simon-Lorière, Vincent Enouf, Maud Vanpeene, Sylvie van der Werf, Pierre-Yves Leonard                                                                                                                                       |
| EPI_ISL_1528604                                                                                                                                                                                            | Wheeling Hospital                                                          | WVU and Marshall University Combined Genomics Core Facilities                                                                                               | "James Denvir, Peter Stoilov, Peter Perrotta, Wesley Kimble, Ryan Percifield"                                                                                                                                                                                                                                                                                                                   |
| EPI_ISL_1529000                                                                                                                                                                                            | NA                                                                         | WVU and Marshall University Combined Genomics Core Facilities                                                                                               | "James Denvir, Peter Stoilov, Peter Perrotta, Wesley Kimble, Ryan Percifield"                                                                                                                                                                                                                                                                                                                   |
| EPI_ISL_1529129                                                                                                                                                                                            | County of San Luis Obispo Public Health Laboratory                         | Chan-Zuckerberg Biohub                                                                                                                                      | CZB Cliahub Consortium                                                                                                                                                                                                                                                                                                                                                                          |
| EPI_ISL_1530614                                                                                                                                                                                            | Sonora Quest Laboratories                                                  | TGen North                                                                                                                                                  | Jolene Bowers, Heather Centner, Chris French, Hayley Yaglom, Ashlyn Pfeiffer, Darrin Lemmer, Dave Engelthaler, The Arizona COVID Genomics Union (ACGU)                                                                                                                                                                                                                                          |
| EPI_ISL_1530853                                                                                                                                                                                            | TGen North                                                                 | TGen North                                                                                                                                                  | Jolene Bowers, Heather Centner, Chris French, Hayley Yaglom, Ashlyn Pfeiffer, Darrin Lemmer, Dave Engelthaler, The Arizona COVID Genomics Union (ACGU)                                                                                                                                                                                                                                          |
| EPI_ISL_1530878, EPI_ISL_1530884, EPI_ISL_1530885, EPI_ISL_1530899, EPI_ISL_1530901, EPI_ISL_1530911, EPI_ISL_1530918, EPI_ISL_1530919, EPI_ISL_1530921, EPI_ISL_1530927, EPI_ISL_1530934, EPI_ISL_1530941 | see above                                                                  | New Jersey Public Health and Environmental Laboratories (NJPHL)                                                                                             | Lindsey Bodnar, Shiv K. Verma, Jacquelyn Deverell, Matthew Scarnati, Mohammad M Ali, Dana Woell, Byeong Jeong                                                                                                                                                                                                                                                                                   |
| EPI_ISL_1531163, EPI_ISL_1531204                                                                                                                                                                           | Florida Bureau of Public Health Laboratories                               | Florida Bureau of Public Health Laboratories                                                                                                                | Sarah Schmedes, Jason Blanton                                                                                                                                                                                                                                                                                                                                                                   |
| EPI_ISL_1531475, EPI_ISL_1531527, EPI_ISL_1531528                                                                                                                                                          | US Air Force School of Aerospace Medicine                                  | US Air Force School of Aerospace Medicine                                                                                                                   | Anthony Fries, Jennifer Meyer, William Gruner, William Buggele, Amanda Javorina, Sarah Purves, Clarise Starr, Elizabeth Macias                                                                                                                                                                                                                                                                  |
| EPI_ISL_1531571                                                                                                                                                                                            | National Institute of Laboratory Medicine and Referral Center              | Genomic Research Lab, BCSIR                                                                                                                                 | Md. Saddam Hossain, Md. Murshed Hasan Sarkar, Abu Sayeed Mohammad Mahmud, Mohammad Samir Uzzaman, Eshrar Osman, Md. Ahasan Habib,                                                                                                                                                                                                                                                               |



|                                                                                                      |                                                                                                     |                                                                                                                     |                                                                                                                                                                                                                                                                                                                                                                                                                                                                                                                        |
|------------------------------------------------------------------------------------------------------|-----------------------------------------------------------------------------------------------------|---------------------------------------------------------------------------------------------------------------------|------------------------------------------------------------------------------------------------------------------------------------------------------------------------------------------------------------------------------------------------------------------------------------------------------------------------------------------------------------------------------------------------------------------------------------------------------------------------------------------------------------------------|
| EPI_ISL_1531785, EPI_ISL_1531794                                                                     | Sharp HealthCare Laboratory                                                                         | Andersen lab at Scripps Research                                                                                    | SEARCH Alliance San Diego with Aaron Harding, Jacquelyn Berumen, Cathy Woerle, Liam McGinnis, Art Mendoza, Omid Bakhtar                                                                                                                                                                                                                                                                                                                                                                                                |
| EPI_ISL_1532733, EPI_ISL_1532742, EPI_ISL_1532745, EPI_ISL_1532748, EPI_ISL_1532752, EPI_ISL_1532767 | NYU Langone Health                                                                                  | Departments of Pathology and Medicine, New York University School of Medicine                                       | Adriana Heguy, Dacia Dimartino, Emily Guzman, Christian Marier, Peter Meyn, Sitharam Ramaswami, Gael Westby, Paul Zappile, Yutong Zhang, Paolo Cotzia, Guiqing Wang                                                                                                                                                                                                                                                                                                                                                    |
| EPI_ISL_1532800                                                                                      | Cambodian National Public Health Laboratory, National Institute of Public Health                    | Virology Unit, Institut Pasteur du Cambodge                                                                         | Sokhoun Yann, Teypoutita Ou, Leakhena Pum, Ly Sovann, Kraing Sidonn, Yi Sengdoeurn, Chin Savuth, Chau Darapheak, Veasna Duong, Erik A Karlsson                                                                                                                                                                                                                                                                                                                                                                         |
| EPI_ISL_1532814                                                                                      | Virology Unit, Institut Pasteur du Cambodge                                                         | Virology Unit, Institut Pasteur du Cambodge                                                                         | Sokhoun Yann, Teypoutita Ou, Leakhena Pum, Ly Sovann, Kraing Sidonn, Yi Sengdoeurn, Chin Savuth, Chau Darapheak, Veasna Duong, Erik A Karlsson                                                                                                                                                                                                                                                                                                                                                                         |
| EPI_ISL_1533281                                                                                      | University Hospitals of Geneva, Laboratory of Virology                                              | HUG, Laboratory of Virology and the Health2030 Genome Center                                                        | Samuel Cordey, Ana Rita Goncalves, Laurent Kaiser, Lorenzo Cerutti, Henri Pegeot, Melyssa Elies, Deborah Penet, Keith Harshman, Ioannis Xenarios, Emmanouil Dermitzakis                                                                                                                                                                                                                                                                                                                                                |
| EPI_ISL_1533735, EPI_ISL_1533740, EPI_ISL_1533741, EPI_ISL_1533765, EPI_ISL_1533768, EPI_ISL_1533778 | National Centre For Cell Science                                                                    | National Centre For Cell Science - INSACOG                                                                          | Dhiraj Paul, Sonal Manik Chavan, Mohak P Gujare, Shivang P. Bhanushali, Mitali Inamdar, Manoj Kumar Bhat, Ajay Pillai, INSACOG Consortium team, Yogesh Shouche                                                                                                                                                                                                                                                                                                                                                         |
| EPI_ISL_1533804, EPI_ISL_1533806, EPI_ISL_1533846, EPI_ISL_1533847, EPI_ISL_1533848, EPI_ISL_1533851 | Centre for Dengue Research and AICBU, Department of Immunology and Molecular Medicine               | Centre for Dengue Research and AICBU, Department of Immunology and Molecular Medicine                               | Chandima Jeewandara, Deshni Jayathilaka, Dinuka Ariyaratne, Deshan Madhusanka, Diyanath Ranasinghe, Laksiri Gomes, Gathsaurie Neelika Malavige                                                                                                                                                                                                                                                                                                                                                                         |
| EPI_ISL_1533977                                                                                      | Laboratorio de Virologia Molecular / UFRJ                                                           | Laboratory of Respiratory Viruses and Measles, Oswaldo Cruz Institute, FIOCRUZ                                      | Paola Resende, Carolina M Voloch, Luciana Appolinario, Fernando Motta, Anna Carolina Paixao, Ana Carolina Mendonca, Alice Sampaio Rocha, Renata Serrano Lopes, Amilcar Tanuri, Marilda Siqueira on behalf of the Fiocruz COVID-19 Genomic Surveillance Network                                                                                                                                                                                                                                                         |
| EPI_ISL_1533990                                                                                      | Laboratorio Central de Saude Publica do Estado de Santa Catarina (LACEN-SC)                         | Laboratory of Respiratory Viruses and Measles, Oswaldo Cruz Institute, FIOCRUZ                                      | Paola Resende, Luciana Appolinario, Fernando Motta, Anna Carolina Paixao, Ana Carolina Mendonca, Alice Sampaio Rocha, Renata Serrano Lopes, Darcia Buerger Rovaris, Sandra Bianchini Fernandes, Marilda Siqueira on behalf of the Fiocruz COVID-19 Genomic Surveillance Network                                                                                                                                                                                                                                        |
| EPI_ISL_1534183, EPI_ISL_1534211                                                                     | Centro de Investigación Biomédica de La Rioja - Hospital San Pedro Logroño                          | SeqCOVID-SPAIN consortium/IBV(CSIC)                                                                                 | María de Toro, José Manuel Azcona Gutiérrez, María Pilar Bea Escudero, Miriam Blasco Alberdi and SeqCOVID-SPAIN consortium                                                                                                                                                                                                                                                                                                                                                                                             |
| EPI_ISL_1534464, EPI_ISL_1534466                                                                     | Ministry of Health Turkey                                                                           | Ministry of Health Turkey                                                                                           | Fatma Bayraktar, Yasemin Cosgun, Suleyman Yalcin, Gulay Korukluoglu                                                                                                                                                                                                                                                                                                                                                                                                                                                    |
| EPI_ISL_1534537, EPI_ISL_1534538, EPI_ISL_1534539                                                    | Virology Unit, Institut Pasteur du Cambodge                                                         | Virology Unit, Institut Pasteur du Cambodge                                                                         | Sokhoun Yann, Teypoutita Ou, Leakhena Pum, Ly Sovann, Kraing Sidonn, Yi Sengdoeurn, Chin Savuth, Chau Darapheak, Veasna Duong, Erik A Karlsson                                                                                                                                                                                                                                                                                                                                                                         |
| EPI_ISL_1534545, EPI_ISL_1534548, EPI_ISL_1534585, EPI_ISL_1534587                                   | Genetica Molecular and Subdepartamento de Virologia ISP Chile                                       | Instituto de Salud Publica de Chile                                                                                 | Javier Tognarelli, Karen Orostica, Barbara Parra, Loredana Arata, Jaime Lagos, Gisselle Barra, Patricia Bustos, Rodrigo Fasce, Andres Castillo, Jorge Fernandez                                                                                                                                                                                                                                                                                                                                                        |
| EPI_ISL_1534732                                                                                      | AZDelta                                                                                             | AZDelta                                                                                                             | Geert Martens; Dieter De Smet                                                                                                                                                                                                                                                                                                                                                                                                                                                                                          |
| EPI_ISL_1534995, EPI_ISL_1535110, EPI_ISL_1535151                                                    | Lighthouse Lab in Alderley Park                                                                     | Wellcome Sanger Institute for the COVID-19 Genomics UK (COG-UK) Consortium                                          | Jacquelyn Wynn, Mairead Hyland, The Lighthouse Lab in Alderley Park and Alex Alderton, Roberto Amato, Jeffrey Barrett, Sonia Goncalves, Ewan Harrison, David K. Jackson, Ian Johnston, Dominic Kwiatkowski, Cordelia Langford, John Sillitoe on behalf of the Wellcome Sanger Institute COVID-19 Surveillance Team                                                                                                                                                                                                     |
| EPI_ISL_1535379, EPI_ISL_1535479, EPI_ISL_1535526, EPI_ISL_1535562, EPI_ISL_1535591, EPI_ISL_1535880 | Lighthouse Lab in Milton Keynes                                                                     | Wellcome Sanger Institute for the COVID-19 Genomics UK (COG-UK) Consortium                                          | The Lighthouse Lab in Milton Keynes and Alex Alderton, Roberto Amato, Jeffrey Barrett, Sonia Goncalves, Ewan Harrison, David K. Jackson, Ian Johnston, Dominic Kwiatkowski, Cordelia Langford, John Sillitoe on behalf of the Wellcome Sanger Institute COVID-19 Surveillance Team                                                                                                                                                                                                                                     |
| EPI_ISL_1536192, EPI_ISL_1536391, EPI_ISL_1536530                                                    | Lighthouse Lab in Alderley Park                                                                     | Wellcome Sanger Institute for the COVID-19 Genomics UK (COG-UK) Consortium                                          | Jacquelyn Wynn, Mairead Hyland, The Lighthouse Lab in Alderley Park and Alex Alderton, Roberto Amato, Jeffrey Barrett, Sonia Goncalves, Ewan Harrison, David K. Jackson, Ian Johnston, Dominic Kwiatkowski, Cordelia Langford, John Sillitoe on behalf of the Wellcome Sanger Institute COVID-19 Surveillance Team                                                                                                                                                                                                     |
| EPI_ISL_1536613                                                                                      | Lighthouse Lab in Glasgow                                                                           | Wellcome Sanger Institute for the COVID-19 Genomics UK (COG-UK) Consortium                                          | Harper VanSteenhouse, Yumi Kasai, David Gray, Carol Clugston, Anna Dominiczak and Alex Alderton, Roberto Amato, Jeffrey Barrett, Sonia Goncalves, Ewan Harrison, David K. Jackson, Ian Johnston, Dominic Kwiatkowski, Cordelia Langford, John Sillitoe on behalf of the Wellcome Sanger Institute COVID-19 Surveillance Team                                                                                                                                                                                           |
| EPI_ISL_1537315                                                                                      | Lighthouse Lab in Alderley Park                                                                     | Wellcome Sanger Institute for the COVID-19 Genomics UK (COG-UK) Consortium                                          | Jacquelyn Wynn, Mairead Hyland, The Lighthouse Lab in Alderley Park and Alex Alderton, Roberto Amato, Jeffrey Barrett, Sonia Goncalves, Ewan Harrison, David K. Jackson, Ian Johnston, Dominic Kwiatkowski, Cordelia Langford, John Sillitoe on behalf of the Wellcome Sanger Institute COVID-19 Surveillance Team                                                                                                                                                                                                     |
| EPI_ISL_1537349, EPI_ISL_1537353, EPI_ISL_1537510                                                    | Lighthouse Lab in Glasgow                                                                           | Wellcome Sanger Institute for the COVID-19 Genomics UK (COG-UK) Consortium                                          | Harper VanSteenhouse, Yumi Kasai, David Gray, Carol Clugston, Anna Dominiczak and Alex Alderton, Roberto Amato, Jeffrey Barrett, Sonia Goncalves, Ewan Harrison, David K. Jackson, Ian Johnston, Dominic Kwiatkowski, Cordelia Langford, John Sillitoe on behalf of the Wellcome Sanger Institute COVID-19 Surveillance Team                                                                                                                                                                                           |
| EPI_ISL_1537638                                                                                      | Lighthouse Lab in Milton Keynes                                                                     | Wellcome Sanger Institute for the COVID-19 Genomics UK (COG-UK) Consortium                                          | The Lighthouse Lab in Milton Keynes and Alex Alderton, Roberto Amato, Jeffrey Barrett, Sonia Goncalves, Ewan Harrison, David K. Jackson, Ian Johnston, Dominic Kwiatkowski, Cordelia Langford, John Sillitoe on behalf of the Wellcome Sanger Institute COVID-19 Surveillance Team                                                                                                                                                                                                                                     |
| EPI_ISL_1537759, EPI_ISL_1538283                                                                     | Lighthouse Lab in Alderley Park                                                                     | Wellcome Sanger Institute for the COVID-19 Genomics UK (COG-UK) Consortium                                          | Jacquelyn Wynn, Mairead Hyland, The Lighthouse Lab in Alderley Park and Alex Alderton, Roberto Amato, Jeffrey Barrett, Sonia Goncalves, Ewan Harrison, David K. Jackson, Ian Johnston, Dominic Kwiatkowski, Cordelia Langford, John Sillitoe on behalf of the Wellcome Sanger Institute COVID-19 Surveillance Team                                                                                                                                                                                                     |
| EPI_ISL_1538416                                                                                      | Department of Genetic Engineering and Biotechnology, Shahjalal University of Science and Technology | Genomic Research Lab, BCSIR                                                                                         | Md. Shamsul Haque Proshan, Md. Murshed Hasan Sarkar, Abu Sayeed Mohammad Mahmud, Mohammad Samir Uzzaman, Eshrar Osman, Md. Ahasan Habib, Shahina Akter, Tanjina Akhter Banu, Barna Goswami, Iffat Jahan, Md. Saddam Hossain, Mohammad Mohi Uddin, Md. Hamdadul Hoque, G. M. Nurnabi Azad Jewel, Md. Nazmul Hasan, Md. Fahmid Hossain Bhuiyan, Md. Asrafal Jahan, Ajit Ghosh, Md. Akkas Ali, Md. Salim Khan                                                                                                             |
| EPI_ISL_1538425                                                                                      | Institute for Urban Disease Control and Prevention                                                  | COVID-19 Network Investigations (CONI) Alliance                                                                     | Elizabeth Batty, Wasun Chantraitta, Thanat Chookajorn, Stefan Fernandez, Angkana Huang, Anthony R. Jones, Khajohn Joonlasak, Chonticha Klungtong, Theerarat Kochakarn, Namfon Kotanan, Krittikorn Kumpornsin, Duangkamon Loesbanluechai, Wuditchai Manasatienkij, Bhakhoom Panthan, Ekawat Pasomsub, Kingkan Rakmanee, Insee Sornsorn, Janjira Thaipadungpanit, Aporn Wangwiwatrin, Treewat Watthanachockchai, Kamolthip Atsawawaranunt, Prayuth Kaewmalang, Amornmas Kongklieng, Pukkaporn Parnwijitkul, Vichan Pawun |
| EPI_ISL_1538432                                                                                      | Department of Genetic Engineering and Biotechnology, Shahjalal University of Science and Technology | Genomic Research Lab, BCSIR                                                                                         | Md. Murshed Hasan Sarkar, Abu Sayeed Mohammad Mahmud, Mohammad Samir Uzzaman, Eshrar Osman, Md. Ahasan Habib, Shahina Akter, Tanjina Akhter Banu, Barna Goswami, Iffat Jahan, Md. Saddam Hossain, Mohammad Mohi Uddin, Md. Shamsul Haque Proshan, Md. Hamdadul Hoque, G. M. Nurnabi Azad Jewel, Md. Nazmul Hasan, Md. Fahmid Hossain Bhuiyan, Md. Asrafal Jahan, Ajit Ghosh, Md. Akkas Ali, Md. Salim Khan                                                                                                             |
| EPI_ISL_1538445                                                                                      | Laboratorium Diagnostyki Molekularnej, Cytogenetyki i Cytometrii                                    | 1. National Institute of Public Health - National Institute of Hygiene; 2. Eurofins Genomics Europe Sequencing GmbH | Wokowicz Tomasz, Zacharczuk Katarzyna, Sadkowska-Todys Magorzata, Gierczyki Rafa, Eurofins Genomics Europe Sequencing Team, ECDC COVID-19 WGS support team                                                                                                                                                                                                                                                                                                                                                             |
| EPI_ISL_1538460                                                                                      | WSSE Kielce                                                                                         | 1. National Institute of Public Health - National Institute of Hygiene; 2. Eurofins Genomics Europe Sequencing GmbH | Wokowicz Tomasz, Zacharczuk Katarzyna, Sadkowska-Todys Magorzata, Gierczyki Rafa, Eurofins Genomics Europe Sequencing Team, ECDC COVID-19 WGS support team                                                                                                                                                                                                                                                                                                                                                             |
| EPI_ISL_1538472                                                                                      | WSSE Laboratorium Mikrobiologii i Parazytologii                                                     | 1. National Institute of Public Health - National Institute of Hygiene; 2. Eurofins Genomics Europe Sequencing GmbH | Wokowicz Tomasz, Zacharczuk Katarzyna, Sadkowska-Todys Magorzata, Gierczyki Rafa, Eurofins Genomics Europe Sequencing Team, ECDC COVID-19 WGS support team                                                                                                                                                                                                                                                                                                                                                             |
| EPI_ISL_1538587                                                                                      | LABORATORIUM BADA KLINICZNYCH WSSE w OPOLU                                                          | 1. National Institute of Public Health - National Institute of Hygiene; 2. Eurofins Genomics Europe Sequencing GmbH | Wokowicz Tomasz, Zacharczuk Katarzyna, Sadkowska-Todys Magorzata, Gierczyki Rafa, Eurofins Genomics Europe Sequencing Team, ECDC COVID-19 WGS support team                                                                                                                                                                                                                                                                                                                                                             |
| EPI_ISL_1538604                                                                                      | Laboratorium Analiz Lekarskich Alab Rzeszów                                                         | 1. National Institute of Public Health - National Institute of Hygiene; 2. Eurofins Genomics Europe Sequencing GmbH | Wokowicz Tomasz, Zacharczuk Katarzyna, Sadkowska-Todys Magorzata, Gierczyki Rafa, Eurofins Genomics Europe Sequencing Team, ECDC COVID-19 WGS support team                                                                                                                                                                                                                                                                                                                                                             |

|                                                                                                                                                                                                                                                                                                                                                                                                                                                                                                                                                                                                                                                                                                                                                                                                                                                                                                                                                                                                                                                                                                                                                                                                                                                                                                                                                                                                                                                                                                                                                                                                                                                                                                                                                                                                                                                                                                                                                                                                                                                                                                                                                                                                                                                                                                                                                                                                                                                                                                                                                                                                                                                                                                                                                                                                                                                                                                                                                                                                                                                                                                                                                                                                                                                                                                                                                                                                                                                                                                                                                                                                                                                                                                                                                                                                                                                                                                                                                                                                                                                                                                                                                                                                                                                                                                                                                                                                                                                                                                                                                                                                                                                                                                                                                                                                                                                                                                                                                                                                                                                                                                                                                                                                                                                                                                                                                                                                                                                                                                                                                                                                                                                                                                                                                                                                                                                                                                                                                                                                                                                                                                                                                                                                                                                                                                                                                                                                                                                                                                                                                                                                                                                                                                                                                                                                                                                                                                                                                                                                                                                                                                                                                                                                                                                                                                                                                                                                                                                                                                                                                                                                                                                                                                                                                                                                                                                                                                                                                                                                                                                                                                                                                                                                                                                                                                                                                                                                                                                                                                                                                                                                                                                                                                                                                                                                                                                                                                                                                                                                                                                                                                                                                                                                                                                                                                                                                                                                                                                                                                                                                                                                                                                                                                                                                                                                                                                                                                                                                                                                                                                                                                                                                                                                                                                                                                                                                                                                                                                                                                                                                                                                                                                                                                                                                                                                                                                                                       |                                                                                                                                                                                                                                                                                                      |                                                                                                                     |                                                                                                                                                                                                                                                        |
|---------------------------------------------------------------------------------------------------------------------------------------------------------------------------------------------------------------------------------------------------------------------------------------------------------------------------------------------------------------------------------------------------------------------------------------------------------------------------------------------------------------------------------------------------------------------------------------------------------------------------------------------------------------------------------------------------------------------------------------------------------------------------------------------------------------------------------------------------------------------------------------------------------------------------------------------------------------------------------------------------------------------------------------------------------------------------------------------------------------------------------------------------------------------------------------------------------------------------------------------------------------------------------------------------------------------------------------------------------------------------------------------------------------------------------------------------------------------------------------------------------------------------------------------------------------------------------------------------------------------------------------------------------------------------------------------------------------------------------------------------------------------------------------------------------------------------------------------------------------------------------------------------------------------------------------------------------------------------------------------------------------------------------------------------------------------------------------------------------------------------------------------------------------------------------------------------------------------------------------------------------------------------------------------------------------------------------------------------------------------------------------------------------------------------------------------------------------------------------------------------------------------------------------------------------------------------------------------------------------------------------------------------------------------------------------------------------------------------------------------------------------------------------------------------------------------------------------------------------------------------------------------------------------------------------------------------------------------------------------------------------------------------------------------------------------------------------------------------------------------------------------------------------------------------------------------------------------------------------------------------------------------------------------------------------------------------------------------------------------------------------------------------------------------------------------------------------------------------------------------------------------------------------------------------------------------------------------------------------------------------------------------------------------------------------------------------------------------------------------------------------------------------------------------------------------------------------------------------------------------------------------------------------------------------------------------------------------------------------------------------------------------------------------------------------------------------------------------------------------------------------------------------------------------------------------------------------------------------------------------------------------------------------------------------------------------------------------------------------------------------------------------------------------------------------------------------------------------------------------------------------------------------------------------------------------------------------------------------------------------------------------------------------------------------------------------------------------------------------------------------------------------------------------------------------------------------------------------------------------------------------------------------------------------------------------------------------------------------------------------------------------------------------------------------------------------------------------------------------------------------------------------------------------------------------------------------------------------------------------------------------------------------------------------------------------------------------------------------------------------------------------------------------------------------------------------------------------------------------------------------------------------------------------------------------------------------------------------------------------------------------------------------------------------------------------------------------------------------------------------------------------------------------------------------------------------------------------------------------------------------------------------------------------------------------------------------------------------------------------------------------------------------------------------------------------------------------------------------------------------------------------------------------------------------------------------------------------------------------------------------------------------------------------------------------------------------------------------------------------------------------------------------------------------------------------------------------------------------------------------------------------------------------------------------------------------------------------------------------------------------------------------------------------------------------------------------------------------------------------------------------------------------------------------------------------------------------------------------------------------------------------------------------------------------------------------------------------------------------------------------------------------------------------------------------------------------------------------------------------------------------------------------------------------------------------------------------------------------------------------------------------------------------------------------------------------------------------------------------------------------------------------------------------------------------------------------------------------------------------------------------------------------------------------------------------------------------------------------------------------------------------------------------------------------------------------------------------------------------------------------------------------------------------------------------------------------------------------------------------------------------------------------------------------------------------------------------------------------------------------------------------------------------------------------------------------------------------------------------------------------------------------------------------------------------------------------------------------------------------------------------------------------------------------------------------------------------------------------------------------------------------------------------------------------------------------------------------------------------------------------------------------------------------------------------------------------------------------------------------------------------------------------------------------------------------------------------------------------------------------------------------------------------------------------------------------------------------------------------------------------------------------------------------------------------------------------------------------------------------------------------------------------------------------------------------------------------------------------------------------------------------------------------------------------------------------------------------------------------------------------------------------------------------------------------------------------------------------------------------------------------------------------------------------------------------------------------------------------------------------------------------------------------------------------------------------------------------------------------------------------------------------------------------------------------------------------------------------------------------------------------------------------------------------------------------------------------------------------------------------------------------------------------------------------------------------------------------------------------------------------------------------------------------------------------------------------------------------------------------------------------------------------------------------------------------------------------------------------------------------------------------------------------------------------------------------------------------------------------------------------------------------------------------------------------------------------------------------------------------------------------------------------------------------------------------------------------------------------------------------------------------------------------------------------------------------------------------------------------------------------------------------------------------------------------------------------------------------------------------------------------------|------------------------------------------------------------------------------------------------------------------------------------------------------------------------------------------------------------------------------------------------------------------------------------------------------|---------------------------------------------------------------------------------------------------------------------|--------------------------------------------------------------------------------------------------------------------------------------------------------------------------------------------------------------------------------------------------------|
| EPI_ISL_1538680                                                                                                                                                                                                                                                                                                                                                                                                                                                                                                                                                                                                                                                                                                                                                                                                                                                                                                                                                                                                                                                                                                                                                                                                                                                                                                                                                                                                                                                                                                                                                                                                                                                                                                                                                                                                                                                                                                                                                                                                                                                                                                                                                                                                                                                                                                                                                                                                                                                                                                                                                                                                                                                                                                                                                                                                                                                                                                                                                                                                                                                                                                                                                                                                                                                                                                                                                                                                                                                                                                                                                                                                                                                                                                                                                                                                                                                                                                                                                                                                                                                                                                                                                                                                                                                                                                                                                                                                                                                                                                                                                                                                                                                                                                                                                                                                                                                                                                                                                                                                                                                                                                                                                                                                                                                                                                                                                                                                                                                                                                                                                                                                                                                                                                                                                                                                                                                                                                                                                                                                                                                                                                                                                                                                                                                                                                                                                                                                                                                                                                                                                                                                                                                                                                                                                                                                                                                                                                                                                                                                                                                                                                                                                                                                                                                                                                                                                                                                                                                                                                                                                                                                                                                                                                                                                                                                                                                                                                                                                                                                                                                                                                                                                                                                                                                                                                                                                                                                                                                                                                                                                                                                                                                                                                                                                                                                                                                                                                                                                                                                                                                                                                                                                                                                                                                                                                                                                                                                                                                                                                                                                                                                                                                                                                                                                                                                                                                                                                                                                                                                                                                                                                                                                                                                                                                                                                                                                                                                                                                                                                                                                                                                                                                                                                                                                                                                                                                                       | WSSE Laboratorium Mikrobiologii i Parazytologii                                                                                                                                                                                                                                                      | 1. National Institute of Public Health - National Institute of Hygiene; 2. Eurofins Genomics Europe Sequencing GmbH | Wokowicz Tomasz, Zacharczuk Katarzyna, Sadkowska-Todys Magorzata, Gierczyki Rafa, Eurofins Genomics Europe Sequencing Team, ECDC COVID-19 WGS support team                                                                                             |
| EPI_ISL_1538746                                                                                                                                                                                                                                                                                                                                                                                                                                                                                                                                                                                                                                                                                                                                                                                                                                                                                                                                                                                                                                                                                                                                                                                                                                                                                                                                                                                                                                                                                                                                                                                                                                                                                                                                                                                                                                                                                                                                                                                                                                                                                                                                                                                                                                                                                                                                                                                                                                                                                                                                                                                                                                                                                                                                                                                                                                                                                                                                                                                                                                                                                                                                                                                                                                                                                                                                                                                                                                                                                                                                                                                                                                                                                                                                                                                                                                                                                                                                                                                                                                                                                                                                                                                                                                                                                                                                                                                                                                                                                                                                                                                                                                                                                                                                                                                                                                                                                                                                                                                                                                                                                                                                                                                                                                                                                                                                                                                                                                                                                                                                                                                                                                                                                                                                                                                                                                                                                                                                                                                                                                                                                                                                                                                                                                                                                                                                                                                                                                                                                                                                                                                                                                                                                                                                                                                                                                                                                                                                                                                                                                                                                                                                                                                                                                                                                                                                                                                                                                                                                                                                                                                                                                                                                                                                                                                                                                                                                                                                                                                                                                                                                                                                                                                                                                                                                                                                                                                                                                                                                                                                                                                                                                                                                                                                                                                                                                                                                                                                                                                                                                                                                                                                                                                                                                                                                                                                                                                                                                                                                                                                                                                                                                                                                                                                                                                                                                                                                                                                                                                                                                                                                                                                                                                                                                                                                                                                                                                                                                                                                                                                                                                                                                                                                                                                                                                                                                                                       | Regionalne Centrum Krwiodawstwa i Krwiolecznictwa w Biamedystok Pracownia Diagnostyki Molekularnej wirusa SARS-CoV-2                                                                                                                                                                                 | 1. National Institute of Public Health - National Institute of Hygiene; 2. Eurofins Genomics Europe Sequencing GmbH | Wokowicz Tomasz, Zacharczuk Katarzyna, Sadkowska-Todys Magorzata, Gierczyki Rafa, Eurofins Genomics Europe Sequencing Team, ECDC COVID-19 WGS support team                                                                                             |
| EPI_ISL_1538775                                                                                                                                                                                                                                                                                                                                                                                                                                                                                                                                                                                                                                                                                                                                                                                                                                                                                                                                                                                                                                                                                                                                                                                                                                                                                                                                                                                                                                                                                                                                                                                                                                                                                                                                                                                                                                                                                                                                                                                                                                                                                                                                                                                                                                                                                                                                                                                                                                                                                                                                                                                                                                                                                                                                                                                                                                                                                                                                                                                                                                                                                                                                                                                                                                                                                                                                                                                                                                                                                                                                                                                                                                                                                                                                                                                                                                                                                                                                                                                                                                                                                                                                                                                                                                                                                                                                                                                                                                                                                                                                                                                                                                                                                                                                                                                                                                                                                                                                                                                                                                                                                                                                                                                                                                                                                                                                                                                                                                                                                                                                                                                                                                                                                                                                                                                                                                                                                                                                                                                                                                                                                                                                                                                                                                                                                                                                                                                                                                                                                                                                                                                                                                                                                                                                                                                                                                                                                                                                                                                                                                                                                                                                                                                                                                                                                                                                                                                                                                                                                                                                                                                                                                                                                                                                                                                                                                                                                                                                                                                                                                                                                                                                                                                                                                                                                                                                                                                                                                                                                                                                                                                                                                                                                                                                                                                                                                                                                                                                                                                                                                                                                                                                                                                                                                                                                                                                                                                                                                                                                                                                                                                                                                                                                                                                                                                                                                                                                                                                                                                                                                                                                                                                                                                                                                                                                                                                                                                                                                                                                                                                                                                                                                                                                                                                                                                                                                                                       | WSSE w Krakowie                                                                                                                                                                                                                                                                                      | 1. National Institute of Public Health - National Institute of Hygiene; 2. Eurofins Genomics Europe Sequencing GmbH | Wokowicz Tomasz, Zacharczuk Katarzyna, Sadkowska-Todys Magorzata, Gierczyki Rafa, Eurofins Genomics Europe Sequencing Team, ECDC COVID-19 WGS support team                                                                                             |
| EPI_ISL_1538798                                                                                                                                                                                                                                                                                                                                                                                                                                                                                                                                                                                                                                                                                                                                                                                                                                                                                                                                                                                                                                                                                                                                                                                                                                                                                                                                                                                                                                                                                                                                                                                                                                                                                                                                                                                                                                                                                                                                                                                                                                                                                                                                                                                                                                                                                                                                                                                                                                                                                                                                                                                                                                                                                                                                                                                                                                                                                                                                                                                                                                                                                                                                                                                                                                                                                                                                                                                                                                                                                                                                                                                                                                                                                                                                                                                                                                                                                                                                                                                                                                                                                                                                                                                                                                                                                                                                                                                                                                                                                                                                                                                                                                                                                                                                                                                                                                                                                                                                                                                                                                                                                                                                                                                                                                                                                                                                                                                                                                                                                                                                                                                                                                                                                                                                                                                                                                                                                                                                                                                                                                                                                                                                                                                                                                                                                                                                                                                                                                                                                                                                                                                                                                                                                                                                                                                                                                                                                                                                                                                                                                                                                                                                                                                                                                                                                                                                                                                                                                                                                                                                                                                                                                                                                                                                                                                                                                                                                                                                                                                                                                                                                                                                                                                                                                                                                                                                                                                                                                                                                                                                                                                                                                                                                                                                                                                                                                                                                                                                                                                                                                                                                                                                                                                                                                                                                                                                                                                                                                                                                                                                                                                                                                                                                                                                                                                                                                                                                                                                                                                                                                                                                                                                                                                                                                                                                                                                                                                                                                                                                                                                                                                                                                                                                                                                                                                                                                                                       | WSSE W odzi - laboratorium                                                                                                                                                                                                                                                                           | 1. National Institute of Public Health - National Institute of Hygiene; 2. Eurofins Genomics Europe Sequencing GmbH | Wokowicz Tomasz, Zacharczuk Katarzyna, Sadkowska-Todys Magorzata, Gierczyki Rafa, Eurofins Genomics Europe Sequencing Team, ECDC COVID-19 WGS support team                                                                                             |
| EPI_ISL_1538838                                                                                                                                                                                                                                                                                                                                                                                                                                                                                                                                                                                                                                                                                                                                                                                                                                                                                                                                                                                                                                                                                                                                                                                                                                                                                                                                                                                                                                                                                                                                                                                                                                                                                                                                                                                                                                                                                                                                                                                                                                                                                                                                                                                                                                                                                                                                                                                                                                                                                                                                                                                                                                                                                                                                                                                                                                                                                                                                                                                                                                                                                                                                                                                                                                                                                                                                                                                                                                                                                                                                                                                                                                                                                                                                                                                                                                                                                                                                                                                                                                                                                                                                                                                                                                                                                                                                                                                                                                                                                                                                                                                                                                                                                                                                                                                                                                                                                                                                                                                                                                                                                                                                                                                                                                                                                                                                                                                                                                                                                                                                                                                                                                                                                                                                                                                                                                                                                                                                                                                                                                                                                                                                                                                                                                                                                                                                                                                                                                                                                                                                                                                                                                                                                                                                                                                                                                                                                                                                                                                                                                                                                                                                                                                                                                                                                                                                                                                                                                                                                                                                                                                                                                                                                                                                                                                                                                                                                                                                                                                                                                                                                                                                                                                                                                                                                                                                                                                                                                                                                                                                                                                                                                                                                                                                                                                                                                                                                                                                                                                                                                                                                                                                                                                                                                                                                                                                                                                                                                                                                                                                                                                                                                                                                                                                                                                                                                                                                                                                                                                                                                                                                                                                                                                                                                                                                                                                                                                                                                                                                                                                                                                                                                                                                                                                                                                                                                                                       | WSSE w Warszawie                                                                                                                                                                                                                                                                                     | 1. National Institute of Public Health - National Institute of Hygiene; 2. Eurofins Genomics Europe Sequencing GmbH | Wokowicz Tomasz, Zacharczuk Katarzyna, Sadkowska-Todys Magorzata, Gierczyki Rafa, Eurofins Genomics Europe Sequencing Team, ECDC COVID-19 WGS support team                                                                                             |
| EPI_ISL_1538869                                                                                                                                                                                                                                                                                                                                                                                                                                                                                                                                                                                                                                                                                                                                                                                                                                                                                                                                                                                                                                                                                                                                                                                                                                                                                                                                                                                                                                                                                                                                                                                                                                                                                                                                                                                                                                                                                                                                                                                                                                                                                                                                                                                                                                                                                                                                                                                                                                                                                                                                                                                                                                                                                                                                                                                                                                                                                                                                                                                                                                                                                                                                                                                                                                                                                                                                                                                                                                                                                                                                                                                                                                                                                                                                                                                                                                                                                                                                                                                                                                                                                                                                                                                                                                                                                                                                                                                                                                                                                                                                                                                                                                                                                                                                                                                                                                                                                                                                                                                                                                                                                                                                                                                                                                                                                                                                                                                                                                                                                                                                                                                                                                                                                                                                                                                                                                                                                                                                                                                                                                                                                                                                                                                                                                                                                                                                                                                                                                                                                                                                                                                                                                                                                                                                                                                                                                                                                                                                                                                                                                                                                                                                                                                                                                                                                                                                                                                                                                                                                                                                                                                                                                                                                                                                                                                                                                                                                                                                                                                                                                                                                                                                                                                                                                                                                                                                                                                                                                                                                                                                                                                                                                                                                                                                                                                                                                                                                                                                                                                                                                                                                                                                                                                                                                                                                                                                                                                                                                                                                                                                                                                                                                                                                                                                                                                                                                                                                                                                                                                                                                                                                                                                                                                                                                                                                                                                                                                                                                                                                                                                                                                                                                                                                                                                                                                                                                                                       | Laboratorium Medyczne LAB-MED                                                                                                                                                                                                                                                                        | 1. National Institute of Public Health - National Institute of Hygiene; 2. Eurofins Genomics Europe Sequencing GmbH | Wokowicz Tomasz, Zacharczuk Katarzyna, Sadkowska-Todys Magorzata, Gierczyki Rafa, Eurofins Genomics Europe Sequencing Team, ECDC COVID-19 WGS support team                                                                                             |
| EPI_ISL_1538924                                                                                                                                                                                                                                                                                                                                                                                                                                                                                                                                                                                                                                                                                                                                                                                                                                                                                                                                                                                                                                                                                                                                                                                                                                                                                                                                                                                                                                                                                                                                                                                                                                                                                                                                                                                                                                                                                                                                                                                                                                                                                                                                                                                                                                                                                                                                                                                                                                                                                                                                                                                                                                                                                                                                                                                                                                                                                                                                                                                                                                                                                                                                                                                                                                                                                                                                                                                                                                                                                                                                                                                                                                                                                                                                                                                                                                                                                                                                                                                                                                                                                                                                                                                                                                                                                                                                                                                                                                                                                                                                                                                                                                                                                                                                                                                                                                                                                                                                                                                                                                                                                                                                                                                                                                                                                                                                                                                                                                                                                                                                                                                                                                                                                                                                                                                                                                                                                                                                                                                                                                                                                                                                                                                                                                                                                                                                                                                                                                                                                                                                                                                                                                                                                                                                                                                                                                                                                                                                                                                                                                                                                                                                                                                                                                                                                                                                                                                                                                                                                                                                                                                                                                                                                                                                                                                                                                                                                                                                                                                                                                                                                                                                                                                                                                                                                                                                                                                                                                                                                                                                                                                                                                                                                                                                                                                                                                                                                                                                                                                                                                                                                                                                                                                                                                                                                                                                                                                                                                                                                                                                                                                                                                                                                                                                                                                                                                                                                                                                                                                                                                                                                                                                                                                                                                                                                                                                                                                                                                                                                                                                                                                                                                                                                                                                                                                                                                                                       | LABORATORIUM BADA KLINICZNYCH WSSE w OPOLU                                                                                                                                                                                                                                                           | 1. National Institute of Public Health - National Institute of Hygiene; 2. Eurofins Genomics Europe Sequencing GmbH | Wokowicz Tomasz, Zacharczuk Katarzyna, Sadkowska-Todys Magorzata, Gierczyki Rafa, Eurofins Genomics Europe Sequencing Team, ECDC COVID-19 WGS support team                                                                                             |
| EPI_ISL_1538981                                                                                                                                                                                                                                                                                                                                                                                                                                                                                                                                                                                                                                                                                                                                                                                                                                                                                                                                                                                                                                                                                                                                                                                                                                                                                                                                                                                                                                                                                                                                                                                                                                                                                                                                                                                                                                                                                                                                                                                                                                                                                                                                                                                                                                                                                                                                                                                                                                                                                                                                                                                                                                                                                                                                                                                                                                                                                                                                                                                                                                                                                                                                                                                                                                                                                                                                                                                                                                                                                                                                                                                                                                                                                                                                                                                                                                                                                                                                                                                                                                                                                                                                                                                                                                                                                                                                                                                                                                                                                                                                                                                                                                                                                                                                                                                                                                                                                                                                                                                                                                                                                                                                                                                                                                                                                                                                                                                                                                                                                                                                                                                                                                                                                                                                                                                                                                                                                                                                                                                                                                                                                                                                                                                                                                                                                                                                                                                                                                                                                                                                                                                                                                                                                                                                                                                                                                                                                                                                                                                                                                                                                                                                                                                                                                                                                                                                                                                                                                                                                                                                                                                                                                                                                                                                                                                                                                                                                                                                                                                                                                                                                                                                                                                                                                                                                                                                                                                                                                                                                                                                                                                                                                                                                                                                                                                                                                                                                                                                                                                                                                                                                                                                                                                                                                                                                                                                                                                                                                                                                                                                                                                                                                                                                                                                                                                                                                                                                                                                                                                                                                                                                                                                                                                                                                                                                                                                                                                                                                                                                                                                                                                                                                                                                                                                                                                                                                                                       | Diagnostyka Sp. z o.o.                                                                                                                                                                                                                                                                               | 1. National Institute of Public Health - National Institute of Hygiene; 2. Eurofins Genomics Europe Sequencing GmbH | Wokowicz Tomasz, Zacharczuk Katarzyna, Sadkowska-Todys Magorzata, Gierczyki Rafa, Eurofins Genomics Europe Sequencing Team, ECDC COVID-19 WGS support team                                                                                             |
| EPI_ISL_1539000                                                                                                                                                                                                                                                                                                                                                                                                                                                                                                                                                                                                                                                                                                                                                                                                                                                                                                                                                                                                                                                                                                                                                                                                                                                                                                                                                                                                                                                                                                                                                                                                                                                                                                                                                                                                                                                                                                                                                                                                                                                                                                                                                                                                                                                                                                                                                                                                                                                                                                                                                                                                                                                                                                                                                                                                                                                                                                                                                                                                                                                                                                                                                                                                                                                                                                                                                                                                                                                                                                                                                                                                                                                                                                                                                                                                                                                                                                                                                                                                                                                                                                                                                                                                                                                                                                                                                                                                                                                                                                                                                                                                                                                                                                                                                                                                                                                                                                                                                                                                                                                                                                                                                                                                                                                                                                                                                                                                                                                                                                                                                                                                                                                                                                                                                                                                                                                                                                                                                                                                                                                                                                                                                                                                                                                                                                                                                                                                                                                                                                                                                                                                                                                                                                                                                                                                                                                                                                                                                                                                                                                                                                                                                                                                                                                                                                                                                                                                                                                                                                                                                                                                                                                                                                                                                                                                                                                                                                                                                                                                                                                                                                                                                                                                                                                                                                                                                                                                                                                                                                                                                                                                                                                                                                                                                                                                                                                                                                                                                                                                                                                                                                                                                                                                                                                                                                                                                                                                                                                                                                                                                                                                                                                                                                                                                                                                                                                                                                                                                                                                                                                                                                                                                                                                                                                                                                                                                                                                                                                                                                                                                                                                                                                                                                                                                                                                                                                                       | Dzia Diagnostyki Laboratoryjnej SPZOZ                                                                                                                                                                                                                                                                | 1. National Institute of Public Health - National Institute of Hygiene; 2. Eurofins Genomics Europe Sequencing GmbH | Wokowicz Tomasz, Zacharczuk Katarzyna, Sadkowska-Todys Magorzata, Gierczyki Rafa, Eurofins Genomics Europe Sequencing Team, ECDC COVID-19 WGS support team                                                                                             |
| EPI_ISL_1539004                                                                                                                                                                                                                                                                                                                                                                                                                                                                                                                                                                                                                                                                                                                                                                                                                                                                                                                                                                                                                                                                                                                                                                                                                                                                                                                                                                                                                                                                                                                                                                                                                                                                                                                                                                                                                                                                                                                                                                                                                                                                                                                                                                                                                                                                                                                                                                                                                                                                                                                                                                                                                                                                                                                                                                                                                                                                                                                                                                                                                                                                                                                                                                                                                                                                                                                                                                                                                                                                                                                                                                                                                                                                                                                                                                                                                                                                                                                                                                                                                                                                                                                                                                                                                                                                                                                                                                                                                                                                                                                                                                                                                                                                                                                                                                                                                                                                                                                                                                                                                                                                                                                                                                                                                                                                                                                                                                                                                                                                                                                                                                                                                                                                                                                                                                                                                                                                                                                                                                                                                                                                                                                                                                                                                                                                                                                                                                                                                                                                                                                                                                                                                                                                                                                                                                                                                                                                                                                                                                                                                                                                                                                                                                                                                                                                                                                                                                                                                                                                                                                                                                                                                                                                                                                                                                                                                                                                                                                                                                                                                                                                                                                                                                                                                                                                                                                                                                                                                                                                                                                                                                                                                                                                                                                                                                                                                                                                                                                                                                                                                                                                                                                                                                                                                                                                                                                                                                                                                                                                                                                                                                                                                                                                                                                                                                                                                                                                                                                                                                                                                                                                                                                                                                                                                                                                                                                                                                                                                                                                                                                                                                                                                                                                                                                                                                                                                                                                       | Zakad Diagnostyki Molekularnej Nowotworów Dolnolskie Centrum Onkologii                                                                                                                                                                                                                               | 1. National Institute of Public Health - National Institute of Hygiene; 2. Eurofins Genomics Europe Sequencing GmbH | Wokowicz Tomasz, Zacharczuk Katarzyna, Sadkowska-Todys Magorzata, Gierczyki Rafa, Eurofins Genomics Europe Sequencing Team, ECDC COVID-19 WGS support team                                                                                             |
| EPI_ISL_1539013                                                                                                                                                                                                                                                                                                                                                                                                                                                                                                                                                                                                                                                                                                                                                                                                                                                                                                                                                                                                                                                                                                                                                                                                                                                                                                                                                                                                                                                                                                                                                                                                                                                                                                                                                                                                                                                                                                                                                                                                                                                                                                                                                                                                                                                                                                                                                                                                                                                                                                                                                                                                                                                                                                                                                                                                                                                                                                                                                                                                                                                                                                                                                                                                                                                                                                                                                                                                                                                                                                                                                                                                                                                                                                                                                                                                                                                                                                                                                                                                                                                                                                                                                                                                                                                                                                                                                                                                                                                                                                                                                                                                                                                                                                                                                                                                                                                                                                                                                                                                                                                                                                                                                                                                                                                                                                                                                                                                                                                                                                                                                                                                                                                                                                                                                                                                                                                                                                                                                                                                                                                                                                                                                                                                                                                                                                                                                                                                                                                                                                                                                                                                                                                                                                                                                                                                                                                                                                                                                                                                                                                                                                                                                                                                                                                                                                                                                                                                                                                                                                                                                                                                                                                                                                                                                                                                                                                                                                                                                                                                                                                                                                                                                                                                                                                                                                                                                                                                                                                                                                                                                                                                                                                                                                                                                                                                                                                                                                                                                                                                                                                                                                                                                                                                                                                                                                                                                                                                                                                                                                                                                                                                                                                                                                                                                                                                                                                                                                                                                                                                                                                                                                                                                                                                                                                                                                                                                                                                                                                                                                                                                                                                                                                                                                                                                                                                                                                                       | Szpital Uniwersytecki im. Karola Marcinkowskiego                                                                                                                                                                                                                                                     | 1. National Institute of Public Health - National Institute of Hygiene; 2. Eurofins Genomics Europe Sequencing GmbH | Wokowicz Tomasz, Zacharczuk Katarzyna, Sadkowska-Todys Magorzata, Gierczyki Rafa, Eurofins Genomics Europe Sequencing Team, ECDC COVID-19 WGS support team                                                                                             |
| EPI_ISL_1539082                                                                                                                                                                                                                                                                                                                                                                                                                                                                                                                                                                                                                                                                                                                                                                                                                                                                                                                                                                                                                                                                                                                                                                                                                                                                                                                                                                                                                                                                                                                                                                                                                                                                                                                                                                                                                                                                                                                                                                                                                                                                                                                                                                                                                                                                                                                                                                                                                                                                                                                                                                                                                                                                                                                                                                                                                                                                                                                                                                                                                                                                                                                                                                                                                                                                                                                                                                                                                                                                                                                                                                                                                                                                                                                                                                                                                                                                                                                                                                                                                                                                                                                                                                                                                                                                                                                                                                                                                                                                                                                                                                                                                                                                                                                                                                                                                                                                                                                                                                                                                                                                                                                                                                                                                                                                                                                                                                                                                                                                                                                                                                                                                                                                                                                                                                                                                                                                                                                                                                                                                                                                                                                                                                                                                                                                                                                                                                                                                                                                                                                                                                                                                                                                                                                                                                                                                                                                                                                                                                                                                                                                                                                                                                                                                                                                                                                                                                                                                                                                                                                                                                                                                                                                                                                                                                                                                                                                                                                                                                                                                                                                                                                                                                                                                                                                                                                                                                                                                                                                                                                                                                                                                                                                                                                                                                                                                                                                                                                                                                                                                                                                                                                                                                                                                                                                                                                                                                                                                                                                                                                                                                                                                                                                                                                                                                                                                                                                                                                                                                                                                                                                                                                                                                                                                                                                                                                                                                                                                                                                                                                                                                                                                                                                                                                                                                                                                                                                       | WSSD Olsztyn                                                                                                                                                                                                                                                                                         | 1. National Institute of Public Health - National Institute of Hygiene; 2. Eurofins Genomics Europe Sequencing GmbH | Wokowicz Tomasz, Zacharczuk Katarzyna, Sadkowska-Todys Magorzata, Gierczyki Rafa, Eurofins Genomics Europe Sequencing Team, ECDC COVID-19 WGS support team                                                                                             |
| EPI_ISL_1539089                                                                                                                                                                                                                                                                                                                                                                                                                                                                                                                                                                                                                                                                                                                                                                                                                                                                                                                                                                                                                                                                                                                                                                                                                                                                                                                                                                                                                                                                                                                                                                                                                                                                                                                                                                                                                                                                                                                                                                                                                                                                                                                                                                                                                                                                                                                                                                                                                                                                                                                                                                                                                                                                                                                                                                                                                                                                                                                                                                                                                                                                                                                                                                                                                                                                                                                                                                                                                                                                                                                                                                                                                                                                                                                                                                                                                                                                                                                                                                                                                                                                                                                                                                                                                                                                                                                                                                                                                                                                                                                                                                                                                                                                                                                                                                                                                                                                                                                                                                                                                                                                                                                                                                                                                                                                                                                                                                                                                                                                                                                                                                                                                                                                                                                                                                                                                                                                                                                                                                                                                                                                                                                                                                                                                                                                                                                                                                                                                                                                                                                                                                                                                                                                                                                                                                                                                                                                                                                                                                                                                                                                                                                                                                                                                                                                                                                                                                                                                                                                                                                                                                                                                                                                                                                                                                                                                                                                                                                                                                                                                                                                                                                                                                                                                                                                                                                                                                                                                                                                                                                                                                                                                                                                                                                                                                                                                                                                                                                                                                                                                                                                                                                                                                                                                                                                                                                                                                                                                                                                                                                                                                                                                                                                                                                                                                                                                                                                                                                                                                                                                                                                                                                                                                                                                                                                                                                                                                                                                                                                                                                                                                                                                                                                                                                                                                                                                                                                       | Laboratorium Analityczne Centrum                                                                                                                                                                                                                                                                     | 1. National Institute of Public Health - National Institute of Hygiene; 2. Eurofins Genomics Europe Sequencing GmbH | Wokowicz Tomasz, Zacharczuk Katarzyna, Sadkowska-Todys Magorzata, Gierczyki Rafa, Eurofins Genomics Europe Sequencing Team, ECDC COVID-19 WGS support team                                                                                             |
| EPI_ISL_1539098                                                                                                                                                                                                                                                                                                                                                                                                                                                                                                                                                                                                                                                                                                                                                                                                                                                                                                                                                                                                                                                                                                                                                                                                                                                                                                                                                                                                                                                                                                                                                                                                                                                                                                                                                                                                                                                                                                                                                                                                                                                                                                                                                                                                                                                                                                                                                                                                                                                                                                                                                                                                                                                                                                                                                                                                                                                                                                                                                                                                                                                                                                                                                                                                                                                                                                                                                                                                                                                                                                                                                                                                                                                                                                                                                                                                                                                                                                                                                                                                                                                                                                                                                                                                                                                                                                                                                                                                                                                                                                                                                                                                                                                                                                                                                                                                                                                                                                                                                                                                                                                                                                                                                                                                                                                                                                                                                                                                                                                                                                                                                                                                                                                                                                                                                                                                                                                                                                                                                                                                                                                                                                                                                                                                                                                                                                                                                                                                                                                                                                                                                                                                                                                                                                                                                                                                                                                                                                                                                                                                                                                                                                                                                                                                                                                                                                                                                                                                                                                                                                                                                                                                                                                                                                                                                                                                                                                                                                                                                                                                                                                                                                                                                                                                                                                                                                                                                                                                                                                                                                                                                                                                                                                                                                                                                                                                                                                                                                                                                                                                                                                                                                                                                                                                                                                                                                                                                                                                                                                                                                                                                                                                                                                                                                                                                                                                                                                                                                                                                                                                                                                                                                                                                                                                                                                                                                                                                                                                                                                                                                                                                                                                                                                                                                                                                                                                                                                                       | Diagnostyka                                                                                                                                                                                                                                                                                          | 1. National Institute of Public Health - National Institute of Hygiene; 2. Eurofins Genomics Europe Sequencing GmbH | Wokowicz Tomasz, Zacharczuk Katarzyna, Sadkowska-Todys Magorzata, Gierczyki Rafa, Eurofins Genomics Europe Sequencing Team, ECDC COVID-19 WGS support team                                                                                             |
| EPI_ISL_1539151                                                                                                                                                                                                                                                                                                                                                                                                                                                                                                                                                                                                                                                                                                                                                                                                                                                                                                                                                                                                                                                                                                                                                                                                                                                                                                                                                                                                                                                                                                                                                                                                                                                                                                                                                                                                                                                                                                                                                                                                                                                                                                                                                                                                                                                                                                                                                                                                                                                                                                                                                                                                                                                                                                                                                                                                                                                                                                                                                                                                                                                                                                                                                                                                                                                                                                                                                                                                                                                                                                                                                                                                                                                                                                                                                                                                                                                                                                                                                                                                                                                                                                                                                                                                                                                                                                                                                                                                                                                                                                                                                                                                                                                                                                                                                                                                                                                                                                                                                                                                                                                                                                                                                                                                                                                                                                                                                                                                                                                                                                                                                                                                                                                                                                                                                                                                                                                                                                                                                                                                                                                                                                                                                                                                                                                                                                                                                                                                                                                                                                                                                                                                                                                                                                                                                                                                                                                                                                                                                                                                                                                                                                                                                                                                                                                                                                                                                                                                                                                                                                                                                                                                                                                                                                                                                                                                                                                                                                                                                                                                                                                                                                                                                                                                                                                                                                                                                                                                                                                                                                                                                                                                                                                                                                                                                                                                                                                                                                                                                                                                                                                                                                                                                                                                                                                                                                                                                                                                                                                                                                                                                                                                                                                                                                                                                                                                                                                                                                                                                                                                                                                                                                                                                                                                                                                                                                                                                                                                                                                                                                                                                                                                                                                                                                                                                                                                                                                                       | Laboratorium Badawczo-Rozwojowe Vitagenum                                                                                                                                                                                                                                                            | 1. National Institute of Public Health - National Institute of Hygiene; 2. Eurofins Genomics Europe Sequencing GmbH | Wokowicz Tomasz, Zacharczuk Katarzyna, Sadkowska-Todys Magorzata, Gierczyki Rafa, Eurofins Genomics Europe Sequencing Team, ECDC COVID-19 WGS support team                                                                                             |
| EPI_ISL_1539492, EPI_ISL_1539686, EPI_ISL_1539843, EPI_ISL_1539990                                                                                                                                                                                                                                                                                                                                                                                                                                                                                                                                                                                                                                                                                                                                                                                                                                                                                                                                                                                                                                                                                                                                                                                                                                                                                                                                                                                                                                                                                                                                                                                                                                                                                                                                                                                                                                                                                                                                                                                                                                                                                                                                                                                                                                                                                                                                                                                                                                                                                                                                                                                                                                                                                                                                                                                                                                                                                                                                                                                                                                                                                                                                                                                                                                                                                                                                                                                                                                                                                                                                                                                                                                                                                                                                                                                                                                                                                                                                                                                                                                                                                                                                                                                                                                                                                                                                                                                                                                                                                                                                                                                                                                                                                                                                                                                                                                                                                                                                                                                                                                                                                                                                                                                                                                                                                                                                                                                                                                                                                                                                                                                                                                                                                                                                                                                                                                                                                                                                                                                                                                                                                                                                                                                                                                                                                                                                                                                                                                                                                                                                                                                                                                                                                                                                                                                                                                                                                                                                                                                                                                                                                                                                                                                                                                                                                                                                                                                                                                                                                                                                                                                                                                                                                                                                                                                                                                                                                                                                                                                                                                                                                                                                                                                                                                                                                                                                                                                                                                                                                                                                                                                                                                                                                                                                                                                                                                                                                                                                                                                                                                                                                                                                                                                                                                                                                                                                                                                                                                                                                                                                                                                                                                                                                                                                                                                                                                                                                                                                                                                                                                                                                                                                                                                                                                                                                                                                                                                                                                                                                                                                                                                                                                                                                                                                                                                                                    | Colorado Department of Public Health and Environment                                                                                                                                                                                                                                                 | Colorado Department of Public Health and Environment                                                                | Laura Bankers, Molly C. Hetherington-Rauth, Diana Ir, Shannon Ely, Shannon R. Matzinger, Sarah Elizabeth Totten, Emily A. Travanty                                                                                                                     |
| EPI_ISL_1540447                                                                                                                                                                                                                                                                                                                                                                                                                                                                                                                                                                                                                                                                                                                                                                                                                                                                                                                                                                                                                                                                                                                                                                                                                                                                                                                                                                                                                                                                                                                                                                                                                                                                                                                                                                                                                                                                                                                                                                                                                                                                                                                                                                                                                                                                                                                                                                                                                                                                                                                                                                                                                                                                                                                                                                                                                                                                                                                                                                                                                                                                                                                                                                                                                                                                                                                                                                                                                                                                                                                                                                                                                                                                                                                                                                                                                                                                                                                                                                                                                                                                                                                                                                                                                                                                                                                                                                                                                                                                                                                                                                                                                                                                                                                                                                                                                                                                                                                                                                                                                                                                                                                                                                                                                                                                                                                                                                                                                                                                                                                                                                                                                                                                                                                                                                                                                                                                                                                                                                                                                                                                                                                                                                                                                                                                                                                                                                                                                                                                                                                                                                                                                                                                                                                                                                                                                                                                                                                                                                                                                                                                                                                                                                                                                                                                                                                                                                                                                                                                                                                                                                                                                                                                                                                                                                                                                                                                                                                                                                                                                                                                                                                                                                                                                                                                                                                                                                                                                                                                                                                                                                                                                                                                                                                                                                                                                                                                                                                                                                                                                                                                                                                                                                                                                                                                                                                                                                                                                                                                                                                                                                                                                                                                                                                                                                                                                                                                                                                                                                                                                                                                                                                                                                                                                                                                                                                                                                                                                                                                                                                                                                                                                                                                                                                                                                                                                                                                       | Hospital                                                                                                                                                                                                                                                                                             | National Reference Center for Viruses of Respiratory Infections, Institut Pasteur, Paris                            | Marion Barbet, Sylvie Behillil, Frédéric Lemoine, Corinne Mautrais, Christophe Malabat, Méline Bizard, Angela Brisebarre, Camille Capel, Louise Lefrançois, Etienne Simon-Lorière, Vincent Enouf, Maud Vanpeene, Sylvie van der Werf, Sylvaine Bastian |
| EPI_ISL_1540506, EPI_ISL_1540520, EPI_ISL_1540524, EPI_ISL_1540526, EPI_ISL_1540528                                                                                                                                                                                                                                                                                                                                                                                                                                                                                                                                                                                                                                                                                                                                                                                                                                                                                                                                                                                                                                                                                                                                                                                                                                                                                                                                                                                                                                                                                                                                                                                                                                                                                                                                                                                                                                                                                                                                                                                                                                                                                                                                                                                                                                                                                                                                                                                                                                                                                                                                                                                                                                                                                                                                                                                                                                                                                                                                                                                                                                                                                                                                                                                                                                                                                                                                                                                                                                                                                                                                                                                                                                                                                                                                                                                                                                                                                                                                                                                                                                                                                                                                                                                                                                                                                                                                                                                                                                                                                                                                                                                                                                                                                                                                                                                                                                                                                                                                                                                                                                                                                                                                                                                                                                                                                                                                                                                                                                                                                                                                                                                                                                                                                                                                                                                                                                                                                                                                                                                                                                                                                                                                                                                                                                                                                                                                                                                                                                                                                                                                                                                                                                                                                                                                                                                                                                                                                                                                                                                                                                                                                                                                                                                                                                                                                                                                                                                                                                                                                                                                                                                                                                                                                                                                                                                                                                                                                                                                                                                                                                                                                                                                                                                                                                                                                                                                                                                                                                                                                                                                                                                                                                                                                                                                                                                                                                                                                                                                                                                                                                                                                                                                                                                                                                                                                                                                                                                                                                                                                                                                                                                                                                                                                                                                                                                                                                                                                                                                                                                                                                                                                                                                                                                                                                                                                                                                                                                                                                                                                                                                                                                                                                                                                                                                                                                                   | Department of Microbiology, University Hospital Motol                                                                                                                                                                                                                                                | Department of Microbiology, University Hospital Motol                                                               | Klara Krivanekova, Katerina Chuda, Katerina Polackova, Ondrej Cinek, Pavel Drevinek, Ales Briksi, Petr Hubacek, Miroslav Zajac                                                                                                                         |
| EPI_ISL_1540572                                                                                                                                                                                                                                                                                                                                                                                                                                                                                                                                                                                                                                                                                                                                                                                                                                                                                                                                                                                                                                                                                                                                                                                                                                                                                                                                                                                                                                                                                                                                                                                                                                                                                                                                                                                                                                                                                                                                                                                                                                                                                                                                                                                                                                                                                                                                                                                                                                                                                                                                                                                                                                                                                                                                                                                                                                                                                                                                                                                                                                                                                                                                                                                                                                                                                                                                                                                                                                                                                                                                                                                                                                                                                                                                                                                                                                                                                                                                                                                                                                                                                                                                                                                                                                                                                                                                                                                                                                                                                                                                                                                                                                                                                                                                                                                                                                                                                                                                                                                                                                                                                                                                                                                                                                                                                                                                                                                                                                                                                                                                                                                                                                                                                                                                                                                                                                                                                                                                                                                                                                                                                                                                                                                                                                                                                                                                                                                                                                                                                                                                                                                                                                                                                                                                                                                                                                                                                                                                                                                                                                                                                                                                                                                                                                                                                                                                                                                                                                                                                                                                                                                                                                                                                                                                                                                                                                                                                                                                                                                                                                                                                                                                                                                                                                                                                                                                                                                                                                                                                                                                                                                                                                                                                                                                                                                                                                                                                                                                                                                                                                                                                                                                                                                                                                                                                                                                                                                                                                                                                                                                                                                                                                                                                                                                                                                                                                                                                                                                                                                                                                                                                                                                                                                                                                                                                                                                                                                                                                                                                                                                                                                                                                                                                                                                                                                                                                                                       | Baltic Medics                                                                                                                                                                                                                                                                                        | Lithuanian University of Health Sciences Hospital, Department of Genetics and Molecular Medicine                    | Rasa Ugenskiene, Darius Cereskevicius, Inga Nasvytiene, Zilve Zemeckiene, Mantas Saraukas, Marius Sukys, Rima Vainoriene, Astra Vitkauskiene, Renaldas Jurkevicius                                                                                     |
| EPI_ISL_1540714, EPI_ISL_1540715, EPI_ISL_1540716, EPI_ISL_1540717, EPI_ISL_1540719, EPI_ISL_1540720, EPI_ISL_1540724, EPI_ISL_1540725, EPI_ISL_1540726, EPI_ISL_1540728, EPI_ISL_1540729, EPI_ISL_1540730, EPI_ISL_1540731, EPI_ISL_1540732, EPI_ISL_1540733, EPI_ISL_1540734, EPI_ISL_1540735, EPI_ISL_1540736, EPI_ISL_1540737, EPI_ISL_1540738, EPI_ISL_1540739, EPI_ISL_1540740, EPI_ISL_1540741, EPI_ISL_1540742, EPI_ISL_1540743, EPI_ISL_1540744, EPI_ISL_1540745, EPI_ISL_1540746, EPI_ISL_1540747, EPI_ISL_1540748, EPI_ISL_1540749, EPI_ISL_1540750, EPI_ISL_1540751, EPI_ISL_1540752, EPI_ISL_1540753, EPI_ISL_1540754, EPI_ISL_1540755, EPI_ISL_1540756, EPI_ISL_1540757, EPI_ISL_1540758, EPI_ISL_1540759, EPI_ISL_1540760, EPI_ISL_1540761, EPI_ISL_1540762, EPI_ISL_1540763, EPI_ISL_1540764, EPI_ISL_1540765, EPI_ISL_1540766, EPI_ISL_1540767, EPI_ISL_1540768, EPI_ISL_1540769, EPI_ISL_1540770, EPI_ISL_1540771, EPI_ISL_1540772, EPI_ISL_1540773, EPI_ISL_1540774, EPI_ISL_1540775, EPI_ISL_1540776, EPI_ISL_1540777, EPI_ISL_1540778, EPI_ISL_1540779, EPI_ISL_1540780, EPI_ISL_1540781, EPI_ISL_1540782, EPI_ISL_1540783, EPI_ISL_1540784, EPI_ISL_1540785, EPI_ISL_1540786, EPI_ISL_1540787, EPI_ISL_1540788, EPI_ISL_1540789, EPI_ISL_1540790, EPI_ISL_1540791, EPI_ISL_1540792, EPI_ISL_1540793, EPI_ISL_1540794, EPI_ISL_1540795, EPI_ISL_1540796, EPI_ISL_1540797, EPI_ISL_1540798, EPI_ISL_1540799, EPI_ISL_1540800, EPI_ISL_1540801, EPI_ISL_1540802, EPI_ISL_1540803, EPI_ISL_1540804, EPI_ISL_1540805, EPI_ISL_1540806, EPI_ISL_1540807, EPI_ISL_1540808, EPI_ISL_1540809, EPI_ISL_1540810, EPI_ISL_1540811, EPI_ISL_1540812, EPI_ISL_1540813, EPI_ISL_1540814, EPI_ISL_1540815, EPI_ISL_1540816, EPI_ISL_1540817, EPI_ISL_1540818, EPI_ISL_1540819, EPI_ISL_1540820, EPI_ISL_1540821, EPI_ISL_1540822, EPI_ISL_1540823, EPI_ISL_1540824, EPI_ISL_1540825, EPI_ISL_1540826, EPI_ISL_1540827, EPI_ISL_1540828, EPI_ISL_1540829, EPI_ISL_1540830, EPI_ISL_1540831, EPI_ISL_1540832, EPI_ISL_1540833, EPI_ISL_1540834, EPI_ISL_1540835, EPI_ISL_1540836, EPI_ISL_1540837, EPI_ISL_1540838, EPI_ISL_1540839, EPI_ISL_1540840, EPI_ISL_1540841, EPI_ISL_1540842, EPI_ISL_1540843, EPI_ISL_1540844, EPI_ISL_1540845, EPI_ISL_1540846                                                                                                                                                                                                                                                                                                                                                                                                                                                                                                                                                                                                                                                                                                                                                                                                                                                                                                                                                                                                                                                                                                                                                                                                                                                                                                                                                                                                                                                                                                                                                                                                                                                                                                                                                                                                                                                                                                                                                                                                                                                                                                                                                                                                                                                                                                                                                                                                                                                                                                                                                                                                                                                                                                                                                                                                                                                                                                                                                                                                                                                                                                                                                                                                                                                                                                                                                                                                                                                                                                                                                                                                                                                                                                                                                                                                                                                                                                                                                                                                                                                                                                                                                                                                                                                                                                                                                                                                                                                                                                                                                                                                                                                                                                                                                                                                                                                                                                                                                                                                                                                                                                                                                                                                                                                                                                                                                                                                                                                                                                                                                                                                                                                                                                                                                                                                                                                                                                                                                                                                                                                                                                                                                                                                                                                                                                                                                                                                                                                                                                                                                                                                                                                                                                                                                                                                                                                                                                                                                                                                                                                                                                                                                                                                                                                                                                                                                                                                                                                                                                                                                                                                                                                                                                                                                                                                                                                                                                                                                                                                                                                                                                                                                                                                                                                                                                                                                                                                                                                                                                                                                                                                                        | see above<br>The Jackson Laboratory<br>The Jackson Laboratory<br>Bergeron D, Renzette N, Adams M, Omerza G, Kelly K, Long J, Li L<br>Javier Tognarelli, Karen Orostica, Barbara Parra, Loredana Arata, Jaime Lagos, Gisselle Barra, Patricia Bustos, Rodrigo Fasce, Andres Castillo, Jorge Fernandez |                                                                                                                     |                                                                                                                                                                                                                                                        |
| EPI_ISL_1541044                                                                                                                                                                                                                                                                                                                                                                                                                                                                                                                                                                                                                                                                                                                                                                                                                                                                                                                                                                                                                                                                                                                                                                                                                                                                                                                                                                                                                                                                                                                                                                                                                                                                                                                                                                                                                                                                                                                                                                                                                                                                                                                                                                                                                                                                                                                                                                                                                                                                                                                                                                                                                                                                                                                                                                                                                                                                                                                                                                                                                                                                                                                                                                                                                                                                                                                                                                                                                                                                                                                                                                                                                                                                                                                                                                                                                                                                                                                                                                                                                                                                                                                                                                                                                                                                                                                                                                                                                                                                                                                                                                                                                                                                                                                                                                                                                                                                                                                                                                                                                                                                                                                                                                                                                                                                                                                                                                                                                                                                                                                                                                                                                                                                                                                                                                                                                                                                                                                                                                                                                                                                                                                                                                                                                                                                                                                                                                                                                                                                                                                                                                                                                                                                                                                                                                                                                                                                                                                                                                                                                                                                                                                                                                                                                                                                                                                                                                                                                                                                                                                                                                                                                                                                                                                                                                                                                                                                                                                                                                                                                                                                                                                                                                                                                                                                                                                                                                                                                                                                                                                                                                                                                                                                                                                                                                                                                                                                                                                                                                                                                                                                                                                                                                                                                                                                                                                                                                                                                                                                                                                                                                                                                                                                                                                                                                                                                                                                                                                                                                                                                                                                                                                                                                                                                                                                                                                                                                                                                                                                                                                                                                                                                                                                                                                                                                                                                                                                       | Genetica Molecular and Subdepartamento de Virologia ISP Chile                                                                                                                                                                                                                                        | Instituto de Salud Publica de Chile                                                                                 |                                                                                                                                                                                                                                                        |
| EPI_ISL_1542077, EPI_ISL_1542078, EPI_ISL_1542079, EPI_ISL_1542080, EPI_ISL_1542081, EPI_ISL_1542082, EPI_ISL_1542083, EPI_ISL_1542084, EPI_ISL_1542085, EPI_ISL_1542086, EPI_ISL_1542087, EPI_ISL_1542088, EPI_ISL_1542089, EPI_ISL_1542090, EPI_ISL_1542091, EPI_ISL_1542092, EPI_ISL_1542093, EPI_ISL_1542094, EPI_ISL_1542095, EPI_ISL_1542096, EPI_ISL_1542097, EPI_ISL_1542098, EPI_ISL_1542099, EPI_ISL_1542100, EPI_ISL_1542101, EPI_ISL_1542102, EPI_ISL_1542103, EPI_ISL_1542104, EPI_ISL_1542105, EPI_ISL_1542106, EPI_ISL_1542107, EPI_ISL_1542108, EPI_ISL_1542109, EPI_ISL_1542110, EPI_ISL_1542111, EPI_ISL_1542112, EPI_ISL_1542113, EPI_ISL_1542114, EPI_ISL_1542115, EPI_ISL_1542116, EPI_ISL_1542117, EPI_ISL_1542118, EPI_ISL_1542119, EPI_ISL_1542120, EPI_ISL_1542121, EPI_ISL_1542122, EPI_ISL_1542123, EPI_ISL_1542124, EPI_ISL_1542125, EPI_ISL_1542126, EPI_ISL_1542127, EPI_ISL_1542128, EPI_ISL_1542129, EPI_ISL_1542130, EPI_ISL_1542131, EPI_ISL_1542132, EPI_ISL_1542133, EPI_ISL_1542134, EPI_ISL_1542135, EPI_ISL_1542136, EPI_ISL_1542137, EPI_ISL_1542138, EPI_ISL_1542139, EPI_ISL_1542140, EPI_ISL_1542141, EPI_ISL_1542142, EPI_ISL_1542143, EPI_ISL_1542144, EPI_ISL_1542145, EPI_ISL_1542146, EPI_ISL_1542147, EPI_ISL_1542148, EPI_ISL_1542149, EPI_ISL_1542150, EPI_ISL_1542151, EPI_ISL_1542152, EPI_ISL_1542153, EPI_ISL_1542154, EPI_ISL_1542155, EPI_ISL_1542156, EPI_ISL_1542157, EPI_ISL_1542158, EPI_ISL_1542159, EPI_ISL_1542160, EPI_ISL_1542161, EPI_ISL_1542162, EPI_ISL_1542163, EPI_ISL_1542164, EPI_ISL_1542165, EPI_ISL_1542166, EPI_ISL_1542167, EPI_ISL_1542168, EPI_ISL_1542169, EPI_ISL_1542170, EPI_ISL_1542171, EPI_ISL_1542172, EPI_ISL_1542173, EPI_ISL_1542174, EPI_ISL_1542175, EPI_ISL_1542176, EPI_ISL_1542177, EPI_ISL_1542178, EPI_ISL_1542179, EPI_ISL_1542180, EPI_ISL_1542181, EPI_ISL_1542182, EPI_ISL_1542183, EPI_ISL_1542184, EPI_ISL_1542185, EPI_ISL_1542186, EPI_ISL_1542187, EPI_ISL_1542188, EPI_ISL_1542189, EPI_ISL_1542190, EPI_ISL_1542191, EPI_ISL_1542192, EPI_ISL_1542193, EPI_ISL_1542194, EPI_ISL_1542195, EPI_ISL_1542196, EPI_ISL_1542197, EPI_ISL_1542198, EPI_ISL_1542199, EPI_ISL_1542200, EPI_ISL_1542201, EPI_ISL_1542202, EPI_ISL_1542203, EPI_ISL_1542204, EPI_ISL_1542205, EPI_ISL_1542206, EPI_ISL_1542207, EPI_ISL_1542208, EPI_ISL_1542209, EPI_ISL_1542210, EPI_ISL_1542211, EPI_ISL_1542212, EPI_ISL_1542213, EPI_ISL_1542214, EPI_ISL_1542215, EPI_ISL_1542216, EPI_ISL_1542217, EPI_ISL_1542218, EPI_ISL_1542219, EPI_ISL_1542220, EPI_ISL_1542221, EPI_ISL_1542222, EPI_ISL_1542223, EPI_ISL_1542224, EPI_ISL_1542225, EPI_ISL_1542226, EPI_ISL_1542227, EPI_ISL_1542228, EPI_ISL_1542229, EPI_ISL_1542230, EPI_ISL_1542231, EPI_ISL_1542232, EPI_ISL_1542233, EPI_ISL_1542234, EPI_ISL_1542235, EPI_ISL_1542236, EPI_ISL_1542237, EPI_ISL_1542238, EPI_ISL_1542239, EPI_ISL_1542240, EPI_ISL_1542241, EPI_ISL_1542242, EPI_ISL_1542243, EPI_ISL_1542244, EPI_ISL_1542245, EPI_ISL_1542246, EPI_ISL_1542247, EPI_ISL_1542248, EPI_ISL_1542249, EPI_ISL_1542250, EPI_ISL_1542251, EPI_ISL_1542252, EPI_ISL_1542253, EPI_ISL_1542254, EPI_ISL_1542255, EPI_ISL_1542256, EPI_ISL_1542257, EPI_ISL_1542258, EPI_ISL_1542259, EPI_ISL_1542260, EPI_ISL_1542261, EPI_ISL_1542262, EPI_ISL_1542263, EPI_ISL_1542264, EPI_ISL_1542265, EPI_ISL_1542266, EPI_ISL_1542267, EPI_ISL_1542268, EPI_ISL_1542269, EPI_ISL_1542270, EPI_ISL_1542271, EPI_ISL_1542272, EPI_ISL_1542273, EPI_ISL_1542274, EPI_ISL_1542275, EPI_ISL_1542276, EPI_ISL_1542277, EPI_ISL_1542278, EPI_ISL_1542279, EPI_ISL_1542280, EPI_ISL_1542281, EPI_ISL_1542282, EPI_ISL_1542283, EPI_ISL_1542284, EPI_ISL_1542285, EPI_ISL_1542286, EPI_ISL_1542287, EPI_ISL_1542288, EPI_ISL_1542289, EPI_ISL_1542290, EPI_ISL_1542291, EPI_ISL_1542292, EPI_ISL_1542293, EPI_ISL_1542294, EPI_ISL_1542295, EPI_ISL_1542296, EPI_ISL_1542297, EPI_ISL_1542298, EPI_ISL_1542299, EPI_ISL_1543000, EPI_ISL_1543001, EPI_ISL_1543002, EPI_ISL_1543003, EPI_ISL_1543004, EPI_ISL_1543005, EPI_ISL_1543006, EPI_ISL_1543007, EPI_ISL_1543008, EPI_ISL_1543009, EPI_ISL_1543010, EPI_ISL_1543011, EPI_ISL_1543012, EPI_ISL_1543013, EPI_ISL_1543014, EPI_ISL_1543015, EPI_ISL_1543016, EPI_ISL_1543017, EPI_ISL_1543018, EPI_ISL_1543019, EPI_ISL_1543020, EPI_ISL_1543021, EPI_ISL_1543022, EPI_ISL_1543023, EPI_ISL_1543024, EPI_ISL_1543025, EPI_ISL_1543026, EPI_ISL_1543027, EPI_ISL_1543028, EPI_ISL_1543029, EPI_ISL_1543030, EPI_ISL_1543031, EPI_ISL_1543032, EPI_ISL_1543033, EPI_ISL_1543034, EPI_ISL_1543035, EPI_ISL_1543036, EPI_ISL_1543037, EPI_ISL_1543038, EPI_ISL_1543039, EPI_ISL_1543040, EPI_ISL_1543041, EPI_ISL_1543042, EPI_ISL_1543043, EPI_ISL_1543044, EPI_ISL_1543045, EPI_ISL_1543046, EPI_ISL_1543047, EPI_ISL_1543048, EPI_ISL_1543049, EPI_ISL_1543050, EPI_ISL_1543051, EPI_ISL_1543052, EPI_ISL_1543053, EPI_ISL_1543054, EPI_ISL_1543055, EPI_ISL_1543056, EPI_ISL_1543057, EPI_ISL_1543058, EPI_ISL_1543059, EPI_ISL_1543060, EPI_ISL_1543061, EPI_ISL_1543062, EPI_ISL_1543063, EPI_ISL_1543064, EPI_ISL_1543065, EPI_ISL_1543066, EPI_ISL_1543067, EPI_ISL_1543068, EPI_ISL_1543069, EPI_ISL_1543070, EPI_ISL_1543071, EPI_ISL_1543072, EPI_ISL_1543073, EPI_ISL_1543074, EPI_ISL_1543075, EPI_ISL_1543076, EPI_ISL_1543077, EPI_ISL_1543078, EPI_ISL_1543079, EPI_ISL_1543080, EPI_ISL_1543081, EPI_ISL_1543082, EPI_ISL_1543083, EPI_ISL_1543084, EPI_ISL_1543085, EPI_ISL_1543086, EPI_ISL_1543087, EPI_ISL_1543088, EPI_ISL_1543089, EPI_ISL_1543090, EPI_ISL_1543091, EPI_ISL_1543092, EPI_ISL_1543093, EPI_ISL_1543094, EPI_ISL_1543095, EPI_ISL_1543096, EPI_ISL_1543097, EPI_ISL_1543098, EPI_ISL_1543099, EPI_ISL_1543100, EPI_ISL_1543101, EPI_ISL_1543102, EPI_ISL_1543103, EPI_ISL_1543104, EPI_ISL_1543105, EPI_ISL_1543106, EPI_ISL_1543107, EPI_ISL_1543108, EPI_ISL_1543109, EPI_ISL_1543110, EPI_ISL_1543111, EPI_ISL_1543112, EPI_ISL_1543113, EPI_ISL_1543114, EPI_ISL_1543115, EPI_ISL_1543116, EPI_ISL_1543117, EPI_ISL_1543118, EPI_ISL_1543119, EPI_ISL_1543120, EPI_ISL_1543121, EPI_ISL_1543122, EPI_ISL_1543123, EPI_ISL_1543124, EPI_ISL_1543125, EPI_ISL_1543126, EPI_ISL_1543127, EPI_ISL_1543128, EPI_ISL_1543129, EPI_ISL_1543130, EPI_ISL_1543131, EPI_ISL_1543132, EPI_ISL_1543133, EPI_ISL_1543134, EPI_ISL_1543135, EPI_ISL_1543136, EPI_ISL_1543137, EPI_ISL_1543138, EPI_ISL_1543139, EPI_ISL_1543140, EPI_ISL_1543141, EPI_ISL_1543142, EPI_ISL_1543143, EPI_ISL_1543144, EPI_ISL_1543145, EPI_ISL_1543146, EPI_ISL_1543147, EPI_ISL_1543148, EPI_ISL_1543149, EPI_ISL_1543150, EPI_ISL_1543151, EPI_ISL_1543152, EPI_ISL_1543153, EPI_ISL_1543154, EPI_ISL_1543155, EPI_ISL_1543156, EPI_ISL_1543157, EPI_ISL_1543158, EPI_ISL_1543159, EPI_ISL_1543160, EPI_ISL_1543161, EPI_ISL_1543162, EPI_ISL_1543163, EPI_ISL_1543164, EPI_ISL_1543165, EPI_ISL_1543166, EPI_ISL_1543167, EPI_ISL_1543168, EPI_ISL_1543169, EPI_ISL_1543170, EPI_ISL_1543171, EPI_ISL_1543172, EPI_ISL_1543173, EPI_ISL_1543174, EPI_ISL_1543175, EPI_ISL_1543176, EPI_ISL_1543177, EPI_ISL_1543178, EPI_ISL_1543179, EPI_ISL_1543180, EPI_ISL_1543181, EPI_ISL_1543182, EPI_ISL_1543183, EPI_ISL_1543184, EPI_ISL_1543185, EPI_ISL_1543186, EPI_ISL_1543187, EPI_ISL_1543188, EPI_ISL_1543189, EPI_ISL_1543190, EPI_ISL_1543191, EPI_ISL_1543192, EPI_ISL_1543193, EPI_ISL_1543194, EPI_ISL_1543195, EPI_ISL_1543196, EPI_ISL_1543197, EPI_ISL_1543198, EPI_ISL_1543199, EPI_ISL_1543200, EPI_ISL_1543201, EPI_ISL_1543202, EPI_ISL_1543203, EPI_ISL_1543204, EPI_ISL_1543205, EPI_ISL_1543206, EPI_ISL_1543207, EPI_ISL_1543208, EPI_ISL_1543209, EPI_ISL_1543210, EPI_ISL_1543211, EPI_ISL_1543212, EPI_ISL_1543213, EPI_ISL_1543214, EPI_ISL_1543215, EPI_ISL_1543216, EPI_ISL_1543217, EPI_ISL_1543218, EPI_ISL_1543219, EPI_ISL_1543220, EPI_ISL_1543221, EPI_ISL_1543222, EPI_ISL_1543223, EPI_ISL_1543224, EPI_ISL_1543225, EPI_ISL_1543226, EPI_ISL_1543227, EPI_ISL_1543228, EPI_ISL_1543229, EPI_ISL_1543230, EPI_ISL_1543231, EPI_ISL_1543232, EPI_ISL_1543233, EPI_ISL_1543234, EPI_ISL_1543235, EPI_ISL_1543236, EPI_ISL_1543237, EPI_ISL_1543238, EPI_ISL_1543239, EPI_ISL_1543240, EPI_ISL_1543241, EPI_ISL_1543242, EPI_ISL_1543243, EPI_ISL_1543244, EPI_ISL_1543245, EPI_ISL_1543246, EPI_ISL_1543247, EPI_ISL_1543248, EPI_ISL_1543249, EPI_ISL_1543250, EPI_ISL_1543251, EPI_ISL_1543252, EPI_ISL_1543253, EPI_ISL_1543254, EPI_ISL_1543255, EPI_ISL_1543256, EPI_ISL_1543257, EPI_ISL_1543258, EPI_ISL_1543259, EPI_ISL_1543260, EPI_ISL_1543261, EPI_ISL_1543262, EPI_ISL_1543263, EPI_ISL_1543264, EPI_ISL_1543265, EPI_ISL_1543266, EPI_ISL_1543267, EPI_ISL_1543268, EPI_ISL_1543269, EPI_ISL_1543270, EPI_ISL_1543271, EPI_ISL_1543272, EPI_ISL_1543273, EPI_ISL_1543274, EPI_ISL_1543275, EPI_ISL_1543276, EPI_ISL_1543277, EPI_ISL_1543278, EPI_ISL_1543279, EPI_ISL_1543280, EPI_ISL_1543281, EPI_ISL_1543282, EPI_ISL_1543283, EPI_ISL_1543284, EPI_ISL_1543285, EPI_ISL_1543286, EPI_ISL_1543287, EPI_ISL_1543288, EPI_ISL_1543289, EPI_ISL_1543290, EPI_ISL_1543291, EPI_ISL_1543292, EPI_ISL_1543293, EPI_ISL_1543294, EPI_ISL_1543295, EPI_ISL_1543296, EPI_ISL_1543297, EPI_ISL_1543298, EPI_ISL_1543299, EPI_ISL_1543300, EPI_ISL_1543301, EPI_ISL_1543302, EPI_ISL_1543303, EPI_ISL_1543304, EPI_ISL_1543305, EPI_ISL_1543306, EPI_ISL_1543307, EPI_ISL_1543308, EPI_ISL_1543309, EPI_ISL_1543310, EPI_ISL_1543311, EPI_ISL_1543312, EPI_ISL_1543313, EPI_ISL_1543314, EPI_ISL_1543315, EPI_ISL_1543316, EPI_ISL_1543317, EPI_ISL_1543318, EPI_ISL_1543319, EPI_ISL_1543320, EPI_ISL_1543321, EPI_ISL_1543322, EPI_ISL_1543323, EPI_ISL_1543324, EPI_ISL_1543325, EPI_ISL_1543326, EPI_ISL_1543327, EPI_ISL_1543328, EPI_ISL_1543329, EPI_ISL_1543330, EPI_ISL_1543331, EPI_ISL_1543332, EPI_ISL_1543333, EPI_ISL_1543334, EPI_ISL_1543335, EPI_ISL_1543336, EPI_ISL_1543337, EPI_ISL_1543338, EPI_ISL_1543339, EPI_ISL_1543340, EPI_ISL_1543341, EPI_ISL_1543342, EPI_ISL_1543343, EPI_ISL_1543344, EPI_ISL_1543345, EPI_ISL_1543346, EPI_ISL_1543347, EPI_ISL_1543348, EPI_ISL_1543349, EPI_ISL_1543350, EPI_ISL_1543351, EPI_ISL_1543352, EPI_ISL_1543353, EPI_ISL_1543354, EPI_ISL_1543355, EPI_ISL_1543356, EPI_ISL_1543357, EPI_ISL_1543358, EPI_ISL_1543359, EPI_ISL_1543360, EPI_ISL_1543361, EPI_ISL_1543362, EPI_ISL_1543363, EPI_ISL_1543364, EPI_ISL_1543365, EPI_ISL_1543366, EPI_ISL_1543367, EPI_ISL_1543368, EPI_ISL_1543369, EPI_ISL_1543370, EPI_ISL_1543371, EPI_ISL_1543372, EPI_ISL_1543373, EPI_ISL_1543374, EPI_ISL_1543375, EPI_ISL_1543376, EPI_ISL_1543377, EPI_ISL_1543378, EPI_ISL_1543379, EPI_ISL_1543380, EPI_ISL_1543381, EPI_ISL_1543382, EPI_ISL_1543383, EPI_ISL_1543384, EPI_ISL_1543385, EPI_ISL_1543386, EPI_ISL_1543387, EPI_ISL_1543388, EPI_ISL_1543389, EPI_ISL_1543390, EPI_ISL_1543391 | see above<br>Pandemic Response Lab - NYC<br>                                                                                                                                                                                                                                                         |                                                                                                                     |                                                                                                                                                                                                                                                        |

|                                                                                                                                                                                                                                                                                                                                                                                                                                                                                                                                                                                                                                                                                                                                                                                                                                                                                                                                                                                                                                                                                                                                                                                                                                                                                                                                                                                                                                                                                                                                                                                                                                                                                                                                                                                                                                                                                                                                                                                                                                                                                                                                                                                                                                                                                                                                                                                                                                                                                                                                                                                                                                                                                                                                                                                                                                                                                                                                                                                                                                                                                                                                                                                                                                                                                                                                                                                                                                                                                                                                                                                                                                                                                                                                                                                                                                                                                                                                                                                                                                                                                                                                                                                                                                                                                                                                                                                                                                                                                                                                                                                                                                                                                                                                                                                                                                                                                                                                                                                                                                                                                                                                                                                                                                                                                                                                                                                                                                                                                                                                                                                                                                                                                                                                                                                                                                                                                                                                                                                                                                                                                                                                                                                                                                                                                                                                                                                                                                                                                                                                                                                                                                                                                                                                                                                                                                                                                                                                                                                                                                                                                                                                                                                                                                                                                                                                                                                                                                                                                                                                             |                                                                                                                |                                                                                                                                                                                                                                                                                                                                                                                                                                                                                                                                                                                                                                                                                                                                                                                                                                                                                                                                                                                                                                                 |                                                                                                                                                                                                                                                                                                                                                                                                                                                                                                                                                                                                                                                                                                                                                                                                                                                                                                                                                                                                                                                 |
|---------------------------------------------------------------------------------------------------------------------------------------------------------------------------------------------------------------------------------------------------------------------------------------------------------------------------------------------------------------------------------------------------------------------------------------------------------------------------------------------------------------------------------------------------------------------------------------------------------------------------------------------------------------------------------------------------------------------------------------------------------------------------------------------------------------------------------------------------------------------------------------------------------------------------------------------------------------------------------------------------------------------------------------------------------------------------------------------------------------------------------------------------------------------------------------------------------------------------------------------------------------------------------------------------------------------------------------------------------------------------------------------------------------------------------------------------------------------------------------------------------------------------------------------------------------------------------------------------------------------------------------------------------------------------------------------------------------------------------------------------------------------------------------------------------------------------------------------------------------------------------------------------------------------------------------------------------------------------------------------------------------------------------------------------------------------------------------------------------------------------------------------------------------------------------------------------------------------------------------------------------------------------------------------------------------------------------------------------------------------------------------------------------------------------------------------------------------------------------------------------------------------------------------------------------------------------------------------------------------------------------------------------------------------------------------------------------------------------------------------------------------------------------------------------------------------------------------------------------------------------------------------------------------------------------------------------------------------------------------------------------------------------------------------------------------------------------------------------------------------------------------------------------------------------------------------------------------------------------------------------------------------------------------------------------------------------------------------------------------------------------------------------------------------------------------------------------------------------------------------------------------------------------------------------------------------------------------------------------------------------------------------------------------------------------------------------------------------------------------------------------------------------------------------------------------------------------------------------------------------------------------------------------------------------------------------------------------------------------------------------------------------------------------------------------------------------------------------------------------------------------------------------------------------------------------------------------------------------------------------------------------------------------------------------------------------------------------------------------------------------------------------------------------------------------------------------------------------------------------------------------------------------------------------------------------------------------------------------------------------------------------------------------------------------------------------------------------------------------------------------------------------------------------------------------------------------------------------------------------------------------------------------------------------------------------------------------------------------------------------------------------------------------------------------------------------------------------------------------------------------------------------------------------------------------------------------------------------------------------------------------------------------------------------------------------------------------------------------------------------------------------------------------------------------------------------------------------------------------------------------------------------------------------------------------------------------------------------------------------------------------------------------------------------------------------------------------------------------------------------------------------------------------------------------------------------------------------------------------------------------------------------------------------------------------------------------------------------------------------------------------------------------------------------------------------------------------------------------------------------------------------------------------------------------------------------------------------------------------------------------------------------------------------------------------------------------------------------------------------------------------------------------------------------------------------------------------------------------------------------------------------------------------------------------------------------------------------------------------------------------------------------------------------------------------------------------------------------------------------------------------------------------------------------------------------------------------------------------------------------------------------------------------------------------------------------------------------------------------------------------------------------------------------------------------------------------------------------------------------------------------------------------------------------------------------------------------------------------------------------------------------------------------------------------------------------------------------------------------------------------------------------------------------------------------------------------------------------------------------------------------------------------------------------|----------------------------------------------------------------------------------------------------------------|-------------------------------------------------------------------------------------------------------------------------------------------------------------------------------------------------------------------------------------------------------------------------------------------------------------------------------------------------------------------------------------------------------------------------------------------------------------------------------------------------------------------------------------------------------------------------------------------------------------------------------------------------------------------------------------------------------------------------------------------------------------------------------------------------------------------------------------------------------------------------------------------------------------------------------------------------------------------------------------------------------------------------------------------------|-------------------------------------------------------------------------------------------------------------------------------------------------------------------------------------------------------------------------------------------------------------------------------------------------------------------------------------------------------------------------------------------------------------------------------------------------------------------------------------------------------------------------------------------------------------------------------------------------------------------------------------------------------------------------------------------------------------------------------------------------------------------------------------------------------------------------------------------------------------------------------------------------------------------------------------------------------------------------------------------------------------------------------------------------|
| EPI_ISL_1545285, EPI_ISL_1545286, EPI_ISL_1545314                                                                                                                                                                                                                                                                                                                                                                                                                                                                                                                                                                                                                                                                                                                                                                                                                                                                                                                                                                                                                                                                                                                                                                                                                                                                                                                                                                                                                                                                                                                                                                                                                                                                                                                                                                                                                                                                                                                                                                                                                                                                                                                                                                                                                                                                                                                                                                                                                                                                                                                                                                                                                                                                                                                                                                                                                                                                                                                                                                                                                                                                                                                                                                                                                                                                                                                                                                                                                                                                                                                                                                                                                                                                                                                                                                                                                                                                                                                                                                                                                                                                                                                                                                                                                                                                                                                                                                                                                                                                                                                                                                                                                                                                                                                                                                                                                                                                                                                                                                                                                                                                                                                                                                                                                                                                                                                                                                                                                                                                                                                                                                                                                                                                                                                                                                                                                                                                                                                                                                                                                                                                                                                                                                                                                                                                                                                                                                                                                                                                                                                                                                                                                                                                                                                                                                                                                                                                                                                                                                                                                                                                                                                                                                                                                                                                                                                                                                                                                                                                                           | Instituto Nacional de Investigação em Saúde                                                                    | KRISP, KZN Research Innovation and Sequencing Platform                                                                                                                                                                                                                                                                                                                                                                                                                                                                                                                                                                                                                                                                                                                                                                                                                                                                                                                                                                                          | Moraes J, Neto Z, Afonso P, Miranda J, David K, Inglês L, Pereira A, Paulo A Carralero RR Paixão JP, Freitas RH, Mufinda M, Lutucuta S, Giandhari J, Pillay S, Naidoo Y, Emmanuel SJ, Tegally H, Wilkinson E, de Oliveira T                                                                                                                                                                                                                                                                                                                                                                                                                                                                                                                                                                                                                                                                                                                                                                                                                     |
| EPI_ISL_1545669, EPI_ISL_1545692, EPI_ISL_1545729, EPI_ISL_1545749                                                                                                                                                                                                                                                                                                                                                                                                                                                                                                                                                                                                                                                                                                                                                                                                                                                                                                                                                                                                                                                                                                                                                                                                                                                                                                                                                                                                                                                                                                                                                                                                                                                                                                                                                                                                                                                                                                                                                                                                                                                                                                                                                                                                                                                                                                                                                                                                                                                                                                                                                                                                                                                                                                                                                                                                                                                                                                                                                                                                                                                                                                                                                                                                                                                                                                                                                                                                                                                                                                                                                                                                                                                                                                                                                                                                                                                                                                                                                                                                                                                                                                                                                                                                                                                                                                                                                                                                                                                                                                                                                                                                                                                                                                                                                                                                                                                                                                                                                                                                                                                                                                                                                                                                                                                                                                                                                                                                                                                                                                                                                                                                                                                                                                                                                                                                                                                                                                                                                                                                                                                                                                                                                                                                                                                                                                                                                                                                                                                                                                                                                                                                                                                                                                                                                                                                                                                                                                                                                                                                                                                                                                                                                                                                                                                                                                                                                                                                                                                                          | Azienda Sanitaria dell'Alto Adige Laboratorio Aziendale di Microbiologia e Virologia                           | Istituto di Genomica Applicata                                                                                                                                                                                                                                                                                                                                                                                                                                                                                                                                                                                                                                                                                                                                                                                                                                                                                                                                                                                                                  | Elisabetta Pagani, Irene Bianconi, Elisabetta Giacobazzi, Elisa Masi, Stefanie Wieser, Irina Jurman, Vera Vendramin, Gabriele Magris, Eleonora Paparelli, Davide Scaglione, Michele Morgante                                                                                                                                                                                                                                                                                                                                                                                                                                                                                                                                                                                                                                                                                                                                                                                                                                                    |
| EPI_ISL_1546062                                                                                                                                                                                                                                                                                                                                                                                                                                                                                                                                                                                                                                                                                                                                                                                                                                                                                                                                                                                                                                                                                                                                                                                                                                                                                                                                                                                                                                                                                                                                                                                                                                                                                                                                                                                                                                                                                                                                                                                                                                                                                                                                                                                                                                                                                                                                                                                                                                                                                                                                                                                                                                                                                                                                                                                                                                                                                                                                                                                                                                                                                                                                                                                                                                                                                                                                                                                                                                                                                                                                                                                                                                                                                                                                                                                                                                                                                                                                                                                                                                                                                                                                                                                                                                                                                                                                                                                                                                                                                                                                                                                                                                                                                                                                                                                                                                                                                                                                                                                                                                                                                                                                                                                                                                                                                                                                                                                                                                                                                                                                                                                                                                                                                                                                                                                                                                                                                                                                                                                                                                                                                                                                                                                                                                                                                                                                                                                                                                                                                                                                                                                                                                                                                                                                                                                                                                                                                                                                                                                                                                                                                                                                                                                                                                                                                                                                                                                                                                                                                                                             | Center for Laboratory Medicine St. Gallen                                                                      | Center for Laboratory Medicine St. Gallen                                                                                                                                                                                                                                                                                                                                                                                                                                                                                                                                                                                                                                                                                                                                                                                                                                                                                                                                                                                                       | Yannick Gerth                                                                                                                                                                                                                                                                                                                                                                                                                                                                                                                                                                                                                                                                                                                                                                                                                                                                                                                                                                                                                                   |
| EPI_ISL_1546243                                                                                                                                                                                                                                                                                                                                                                                                                                                                                                                                                                                                                                                                                                                                                                                                                                                                                                                                                                                                                                                                                                                                                                                                                                                                                                                                                                                                                                                                                                                                                                                                                                                                                                                                                                                                                                                                                                                                                                                                                                                                                                                                                                                                                                                                                                                                                                                                                                                                                                                                                                                                                                                                                                                                                                                                                                                                                                                                                                                                                                                                                                                                                                                                                                                                                                                                                                                                                                                                                                                                                                                                                                                                                                                                                                                                                                                                                                                                                                                                                                                                                                                                                                                                                                                                                                                                                                                                                                                                                                                                                                                                                                                                                                                                                                                                                                                                                                                                                                                                                                                                                                                                                                                                                                                                                                                                                                                                                                                                                                                                                                                                                                                                                                                                                                                                                                                                                                                                                                                                                                                                                                                                                                                                                                                                                                                                                                                                                                                                                                                                                                                                                                                                                                                                                                                                                                                                                                                                                                                                                                                                                                                                                                                                                                                                                                                                                                                                                                                                                                                             | Queens Medical Centre, Clinical Microbiology Department / DeepSeq Nottingham                                   | COVID-19 Genomics UK (COG-UK) Consortium                                                                                                                                                                                                                                                                                                                                                                                                                                                                                                                                                                                                                                                                                                                                                                                                                                                                                                                                                                                                        | Gemma Clark, Wendy Smith, Manjinder Khakh, Vicki M Fleming, Michelle M Lister, Hannah Howson-Wells, Jonathan Ball, Timothy Byaruhanga, Jayasree Dey, Emily Park, Jack Hill, Patrick McClure, Joseph Chappell, Theocharis Tsoleridis, Nadine Holmes, Matthew Carlisle, Christopher Moore, Fei Sang, Johnny Debebe, Victoria Wright, Matthew Loose                                                                                                                                                                                                                                                                                                                                                                                                                                                                                                                                                                                                                                                                                                |
| EPI_ISL_1546520, EPI_ISL_1546908, EPI_ISL_1546959                                                                                                                                                                                                                                                                                                                                                                                                                                                                                                                                                                                                                                                                                                                                                                                                                                                                                                                                                                                                                                                                                                                                                                                                                                                                                                                                                                                                                                                                                                                                                                                                                                                                                                                                                                                                                                                                                                                                                                                                                                                                                                                                                                                                                                                                                                                                                                                                                                                                                                                                                                                                                                                                                                                                                                                                                                                                                                                                                                                                                                                                                                                                                                                                                                                                                                                                                                                                                                                                                                                                                                                                                                                                                                                                                                                                                                                                                                                                                                                                                                                                                                                                                                                                                                                                                                                                                                                                                                                                                                                                                                                                                                                                                                                                                                                                                                                                                                                                                                                                                                                                                                                                                                                                                                                                                                                                                                                                                                                                                                                                                                                                                                                                                                                                                                                                                                                                                                                                                                                                                                                                                                                                                                                                                                                                                                                                                                                                                                                                                                                                                                                                                                                                                                                                                                                                                                                                                                                                                                                                                                                                                                                                                                                                                                                                                                                                                                                                                                                                                           | Originating lab: Wales Specialist Virology Centre Sequencing lab: Pathogen Genomics Unit                       | Public Health Wales Microbiology Cardiff Wales Specialist Virology Centre                                                                                                                                                                                                                                                                                                                                                                                                                                                                                                                                                                                                                                                                                                                                                                                                                                                                                                                                                                       | Catherine Moore, Johnathan Evans, Laura Gifford, Malorie Perry, Simon Cottrell, Angela Marchbank, Alec Birchley, Alexander Adams, Amy Gaskin, Bree Gatica-Wilcox, Jason Coombes, Joel Southgate, Lauren Gilbert, Lee Graham, Nicole Pacchiari, Sara Kumziene-Summerhayes, Sarah Taylor, Sophie Jones, Sara Rey, Matthew Bull, Joanne Watkins, Sally Corden, Tom Connor                                                                                                                                                                                                                                                                                                                                                                                                                                                                                                                                                                                                                                                                          |
| EPI_ISL_1547365                                                                                                                                                                                                                                                                                                                                                                                                                                                                                                                                                                                                                                                                                                                                                                                                                                                                                                                                                                                                                                                                                                                                                                                                                                                                                                                                                                                                                                                                                                                                                                                                                                                                                                                                                                                                                                                                                                                                                                                                                                                                                                                                                                                                                                                                                                                                                                                                                                                                                                                                                                                                                                                                                                                                                                                                                                                                                                                                                                                                                                                                                                                                                                                                                                                                                                                                                                                                                                                                                                                                                                                                                                                                                                                                                                                                                                                                                                                                                                                                                                                                                                                                                                                                                                                                                                                                                                                                                                                                                                                                                                                                                                                                                                                                                                                                                                                                                                                                                                                                                                                                                                                                                                                                                                                                                                                                                                                                                                                                                                                                                                                                                                                                                                                                                                                                                                                                                                                                                                                                                                                                                                                                                                                                                                                                                                                                                                                                                                                                                                                                                                                                                                                                                                                                                                                                                                                                                                                                                                                                                                                                                                                                                                                                                                                                                                                                                                                                                                                                                                                             | Department of Genetic Engineering and Biotechnology, Shahjalal University of Science and Technology            | Genomic Research Lab, BCSIR                                                                                                                                                                                                                                                                                                                                                                                                                                                                                                                                                                                                                                                                                                                                                                                                                                                                                                                                                                                                                     | Iffat Jahan, Md. Murshed Hasan Sarkar, Abu Sayeed Mohammad Mahmud, Mohammad Samir Uzzaman, Eshrar Osman, Md. Ahasan Habib, Shahina Akter, Tanjina Akhter Banu, Barna Goswami, Md. Saddam Hossain, Mohammad Mohi Uddin, Md. Shamsul Haque Proadhan, Md. Hammadul Hoque, G. M. Nurnabi Azad Jewel, Md. Nazmul Hasan, Md. Fahmid Hossain Bhuiyan, Md. Asrafu Jahan, Ajit Ghosh, Md. Akkas Ali, Md. Salim Khan                                                                                                                                                                                                                                                                                                                                                                                                                                                                                                                                                                                                                                      |
| EPI_ISL_1547372                                                                                                                                                                                                                                                                                                                                                                                                                                                                                                                                                                                                                                                                                                                                                                                                                                                                                                                                                                                                                                                                                                                                                                                                                                                                                                                                                                                                                                                                                                                                                                                                                                                                                                                                                                                                                                                                                                                                                                                                                                                                                                                                                                                                                                                                                                                                                                                                                                                                                                                                                                                                                                                                                                                                                                                                                                                                                                                                                                                                                                                                                                                                                                                                                                                                                                                                                                                                                                                                                                                                                                                                                                                                                                                                                                                                                                                                                                                                                                                                                                                                                                                                                                                                                                                                                                                                                                                                                                                                                                                                                                                                                                                                                                                                                                                                                                                                                                                                                                                                                                                                                                                                                                                                                                                                                                                                                                                                                                                                                                                                                                                                                                                                                                                                                                                                                                                                                                                                                                                                                                                                                                                                                                                                                                                                                                                                                                                                                                                                                                                                                                                                                                                                                                                                                                                                                                                                                                                                                                                                                                                                                                                                                                                                                                                                                                                                                                                                                                                                                                                             | Department of Genetic Engineering and Biotechnology, Shahjalal University of Science and Technology            | Genomic Research Lab, BCSIR                                                                                                                                                                                                                                                                                                                                                                                                                                                                                                                                                                                                                                                                                                                                                                                                                                                                                                                                                                                                                     | Mohammad Mohi Uddin, Md. Murshed Hasan Sarkar, Abu Sayeed Mohammad Mahmud, Mohammad Samir Uzzaman, Eshrar Osman, Md. Ahasan Habib, Shahina Akter, Tanjina Akhter Banu, Barna Goswami, Iffat Jahan, Md. Saddam Hossain, Md. Kamrul Islam, Md. Shamsul Haque Proadhan, Md. Hammadul Hoque, G. M. Nurnabi Azad Jewel, Md. Nazmul Hasan, Md. Fahmid Hossain Bhuiyan, Md. Asrafu Jahan, Ajit Ghosh, Md. Akkas Ali, Md. Salim Khan                                                                                                                                                                                                                                                                                                                                                                                                                                                                                                                                                                                                                    |
| EPI_ISL_1547424                                                                                                                                                                                                                                                                                                                                                                                                                                                                                                                                                                                                                                                                                                                                                                                                                                                                                                                                                                                                                                                                                                                                                                                                                                                                                                                                                                                                                                                                                                                                                                                                                                                                                                                                                                                                                                                                                                                                                                                                                                                                                                                                                                                                                                                                                                                                                                                                                                                                                                                                                                                                                                                                                                                                                                                                                                                                                                                                                                                                                                                                                                                                                                                                                                                                                                                                                                                                                                                                                                                                                                                                                                                                                                                                                                                                                                                                                                                                                                                                                                                                                                                                                                                                                                                                                                                                                                                                                                                                                                                                                                                                                                                                                                                                                                                                                                                                                                                                                                                                                                                                                                                                                                                                                                                                                                                                                                                                                                                                                                                                                                                                                                                                                                                                                                                                                                                                                                                                                                                                                                                                                                                                                                                                                                                                                                                                                                                                                                                                                                                                                                                                                                                                                                                                                                                                                                                                                                                                                                                                                                                                                                                                                                                                                                                                                                                                                                                                                                                                                                                             | Centre Hospitalier Universitaire Clermont-Ferrand                                                              | CHU Clermont-Ferrand, service de virologie                                                                                                                                                                                                                                                                                                                                                                                                                                                                                                                                                                                                                                                                                                                                                                                                                                                                                                                                                                                                      | Bisseux Maxime, Mirand Audrey, Combes Patricia, Henquel Cécile                                                                                                                                                                                                                                                                                                                                                                                                                                                                                                                                                                                                                                                                                                                                                                                                                                                                                                                                                                                  |
| EPI_ISL_1547604                                                                                                                                                                                                                                                                                                                                                                                                                                                                                                                                                                                                                                                                                                                                                                                                                                                                                                                                                                                                                                                                                                                                                                                                                                                                                                                                                                                                                                                                                                                                                                                                                                                                                                                                                                                                                                                                                                                                                                                                                                                                                                                                                                                                                                                                                                                                                                                                                                                                                                                                                                                                                                                                                                                                                                                                                                                                                                                                                                                                                                                                                                                                                                                                                                                                                                                                                                                                                                                                                                                                                                                                                                                                                                                                                                                                                                                                                                                                                                                                                                                                                                                                                                                                                                                                                                                                                                                                                                                                                                                                                                                                                                                                                                                                                                                                                                                                                                                                                                                                                                                                                                                                                                                                                                                                                                                                                                                                                                                                                                                                                                                                                                                                                                                                                                                                                                                                                                                                                                                                                                                                                                                                                                                                                                                                                                                                                                                                                                                                                                                                                                                                                                                                                                                                                                                                                                                                                                                                                                                                                                                                                                                                                                                                                                                                                                                                                                                                                                                                                                                             | Akershus University Hospital, Department for Microbiology and Infectious Disease Control                       | Norwegian Institute of Public Health, Department of Virology                                                                                                                                                                                                                                                                                                                                                                                                                                                                                                                                                                                                                                                                                                                                                                                                                                                                                                                                                                                    | Kathrine Stene-Johansen, Kamilla Heddeland Instefjord, Hilde Elshaug, Garcia Llorente Ignacio, Jon Bråte, Engebretsen Serina Beate, Pedersen Benedikte Nevjen, Debech Nadia, Atiya R Ali, Marie Paulsen Madsen, Rasmus Riis Kopperud, Hilde Vollan, Karoline Bragstad, Olav Hungnes                                                                                                                                                                                                                                                                                                                                                                                                                                                                                                                                                                                                                                                                                                                                                             |
| EPI_ISL_1547613                                                                                                                                                                                                                                                                                                                                                                                                                                                                                                                                                                                                                                                                                                                                                                                                                                                                                                                                                                                                                                                                                                                                                                                                                                                                                                                                                                                                                                                                                                                                                                                                                                                                                                                                                                                                                                                                                                                                                                                                                                                                                                                                                                                                                                                                                                                                                                                                                                                                                                                                                                                                                                                                                                                                                                                                                                                                                                                                                                                                                                                                                                                                                                                                                                                                                                                                                                                                                                                                                                                                                                                                                                                                                                                                                                                                                                                                                                                                                                                                                                                                                                                                                                                                                                                                                                                                                                                                                                                                                                                                                                                                                                                                                                                                                                                                                                                                                                                                                                                                                                                                                                                                                                                                                                                                                                                                                                                                                                                                                                                                                                                                                                                                                                                                                                                                                                                                                                                                                                                                                                                                                                                                                                                                                                                                                                                                                                                                                                                                                                                                                                                                                                                                                                                                                                                                                                                                                                                                                                                                                                                                                                                                                                                                                                                                                                                                                                                                                                                                                                                             | Medical Microbiology Unit, Department for Laboratory Medicine, Drammen Hospital, Vestre Viken Health Trust,    | Norwegian Institute of Public Health, Department of Virology                                                                                                                                                                                                                                                                                                                                                                                                                                                                                                                                                                                                                                                                                                                                                                                                                                                                                                                                                                                    | Kathrine Stene-Johansen, Kamilla Heddeland Instefjord, Hilde Elshaug, Garcia Llorente Ignacio, Jon Bråte, Engebretsen Serina Beate, Pedersen Benedikte Nevjen, Debech Nadia, Atiya R Ali, Marie Paulsen Madsen, Rasmus Riis Kopperud, Hilde Vollan, Karoline Bragstad, Olav Hungnes                                                                                                                                                                                                                                                                                                                                                                                                                                                                                                                                                                                                                                                                                                                                                             |
| EPI_ISL_1547677                                                                                                                                                                                                                                                                                                                                                                                                                                                                                                                                                                                                                                                                                                                                                                                                                                                                                                                                                                                                                                                                                                                                                                                                                                                                                                                                                                                                                                                                                                                                                                                                                                                                                                                                                                                                                                                                                                                                                                                                                                                                                                                                                                                                                                                                                                                                                                                                                                                                                                                                                                                                                                                                                                                                                                                                                                                                                                                                                                                                                                                                                                                                                                                                                                                                                                                                                                                                                                                                                                                                                                                                                                                                                                                                                                                                                                                                                                                                                                                                                                                                                                                                                                                                                                                                                                                                                                                                                                                                                                                                                                                                                                                                                                                                                                                                                                                                                                                                                                                                                                                                                                                                                                                                                                                                                                                                                                                                                                                                                                                                                                                                                                                                                                                                                                                                                                                                                                                                                                                                                                                                                                                                                                                                                                                                                                                                                                                                                                                                                                                                                                                                                                                                                                                                                                                                                                                                                                                                                                                                                                                                                                                                                                                                                                                                                                                                                                                                                                                                                                                             | Furst Medical Laboratory                                                                                       | Norwegian Institute of Public Health, Department of Virology                                                                                                                                                                                                                                                                                                                                                                                                                                                                                                                                                                                                                                                                                                                                                                                                                                                                                                                                                                                    | Kathrine Stene-Johansen, Kamilla Heddeland Instefjord, Hilde Elshaug, Garcia Llorente Ignacio, Jon Bråte, Engebretsen Serina Beate, Pedersen Benedikte Nevjen, Debech Nadia, Atiya R Ali, Marie Paulsen Madsen, Rasmus Riis Kopperud, Hilde Vollan, Karoline Bragstad, Olav Hungnes                                                                                                                                                                                                                                                                                                                                                                                                                                                                                                                                                                                                                                                                                                                                                             |
| EPI_ISL_1547708, EPI_ISL_1547735, EPI_ISL_1547748, EPI_ISL_1547765                                                                                                                                                                                                                                                                                                                                                                                                                                                                                                                                                                                                                                                                                                                                                                                                                                                                                                                                                                                                                                                                                                                                                                                                                                                                                                                                                                                                                                                                                                                                                                                                                                                                                                                                                                                                                                                                                                                                                                                                                                                                                                                                                                                                                                                                                                                                                                                                                                                                                                                                                                                                                                                                                                                                                                                                                                                                                                                                                                                                                                                                                                                                                                                                                                                                                                                                                                                                                                                                                                                                                                                                                                                                                                                                                                                                                                                                                                                                                                                                                                                                                                                                                                                                                                                                                                                                                                                                                                                                                                                                                                                                                                                                                                                                                                                                                                                                                                                                                                                                                                                                                                                                                                                                                                                                                                                                                                                                                                                                                                                                                                                                                                                                                                                                                                                                                                                                                                                                                                                                                                                                                                                                                                                                                                                                                                                                                                                                                                                                                                                                                                                                                                                                                                                                                                                                                                                                                                                                                                                                                                                                                                                                                                                                                                                                                                                                                                                                                                                                          | Microbiology Department, Laboratori Clínic Metropolitana Nord. Hospital Universitari Germans Trias i Pujol.    | Can Ruti SARS-CoV-2 Sequencing Hub (HUGTIP/IrsiCaixa/IGTP)                                                                                                                                                                                                                                                                                                                                                                                                                                                                                                                                                                                                                                                                                                                                                                                                                                                                                                                                                                                      | Marc Noguera-Julian, Pilar Armetol, Ignacio Blanco, Antoni E Bordoy, Francesc Català-Muller, Pere-Joan Cardona, Maria Casadellà, Cristina Casañ, Gemma Clara, Bonaventura Clotet, Cristina Esteban, Montserrat Giménez, Mercedes Guerrero, Anna Not, Roger Paredes, Mariona Parera, Verónica Saludes, Alba Sánchez, and Elisa Martró on behalf of the Can Ruti SARS-CoV-2 Sequencing Hub.                                                                                                                                                                                                                                                                                                                                                                                                                                                                                                                                                                                                                                                       |
| EPI_ISL_1547822                                                                                                                                                                                                                                                                                                                                                                                                                                                                                                                                                                                                                                                                                                                                                                                                                                                                                                                                                                                                                                                                                                                                                                                                                                                                                                                                                                                                                                                                                                                                                                                                                                                                                                                                                                                                                                                                                                                                                                                                                                                                                                                                                                                                                                                                                                                                                                                                                                                                                                                                                                                                                                                                                                                                                                                                                                                                                                                                                                                                                                                                                                                                                                                                                                                                                                                                                                                                                                                                                                                                                                                                                                                                                                                                                                                                                                                                                                                                                                                                                                                                                                                                                                                                                                                                                                                                                                                                                                                                                                                                                                                                                                                                                                                                                                                                                                                                                                                                                                                                                                                                                                                                                                                                                                                                                                                                                                                                                                                                                                                                                                                                                                                                                                                                                                                                                                                                                                                                                                                                                                                                                                                                                                                                                                                                                                                                                                                                                                                                                                                                                                                                                                                                                                                                                                                                                                                                                                                                                                                                                                                                                                                                                                                                                                                                                                                                                                                                                                                                                                                             | Laboratory of Clinical Microbiology, Virology and Bioemergencies, ASST Fatebenefratelli Sacco - Sacco Hospital | Laboratory of Clinical Microbiology, Virology and Bioemergencies, ASST Fatebenefratelli Sacco - Sacco Hospital                                                                                                                                                                                                                                                                                                                                                                                                                                                                                                                                                                                                                                                                                                                                                                                                                                                                                                                                  | Valeria Micheli, Alessandro Mancon, Alberto Rizzo, Fiorenza Bracchitta, Luca Rizzuto, Maria Rita Gismondo                                                                                                                                                                                                                                                                                                                                                                                                                                                                                                                                                                                                                                                                                                                                                                                                                                                                                                                                       |
| EPI_ISL_1548039                                                                                                                                                                                                                                                                                                                                                                                                                                                                                                                                                                                                                                                                                                                                                                                                                                                                                                                                                                                                                                                                                                                                                                                                                                                                                                                                                                                                                                                                                                                                                                                                                                                                                                                                                                                                                                                                                                                                                                                                                                                                                                                                                                                                                                                                                                                                                                                                                                                                                                                                                                                                                                                                                                                                                                                                                                                                                                                                                                                                                                                                                                                                                                                                                                                                                                                                                                                                                                                                                                                                                                                                                                                                                                                                                                                                                                                                                                                                                                                                                                                                                                                                                                                                                                                                                                                                                                                                                                                                                                                                                                                                                                                                                                                                                                                                                                                                                                                                                                                                                                                                                                                                                                                                                                                                                                                                                                                                                                                                                                                                                                                                                                                                                                                                                                                                                                                                                                                                                                                                                                                                                                                                                                                                                                                                                                                                                                                                                                                                                                                                                                                                                                                                                                                                                                                                                                                                                                                                                                                                                                                                                                                                                                                                                                                                                                                                                                                                                                                                                                                             | Montana Public Health Laboratory                                                                               | Montana Public Health Laboratory                                                                                                                                                                                                                                                                                                                                                                                                                                                                                                                                                                                                                                                                                                                                                                                                                                                                                                                                                                                                                | Joy Ritter, Michelle Mozer, Carrie Biskupiak, Deborah Gibson                                                                                                                                                                                                                                                                                                                                                                                                                                                                                                                                                                                                                                                                                                                                                                                                                                                                                                                                                                                    |
| EPI_ISL_1548117, EPI_ISL_1548138, EPI_ISL_1548151, EPI_ISL_1548154, EPI_ISL_1548156, EPI_ISL_1548161, EPI_ISL_1548164, EPI_ISL_1548165, EPI_ISL_1548170, EPI_ISL_1548188, EPI_ISL_1548208, EPI_ISL_1548209, EPI_ISL_1548213, EPI_ISL_1548214, EPI_ISL_1548217, EPI_ISL_1548218, EPI_ISL_1548219, EPI_ISL_1548222, EPI_ISL_1548223, EPI_ISL_1548226, EPI_ISL_1548231, EPI_ISL_1548236, EPI_ISL_1548241, EPI_ISL_1548243, EPI_ISL_1548244, EPI_ISL_1548263, EPI_ISL_1548269, EPI_ISL_1548272, EPI_ISL_1548274, EPI_ISL_1548284, EPI_ISL_1548286, EPI_ISL_1548305, EPI_ISL_1548333, EPI_ISL_1548380, EPI_ISL_1548383, EPI_ISL_1548396, EPI_ISL_1548424, EPI_ISL_1548441, EPI_ISL_1548445, EPI_ISL_1548474, EPI_ISL_1548477, EPI_ISL_1548485, EPI_ISL_1548505, EPI_ISL_1548633, EPI_ISL_1548636, EPI_ISL_1548699, EPI_ISL_1548749, EPI_ISL_1548761, EPI_ISL_1548858, EPI_ISL_1548917, EPI_ISL_1548952, EPI_ISL_1548953, EPI_ISL_1548956, EPI_ISL_1548957, EPI_ISL_1548958, EPI_ISL_1548965, EPI_ISL_1548970, EPI_ISL_1548972, EPI_ISL_1548973, EPI_ISL_1548976, EPI_ISL_1548979, EPI_ISL_1548984, EPI_ISL_1548985, EPI_ISL_1548993, EPI_ISL_1549012, EPI_ISL_1549013, EPI_ISL_1549019, EPI_ISL_1549020, EPI_ISL_1549021, EPI_ISL_1549023, EPI_ISL_1549036, EPI_ISL_1549038, EPI_ISL_1549046, EPI_ISL_1549054, EPI_ISL_1549065, EPI_ISL_1549066, EPI_ISL_1549079, EPI_ISL_1549082, EPI_ISL_1549151, EPI_ISL_1549173, EPI_ISL_1549175, EPI_ISL_1549189, EPI_ISL_1549201, EPI_ISL_1549212, EPI_ISL_1549222, EPI_ISL_1549227, EPI_ISL_1549305, EPI_ISL_1549315, EPI_ISL_1549339, EPI_ISL_1549377, EPI_ISL_1549379, EPI_ISL_1549380, EPI_ISL_1549464, EPI_ISL_1549506, EPI_ISL_1549533, EPI_ISL_1549535, EPI_ISL_1549558, EPI_ISL_1549561, EPI_ISL_1549604, EPI_ISL_1549610, EPI_ISL_1549632, EPI_ISL_1549635, EPI_ISL_1549637, EPI_ISL_1549645, EPI_ISL_1549650, EPI_ISL_1549656, EPI_ISL_1549663, EPI_ISL_1549675, EPI_ISL_1549676, EPI_ISL_1549770, EPI_ISL_1549772, EPI_ISL_1549776, EPI_ISL_1549780, EPI_ISL_1549783, EPI_ISL_1549785, EPI_ISL_1549786, EPI_ISL_1549788, EPI_ISL_1549794, EPI_ISL_1549804, EPI_ISL_1549826, EPI_ISL_1549844, EPI_ISL_1549849, EPI_ISL_1549861, EPI_ISL_1549890, EPI_ISL_1549915, EPI_ISL_1549917, EPI_ISL_1549918, EPI_ISL_1549920, EPI_ISL_1549921, EPI_ISL_1549924, EPI_ISL_1549927, EPI_ISL_1549928, EPI_ISL_1549929, EPI_ISL_1549931, EPI_ISL_1549938, EPI_ISL_1549940, EPI_ISL_1549942, EPI_ISL_1549949, EPI_ISL_1549950, EPI_ISL_1549951, EPI_ISL_1549952, EPI_ISL_1549988, EPI_ISL_1550003, EPI_ISL_1550006, EPI_ISL_1550015, EPI_ISL_1550034, EPI_ISL_1550040, EPI_ISL_1550043                                                                                                                                                                                                                                                                                                                                                                                                                                                                                                                                                                                                                                                                                                                                                                                                                                                                                                                                                                                                                                                                                                                                                                                                                                                                                                                                                                                                                                                                                                                                                                                                                                                                                                                                                                                                                                                                                                                                                                                                                                                                                                                                                                                                                                                                                                                                                                                                                                                                                                                                                                                                                                                                                                                                                                                                                                                                                                                                                                                                                                                                                                                                                                                                                                                                                                                                                                                                                                                                                                                                                                                                                                                                                                                                                                                                                                                                                                                                                                                                                                                                                                                                                                                                                                                                                                                                                                                                                                                                                                                                                                                                                                                                                                                                                                                                                                                                                                                          | Centers for Disease Control and Prevention Division of Viral Diseases, Pathogen Discovery                      | Dakota Howard, Dhvani Batra, Peter W. Cook, Kara Moser, Adrian Paskey, Jason Caravas, Benjamin Rambo-Martin, Shatavia Morrison, Christopher Gulvick, Scott Sammons, Yvette Unoaurnhii, Darlene Wagner, Matthew Schmerer, Mino Aggarwal, Eyad Almasri, Debbie Boles, Ayla Burns, Nuthawin Charoensri, Oren Cohen, Susan Countryman, Mary Ann Cristobal, Bobbi Croy, Suzanne Dale, Hrushikesh Deshmukh, Amanda Douglas, Vincent Drouillon, Marcia Eisenberg, Howard Engler, Rama Ghatti, Prashant Gupta, Susan Hicks, Jake Humphrey, Lax Iyer, Manoj Jain, Mohan Koll, Brian Krueger, Tim Kuphal, Stanley Letovsky, Michael Levandoski, Craig Lukasik, Jonathan Meltzer, Brian Norvell, Mindy Nye, Scott Parker, Christos Petropoulos, John Pruitt, Steven Ragan, Scott Ryan, Mike Sapeta, Jana Schroth, Suresh Babu Selvaraju, Goran Stevovic, Amanda Suchanek, Andrea Throop, Lyndon Tison, Thomas Urban, Joe Voshell, Kimberly Wagner, Jonathan Williams, Mary Williamson, Qian Zeng, Tricia Zwiefelhofer, Clinton R. Paden, Duncan MacCannell |                                                                                                                                                                                                                                                                                                                                                                                                                                                                                                                                                                                                                                                                                                                                                                                                                                                                                                                                                                                                                                                 |
| EPI_ISL_1550055                                                                                                                                                                                                                                                                                                                                                                                                                                                                                                                                                                                                                                                                                                                                                                                                                                                                                                                                                                                                                                                                                                                                                                                                                                                                                                                                                                                                                                                                                                                                                                                                                                                                                                                                                                                                                                                                                                                                                                                                                                                                                                                                                                                                                                                                                                                                                                                                                                                                                                                                                                                                                                                                                                                                                                                                                                                                                                                                                                                                                                                                                                                                                                                                                                                                                                                                                                                                                                                                                                                                                                                                                                                                                                                                                                                                                                                                                                                                                                                                                                                                                                                                                                                                                                                                                                                                                                                                                                                                                                                                                                                                                                                                                                                                                                                                                                                                                                                                                                                                                                                                                                                                                                                                                                                                                                                                                                                                                                                                                                                                                                                                                                                                                                                                                                                                                                                                                                                                                                                                                                                                                                                                                                                                                                                                                                                                                                                                                                                                                                                                                                                                                                                                                                                                                                                                                                                                                                                                                                                                                                                                                                                                                                                                                                                                                                                                                                                                                                                                                                                             | Department of Genetic Engineering and Biotechnology, Shahjalal University of Science and Technology            | Genomic Research Lab, BCSIR                                                                                                                                                                                                                                                                                                                                                                                                                                                                                                                                                                                                                                                                                                                                                                                                                                                                                                                                                                                                                     | Md. Murshed Hasan Sarkar, Abu Sayeed Mohammad Mahmud, Mohammad Samir Uzzaman, Eshrar Osman, Md. Ahasan Habib, Shahina Akter, Tanjina Akhter Banu, Barna Goswami, Iffat Jahan, Md. Saddam Hossain, Mohammad Mohi Uddin, Md. Kamrul Islam, Md. Shamsul Haque Proadhan, Md. Hammadul Hoque, G. M. Nurnabi Azad Jewel, Md. Nazmul Hasan, Md. Fahmid Hossain Bhuiyan, Md. Asrafu Jahan, Ajit Ghosh, Md. Akkas Ali, Md. Salim Khan                                                                                                                                                                                                                                                                                                                                                                                                                                                                                                                                                                                                                    |
| EPI_ISL_1550100, EPI_ISL_1550105, EPI_ISL_1550179, EPI_ISL_1550193, EPI_ISL_1550205, EPI_ISL_1550210, EPI_ISL_1550224, EPI_ISL_1550342, EPI_ISL_1550343                                                                                                                                                                                                                                                                                                                                                                                                                                                                                                                                                                                                                                                                                                                                                                                                                                                                                                                                                                                                                                                                                                                                                                                                                                                                                                                                                                                                                                                                                                                                                                                                                                                                                                                                                                                                                                                                                                                                                                                                                                                                                                                                                                                                                                                                                                                                                                                                                                                                                                                                                                                                                                                                                                                                                                                                                                                                                                                                                                                                                                                                                                                                                                                                                                                                                                                                                                                                                                                                                                                                                                                                                                                                                                                                                                                                                                                                                                                                                                                                                                                                                                                                                                                                                                                                                                                                                                                                                                                                                                                                                                                                                                                                                                                                                                                                                                                                                                                                                                                                                                                                                                                                                                                                                                                                                                                                                                                                                                                                                                                                                                                                                                                                                                                                                                                                                                                                                                                                                                                                                                                                                                                                                                                                                                                                                                                                                                                                                                                                                                                                                                                                                                                                                                                                                                                                                                                                                                                                                                                                                                                                                                                                                                                                                                                                                                                                                                                     | Laboratory Corporation of America                                                                              | Centers for Disease Control and Prevention Division of Viral Diseases, Pathogen Discovery                                                                                                                                                                                                                                                                                                                                                                                                                                                                                                                                                                                                                                                                                                                                                                                                                                                                                                                                                       | Dakota Howard, Dhvani Batra, Peter W. Cook, Kara Moser, Adrian Paskey, Jason Caravas, Benjamin Rambo-Martin, Shatavia Morrison, Christopher Gulvick, Scott Sammons, Yvette Unoaurnhii, Darlene Wagner, Matthew Schmerer, Mino Aggarwal, Eyad Almasri, Debbie Boles, Ayla Burns, Nuthawin Charoensri, Oren Cohen, Susan Countryman, Mary Ann Cristobal, Bobbi Croy, Suzanne Dale, Hrushikesh Deshmukh, Amanda Douglas, Vincent Drouillon, Marcia Eisenberg, Howard Engler, Rama Ghatti, Prashant Gupta, Susan Hicks, Jake Humphrey, Lax Iyer, Manoj Jain, Mohan Koll, Brian Krueger, Tim Kuphal, Stanley Letovsky, Michael Levandoski, Craig Lukasik, Jonathan Meltzer, Brian Norvell, Mindy Nye, Scott Parker, Christos Petropoulos, John Pruitt, Steven Ragan, Scott Ryan, Mike Sapeta, Jana Schroth, Suresh Babu Selvaraju, Goran Stevovic, Amanda Suchanek, Andrea Throop, Lyndon Tison, Thomas Urban, Joe Voshell, Kimberly Wagner, Jonathan Williams, Mary Williamson, Qian Zeng, Tricia Zwiefelhofer, Clinton R. Paden, Duncan MacCannell |
| EPI_ISL_1550397, EPI_ISL_1550431, EPI_ISL_1550433, EPI_ISL_1550435, EPI_ISL_1550436, EPI_ISL_1550437, EPI_ISL_1550457, EPI_ISL_1550467, EPI_ISL_1550468, EPI_ISL_1550472, EPI_ISL_1550479, EPI_ISL_1550488, EPI_ISL_1550490, EPI_ISL_1550499, EPI_ISL_1550501, EPI_ISL_1550505, EPI_ISL_1550506, EPI_ISL_1550617, EPI_ISL_1550643, EPI_ISL_1550651, EPI_ISL_1550662, EPI_ISL_1550668, EPI_ISL_1550683, EPI_ISL_1550684, EPI_ISL_1550690, EPI_ISL_1550694, EPI_ISL_1550720, EPI_ISL_1550734, EPI_ISL_1550741, EPI_ISL_1550746, EPI_ISL_1550756, EPI_ISL_1550759, EPI_ISL_1550770, EPI_ISL_1550775, EPI_ISL_1550816, EPI_ISL_1550826, EPI_ISL_1550829, EPI_ISL_1550833, EPI_ISL_1550835, EPI_ISL_1550873, EPI_ISL_1550877, EPI_ISL_1550963, EPI_ISL_1550965, EPI_ISL_1550968, EPI_ISL_1550973, EPI_ISL_1550987, EPI_ISL_1551026, EPI_ISL_1551028, EPI_ISL_1551037, EPI_ISL_1551046, EPI_ISL_1551081, EPI_ISL_1551106, EPI_ISL_1551108, EPI_ISL_1551116, EPI_ISL_1551120, EPI_ISL_1551127, EPI_ISL_1551133, EPI_ISL_1551138, EPI_ISL_1551147, EPI_ISL_1551164, EPI_ISL_1551167, EPI_ISL_1551173, EPI_ISL_1551174, EPI_ISL_1551179, EPI_ISL_1551200, EPI_ISL_1551207, EPI_ISL_1551216, EPI_ISL_1551228, EPI_ISL_1551228, EPI_ISL_1551230, EPI_ISL_1551231, EPI_ISL_1551231, EPI_ISL_1551233, EPI_ISL_1551248, EPI_ISL_1551281, EPI_ISL_1551291, EPI_ISL_1551323, EPI_ISL_1551344, EPI_ISL_1551363, EPI_ISL_1551389, EPI_ISL_1551392, EPI_ISL_1551394, EPI_ISL_1551411, EPI_ISL_1551448, EPI_ISL_1551473, EPI_ISL_1551492, EPI_ISL_1551494, EPI_ISL_1551499, EPI_ISL_1551511, EPI_ISL_1551515, EPI_ISL_1551517, EPI_ISL_1551532, EPI_ISL_1551539, EPI_ISL_1551557, EPI_ISL_1551569, EPI_ISL_1551590, EPI_ISL_1551623, EPI_ISL_1551631                                                                                                                                                                                                                                                                                                                                                                                                                                                                                                                                                                                                                                                                                                                                                                                                                                                                                                                                                                                                                                                                                                                                                                                                                                                                                                                                                                                                                                                                                                                                                                                                                                                                                                                                                                                                                                                                                                                                                                                                                                                                                                                                                                                                                                                                                                                                                                                                                                                                                                                                                                                                                                                                                                                                                                                                                                                                                                                                                                                                                                                                                                                                                                                                                                                                                                                                                                                                                                                                                                                                                                                                                                                                                                                                                                                                                                                                                                                                                                                                                                                                                                                                                                                                                                                                                                                                                                                                                                                                                                                                                                                                                                                                                                                                                                                                                                                                                                                                                                                                                                                                                                                                                                                                                                                                                                                                                                                                                                                                                                                                                                                                                                                                                                                                                                                                            | Centers for Disease Control and Prevention Division of Viral Diseases, Pathogen Discovery                      | Dakota Howard, Dhvani Batra, Peter W. Cook, Kara Moser, Adrian Paskey, Jason Caravas, Benjamin Rambo-Martin, Shatavia Morrison, Christopher Gulvick, Scott Sammons, Yvette Unoaurnhii, Darlene Wagner, Matthew Schmerer, Cyndi Clark, Patricia Campbell, Rob Case, Vikramisha Ghorpade, Holly Houdeshell, Ola Kvalvaag, Dillon Nall, Ethan Sanders, Alec Vest, Shaun Westlund, Matthew Hardison, Clinton R. Paden, Duncan MacCannell                                                                                                                                                                                                                                                                                                                                                                                                                                                                                                                                                                                                            |                                                                                                                                                                                                                                                                                                                                                                                                                                                                                                                                                                                                                                                                                                                                                                                                                                                                                                                                                                                                                                                 |
| EPI_ISL_1551662, EPI_ISL_1551712, EPI_ISL_1551717, EPI_ISL_1551723, EPI_ISL_1551725, EPI_ISL_1551730, EPI_ISL_1551738, EPI_ISL_1551745, EPI_ISL_1551754, EPI_ISL_1551758, EPI_ISL_1551760, EPI_ISL_1551763, EPI_ISL_1551765, EPI_ISL_1551766, EPI_ISL_1551772                                                                                                                                                                                                                                                                                                                                                                                                                                                                                                                                                                                                                                                                                                                                                                                                                                                                                                                                                                                                                                                                                                                                                                                                                                                                                                                                                                                                                                                                                                                                                                                                                                                                                                                                                                                                                                                                                                                                                                                                                                                                                                                                                                                                                                                                                                                                                                                                                                                                                                                                                                                                                                                                                                                                                                                                                                                                                                                                                                                                                                                                                                                                                                                                                                                                                                                                                                                                                                                                                                                                                                                                                                                                                                                                                                                                                                                                                                                                                                                                                                                                                                                                                                                                                                                                                                                                                                                                                                                                                                                                                                                                                                                                                                                                                                                                                                                                                                                                                                                                                                                                                                                                                                                                                                                                                                                                                                                                                                                                                                                                                                                                                                                                                                                                                                                                                                                                                                                                                                                                                                                                                                                                                                                                                                                                                                                                                                                                                                                                                                                                                                                                                                                                                                                                                                                                                                                                                                                                                                                                                                                                                                                                                                                                                                                                               | Quest Diagnostics Incorporated                                                                                 | Centers for Disease Control and Prevention Division of Viral Diseases, Pathogen Discovery                                                                                                                                                                                                                                                                                                                                                                                                                                                                                                                                                                                                                                                                                                                                                                                                                                                                                                                                                       | Peter W. Cook, Dakota Howard, Dhvani Batra, Ben L. Rambo-Martin, S. H. Rosenthal, A. Gerasimova, R. M. Kagan, B. Anderson, M. Hua, Y. Liu, L.E. Bernstein, K.E. Livingston, A. Perez, I. A. Shlyakhter, R. V. Rolando, R. Owen, P. Tanpaiboon, F. Labawan, Clinton R. Paden, Suxiang Tong, Duncan MacCannell                                                                                                                                                                                                                                                                                                                                                                                                                                                                                                                                                                                                                                                                                                                                    |
| EPI_ISL_1551776, EPI_ISL_1551782, EPI_ISL_1551806, EPI_ISL_1551808, EPI_ISL_1551813, EPI_ISL_1551823, EPI_ISL_1551828, EPI_ISL_1551839, EPI_ISL_1551854, EPI_ISL_1551856, EPI_ISL_1551860, EPI_ISL_1551868, EPI_ISL_1551877, EPI_ISL_1551883, EPI_ISL_1551965, EPI_ISL_1551971, EPI_ISL_1551972, EPI_ISL_1551980, EPI_ISL_1551981, EPI_ISL_1552001, EPI_ISL_1552011, EPI_ISL_1552012, EPI_ISL_1552051, EPI_ISL_1552055, EPI_ISL_1552107, EPI_ISL_1552182, EPI_ISL_1552187, EPI_ISL_1552190, EPI_ISL_1552198, EPI_ISL_1552201, EPI_ISL_1552205, EPI_ISL_1552214, EPI_ISL_1552216, EPI_ISL_1552221, EPI_ISL_1552230, EPI_ISL_1552237, EPI_ISL_1552255, EPI_ISL_1552257, EPI_ISL_1552262, EPI_ISL_1552272, EPI_ISL_1552277, EPI_ISL_1552278, EPI_ISL_1552282, EPI_ISL_1552291, EPI_ISL_1552295, EPI_ISL_1552321, EPI_ISL_1552342, EPI_ISL_1552349, EPI_ISL_1552353, EPI_ISL_1552358, EPI_ISL_1552362, EPI_ISL_1552364, EPI_ISL_1552365, EPI_ISL_1552368, EPI_ISL_1552371, EPI_ISL_1552379, EPI_ISL_1552382, EPI_ISL_1552385, EPI_ISL_1552390, EPI_ISL_1552394, EPI_ISL_1552395, EPI_ISL_1552400, EPI_ISL_1552402, EPI_ISL_1552403, EPI_ISL_1552408, EPI_ISL_1552410, EPI_ISL_1552412, EPI_ISL_1552413, EPI_ISL_1552414, EPI_ISL_1552415, EPI_ISL_1552416, EPI_ISL_1552417, EPI_ISL_1552418, EPI_ISL_1552419, EPI_ISL_1552420, EPI_ISL_1552421, EPI_ISL_1552422, EPI_ISL_1552423, EPI_ISL_1552424, EPI_ISL_1552425, EPI_ISL_1552426, EPI_ISL_1552427, EPI_ISL_1552428, EPI_ISL_1552429, EPI_ISL_1552430, EPI_ISL_1552431, EPI_ISL_1552432, EPI_ISL_1552433, EPI_ISL_1552434, EPI_ISL_1552435, EPI_ISL_1552436, EPI_ISL_1552437, EPI_ISL_1552438, EPI_ISL_1552439, EPI_ISL_1552440, EPI_ISL_1552441, EPI_ISL_1552442, EPI_ISL_1552443, EPI_ISL_1552444, EPI_ISL_1552445, EPI_ISL_1552446, EPI_ISL_1552447, EPI_ISL_1552448, EPI_ISL_1552449, EPI_ISL_1552450, EPI_ISL_1552451, EPI_ISL_1552452, EPI_ISL_1552453, EPI_ISL_1552454, EPI_ISL_1552455, EPI_ISL_1552456, EPI_ISL_1552457, EPI_ISL_1552458, EPI_ISL_1552459, EPI_ISL_1552460, EPI_ISL_1552461, EPI_ISL_1552462, EPI_ISL_1552463, EPI_ISL_1552464, EPI_ISL_1552465, EPI_ISL_1552466, EPI_ISL_1552467, EPI_ISL_1552468, EPI_ISL_1552469, EPI_ISL_1552470, EPI_ISL_1552471, EPI_ISL_1552472, EPI_ISL_1552473, EPI_ISL_1552474, EPI_ISL_1552475, EPI_ISL_1552476, EPI_ISL_1552477, EPI_ISL_1552478, EPI_ISL_1552479, EPI_ISL_1552480, EPI_ISL_1552481, EPI_ISL_1552482, EPI_ISL_1552483, EPI_ISL_1552484, EPI_ISL_1552485, EPI_ISL_1552486, EPI_ISL_1552487, EPI_ISL_1552488, EPI_ISL_1552489, EPI_ISL_1552490, EPI_ISL_1552491, EPI_ISL_1552492, EPI_ISL_1552493, EPI_ISL_1552494, EPI_ISL_1552495, EPI_ISL_1552496, EPI_ISL_1552497, EPI_ISL_1552498, EPI_ISL_1552499, EPI_ISL_1552500, EPI_ISL_1552501, EPI_ISL_1552502, EPI_ISL_1552503, EPI_ISL_1552504, EPI_ISL_1552505, EPI_ISL_1552506, EPI_ISL_1552507, EPI_ISL_1552508, EPI_ISL_1552509, EPI_ISL_1552510, EPI_ISL_1552511, EPI_ISL_1552512, EPI_ISL_1552513, EPI_ISL_1552514, EPI_ISL_1552515, EPI_ISL_1552516, EPI_ISL_1552517, EPI_ISL_1552518, EPI_ISL_1552519, EPI_ISL_1552520, EPI_ISL_1552521, EPI_ISL_1552522, EPI_ISL_1552523, EPI_ISL_1552524, EPI_ISL_1552525, EPI_ISL_1552526, EPI_ISL_1552527, EPI_ISL_1552528, EPI_ISL_1552529, EPI_ISL_1552530, EPI_ISL_1552531, EPI_ISL_1552532, EPI_ISL_1552533, EPI_ISL_1552534, EPI_ISL_1552535, EPI_ISL_1552536, EPI_ISL_1552537, EPI_ISL_1552538, EPI_ISL_1552539, EPI_ISL_1552540, EPI_ISL_1552541, EPI_ISL_1552542, EPI_ISL_1552543, EPI_ISL_1552544, EPI_ISL_1552545, EPI_ISL_1552546, EPI_ISL_1552547, EPI_ISL_1552548, EPI_ISL_1552549, EPI_ISL_1552550, EPI_ISL_1552551, EPI_ISL_1552552, EPI_ISL_1552553, EPI_ISL_1552554, EPI_ISL_1552555, EPI_ISL_1552556, EPI_ISL_1552557, EPI_ISL_1552558, EPI_ISL_1552559, EPI_ISL_1552560, EPI_ISL_1552561, EPI_ISL_1552562, EPI_ISL_1552563, EPI_ISL_1552564, EPI_ISL_1552565, EPI_ISL_1552566, EPI_ISL_1552567, EPI_ISL_1552568, EPI_ISL_1552569, EPI_ISL_1552570, EPI_ISL_1552571, EPI_ISL_1552572, EPI_ISL_1552573, EPI_ISL_1552574, EPI_ISL_1552575, EPI_ISL_1552576, EPI_ISL_1552577, EPI_ISL_1552578, EPI_ISL_1552579, EPI_ISL_1552580, EPI_ISL_1552581, EPI_ISL_1552582, EPI_ISL_1552583, EPI_ISL_1552584, EPI_ISL_1552585, EPI_ISL_1552586, EPI_ISL_1552587, EPI_ISL_1552588, EPI_ISL_1552589, EPI_ISL_1552590, EPI_ISL_1552591, EPI_ISL_1552592, EPI_ISL_1552593, EPI_ISL_1552594, EPI_ISL_1552595, EPI_ISL_1552596, EPI_ISL_1552597, EPI_ISL_1552598, EPI_ISL_1552599, EPI_ISL_1552600, EPI_ISL_1552601, EPI_ISL_1552602, EPI_ISL_1552603, EPI_ISL_1552604, EPI_ISL_1552605, EPI_ISL_1552606, EPI_ISL_1552607, EPI_ISL_1552608, EPI_ISL_1552609, EPI_ISL_1552610, EPI_ISL_1552611, EPI_ISL_1552612, EPI_ISL_1552613, EPI_ISL_1552614, EPI_ISL_1552615, EPI_ISL_1552616, EPI_ISL_1552617, EPI_ISL_1552618, EPI_ISL_1552619, EPI_ISL_1552620, EPI_ISL_1552621, EPI_ISL_1552622, EPI_ISL_1552623, EPI_ISL_1552624, EPI_ISL_1552625, EPI_ISL_1552626, EPI_ISL_1552627, EPI_ISL_1552628, EPI_ISL_1552629, EPI_ISL_1552630, EPI_ISL_1552631, EPI_ISL_1552632, EPI_ISL_1552633, EPI_ISL_1552634, EPI_ISL_1552635, EPI_ISL_1552636, EPI_ISL_1552637, EPI_ISL_1552638, EPI_ISL_1552639, EPI_ISL_1552640, EPI_ISL_1552641, EPI_ISL_1552642, EPI_ISL_1552643, EPI_ISL_1552644, EPI_ISL_1552645, EPI_ISL_1552646, EPI_ISL_1552647, EPI_ISL_1552648, EPI_ISL_1552649, EPI_ISL_1552650, EPI_ISL_1552651, EPI_ISL_1552652, EPI_ISL_1552653, EPI_ISL_1552654, EPI_ISL_1552655, EPI_ISL_1552656, EPI_ISL_1552657, EPI_ISL_1552658, EPI_ISL_1552659, EPI_ISL_1552660, EPI_ISL_1552661, EPI_ISL_1552662, EPI_ISL_1552663, EPI_ISL_1552664, EPI_ISL_1552665, EPI_ISL_1552666, EPI_ISL_1552667, EPI_ISL_1552668, EPI_ISL_1552669, EPI_ISL_1552670, EPI_ISL_1552671, EPI_ISL_1552672, EPI_ISL_1552673, EPI_ISL_1552674, EPI_ISL_1552675, EPI_ISL_1552676, EPI_ISL_1552677, EPI_ISL_1552678, EPI_ISL_1552679, EPI_ISL_1552680, EPI_ISL_1552681, EPI_ISL_1552682, EPI_ISL_1552683, EPI_ISL_1552684, EPI_ISL_1552685, EPI_ISL_1552686, EPI_ISL_1552687, EPI_ISL_1552688, EPI_ISL_1552689, EPI_ISL_1552690, EPI_ISL_1552691, EPI_ISL_1552692, EPI_ISL_1552693, EPI_ISL_1552694, EPI_ISL_1552695, EPI_ISL_1552696, EPI_ISL_1552697, EPI_ISL_1552698, EPI_ISL_1552699, EPI_ISL_1552700, EPI_ISL_1552701, EPI_ISL_1552702, EPI_ISL_1552703, EPI_ISL_1552704, EPI_ISL_1552705, EPI_ISL_1552706, EPI_ISL_1552707, EPI_ISL_1552708, EPI_ISL_1552709, EPI_ISL_1552710, EPI_ISL_1552711, EPI_ISL_1552712, EPI_ISL_1552713, EPI_ISL_1552714, EPI_ISL_1552715, EPI_ISL_1552716, EPI_ISL_1552717, EPI_ISL_1552718, EPI_ISL_1552719, EPI_ISL_1552720, EPI_ISL_1552721, EPI_ISL_1552722, EPI_ISL_1552723, EPI_ISL_1552724, EPI_ISL_1552725, EPI_ISL_1552726, EPI_ISL_1552727, EPI_ISL_1552728, EPI_ISL_1552729, EPI_ISL_1552730, EPI_ISL_1552731, EPI_ISL_1552732, EPI_ISL_1552733, EPI_ISL_1552734, EPI_ISL_1552735, EPI_ISL_1552736, EPI_ISL_1552737, EPI_ISL_1552738, EPI_ISL_1552739, EPI_ISL_1552740, EPI_ISL_1552741, EPI_ISL_1552742, EPI_ISL_1552743, EPI_ISL_1552744, EPI_ISL_1552745, EPI_ISL_1552746, EPI_ISL_1552747, EPI_ISL_1552748, EPI_ISL_1552749, EPI_ISL_1552750, EPI_ISL_1552751, EPI_ISL_1552752, EPI_ISL_1552753, EPI_ISL_1552754, EPI_ISL_1552755, EPI_ISL_1552756, EPI_ISL_1552757, EPI_ISL_1552758, EPI_ISL_1552759, EPI_ISL_1552760, EPI_ISL_1552761, EPI_ISL_1552762, EPI_ISL_1552763, EPI_ISL_1552764, EPI_ISL_1552765, EPI_ISL_1552766, EPI_ISL_1552767, EPI_ISL_1552768, EPI_ISL_1552769, EPI_ISL_1552770, EPI_ISL_1552771, E |                                                                                                                |                                                                                                                                                                                                                                                                                                                                                                                                                                                                                                                                                                                                                                                                                                                                                                                                                                                                                                                                                                                                                                                 |                                                                                                                                                                                                                                                                                                                                                                                                                                                                                                                                                                                                                                                                                                                                                                                                                                                                                                                                                                                                                                                 |

|                                                                                                                                                                                                                                                                                                                                                                                                                                                                                                                                                                                                                                                                                                                                                                                                                                                                                                                                                                                                                                                                                                                                                                                                                                                                                                                                                                                                                                                                                                                                                                                                                                                                                                                                                                                                                                                                                                                                                                                                                                                                                                                                                                                                                                                                                                                                                                                                                                                                                                                                                                 |                                                                                                     |                                                                                                                                                  |                                                                                                                                                                                                                                                                                                                                                                                                                                                                                                                                                                                                                                                                                                                         |                                                                                                                                                                                                                                                                                                                                                                                                                                                                                                                                                                                                                                                                                                                         |
|-----------------------------------------------------------------------------------------------------------------------------------------------------------------------------------------------------------------------------------------------------------------------------------------------------------------------------------------------------------------------------------------------------------------------------------------------------------------------------------------------------------------------------------------------------------------------------------------------------------------------------------------------------------------------------------------------------------------------------------------------------------------------------------------------------------------------------------------------------------------------------------------------------------------------------------------------------------------------------------------------------------------------------------------------------------------------------------------------------------------------------------------------------------------------------------------------------------------------------------------------------------------------------------------------------------------------------------------------------------------------------------------------------------------------------------------------------------------------------------------------------------------------------------------------------------------------------------------------------------------------------------------------------------------------------------------------------------------------------------------------------------------------------------------------------------------------------------------------------------------------------------------------------------------------------------------------------------------------------------------------------------------------------------------------------------------------------------------------------------------------------------------------------------------------------------------------------------------------------------------------------------------------------------------------------------------------------------------------------------------------------------------------------------------------------------------------------------------------------------------------------------------------------------------------------------------|-----------------------------------------------------------------------------------------------------|--------------------------------------------------------------------------------------------------------------------------------------------------|-------------------------------------------------------------------------------------------------------------------------------------------------------------------------------------------------------------------------------------------------------------------------------------------------------------------------------------------------------------------------------------------------------------------------------------------------------------------------------------------------------------------------------------------------------------------------------------------------------------------------------------------------------------------------------------------------------------------------|-------------------------------------------------------------------------------------------------------------------------------------------------------------------------------------------------------------------------------------------------------------------------------------------------------------------------------------------------------------------------------------------------------------------------------------------------------------------------------------------------------------------------------------------------------------------------------------------------------------------------------------------------------------------------------------------------------------------------|
| EPI_ISL_1552408, EPI_ISL_1552508, EPI_ISL_1552602, EPI_ISL_1552721, EPI_ISL_1552743, EPI_ISL_1552768, EPI_ISL_1552781, EPI_ISL_1552828, EPI_ISL_1552918, EPI_ISL_1552941, EPI_ISL_1553024, EPI_ISL_1553037, EPI_ISL_1553038, EPI_ISL_1553056, EPI_ISL_1553058, EPI_ISL_1553064, EPI_ISL_1553070, EPI_ISL_1553071, EPI_ISL_1553075, EPI_ISL_1553076, EPI_ISL_1553079, EPI_ISL_1553082, EPI_ISL_1553092, EPI_ISL_1553114, EPI_ISL_1553122, EPI_ISL_1553130, EPI_ISL_1553139, EPI_ISL_1553145, EPI_ISL_1553497, EPI_ISL_1553157, EPI_ISL_1553166                                                                                                                                                                                                                                                                                                                                                                                                                                                                                                                                                                                                                                                                                                                                                                                                                                                                                                                                                                                                                                                                                                                                                                                                                                                                                                                                                                                                                                                                                                                                                                                                                                                                                                                                                                                                                                                                                                                                                                                                                   | Quest Diagnostics Incorporated                                                                      | Centers for Disease Control and Prevention Division of Viral Diseases, Pathogen Discovery                                                        | Dakota Howard, Dhvani Batra, Peter W. Cook, Kara Moser, Adrian Paskey, Jason Caravas, Benjamin Rambo-Martin, Shatavia Morrison, Christopher Gulvick, Scott Sammons, Yvette Unoarumhi, Darlene Wagner, Matthew Schmerer, S. H. Rosenthal, A. Gerasimova, R. M. Kagan, B. Anderson, M. Hua, Y. Liu, L.E. Bernstein, K.E. Livingston, A. Perez, I. A. Shlyakhter, R. V. Rolando, R. Owen, P. Tanpaiboon, F. Lacbawan, Clinton R. Paden, Duncan MacCannell                                                                                                                                                                                                                                                                  |                                                                                                                                                                                                                                                                                                                                                                                                                                                                                                                                                                                                                                                                                                                         |
| see above                                                                                                                                                                                                                                                                                                                                                                                                                                                                                                                                                                                                                                                                                                                                                                                                                                                                                                                                                                                                                                                                                                                                                                                                                                                                                                                                                                                                                                                                                                                                                                                                                                                                                                                                                                                                                                                                                                                                                                                                                                                                                                                                                                                                                                                                                                                                                                                                                                                                                                                                                       | Quest Diagnostics Incorporated                                                                      | Centers for Disease Control and Prevention Division of Viral Diseases, Pathogen Discovery                                                        | Dakota Howard, Dhvani Batra, Peter W. Cook, Kara Moser, Adrian Paskey, Jason Caravas, Benjamin Rambo-Martin, Shatavia Morrison, Christopher Gulvick, Scott Sammons, Yvette Unoarumhi, Darlene Wagner, Matthew Schmerer, Eileen de Feo, Jan Antico, Christine Tran, Matthew Tolentino, Shannon Wickline, Kim Gietzen, Brad Sickler, Jingtao Liu, Eric Allen, Phil Febbo, Nicole L. Washington, Sherry White, Geraint Lavan, Kelly Schiabor Barrett, Elizabeth Cirulli, Alexandre Bolze, Ary Ascencio, Charlotte Rivera-Garcia, Ryan Cho, Jason Nguyen, Simon Wang, Jimmy Ramirez, Tyler Cassens, Efrén Sandoval, Magnus Isaksson, William Lee, David Becker, Marc Laurent, James Lu, Clinton R. Paden, Duncan MacCannell |                                                                                                                                                                                                                                                                                                                                                                                                                                                                                                                                                                                                                                                                                                                         |
| EPI_ISL_1553268, EPI_ISL_1553433, EPI_ISL_1553461, EPI_ISL_1553598, EPI_ISL_1553603, EPI_ISL_1553614, EPI_ISL_1553676, EPI_ISL_1553678, EPI_ISL_1553789, EPI_ISL_1553866, EPI_ISL_1553968, EPI_ISL_1554013, EPI_ISL_1554048, EPI_ISL_1554067, EPI_ISL_1554114, EPI_ISL_1554119, EPI_ISL_1554209, EPI_ISL_1554215, EPI_ISL_1554217, EPI_ISL_1554284, EPI_ISL_1554306, EPI_ISL_1554313, EPI_ISL_1554501, EPI_ISL_1554509, EPI_ISL_1554530, EPI_ISL_1554535, EPI_ISL_1554665, EPI_ISL_1554583, EPI_ISL_1554597, EPI_ISL_1554645, EPI_ISL_1554680, EPI_ISL_1554750                                                                                                                                                                                                                                                                                                                                                                                                                                                                                                                                                                                                                                                                                                                                                                                                                                                                                                                                                                                                                                                                                                                                                                                                                                                                                                                                                                                                                                                                                                                                                                                                                                                                                                                                                                                                                                                                                                                                                                                                  | Helix/Illumina                                                                                      | Centers for Disease Control and Prevention Division of Viral Diseases, Pathogen Discovery                                                        | Dakota Howard, Dhvani Batra, Peter W. Cook, Kara Moser, Adrian Paskey, Jason Caravas, Benjamin Rambo-Martin, Shatavia Morrison, Christopher Gulvick, Scott Sammons, Yvette Unoarumhi, Darlene Wagner, Matthew Schmerer, Eileen de Feo, Jan Antico, Christine Tran, Matthew Tolentino, Shannon Wickline, Kim Gietzen, Brad Sickler, Jingtao Liu, Eric Allen, Phil Febbo, Nicole L. Washington, Sherry White, Geraint Lavan, Kelly Schiabor Barrett, Elizabeth Cirulli, Alexandre Bolze, Ary Ascencio, Charlotte Rivera-Garcia, Ryan Cho, Jason Nguyen, Simon Wang, Jimmy Ramirez, Tyler Cassens, Efrén Sandoval, Magnus Isaksson, William Lee, David Becker, Marc Laurent, James Lu, Clinton R. Paden, Duncan MacCannell |                                                                                                                                                                                                                                                                                                                                                                                                                                                                                                                                                                                                                                                                                                                         |
| EPI_ISL_1554890, EPI_ISL_1554895                                                                                                                                                                                                                                                                                                                                                                                                                                                                                                                                                                                                                                                                                                                                                                                                                                                                                                                                                                                                                                                                                                                                                                                                                                                                                                                                                                                                                                                                                                                                                                                                                                                                                                                                                                                                                                                                                                                                                                                                                                                                                                                                                                                                                                                                                                                                                                                                                                                                                                                                | Hospital                                                                                            | National Reference Center for Viruses of Respiratory Infections, Institut Pasteur, Paris                                                         | Marion Barbet, Sylvie Behillil, Méline Bizard, Angela Brisebarre, Camille Capel, Frédéric Lemoine, Corinne Maufrais, Christophe Malabat, Damien Mornico, Louise Lefrançois, Etienne Simon-Lorière, Vincent Enouf, Maud Vanpeene, Sylvie van der Werf, Leruez-Ville Marianne                                                                                                                                                                                                                                                                                                                                                                                                                                             |                                                                                                                                                                                                                                                                                                                                                                                                                                                                                                                                                                                                                                                                                                                         |
| EPI_ISL_1554926, EPI_ISL_1554928                                                                                                                                                                                                                                                                                                                                                                                                                                                                                                                                                                                                                                                                                                                                                                                                                                                                                                                                                                                                                                                                                                                                                                                                                                                                                                                                                                                                                                                                                                                                                                                                                                                                                                                                                                                                                                                                                                                                                                                                                                                                                                                                                                                                                                                                                                                                                                                                                                                                                                                                | Hospital                                                                                            | National Reference Center for Viruses of Respiratory Infections, Institut Pasteur, Paris                                                         | Marion Barbet, Sylvie Behillil, Méline Bizard, Angela Brisebarre, Camille Capel, Frédéric Lemoine, Corinne Maufrais, Christophe Malabat, Damien Mornico, Louise Lefrançois, Etienne Simon-Lorière, Vincent Enouf, Maud Vanpeene, Sylvie van der Werf, Guinand Jérôme                                                                                                                                                                                                                                                                                                                                                                                                                                                    |                                                                                                                                                                                                                                                                                                                                                                                                                                                                                                                                                                                                                                                                                                                         |
| EPI_ISL_1554967, EPI_ISL_1554971, EPI_ISL_1554972, EPI_ISL_1554992, EPI_ISL_1555028, EPI_ISL_1555033, EPI_ISL_1555076, EPI_ISL_1555094, EPI_ISL_1555096, EPI_ISL_1555111, EPI_ISL_1555131, EPI_ISL_1555140, EPI_ISL_1555149, EPI_ISL_1555231, EPI_ISL_1555267, EPI_ISL_1555277, EPI_ISL_1555309, EPI_ISL_1555310, EPI_ISL_1555328, EPI_ISL_1555334, EPI_ISL_1555336, EPI_ISL_1555371, EPI_ISL_1555388, EPI_ISL_1555464, EPI_ISL_1555592, EPI_ISL_1555593, EPI_ISL_1555597, EPI_ISL_1555622, EPI_ISL_1555654, EPI_ISL_1555689, EPI_ISL_1555737, EPI_ISL_1555746, EPI_ISL_1555757, EPI_ISL_1555783, EPI_ISL_1555914, EPI_ISL_1555924, EPI_ISL_1555927, EPI_ISL_1555934, EPI_ISL_1556053, EPI_ISL_1556085, EPI_ISL_1556089, EPI_ISL_1556097, EPI_ISL_1556118, EPI_ISL_1556148, EPI_ISL_1556215, EPI_ISL_1556244, EPI_ISL_1556248, EPI_ISL_1556266, EPI_ISL_1556316, EPI_ISL_1556402, EPI_ISL_1556512, EPI_ISL_1556535, EPI_ISL_1556555, EPI_ISL_1556575, EPI_ISL_1556668, EPI_ISL_1556791, EPI_ISL_1556812, EPI_ISL_1556847, EPI_ISL_1556876, EPI_ISL_1556883, EPI_ISL_1556926, EPI_ISL_1556934, EPI_ISL_1556954, EPI_ISL_1556955, EPI_ISL_1556978, EPI_ISL_1557038, EPI_ISL_1557040, EPI_ISL_1557115, EPI_ISL_1557162                                                                                                                                                                                                                                                                                                                                                                                                                                                                                                                                                                                                                                                                                                                                                                                                                                                                                                                                                                                                                                                                                                                                                                                                                                                                                                                                             | Fulgent Genetics                                                                                    | Centers for Disease Control and Prevention Division of Viral Diseases, Pathogen Discovery                                                        | Dakota Howard, Dhvani Batra, Peter W. Cook, Kara Moser, Adrian Paskey, Jason Caravas, Benjamin Rambo-Martin, Shatavia Morrison, Christopher Gulvick, Scott Sammons, Yvette Unoarumhi, Darlene Wagner, Matthew Schmerer, Harry Gao, Mickey Li, John Gao, Joseph Fierro, Benafsh Sapra, Becky Tsai, Yan Meng, Doreen Ng, James Xie, Clinton R. Paden, Duncan MacCannell                                                                                                                                                                                                                                                                                                                                                   |                                                                                                                                                                                                                                                                                                                                                                                                                                                                                                                                                                                                                                                                                                                         |
| EPI_ISL_1557723, EPI_ISL_1558077                                                                                                                                                                                                                                                                                                                                                                                                                                                                                                                                                                                                                                                                                                                                                                                                                                                                                                                                                                                                                                                                                                                                                                                                                                                                                                                                                                                                                                                                                                                                                                                                                                                                                                                                                                                                                                                                                                                                                                                                                                                                                                                                                                                                                                                                                                                                                                                                                                                                                                                                | ASL Napoli 1 Centro                                                                                 | AMES Centro Poliagnostico Strumentale S.r.l.                                                                                                     | *Giovanni Savarese, Raffaella Ruggiero, Eloisa Evangelista, Antonella Di Carlo, Luisa Circelli, Luigi D'Amore, Nadia Petrillo, Monica Ianniello, Roberto Sirica, Maurizio D'Amora, Antonio Fico                                                                                                                                                                                                                                                                                                                                                                                                                                                                                                                         |                                                                                                                                                                                                                                                                                                                                                                                                                                                                                                                                                                                                                                                                                                                         |
| EPI_ISL_1558596, EPI_ISL_1558603, EPI_ISL_1558608, EPI_ISL_1558611, EPI_ISL_1558613                                                                                                                                                                                                                                                                                                                                                                                                                                                                                                                                                                                                                                                                                                                                                                                                                                                                                                                                                                                                                                                                                                                                                                                                                                                                                                                                                                                                                                                                                                                                                                                                                                                                                                                                                                                                                                                                                                                                                                                                                                                                                                                                                                                                                                                                                                                                                                                                                                                                             | Department of Virology, Istituto Zooprofilattico Sperimentale del Lazio e della Toscana (IZSLT)     | Department of General Diagnostics; Department of Virology; Istituto Zooprofilattico Sperimentale del Lazio e della Toscana (IZSLT)               | Patricia Alba, Giuseppe Manna, Elena L. Diacono, Fabiola Feltrin, Raffaella Conti, Teresa Scicluna, Virginia Carfora, Antonella Cersini, Alessia Franco, Antonio Battisti.                                                                                                                                                                                                                                                                                                                                                                                                                                                                                                                                              |                                                                                                                                                                                                                                                                                                                                                                                                                                                                                                                                                                                                                                                                                                                         |
| EPI_ISL_1558635, EPI_ISL_1558690                                                                                                                                                                                                                                                                                                                                                                                                                                                                                                                                                                                                                                                                                                                                                                                                                                                                                                                                                                                                                                                                                                                                                                                                                                                                                                                                                                                                                                                                                                                                                                                                                                                                                                                                                                                                                                                                                                                                                                                                                                                                                                                                                                                                                                                                                                                                                                                                                                                                                                                                | Platform BIS UZA/UAntwerpen                                                                         | UAntwerp, Laboratory of Medical Microbiology                                                                                                     | Basil Britto Xavier, Jasmine Coppens, Marie Le Mercier, Christine Lammens, Veerle Matheeuessen, Herman Goossens                                                                                                                                                                                                                                                                                                                                                                                                                                                                                                                                                                                                         |                                                                                                                                                                                                                                                                                                                                                                                                                                                                                                                                                                                                                                                                                                                         |
| EPI_ISL_1558958, EPI_ISL_1559000, EPI_ISL_1559071, EPI_ISL_1559118                                                                                                                                                                                                                                                                                                                                                                                                                                                                                                                                                                                                                                                                                                                                                                                                                                                                                                                                                                                                                                                                                                                                                                                                                                                                                                                                                                                                                                                                                                                                                                                                                                                                                                                                                                                                                                                                                                                                                                                                                                                                                                                                                                                                                                                                                                                                                                                                                                                                                              | Public Health Ontario Laboratory                                                                    | Public Health Ontario Laboratory                                                                                                                 | Vanessa G Allen, Philip Banh, Yao Chen, Richard de Borja, Alireza Eshaghi, Nahuel Fittipaldi, Christine Frantz, Jonathan B Gubbay, Jennifer L Guthrie, Lawrence Heisler, Esha Joshi, Michael Luszlof, Aimin Li, Michael CY Li, Dean Maxwell, Sandeep Nagra, Samir N Patel, Jared Simpson, Karthikeyan Sivaraman, Ashleigh Sullivan, Yogi Sundaravadanan, Sarah Teatero, Andre Villegas, Matthew Watson, Sandra Zittermann                                                                                                                                                                                                                                                                                               |                                                                                                                                                                                                                                                                                                                                                                                                                                                                                                                                                                                                                                                                                                                         |
| EPI_ISL_1559334, EPI_ISL_1559336, EPI_ISL_1559344, EPI_ISL_1559346, EPI_ISL_1559354, EPI_ISL_1559359                                                                                                                                                                                                                                                                                                                                                                                                                                                                                                                                                                                                                                                                                                                                                                                                                                                                                                                                                                                                                                                                                                                                                                                                                                                                                                                                                                                                                                                                                                                                                                                                                                                                                                                                                                                                                                                                                                                                                                                                                                                                                                                                                                                                                                                                                                                                                                                                                                                            | NJDOH, Public Health and Environmental Laboratories                                                 | NJ_PHEL                                                                                                                                          | Lindsey Bodnar, Shiv K. Verma, Jacquelyn Deverell, Matthew Scarnati, Mohammad M Ali, Dana Woell, Byeong Jeong                                                                                                                                                                                                                                                                                                                                                                                                                                                                                                                                                                                                           |                                                                                                                                                                                                                                                                                                                                                                                                                                                                                                                                                                                                                                                                                                                         |
| EPI_ISL_1559426, EPI_ISL_1559434, EPI_ISL_1559439, EPI_ISL_1559512, EPI_ISL_1559557, EPI_ISL_1559561                                                                                                                                                                                                                                                                                                                                                                                                                                                                                                                                                                                                                                                                                                                                                                                                                                                                                                                                                                                                                                                                                                                                                                                                                                                                                                                                                                                                                                                                                                                                                                                                                                                                                                                                                                                                                                                                                                                                                                                                                                                                                                                                                                                                                                                                                                                                                                                                                                                            | Quest Diagnostics Incorporated                                                                      | Centers for Disease Control and Prevention Division of Viral Diseases, Pathogen Discovery                                                        | Dakota Howard, Dhvani Batra, Peter W. Cook, Kara Moser, Adrian Paskey, Jason Caravas, Benjamin Rambo-Martin, Shatavia Morrison, Christopher Gulvick, Scott Sammons, Yvette Unoarumhi, Darlene Wagner, Matthew Schmerer, S. H. Rosenthal, A. Gerasimova, R. M. Kagan, B. Anderson, M. Hua, Y. Liu, L.E. Bernstein, K.E. Livingston, A. Perez, I. A. Shlyakhter, R. V. Rolando, R. Owen, P. Tanpaiboon, F. Lacbawan, Clinton R. Paden, Duncan MacCannell                                                                                                                                                                                                                                                                  |                                                                                                                                                                                                                                                                                                                                                                                                                                                                                                                                                                                                                                                                                                                         |
| EPI_ISL_1559634, EPI_ISL_1559635, EPI_ISL_1559644, EPI_ISL_1559645, EPI_ISL_1559666, EPI_ISL_1559677, EPI_ISL_1559713, EPI_ISL_1559719, EPI_ISL_1559818, EPI_ISL_1559822, EPI_ISL_1559826, EPI_ISL_1559855, EPI_ISL_1559874, EPI_ISL_1559881, EPI_ISL_1559884, EPI_ISL_1559922, EPI_ISL_1559947, EPI_ISL_1559978, EPI_ISL_1560009, EPI_ISL_1560048, EPI_ISL_1560050, EPI_ISL_1560065, EPI_ISL_1560094, EPI_ISL_1560104, EPI_ISL_1560110, EPI_ISL_1560185, EPI_ISL_1560227, EPI_ISL_1560261, EPI_ISL_1560277, EPI_ISL_1560290, EPI_ISL_1560340, EPI_ISL_1560343, EPI_ISL_1560349, EPI_ISL_1560352, EPI_ISL_1560379, EPI_ISL_1560403, EPI_ISL_1560421, EPI_ISL_1560597, EPI_ISL_1560601, EPI_ISL_1560602, EPI_ISL_1560620, EPI_ISL_1560644, EPI_ISL_1560653, EPI_ISL_1560804, EPI_ISL_1560855, EPI_ISL_1560897, EPI_ISL_1560998, EPI_ISL_1560952, EPI_ISL_1560971, EPI_ISL_1561031, EPI_ISL_1561124, EPI_ISL_1561140, EPI_ISL_1561193, EPI_ISL_1561196, EPI_ISL_1561240, EPI_ISL_1561255, EPI_ISL_1561260, EPI_ISL_1561264, EPI_ISL_1561282, EPI_ISL_1561299, EPI_ISL_1561315, EPI_ISL_1561318, EPI_ISL_1561334, EPI_ISL_1561359, EPI_ISL_1561406, EPI_ISL_1561412, EPI_ISL_1561434, EPI_ISL_1561439, EPI_ISL_1561440, EPI_ISL_1561441, EPI_ISL_1561466, EPI_ISL_1561484, EPI_ISL_1561497, EPI_ISL_1561512, EPI_ISL_1561576, EPI_ISL_1561591, EPI_ISL_1561598, EPI_ISL_1561643, EPI_ISL_1561646, EPI_ISL_1561668, EPI_ISL_1561696, EPI_ISL_1561712, EPI_ISL_1561732, EPI_ISL_1561745, EPI_ISL_1561837, EPI_ISL_1561838, EPI_ISL_1561858, EPI_ISL_1561884, EPI_ISL_1561933, EPI_ISL_1562098, EPI_ISL_1562112, EPI_ISL_1562137, EPI_ISL_1562155, EPI_ISL_1562165, EPI_ISL_1562242, EPI_ISL_1562275, EPI_ISL_1562285, EPI_ISL_1562284, EPI_ISL_1562316, EPI_ISL_1562413, EPI_ISL_1562414, EPI_ISL_1562430, EPI_ISL_1562545, EPI_ISL_1562558, EPI_ISL_1562573, EPI_ISL_1562607, EPI_ISL_1562618, EPI_ISL_1562661, EPI_ISL_1562685, EPI_ISL_1562698, EPI_ISL_1562735, EPI_ISL_1562786, EPI_ISL_1562807, EPI_ISL_1562822, EPI_ISL_1562834, EPI_ISL_1562838, EPI_ISL_1562855, EPI_ISL_1562892, EPI_ISL_1562914, EPI_ISL_1562920, EPI_ISL_1562922, EPI_ISL_1562923, EPI_ISL_1562930, EPI_ISL_1562934, EPI_ISL_1562937, EPI_ISL_1562956, EPI_ISL_1562994, EPI_ISL_1563010, EPI_ISL_1563036, EPI_ISL_1563056, EPI_ISL_1563057, EPI_ISL_1563095, EPI_ISL_1563110, EPI_ISL_1563177, EPI_ISL_1563184, EPI_ISL_1563193, EPI_ISL_1563275, EPI_ISL_1563364, EPI_ISL_1563377, EPI_ISL_1563457, EPI_ISL_1563533, EPI_ISL_1563547, EPI_ISL_1563587, EPI_ISL_1563603, EPI_ISL_1563606 | see above                                                                                           | Aegis Sciences Corporation                                                                                                                       | Centers for Disease Control and Prevention Division of Viral Diseases, Pathogen Discovery                                                                                                                                                                                                                                                                                                                                                                                                                                                                                                                                                                                                                               | Dakota Howard, Dhvani Batra, Peter W. Cook, Kara Moser, Adrian Paskey, Jason Caravas, Benjamin Rambo-Martin, Shatavia Morrison, Christopher Gulvick, Scott Sammons, Yvette Unoarumhi, Darlene Wagner, Matthew Schmerer, Cyndi Clark, Patrick Campbell, Rob Case, Vikramsinha Ghorpade, Holly Houdeshell, Ola Kvalvaag, Dillon Nall, Ethan Sanders, Alec Vest, Shaun Westlund, Matthew Hardison, Clinton R. Paden, Duncan MacCannell                                                                                                                                                                                                                                                                                     |
| EPI_ISL_1563679                                                                                                                                                                                                                                                                                                                                                                                                                                                                                                                                                                                                                                                                                                                                                                                                                                                                                                                                                                                                                                                                                                                                                                                                                                                                                                                                                                                                                                                                                                                                                                                                                                                                                                                                                                                                                                                                                                                                                                                                                                                                                                                                                                                                                                                                                                                                                                                                                                                                                                                                                 | Area of Virology, Serology and Virology Division (SAViD), New South Wales Health Pathology Randwick | Virology Research Laboratory; Area of Virology, Serology and Virology Division (SAViD), New South Wales Health Pathology Randwick                | Foster, C.; Au, J.; Ruiz Silva, M.; Deveson, I.; Bull, R.; Van Hal, S.; Rawlinson, W.                                                                                                                                                                                                                                                                                                                                                                                                                                                                                                                                                                                                                                   |                                                                                                                                                                                                                                                                                                                                                                                                                                                                                                                                                                                                                                                                                                                         |
| EPI_ISL_1564217                                                                                                                                                                                                                                                                                                                                                                                                                                                                                                                                                                                                                                                                                                                                                                                                                                                                                                                                                                                                                                                                                                                                                                                                                                                                                                                                                                                                                                                                                                                                                                                                                                                                                                                                                                                                                                                                                                                                                                                                                                                                                                                                                                                                                                                                                                                                                                                                                                                                                                                                                 | Lighthouse Lab in Glasgow                                                                           | Wellcome Sanger Institute for the COVID-19 Genomics UK (COG-UK) Consortium                                                                       | Harper VanSteenhouse, Yumi Kasai, David Gray, Carol Clugston, Anna Dominiczak and Alex Alderton, Roberto Amato, Jeffrey Barrett, Sonia Goncalves, Ewan Harrison, David K. Jackson, Ian Johnstone, Dominic Kwiatkowski, Cordelia Langford, John Sillitoe on behalf of the Wellcome Sanger Institute COVID-19 Surveillance Team                                                                                                                                                                                                                                                                                                                                                                                           |                                                                                                                                                                                                                                                                                                                                                                                                                                                                                                                                                                                                                                                                                                                         |
| EPI_ISL_1564287                                                                                                                                                                                                                                                                                                                                                                                                                                                                                                                                                                                                                                                                                                                                                                                                                                                                                                                                                                                                                                                                                                                                                                                                                                                                                                                                                                                                                                                                                                                                                                                                                                                                                                                                                                                                                                                                                                                                                                                                                                                                                                                                                                                                                                                                                                                                                                                                                                                                                                                                                 | Lighthouse Lab in Cambridge                                                                         | Wellcome Sanger Institute for the COVID-19 Genomics UK (COG-UK) Consortium                                                                       | Rob Howes, The Lighthouse Lab in Cambridge and Alex Alderton, Roberto Amato, Jeffrey Barrett, Sonia Goncalves, Ewan Harrison, David K. Jackson, Ian Johnstone, Dominic Kwiatkowski, Cordelia Langford, John Sillitoe on behalf of the Wellcome Sanger Institute COVID-19 Surveillance Team                                                                                                                                                                                                                                                                                                                                                                                                                              |                                                                                                                                                                                                                                                                                                                                                                                                                                                                                                                                                                                                                                                                                                                         |
| EPI_ISL_1564331, EPI_ISL_1564963, EPI_ISL_1565036, EPI_ISL_1565114                                                                                                                                                                                                                                                                                                                                                                                                                                                                                                                                                                                                                                                                                                                                                                                                                                                                                                                                                                                                                                                                                                                                                                                                                                                                                                                                                                                                                                                                                                                                                                                                                                                                                                                                                                                                                                                                                                                                                                                                                                                                                                                                                                                                                                                                                                                                                                                                                                                                                              | Lighthouse Lab in Glasgow                                                                           | Wellcome Sanger Institute for the COVID-19 Genomics UK (COG-UK) Consortium                                                                       | Harper VanSteenhouse, Yumi Kasai, David Gray, Carol Clugston, Anna Dominiczak and Alex Alderton, Roberto Amato, Jeffrey Barrett, Sonia Goncalves, Ewan Harrison, David K. Jackson, Ian Johnstone, Dominic Kwiatkowski, Cordelia Langford, John Sillitoe on behalf of the Wellcome Sanger Institute COVID-19 Surveillance Team                                                                                                                                                                                                                                                                                                                                                                                           |                                                                                                                                                                                                                                                                                                                                                                                                                                                                                                                                                                                                                                                                                                                         |
| EPI_ISL_1569534, EPI_ISL_1569739, EPI_ISL_1569763                                                                                                                                                                                                                                                                                                                                                                                                                                                                                                                                                                                                                                                                                                                                                                                                                                                                                                                                                                                                                                                                                                                                                                                                                                                                                                                                                                                                                                                                                                                                                                                                                                                                                                                                                                                                                                                                                                                                                                                                                                                                                                                                                                                                                                                                                                                                                                                                                                                                                                               | Istituto Zooprofilattico Sperimentale del Mezzogiorno                                               | TIGEM                                                                                                                                            | Antonio Grimaldi Patrizia Annunziata Francesco Panariello Biancamaria Pierri Claudia Tiberio Teresa Giuliano Valentina Bouche Chiara Colantuono Maria Concetta Cuomo Denise Di Concilio Lucio Di Filippo Anna Manfredi Marcello Salvi Antonio Limone Luigi Atripaldi Pellegrino Cerino Andrea Ballabio Davide Cacchiarelli                                                                                                                                                                                                                                                                                                                                                                                              |                                                                                                                                                                                                                                                                                                                                                                                                                                                                                                                                                                                                                                                                                                                         |
| EPI_ISL_1575296                                                                                                                                                                                                                                                                                                                                                                                                                                                                                                                                                                                                                                                                                                                                                                                                                                                                                                                                                                                                                                                                                                                                                                                                                                                                                                                                                                                                                                                                                                                                                                                                                                                                                                                                                                                                                                                                                                                                                                                                                                                                                                                                                                                                                                                                                                                                                                                                                                                                                                                                                 | Laboratoire Biolim/FSS/UL                                                                           | Unité Mixte Internationale TransVIHMI (UMI 233 IRD - U1175 INSERM - Université de Montpellier) IRD (Institut de recherche pour le développement) | Mounerou SALOU, Christelle BUTEL, Wembo A. HALATOKO, Amivi EHLAN, Abia A. KONOU, Issaka Maman, Syntyche DEVATCHAGNI, Adodo SADJI, Kokou TEGUENI, Koku AGBODEKA, Sidonie A.M.KAGNISSODE, Akoélé SILIADIN, Alassane OORO-MEDELLE, Messanh DOUFFAN, Déléma MABA, Sika DOSSIM, Améyo DORKENOO, Mireille PRINCE-DAVID, Anoumou DAGNRA, Laetitia SERRANO, Ahiydo AYOUBA, Eric DELAPORTE, Martine PEETERS                                                                                                                                                                                                                                                                                                                      |                                                                                                                                                                                                                                                                                                                                                                                                                                                                                                                                                                                                                                                                                                                         |
| EPI_ISL_1575559, EPI_ISL_1575606, EPI_ISL_1575834, EPI_ISL_1575870, EPI_ISL_1575886, EPI_ISL_1575907, EPI_ISL_1576032, EPI_ISL_1576194, EPI_ISL_1576244, EPI_ISL_1576320, EPI_ISL_1576513, EPI_ISL_1576554, EPI_ISL_1576587, EPI_ISL_1576615, EPI_ISL_1576634, EPI_ISL_1576746                                                                                                                                                                                                                                                                                                                                                                                                                                                                                                                                                                                                                                                                                                                                                                                                                                                                                                                                                                                                                                                                                                                                                                                                                                                                                                                                                                                                                                                                                                                                                                                                                                                                                                                                                                                                                                                                                                                                                                                                                                                                                                                                                                                                                                                                                  | see above                                                                                           | Helix/Illumina                                                                                                                                   | Centers for Disease Control and Prevention Division of Viral Diseases, Pathogen Discovery                                                                                                                                                                                                                                                                                                                                                                                                                                                                                                                                                                                                                               | Dakota Howard, Dhvani Batra, Peter W. Cook, Kara Moser, Adrian Paskey, Jason Caravas, Benjamin Rambo-Martin, Shatavia Morrison, Christopher Gulvick, Scott Sammons, Yvette Unoarumhi, Darlene Wagner, Matthew Schmerer, Eileen de Feo, Jan Antico, Christine Tran, Matthew Tolentino, Shannon Wickline, Kim Gietzen, Brad Sickler, Jingtao Liu, Eric Allen, Phil Febbo, Nicole L. Washington, Sherry White, Geraint Lavan, Kelly Schiabor Barrett, Elizabeth Cirulli, Alexandre Bolze, Ary Ascencio, Charlotte Rivera-Garcia, Ryan Cho, Jason Nguyen, Simon Wang, Jimmy Ramirez, Tyler Cassens, Efrén Sandoval, Magnus Isaksson, William Lee, David Becker, Marc Laurent, James Lu, Clinton R. Paden, Duncan MacCannell |

|                                                                                                                                                                                                            |                                                                                                                                                                                                                                                                                                                                                                                                                                                                                                                                                                                                                                                                                                                                                                                  |                                                                                                                                                                        |                                                                                                                                                                                                                                                                                                                                                                                                                                                                                                                                                                                                                                                                                                                                                                                                                                                                                                                                                                                                                                                                                                                                                                                                                             |
|------------------------------------------------------------------------------------------------------------------------------------------------------------------------------------------------------------|----------------------------------------------------------------------------------------------------------------------------------------------------------------------------------------------------------------------------------------------------------------------------------------------------------------------------------------------------------------------------------------------------------------------------------------------------------------------------------------------------------------------------------------------------------------------------------------------------------------------------------------------------------------------------------------------------------------------------------------------------------------------------------|------------------------------------------------------------------------------------------------------------------------------------------------------------------------|-----------------------------------------------------------------------------------------------------------------------------------------------------------------------------------------------------------------------------------------------------------------------------------------------------------------------------------------------------------------------------------------------------------------------------------------------------------------------------------------------------------------------------------------------------------------------------------------------------------------------------------------------------------------------------------------------------------------------------------------------------------------------------------------------------------------------------------------------------------------------------------------------------------------------------------------------------------------------------------------------------------------------------------------------------------------------------------------------------------------------------------------------------------------------------------------------------------------------------|
| EPI_ISL_1576810                                                                                                                                                                                            | Montana Public Health Laboratory                                                                                                                                                                                                                                                                                                                                                                                                                                                                                                                                                                                                                                                                                                                                                 | Montana Public Health Laboratory                                                                                                                                       | Joy Ritter, Michelle Mozer, Carrie Biskupiak, Deborah Gibson                                                                                                                                                                                                                                                                                                                                                                                                                                                                                                                                                                                                                                                                                                                                                                                                                                                                                                                                                                                                                                                                                                                                                                |
| EPI_ISL_1576826                                                                                                                                                                                            | NORTHWELL HEALTH LABORATORIES                                                                                                                                                                                                                                                                                                                                                                                                                                                                                                                                                                                                                                                                                                                                                    | Wadsworth Center, New York State Department of Health                                                                                                                  | Kirsten St. George, Daryl M. Lamson, Alexis Russell, Matthew Shudt, Melissa A Leisner, Jonathan Pitnick, Catharine Prussing, Navjot Singh, John Kelly, Erasmus Schneider, Erica Lasek-Nesselquist                                                                                                                                                                                                                                                                                                                                                                                                                                                                                                                                                                                                                                                                                                                                                                                                                                                                                                                                                                                                                           |
| EPI_ISL_1576862, EPI_ISL_1576873, EPI_ISL_1576878, EPI_ISL_1576881, EPI_ISL_1576883, EPI_ISL_1576887, EPI_ISL_1576890, EPI_ISL_1576896, EPI_ISL_1576901, EPI_ISL_1576916, EPI_ISL_1576928, EPI_ISL_1576937 | see above                                                                                                                                                                                                                                                                                                                                                                                                                                                                                                                                                                                                                                                                                                                                                                        | Departments of Pathology and Medicine, New York University School of Medicine                                                                                          | Adriana Heguy, Dacia Dimartino, Emily Guzman, Christian Marier, Peter Meyn, Sitharam Ramaswami, Gael Westby, Paul Zappile, Yutong Zhang, Paolo Cotzia, Guiqing Wang                                                                                                                                                                                                                                                                                                                                                                                                                                                                                                                                                                                                                                                                                                                                                                                                                                                                                                                                                                                                                                                         |
| EPI_ISL_1577055, EPI_ISL_1577092, EPI_ISL_1577104, EPI_ISL_1577122, EPI_ISL_1577127                                                                                                                        | Hospital General Universitario Gregorio Marañón                                                                                                                                                                                                                                                                                                                                                                                                                                                                                                                                                                                                                                                                                                                                  | SeqCOVID-SPAIN consortium/IBV(CSIC)                                                                                                                                    | Dario García de Viedma, Laura Pérez-Lago, Pedro J Sola-Campoy, Sergio Buenestado-Serrano, Marta Herranz, Victor Manuel de la Cueva, Julia Suárez, Pilar Catalán, Patricia Muñoz and SeqCOVID-SPAIN consortium                                                                                                                                                                                                                                                                                                                                                                                                                                                                                                                                                                                                                                                                                                                                                                                                                                                                                                                                                                                                               |
| EPI_ISL_1577214                                                                                                                                                                                            | 1.AO Universitaria 'S. Giovanni di Dio e Ruggi D'Aragona, Scuola Medica Salernitana' Hospital / 2.UOC di Virologia e Microbiologia, Università della Campania 'L. Vanvitelli' / 3.AO Universitaria 'Federico II' Napoli Hospital / 4.AORN 'San Giuseppe Moscati' Avellino Hospital / 5.AO 'San Pio - presidio G. Rummo' Benevento Hospital / 6.AO 'Sant'Anna e San Sebastiano' Caserta Hospital / 7.PO 'Maria Santissima Addolorata' Eboli Hospital / 8.Biogem Istituto di Ricerche Genetiche / 9. U.O.C. di Genetica Medica e di Laboratorio A.O.R.N., Azienda Ospedaliera di Rilievo Nazionale Antonio Cardarelli, Napoli / 10. Centro di riferimento Oncologico della Basilicata (IRCCS-CROB), Rionero in Vulture (PZ) / 11. Presidio Ospedaliero di Agropoli, Agropoli (SA). | 1. Genome Research Center for Health (CRGS) / 2. Laboratory of Molecular Medicine and Genomics(LMMGE) / 3. Center for Research in Pure and Applied Mathematics (CRMPA) | Giorgio Giurato (Corresponding Author), Francesca Rizzo (Corresponding Author), Alessandro Weisz (Corresponding Author), Gianluigi Franci, Giovanni Nassa, Pasquale Pagliano, Roberta Tarallo, Elena Alexandrova, Ylenia D'Agostino, Carlo Ferravante, Jessica Lamberti, Viola Melone, Domenico Memoli, Valeria Mirici Cappa, Domenico Palumbo, Giovanni Pecoraro, Assunta Sellitto, Oriana Strianese, Iliaria Terenzi, Giuseppe Fenza, Aniello Gentile, Antonello Saccomanno, Sonia Amabile, Teresa Rocco, Annamaria Salvati, Emilia Vaccaro, Massimiliano Galdiero, Michele Cennamo, Giuseppe Portella, Maria Grazia Foti, Mariarosaria Ingino, Maria Landi, Maurizio Fumi, Vincenzo Rocco, Rita Greco, Vittoria Letizia, Arnolfo Petruzzello, Maddalena Schioppa, Gregorio Goffredi, Francesca Marciano, Michele Caraglia, Alessia Cossu, Marianna Scrima, Edmondo Adorasio, Morena D'Avenia, Michela Iacobellis, Rosanna Piluscio, Giorgio Dirani, Vittorio Sambri, Simona Semprini, Silvia Zanoli, Francesco Curcio, Stefania Marzinotto, Andreina Baj, Fausto Sessa, Massimiliano Chetta, Marina Taritano, Giusy Giordano, Marcello Ametrano, Mariano Fiorenza, Caivano Antonella, D'Auria Fiorella, De Luca Luciana. |
| EPI_ISL_1577299                                                                                                                                                                                            | 1.AO Universitaria 'S. Giovanni di Dio e Ruggi D'Aragona, Scuola Medica Salernitana' Hospital / 2.UOC di Virologia e Microbiologia, Università della Campania 'L. Vanvitelli' / 3.AO Universitaria 'Federico II' Napoli Hospital / 4.AORN 'San Giuseppe Moscati' Avellino Hospital / 5.AO 'San Pio - presidio G. Rummo' Benevento Hospital / 6.AO 'Sant'Anna e San Sebastiano' Caserta Hospital / 7.PO 'Maria Santissima Addolorata' Eboli Hospital / 8.Biogem Istituto di Ricerche Genetiche / 9. U.O.C. di Genetica Medica e di Laboratorio A.O.R.N., Azienda Ospedaliera di Rilievo Nazionale Antonio Cardarelli, Napoli / 10. Centro di riferimento Oncologico della Basilicata (IRCCS-CROB), Rionero in Vulture (PZ) / 11. Presidio Ospedaliero di Agropoli, Agropoli (SA). | 1. Genome Research Center for Health (CRGS) / 2. Laboratory of Molecular Medicine and Genomics(LMMGE) / 3. Center for Research in Pure and Applied Mathematics (CRMPA) | Giorgio Giurato (Corresponding Author), Francesca Rizzo (Corresponding Author), Alessandro Weisz (Corresponding Author), Gianluigi Franci, Giovanni Nassa, Pasquale Pagliano, Roberta Tarallo, Elena Alexandrova, Ylenia D'Agostino, Carlo Ferravante, Jessica Lamberti, Viola Melone, Domenico Memoli, Valeria Mirici Cappa, Domenico Palumbo, Giovanni Pecoraro, Assunta Sellitto, Oriana Strianese, Iliaria Terenzi, Giuseppe Fenza, Aniello Gentile, Antonello Saccomanno, Sonia Amabile, Teresa Rocco, Annamaria Salvati, Emilia Vaccaro, Massimiliano Galdiero, Michele Cennamo, Giuseppe Portella, Maria Grazia Foti, Mariarosaria Ingino, Maria Landi, Maurizio Fumi, Vincenzo Rocco, Rita Greco, Vittoria Letizia, Arnolfo Petruzzello, Maddalena Schioppa, Gregorio Goffredi, Francesca Marciano, Michele Caraglia, Alessia Cossu, Marianna Scrima, Edmondo Adorasio, Morena D'Avenia, Michela Iacobellis, Rosanna Piluscio, Giorgio Dirani, Vittorio Sambri, Simona Semprini, Silvia Zanoli, Francesco Curcio, Stefania Marzinotto, Andreina Baj, Fausto Sessa.                                                                                                                                                  |
| EPI_ISL_1577378                                                                                                                                                                                            | CHU Lille                                                                                                                                                                                                                                                                                                                                                                                                                                                                                                                                                                                                                                                                                                                                                                        | CHU Lille - Laboratoire de Virologie                                                                                                                                   | AIT YAHYA Emilie, ALIDJINOU Enagnon Kazali, BOCKET Laurence, CREPIN Michel, DEMAY Christophe, ENGELMANN Ilka, GEFFROY Sandrine, GUYGON Aurélie, LAMBERT Valérie, LAZREK Mouna, NOBILLIAUX Florian, PREVOST Brigitte, THUILLIER Caroline, TINEZ Claire ,TCHANTCHOU NJOSSE YANICK                                                                                                                                                                                                                                                                                                                                                                                                                                                                                                                                                                                                                                                                                                                                                                                                                                                                                                                                             |
| EPI_ISL_1577598, EPI_ISL_1577728, EPI_ISL_1577782                                                                                                                                                          | Jessa                                                                                                                                                                                                                                                                                                                                                                                                                                                                                                                                                                                                                                                                                                                                                                            | Jessa                                                                                                                                                                  | Cruys et al. on behalf of the Jessa_cmdLab                                                                                                                                                                                                                                                                                                                                                                                                                                                                                                                                                                                                                                                                                                                                                                                                                                                                                                                                                                                                                                                                                                                                                                                  |
| EPI_ISL_1577934                                                                                                                                                                                            | SIESP DIPARTIMENTO DI PREVENZIONE TERAMO TERAMO(TERAMO)                                                                                                                                                                                                                                                                                                                                                                                                                                                                                                                                                                                                                                                                                                                          | Istituto Zooprofilattico Sperimentale dell'Abruzzo e Molise "G. Caporale"                                                                                              | Lorusso A, Marcacci M, Di Domenico M, Ancora M, Curini V, Mangone I, Rinaldi A, Scialabba S, Di Pasquale A, Cammà C, Puglia I, Calistri P, Savini G                                                                                                                                                                                                                                                                                                                                                                                                                                                                                                                                                                                                                                                                                                                                                                                                                                                                                                                                                                                                                                                                         |
| EPI_ISL_1578023                                                                                                                                                                                            | SIESP CHIETI - DRIVE IN CHIETI CHIETI(CHIETI)                                                                                                                                                                                                                                                                                                                                                                                                                                                                                                                                                                                                                                                                                                                                    | Istituto Zooprofilattico Sperimentale dell'Abruzzo e Molise "G. Caporale"                                                                                              | Lorusso A, Marcacci M, Di Domenico M, Ancora M, Curini V, Mangone I, Rinaldi A, Scialabba S, Di Pasquale A, Cammà C, Puglia I, Calistri P, Savini G                                                                                                                                                                                                                                                                                                                                                                                                                                                                                                                                                                                                                                                                                                                                                                                                                                                                                                                                                                                                                                                                         |
| EPI_ISL_1578160, EPI_ISL_1578170, EPI_ISL_1578185, EPI_ISL_1578223, EPI_ISL_1578277, EPI_ISL_1578282, EPI_ISL_1578285                                                                                      | Broad Institute Clinical Research Sequencing Platform                                                                                                                                                                                                                                                                                                                                                                                                                                                                                                                                                                                                                                                                                                                            | Infectious Disease Program, Broad Institute of Harvard and MIT                                                                                                         | Siddle,K.J., Adams,G., Pearlman,L., Gladden-Young,A., Vicente,G., Blumenstiel,B., DeFelice,M., Lee,M., McGovern,S., Lagerborg,K., Rudy,M., DeRuff,K., Carter,A., Normandin,E., Bauer,M., Reilly,S., Tomkins-Tinch,C., Loreth,C., Chaluvadi,S., Meldrim,J., Granger,B., Lemieux,J.E., Birren,B.W., Sabeti,P.C., Larkin,K., Dodge,S., Lennon,N., Madoff,L., Brown,C., Gallagher,G., Smole,S., Park,D.J., Gabriel,S., and MacInnis,B.L.                                                                                                                                                                                                                                                                                                                                                                                                                                                                                                                                                                                                                                                                                                                                                                                        |
| EPI_ISL_1578293                                                                                                                                                                                            | Rhode Island Department of Health                                                                                                                                                                                                                                                                                                                                                                                                                                                                                                                                                                                                                                                                                                                                                | Infectious Disease Program, Broad Institute of Harvard and MIT                                                                                                         | Siddle,K.J., Azevedo,K., Miller,A., Adams,G., Pearlman,L., Gladden-Young,A., Lagerborg,K., Rudy,M., DeRuff,K., Carter,A., Normandin,E., Bauer,M., Reilly,S., Tomkins-Tinch,C., Loreth,C., Chaluvadi,S., Lemieux,J.E., Birren,B.W., Sabeti,P.C., Huard,R., King,E., Park,D.J., and MacInnis,B.L.                                                                                                                                                                                                                                                                                                                                                                                                                                                                                                                                                                                                                                                                                                                                                                                                                                                                                                                             |
| EPI_ISL_1578325                                                                                                                                                                                            | Broad Institute Clinical Research Sequencing Platform                                                                                                                                                                                                                                                                                                                                                                                                                                                                                                                                                                                                                                                                                                                            | Infectious Disease Program, Broad Institute of Harvard and MIT                                                                                                         | Siddle,K.J., Adams,G., Pearlman,L., Gladden-Young,A., Vicente,G., Blumenstiel,B., DeFelice,M., Lee,M., McGovern,S., Lagerborg,K., Rudy,M., DeRuff,K., Carter,A., Normandin,E., Bauer,M., Reilly,S., Tomkins-Tinch,C., Loreth,C., Chaluvadi,S., Meldrim,J., Granger,B., Lemieux,J.E., Birren,B.W., Sabeti,P.C., Larkin,K., Dodge,S., Lennon,N., Madoff,L., Brown,C., Gallagher,G., Smole,S., Park,D.J., Gabriel,S., and MacInnis,B.L.                                                                                                                                                                                                                                                                                                                                                                                                                                                                                                                                                                                                                                                                                                                                                                                        |
| EPI_ISL_1578509                                                                                                                                                                                            | General Hospital Karlovac                                                                                                                                                                                                                                                                                                                                                                                                                                                                                                                                                                                                                                                                                                                                                        | Croatian Institute of Public Health                                                                                                                                    | Irena Tabain, Ivana Ferenak                                                                                                                                                                                                                                                                                                                                                                                                                                                                                                                                                                                                                                                                                                                                                                                                                                                                                                                                                                                                                                                                                                                                                                                                 |
| EPI_ISL_1578681                                                                                                                                                                                            | Furst Medical Laboratory                                                                                                                                                                                                                                                                                                                                                                                                                                                                                                                                                                                                                                                                                                                                                         | Norwegian Institute of Public Health, Department of Virology                                                                                                           | Kathrine Stene-Johansen, Kamilla Heddeland Instefjord, Hilde Elshaug, Garcia Llorente Ignacio, Jon Bråte, Engebretsen Serina Beate,Pedersen Benedikte Nevjen, Debech Nadia, Atiya R Ali,Marie Paulsen Madsen, Rasmus Riis Kopperud, Hilde Vollan, Karoline Bragstad, Olav Hungnes                                                                                                                                                                                                                                                                                                                                                                                                                                                                                                                                                                                                                                                                                                                                                                                                                                                                                                                                           |
| EPI_ISL_1578733                                                                                                                                                                                            | Ostfold Hospital Trust - Kaines, Centre for Laboratory Medicine, Section for gene technology and infection serology                                                                                                                                                                                                                                                                                                                                                                                                                                                                                                                                                                                                                                                              | Norwegian Institute of Public Health, Department of Virology                                                                                                           | Kathrine Stene-Johansen, Kamilla Heddeland Instefjord, Hilde Elshaug, Garcia Llorente Ignacio, Jon Bråte, Engebretsen Serina Beate,Pedersen Benedikte Nevjen, Debech Nadia, Atiya R Ali,Marie Paulsen Madsen, Rasmus Riis Kopperud, Hilde Vollan, Karoline Bragstad, Olav Hungnes                                                                                                                                                                                                                                                                                                                                                                                                                                                                                                                                                                                                                                                                                                                                                                                                                                                                                                                                           |
| EPI_ISL_1578756                                                                                                                                                                                            | Furst Medical Laboratory                                                                                                                                                                                                                                                                                                                                                                                                                                                                                                                                                                                                                                                                                                                                                         | Norwegian Institute of Public Health, Department of Virology                                                                                                           | Kathrine Stene-Johansen, Kamilla Heddeland Instefjord, Hilde Elshaug, Garcia Llorente Ignacio, Jon Bråte, Engebretsen Serina Beate,Pedersen Benedikte Nevjen, Debech Nadia, Atiya R Ali,Marie Paulsen Madsen, Rasmus Riis Kopperud, Hilde Vollan, Karoline Bragstad, Olav Hungnes                                                                                                                                                                                                                                                                                                                                                                                                                                                                                                                                                                                                                                                                                                                                                                                                                                                                                                                                           |
| EPI_ISL_1579237                                                                                                                                                                                            | Nebraska Public Health Laboratory                                                                                                                                                                                                                                                                                                                                                                                                                                                                                                                                                                                                                                                                                                                                                | NPHL COVID-19 Response Team                                                                                                                                            | NPHL COVID-19 Response Team                                                                                                                                                                                                                                                                                                                                                                                                                                                                                                                                                                                                                                                                                                                                                                                                                                                                                                                                                                                                                                                                                                                                                                                                 |
| EPI_ISL_1579298                                                                                                                                                                                            | Diagnostikos laboratorija                                                                                                                                                                                                                                                                                                                                                                                                                                                                                                                                                                                                                                                                                                                                                        | National Public Health Surveillance Laboratory                                                                                                                         | Lukas Zemaitis, Migle Gabrielaite, Jelena Razmuk, Svajune Muralyte, Ana Steponkiene, Lukas Vasionis, Danas Baksa                                                                                                                                                                                                                                                                                                                                                                                                                                                                                                                                                                                                                                                                                                                                                                                                                                                                                                                                                                                                                                                                                                            |
| EPI_ISL_1579523, EPI_ISL_1579891, EPI_ISL_1579901                                                                                                                                                          | NMVRVI                                                                                                                                                                                                                                                                                                                                                                                                                                                                                                                                                                                                                                                                                                                                                                           | National Public Health Surveillance Laboratory                                                                                                                         | Lukas Zemaitis, Migle Gabrielaite, Jelena Razmuk, Svajune Muralyte, Ana Steponkiene, Lukas Vasionis, Danas Baksa                                                                                                                                                                                                                                                                                                                                                                                                                                                                                                                                                                                                                                                                                                                                                                                                                                                                                                                                                                                                                                                                                                            |
| EPI_ISL_1579956                                                                                                                                                                                            | NVSP                                                                                                                                                                                                                                                                                                                                                                                                                                                                                                                                                                                                                                                                                                                                                                             | National Public Health Surveillance Laboratory                                                                                                                         | Lukas Zemaitis, Migle Gabrielaite, Jelena Razmuk, Svajune Muralyte, Ana Steponkiene, Lukas Vasionis, Danas Baksa                                                                                                                                                                                                                                                                                                                                                                                                                                                                                                                                                                                                                                                                                                                                                                                                                                                                                                                                                                                                                                                                                                            |
| EPI_ISL_1580197                                                                                                                                                                                            | NMVRVI                                                                                                                                                                                                                                                                                                                                                                                                                                                                                                                                                                                                                                                                                                                                                                           | National Public Health Surveillance Laboratory                                                                                                                         | Lukas Zemaitis, Migle Gabrielaite, Jelena Razmuk, Svajune Muralyte, Ana Steponkiene, Lukas Vasionis, Danas Baksa                                                                                                                                                                                                                                                                                                                                                                                                                                                                                                                                                                                                                                                                                                                                                                                                                                                                                                                                                                                                                                                                                                            |
| EPI_ISL_1580449                                                                                                                                                                                            | University of Michigan Clinical Microbiology Laboratory                                                                                                                                                                                                                                                                                                                                                                                                                                                                                                                                                                                                                                                                                                                          | Lauring Lab, University of Michigan, Department of Microbiology and Immunology                                                                                         | Valesano                                                                                                                                                                                                                                                                                                                                                                                                                                                                                                                                                                                                                                                                                                                                                                                                                                                                                                                                                                                                                                                                                                                                                                                                                    |
| EPI_ISL_1580526                                                                                                                                                                                            | SIESP DIPARTIMENTO DI PREVENZIONE TERAMO TERAMO(TERAMO)                                                                                                                                                                                                                                                                                                                                                                                                                                                                                                                                                                                                                                                                                                                          | Istituto Zooprofilattico Sperimentale dell'Abruzzo e Molise "G. Caporale"                                                                                              | Lorusso A, Marcacci M, Di Domenico M, Ancora M, Curini V, Di Lollo Valeria, Mangone I, Rinaldi A, Delli Compagni E, Scialabba S, Caporale M, Di Pasquale A, Cammà C, Puglia I, Calistri P, Savini G                                                                                                                                                                                                                                                                                                                                                                                                                                                                                                                                                                                                                                                                                                                                                                                                                                                                                                                                                                                                                         |
| EPI_ISL_1580668                                                                                                                                                                                            | BOSTON HEART DIAGNOSTICS CORP                                                                                                                                                                                                                                                                                                                                                                                                                                                                                                                                                                                                                                                                                                                                                    | Wadsworth Center, New York State Department of Health                                                                                                                  | Kirsten St. George, Daryl M. Lamson, Alexis Russell, Matthew Shudt, Melissa A Leisner, Jonathan Pitnick, Catharine Prussing, Navjot Singh, John Kelly, Erasmus Schneider, Erica Lasek-Nesselquist                                                                                                                                                                                                                                                                                                                                                                                                                                                                                                                                                                                                                                                                                                                                                                                                                                                                                                                                                                                                                           |
| EPI_ISL_1580675, EPI_ISL_1580676, EPI_ISL_1580677                                                                                                                                                          | WESTCHESTER MEDICAL CENTER                                                                                                                                                                                                                                                                                                                                                                                                                                                                                                                                                                                                                                                                                                                                                       | Wadsworth Center, New York State Department of Health                                                                                                                  | Kirsten St. George, Daryl M. Lamson, Alexis Russell, Matthew Shudt, Melissa A Leisner, Jonathan Pitnick, Catharine Prussing, Navjot Singh, John Kelly, Erasmus Schneider, Erica Lasek-Nesselquist                                                                                                                                                                                                                                                                                                                                                                                                                                                                                                                                                                                                                                                                                                                                                                                                                                                                                                                                                                                                                           |

|                                                                                                                                                         |                                                                                                                                |                                                                                                                                |                                                                                                                                                                                                                                                                                                                                                                                                                                                                                                                                                                                                                                                                                                                         |
|---------------------------------------------------------------------------------------------------------------------------------------------------------|--------------------------------------------------------------------------------------------------------------------------------|--------------------------------------------------------------------------------------------------------------------------------|-------------------------------------------------------------------------------------------------------------------------------------------------------------------------------------------------------------------------------------------------------------------------------------------------------------------------------------------------------------------------------------------------------------------------------------------------------------------------------------------------------------------------------------------------------------------------------------------------------------------------------------------------------------------------------------------------------------------------|
| EPI_ISL_1580681, EPI_ISL_1580683                                                                                                                        | SUNY UPSTATE MEDICAL UNIVERSITY                                                                                                | Wadsworth Center, New York State Department of Health                                                                          | Kirsten St. George, Daryl M. Lamson, Alexis Russell, Matthew Shudt, Melissa A Leisner, Jonathan Plitnick, Catharine Prussing, Navjot Singh, John Kelly, Erasmus Schneider, Erica Lasek-Nesselquist                                                                                                                                                                                                                                                                                                                                                                                                                                                                                                                      |
| EPI_ISL_1580687, EPI_ISL_1580688, EPI_ISL_1580694                                                                                                       | Columbia University Irving Medical Center                                                                                      | Wadsworth Center, New York State Department of Health                                                                          | Kirsten St. George, Daryl M. Lamson, Alexis Russell, Matthew Shudt, Melissa A Leisner, Jonathan Plitnick, Catharine Prussing, Navjot Singh, John Kelly, Erasmus Schneider, Erica Lasek-Nesselquist                                                                                                                                                                                                                                                                                                                                                                                                                                                                                                                      |
| EPI_ISL_1580703, EPI_ISL_1580705, EPI_ISL_1580713, EPI_ISL_1580722                                                                                      | URMC LABS                                                                                                                      | Wadsworth Center, New York State Department of Health                                                                          | Kirsten St. George, Daryl M. Lamson, Alexis Russell, Matthew Shudt, Melissa A Leisner, Jonathan Plitnick, Catharine Prussing, Navjot Singh, John Kelly, Erasmus Schneider, Erica Lasek-Nesselquist                                                                                                                                                                                                                                                                                                                                                                                                                                                                                                                      |
| EPI_ISL_1580723, EPI_ISL_1580729                                                                                                                        | NORTHWELL HEALTH LABORATORIES                                                                                                  | Wadsworth Center, New York State Department of Health                                                                          | Kirsten St. George, Daryl M. Lamson, Alexis Russell, Matthew Shudt, Melissa A Leisner, Jonathan Plitnick, Catharine Prussing, Navjot Singh, John Kelly, Erasmus Schneider, Erica Lasek-Nesselquist                                                                                                                                                                                                                                                                                                                                                                                                                                                                                                                      |
| EPI_ISL_1580856, EPI_ISL_1580901, EPI_ISL_1581122, EPI_ISL_1581165, EPI_ISL_1581247, EPI_ISL_1581763                                                    | Helix/Illumina                                                                                                                 | Centers for Disease Control and Prevention Division of Viral Diseases, Pathogen Discovery                                      | Dakota Howard, Dhvani Batra, Peter W. Cook, Kara Moser, Adrian Paskey, Jason Caravas, Benjamin Rambo-Martin, Shatavia Morrison, Christopher Gulvick, Scott Sammons, Yvette Unoarumhi, Darlene Wagner, Matthew Schmeier, Eileen de Feo, Jan Antico, Christine Tran, Matthew Tolentino, Shannon Wickline, Kim Gietzen, Brad Sickler, Jingtao Liu, Eric Allen, Phil Febbo, Nicole L. Washington, Simon White, Geraint Levan, Kelly Schiabor Barrett, Elizabeth Cirulli, Alexandre Bolze, Ary Ascencio, Charlotte Rivera-Garcia, Ryan Cho, Jason Nguyen, Sherry Wang, Jimmy Ramirez, Tyler Cassens, Efrén Sandoval, Magnus Isaksson, William Lee, David Becker, Marc Laurent, James Lu, Clinton R. Paden, Duncan MacCannell |
| EPI_ISL_1581874, EPI_ISL_1582042, EPI_ISL_1582051, EPI_ISL_1582090, EPI_ISL_1582091, EPI_ISL_1582100, EPI_ISL_1582109, EPI_ISL_1582153                  | Quest Diagnostics Incorporated                                                                                                 | Centers for Disease Control and Prevention Division of Viral Diseases, Pathogen Discovery                                      | Dakota Howard, Dhvani Batra, Peter W. Cook, Kara Moser, Adrian Paskey, Jason Caravas, Benjamin Rambo-Martin, Shatavia Morrison, Christopher Gulvick, Scott Sammons, Yvette Unoarumhi, Darlene Wagner, Matthew Schmeier, S. H. Rosenthal, A. Gerasimova, R. M. Kagan, B. Anderson, M. Hua, Y. Liu, L.E. Bernstein, K.E. Livingston, A. Perez, I. A. Shlyakhter, R. V. Rolando, R. Owen, P. Tanpaiboon, F. Lacbawan, Clinton R. Paden, Duncan MacCannell                                                                                                                                                                                                                                                                  |
| EPI_ISL_1582162                                                                                                                                         | MONTEFIORE MEDICAL CENTER LABORATORIES                                                                                         | Wadsworth Center, New York State Department of Health                                                                          | Kirsten St. George, Daryl M. Lamson, Alexis Russell, Matthew Shudt, Melissa A Leisner, Jonathan Plitnick, Catharine Prussing, Navjot Singh, John Kelly, Erasmus Schneider, Erica Lasek-Nesselquist                                                                                                                                                                                                                                                                                                                                                                                                                                                                                                                      |
| EPI_ISL_1582187, EPI_ISL_1582189, EPI_ISL_1582195, EPI_ISL_1582197, EPI_ISL_1582199, EPI_ISL_1582201, EPI_ISL_1582205, EPI_ISL_1582206, EPI_ISL_1582209 | NYC Pandemic Response Lab                                                                                                      | Wadsworth Center, New York State Department of Health                                                                          | Kirsten St. George, Daryl M. Lamson, Alexis Russell, Matthew Shudt, Melissa A Leisner, Jonathan Plitnick, Catharine Prussing, Navjot Singh, John Kelly, Erasmus Schneider, Erica Lasek-Nesselquist                                                                                                                                                                                                                                                                                                                                                                                                                                                                                                                      |
| EPI_ISL_1582214                                                                                                                                         | Columbia University Irving Medical Center                                                                                      | Wadsworth Center, New York State Department of Health                                                                          | Kirsten St. George, Daryl M. Lamson, Alexis Russell, Matthew Shudt, Melissa A Leisner, Jonathan Plitnick, Catharine Prussing, Navjot Singh, John Kelly, Erasmus Schneider, Erica Lasek-Nesselquist                                                                                                                                                                                                                                                                                                                                                                                                                                                                                                                      |
| EPI_ISL_1582219, EPI_ISL_1582220, EPI_ISL_1582222                                                                                                       | URMC LABS                                                                                                                      | Wadsworth Center, New York State Department of Health                                                                          | Kirsten St. George, Daryl M. Lamson, Alexis Russell, Matthew Shudt, Melissa A Leisner, Jonathan Plitnick, Catharine Prussing, Navjot Singh, John Kelly, Erasmus Schneider, Erica Lasek-Nesselquist                                                                                                                                                                                                                                                                                                                                                                                                                                                                                                                      |
| EPI_ISL_1582227                                                                                                                                         | SARATOGA HOSPITAL LABORATORY                                                                                                   | Wadsworth Center, New York State Department of Health                                                                          | Kirsten St. George, Daryl M. Lamson, Alexis Russell, Matthew Shudt, Melissa A Leisner, Jonathan Plitnick, Catharine Prussing, Navjot Singh, John Kelly, Erasmus Schneider, Erica Lasek-Nesselquist                                                                                                                                                                                                                                                                                                                                                                                                                                                                                                                      |
| EPI_ISL_1582247, EPI_ISL_1582251                                                                                                                        | STONY BROOK UNIVERSITY HOSPITAL                                                                                                | Wadsworth Center, New York State Department of Health                                                                          | Kirsten St. George, Daryl M. Lamson, Alexis Russell, Matthew Shudt, Melissa A Leisner, Jonathan Plitnick, Catharine Prussing, Navjot Singh, John Kelly, Erasmus Schneider, Erica Lasek-Nesselquist                                                                                                                                                                                                                                                                                                                                                                                                                                                                                                                      |
| EPI_ISL_1582256, EPI_ISL_1582259                                                                                                                        | NORTH SHORE UNIVERSITY HOSPITAL                                                                                                | Wadsworth Center, New York State Department of Health                                                                          | Kirsten St. George, Daryl M. Lamson, Alexis Russell, Matthew Shudt, Melissa A Leisner, Jonathan Plitnick, Catharine Prussing, Navjot Singh, John Kelly, Erasmus Schneider, Erica Lasek-Nesselquist                                                                                                                                                                                                                                                                                                                                                                                                                                                                                                                      |
| EPI_ISL_1582273, EPI_ISL_1582275, EPI_ISL_1582277, EPI_ISL_1582281                                                                                      | WHITE PLAINS HOSPITAL CENTER LABORATORY                                                                                        | Wadsworth Center, New York State Department of Health                                                                          | Kirsten St. George, Daryl M. Lamson, Alexis Russell, Matthew Shudt, Melissa A Leisner, Jonathan Plitnick, Catharine Prussing, Navjot Singh, John Kelly, Erasmus Schneider, Erica Lasek-Nesselquist                                                                                                                                                                                                                                                                                                                                                                                                                                                                                                                      |
| EPI_ISL_1582289, EPI_ISL_1582298, EPI_ISL_1582303, EPI_ISL_1582317                                                                                      | NORTHWELL HEALTH LABORATORIES                                                                                                  | Wadsworth Center, New York State Department of Health                                                                          | Kirsten St. George, Daryl M. Lamson, Alexis Russell, Matthew Shudt, Melissa A Leisner, Jonathan Plitnick, Catharine Prussing, Navjot Singh, John Kelly, Erasmus Schneider, Erica Lasek-Nesselquist                                                                                                                                                                                                                                                                                                                                                                                                                                                                                                                      |
| EPI_ISL_1582318                                                                                                                                         | SUNY UPSTATE MEDICAL UNIVERSITY                                                                                                | Wadsworth Center, New York State Department of Health                                                                          | Kirsten St. George, Daryl M. Lamson, Alexis Russell, Matthew Shudt, Melissa A Leisner, Jonathan Plitnick, Catharine Prussing, Navjot Singh, John Kelly, Erasmus Schneider, Erica Lasek-Nesselquist                                                                                                                                                                                                                                                                                                                                                                                                                                                                                                                      |
| EPI_ISL_1582322                                                                                                                                         | NYC Pandemic Response Lab                                                                                                      | Wadsworth Center, New York State Department of Health                                                                          | Kirsten St. George, Daryl M. Lamson, Alexis Russell, Matthew Shudt, Melissa A Leisner, Jonathan Plitnick, Catharine Prussing, Navjot Singh, John Kelly, Erasmus Schneider, Erica Lasek-Nesselquist                                                                                                                                                                                                                                                                                                                                                                                                                                                                                                                      |
| EPI_ISL_1582339                                                                                                                                         | URMC LABS                                                                                                                      | Wadsworth Center, New York State Department of Health                                                                          | Kirsten St. George, Daryl M. Lamson, Alexis Russell, Matthew Shudt, Melissa A Leisner, Jonathan Plitnick, Catharine Prussing, Navjot Singh, John Kelly, Erasmus Schneider, Erica Lasek-Nesselquist                                                                                                                                                                                                                                                                                                                                                                                                                                                                                                                      |
| EPI_ISL_1582354                                                                                                                                         | NORTHWELL HEALTH LABORATORIES                                                                                                  | Wadsworth Center, New York State Department of Health                                                                          | Kirsten St. George, Daryl M. Lamson, Alexis Russell, Matthew Shudt, Melissa A Leisner, Jonathan Plitnick, Catharine Prussing, Navjot Singh, John Kelly, Erasmus Schneider, Erica Lasek-Nesselquist                                                                                                                                                                                                                                                                                                                                                                                                                                                                                                                      |
| EPI_ISL_1582363, EPI_ISL_1582365, EPI_ISL_1582366                                                                                                       | SUNY UPSTATE MEDICAL UNIVERSITY                                                                                                | Wadsworth Center, New York State Department of Health                                                                          | Kirsten St. George, Daryl M. Lamson, Alexis Russell, Matthew Shudt, Melissa A Leisner, Jonathan Plitnick, Catharine Prussing, Navjot Singh, John Kelly, Erasmus Schneider, Erica Lasek-Nesselquist                                                                                                                                                                                                                                                                                                                                                                                                                                                                                                                      |
| EPI_ISL_1582371, EPI_ISL_1582382                                                                                                                        | NORTHWELL HEALTH LABORATORIES                                                                                                  | Wadsworth Center, New York State Department of Health                                                                          | Kirsten St. George, Daryl M. Lamson, Alexis Russell, Matthew Shudt, Melissa A Leisner, Jonathan Plitnick, Catharine Prussing, Navjot Singh, John Kelly, Erasmus Schneider, Erica Lasek-Nesselquist                                                                                                                                                                                                                                                                                                                                                                                                                                                                                                                      |
| EPI_ISL_1582394, EPI_ISL_1582395                                                                                                                        | Institute of Epidemiology, Disease Control and Research (IEDCR)                                                                | Institute for Developing Science and Health Initiatives (idsHI)                                                                | Hassan Afrad, Sadia Rahman, Fidausi Qadri, Tahmina Shirin                                                                                                                                                                                                                                                                                                                                                                                                                                                                                                                                                                                                                                                               |
| EPI_ISL_1582450                                                                                                                                         | New Mexico Department of Health Scientific Laboratory                                                                          | New Mexico Department of Health Scientific Laboratory                                                                          | Ellie Johnson, Anastacia Griego-Fisher, D'eldra Malone, Jennifer Benoit                                                                                                                                                                                                                                                                                                                                                                                                                                                                                                                                                                                                                                                 |
| EPI_ISL_1582773, EPI_ISL_1582798, EPI_ISL_1582934                                                                                                       | Hospital Universitari Vall d'Hebron - Vall Hebron Institut de Recerca                                                          | Hospital Universitari Vall d'Hebron - Vall Hebron Institut de Recerca                                                          | Cristina Andrés, María Piñana, Josep F Abril, Damir Garcia-Cehic, Ariadna Rando, Juliàna Esperalba, María Gema Codina, Carla Castillo, María Carmen Martín, Tomás Pumarola, Josep Quer, Asunción Antón                                                                                                                                                                                                                                                                                                                                                                                                                                                                                                                  |
| EPI_ISL_1582960                                                                                                                                         | Kansas Health and Environmental Lab                                                                                            | Kansas Health and Environmental Lab                                                                                            | Mike Grose, Jonathan Barnell, Ben Olsen, and Phil Adam                                                                                                                                                                                                                                                                                                                                                                                                                                                                                                                                                                                                                                                                  |
| EPI_ISL_1583002                                                                                                                                         | Arizona State University                                                                                                       | Arizona State University                                                                                                       | Rabia Maqsood, LaRinda A. Holland, Peter T. Skidmore, Nicholas J. Mellor, Joy M. Blain, Valerie Harris, Joshua LaBaer, Vel Murugan, Efrém S. Lim                                                                                                                                                                                                                                                                                                                                                                                                                                                                                                                                                                        |
| EPI_ISL_1583006, EPI_ISL_1583007                                                                                                                        | Institute for Medical Research, Infectious Disease Research Centre, National Institutes of Health, Ministry of Health Malaysia | Institute for Medical Research, Infectious Disease Research Centre, National Institutes of Health, Ministry of Health Malaysia | Suppiah J, Kameel K, Mohd Zawawi Z, Ramly N, Robert F, Thayyan R                                                                                                                                                                                                                                                                                                                                                                                                                                                                                                                                                                                                                                                        |
| EPI_ISL_1583009                                                                                                                                         | Hospital                                                                                                                       | National Reference Center for Viruses of Respiratory Infections, Institut Pasteur, Paris                                       | Marion Barbet, Sylvie Behillil, Frédéric Lemoine, Corinne Maufrais, Christophe Malabat, Méline Bizard, Angela Brisebarre, Camille Capel, Louise Lefrançois, Etienne Simon-Lorière, Vincent Enouf, Maud Vanpeene, Sylvie van der Werf, Emeline Riverain                                                                                                                                                                                                                                                                                                                                                                                                                                                                  |
| EPI_ISL_1583142                                                                                                                                         | Hospital                                                                                                                       | National Reference Center for Viruses of Respiratory Infections, Institut Pasteur, Paris                                       | Marion Barbet, Sylvie Behillil, Frédéric Lemoine, Corinne Maufrais, Christophe Malabat, Méline Bizard, Angela Brisebarre, Camille Capel, Louise Lefrançois, Etienne Simon-Lorière, Vincent Enouf, Maud Vanpeene, Sylvie van der Werf, Nabil Gastli                                                                                                                                                                                                                                                                                                                                                                                                                                                                      |
| EPI_ISL_1583282                                                                                                                                         | HG Pharma GmbH                                                                                                                 | Bergthaler laboratory, CeMM Research Center for Molecular Medicine of the Austrian Academy of Sciences                         | Lukas Endler, Anna Schedl, Fabian Amman, Petr Triska, Thomas Penz, Benedikt Agerer, Maelle Le Moing, Michael Schuster, Bekir Erguner, Jan Laine, Martin Senekowitsch, Christoph Bock, Andreas Bergthaler                                                                                                                                                                                                                                                                                                                                                                                                                                                                                                                |
| EPI_ISL_1583314, EPI_ISL_1583319, EPI_ISL_1583511, EPI_ISL_1583527, EPI_ISL_1583531, EPI_ISL_1583537                                                    | Austrian Agency for Health and Food Safety (AGES)                                                                              | Bergthaler laboratory, CeMM Research Center for Molecular Medicine of the Austrian Academy of Sciences                         | Lukas Endler, Anna Schedl, Fabian Amman, Petr Triska, Thomas Penz, Benedikt Agerer, Maelle Le Moing, Michael Schuster, Bekir Erguner, Jan Laine, Martin Senekowitsch, Christoph Bock, Andreas Bergthaler                                                                                                                                                                                                                                                                                                                                                                                                                                                                                                                |
| EPI_ISL_1583597, EPI_ISL_1583599, EPI_ISL_1583608, EPI_ISL_1583629                                                                                      | Microbiology Department, Laboratori Clínic Metropolitana Nord, Hospital Universitari Germans Trias i Pujol                     | Can Ruti SARS-CoV-2 Sequencing Hub (HUGTIP/IrsiCaixa/IGTP)                                                                     | Marc Noguera-Julian, Pilar Armengol, Ignacio Blanco, Antoni E Bordoy, Francesc Catala-Moll, Pere-Joan Cardona, María Casadellà, Cristina Casañ, Gemma Clara, Bonaventura Clotet, Cristina Esteban, Montserrat Giménez, Mercedes Guerrero, Anna Not, Roger Paredes, Mariona Parera, Verónica Saludes, Alba Sánchez, and Elisa Martró on behalf of the Can Ruti SARS-CoV-2 Sequencing Hub.                                                                                                                                                                                                                                                                                                                                |

|                                                                                                                                                                                                                                                                                                                                                                                                                                                                                                                                                                                                                                                                                                                                                                                                                                                                                                                                                                                                                                                                                                                                                                                                                                                                                                                                                                                               |                                                                   |                                                                                                                                                                                         |                                                                                                                                                                                                                                                                                                                                                                                                                                                                                                                                                                                                                                                                                                                                                                                                                                                                                                                                                                                                                                                       |
|-----------------------------------------------------------------------------------------------------------------------------------------------------------------------------------------------------------------------------------------------------------------------------------------------------------------------------------------------------------------------------------------------------------------------------------------------------------------------------------------------------------------------------------------------------------------------------------------------------------------------------------------------------------------------------------------------------------------------------------------------------------------------------------------------------------------------------------------------------------------------------------------------------------------------------------------------------------------------------------------------------------------------------------------------------------------------------------------------------------------------------------------------------------------------------------------------------------------------------------------------------------------------------------------------------------------------------------------------------------------------------------------------|-------------------------------------------------------------------|-----------------------------------------------------------------------------------------------------------------------------------------------------------------------------------------|-------------------------------------------------------------------------------------------------------------------------------------------------------------------------------------------------------------------------------------------------------------------------------------------------------------------------------------------------------------------------------------------------------------------------------------------------------------------------------------------------------------------------------------------------------------------------------------------------------------------------------------------------------------------------------------------------------------------------------------------------------------------------------------------------------------------------------------------------------------------------------------------------------------------------------------------------------------------------------------------------------------------------------------------------------|
| EPI_ISL_1583710                                                                                                                                                                                                                                                                                                                                                                                                                                                                                                                                                                                                                                                                                                                                                                                                                                                                                                                                                                                                                                                                                                                                                                                                                                                                                                                                                                               | Central Public Health Laboratory - LACEN -Bahia, Salvador, Brazil | Central Public Health Laboratory - LACEN -Bahia, Salvador, Brazil                                                                                                                       | Stephane Tosta, Luciana Oliveira, Vanessa Nardy,Patricia Cajado,Marcela Gómez, Breno Dominguez, Jaqueline Gomes, Vagner Fonseca,Marta Giovanetti,Luiz Alcantara, Felicidade Pereira, Arabela Leal                                                                                                                                                                                                                                                                                                                                                                                                                                                                                                                                                                                                                                                                                                                                                                                                                                                     |
| EPI_ISL_1583900, EPI_ISL_1583914                                                                                                                                                                                                                                                                                                                                                                                                                                                                                                                                                                                                                                                                                                                                                                                                                                                                                                                                                                                                                                                                                                                                                                                                                                                                                                                                                              | Lighthouse Lab in Alderley Park                                   | Wellcome Sanger Institute for the COVID-19 Genomics UK (COG-UK) Consortium                                                                                                              | Jacquelyn Wynn, Mairead Hyland, The Lighthouse Lab in Alderley Park and Alex Alderton, Roberto Amato, Jeffrey Barrett, Sonia Goncalves, Ewan Harrison, David K. Jackson, Ian Johnston, Dominic Kwiatkowski, Cordelia Langford, John Sillitoe on behalf of the Wellcome Sanger Institute COVID-19 Surveillance Team                                                                                                                                                                                                                                                                                                                                                                                                                                                                                                                                                                                                                                                                                                                                    |
| EPI_ISL_1584484                                                                                                                                                                                                                                                                                                                                                                                                                                                                                                                                                                                                                                                                                                                                                                                                                                                                                                                                                                                                                                                                                                                                                                                                                                                                                                                                                                               | GA Department of Public Health                                    | GA Department of Public Health                                                                                                                                                          | Stacy Reeves, Jonathan Edwards, Cynthia Dixey, Tonia Parrott, Aliyah Fields, Taylor Smith                                                                                                                                                                                                                                                                                                                                                                                                                                                                                                                                                                                                                                                                                                                                                                                                                                                                                                                                                             |
| EPI_ISL_1585122                                                                                                                                                                                                                                                                                                                                                                                                                                                                                                                                                                                                                                                                                                                                                                                                                                                                                                                                                                                                                                                                                                                                                                                                                                                                                                                                                                               | Arizona State University                                          | Arizona State University                                                                                                                                                                | Rabia Maqsood, LaRinda A. Holland, Peter T. Skidmore, Nicholas J. Mellor, Joy M. Blain, Valerie Harris, Joshua LaBaer, Vel Murugan, Efreem S. Lim                                                                                                                                                                                                                                                                                                                                                                                                                                                                                                                                                                                                                                                                                                                                                                                                                                                                                                     |
| EPI_ISL_1585156, EPI_ISL_1585165, EPI_ISL_1585188, EPI_ISL_1585206                                                                                                                                                                                                                                                                                                                                                                                                                                                                                                                                                                                                                                                                                                                                                                                                                                                                                                                                                                                                                                                                                                                                                                                                                                                                                                                            | Texas Department of State Health Services (TXDSHS)                | Texas Department of State Health Services (TXDSHS)                                                                                                                                      | Rashmi Tuladhara, Bonnie Oh, Jenny Zhang, Maliha Rahman, Mayela Pedrueza, Anita Pokharel, Lorraine Rodriguez, Myong Koag, Chun Wang, Rachel Lee, Grace Kubin                                                                                                                                                                                                                                                                                                                                                                                                                                                                                                                                                                                                                                                                                                                                                                                                                                                                                          |
| EPI_ISL_1585250                                                                                                                                                                                                                                                                                                                                                                                                                                                                                                                                                                                                                                                                                                                                                                                                                                                                                                                                                                                                                                                                                                                                                                                                                                                                                                                                                                               | GHC Genetics, s.r.o.                                              | GHC Genetics, s.r.o.                                                                                                                                                                    | Renata Michalovská, Tomáš Piš, Helena Paszeková, Petr Brož                                                                                                                                                                                                                                                                                                                                                                                                                                                                                                                                                                                                                                                                                                                                                                                                                                                                                                                                                                                            |
| EPI_ISL_1585283                                                                                                                                                                                                                                                                                                                                                                                                                                                                                                                                                                                                                                                                                                                                                                                                                                                                                                                                                                                                                                                                                                                                                                                                                                                                                                                                                                               | Fimlab Laboratories                                               | Fimlab Laboratories                                                                                                                                                                     | Huhti L., Paloniemi M., Lehtinen S., Luukinen B                                                                                                                                                                                                                                                                                                                                                                                                                                                                                                                                                                                                                                                                                                                                                                                                                                                                                                                                                                                                       |
| EPI_ISL_1585393, EPI_ISL_1585394, EPI_ISL_1585400                                                                                                                                                                                                                                                                                                                                                                                                                                                                                                                                                                                                                                                                                                                                                                                                                                                                                                                                                                                                                                                                                                                                                                                                                                                                                                                                             | Centro de Investigación Biomédica del Noreste (CIBIN)             | Instituto Nacional de Enfermedades Respiratorias (INER): Centro de Investigación en Enfermedades Infecciosas (CIENI)                                                                    | Consorcio Mexicano de Vigilancia Genómica (CoViGen-Mex). Authors (in alphabetical order): Julio Elias Alvarado-Yaah, Carlos F. Arias, Santiago Ávila-Ríos, Víctor Hugo Borja-Aburto, Celia Boukadida, Juan Bautista Chale-Dzul, Céliida Duque Molina, José Antonio Enciso-Moreno, Gloria Elena Espinosa-Ayala, Fernando Fontove-Herrera, Víctor Eduardo García-Arias, Concepción Grajales-Muñiz, Ricardo Grande, Alfredo Herrera-Estrella, Carla Ivón Herrera-Najera, Pavel Isa, Brenda Irasema Maldonado-Meza, Bernardo Martínez-Miguel, Margarita Matías-Florentino, María Guadalupe de Jesús Mireles-Rivera, Gloria María Molina-Salinas, Hector Montoya-Fuentes, José Esteban Muñoz-Medina, José de Jesús Nuñez-Contreras, Alicia Ocaña-Mondragón, Luis Alberto Ochoa-Carrera, Hector Esteban Paz-Juárez, Francisco Pulido, Helen Haydee Fernanda Ramírez-Plascencia, Angel Gustavo Salas-Lais, Alejandro Sanchez-Flores, Clara Esperanza Santacruz-Tinoco, María Guadalupe Santiago-Mauricio, Nelly Sélem-Mojica, Blanca Taboada, Gloria Vazquez |
| EPI_ISL_1585444                                                                                                                                                                                                                                                                                                                                                                                                                                                                                                                                                                                                                                                                                                                                                                                                                                                                                                                                                                                                                                                                                                                                                                                                                                                                                                                                                                               | Unidad de Investigación Médica de Yucatán (UIMY)                  | Instituto Nacional de Enfermedades Respiratorias (INER): Centro de Investigación en Enfermedades Infecciosas (CIENI)                                                                    | Consorcio Mexicano de Vigilancia Genómica (CoViGen-Mex). Authors (in alphabetical order): Julio Elias Alvarado-Yaah, Carlos F. Arias, Santiago Ávila-Ríos, Víctor Hugo Borja-Aburto, Celia Boukadida, Juan Bautista Chale-Dzul, Céliida Duque Molina, José Antonio Enciso-Moreno, Gloria Elena Espinosa-Ayala, Fernando Fontove-Herrera, Víctor Eduardo García-Arias, Concepción Grajales-Muñiz, Ricardo Grande, Alfredo Herrera-Estrella, Carla Ivón Herrera-Najera, Pavel Isa, Brenda Irasema Maldonado-Meza, Bernardo Martínez-Miguel, Margarita Matías-Florentino, María Guadalupe de Jesús Mireles-Rivera, Gloria María Molina-Salinas, Hector Montoya-Fuentes, José Esteban Muñoz-Medina, José de Jesús Nuñez-Contreras, Alicia Ocaña-Mondragón, Luis Alberto Ochoa-Carrera, Hector Esteban Paz-Juárez, Francisco Pulido, Helen Haydee Fernanda Ramírez-Plascencia, Angel Gustavo Salas-Lais, Alejandro Sanchez-Flores, Clara Esperanza Santacruz-Tinoco, María Guadalupe Santiago-Mauricio, Nelly Sélem-Mojica, Blanca Taboada, Gloria Vazquez |
| EPI_ISL_1585658                                                                                                                                                                                                                                                                                                                                                                                                                                                                                                                                                                                                                                                                                                                                                                                                                                                                                                                                                                                                                                                                                                                                                                                                                                                                                                                                                                               | Laboratório Central de Epidemiologia (LCE)                        | Instituto Nacional de Enfermedades Respiratorias (INER): Centro de Investigación en Enfermedades Infecciosas (CIENI)                                                                    | Consorcio Mexicano de Vigilancia Genómica (CoViGen-Mex). Authors (in alphabetical order): Julio Elias Alvarado-Yaah, Carlos F. Arias, Santiago Ávila-Ríos, Víctor Hugo Borja-Aburto, Celia Boukadida, Juan Bautista Chale-Dzul, Céliida Duque Molina, José Antonio Enciso-Moreno, Gloria Elena Espinosa-Ayala, Fernando Fontove-Herrera, Víctor Eduardo García-Arias, Concepción Grajales-Muñiz, Ricardo Grande, Alfredo Herrera-Estrella, Carla Ivón Herrera-Najera, Pavel Isa, Brenda Irasema Maldonado-Meza, Bernardo Martínez-Miguel, Margarita Matías-Florentino, María Guadalupe de Jesús Mireles-Rivera, Gloria María Molina-Salinas, Hector Montoya-Fuentes, José Esteban Muñoz-Medina, José de Jesús Nuñez-Contreras, Alicia Ocaña-Mondragón, Luis Alberto Ochoa-Carrera, Hector Esteban Paz-Juárez, Francisco Pulido, Helen Haydee Fernanda Ramírez-Plascencia, Angel Gustavo Salas-Lais, Alejandro Sanchez-Flores, Clara Esperanza Santacruz-Tinoco, María Guadalupe Santiago-Mauricio, Nelly Sélem-Mojica, Blanca Taboada, Gloria Vazquez |
| EPI_ISL_1585795                                                                                                                                                                                                                                                                                                                                                                                                                                                                                                                                                                                                                                                                                                                                                                                                                                                                                                                                                                                                                                                                                                                                                                                                                                                                                                                                                                               | Anteja laboratorija (UAB Diagnostikos laboratorija)               | Vilnius University Hospital Santaros Klinikos, Center of Laboratory Medicine                                                                                                            | Dovile Ezerskyte, Daniel Naumovas, Gytis Dudas, Ingrida Olendraitė, Rimvydas Norvilas, Ligita Raugaite, Monika Katenaite, Mindaugas Stoskus, Laimonas Griskevicius                                                                                                                                                                                                                                                                                                                                                                                                                                                                                                                                                                                                                                                                                                                                                                                                                                                                                    |
| EPI_ISL_1585917                                                                                                                                                                                                                                                                                                                                                                                                                                                                                                                                                                                                                                                                                                                                                                                                                                                                                                                                                                                                                                                                                                                                                                                                                                                                                                                                                                               | Instituto Nacional de Medicina Genomica                           | Instituto Nacional de Medicina Genomica                                                                                                                                                 | Hidalgo-Miranda A, Mendoza-Vargas A, Reyes-Grajeda JP, Cedro-Tanda A, Alcaraz N, Gonzalez-Barrera D, Rangel-DeLeon D, Miranda-Ortiz H, Rosas-Escobar P, Canseco Mendez JC, Ramirez-Vega O, Munguia-Garza P, Garcia-Cardenas FJ, Gonzalez-Woge MA, Herrera-Montalvo LA                                                                                                                                                                                                                                                                                                                                                                                                                                                                                                                                                                                                                                                                                                                                                                                 |
| EPI_ISL_1586977, EPI_ISL_1586983, EPI_ISL_1586985                                                                                                                                                                                                                                                                                                                                                                                                                                                                                                                                                                                                                                                                                                                                                                                                                                                                                                                                                                                                                                                                                                                                                                                                                                                                                                                                             | WA State PHL                                                      | Seattle Flu Study                                                                                                                                                                       | Deborah A. Nickerson, Chris D. Frazar, Jover Lee, Benjamin Pelle, Erica Ryke, Matthew Richardson, Amanda Adler, Elisabeth Brandstetter, Peter D. Han, Kairsten Fay, Misja Ilcisin, Kirsten Lacombe, Thomas R. Sibley, Melissa Truong, Caitlin R. Wolf, Romesh Gautom, Geoff Melly, Brian Hiatt, Philip Dykema, Scott Lindquist, Michael Boeckh, Janet A. Englund, Michael Famulare, Barry R. Lutz, Mark J. Rieder, Lea M. Starita, Matthew Thompson, Helen Y. Chu, Jay Shendure, Trevor Bedford                                                                                                                                                                                                                                                                                                                                                                                                                                                                                                                                                       |
| EPI_ISL_1587052                                                                                                                                                                                                                                                                                                                                                                                                                                                                                                                                                                                                                                                                                                                                                                                                                                                                                                                                                                                                                                                                                                                                                                                                                                                                                                                                                                               | Altius Institute                                                  | Seattle Flu Study                                                                                                                                                                       | Deborah A. Nickerson, Chris D. Frazar, Jover Lee, Benjamin Pelle, Erica Ryke, Matthew Richardson, Amanda Adler, Elisabeth Brandstetter, Peter D. Han, Kairsten Fay, Misja Ilcisin, Kirsten Lacombe, Thomas R. Sibley, Melissa Truong, Caitlin R. Wolf, Ryan Alexander, Daniel Bates, Rebecca Bruders, Stephanie DeBaun, Clem Green, Muhammad Halimun, Jessica Halow, Kneshay Harper, Matt Hartman, Andrew Meuser, Alex Nguyen, Truong Nguyen, Sofia Olsson, Sadie Patraw, Hannah Petersen, Tobias Ragoczy, Joshua Richards, Jacob Rodriguez, John Stamatoyannopoulos, Julia Wald, Olivia Waltner, Michael Boeckh, Janet A. Englund, Michael Famulare, Barry R. Lutz, Mark J. Rieder, Lea M. Starita, Matthew Thompson, Helen Y. Chu, Jay Shendure, Trevor Bedford                                                                                                                                                                                                                                                                                     |
| EPI_ISL_1587099                                                                                                                                                                                                                                                                                                                                                                                                                                                                                                                                                                                                                                                                                                                                                                                                                                                                                                                                                                                                                                                                                                                                                                                                                                                                                                                                                                               | Seattle Flu Study                                                 | Seattle Flu Study                                                                                                                                                                       | Deborah A. Nickerson, Chris D. Frazar, Jover Lee, Benjamin Pelle, Erica Ryke, Matthew Richardson, Amanda Adler, Elisabeth Brandstetter, Peter D. Han, Kairsten Fay, Misja Ilcisin, Kirsten Lacombe, Thomas R. Sibley, Melissa Truong, Caitlin R. Wolf, Michael Boeckh, Janet A. Englund, Michael Famulare, Barry R. Lutz, Mark J. Rieder, Lea M. Starita, Matthew Thompson, Jay Shendure, Trevor Bedford, Helen Y. Chu                                                                                                                                                                                                                                                                                                                                                                                                                                                                                                                                                                                                                                |
| EPI_ISL_1587225                                                                                                                                                                                                                                                                                                                                                                                                                                                                                                                                                                                                                                                                                                                                                                                                                                                                                                                                                                                                                                                                                                                                                                                                                                                                                                                                                                               | Altius Institute                                                  | Seattle Flu Study                                                                                                                                                                       | Deborah A. Nickerson, Chris D. Frazar, Jover Lee, Benjamin Pelle, Erica Ryke, Matthew Richardson, Amanda Adler, Elisabeth Brandstetter, Peter D. Han, Kairsten Fay, Misja Ilcisin, Kirsten Lacombe, Thomas R. Sibley, Melissa Truong, Caitlin R. Wolf, Ryan Alexander, Daniel Bates, Rebecca Bruders, Stephanie DeBaun, Clem Green, Muhammad Halimun, Jessica Halow, Kneshay Harper, Matt Hartman, Andrew Meuser, Alex Nguyen, Truong Nguyen, Sofia Olsson, Sadie Patraw, Hannah Petersen, Tobias Ragoczy, Joshua Richards, Jacob Rodriguez, John Stamatoyannopoulos, Julia Wald, Olivia Waltner, Michael Boeckh, Janet A. Englund, Michael Famulare, Barry R. Lutz, Mark J. Rieder, Lea M. Starita, Matthew Thompson, Helen Y. Chu, Jay Shendure, Trevor Bedford                                                                                                                                                                                                                                                                                     |
| EPI_ISL_1587258, EPI_ISL_1587259, EPI_ISL_1587262, EPI_ISL_1587263, EPI_ISL_1587264, EPI_ISL_1587265, EPI_ISL_1587266, EPI_ISL_1587269, EPI_ISL_1587273, EPI_ISL_1587275, EPI_ISL_1587279, EPI_ISL_1587283, EPI_ISL_1587284, EPI_ISL_1587286, EPI_ISL_1587287, EPI_ISL_1587288, EPI_ISL_1587289, EPI_ISL_1587290, EPI_ISL_1587293, EPI_ISL_1587294, EPI_ISL_1587295, EPI_ISL_1587299, EPI_ISL_1587300, EPI_ISL_1587302, EPI_ISL_1587303, EPI_ISL_1587305, EPI_ISL_1587306, EPI_ISL_1587307, EPI_ISL_1587310, EPI_ISL_1587314, EPI_ISL_1587315, EPI_ISL_1587316, EPI_ISL_1587318, EPI_ISL_1587319, EPI_ISL_1587323, EPI_ISL_1587324, EPI_ISL_1587325, EPI_ISL_1587326, EPI_ISL_1587327, EPI_ISL_1587331, EPI_ISL_1587332, EPI_ISL_1587335, EPI_ISL_1587336, EPI_ISL_1587338, EPI_ISL_1587340, EPI_ISL_1587345, EPI_ISL_1587346, EPI_ISL_1587349, EPI_ISL_1587351, EPI_ISL_1587352, EPI_ISL_1587353, EPI_ISL_1587355, EPI_ISL_1587356, EPI_ISL_1587359, EPI_ISL_1587360, EPI_ISL_1587362, EPI_ISL_1587363, EPI_ISL_1587364, EPI_ISL_1587369, EPI_ISL_1587372, EPI_ISL_1587373, EPI_ISL_1587374, EPI_ISL_1587379, EPI_ISL_1587380, EPI_ISL_1587388, EPI_ISL_1587391, EPI_ISL_1587393, EPI_ISL_1587396, EPI_ISL_1587397, EPI_ISL_1587399, EPI_ISL_1587401, EPI_ISL_1587402, EPI_ISL_1587406, EPI_ISL_1587407, EPI_ISL_1587413, EPI_ISL_1587416, EPI_ISL_1587417, EPI_ISL_1587420, EPI_ISL_1587422 | Grubaugh Lab - Yale School of Public Health                       | Joseph Fauver, Mallory Breban, Isabel Ott, Tara Alpert, Mary Petrone, Anderson Brito, Chantal Vogels, Annie Watkins, Chaney Kalinich, Jessica Rothman, Marie L. Landry, Nathan Grubaugh |                                                                                                                                                                                                                                                                                                                                                                                                                                                                                                                                                                                                                                                                                                                                                                                                                                                                                                                                                                                                                                                       |
| see above                                                                                                                                                                                                                                                                                                                                                                                                                                                                                                                                                                                                                                                                                                                                                                                                                                                                                                                                                                                                                                                                                                                                                                                                                                                                                                                                                                                     | Yale Clinical Virology Lab                                        | Grubaugh Lab - Yale School of Public Health                                                                                                                                             | Joseph Fauver, Mallory Breban, Isabel Ott, Tara Alpert, Mary Petrone, Anderson Brito, Chantal Vogels, Annie Watkins, Chaney Kalinich, Jessica Rothman, Marie L. Landry, Nathan Grubaugh                                                                                                                                                                                                                                                                                                                                                                                                                                                                                                                                                                                                                                                                                                                                                                                                                                                               |
| EPI_ISL_1587588, EPI_ISL_1587620, EPI_ISL_1587661, EPI_ISL_1587706, EPI_ISL_1587711, EPI_ISL_1587779                                                                                                                                                                                                                                                                                                                                                                                                                                                                                                                                                                                                                                                                                                                                                                                                                                                                                                                                                                                                                                                                                                                                                                                                                                                                                          | Infinity Biologix                                                 | Centers for Disease Control and Prevention Division of Viral Diseases, Pathogen Discovery                                                                                               | Dakota Howard, Dhvani Batra, Peter W. Cook, Kara Moser, Adrian Paskey, Jason Caravas, Benjamin Rambo-Martin, Shatavia Morrison, Christopher Gulvick, Scott Sammons, Yvette Inoarumhi, Darlene Wagner, Matthew Schmeer, Christian Bixby, Yihe Wang, Jonathan Schultz, Chirayu Goswami, Russ Hager, Robin Grimwood, Clinton R. Paden, Duncan MacCannell                                                                                                                                                                                                                                                                                                                                                                                                                                                                                                                                                                                                                                                                                                 |
| EPI_ISL_1587820                                                                                                                                                                                                                                                                                                                                                                                                                                                                                                                                                                                                                                                                                                                                                                                                                                                                                                                                                                                                                                                                                                                                                                                                                                                                                                                                                                               | NL-Dr. Leonard A. Miller Centre for Health Services               | National Microbiology Laboratory (NML)                                                                                                                                                  | Anna Majer, Shari Tyson, Grace Seo, Philip Mabon, Elsie Grudeski, Rhiannon Huzarewich, Russell Mandes, Anneliese Landgraff, Jennifer Tanner, Natalie Knox, Morag Graham, Gary Van Domselaar, Robert Needle, Yang Yu, Adel Malek, Laura Gilbert, George Zahariadis, Nathalie Bastien, Yan Li, Timothy Booth, Darian Hole, Madison Chapel, Kirsten Biggar, Kerri Smith, CanCOGen's metadata curation team, Public Health Agency of Canada CanCOGen team                                                                                                                                                                                                                                                                                                                                                                                                                                                                                                                                                                                                 |
| EPI_ISL_1587864, EPI_ISL_1587918, EPI_ISL_1587929, EPI_ISL_1587930, EPI_ISL_1587941, EPI_ISL_1587942, EPI_ISL_1587978, EPI_ISL_1587986, EPI_ISL_1587988, EPI_ISL_1588009, EPI_ISL_1588029, EPI_ISL_1588032, EPI_ISL_1588048, EPI_ISL_1588061, EPI_ISL_1588238, EPI_ISL_1588280, EPI_ISL_1588299, EPI_ISL_1588300, EPI_ISL_1588322, EPI_ISL_1588324, EPI_ISL_1588344, EPI_ISL_1588351, EPI_ISL_1588392, EPI_ISL_1588397                                                                                                                                                                                                                                                                                                                                                                                                                                                                                                                                                                                                                                                                                                                                                                                                                                                                                                                                                                        | Infinity Biologix                                                 | Centers for Disease Control and Prevention Division of Viral Diseases, Pathogen Discovery                                                                                               | Dakota Howard, Dhvani Batra, Peter W. Cook, Kara Moser, Adrian Paskey, Jason Caravas, Benjamin Rambo-Martin, Shatavia Morrison, Christopher Gulvick, Scott Sammons, Yvette Inoarumhi, Darlene Wagner, Matthew Schmeer, Christian Bixby, Yihe Wang, Jonathan Schultz, Chirayu Goswami, Russ Hager, Robin Grimwood, Clinton R. Paden, Duncan MacCannell                                                                                                                                                                                                                                                                                                                                                                                                                                                                                                                                                                                                                                                                                                 |
| see above                                                                                                                                                                                                                                                                                                                                                                                                                                                                                                                                                                                                                                                                                                                                                                                                                                                                                                                                                                                                                                                                                                                                                                                                                                                                                                                                                                                     | Infinity Biologix                                                 | Centers for Disease Control and Prevention Division of Viral Diseases, Pathogen Discovery                                                                                               | Dakota Howard, Dhvani Batra, Peter W. Cook, Kara Moser, Adrian Paskey, Jason Caravas, Benjamin Rambo-Martin, Shatavia Morrison, Christopher Gulvick, Scott Sammons, Yvette Inoarumhi, Darlene Wagner, Matthew Schmeer, Christian Bixby, Yihe Wang, Jonathan Schultz, Chirayu Goswami, Russ Hager, Robin Grimwood, Clinton R. Paden, Duncan MacCannell                                                                                                                                                                                                                                                                                                                                                                                                                                                                                                                                                                                                                                                                                                 |

|                                                                                                                                                                                                                                                                                                                                   |                                                                                                                                          |                                                                                                                                                                                           |                                                                                                                                                                                                                                                                                                                                                                                                                                                 |
|-----------------------------------------------------------------------------------------------------------------------------------------------------------------------------------------------------------------------------------------------------------------------------------------------------------------------------------|------------------------------------------------------------------------------------------------------------------------------------------|-------------------------------------------------------------------------------------------------------------------------------------------------------------------------------------------|-------------------------------------------------------------------------------------------------------------------------------------------------------------------------------------------------------------------------------------------------------------------------------------------------------------------------------------------------------------------------------------------------------------------------------------------------|
| EPI_ISL_1588455, EPI_ISL_1588482, EPI_ISL_1588487, EPI_ISL_1588528, EPI_ISL_1588580, EPI_ISL_1588583, EPI_ISL_1588584                                                                                                                                                                                                             | National Institute of Public Health                                                                                                      | National Institute of Public Health                                                                                                                                                       | Helena Jirincova, Jaromira Vecerova, Timotej Suri, Dusan Trnka, Alexander Nagy                                                                                                                                                                                                                                                                                                                                                                  |
| EPI_ISL_1588680, EPI_ISL_1588681, EPI_ISL_1588686, EPI_ISL_1588688, EPI_ISL_1588692, EPI_ISL_1588702, EPI_ISL_1588717, EPI_ISL_1588718, EPI_ISL_1588722, EPI_ISL_1588725, EPI_ISL_1588730, EPI_ISL_1588733, EPI_ISL_1588734, EPI_ISL_1588736, EPI_ISL_1588740, EPI_ISL_1588741, EPI_ISL_1588742                                   | see above                                                                                                                                | Biopłocká laborato s.r.o.                                                                                                                                                                 | Petr Šteiner, Tomáš Vanek, Nikola Bilá, Martina Putzová, Michaela íhová, Silva Vondráková                                                                                                                                                                                                                                                                                                                                                       |
| EPI_ISL_1588899, EPI_ISL_1588904                                                                                                                                                                                                                                                                                                  | Caribbean Public Health Agency                                                                                                           | Carrington Lab, Department of PreClinical Sciences, Faculty of Medical Sciences, The University of the West Indies                                                                        | Nikita S. D. Sahadeo, Arianne Brown-Jordan, Sarah Hill, Vernie Ramkissoon, Roshan Parasram, Naresh Nandram, Avery Hinds, Jerome Foster, Stanley Giddings, Karla Georges, Marsha Ivey, Rahul Naidu, Risha Singh, SueMin Nathaniel, Rajini Haraksingh, Jaya Jayaraman, Chinna Chinnadurai, Adesh Ramsubhag, Nuno Faria, Oliver Pybus, Christopher Oura, Gabriel Escobar, Christine V. F. Carrington                                               |
| EPI_ISL_1588921                                                                                                                                                                                                                                                                                                                   | Servicio de Microbiología Clínica (Complejo Hospitalario de Navarra, Pamplona), Instituto de Investigación Sanitaria de Navarra (IdiSNA) | SeqCOVID-SPAIN consortium/IBV(CSIC)                                                                                                                                                       | Carmen Ezpeleta Baquedano, Ana Navascués, Ana Miqueleiz and SeqCOVID-SPAIN consortium                                                                                                                                                                                                                                                                                                                                                           |
| EPI_ISL_1589003, EPI_ISL_1589004                                                                                                                                                                                                                                                                                                  | Caribbean Public Health Agency                                                                                                           | Carrington Lab, Department of PreClinical Sciences, Faculty of Medical Sciences, The University of the West Indies                                                                        | Nikita S. D. Sahadeo, Arianne Brown-Jordan, Sarah Hill, Vernie Ramkissoon, Roshan Parasram, Naresh Nandram, Avery Hinds, Jerome Foster, Stanley Giddings, Karla Georges, Marsha Ivey, Rahul Naidu, Risha Singh, SueMin Nathaniel, Rajini Haraksingh, Jaya Jayaraman, Chinna Chinnadurai, Adesh Ramsubhag, Nuno Faria, Oliver Pybus, Christopher Oura, Gabriel Escobar, Christine V. F. Carrington                                               |
| EPI_ISL_1589019                                                                                                                                                                                                                                                                                                                   | UCK                                                                                                                                      | 1. Academic Center for Pathomorphological and Genetic-Molecular Diagnostics ltd, Białystok, Poland 2. National Institute of Public Health - National Institute of Hygiene, Warsaw, Poland | Radosaw Charkiewicz, Jacek Nikliski, Przemysaw Biecek. Joanna Resze, Piotr Majewski, Anetta Sulewska, Piotr Karabowicz, Joanna Kiluk, Janusz Dzioic, Konrad Raczkowski, Katarzyna Zacharczuk, Magdalena Nowakowska, Magorzata Sadkowska-Todys, Tomasz Wokowicz                                                                                                                                                                                  |
| EPI_ISL_1589042                                                                                                                                                                                                                                                                                                                   | Diagnostyka Sp. Z o.o.                                                                                                                   | 1. Academic Center for Pathomorphological and Genetic-Molecular Diagnostics ltd, Białystok, Poland 2. National Institute of Public Health - National Institute of Hygiene, Warsaw, Poland | Radosaw Charkiewicz, Jacek Nikliski, Przemysaw Biecek. Joanna Resze, Piotr Majewski, Anetta Sulewska, Piotr Karabowicz, Joanna Kiluk, Janusz Dzioic, Konrad Raczkowski, Katarzyna Zacharczuk, Magdalena Nowakowska, Magorzata Sadkowska-Todys, Tomasz Wokowicz                                                                                                                                                                                  |
| EPI_ISL_1589046                                                                                                                                                                                                                                                                                                                   | LABORATORIUM BADA KLINICZNYCH WSSE w OPOLU                                                                                               | 1. Academic Center for Pathomorphological and Genetic-Molecular Diagnostics ltd, Białystok, Poland 2. National Institute of Public Health - National Institute of Hygiene, Warsaw, Poland | Radosaw Charkiewicz, Jacek Nikliski, Przemysaw Biecek. Joanna Resze, Piotr Majewski, Anetta Sulewska, Piotr Karabowicz, Joanna Kiluk, Janusz Dzioic, Konrad Raczkowski, Katarzyna Zacharczuk, Magdalena Nowakowska, Magorzata Sadkowska-Todys, Tomasz Wokowicz                                                                                                                                                                                  |
| EPI_ISL_1589052                                                                                                                                                                                                                                                                                                                   | SPZOZ K-KOLE                                                                                                                             | 1. Academic Center for Pathomorphological and Genetic-Molecular Diagnostics ltd, Białystok, Poland 2. National Institute of Public Health - National Institute of Hygiene, Warsaw, Poland | Radosaw Charkiewicz, Jacek Nikliski, Przemysaw Biecek. Joanna Resze, Piotr Majewski, Anetta Sulewska, Piotr Karabowicz, Joanna Kiluk, Janusz Dzioic, Konrad Raczkowski, Katarzyna Zacharczuk, Magdalena Nowakowska, Magorzata Sadkowska-Todys, Tomasz Wokowicz                                                                                                                                                                                  |
| EPI_ISL_1589089                                                                                                                                                                                                                                                                                                                   | National Institute of Public Health - National Institute of Hygiene                                                                      | 1. Academic Center for Pathomorphological and Genetic-Molecular Diagnostics ltd, Białystok, Poland 2. National Institute of Public Health - National Institute of Hygiene, Warsaw, Poland | Radosaw Charkiewicz, Jacek Nikliski, Przemysaw Biecek. Joanna Resze, Piotr Majewski, Anetta Sulewska, Piotr Karabowicz, Joanna Kiluk, Janusz Dzioic, Konrad Raczkowski, Katarzyna Zacharczuk, Magdalena Nowakowska, Magorzata Sadkowska-Todys, Tomasz Wokowicz                                                                                                                                                                                  |
| EPI_ISL_1589115                                                                                                                                                                                                                                                                                                                   | Caribbean Public Health Agency                                                                                                           | Carrington Lab, Department of PreClinical Sciences, Faculty of Medical Sciences, The University of the West Indies                                                                        | Nikita S. D. Sahadeo, Arianne Brown-Jordan, Sarah Hill, Vernie Ramkissoon, Roshan Parasram, Naresh Nandram, Avery Hinds, Jerome Foster, Stanley Giddings, Karla Georges, Marsha Ivey, Rahul Naidu, Risha Singh, SueMin Nathaniel, Rajini Haraksingh, Jaya Jayaraman, Chinna Chinnadurai, Adesh Ramsubhag, Nuno Faria, Oliver Pybus, Christopher Oura, Gabriel Escobar, Christine V. F. Carrington                                               |
| EPI_ISL_1589603                                                                                                                                                                                                                                                                                                                   | Hospital Universitario Marqués de Valdecilla - IDIVAL (Santander, Cantabria)                                                             | SeqCOVID-SPAIN consortium/IBV(CSIC)                                                                                                                                                       | Mónica Gozalo Margüello, María Eliecer Cano García, Jose Manuel Méndez Legaza, Daniel Pablo Marcos, Jesús Rodríguez Rodríguez, María Siller Ruiz and SeqCOVID-SPAIN consortium                                                                                                                                                                                                                                                                  |
| EPI_ISL_1589658, EPI_ISL_1589675, EPI_ISL_1589699, EPI_ISL_1589701, EPI_ISL_1589713, EPI_ISL_1589727, EPI_ISL_1589750, EPI_ISL_1589762, EPI_ISL_1589764, EPI_ISL_1589767, EPI_ISL_1589769, EPI_ISL_1589772, EPI_ISL_1589774, EPI_ISL_1589778, EPI_ISL_1589779, EPI_ISL_1589780, EPI_ISL_1589784, EPI_ISL_1589818, EPI_ISL_1589830 | see above                                                                                                                                | INSACOG-WB                                                                                                                                                                                | Arindam Maitra, Bhaswati Bandyopadhyay, Nidhan Kumar Biswas, Tamal Ghosh, Sreedhar Chinnaswamy, Ajay Chakraborti, Saumitra Das                                                                                                                                                                                                                                                                                                                  |
| EPI_ISL_1589981                                                                                                                                                                                                                                                                                                                   | Servicio de Microbiología. HRU de Málaga. Servicio Andaluz de Salud                                                                      | SeqCOVID-SPAIN consortium/IBV(CSIC)                                                                                                                                                       | Inmaculada de Toro Peinado, Mª Concepción Mediavilla Gradolph, Begoña Palop Borrás, Mercedes Pérez Ruiz and SeqCOVID-SPAIN consortium                                                                                                                                                                                                                                                                                                           |
| EPI_ISL_1590023                                                                                                                                                                                                                                                                                                                   | Servicio de Microbiología, Hospital Universitario Central de Asturias                                                                    | SeqCOVID-SPAIN consortium/IBV(CSIC)                                                                                                                                                       | Cristián Castelló Abietar, Jose A. Boga, Susana Rojo-Alba, Marta Elena Álvarez-Argüelles, Santiago Melón and SeqCOVID-SPAIN consortium                                                                                                                                                                                                                                                                                                          |
| EPI_ISL_1590099, EPI_ISL_1590169                                                                                                                                                                                                                                                                                                  | Riga East University Hospital-National Microbiology Reference Laboratory; Eurofins Genomics Europe Sequencing GmbH                       | Riga East University Hospital-National Microbiology Reference Laboratory; Eurofins Genomics Europe Sequencing GmbH                                                                        | irts Šenders,Reinis Vangravs,Arzu Algulieva,Reinis Zeltmatis,Drta Ppola,Ilva Pole,Dina Dusacka,Sergejs Nikisins                                                                                                                                                                                                                                                                                                                                 |
| EPI_ISL_1590242, EPI_ISL_1590248                                                                                                                                                                                                                                                                                                  | Centrl Laboratorija; Eurofins Genomics Europe Sequencing GmbH                                                                            | Riga East University Hospital-National Microbiology Reference Laboratory; Eurofins Genomics Europe Sequencing GmbH                                                                        | irts Šenders,Reinis Vangravs,Arzu Algulieva,Reinis Zeltmatis,Drta Ppola,Ilva Pole,Dina Dusacka,Sergejs Nikisins,Stella Lapia,Jana Oste                                                                                                                                                                                                                                                                                                          |
| EPI_ISL_1590582, EPI_ISL_1590585, EPI_ISL_1590601, EPI_ISL_1590621                                                                                                                                                                                                                                                                | Wojewodzka Stacja Sanitarno-Epidemiologiczna w Olsztynie, Laboratorium Badan Epidemiologiczno-Klinicznych                                | Wojewodzka Stacja Sanitarno-Epidemiologiczna w Olsztynie, Laboratorium Badan Epidemiologiczno-Klinicznych                                                                                 | Sylwia Krzetowska, Monika Czerminska, Ewa Liszewska, Tomasz Jakubczak, Marta Lukian, Patryk Bielecki, Aleksandra Kobiatko, Emilia Tarabas, Paulina Rozyczka, Barbara Dolinska                                                                                                                                                                                                                                                                   |
| EPI_ISL_1591111, EPI_ISL_1591115                                                                                                                                                                                                                                                                                                  | Laboratory for Respiratory Viruses, Cantacuzino National Military-Medical Institute for Research and Development                         | Cantacuzino Institute Virology                                                                                                                                                            | Luiza Ustea, Nicoleta Paraschiv, Cherciu Carmen, Catalina Pascu, Mihaela Oprea, Sorin Dinu, Mihaela Lazar                                                                                                                                                                                                                                                                                                                                       |
| EPI_ISL_1591121, EPI_ISL_1591122                                                                                                                                                                                                                                                                                                  | "St. Parascheva" Infectious Diseases Clinical Hospital                                                                                   | Cantacuzino Institute Virology                                                                                                                                                            | Luiza Ustea, Nicoleta Paraschiv, Cherciu Carmen, Catalina Pascu, Mihaela Oprea, Sorin Dinu, Mihaela Lazar                                                                                                                                                                                                                                                                                                                                       |
| EPI_ISL_1591132, EPI_ISL_1591135, EPI_ISL_1591139                                                                                                                                                                                                                                                                                 | Laboratory for Respiratory Viruses, Cantacuzino National Military-Medical Institute for Research and Development                         | Cantacuzino Institute Virology                                                                                                                                                            | Luiza Ustea, Nicoleta Paraschiv, Cherciu Carmen, Catalina Pascu, Mihaela Oprea, Sorin Dinu, Mihaela Lazar                                                                                                                                                                                                                                                                                                                                       |
| EPI_ISL_1591269, EPI_ISL_1591274                                                                                                                                                                                                                                                                                                  | Teaching Institute for Public Health of Varaždin County                                                                                  | Croatian Institute of Public Health                                                                                                                                                       | Irena Tabain, Ivana Ferenak                                                                                                                                                                                                                                                                                                                                                                                                                     |
| EPI_ISL_1591299                                                                                                                                                                                                                                                                                                                   | Teaching Institute for Public Health of Split-Dalmatia County                                                                            | Croatian Institute of Public Health                                                                                                                                                       | Irena Tabain, Ivana Ferenak                                                                                                                                                                                                                                                                                                                                                                                                                     |
| EPI_ISL_1591308, EPI_ISL_1591339                                                                                                                                                                                                                                                                                                  | Teaching Institute for Public Health                                                                                                     | Croatian Institute of Public Health                                                                                                                                                       | Irena Tabain, Ivana Ferenak                                                                                                                                                                                                                                                                                                                                                                                                                     |
| EPI_ISL_1591718                                                                                                                                                                                                                                                                                                                   | Caribbean Public Health Agency                                                                                                           | Carrington Lab, Department of PreClinical Sciences, Faculty of Medical Sciences, The University of the West Indies                                                                        | Nikita S. D. Sahadeo, Arianne Brown-Jordan, Sarah Hill, Vernie Ramkissoon, Roshan Parasram, Naresh Nandram, Avery Hinds, Jerome Foster, Stanley Giddings, Karla Georges, Marsha Ivey, Rahul Naidu, Risha Singh, SueMin Nathaniel, Rajini Haraksingh, Jaya Jayaraman, Chinna Chinnadurai, Adesh Ramsubhag, Nuno Faria, Oliver Pybus, Christopher Oura, Gabriel Escobar, Christine V. F. Carrington                                               |
| EPI_ISL_1592048                                                                                                                                                                                                                                                                                                                   | TGen North                                                                                                                               | TGen North                                                                                                                                                                                | Jolene Bowers, Heather Centner, Chris French, Hayley Yaglom, Ashlyn Pfeiffer, Darrin Lemmer, Dave Engelthaler, The Arizona COVID Genomics Union (ACGU)                                                                                                                                                                                                                                                                                          |
| EPI_ISL_1592292, EPI_ISL_1592300, EPI_ISL_1592310, EPI_ISL_1592331                                                                                                                                                                                                                                                                | Arizona State University                                                                                                                 | Arizona State University                                                                                                                                                                  | Peter T. Skidmore, laRinda A. Holland, Rabia Maqsood, Nicholas J. Mellor, Joy M. Blain, Valerie Harris, Joshua LaBaer, Vel Murugan, Efre S. Lim                                                                                                                                                                                                                                                                                                 |
| EPI_ISL_1592417, EPI_ISL_1592469, EPI_ISL_1592578, EPI_ISL_1592639, EPI_ISL_1592745, EPI_ISL_1592827, EPI_ISL_1592848, EPI_ISL_1592976, EPI_ISL_1592985, EPI_ISL_1593021, EPI_ISL_1593056                                                                                                                                         | see above                                                                                                                                | Helix/Illumina                                                                                                                                                                            | Centers for Disease Control and Prevention Division of Viral Diseases, Pathogen Discovery                                                                                                                                                                                                                                                                                                                                                       |
|                                                                                                                                                                                                                                                                                                                                   |                                                                                                                                          |                                                                                                                                                                                           | Dakota Howard, Dhvani Batra, Peter W. Cook, Kara Moser, Adrian Paskey, Jason Caravas, Benjamin Rambo-Martin, Shatavia Morrison, Christopher Gulvick, Scott Sammons, Yvette Unourumi, Darlene Wagner, Matthew Schmeer, Eileen de Feo, Jan Antico, Christine Tran, Matthew Tolentino, Shannon Wickline, Kim Gietzen, Brad Sickler, Jingtao Liu, Eric Allen, Phil Febbo, Nicole L. Washington, Simon White, Geraint Levan, Kelly Schiabor Barrett, |



|                                                                                     |                                                                                       |                                                                                                                                                                                           |                                                                                                                                                                                                                                                                                                                                                                                                                                                 |
|-------------------------------------------------------------------------------------|---------------------------------------------------------------------------------------|-------------------------------------------------------------------------------------------------------------------------------------------------------------------------------------------|-------------------------------------------------------------------------------------------------------------------------------------------------------------------------------------------------------------------------------------------------------------------------------------------------------------------------------------------------------------------------------------------------------------------------------------------------|
| EPI_ISL_1593217                                                                     | North Dakota Department of Health, Public Health Laboratory                           | North Dakota Department of Health, Public Health Laboratory                                                                                                                               | Elizabeth Cirulli, Alexandre Bolze, Ary Ascencio, Charlotte Rivera-Garcia, Ryan Cho, Jason Nguyen, Sherry Wang, Jimmy Ramirez, Tyler Cassens, Efrén Sandoval, Magnus Isaksson, William Lee, David Becker, Marc Laurent, James Lu, Clinton R. Paden, Duncan MacCannell                                                                                                                                                                           |
| EPI_ISL_1593245                                                                     | National Institute of Public Health - National Institute of Hygiene                   | 1. Academic Center for Pathomorphological and Genetic-Molecular Diagnostics ltd, Bialystok, Poland 2. National Institute of Public Health - National Institute of Hygiene, Warsaw, Poland | Lisa Wingerter<br>Radosaw Charkiewicz, Jacek Nikliski, Przemyslaw Biecek. Joanna Resze, Piotr Majewski, Anetta Sulewska, Piotr Karabowicz, Joanna Kiluk, Janusz Dzcio, Konrad Raczkowski, Katarzyna Zacharczuk, Magdalena Nowakowska, Magorzata Sadkowska-Todys, Tomasz Wokowicz                                                                                                                                                                |
| EPI_ISL_1593279                                                                     | Wojewódzki Specjalistyczny Szpital, Im. Dr Wadysawa Biegaskiego                       | 1. Academic Center for Pathomorphological and Genetic-Molecular Diagnostics ltd, Bialystok, Poland 2. National Institute of Public Health - National Institute of Hygiene, Warsaw, Poland | Radosaw Charkiewicz, Jacek Nikliski, Przemyslaw Biecek. Joanna Resze, Piotr Majewski, Anetta Sulewska, Piotr Karabowicz, Joanna Kiluk, Janusz Dzcio, Konrad Raczkowski, Katarzyna Zacharczuk, Magdalena Nowakowska, Magorzata Sadkowska-Todys, Tomasz Wokowicz                                                                                                                                                                                  |
| EPI_ISL_1593311                                                                     | Wielospecjalistyczny Szpital Wojewódzki                                               | 1. Academic Center for Pathomorphological and Genetic-Molecular Diagnostics ltd, Bialystok, Poland 2. National Institute of Public Health - National Institute of Hygiene, Warsaw, Poland | Radosaw Charkiewicz, Jacek Nikliski, Przemyslaw Biecek. Joanna Resze, Piotr Majewski, Anetta Sulewska, Piotr Karabowicz, Joanna Kiluk, Janusz Dzcio, Konrad Raczkowski, Katarzyna Zacharczuk, Magdalena Nowakowska, Magorzata Sadkowska-Todys, Tomasz Wokowicz                                                                                                                                                                                  |
| EPI_ISL_1593331                                                                     | Dzia Diagnostyki Laboratoryjnej Wojewódzki Szpital Specjalistyczny im.J.Gromkowskiego | 1. Academic Center for Pathomorphological and Genetic-Molecular Diagnostics ltd, Bialystok, Poland 2. National Institute of Public Health - National Institute of Hygiene, Warsaw, Poland | Radosaw Charkiewicz, Jacek Nikliski, Przemyslaw Biecek. Joanna Resze, Piotr Majewski, Anetta Sulewska, Piotr Karabowicz, Joanna Kiluk, Janusz Dzcio, Konrad Raczkowski, Katarzyna Zacharczuk, Magdalena Nowakowska, Magorzata Sadkowska-Todys, Tomasz Wokowicz                                                                                                                                                                                  |
| EPI_ISL_1593685, EPI_ISL_1593709                                                    | Minnesota Department of Health, Public Health Laboratory                              | Minnesota Department of Health, Public Health Laboratory                                                                                                                                  | Alexandra Lorentz, Jacob Garfin, Matt Plumb, and Xiong Wang                                                                                                                                                                                                                                                                                                                                                                                     |
| EPI_ISL_1593736                                                                     | DOHMH Riverside                                                                       | New York City Public Health Laboratory                                                                                                                                                    | Jade Wang, et al.                                                                                                                                                                                                                                                                                                                                                                                                                               |
| EPI_ISL_1593738, EPI_ISL_1593747                                                    | DOHMH Jamaica                                                                         | New York City Public Health Laboratory                                                                                                                                                    | Jade Wang, et al.                                                                                                                                                                                                                                                                                                                                                                                                                               |
| EPI_ISL_1593776, EPI_ISL_1593778, EPI_ISL_1593789, EPI_ISL_1593794, EPI_ISL_1593824 | Wyoming Public Health Laboratory                                                      | Wyoming Public Health Laboratory                                                                                                                                                          | Jim Mildenberger, Wanda Manley, Noah Hull, Taylor Fearing, Lynette Gumbleton, Channing Weber, Ashley Norberg, Chayse Rowley, Marley Goetz, Brian Dominguez, Elliot Thomasson, Sam Britz, Cari Sloma, and Rob Christensen                                                                                                                                                                                                                        |
| EPI_ISL_1593871, EPI_ISL_1593878                                                    | NYC Pandemic Response Lab                                                             | Wadsworth Center, New York State Department of Health                                                                                                                                     | Kirsten St. George, Daryl M. Lamson, Alexis Russell, Matthew Shudt, Melissa A Leisner, Jonathan Plitnick, Catharine Prussing, Navjot Singh, John Kelly, Erasmus Schneider, Erica Lasek-Nesselquist                                                                                                                                                                                                                                              |
| EPI_ISL_1593945, EPI_ISL_1593952, EPI_ISL_1593964, EPI_ISL_1593973                  | Missouri State Public Health Laboratory                                               | Missouri State Public Health Laboratory                                                                                                                                                   | Matthew Sinn, Joshua Barry, Ashley New                                                                                                                                                                                                                                                                                                                                                                                                          |
| EPI_ISL_1594155, EPI_ISL_1594254                                                    | MB-Cadham Provincial laboratory                                                       | National Microbiology Laboratory (NML)                                                                                                                                                    | Anna Majer, Shari Tyson, Grace Seo, Philip Mabon, Elsie Grudeski, Rhiannon Huzarewich, Russell Mandes, Anneliese Landgraff, Jennifer Tanner, Natalie Knox, Morag Graham, Gary Van Domselaar, Paul Van Caesele, Jared Bullard, David Alexander, Kerry Dust, Nathalie Bastien, Yan Li, Timothy Booth, Darian Hole, Madison Chapel, Kirsten Biggar, CanCOGeN's metadata curation team, Public Health Agency of Canada CanCOGeN team                |
| EPI_ISL_1594388, EPI_ISL_1594399, EPI_ISL_1594405, EPI_ISL_1594410                  | Labo Analyses Med                                                                     | National Reference Center for Viruses of Respiratory Infections, Institut Pasteur, Paris                                                                                                  | Marion Barbet, Sylvie Behillil, Frédéric Lemoine, Corinne Maufrais, Christophe Malabat, Méline Bizard, Angela Brisebarre, Camille Capel, Louise Lefrançois, Etienne Simon-Lorière, Vincent Enouf, Maud Vanpeene, Sylvie van der Werf, Melanie Caron                                                                                                                                                                                             |
| EPI_ISL_1594448                                                                     | Labo Analyses Med                                                                     | National Reference Center for Viruses of Respiratory Infections, Institut Pasteur, Paris                                                                                                  | Marion Barbet, Sylvie Behillil, Frédéric Lemoine, Corinne Maufrais, Christophe Malabat, Méline Bizard, Angela Brisebarre, Camille Capel, Louise Lefrançois, Etienne Simon-Lorière, Vincent Enouf, Maud Vanpeene, Sylvie van der Werf, Anne Cady                                                                                                                                                                                                 |
| EPI_ISL_1594494                                                                     | Lighthouse Lab in Milton Keynes                                                       | Wellcome Sanger Institute for the COVID-19 Genomics UK (COG-UK) Consortium                                                                                                                | The Lighthouse Lab in Milton Keynes and Alex Alderton, Roberto Amato, Jeffrey Barrett, Sonia Goncalves, Ewan Harrison, David K. Jackson, Ian Johnston, Dominic Kwiatkowski, Cordelia Langford, John Sillitoe on behalf of the Wellcome Sanger Institute COVID-19 Surveillance Team                                                                                                                                                              |
| EPI_ISL_1594539, EPI_ISL_1594583, EPI_ISL_1594621                                   | Lighthouse Lab in Glasgow                                                             | Wellcome Sanger Institute for the COVID-19 Genomics UK (COG-UK) Consortium                                                                                                                | Harper VanSteenhouse, Yumi Kasai, David Gray, Carol Clugston, Anna Dominiczak and Alex Alderton, Roberto Amato, Jeffrey Barrett, Sonia Goncalves, Ewan Harrison, David K. Jackson, Ian Johnston, Dominic Kwiatkowski, Cordelia Langford, John Sillitoe on behalf of the Wellcome Sanger Institute COVID-19 Surveillance Team                                                                                                                    |
| EPI_ISL_1594785                                                                     | Lighthouse Lab in Alderley Park                                                       | Wellcome Sanger Institute for the COVID-19 Genomics UK (COG-UK) Consortium                                                                                                                | Jacquelyn Wynn, Mairead Hyland, The Lighthouse Lab in Alderley Park and Alex Alderton, Roberto Amato, Jeffrey Barrett, Sonia Goncalves, Ewan Harrison, David K. Jackson, Ian Johnston, Dominic Kwiatkowski, Cordelia Langford, John Sillitoe on behalf of the Wellcome Sanger Institute COVID-19 Surveillance Team                                                                                                                              |
| EPI_ISL_1595120                                                                     | Lighthouse Lab in Milton Keynes                                                       | Wellcome Sanger Institute for the COVID-19 Genomics UK (COG-UK) Consortium                                                                                                                | The Lighthouse Lab in Milton Keynes and Alex Alderton, Roberto Amato, Jeffrey Barrett, Sonia Goncalves, Ewan Harrison, David K. Jackson, Ian Johnston, Dominic Kwiatkowski, Cordelia Langford, John Sillitoe on behalf of the Wellcome Sanger Institute COVID-19 Surveillance Team                                                                                                                                                              |
| EPI_ISL_1595357                                                                     | Lighthouse Lab in Glasgow                                                             | Wellcome Sanger Institute for the COVID-19 Genomics UK (COG-UK) Consortium                                                                                                                | Harper VanSteenhouse, Yumi Kasai, David Gray, Carol Clugston, Anna Dominiczak and Alex Alderton, Roberto Amato, Jeffrey Barrett, Sonia Goncalves, Ewan Harrison, David K. Jackson, Ian Johnston, Dominic Kwiatkowski, Cordelia Langford, John Sillitoe on behalf of the Wellcome Sanger Institute COVID-19 Surveillance Team                                                                                                                    |
| EPI_ISL_1595495                                                                     | Hospital                                                                              | National Reference Center for Viruses of Respiratory Infections, Institut Pasteur, Paris                                                                                                  | Marion Barbet, Sylvie Behillil, Frédéric Lemoine, Corinne Maufrais, Christophe Malabat, Méline Bizard, Angela Brisebarre, Camille Capel, Louise Lefrançois, Etienne Simon-Lorière, Vincent Enouf, Maud Vanpeene, Sylvie van der Werf, Anne Cady                                                                                                                                                                                                 |
| EPI_ISL_1595699                                                                     | SYNLAB                                                                                | GIGA Medical Genomics                                                                                                                                                                     | Keith Durkin, Maria Artesi, Sébastien Bontems, Raphaël Boreux, Bouchra Boujemla, Nathalie Renotte, Cécile Meex, Pierrette Melin, Marie-Pierre Hayette, Vincent Bours                                                                                                                                                                                                                                                                            |
| EPI_ISL_1595731                                                                     | Microbiology Department. Complexo Hospitalario Universitario de Vigo                  | Microbiology Department. Complexo Hospitalario Universitario de Vigo                                                                                                                      | Alfaya N, Alonso I, Alvarez M, Cabrera JJ, Carballo R, Cores O, Cortizo S, del-Campo V, Martínez L, Mediero G, Perez S, Potel C, Regueiro B, Rey S, Vasallo FJ                                                                                                                                                                                                                                                                                  |
| EPI_ISL_1595845                                                                     | Azienda Ospedaliera San Giovanni Addolorata                                           | INMI Lazzaro Spallanzani IRCCS                                                                                                                                                            | G Bonfiglio, O Butera, CEM Gruber, F Santini, B Bartolini, E Giombini, F Messina, M Rueca, M Gaudio, PM Placanica, A Di Caro, MR Capobianchi                                                                                                                                                                                                                                                                                                    |
| EPI_ISL_1595856                                                                     | National Institute of Mental Health and Neurosciences (NIMHANS)                       | INSACOG-KA, NIMHANS                                                                                                                                                                       | Chitra Pattabiraman, Pramada Prasad, Anson Kunjumon George, Ananthapadmanabha Kotambail, Darshan Sreenivas, Chetan G K, Gautham Arunachal Udupi, Anita S Desai, V Ravi                                                                                                                                                                                                                                                                          |
| EPI_ISL_1595861                                                                     | BBMP Urban PHC                                                                        | INSACOG-KA, NIMHANS                                                                                                                                                                       | Chitra Pattabiraman, Pramada Prasad, Anson Kunjumon George, Ananthapadmanabha Kotambail, Darshan Sreenivas, Chetan G K, Gautham Arunachal Udupi, Anita S Desai, V Ravi                                                                                                                                                                                                                                                                          |
| EPI_ISL_1595878                                                                     | WENLOCK HOSPITAL, MANGALORE                                                           | INSACOG-KA, NIMHANS                                                                                                                                                                       | Chitra Pattabiraman, Pramada Prasad, Anson Kunjumon George, Ananthapadmanabha Kotambail, Darshan Sreenivas, Chetan G K, Gautham Arunachal Udupi, Anita S Desai, V Ravi                                                                                                                                                                                                                                                                          |
| EPI_ISL_1595901, EPI_ISL_1595903                                                    | BBMP Urban PHC                                                                        | INSACOG-KA, NIMHANS                                                                                                                                                                       | Chitra Pattabiraman, Pramada Prasad, Anson Kunjumon George, Ananthapadmanabha Kotambail, Darshan Sreenivas, Chetan G K, Gautham Arunachal Udupi, Anita S Desai, V Ravi                                                                                                                                                                                                                                                                          |
| EPI_ISL_1595973, EPI_ISL_1596229, EPI_ISL_1596461                                   | Dutch COVID-19 response team                                                          | National Institute for Public Health and the Environment (RIVM)                                                                                                                           | Adam Meijer, Harry Vennema, Dirk Eggink, Jeroen Cremer, Sharon van den Brink, Bas van der Veer, AnneMarie van den Brandt, Lisa Wijsman, Kim Freriks, Rianne Jaarsma, Eunice Then, Jolienke Hardeman, Lynn Aaris, Sanne Bos, Melissa van Tuij, Robert Kohl, Linda van de Nes, Sjoerd Kulling, James Groot, Florian Zwagemaker, Dennis Schmitz, Annelies Kroneman, Karim Hajji, Chantal Reusken, on behalf of the national COVID-19 response team |
| EPI_ISL_1597651                                                                     | Rush University Medical Center                                                        | Abbott                                                                                                                                                                                    | Mary Hayden, Stefan Green, Alan Landay, Cheryl Jennings, Ana Olivo, Ana Vallari, Barbara Harris, Mary Rodgers, Todd Meyer, Gavin Cloherty                                                                                                                                                                                                                                                                                                       |
| EPI_ISL_1597747                                                                     | Montefiore Medical Center                                                             | Abbott                                                                                                                                                                                    | Yitz Goldstein, Amy Fox, Ana Olivo, Ana Vallari, Barbara Harris, Mary Rodgers, Todd Meyer, Gavin Cloherty                                                                                                                                                                                                                                                                                                                                       |
| EPI_ISL_1598188, EPI_ISL_1598197                                                    | Viollier AG                                                                           | Department of Biosystems Science and Engineering, ETH Zürich                                                                                                                              | Christian Beisel, Sarah Nadeau, Chaoran Chen, Ivan Topolsky, Philipp Jablonski, Lara Fuhrmann, David Dreifuss, Katharina Jahn, Rebecca Denes, Mirjam Feldkamp, Ina Nissen, Natascha Santacroce, Elodie Burcklen, Christiane Beckmann, Maurice Redondo, Olivier Kobel, Christoph Noppen, Sophie Seidel, Noemie Santamaria de Souza, Niko Beerenwinkel, Tanja Stadler                                                                             |

|                                                                                                                                                                                                                                                                                                                                                                                                                                                                                                                                                                                                                                                                                                                                                                                                                                                                                                                                                                                                                                                                                                                                                                                                                                                                                                                                                                                                                                                                                                                                                                                                                                             |                                                                                             |                                                                                                                                                                                                                                                                                                                                                                                                                                                                                                                                                                                                                                                                                                                                                                                                                                                                                                                                                                                                                                                  |                                                                                                                                                                                                                                                                                                                                                                                                                                                                                                                                                                                                                                                                                                                                                                                                                                                                                                                                                                                                                                                  |
|---------------------------------------------------------------------------------------------------------------------------------------------------------------------------------------------------------------------------------------------------------------------------------------------------------------------------------------------------------------------------------------------------------------------------------------------------------------------------------------------------------------------------------------------------------------------------------------------------------------------------------------------------------------------------------------------------------------------------------------------------------------------------------------------------------------------------------------------------------------------------------------------------------------------------------------------------------------------------------------------------------------------------------------------------------------------------------------------------------------------------------------------------------------------------------------------------------------------------------------------------------------------------------------------------------------------------------------------------------------------------------------------------------------------------------------------------------------------------------------------------------------------------------------------------------------------------------------------------------------------------------------------|---------------------------------------------------------------------------------------------|--------------------------------------------------------------------------------------------------------------------------------------------------------------------------------------------------------------------------------------------------------------------------------------------------------------------------------------------------------------------------------------------------------------------------------------------------------------------------------------------------------------------------------------------------------------------------------------------------------------------------------------------------------------------------------------------------------------------------------------------------------------------------------------------------------------------------------------------------------------------------------------------------------------------------------------------------------------------------------------------------------------------------------------------------|--------------------------------------------------------------------------------------------------------------------------------------------------------------------------------------------------------------------------------------------------------------------------------------------------------------------------------------------------------------------------------------------------------------------------------------------------------------------------------------------------------------------------------------------------------------------------------------------------------------------------------------------------------------------------------------------------------------------------------------------------------------------------------------------------------------------------------------------------------------------------------------------------------------------------------------------------------------------------------------------------------------------------------------------------|
| EPI_ISL_1598223                                                                                                                                                                                                                                                                                                                                                                                                                                                                                                                                                                                                                                                                                                                                                                                                                                                                                                                                                                                                                                                                                                                                                                                                                                                                                                                                                                                                                                                                                                                                                                                                                             | Viollier AG                                                                                 | Department of Biosystems Science and Engineering, ETH Zürich                                                                                                                                                                                                                                                                                                                                                                                                                                                                                                                                                                                                                                                                                                                                                                                                                                                                                                                                                                                     | Chaoran Chen, Sarah Nadeau, Ivan Topolsky, Emmanouil Dermizakis, Keith Harshman, Ioannis Xenarios, Henri Pegeot, Lorenzo Cerutti, Deborah Penet, Philipp Jablonski, Lara Fuhrmann, David Dreifuss, Katharina Jahn, Christiane Beckmann, Maurice Redondo, Olivier Kobel, Christoph Noppen, Sophie Seidel, Noemie Santamaria de Souza, Niko Beerenwinkel, Tanja Stadler                                                                                                                                                                                                                                                                                                                                                                                                                                                                                                                                                                                                                                                                            |
| EPI_ISL_1598300, EPI_ISL_1598349                                                                                                                                                                                                                                                                                                                                                                                                                                                                                                                                                                                                                                                                                                                                                                                                                                                                                                                                                                                                                                                                                                                                                                                                                                                                                                                                                                                                                                                                                                                                                                                                            | Viollier AG                                                                                 | Department of Biosystems Science and Engineering, ETH Zürich                                                                                                                                                                                                                                                                                                                                                                                                                                                                                                                                                                                                                                                                                                                                                                                                                                                                                                                                                                                     | Christian Beisel, Sarah Nadeau, Chaoran Chen, Ivan Topolsky, Philipp Jablonski, Lara Fuhrmann, David Dreifuss, Katharina Jahn, Rebecca Denes, Mirjam Feldkamp, Ina Nissen, Natascha Santacroce, Elodie Burcklen, Christiane Beckmann, Maurice Redondo, Olivier Kobel, Christoph Noppen, Sophie Seidel, Noemie Santamaria de Souza, Niko Beerenwinkel, Tanja Stadler                                                                                                                                                                                                                                                                                                                                                                                                                                                                                                                                                                                                                                                                              |
| EPI_ISL_1598410                                                                                                                                                                                                                                                                                                                                                                                                                                                                                                                                                                                                                                                                                                                                                                                                                                                                                                                                                                                                                                                                                                                                                                                                                                                                                                                                                                                                                                                                                                                                                                                                                             | Viollier AG                                                                                 | Department of Biosystems Science and Engineering, ETH Zürich                                                                                                                                                                                                                                                                                                                                                                                                                                                                                                                                                                                                                                                                                                                                                                                                                                                                                                                                                                                     | Chaoran Chen, Sarah Nadeau, Catharine Aquino, Ivan Topolsky, Philipp Jablonski, Lara Fuhrmann, David Dreifuss, Katharina Jahn, Andreia Cabral de Gouvea, Maria Domenica Moccia, Simon Grüter, Timothy Sykes, Lennart Opitz, Griffin White, Laura Neff, Doris Popovic, Andrea Patrignani, Jay Tracy, Ralph Schlapbach, Christiane Beckmann, Maurice Redondo, Olivier Kobel, Christoph Noppen, Sophie Seidel, Noemie Santamaria de Souza, Niko Beerenwinkel, Tanja Stadler                                                                                                                                                                                                                                                                                                                                                                                                                                                                                                                                                                         |
| EPI_ISL_1598474                                                                                                                                                                                                                                                                                                                                                                                                                                                                                                                                                                                                                                                                                                                                                                                                                                                                                                                                                                                                                                                                                                                                                                                                                                                                                                                                                                                                                                                                                                                                                                                                                             | Viollier AG                                                                                 | Department of Biosystems Science and Engineering, ETH Zürich                                                                                                                                                                                                                                                                                                                                                                                                                                                                                                                                                                                                                                                                                                                                                                                                                                                                                                                                                                                     | Chaoran Chen, Sarah Nadeau, Ivan Topolsky, Emmanouil Dermizakis, Keith Harshman, Ioannis Xenarios, Henri Pegeot, Lorenzo Cerutti, Deborah Penet, Philipp Jablonski, Lara Fuhrmann, David Dreifuss, Katharina Jahn, Christiane Beckmann, Maurice Redondo, Olivier Kobel, Christoph Noppen, Sophie Seidel, Noemie Santamaria de Souza, Niko Beerenwinkel, Tanja Stadler                                                                                                                                                                                                                                                                                                                                                                                                                                                                                                                                                                                                                                                                            |
| EPI_ISL_1598574                                                                                                                                                                                                                                                                                                                                                                                                                                                                                                                                                                                                                                                                                                                                                                                                                                                                                                                                                                                                                                                                                                                                                                                                                                                                                                                                                                                                                                                                                                                                                                                                                             | Viollier AG                                                                                 | Department of Biosystems Science and Engineering, ETH Zürich                                                                                                                                                                                                                                                                                                                                                                                                                                                                                                                                                                                                                                                                                                                                                                                                                                                                                                                                                                                     | Christian Beisel, Sarah Nadeau, Chaoran Chen, Ivan Topolsky, Philipp Jablonski, Lara Fuhrmann, David Dreifuss, Katharina Jahn, Rebecca Denes, Mirjam Feldkamp, Ina Nissen, Natascha Santacroce, Elodie Burcklen, Christiane Beckmann, Maurice Redondo, Olivier Kobel, Christoph Noppen, Sophie Seidel, Noemie Santamaria de Souza, Niko Beerenwinkel, Tanja Stadler                                                                                                                                                                                                                                                                                                                                                                                                                                                                                                                                                                                                                                                                              |
| EPI_ISL_1598577                                                                                                                                                                                                                                                                                                                                                                                                                                                                                                                                                                                                                                                                                                                                                                                                                                                                                                                                                                                                                                                                                                                                                                                                                                                                                                                                                                                                                                                                                                                                                                                                                             | Viollier AG                                                                                 | Department of Biosystems Science and Engineering, ETH Zürich                                                                                                                                                                                                                                                                                                                                                                                                                                                                                                                                                                                                                                                                                                                                                                                                                                                                                                                                                                                     | Chaoran Chen, Sarah Nadeau, Catharine Aquino, Ivan Topolsky, Philipp Jablonski, Lara Fuhrmann, David Dreifuss, Katharina Jahn, Andreia Cabral de Gouvea, Maria Domenica Moccia, Simon Grüter, Timothy Sykes, Lennart Opitz, Griffin White, Laura Neff, Doris Popovic, Andrea Patrignani, Jay Tracy, Ralph Schlapbach, Christiane Beckmann, Maurice Redondo, Olivier Kobel, Christoph Noppen, Sophie Seidel, Noemie Santamaria de Souza, Niko Beerenwinkel, Tanja Stadler                                                                                                                                                                                                                                                                                                                                                                                                                                                                                                                                                                         |
| EPI_ISL_1599198, EPI_ISL_1599213, EPI_ISL_1599332                                                                                                                                                                                                                                                                                                                                                                                                                                                                                                                                                                                                                                                                                                                                                                                                                                                                                                                                                                                                                                                                                                                                                                                                                                                                                                                                                                                                                                                                                                                                                                                           | Public Health Authority of the Slovak Republic                                              | Laboratory of Genomics and Bioinformatics, Comenius University Science Park                                                                                                                                                                                                                                                                                                                                                                                                                                                                                                                                                                                                                                                                                                                                                                                                                                                                                                                                                                      | Tatiana Sedičková, Diana Rusáková, Miroslav Böhm, Anna Giová, Jaroslav Budiš, Tomáš Szemes                                                                                                                                                                                                                                                                                                                                                                                                                                                                                                                                                                                                                                                                                                                                                                                                                                                                                                                                                       |
| EPI_ISL_1601302                                                                                                                                                                                                                                                                                                                                                                                                                                                                                                                                                                                                                                                                                                                                                                                                                                                                                                                                                                                                                                                                                                                                                                                                                                                                                                                                                                                                                                                                                                                                                                                                                             | UW Virology Lab                                                                             | UW Virology Lab                                                                                                                                                                                                                                                                                                                                                                                                                                                                                                                                                                                                                                                                                                                                                                                                                                                                                                                                                                                                                                  | Pavitra Roychoudhury, Hong Xie, Lasata Shrestha, Shah Mohamed Bakhsh, Michelle Lin, Noah R. Baker, Sean Ellis, Saraswathi Sathees, Meei-Li Huang, Keith R. Jerome, Alexander Greninger                                                                                                                                                                                                                                                                                                                                                                                                                                                                                                                                                                                                                                                                                                                                                                                                                                                           |
| EPI_ISL_1607899, EPI_ISL_1607904                                                                                                                                                                                                                                                                                                                                                                                                                                                                                                                                                                                                                                                                                                                                                                                                                                                                                                                                                                                                                                                                                                                                                                                                                                                                                                                                                                                                                                                                                                                                                                                                            | TXDSHS                                                                                      | TXDSHS                                                                                                                                                                                                                                                                                                                                                                                                                                                                                                                                                                                                                                                                                                                                                                                                                                                                                                                                                                                                                                           | Rashmi Tuladhar, Bonnie Oh, Jenny Zhang, Maliha Rahman, Mayela Pedrueza, Anita Pokharel, Lorraine Rodriguez, Myong Koag, Chun Wang, Rachel Lee, Grace Kubin                                                                                                                                                                                                                                                                                                                                                                                                                                                                                                                                                                                                                                                                                                                                                                                                                                                                                      |
| EPI_ISL_1607987                                                                                                                                                                                                                                                                                                                                                                                                                                                                                                                                                                                                                                                                                                                                                                                                                                                                                                                                                                                                                                                                                                                                                                                                                                                                                                                                                                                                                                                                                                                                                                                                                             | Jessa                                                                                       | Jessa                                                                                                                                                                                                                                                                                                                                                                                                                                                                                                                                                                                                                                                                                                                                                                                                                                                                                                                                                                                                                                            | Cruys et al. on behalf of the Jessa_cmdLab                                                                                                                                                                                                                                                                                                                                                                                                                                                                                                                                                                                                                                                                                                                                                                                                                                                                                                                                                                                                       |
| EPI_ISL_1608389, EPI_ISL_1608471, EPI_ISL_1608498                                                                                                                                                                                                                                                                                                                                                                                                                                                                                                                                                                                                                                                                                                                                                                                                                                                                                                                                                                                                                                                                                                                                                                                                                                                                                                                                                                                                                                                                                                                                                                                           | National Center of Infectious and Parasitic Diseases                                        | National Center of Infectious and Parasitic Diseases                                                                                                                                                                                                                                                                                                                                                                                                                                                                                                                                                                                                                                                                                                                                                                                                                                                                                                                                                                                             | Alexiev et al                                                                                                                                                                                                                                                                                                                                                                                                                                                                                                                                                                                                                                                                                                                                                                                                                                                                                                                                                                                                                                    |
| EPI_ISL_1608579                                                                                                                                                                                                                                                                                                                                                                                                                                                                                                                                                                                                                                                                                                                                                                                                                                                                                                                                                                                                                                                                                                                                                                                                                                                                                                                                                                                                                                                                                                                                                                                                                             | DIP. PREV. AVEZZANO SERVIZIO DI IGIENE EPIDEMIOLOGIA E SANITA' PUBBLICA AVEZZANO(L'AQUILA)  | Istituto Zooprofilattico Sperimentale dell'Abruzzo e Molise "G. Caporale"                                                                                                                                                                                                                                                                                                                                                                                                                                                                                                                                                                                                                                                                                                                                                                                                                                                                                                                                                                        | Lorusso A, Marcacci M, Di Domenico M, Ancora M, Curini V, Di Lollo Valeria, Mangone I, Rinaldi A, Delli Compagni E, Scialabba S, Caporale M, Di Pasquale A, Cammà C, Puglia I, Calistri P, Savini G                                                                                                                                                                                                                                                                                                                                                                                                                                                                                                                                                                                                                                                                                                                                                                                                                                              |
| EPI_ISL_1608602                                                                                                                                                                                                                                                                                                                                                                                                                                                                                                                                                                                                                                                                                                                                                                                                                                                                                                                                                                                                                                                                                                                                                                                                                                                                                                                                                                                                                                                                                                                                                                                                                             | Maryland Genomics, Institute for Genome Sciences, University of Maryland School of Medicine | Maryland Genomics, Institute for Genome Sciences, University of Maryland School of Medicine                                                                                                                                                                                                                                                                                                                                                                                                                                                                                                                                                                                                                                                                                                                                                                                                                                                                                                                                                      | Tallon, Luke J; Sadzewicz, Lisa D; Humphrys, Mike; Ott, Sandra; Roussey, Holly; Mehta, Aditya; Vavikolanu, Kranthi; Fraser, Claire M; Ravel, Jacques                                                                                                                                                                                                                                                                                                                                                                                                                                                                                                                                                                                                                                                                                                                                                                                                                                                                                             |
| EPI_ISL_1608807, EPI_ISL_1608821, EPI_ISL_1608853, EPI_ISL_1609090, EPI_ISL_1609097, EPI_ISL_1609220, EPI_ISL_1609246, EPI_ISL_1609248, EPI_ISL_1609250, EPI_ISL_1609261, EPI_ISL_1609263, EPI_ISL_1609264, EPI_ISL_1609270, EPI_ISL_1609271, EPI_ISL_1609273, EPI_ISL_1609293, EPI_ISL_1609299, EPI_ISL_1609303, EPI_ISL_1609322, EPI_ISL_1609335, EPI_ISL_1609336, EPI_ISL_1609338, EPI_ISL_1609344, EPI_ISL_1609345, EPI_ISL_1609346, EPI_ISL_1609350, EPI_ISL_1609357, EPI_ISL_1609366, EPI_ISL_1609374, EPI_ISL_1609377, EPI_ISL_1609393, EPI_ISL_1609434, EPI_ISL_1609436, EPI_ISL_1609493, EPI_ISL_1609503, EPI_ISL_1609505, EPI_ISL_1609509, EPI_ISL_1609514, EPI_ISL_1609518, EPI_ISL_1609539, EPI_ISL_1609547, EPI_ISL_1609550, EPI_ISL_1609555, EPI_ISL_1609591, EPI_ISL_1609618, EPI_ISL_1609638, EPI_ISL_1609639, EPI_ISL_1609650, EPI_ISL_1609671, EPI_ISL_1609673, EPI_ISL_1609674, EPI_ISL_1609720, EPI_ISL_1609724, EPI_ISL_1609746, EPI_ISL_1609753, EPI_ISL_1609758, EPI_ISL_1609774, EPI_ISL_1609776, EPI_ISL_1609781, EPI_ISL_1609783, EPI_ISL_1609784, EPI_ISL_1609785, EPI_ISL_1609803, EPI_ISL_1609814, EPI_ISL_1609862, EPI_ISL_1609867, EPI_ISL_1609868, EPI_ISL_1609869, EPI_ISL_1609879, EPI_ISL_1609883, EPI_ISL_1609911, EPI_ISL_1609920, EPI_ISL_1609937, EPI_ISL_1609940, EPI_ISL_1609953, EPI_ISL_1609979, EPI_ISL_1609981, EPI_ISL_1610010, EPI_ISL_1610045, EPI_ISL_1610046, EPI_ISL_1610118, EPI_ISL_1610172, EPI_ISL_1610192, EPI_ISL_1610211, EPI_ISL_1610229, EPI_ISL_1610239, EPI_ISL_1610303, EPI_ISL_1610323, EPI_ISL_1610326, EPI_ISL_1610367, EPI_ISL_1610411, EPI_ISL_1610467, EPI_ISL_1610573 | Centers for Disease Control and Prevention Division of Viral Diseases, Pathogen Discovery   | Dakota Howard, Dhvani Batra, Peter W. Cook, Kara Moser, Adrian Paskey, Jason Caravas, Benjamin Rambo-Martin, Shatavia Morrison, Christopher Gulvick, Scott Sammons, Yvette Unoarumhi, Darlene Wagner, Matthew Schmerer, Minoo Agarwal, Eyad Almasri, Debbie Boles, Ayla Burns, Nuthawin Charoensri, Oren Cohen, Susan Countryman, Mary Ann Cristobal, Bobbi Croy, Suzanne Dale, Hrushikesh Deshmukh, Amanda Douglas, Vincent Drouillon, Marcia Eisenberg, Howard Engler, Rama Ghatti, Prashant Gupta, Susan Hicks, Jake Humphrey, Lax Iyer, Manoj Jain, Mohan Kolli, Brian Krueger, Tim Kuphal, Stanley Letovsky, Michael Levandoski, Craig Lukasik, Jonathan Meltzer, Brian Norvell, Mindy Nye, Scott Parker, Christos Petropoulos, John Pruitt, Steven Ragan, Scott Ryan, Mike Sapeta, Jana Schroth, Suresh Babu Selvaraju, Goran Stevovic, Amanda Suchanek, Andrea Throop, Lyndon Tilson, Thomas Urban, Joe Voshell, Kimberly Wagner, Jonathan Williams, Mary Williamson, Qian Zeng, Tricia Zwiefelhofer, Clinton R. Paden, Duncan MacCannell |                                                                                                                                                                                                                                                                                                                                                                                                                                                                                                                                                                                                                                                                                                                                                                                                                                                                                                                                                                                                                                                  |
| see above                                                                                                                                                                                                                                                                                                                                                                                                                                                                                                                                                                                                                                                                                                                                                                                                                                                                                                                                                                                                                                                                                                                                                                                                                                                                                                                                                                                                                                                                                                                                                                                                                                   | Laboratory Corporation of America                                                           | Centers for Disease Control and Prevention Division of Viral Diseases, Pathogen Discovery                                                                                                                                                                                                                                                                                                                                                                                                                                                                                                                                                                                                                                                                                                                                                                                                                                                                                                                                                        | Githinji G.,Mateo D.,Mohamed K.S.,de Laurent Z.,Mburu M.W.,Thiongo K.                                                                                                                                                                                                                                                                                                                                                                                                                                                                                                                                                                                                                                                                                                                                                                                                                                                                                                                                                                            |
| EPI_ISL_1610598                                                                                                                                                                                                                                                                                                                                                                                                                                                                                                                                                                                                                                                                                                                                                                                                                                                                                                                                                                                                                                                                                                                                                                                                                                                                                                                                                                                                                                                                                                                                                                                                                             | KEMRI Center for Biotechnology Research and Development                                     | KEMRI-Wellcome Trust Research Programme,Kilifi                                                                                                                                                                                                                                                                                                                                                                                                                                                                                                                                                                                                                                                                                                                                                                                                                                                                                                                                                                                                   | Githinji G.,Mateo D.,Mohamed K.S.,de Laurent Z.,Mburu M.W.,Thiongo K.                                                                                                                                                                                                                                                                                                                                                                                                                                                                                                                                                                                                                                                                                                                                                                                                                                                                                                                                                                            |
| EPI_ISL_1610601                                                                                                                                                                                                                                                                                                                                                                                                                                                                                                                                                                                                                                                                                                                                                                                                                                                                                                                                                                                                                                                                                                                                                                                                                                                                                                                                                                                                                                                                                                                                                                                                                             | Laboratory Corporation of America                                                           | Centers for Disease Control and Prevention Division of Viral Diseases, Pathogen Discovery                                                                                                                                                                                                                                                                                                                                                                                                                                                                                                                                                                                                                                                                                                                                                                                                                                                                                                                                                        | Dakota Howard, Dhvani Batra, Peter W. Cook, Kara Moser, Adrian Paskey, Jason Caravas, Benjamin Rambo-Martin, Shatavia Morrison, Christopher Gulvick, Scott Sammons, Yvette Unoarumhi, Darlene Wagner, Matthew Schmerer, Minoo Agarwal, Eyad Almasri, Debbie Boles, Ayla Burns, Nuthawin Charoensri, Oren Cohen, Susan Countryman, Mary Ann Cristobal, Bobbi Croy, Suzanne Dale, Hrushikesh Deshmukh, Amanda Douglas, Vincent Drouillon, Marcia Eisenberg, Howard Engler, Rama Ghatti, Prashant Gupta, Susan Hicks, Jake Humphrey, Lax Iyer, Manoj Jain, Mohan Kolli, Brian Krueger, Tim Kuphal, Stanley Letovsky, Michael Levandoski, Craig Lukasik, Jonathan Meltzer, Brian Norvell, Mindy Nye, Scott Parker, Christos Petropoulos, John Pruitt, Steven Ragan, Scott Ryan, Mike Sapeta, Jana Schroth, Suresh Babu Selvaraju, Goran Stevovic, Amanda Suchanek, Andrea Throop, Lyndon Tilson, Thomas Urban, Joe Voshell, Kimberly Wagner, Jonathan Williams, Mary Williamson, Qian Zeng, Tricia Zwiefelhofer, Clinton R. Paden, Duncan MacCannell |
| EPI_ISL_1610626, EPI_ISL_1610637                                                                                                                                                                                                                                                                                                                                                                                                                                                                                                                                                                                                                                                                                                                                                                                                                                                                                                                                                                                                                                                                                                                                                                                                                                                                                                                                                                                                                                                                                                                                                                                                            | KEMRI Center for Biotechnology Research and Development                                     | KEMRI-Wellcome Trust Research Programme,Kilifi                                                                                                                                                                                                                                                                                                                                                                                                                                                                                                                                                                                                                                                                                                                                                                                                                                                                                                                                                                                                   | Githinji G.,Mateo D.,Mohamed K.S.,de Laurent Z.,Mburu M.W.,Thiongo K.                                                                                                                                                                                                                                                                                                                                                                                                                                                                                                                                                                                                                                                                                                                                                                                                                                                                                                                                                                            |
| EPI_ISL_1610652, EPI_ISL_1610813, EPI_ISL_1610903, EPI_ISL_1610970, EPI_ISL_1611034, EPI_ISL_1611116, EPI_ISL_1611171, EPI_ISL_1611200, EPI_ISL_1611202, EPI_ISL_1611204, EPI_ISL_1611212, EPI_ISL_1611268, EPI_ISL_1611267, EPI_ISL_1611310, EPI_ISL_1611344, EPI_ISL_1611356, EPI_ISL_1611373, EPI_ISL_1611383, EPI_ISL_1611395, EPI_ISL_1611398, EPI_ISL_1611474, EPI_ISL_1611476, EPI_ISL_1611479, EPI_ISL_1611500, EPI_ISL_1611534, EPI_ISL_1611541, EPI_ISL_1611550, EPI_ISL_1611566, EPI_ISL_1611575, EPI_ISL_1611578, EPI_ISL_1611590, EPI_ISL_1611605, EPI_ISL_1611607, EPI_ISL_1611614, EPI_ISL_1611617, EPI_ISL_1611618, EPI_ISL_1611644, EPI_ISL_1611657, EPI_ISL_1611694, EPI_ISL_1611719, EPI_ISL_1611720, EPI_ISL_1611761, EPI_ISL_1611777, EPI_ISL_1611794, EPI_ISL_1611813, EPI_ISL_1611817, EPI_ISL_1611819, EPI_ISL_1611839, EPI_ISL_1611842, EPI_ISL_1611847, EPI_ISL_1611852, EPI_ISL_1611859, EPI_ISL_1611883, EPI_ISL_1611887, EPI_ISL_1611889, EPI_ISL_1611890, EPI_ISL_1611891, EPI_ISL_1611893, EPI_ISL_1611899, EPI_ISL_1611921, EPI_ISL_1611948, EPI_ISL_1611971, EPI_ISL_1612039, EPI_ISL_1612075, EPI_ISL_1612120, EPI_ISL_1612167, EPI_ISL_1612190, EPI_ISL_1612195, EPI_ISL_1612237, EPI_ISL_1612240, EPI_ISL_1612316, EPI_ISL_1612379, EPI_ISL_1612422, EPI_ISL_1612490, EPI_ISL_1612630, EPI_ISL_1612634, EPI_ISL_1612647, EPI_ISL_1612648, EPI_ISL_1612661, EPI_ISL_1612819, EPI_ISL_1612820                                                                                                                                                                                                             | Centers for Disease Control and Prevention Division of Viral Diseases, Pathogen Discovery   | Dakota Howard, Dhvani Batra, Peter W. Cook, Kara Moser, Adrian Paskey, Jason Caravas, Benjamin Rambo-Martin, Shatavia Morrison, Christopher Gulvick, Scott Sammons, Yvette Unoarumhi, Darlene Wagner, Matthew Schmerer, Minoo Agarwal, Eyad Almasri, Debbie Boles, Ayla Burns, Nuthawin Charoensri, Oren Cohen, Susan Countryman, Mary Ann Cristobal, Bobbi Croy, Suzanne Dale, Hrushikesh Deshmukh, Amanda Douglas, Vincent Drouillon, Marcia Eisenberg, Howard Engler, Rama Ghatti, Prashant Gupta, Susan Hicks, Jake Humphrey, Lax Iyer, Manoj Jain, Mohan Kolli, Brian Krueger, Tim Kuphal, Stanley Letovsky, Michael Levandoski, Craig Lukasik, Jonathan Meltzer, Brian Norvell, Mindy Nye, Scott Parker, Christos Petropoulos, John Pruitt, Steven Ragan, Scott Ryan, Mike Sapeta, Jana Schroth, Suresh Babu Selvaraju, Goran Stevovic, Amanda Suchanek, Andrea Throop, Lyndon Tilson, Thomas Urban, Joe Voshell, Kimberly Wagner, Jonathan Williams, Mary Williamson, Qian Zeng, Tricia Zwiefelhofer, Clinton R. Paden, Duncan MacCannell |                                                                                                                                                                                                                                                                                                                                                                                                                                                                                                                                                                                                                                                                                                                                                                                                                                                                                                                                                                                                                                                  |
| see above                                                                                                                                                                                                                                                                                                                                                                                                                                                                                                                                                                                                                                                                                                                                                                                                                                                                                                                                                                                                                                                                                                                                                                                                                                                                                                                                                                                                                                                                                                                                                                                                                                   | Laboratory Corporation of America                                                           | Centers for Disease Control and Prevention Division of Viral Diseases, Pathogen Discovery                                                                                                                                                                                                                                                                                                                                                                                                                                                                                                                                                                                                                                                                                                                                                                                                                                                                                                                                                        | Tsai, Yan Meng, Doreen Ng, James Xie, Clinton R. Paden, Duncan MacCannell                                                                                                                                                                                                                                                                                                                                                                                                                                                                                                                                                                                                                                                                                                                                                                                                                                                                                                                                                                        |
| EPI_ISL_1612953, EPI_ISL_1613033, EPI_ISL_1613071, EPI_ISL_1613158                                                                                                                                                                                                                                                                                                                                                                                                                                                                                                                                                                                                                                                                                                                                                                                                                                                                                                                                                                                                                                                                                                                                                                                                                                                                                                                                                                                                                                                                                                                                                                          | Fulgent Genetics                                                                            | Centers for Disease Control and Prevention Division of Viral Diseases, Pathogen Discovery                                                                                                                                                                                                                                                                                                                                                                                                                                                                                                                                                                                                                                                                                                                                                                                                                                                                                                                                                        | Dakota Howard, Dhvani Batra, Peter W. Cook, Kara Moser, Adrian Paskey, Jason Caravas, Benjamin Rambo-Martin, Shatavia Morrison, Christopher Gulvick, Scott Sammons, Yvette Unoarumhi, Darlene Wagner, Matthew Schmerer, Harry Gao, Micky Li, John Gao, Joseph Fierro, Benafsh Sapra, Becky Tsai, Yan Meng, Doreen Ng, James Xie, Clinton R. Paden, Duncan MacCannell                                                                                                                                                                                                                                                                                                                                                                                                                                                                                                                                                                                                                                                                             |
| EPI_ISL_1613244                                                                                                                                                                                                                                                                                                                                                                                                                                                                                                                                                                                                                                                                                                                                                                                                                                                                                                                                                                                                                                                                                                                                                                                                                                                                                                                                                                                                                                                                                                                                                                                                                             | BIOR                                                                                        | Latvian Biomedical Research and Study Centre                                                                                                                                                                                                                                                                                                                                                                                                                                                                                                                                                                                                                                                                                                                                                                                                                                                                                                                                                                                                     | Janis Pjalkovskis, Nikita Zrelavs, Monta Ustinova, Ivars Silamikelis, Liga Birzniece, Kaspars Megnis, Una Krumina, Guntars Zarins, Vita Rovite, Lauma Freimane, Laila Silamikele, Laura Ansona, Davids Fridmanis, Elina Dimina, Irena Meistera, Daina Pule, Jurijs Perevoscikovs, Uga Dumppis, Janis Klovins                                                                                                                                                                                                                                                                                                                                                                                                                                                                                                                                                                                                                                                                                                                                     |
| EPI_ISL_1613266                                                                                                                                                                                                                                                                                                                                                                                                                                                                                                                                                                                                                                                                                                                                                                                                                                                                                                                                                                                                                                                                                                                                                                                                                                                                                                                                                                                                                                                                                                                                                                                                                             | Fulgent Genetics                                                                            | Centers for Disease Control and Prevention Division of Viral Diseases, Pathogen Discovery                                                                                                                                                                                                                                                                                                                                                                                                                                                                                                                                                                                                                                                                                                                                                                                                                                                                                                                                                        | Dakota Howard, Dhvani Batra, Peter W. Cook, Kara Moser, Adrian Paskey, Jason Caravas, Benjamin Rambo-Martin, Shatavia Morrison, Christopher Gulvick, Scott Sammons, Yvette Unoarumhi, Darlene Wagner, Matthew Schmerer, Harry Gao, Micky Li, John Gao, Joseph Fierro, Benafsh Sapra, Becky Tsai, Yan Meng, Doreen Ng, James Xie, Clinton R. Paden, Duncan MacCannell                                                                                                                                                                                                                                                                                                                                                                                                                                                                                                                                                                                                                                                                             |

|                                                                                                                                                                                                                                                                                                                                                                     |                                                                                       |                                                                                           |                                                                                                                                                                                                                                                                                                                                                                                                                                                                                                                                                                                                                                                                                                                        |
|---------------------------------------------------------------------------------------------------------------------------------------------------------------------------------------------------------------------------------------------------------------------------------------------------------------------------------------------------------------------|---------------------------------------------------------------------------------------|-------------------------------------------------------------------------------------------|------------------------------------------------------------------------------------------------------------------------------------------------------------------------------------------------------------------------------------------------------------------------------------------------------------------------------------------------------------------------------------------------------------------------------------------------------------------------------------------------------------------------------------------------------------------------------------------------------------------------------------------------------------------------------------------------------------------------|
| EPI_ISL_1613344                                                                                                                                                                                                                                                                                                                                                     | E. Gulbja laboratorija                                                                | Latvian Biomedical Research and Study Centre                                              | Janis Pjalkovskis, Nikita Zrelavs, Monta Ustinova, Ivars Silamikelis, Liga Birzniece, Kaspars Megnis, Una Krumina, Guntars Zarins, Vita Rovite, Lauma Freimane, Laila Silamikele, Laura Ansona, Davids Fridmanis, Elina Dimina, Mikus Gavars, Dmitrijs Perminovs, Juris Perevoscikovs, Uga Dumpis, Janis Klovinis                                                                                                                                                                                                                                                                                                                                                                                                      |
| EPI_ISL_1613432                                                                                                                                                                                                                                                                                                                                                     | LIC                                                                                   | Latvian Biomedical Research and Study Centre                                              | Janis Pjalkovskis, Nikita Zrelavs, Monta Ustinova, Ivars Silamikelis, Liga Birzniece, Kaspars Megnis, Una Krumina, Guntars Zarins, Vita Rovite, Lauma Freimane, Laila Silamikele, Laura Ansona, Davids Fridmanis, Elina Dimina, Reinis Zeltmatis, Diana Dusacka, Juris Perevoscikovs, Uga Dumpis, Janis Klovinis                                                                                                                                                                                                                                                                                                                                                                                                       |
| EPI_ISL_1613553                                                                                                                                                                                                                                                                                                                                                     | E. Gulbja laboratorija                                                                | Latvian Biomedical Research and Study Centre                                              | Janis Pjalkovskis, Nikita Zrelavs, Monta Ustinova, Ivars Silamikelis, Liga Birzniece, Kaspars Megnis, Una Krumina, Guntars Zarins, Vita Rovite, Lauma Freimane, Laila Silamikele, Laura Ansona, Davids Fridmanis, Elina Dimina, Mikus Gavars, Dmitrijs Perminovs, Juris Perevoscikovs, Uga Dumpis, Janis Klovinis                                                                                                                                                                                                                                                                                                                                                                                                      |
| EPI_ISL_1613640                                                                                                                                                                                                                                                                                                                                                     | Fulgent Genetics                                                                      | Centers for Disease Control and Prevention Division of Viral Diseases, Pathogen Discovery | Dakota Howard, Dhvani Batra, Peter W. Cook, Kara Moser, Adrian Paskey, Jason Caravas, Benjamin Rambo-Martin, Shatavia Morrison, Christopher Gulvick, Scott Sammons, Yvette Unoarumhi, Darlene Wagner, Matthew Schmeier, Harry Gao, Mickey Li, John Gao, Joseph Fierro, Benafsh Sapra, Becky Tsai, Yan Meng, Doreen Ng, James Xie, Clinton R. Paden, Duncan MacCannell                                                                                                                                                                                                                                                                                                                                                  |
| EPI_ISL_1613835                                                                                                                                                                                                                                                                                                                                                     | BIOR                                                                                  | Latvian Biomedical Research and Study Centre                                              | Janis Pjalkovskis, Nikita Zrelavs, Monta Ustinova, Ivars Silamikelis, Liga Birzniece, Kaspars Megnis, Una Krumina, Guntars Zarins, Vita Rovite, Lauma Freimane, Laila Silamikele, Laura Ansona, Davids Fridmanis, Elina Dimina, Irena Meistere, Daina Pule, Juris Perevoscikovs, Uga Dumpis, Janis Klovinis                                                                                                                                                                                                                                                                                                                                                                                                            |
| EPI_ISL_1613951, EPI_ISL_1613954, EPI_ISL_1613991, EPI_ISL_1614040, EPI_ISL_1614042, EPI_ISL_1614066, EPI_ISL_1614076, EPI_ISL_1614115, EPI_ISL_1614123, EPI_ISL_1614134, EPI_ISL_1614151, EPI_ISL_1614170, EPI_ISL_1614312, EPI_ISL_1614475, EPI_ISL_1614560, EPI_ISL_1614583, EPI_ISL_1614607, EPI_ISL_1614682, EPI_ISL_1614772, EPI_ISL_1614844, EPI_ISL_1614898 | see above                                                                             | Fulgent Genetics                                                                          | Dakota Howard, Dhvani Batra, Peter W. Cook, Kara Moser, Adrian Paskey, Jason Caravas, Benjamin Rambo-Martin, Shatavia Morrison, Christopher Gulvick, Scott Sammons, Yvette Unoarumhi, Darlene Wagner, Matthew Schmeier, Harry Gao, Mickey Li, John Gao, Joseph Fierro, Benafsh Sapra, Becky Tsai, Yan Meng, Doreen Ng, James Xie, Clinton R. Paden, Duncan MacCannell                                                                                                                                                                                                                                                                                                                                                  |
| EPI_ISL_1614924, EPI_ISL_1614931, EPI_ISL_1614940, EPI_ISL_1614997, EPI_ISL_1615004, EPI_ISL_1615037, EPI_ISL_1615058                                                                                                                                                                                                                                               | see above                                                                             | Quest Diagnostics Incorporated                                                            | Dakota Howard, Dhvani Batra, Peter W. Cook, Kara Moser, Adrian Paskey, Jason Caravas, Benjamin Rambo-Martin, Shatavia Morrison, Christopher Gulvick, Scott Sammons, Yvette Unoarumhi, Darlene Wagner, Matthew Schmeier, S. H. Rosenthal, A. Gerasimova, R. M. Kagan, B. Anderson, M. Hua, Y. Liu, L.E. Bernstein, K.E. Livingston, A. Perez, I. A. Shlyakhter, R. V. Rolando, R. Owen, P. Tanpaiboon, F. Lacbawan, Clinton R. Paden, Duncan MacCannell                                                                                                                                                                                                                                                                 |
| EPI_ISL_1615084, EPI_ISL_1615096, EPI_ISL_1615131, EPI_ISL_1615143, EPI_ISL_1615181, EPI_ISL_1615233, EPI_ISL_1615235, EPI_ISL_1615243, EPI_ISL_1615329, EPI_ISL_1615501, EPI_ISL_1615515                                                                                                                                                                           | see above                                                                             | Helix/Illumina                                                                            | Dakota Howard, Dhvani Batra, Peter W. Cook, Kara Moser, Adrian Paskey, Jason Caravas, Benjamin Rambo-Martin, Shatavia Morrison, Christopher Gulvick, Scott Sammons, Yvette Unoarumhi, Darlene Wagner, Matthew Schmeier, Eileen de Feo, Jan Antico, Christine Tran, Matthew Tolentino, Shannon Wickline, Kim Gietzen, Brad Sickler, Jingtao Liu, Eric Allen, Phil Febbo, Nicole L. Washington, Simon White, Geraint Levan, Kelly Schiabor Barrett, Elizabeth Cirulli, Alexandre Bolze, Ary Ascencio, Charlotte Rivera-Garcia, Ryan Cho, Jason Nguyen, Sherry Wang, Jimmy Ramirez, Tyler Cassens, Efen Sandoval, Magnus Isaksson, William Lee, David Becker, Marc Laurent, James Lu, Clinton R. Paden, Duncan MacCannell |
| EPI_ISL_1615655                                                                                                                                                                                                                                                                                                                                                     | Centre de Recherches Médicales de Lambaréné (CERMEL)                                  | Centre de Recherches Médicales de Lambaréné (CERMEL)                                      | Gédéon Prince Manouana, Georgetin NGUEMA ONDO, Samira ZOA ASSOUMOU, Rodrigue BIKANGUI, Srinivas reddy Pallerla, Arnel MINTSA NDONG, Jean Bernard LEKANA-DOUKI, Joël-Fleury DJOBA SIAWAYA, Bénédicte NDEBOKO, Steffen Borrmann, Thirumalaisamy P. Velavan, Bertrand Leil and Ayola Akim Adegnikia                                                                                                                                                                                                                                                                                                                                                                                                                       |
| EPI_ISL_1615846                                                                                                                                                                                                                                                                                                                                                     | Lighthouse Lab in Milton Keynes                                                       | Wellcome Sanger Institute for the COVID-19 Genomics UK (COG-UK) Consortium                | The Lighthouse Lab in Milton Keynes and Alex Alderton, Roberto Amato, Jeffrey Barrett, Sonia Goncalves, Ewan Harrison, David K. Jackson, Ian Johnston, Dominic Kwiatkowski, Cordelia Langford, John Sillitoe on behalf of the Wellcome Sanger Institute COVID-19 Surveillance Team                                                                                                                                                                                                                                                                                                                                                                                                                                     |
| EPI_ISL_1616973, EPI_ISL_1617167                                                                                                                                                                                                                                                                                                                                    | Colorado Department of Public Health and Environment                                  | Colorado Department of Public Health and Environment                                      | Laura Bankers, Molly C. Hetherington-Rauth, Diana Ir, Shannon Ely, Shannon R. Matzinger, Sarah Elizabeth Totten, Emily A. Travanty                                                                                                                                                                                                                                                                                                                                                                                                                                                                                                                                                                                     |
| EPI_ISL_1620176, EPI_ISL_1620182, EPI_ISL_1620192, EPI_ISL_1620196                                                                                                                                                                                                                                                                                                  | MRCG at LSHTM Genomics lab                                                            | MRCG at LSHTM Genomics lab                                                                | Abdul Karim sesay, Abdoulie Kante, Jarra Manneh, Mariama Kujabi, Bakary Sanyang                                                                                                                                                                                                                                                                                                                                                                                                                                                                                                                                                                                                                                        |
| EPI_ISL_1620458                                                                                                                                                                                                                                                                                                                                                     | Stanford Clinical Virology Laboratory                                                 | Santa Clara County Public Health Laboratory                                               | Santa Clara County Public Health Department                                                                                                                                                                                                                                                                                                                                                                                                                                                                                                                                                                                                                                                                            |
| EPI_ISL_1620550                                                                                                                                                                                                                                                                                                                                                     | Puerto Rico Department of Health                                                      | Centers for Disease Control and Prevention, Dengue Branch                                 | Gilberto A. Santiago, Glenda Gonzalez, Betzabel Flores, Keyla Charriez, Gabriela Paz-Bailey, Jorge L. Munoz-Jordan                                                                                                                                                                                                                                                                                                                                                                                                                                                                                                                                                                                                     |
| EPI_ISL_1620561, EPI_ISL_1620591                                                                                                                                                                                                                                                                                                                                    | Inno Diagnostics/Center for Research Resources, Ponce Medical School Foundation, Inc. | Centers for Disease Control and Prevention, Dengue Branch                                 | Gilberto A. Santiago, Glenda Gonzalez, Betzabel Flores, Keyla Charriez, Andrea Arias-Garcia, Raphael Sanchez-Torres, Vanessa Rivera-Amill, Gabriela Paz-Bailey, Jorge L. Munoz-Jordan                                                                                                                                                                                                                                                                                                                                                                                                                                                                                                                                  |
| EPI_ISL_1620695                                                                                                                                                                                                                                                                                                                                                     | North Dakota Department of Health, Public Health Laboratory                           | North Dakota Department of Health, Public Health Laboratory                               | Lisa Wingerter                                                                                                                                                                                                                                                                                                                                                                                                                                                                                                                                                                                                                                                                                                         |
| EPI_ISL_1621163, EPI_ISL_1621164                                                                                                                                                                                                                                                                                                                                    | Alaska State Virology Laboratory                                                      | Alaska State Virology Laboratory                                                          | Stephanie DeRonde, Elva House, Lisa Smith, Ph.D., Jack Chen, Ph.D.                                                                                                                                                                                                                                                                                                                                                                                                                                                                                                                                                                                                                                                     |
| EPI_ISL_1621229, EPI_ISL_1621231                                                                                                                                                                                                                                                                                                                                    | Texas Children's Hospital                                                             | Texas Children's Microbiome Center                                                        | Ruth Ann Luna, Jennifer K. Spinler, James Dunn, James Versalovic, Ila Singh                                                                                                                                                                                                                                                                                                                                                                                                                                                                                                                                                                                                                                            |
| EPI_ISL_1621323                                                                                                                                                                                                                                                                                                                                                     | LabPLUS                                                                               | Institute of Environmental Science and Research (ESR)                                     | Rachel Boyle, SallyAnn Harbison, Olivia Stroeve, Xiaoyun Ren, Matt Storey, Nikki Freed, Muhammad Faisal, Jing Wang, Hermes Perez, Anja Werner, Antje van der Linden, Arlo Upton, Chris Mansell, David Hammer, Dragana Drinkovic, Gary McAuliffe, Hana Sofia Andersson, James Ussher, Jill Sherwood, Josh Freeman, Julia Howard, Juliet Elvy, Mary DeAlmeida, Matt Blakiston, Matthew Rogers, Max Bloomfield, Michael Addidle, Michelle Balm, Sally Roberts, Sarah Jefferies, Sharmini Muttaiyah, Susan Morpeth, Susan Taylor, Timothy Blackmore, Vani Sathyendran, Veronica Playle, Virginia Hope, Erasmus Smit, Lauren Jelly, Olin Silander, Joep de Ligt                                                             |
| EPI_ISL_1621328                                                                                                                                                                                                                                                                                                                                                     | Hospital of the University of Pennsylvania Molecular Pathology Lab                    | Bushman Lab - University of Pennsylvania                                                  | John Everett, Kyle Rodino, Shantanu Reddy, Pascha Hokama, Aoife M. Roche, Young Hwang, Abigail Glascock, Scott Sherrill-Mix, Samantha A. Whiteside, Jevon Graham-Wooten, Layla A. Khatib, Ayannah S. Fitzgerald, Arupa Ganguly, Mike Feldman, Brendan Kelly, Ronald G. Collman and Frederic Bushman                                                                                                                                                                                                                                                                                                                                                                                                                    |
| EPI_ISL_1621488                                                                                                                                                                                                                                                                                                                                                     | Hospital                                                                              | National Reference Center for Viruses of Respiratory Infections, Institut Pasteur, Paris  | Marion Barbet, Sylvie Behillil, Frédéric Lemoine, Corinne Maufrais, Christophe Malabat, Méline Bizard, Angela Brisebarre, Camille Capel, Louise Lefrançois, Etienne Simon-Lorière, Vincent Enouf, Maud Vanpeene, Sylvie van der Werf, Jérôme Guinard                                                                                                                                                                                                                                                                                                                                                                                                                                                                   |
| EPI_ISL_1621624                                                                                                                                                                                                                                                                                                                                                     | Labo analyses Med                                                                     | National Reference Center for Viruses of Respiratory Infections, Institut Pasteur, Paris  | Marion Barbet, Sylvie Behillil, Frédéric Lemoine, Corinne Maufrais, Christophe Malabat, Méline Bizard, Angela Brisebarre, Camille Capel, Louise Lefrançois, Etienne Simon-Lorière, Vincent Enouf, Maud Vanpeene, Sylvie van der Werf, Anne Holstein                                                                                                                                                                                                                                                                                                                                                                                                                                                                    |
| EPI_ISL_1621732, EPI_ISL_1621749                                                                                                                                                                                                                                                                                                                                    | Quest Diagnostics Incorporated                                                        | Centers for Disease Control and Prevention Division of Viral Diseases, Pathogen Discovery | Dakota Howard, Dhvani Batra, Peter W. Cook, Kara Moser, Adrian Paskey, Jason Caravas, Benjamin Rambo-Martin, Shatavia Morrison, Christopher Gulvick, Scott Sammons, Yvette Unoarumhi, Darlene Wagner, Matthew Schmeier, S. H. Rosenthal, A. Gerasimova, R. M. Kagan, B. Anderson, M. Hua, Y. Liu, L.E. Bernstein, K.E. Livingston, A. Perez, I. A. Shlyakhter, R. V. Rolando, R. Owen, P. Tanpaiboon, F. Lacbawan, Clinton R. Paden, Duncan MacCannell                                                                                                                                                                                                                                                                 |
| EPI_ISL_1621754                                                                                                                                                                                                                                                                                                                                                     | Labo Analyses Med                                                                     | National Reference Center for Viruses of Respiratory Infections, Institut Pasteur, Paris  | Marion Barbet, Sylvie Behillil, Frédéric Lemoine, Corinne Maufrais, Christophe Malabat, Méline Bizard, Angela Brisebarre, Camille Capel, Louise Lefrançois, Etienne Simon-Lorière, Vincent Enouf, Maud Vanpeene, Sylvie van der Werf                                                                                                                                                                                                                                                                                                                                                                                                                                                                                   |
| EPI_ISL_1621783                                                                                                                                                                                                                                                                                                                                                     | Quest Diagnostics Incorporated                                                        | Centers for Disease Control and Prevention Division of Viral Diseases, Pathogen Discovery | Dakota Howard, Dhvani Batra, Peter W. Cook, Kara Moser, Adrian Paskey, Jason Caravas, Benjamin Rambo-Martin, Shatavia Morrison, Christopher Gulvick, Scott Sammons, Yvette Unoarumhi, Darlene Wagner, Matthew Schmeier, S. H. Rosenthal, A. Gerasimova, R. M. Kagan, B. Anderson, M. Hua, Y. Liu, L.E. Bernstein, K.E. Livingston, A. Perez, I. A. Shlyakhter, R. V. Rolando, R. Owen, P. Tanpaiboon, F. Lacbawan, Clinton R. Paden, Duncan MacCannell                                                                                                                                                                                                                                                                 |
| EPI_ISL_1621785                                                                                                                                                                                                                                                                                                                                                     | Labo Analyses med                                                                     | National Reference Center for Viruses of Respiratory Infections, Institut Pasteur, Paris  | Marion Barbet, Sylvie Behillil, Frédéric Lemoine, Corinne Maufrais, Christophe Malabat, Méline Bizard, Angela Brisebarre, Camille Capel, Louise Lefrançois, Etienne Simon-Lorière, Vincent Enouf, Maud Vanpeene, Sylvie van der Werf, Grégoire Potiron                                                                                                                                                                                                                                                                                                                                                                                                                                                                 |
| EPI_ISL_1621786, EPI_ISL_1621801                                                                                                                                                                                                                                                                                                                                    | Quest Diagnostics Incorporated                                                        | Centers for Disease Control and Prevention Division of Viral Diseases, Pathogen Discovery | Dakota Howard, Dhvani Batra, Peter W. Cook, Kara Moser, Adrian Paskey, Jason Caravas, Benjamin Rambo-Martin, Shatavia Morrison, Christopher Gulvick, Scott Sammons, Yvette Unoarumhi, Darlene Wagner, Matthew Schmeier, S. H. Rosenthal, A. Gerasimova, R. M. Kagan, B. Anderson, M. Hua, Y. Liu, L.E. Bernstein, K.E. Livingston, A. Perez, I. A. Shlyakhter, R. V. Rolando, R. Owen, P. Tanpaiboon, F. Lacbawan, Clinton R. Paden, Duncan MacCannell                                                                                                                                                                                                                                                                 |
| EPI_ISL_1621808                                                                                                                                                                                                                                                                                                                                                     | Retirement home                                                                       | National Reference Center for Viruses of Respiratory Infections, Institut Pasteur, Paris  | Marion Barbet, Sylvie Behillil, Frédéric Lemoine, Corinne Maufrais, Christophe Malabat, Méline Bizard, Angela Brisebarre, Camille Capel, Louise Lefrançois, Etienne Simon-Lorière, Vincent Enouf, Maud Vanpeene, Sylvie van der Werf, Sylvie Rossignol                                                                                                                                                                                                                                                                                                                                                                                                                                                                 |

|                                                                                                                                                                                                                                                                                                                                                                                                                                                                                                                                                                                                                                                                                                                                                                                                                                                                                                                                                                                                                                                                                                                                                                                                                     |                                                                                                                                        |                                                                                                                                                                                                  |                                                                                                                                                                                                                                                                                                                                                                                                                                                        |                                                                                                               |
|---------------------------------------------------------------------------------------------------------------------------------------------------------------------------------------------------------------------------------------------------------------------------------------------------------------------------------------------------------------------------------------------------------------------------------------------------------------------------------------------------------------------------------------------------------------------------------------------------------------------------------------------------------------------------------------------------------------------------------------------------------------------------------------------------------------------------------------------------------------------------------------------------------------------------------------------------------------------------------------------------------------------------------------------------------------------------------------------------------------------------------------------------------------------------------------------------------------------|----------------------------------------------------------------------------------------------------------------------------------------|--------------------------------------------------------------------------------------------------------------------------------------------------------------------------------------------------|--------------------------------------------------------------------------------------------------------------------------------------------------------------------------------------------------------------------------------------------------------------------------------------------------------------------------------------------------------------------------------------------------------------------------------------------------------|---------------------------------------------------------------------------------------------------------------|
| EPI_ISL_1621827                                                                                                                                                                                                                                                                                                                                                                                                                                                                                                                                                                                                                                                                                                                                                                                                                                                                                                                                                                                                                                                                                                                                                                                                     | Quest Diagnostics Incorporated                                                                                                         | Centers for Disease Control and Prevention Division of Viral Diseases, Pathogen Discovery                                                                                                        | Dakota Howard, Dhvani Batra, Peter W. Cook, Kara Moser, Adrian Paskey, Jason Caravas, Benjamin Rambo-Martin, Shatavia Morrison, Christopher Gulvick, Scott Sammons, Yvette Unoarumhi, Darlene Wagner, Matthew Schmeier, S. H. Rosenthal, A. Gerasimova, R. M. Kagan, B. Anderson, M. Hua, Y. Liu, L.E. Bernstein, K.E. Livingston, A. Perez, I. A. Shlyakhter, R. V. Rolando, R. Owen, P. Tanpaiboon, F. Lacbawan, Clinton R. Paden, Duncan MacCannell |                                                                                                               |
| EPI_ISL_1621829, EPI_ISL_1621832                                                                                                                                                                                                                                                                                                                                                                                                                                                                                                                                                                                                                                                                                                                                                                                                                                                                                                                                                                                                                                                                                                                                                                                    | Labo Analyses Med                                                                                                                      | National Reference Center for Viruses of Respiratory Infections, Institut Pasteur, Paris                                                                                                         | Marion Barbet, Sylvie Behillili, Frédéric Lemoine, Corinne Maufrais, Christophe Malabat, Méline Bizard, Angela Brisebarre, Camille Capel, Louise Lefrançois, Etienne Simon-Lorière, Vincent Enouf, Maud Vanpeene, Sylvie van der Werf, GréGoire Potiron                                                                                                                                                                                                |                                                                                                               |
| EPI_ISL_1621843                                                                                                                                                                                                                                                                                                                                                                                                                                                                                                                                                                                                                                                                                                                                                                                                                                                                                                                                                                                                                                                                                                                                                                                                     | Hospital                                                                                                                               | National Reference Center for Viruses of Respiratory Infections, Institut Pasteur, Paris                                                                                                         | Marion Barbet, Sylvie Behillili, Frédéric Lemoine, Corinne Maufrais, Christophe Malabat, Méline Bizard, Angela Brisebarre, Camille Capel, Louise Lefrançois, Etienne Simon-Lorière, Vincent Enouf, Maud Vanpeene, Sylvie van der Werf, Ben Hadj Yahia                                                                                                                                                                                                  |                                                                                                               |
| EPI_ISL_1621854, EPI_ISL_1621857, EPI_ISL_1621873, EPI_ISL_1621876, EPI_ISL_1621881, EPI_ISL_1621903, EPI_ISL_1621945, EPI_ISL_1621952, EPI_ISL_1621961, EPI_ISL_1621991, EPI_ISL_1622012, EPI_ISL_1622015, EPI_ISL_1622047, EPI_ISL_1622059, EPI_ISL_1622090, EPI_ISL_1622109, EPI_ISL_1622110                                                                                                                                                                                                                                                                                                                                                                                                                                                                                                                                                                                                                                                                                                                                                                                                                                                                                                                     | Quest Diagnostics Incorporated                                                                                                         | Centers for Disease Control and Prevention Division of Viral Diseases, Pathogen Discovery                                                                                                        | Dakota Howard, Dhvani Batra, Peter W. Cook, Kara Moser, Adrian Paskey, Jason Caravas, Benjamin Rambo-Martin, Shatavia Morrison, Christopher Gulvick, Scott Sammons, Yvette Unoarumhi, Darlene Wagner, Matthew Schmeier, S. H. Rosenthal, A. Gerasimova, R. M. Kagan, B. Anderson, M. Hua, Y. Liu, L.E. Bernstein, K.E. Livingston, A. Perez, I. A. Shlyakhter, R. V. Rolando, R. Owen, P. Tanpaiboon, F. Lacbawan, Clinton R. Paden, Duncan MacCannell |                                                                                                               |
| see above                                                                                                                                                                                                                                                                                                                                                                                                                                                                                                                                                                                                                                                                                                                                                                                                                                                                                                                                                                                                                                                                                                                                                                                                           | Quest Diagnostics Incorporated                                                                                                         | Centers for Disease Control and Prevention Division of Viral Diseases, Pathogen Discovery                                                                                                        | Dakota Howard, Dhvani Batra, Peter W. Cook, Kara Moser, Adrian Paskey, Jason Caravas, Benjamin Rambo-Martin, Shatavia Morrison, Christopher Gulvick, Scott Sammons, Yvette Unoarumhi, Darlene Wagner, Matthew Schmeier, S. H. Rosenthal, A. Gerasimova, R. M. Kagan, B. Anderson, M. Hua, Y. Liu, L.E. Bernstein, K.E. Livingston, A. Perez, I. A. Shlyakhter, R. V. Rolando, R. Owen, P. Tanpaiboon, F. Lacbawan, Clinton R. Paden, Duncan MacCannell |                                                                                                               |
| EPI_ISL_1622205                                                                                                                                                                                                                                                                                                                                                                                                                                                                                                                                                                                                                                                                                                                                                                                                                                                                                                                                                                                                                                                                                                                                                                                                     | University Hospitals of Geneva, Laboratory of Virology                                                                                 | HUG, Laboratory of Virology and the Health2030 Genome Center                                                                                                                                     | Samuel Cordey, Ana Rita Goncalves, Laurent Kaiser, Lorenzo Cerutti, Henri Pegeot, Melyssa Elies, Deborah Penet, Keith Harshman, Ioannis Xenarios, Emmanouil Dermitzakis                                                                                                                                                                                                                                                                                |                                                                                                               |
| EPI_ISL_1622358                                                                                                                                                                                                                                                                                                                                                                                                                                                                                                                                                                                                                                                                                                                                                                                                                                                                                                                                                                                                                                                                                                                                                                                                     | Division of Emerging Infectious Diseases, Bureau of Infectious Diseases Diagnosis Control, Korea Disease Control and Prevention Agency | Division of Emerging Infectious Diseases, Bureau of Infectious Diseases Diagnosis Control, Korea Disease Control and Prevention Agency                                                           | Ae Kyung Park, Il-Hwan Kim, Heui Man Kim, Jeong-Min Kim, Jeong-Ah Kim, Chae Young Lee, Jin Sun No, Eun-Jin Kim                                                                                                                                                                                                                                                                                                                                         |                                                                                                               |
| EPI_ISL_1622717                                                                                                                                                                                                                                                                                                                                                                                                                                                                                                                                                                                                                                                                                                                                                                                                                                                                                                                                                                                                                                                                                                                                                                                                     | Servicio de Microbiología Clínica (Complejo Hospitalario de Navarra, Pamplona)                                                         | Centro de Secuenciación NASERTIC                                                                                                                                                                 | Carmen Ezpeleta Baquedano, Ana Navascués, Ana Miqueleiz                                                                                                                                                                                                                                                                                                                                                                                                |                                                                                                               |
| EPI_ISL_1622879, EPI_ISL_1622884, EPI_ISL_1622893, EPI_ISL_1622897, EPI_ISL_1622898                                                                                                                                                                                                                                                                                                                                                                                                                                                                                                                                                                                                                                                                                                                                                                                                                                                                                                                                                                                                                                                                                                                                 | Arizona State University                                                                                                               | Arizona State University                                                                                                                                                                         | Peter T. Skidmore, LaRinda A. Holland, Rabia Maqsood, Nicholas J. Mellor, Joy M. Blain, Valerie Harris, Joshua LaBaer, Vel Murugan, Efreem S. Lim                                                                                                                                                                                                                                                                                                      |                                                                                                               |
| EPI_ISL_1623071                                                                                                                                                                                                                                                                                                                                                                                                                                                                                                                                                                                                                                                                                                                                                                                                                                                                                                                                                                                                                                                                                                                                                                                                     | Centre Hospitalier Clementel                                                                                                           | CHU Clermont-Ferrand, service de virologie                                                                                                                                                       | Bisseux Maxime, Mirand Audrey, Combes Patricia, Henquell Cécile                                                                                                                                                                                                                                                                                                                                                                                        |                                                                                                               |
| EPI_ISL_1623085                                                                                                                                                                                                                                                                                                                                                                                                                                                                                                                                                                                                                                                                                                                                                                                                                                                                                                                                                                                                                                                                                                                                                                                                     | Centre Hospitalier Universitaire Clermont-Ferrand                                                                                      | CHU Clermont-Ferrand, service de virologie                                                                                                                                                       | Bisseux Maxime, Mirand Audrey, Combes Patricia, Henquell Cécile                                                                                                                                                                                                                                                                                                                                                                                        |                                                                                                               |
| EPI_ISL_1623212, EPI_ISL_1623217                                                                                                                                                                                                                                                                                                                                                                                                                                                                                                                                                                                                                                                                                                                                                                                                                                                                                                                                                                                                                                                                                                                                                                                    | CNR Virus des Infections Respiratoires - France SUD                                                                                    | CNR Virus des Infections Respiratoires - France SUD                                                                                                                                              | Antonin Bal, Gregory Destras, Gwendolynne Burfin, Hadrien Regue, Quentin Semanas, Martine Valette, Bruno Lina, Laurence Josset                                                                                                                                                                                                                                                                                                                         |                                                                                                               |
| EPI_ISL_1623278                                                                                                                                                                                                                                                                                                                                                                                                                                                                                                                                                                                                                                                                                                                                                                                                                                                                                                                                                                                                                                                                                                                                                                                                     | UNILIANS DECINES                                                                                                                       | CNR Virus des Infections Respiratoires - France SUD                                                                                                                                              | Antonin Bal, Gregory Destras, Gwendolynne Burfin, Hadrien Regue, Quentin Semanas, Martine Valette, Bruno Lina, Laurence Josset                                                                                                                                                                                                                                                                                                                         |                                                                                                               |
| EPI_ISL_1623314, EPI_ISL_1623324, EPI_ISL_1623333, EPI_ISL_1623335                                                                                                                                                                                                                                                                                                                                                                                                                                                                                                                                                                                                                                                                                                                                                                                                                                                                                                                                                                                                                                                                                                                                                  | NOVABIO DORDOGNE                                                                                                                       | CNR Virus des Infections Respiratoires - France SUD                                                                                                                                              | Antonin Bal, Gregory Destras, Gwendolynne Burfin, Hadrien Regue, Quentin Semanas, Martine Valette, Bruno Lina, Laurence Josset                                                                                                                                                                                                                                                                                                                         |                                                                                                               |
| EPI_ISL_1623356                                                                                                                                                                                                                                                                                                                                                                                                                                                                                                                                                                                                                                                                                                                                                                                                                                                                                                                                                                                                                                                                                                                                                                                                     | CNR Virus des Infections Respiratoires - France SUD                                                                                    | CNR Virus des Infections Respiratoires - France SUD                                                                                                                                              | Antonin Bal, Gregory Destras, Gwendolynne Burfin, Hadrien Regue, Quentin Semanas, Martine Valette, Bruno Lina, Laurence Josset                                                                                                                                                                                                                                                                                                                         |                                                                                                               |
| EPI_ISL_1623363, EPI_ISL_1623395                                                                                                                                                                                                                                                                                                                                                                                                                                                                                                                                                                                                                                                                                                                                                                                                                                                                                                                                                                                                                                                                                                                                                                                    | CH GIVORS                                                                                                                              | CNR Virus des Infections Respiratoires - France SUD                                                                                                                                              | Antonin Bal, Gregory Destras, Gwendolynne Burfin, Hadrien Regue, Quentin Semanas, Martine Valette, Bruno Lina, Laurence Josset                                                                                                                                                                                                                                                                                                                         |                                                                                                               |
| EPI_ISL_1623421                                                                                                                                                                                                                                                                                                                                                                                                                                                                                                                                                                                                                                                                                                                                                                                                                                                                                                                                                                                                                                                                                                                                                                                                     | CENTRE HOSPITALIER PIERRE OUDOT                                                                                                        | CNR Virus des Infections Respiratoires - France SUD                                                                                                                                              | Antonin Bal, Gregory Destras, Gwendolynne Burfin, Hadrien Regue, Quentin Semanas, Martine Valette, Bruno Lina, Laurence Josset                                                                                                                                                                                                                                                                                                                         |                                                                                                               |
| EPI_ISL_1623423                                                                                                                                                                                                                                                                                                                                                                                                                                                                                                                                                                                                                                                                                                                                                                                                                                                                                                                                                                                                                                                                                                                                                                                                     | CHU GRENOBLE                                                                                                                           | CNR Virus des Infections Respiratoires - France SUD                                                                                                                                              | Antonin Bal, Gregory Destras, Gwendolynne Burfin, Hadrien Regue, Quentin Semanas, Martine Valette, Bruno Lina, Laurence Josset                                                                                                                                                                                                                                                                                                                         |                                                                                                               |
| EPI_ISL_1623469                                                                                                                                                                                                                                                                                                                                                                                                                                                                                                                                                                                                                                                                                                                                                                                                                                                                                                                                                                                                                                                                                                                                                                                                     | CH PERIGUEUX                                                                                                                           | CNR Virus des Infections Respiratoires - France SUD                                                                                                                                              | Antonin Bal, Gregory Destras, Gwendolynne Burfin, Hadrien Regue, Quentin Semanas, Martine Valette, Bruno Lina, Laurence Josset                                                                                                                                                                                                                                                                                                                         |                                                                                                               |
| EPI_ISL_1623477                                                                                                                                                                                                                                                                                                                                                                                                                                                                                                                                                                                                                                                                                                                                                                                                                                                                                                                                                                                                                                                                                                                                                                                                     | CHU TOULOUSE                                                                                                                           | CNR Virus des Infections Respiratoires - France SUD                                                                                                                                              | Antonin Bal, Gregory Destras, Gwendolynne Burfin, Hadrien Regue, Quentin Semanas, Martine Valette, Bruno Lina, Laurence Josset                                                                                                                                                                                                                                                                                                                         |                                                                                                               |
| EPI_ISL_1623485, EPI_ISL_1623512                                                                                                                                                                                                                                                                                                                                                                                                                                                                                                                                                                                                                                                                                                                                                                                                                                                                                                                                                                                                                                                                                                                                                                                    | NOVABIO DORDOGNE                                                                                                                       | CNR Virus des Infections Respiratoires - France SUD                                                                                                                                              | Antonin Bal, Gregory Destras, Gwendolynne Burfin, Hadrien Regue, Quentin Semanas, Martine Valette, Bruno Lina, Laurence Josset                                                                                                                                                                                                                                                                                                                         |                                                                                                               |
| EPI_ISL_1623705                                                                                                                                                                                                                                                                                                                                                                                                                                                                                                                                                                                                                                                                                                                                                                                                                                                                                                                                                                                                                                                                                                                                                                                                     | Oregon State Public Health Laboratory                                                                                                  | Oregon State Public Health Laboratory                                                                                                                                                            | Rafia Razzaque, Eugene Yeboah, Vanda Makris, Laura Tsaknaridis, John Fontana and Shane Sevey                                                                                                                                                                                                                                                                                                                                                           |                                                                                                               |
| EPI_ISL_1623859, EPI_ISL_1623870, EPI_ISL_1623902, EPI_ISL_1623908                                                                                                                                                                                                                                                                                                                                                                                                                                                                                                                                                                                                                                                                                                                                                                                                                                                                                                                                                                                                                                                                                                                                                  | Hospital Universitari Bellvitge                                                                                                        | Microbiology Department                                                                                                                                                                          | Sara Marti, Aida Gonzalez-Diaz, Laura Calatayud, Jordi Niubó, Miguel Fernandez-Huerta, Carmen Ardanuy, Jordi Camara, M Angeles Domínguez                                                                                                                                                                                                                                                                                                               |                                                                                                               |
| EPI_ISL_1624106, EPI_ISL_1624166, EPI_ISL_1624170                                                                                                                                                                                                                                                                                                                                                                                                                                                                                                                                                                                                                                                                                                                                                                                                                                                                                                                                                                                                                                                                                                                                                                   | Illinois Department of Public Health - Springfield Lab                                                                                 | Illinois Department of Public Health - Springfield Lab                                                                                                                                           | Bryan Sim, Gordon McCall                                                                                                                                                                                                                                                                                                                                                                                                                               |                                                                                                               |
| EPI_ISL_1624213                                                                                                                                                                                                                                                                                                                                                                                                                                                                                                                                                                                                                                                                                                                                                                                                                                                                                                                                                                                                                                                                                                                                                                                                     | Naval Infectious Diseases Diagnostic Laboratory                                                                                        | Naval Medical Research Center Biological Defense Research Directorate                                                                                                                            | Logan Voegtly, Catherine Arnold, Bishwo Adhikari, Francisco Malagon Bautista, Andrea Luquette, Gregory Rice, Andrew Bennett, Kyle Lon, Lindsay Glang, Michael Deschenes, Megan Schilling, Victor Sugiharto, Regina Cer, Kimberly Bishop-Lilly                                                                                                                                                                                                          |                                                                                                               |
| EPI_ISL_1624406                                                                                                                                                                                                                                                                                                                                                                                                                                                                                                                                                                                                                                                                                                                                                                                                                                                                                                                                                                                                                                                                                                                                                                                                     | SUNY UPSTATE MEDICAL UNIVERSITY                                                                                                        | Wadsworth Center, New York State Department of Health                                                                                                                                            | Kirsten St. George, Daryl M. Lamson, Alexis Russell, Matthew Shudt, Melissa A Leisner, Jonathan Plitnick, Catharine Prussing, Navjot Singh, John Kelly, Erasmus Schneider, Erica Lasek-Nesselquist                                                                                                                                                                                                                                                     |                                                                                                               |
| EPI_ISL_1624410, EPI_ISL_1624418, EPI_ISL_1624422, EPI_ISL_1624423, EPI_ISL_1624428, EPI_ISL_1624429, EPI_ISL_1624432, EPI_ISL_1624434, EPI_ISL_1624437, EPI_ISL_1624439, EPI_ISL_1624454, EPI_ISL_1624455, EPI_ISL_1624462, EPI_ISL_1624463, EPI_ISL_1624471, EPI_ISL_1624474                                                                                                                                                                                                                                                                                                                                                                                                                                                                                                                                                                                                                                                                                                                                                                                                                                                                                                                                      | URMC LABS                                                                                                                              | Wadsworth Center, New York State Department of Health                                                                                                                                            | Kirsten St. George, Daryl M. Lamson, Alexis Russell, Matthew Shudt, Melissa A Leisner, Jonathan Plitnick, Catharine Prussing, Navjot Singh, John Kelly, Erasmus Schneider, Erica Lasek-Nesselquist                                                                                                                                                                                                                                                     |                                                                                                               |
| EPI_ISL_1624494, EPI_ISL_1624525, EPI_ISL_1624613, EPI_ISL_1624669                                                                                                                                                                                                                                                                                                                                                                                                                                                                                                                                                                                                                                                                                                                                                                                                                                                                                                                                                                                                                                                                                                                                                  | Massachusetts State Public Health Laboratory                                                                                           | Massachusetts State Public Health Laboratory                                                                                                                                                     | Andrew Lang, Timelia Fink, Glen Gallagher, Sandra Smole                                                                                                                                                                                                                                                                                                                                                                                                |                                                                                                               |
| EPI_ISL_1624840                                                                                                                                                                                                                                                                                                                                                                                                                                                                                                                                                                                                                                                                                                                                                                                                                                                                                                                                                                                                                                                                                                                                                                                                     | Berkeley Medical Center                                                                                                                | WVU and Marshall University Combined Genomics Core Facilities                                                                                                                                    | James Denvir, Peter Stoilov, Peter Perrotta, Wesley Kimble, Ryan Percifield                                                                                                                                                                                                                                                                                                                                                                            |                                                                                                               |
| EPI_ISL_1624865                                                                                                                                                                                                                                                                                                                                                                                                                                                                                                                                                                                                                                                                                                                                                                                                                                                                                                                                                                                                                                                                                                                                                                                                     | QLabs                                                                                                                                  | WVU and Marshall University Combined Genomics Core Facilities                                                                                                                                    | James Denvir, Peter Stoilov, Peter Perrotta, Wesley Kimble, Ryan Percifield                                                                                                                                                                                                                                                                                                                                                                            |                                                                                                               |
| EPI_ISL_1625458, EPI_ISL_1625459                                                                                                                                                                                                                                                                                                                                                                                                                                                                                                                                                                                                                                                                                                                                                                                                                                                                                                                                                                                                                                                                                                                                                                                    | National Laboratory for Health, Environment and Food, OMM, Koper                                                                       | NLZOH (National Laboratory for Health, Environment and Food) / CISLD (Clinical Institute of Special Laboratory Diagnostics), University Children's Hospital, University Medical Center Ljubljana | Sandra Janezic, Aleksander Mahnic, Maja Rupnik, Tjasa Žohar retrnik, Alenka Štorman, Nika Gobec, Aleksander Kocuvan, Kaja Tominc, Maša Jari, Gašper Strugar, Tina Cvetkovi, Mitja Rak / Jernej Kova, Barbara Jenko Bizjan, Tine Tesovnik, Robert Šket, Katarina Kozmos, Ana Grom, Maruša Debeljak, Marko Pokorn, Tadej Battelino                                                                                                                       |                                                                                                               |
| EPI_ISL_1625541, EPI_ISL_1625542, EPI_ISL_1625543, EPI_ISL_1625545, EPI_ISL_1625546, EPI_ISL_1625547, EPI_ISL_1625548, EPI_ISL_1625549, EPI_ISL_1625550, EPI_ISL_1625551, EPI_ISL_1625553, EPI_ISL_1625554, EPI_ISL_1625555, EPI_ISL_1625556, EPI_ISL_1625557, EPI_ISL_1625558, EPI_ISL_1625559, EPI_ISL_1625560, EPI_ISL_1625561, EPI_ISL_1625562, EPI_ISL_1625563, EPI_ISL_1625565, EPI_ISL_1625566, EPI_ISL_1625567, EPI_ISL_1625568, EPI_ISL_1625569, EPI_ISL_1625570, EPI_ISL_1625571, EPI_ISL_1625572, EPI_ISL_1625573, EPI_ISL_1625574, EPI_ISL_1625575, EPI_ISL_1625576, EPI_ISL_1625577, EPI_ISL_1625578, EPI_ISL_1625579, EPI_ISL_1625580, EPI_ISL_1625582, EPI_ISL_1625583, EPI_ISL_1625584, EPI_ISL_1625585, EPI_ISL_1625586, EPI_ISL_1625587, EPI_ISL_1625588, EPI_ISL_1625589, EPI_ISL_1625590, EPI_ISL_1625591, EPI_ISL_1625592, EPI_ISL_1625593, EPI_ISL_1625594, EPI_ISL_1625595, EPI_ISL_1625596, EPI_ISL_1625597, EPI_ISL_1625598, EPI_ISL_1625599, EPI_ISL_1625600, EPI_ISL_1625601, EPI_ISL_1625602, EPI_ISL_1625603, EPI_ISL_1625604, EPI_ISL_1625605, EPI_ISL_1625606, EPI_ISL_1625607, EPI_ISL_1625608, EPI_ISL_1625611, EPI_ISL_1625613, EPI_ISL_1625614, EPI_ISL_1625615, EPI_ISL_1625677 | The Jackson Laboratory                                                                                                                 | The Jackson Laboratory                                                                                                                                                                           | Bergeron D, Renzette N, Adams M, Omerza G, Kelly K, Long J, Li L                                                                                                                                                                                                                                                                                                                                                                                       |                                                                                                               |
| EPI_ISL_1625836, EPI_ISL_1625842, EPI_ISL_1625863, EPI_ISL_1625865, EPI_ISL_1625873, EPI_ISL_1625874, EPI_ISL_1625877, EPI_ISL_1625878, EPI_ISL_1625879, EPI_ISL_1625889, EPI_ISL_1625901, EPI_ISL_1625902, EPI_ISL_1625904, EPI_ISL_1625905, EPI_ISL_1625910                                                                                                                                                                                                                                                                                                                                                                                                                                                                                                                                                                                                                                                                                                                                                                                                                                                                                                                                                       | see above                                                                                                                              | NJDOH, Public Health and Environmental Laboratories                                                                                                                                              | NJ_PHEL                                                                                                                                                                                                                                                                                                                                                                                                                                                | Lindsey Bodnar, Shiv K. Verma, Jacquelyn Deverell, Matthew Scarnati, Mohammad M Ali, Dana Woell, Byeong Jeong |
| EPI_ISL_1626188, EPI_ISL_1626219, EPI_ISL_1626480                                                                                                                                                                                                                                                                                                                                                                                                                                                                                                                                                                                                                                                                                                                                                                                                                                                                                                                                                                                                                                                                                                                                                                   | Wisconsin State Laboratory of Hygiene Communicable Disease Division                                                                    | Wisconsin State Laboratory of Hygiene Communicable Disease Division                                                                                                                              | Kelsey R. Florek, Abigail C. Shockey                                                                                                                                                                                                                                                                                                                                                                                                                   |                                                                                                               |
| EPI_ISL_1626546                                                                                                                                                                                                                                                                                                                                                                                                                                                                                                                                                                                                                                                                                                                                                                                                                                                                                                                                                                                                                                                                                                                                                                                                     | Nebraska Public Health Laboratory                                                                                                      | NPHL COVID-19 Response Team                                                                                                                                                                      | NPHL COVID-19 Response Team                                                                                                                                                                                                                                                                                                                                                                                                                            |                                                                                                               |
| EPI_ISL_1626609                                                                                                                                                                                                                                                                                                                                                                                                                                                                                                                                                                                                                                                                                                                                                                                                                                                                                                                                                                                                                                                                                                                                                                                                     | LDSP Caldas                                                                                                                            | Instituto Nacional de Salud- Dirección de Investigación en                                                                                                                                       | Katherine Laiton-Donato, Diego A. Álvarez-Díaz, Carlos Franco-Muñoz, Hector Alejandro Ruiz-Moreno, Paola Rojas, Maria T. Herrera-Sepúlveda, Jorge                                                                                                                                                                                                                                                                                                      |                                                                                                               |

|                                                                                                                                                                                                                                                                                                 |                                                                                                           | Salud Pública                                                                                                              |                                                                                                                                                                                                                                                                                                                                                                                                                                                                  |
|-------------------------------------------------------------------------------------------------------------------------------------------------------------------------------------------------------------------------------------------------------------------------------------------------|-----------------------------------------------------------------------------------------------------------|----------------------------------------------------------------------------------------------------------------------------|------------------------------------------------------------------------------------------------------------------------------------------------------------------------------------------------------------------------------------------------------------------------------------------------------------------------------------------------------------------------------------------------------------------------------------------------------------------|
|                                                                                                                                                                                                                                                                                                 |                                                                                                           |                                                                                                                            | Rivera, Diego Andrés Prada, Jhonnatan Reales-González, Sheryll Corchuelo, Julian Naizaque, Gerardo Santamaría, Sergio Gomez, Lisseth Pardo, Juan Camilo Martínez, Marta Lopez Blanco, Ángela Alarcon Cruz, Diana Malo, Carmen Osorio, Magdalena Wiesner, Martha Lucia Ospina Martínez, Marcela Mercado-Reyes                                                                                                                                                     |
| EPI_ISL_1626610                                                                                                                                                                                                                                                                                 | Gencore - Universidad de los Andes                                                                        | Gencore - Universidad de los Andes                                                                                         | Luisa Sacristan, David Gonzalez, Cristian Barrera, Gabriela Ariza, Silvia Restrepo, Erica Salguero, Marcela Guevara, Ana María Palacio                                                                                                                                                                                                                                                                                                                           |
| EPI_ISL_1626617                                                                                                                                                                                                                                                                                 | Laboratorio de Salud Pública Bogota                                                                       | Gencore - Universidad de los Andes                                                                                         | Luisa Sacristan, David Gonzalez, Silvia Restrepo, Marcela Guevara, Ana María Palacio, Johana Hernandez, Gabriela Delgado, Alejandro Gomez                                                                                                                                                                                                                                                                                                                        |
| EPI_ISL_1626754                                                                                                                                                                                                                                                                                 | Institute of Virology, Biomedical Research Center of the Slovak Academy of Sciences, Bratislava           | Faculty of Natural Sciences, Comenius University, Bratislava                                                               | Viktoria Cabanova, Kristina Borsova, Brona Brejova, Viktoria Hodorova, Sabina Fumacova Havlikova, Juraj Kopacek, Martina Lickova, Lubomira Lukacikova, Martina Nebohacova, Monika Slavikova, Tomas Vinar, Jozef Nosek, Boris Klempa                                                                                                                                                                                                                              |
| EPI_ISL_1626761, EPI_ISL_1626778                                                                                                                                                                                                                                                                | Institute of Virology, Biomedical Research Center of the Slovak Academy of Sciences, Bratislava           | Faculty of Natural Sciences, Comenius University, Bratislava                                                               | Kristina Borsova, Viktoria Cabanova, Brona Brejova, Viktoria Hodorova, Sabina Fumacova Havlikova, Juraj Kopacek, Martina Lickova, Lubomira Lukacikova, Martina Nebohacova, Monika Slavikova, Tomas Vinar, Boris Klempa, Jozef Nosek                                                                                                                                                                                                                              |
| EPI_ISL_1626792                                                                                                                                                                                                                                                                                 | Clinical Reference Laboratory                                                                             | Kansas Health and Environmental Lab                                                                                        | Mike Grose, Jonathan Barnell, Ben Olsen, and Phil Adam                                                                                                                                                                                                                                                                                                                                                                                                           |
| EPI_ISL_1626797, EPI_ISL_1626801                                                                                                                                                                                                                                                                | LESP Chihuahua                                                                                            | Instituto de Diagnostico y Referencia Epidemiologicos (INDRE)                                                              | Claudia Wong-Arambula, Abril Rodriguez-Maldonado, Vanessa Rivero-Arredondo, Ariadna Medina-Benitez, Joaquin Quiroz-Mercado, Sergio Rangel-Guerrero, Natividad Cruz-Ortiz, Tatiana Nunez-Garcia, Gisela Barrera-Badillo, Lucia Hernandez-Rivas, Irma Lopez-Martinez, Ernesto Ramirez-Gonzalez.                                                                                                                                                                    |
| EPI_ISL_1626802                                                                                                                                                                                                                                                                                 | LESP Yucatan                                                                                              | Instituto de Diagnostico y Referencia Epidemiologicos (INDRE)                                                              | Claudia Wong-Arambula, Abril Rodriguez-Maldonado, Vanessa Rivero-Arredondo, Ariadna Medina-Benitez, Joaquin Quiroz-Mercado, Sergio Rangel-Guerrero, Natividad Cruz-Ortiz, Tatiana Nunez-Garcia, Gisela Barrera-Badillo, Lucia Hernandez-Rivas, Irma Lopez-Martinez, Ernesto Ramirez-Gonzalez.                                                                                                                                                                    |
| EPI_ISL_1626803, EPI_ISL_1626804                                                                                                                                                                                                                                                                | LESP Chihuahua                                                                                            | Instituto de Diagnostico y Referencia Epidemiologicos (INDRE)                                                              | Claudia Wong-Arambula, Abril Rodriguez-Maldonado, Vanessa Rivero-Arredondo, Ariadna Medina-Benitez, Joaquin Quiroz-Mercado, Sergio Rangel-Guerrero, Natividad Cruz-Ortiz, Tatiana Nunez-Garcia, Gisela Barrera-Badillo, Lucia Hernandez-Rivas, Irma Lopez-Martinez, Ernesto Ramirez-Gonzalez.                                                                                                                                                                    |
| EPI_ISL_1626806                                                                                                                                                                                                                                                                                 | LESP Nuevo Leon                                                                                           | Instituto de Diagnostico y Referencia Epidemiologicos (INDRE)                                                              | Claudia Wong-Arambula, Abril Rodriguez-Maldonado, Vanessa Rivero-Arredondo, Ariadna Medina-Benitez, Joaquin Quiroz-Mercado, Sergio Rangel-Guerrero, Natividad Cruz-Ortiz, Tatiana Nunez-Garcia, Gisela Barrera-Badillo, Lucia Hernandez-Rivas, Irma Lopez-Martinez, Ernesto Ramirez-Gonzalez.                                                                                                                                                                    |
| EPI_ISL_1626807                                                                                                                                                                                                                                                                                 | LESP Ciudad de Mexico                                                                                     | Instituto de Diagnostico y Referencia Epidemiologicos (INDRE)                                                              | Claudia Wong-Arambula, Abril Rodriguez-Maldonado, Vanessa Rivero-Arredondo, Ariadna Medina-Benitez, Joaquin Quiroz-Mercado, Sergio Rangel-Guerrero, Natividad Cruz-Ortiz, Tatiana Nunez-Garcia, Gisela Barrera-Badillo, Lucia Hernandez-Rivas, Irma Lopez-Martinez, Ernesto Ramirez-Gonzalez.                                                                                                                                                                    |
| EPI_ISL_1626808                                                                                                                                                                                                                                                                                 | LESP Hidalgo                                                                                              | Instituto de Diagnostico y Referencia Epidemiologicos (INDRE)                                                              | Claudia Wong-Arambula, Abril Rodriguez-Maldonado, Vanessa Rivero-Arredondo, Ariadna Medina-Benitez, Joaquin Quiroz-Mercado, Sergio Rangel-Guerrero, Natividad Cruz-Ortiz, Tatiana Nunez-Garcia, Gisela Barrera-Badillo, Lucia Hernandez-Rivas, Irma Lopez-Martinez, Ernesto Ramirez-Gonzalez.                                                                                                                                                                    |
| EPI_ISL_1626882                                                                                                                                                                                                                                                                                 | WI State Laboratory of Hygiene                                                                            | Genomics and Discovery, Respiratory Viruses Branch, Division of Viral Diseases, Centers for Disease Control and Prevention | Jing Zhang, Yan Li, Brian Lynch, Anna Kelleher, Krista Queen, Anna Uehara, Peter Cook, Han Jia Justin Ng, Ying Tao, Clinton R. Paden, Haibin Wang, Suxiang Tong                                                                                                                                                                                                                                                                                                  |
| EPI_ISL_1626945, EPI_ISL_1626953                                                                                                                                                                                                                                                                | Global Health Research Complex                                                                            | TIGSS                                                                                                                      | Benjamin W. Neuman, Melissa M. Kahl-Mcdonagh, Kurt A. Zuelke, Charlie D. Johnson, Allison Ficht, Sankar P. Chaki, Sierra Guidry, Joshua Hill, Richard Metz, Marcel Brun                                                                                                                                                                                                                                                                                          |
| EPI_ISL_1626955                                                                                                                                                                                                                                                                                 | Global Health Research Complex                                                                            | TxGen                                                                                                                      | Benjamin W. Neuman, Melissa M. Kahl-Mcdonagh, Kurt A. Zuelke, Charlie D. Johnson, Allison Ficht, Sankar P. Chaki, Sierra Guidry, Joshua Hill, Richard Metz, Marcel Brun                                                                                                                                                                                                                                                                                          |
| EPI_ISL_1627204, EPI_ISL_1627213, EPI_ISL_1627214, EPI_ISL_1627215, EPI_ISL_1627220, EPI_ISL_1627224, EPI_ISL_1627227, EPI_ISL_1627228, EPI_ISL_1627229, EPI_ISL_1627230, EPI_ISL_1627234, EPI_ISL_1627235, EPI_ISL_1627237, EPI_ISL_1627238, EPI_ISL_1627245, EPI_ISL_1627246, EPI_ISL_1627250 |                                                                                                           |                                                                                                                            |                                                                                                                                                                                                                                                                                                                                                                                                                                                                  |
| see above                                                                                                                                                                                                                                                                                       | Wojewodzka Stacja Sanitarno-Epidemiologiczna w Olsztynie, Laboratorium Badan Epidemiologiczno-Klinicznych | Wojewodzka Stacja Sanitarno-Epidemiologiczna w Olsztynie, Laboratorium Badan Epidemiologiczno-Klinicznych                  | Sylvia Krzetowska, Monika Czerminska, Ewa Liszewska, Tomasz Jakubczak, Marta Lukian, Patryk Bielecki, Aleksandra Kobiato, Emilia Tarabas, Paulina Rozycka, Barbara Dolinska                                                                                                                                                                                                                                                                                      |
| EPI_ISL_1627252, EPI_ISL_1627282                                                                                                                                                                                                                                                                | North Dakota Department of Health, Public Health Laboratory                                               | North Dakota Department of Health, Public Health Laboratory                                                                | Lisa Wingerter                                                                                                                                                                                                                                                                                                                                                                                                                                                   |
| EPI_ISL_1627343                                                                                                                                                                                                                                                                                 | Presidio di Brindisi Di Summa - Perrino                                                                   | Istituto Zooprofilattico Sperimentale della Puglia e della Basilicata                                                      | Paris A., Bianco A., Capozzi L., Del Sambro L., Simone D., Difato L., Santoro A., Ridolfi D., Giannico A.                                                                                                                                                                                                                                                                                                                                                        |
| EPI_ISL_1627430                                                                                                                                                                                                                                                                                 | Baylor Scott & White-Temple                                                                               | Baylor Scott & White-Temple                                                                                                | Ari Rao, Linden Morales, Kimberly Walker, Marcus Volz, Shelby Hendrickson, Caitlin Maloney                                                                                                                                                                                                                                                                                                                                                                       |
| EPI_ISL_1627561, EPI_ISL_1627575, EPI_ISL_1627576, EPI_ISL_1627577                                                                                                                                                                                                                              | Pathogenic Microorganisms Variability Laboratory                                                          | WHO National Influenza Centre Russian Federation                                                                           | Andrey Komissarov, Artem Fadeev, Kseniya Komissarova, Daria Danilenko, Ksenia Safina, Elena Nabieva, Georgii Bazykin, Nadezhda Kuznetsova, Elena Shidlovskaya, Elizaveta Divisenko, Alina Odintsova, Lyudmila Vasilchenko, Alexey Shchetinin, Andrei Siniavin, Maria Nikiforova, Andrey Pochtoviy, Evgeny Usachev, Olga Burgasova, Ludmila Kolobukhina, Svetlana Smetanina, Artem Tkachuk, Vladimir Gushchin, Denis Logunov, Alexander Gintsburg, Dmitry Lioznov |
| EPI_ISL_1627653                                                                                                                                                                                                                                                                                 | Laboratorium Diagnostyczne Centrum Medycznego Luxmed                                                      | 1. National Institute of Public Health - National Institute of Hygiene; 2. Eurofins Genomics Europe Sequencing GmbH        | Wokowicz Tomasz, Zacharczuk Katarzyna, Sadkowska-Todys Magorzata, Gierczyki Rafa, Eurofins Genomics Europe Sequencing Team, ECDC COVID-19 WGS support team                                                                                                                                                                                                                                                                                                       |
| EPI_ISL_1627708                                                                                                                                                                                                                                                                                 | LABORATORIUM BADA KLINICZNYCH WSSE w OPOLU                                                                | 1. National Institute of Public Health - National Institute of Hygiene; 2. Eurofins Genomics Europe Sequencing GmbH        | Wokowicz Tomasz, Zacharczuk Katarzyna, Sadkowska-Todys Magorzata, Gierczyki Rafa, Eurofins Genomics Europe Sequencing Team, ECDC COVID-19 WGS support team                                                                                                                                                                                                                                                                                                       |
| EPI_ISL_1627764                                                                                                                                                                                                                                                                                 | Laboratorium Analiz Lekarskich Alab Rzeszów                                                               | 1. National Institute of Public Health - National Institute of Hygiene; 2. Eurofins Genomics Europe Sequencing GmbH        | Wokowicz Tomasz, Zacharczuk Katarzyna, Sadkowska-Todys Magorzata, Gierczyki Rafa, Eurofins Genomics Europe Sequencing Team, ECDC COVID-19 WGS support team                                                                                                                                                                                                                                                                                                       |
| EPI_ISL_1627768                                                                                                                                                                                                                                                                                 | Centrum Medyczne MEDYK Sp. z o.o., Sp.k. Zakad Diagnostyki Medycznej                                      | 1. National Institute of Public Health - National Institute of Hygiene; 2. Eurofins Genomics Europe Sequencing GmbH        | Wokowicz Tomasz, Zacharczuk Katarzyna, Sadkowska-Todys Magorzata, Gierczyki Rafa, Eurofins Genomics Europe Sequencing Team, ECDC COVID-19 WGS support team                                                                                                                                                                                                                                                                                                       |
| EPI_ISL_1627865                                                                                                                                                                                                                                                                                 | Labolatorium Biologii Molekularnej USK                                                                    | 1. National Institute of Public Health - National Institute of Hygiene; 2. Eurofins Genomics Europe Sequencing GmbH        | Wokowicz Tomasz, Zacharczuk Katarzyna, Sadkowska-Todys Magorzata, Gierczyki Rafa, Eurofins Genomics Europe Sequencing Team, ECDC COVID-19 WGS support team                                                                                                                                                                                                                                                                                                       |
| EPI_ISL_1627867                                                                                                                                                                                                                                                                                 | Diagnostyka                                                                                               | 1. National Institute of Public Health - National Institute of Hygiene; 2. Eurofins Genomics Europe Sequencing GmbH        | Wokowicz Tomasz, Zacharczuk Katarzyna, Sadkowska-Todys Magorzata, Gierczyki Rafa, Eurofins Genomics Europe Sequencing Team, ECDC COVID-19 WGS support team                                                                                                                                                                                                                                                                                                       |
| EPI_ISL_1627872                                                                                                                                                                                                                                                                                 | Laboratorium Medyczne LAB-MED                                                                             | 1. National Institute of Public Health - National Institute of Hygiene; 2. Eurofins Genomics Europe Sequencing GmbH        | Wokowicz Tomasz, Zacharczuk Katarzyna, Sadkowska-Todys Magorzata, Gierczyki Rafa, Eurofins Genomics Europe Sequencing Team, ECDC COVID-19 WGS support team                                                                                                                                                                                                                                                                                                       |
| EPI_ISL_1627901                                                                                                                                                                                                                                                                                 | Szpital Uniwersytecki im. Karola Marcinkowskiego                                                          | 1. National Institute of Public Health - National Institute of Hygiene; 2. Eurofins Genomics Europe Sequencing GmbH        | Wokowicz Tomasz, Zacharczuk Katarzyna, Sadkowska-Todys Magorzata, Gierczyki Rafa, Eurofins Genomics Europe Sequencing Team, ECDC COVID-19 WGS support team                                                                                                                                                                                                                                                                                                       |
| EPI_ISL_1627933                                                                                                                                                                                                                                                                                 | Podkarpackie Centrum Genetyczne OncoGenLab Pracownia Diagnostyki Molekularnej                             | 1. National Institute of Public Health - National Institute of Hygiene; 2. Eurofins Genomics Europe Sequencing GmbH        | Wokowicz Tomasz, Zacharczuk Katarzyna, Sadkowska-Todys Magorzata, Gierczyki Rafa, Eurofins Genomics Europe Sequencing Team, ECDC COVID-19 WGS support team                                                                                                                                                                                                                                                                                                       |
| EPI_ISL_1628483, EPI_ISL_1628486                                                                                                                                                                                                                                                                | University of Mississippi Medical Center, Department of Pathology                                         | University of Mississippi Medical Center, Molecular and Genomics Core Facility                                             | Ashley C. Johnson, Ithiel J. Frame, Krishna K. Ayyalasomayajula, Michael R. Garrett, D. Ashley Robinson                                                                                                                                                                                                                                                                                                                                                          |
| EPI_ISL_1628767, EPI_ISL_1628893                                                                                                                                                                                                                                                                | REUNILAB                                                                                                  | UMR PIMIT                                                                                                                  | Dr David A Wilkinson, Dr Patrick Mavingui, Dr Camille Lebarbenchon, Magali Turpin                                                                                                                                                                                                                                                                                                                                                                                |
| EPI_ISL_1629072                                                                                                                                                                                                                                                                                 | CHU                                                                                                       | UMR PIMIT                                                                                                                  | Dr David A Wilkinson, Dr Patrick Mavingui, Dr Camille Lebarbenchon, Magali Turpin                                                                                                                                                                                                                                                                                                                                                                                |
| EPI_ISL_1629272, EPI_ISL_1629315                                                                                                                                                                                                                                                                | REUNILAB                                                                                                  | UMR PIMIT                                                                                                                  | Dr David A Wilkinson, Dr Patrick Mavingui, Dr Camille Lebarbenchon, Magali Turpin                                                                                                                                                                                                                                                                                                                                                                                |
| EPI_ISL_1629819, EPI_ISL_1629887,                                                                                                                                                                                                                                                               | Istituto Zooprofilattico Sperimentale del Mezzogiorno                                                     | TIGEM                                                                                                                      | Antonio Grimaldi Patrizia Annunziata Francesco Panariello Biancamaria Pierri Claudia Tiberio Teresa Giuliano Valentina Bouche Chiara Colantuono Maria                                                                                                                                                                                                                                                                                                            |



|                                                                                                                                                                                                                                                                                                                                                                                                                                                                                                                                                                                                                                                                                                                                                                                                                                                                                                                                                                                                                                           |                                                                                                                |                                                                                                                                                                                           |                                                                                                                                                                                                                                                                                                                                                                                                                                                        |
|-------------------------------------------------------------------------------------------------------------------------------------------------------------------------------------------------------------------------------------------------------------------------------------------------------------------------------------------------------------------------------------------------------------------------------------------------------------------------------------------------------------------------------------------------------------------------------------------------------------------------------------------------------------------------------------------------------------------------------------------------------------------------------------------------------------------------------------------------------------------------------------------------------------------------------------------------------------------------------------------------------------------------------------------|----------------------------------------------------------------------------------------------------------------|-------------------------------------------------------------------------------------------------------------------------------------------------------------------------------------------|--------------------------------------------------------------------------------------------------------------------------------------------------------------------------------------------------------------------------------------------------------------------------------------------------------------------------------------------------------------------------------------------------------------------------------------------------------|
| EPI_ISL_1647334, EPI_ISL_1647335                                                                                                                                                                                                                                                                                                                                                                                                                                                                                                                                                                                                                                                                                                                                                                                                                                                                                                                                                                                                          | Servizo de Microbioloxía. Complexo Hospitalario de Santiago de Compostela                                      | Servizo de Microbioloxía. Complexo Hospitalario de Santiago de Compostela                                                                                                                 | Xosé Costa, Iria Roca, Antonio Aguilera, Gema Barbeito, Amparo Coira, Carlos García_Riestra, Manuela Hernández, José Llovo, Teresa Lopez_Valiño, Laura Millán, Daniel Navarro, Rocío trastoy, Mercedes Treviño, María Luisa Pérez_del_Molino                                                                                                                                                                                                           |
| EPI_ISL_1647652, EPI_ISL_1647687, EPI_ISL_1647699, EPI_ISL_1647762                                                                                                                                                                                                                                                                                                                                                                                                                                                                                                                                                                                                                                                                                                                                                                                                                                                                                                                                                                        | Public Health Authority of the Slovak Republic                                                                 | Laboratory of Genomics and Bioinformatics, Comenius University Science Park                                                                                                               | Tatiana Sedláková, Diana Rusáková, Miroslav Böhmer, Anna Giová, Jaroslav Budiš, Tomáš Szemes                                                                                                                                                                                                                                                                                                                                                           |
| EPI_ISL_1647779, EPI_ISL_1647802, EPI_ISL_1647824, EPI_ISL_1647943                                                                                                                                                                                                                                                                                                                                                                                                                                                                                                                                                                                                                                                                                                                                                                                                                                                                                                                                                                        | Hospital General Universitario Gregorio Marañón                                                                | Hospital General Universitario Gregorio Marañón                                                                                                                                           | Sergio Buenestado Serrano, Pedro Sola Campoy, Laura Pérez-Lago, Cristina Rodríguez-Grande, Pilar Catalán, Patricia Muñoz, Darío García de Viedma                                                                                                                                                                                                                                                                                                       |
| EPI_ISL_1648063, EPI_ISL_1648076                                                                                                                                                                                                                                                                                                                                                                                                                                                                                                                                                                                                                                                                                                                                                                                                                                                                                                                                                                                                          | IN State Department of Health Laboratory Services                                                              | IN State Department of Health Laboratory Services                                                                                                                                         | Cassandra Campion, Jamie Yeadon, Brian Pope, Lixia Liu, Kyle Brownlee, Melissa Hindenlang, Ankita Kashikar, Mark Glazier                                                                                                                                                                                                                                                                                                                               |
| EPI_ISL_1648086, EPI_ISL_1648087, EPI_ISL_1648096, EPI_ISL_1648099, EPI_ISL_1648102, EPI_ISL_1648107, EPI_ISL_1648112, EPI_ISL_1648115, EPI_ISL_1648121                                                                                                                                                                                                                                                                                                                                                                                                                                                                                                                                                                                                                                                                                                                                                                                                                                                                                   | NJDOH, Public Health and Environmental Laboratories                                                            | NJ_PHEL                                                                                                                                                                                   | Lindsey Bodnar, Shiv K. Verma, Jacquelyn Deverell, Matthew Scarnati, Dana Woell, Byeong Jeong                                                                                                                                                                                                                                                                                                                                                          |
| EPI_ISL_1648202, EPI_ISL_1648243, EPI_ISL_1648304, EPI_ISL_1648362, EPI_ISL_1648432, EPI_ISL_1648437, EPI_ISL_1648461, EPI_ISL_1648507, EPI_ISL_1648528, EPI_ISL_1648561, EPI_ISL_1648587, EPI_ISL_1648637, EPI_ISL_1648757, EPI_ISL_1648760, EPI_ISL_1648771, EPI_ISL_1648778, EPI_ISL_1648810, EPI_ISL_1648833, EPI_ISL_1648842, EPI_ISL_1648885                                                                                                                                                                                                                                                                                                                                                                                                                                                                                                                                                                                                                                                                                        | Quest Diagnostics Incorporated                                                                                 | Centers for Disease Control and Prevention Division of Viral Diseases, Pathogen Discovery                                                                                                 | Dakota Howard, Dhvani Batra, Peter W. Cook, Kara Moser, Adrian Paskey, Jason Caravas, Benjamin Rambo-Martin, Shatavia Morrison, Christopher Gulvick, Scott Sammons, Yvette Unoarumhi, Darlene Wagner, Matthew Schmerer, S. H. Rosenthal, A. Gerasimova, R. M. Kagan, B. Anderson, M. Hua, Y. Liu, L.E. Bernstein, K.E. Livingston, A. Perez, I. A. Shlyakhter, R. V. Rolando, R. Owen, P. Tanpaiboon, F. Lacbawan, Clinton R. Paden, Duncan MacCannell |
| EPI_ISL_1648973, EPI_ISL_1648991, EPI_ISL_1648993, EPI_ISL_1648994, EPI_ISL_1649037, EPI_ISL_1649071, EPI_ISL_1649073, EPI_ISL_1649105, EPI_ISL_1649119, EPI_ISL_1649142, EPI_ISL_1649168, EPI_ISL_1649176, EPI_ISL_1649188, EPI_ISL_1649297, EPI_ISL_1649320, EPI_ISL_1649324, EPI_ISL_1649351, EPI_ISL_1649363, EPI_ISL_1649415, EPI_ISL_1649443, EPI_ISL_1649443, EPI_ISL_1649453, EPI_ISL_1649474, EPI_ISL_1649588, EPI_ISL_1649619, EPI_ISL_1649669, EPI_ISL_1649681, EPI_ISL_1649732, EPI_ISL_1649743, EPI_ISL_1649770, EPI_ISL_1649775, EPI_ISL_1649799                                                                                                                                                                                                                                                                                                                                                                                                                                                                            | Aegis Sciences Corporation                                                                                     | Centers for Disease Control and Prevention Division of Viral Diseases, Pathogen Discovery                                                                                                 | Dakota Howard, Dhvani Batra, Peter W. Cook, Kara Moser, Adrian Paskey, Jason Caravas, Benjamin Rambo-Martin, Shatavia Morrison, Christopher Gulvick, Scott Sammons, Yvette Unoarumhi, Darlene Wagner, Matthew Schmerer, Cyndi Clark, Patrick Campbell, Rob Case, Vikramsinhha Ghorpade, Holly Houdeshell, Ola Kvalvaag, Dillon Nall, Ethan Sanders, Alec Vest, Shaun Westlund, Matthew Hardison, Clinton R. Paden, Duncan MacCannell                   |
| EPI_ISL_1649814                                                                                                                                                                                                                                                                                                                                                                                                                                                                                                                                                                                                                                                                                                                                                                                                                                                                                                                                                                                                                           | Laboratory of Clinical Microbiology, Virology and Bioemergencies, ASST Fatebenefratelli Sacco - Sacco Hospital | Laboratory of Clinical Microbiology, Virology and Bioemergencies, ASST Fatebenefratelli Sacco - Sacco Hospital                                                                            | Valeria Micheli, Alessandro Mancon, Alberto Rizzo, Fiorenza Bracchitta, Luca Rizzuto, Maria Rita Gismondo                                                                                                                                                                                                                                                                                                                                              |
| EPI_ISL_1649825, EPI_ISL_1649970, EPI_ISL_1649971, EPI_ISL_1649987, EPI_ISL_1650005, EPI_ISL_1650032, EPI_ISL_1650060, EPI_ISL_1650079, EPI_ISL_1650121, EPI_ISL_1650122, EPI_ISL_1650129, EPI_ISL_1650144, EPI_ISL_1650183, EPI_ISL_1650187, EPI_ISL_1650189, EPI_ISL_1650222, EPI_ISL_1650233, EPI_ISL_1650241, EPI_ISL_1650243, EPI_ISL_1650253, EPI_ISL_1650312, EPI_ISL_1650321, EPI_ISL_1650326, EPI_ISL_1650360, EPI_ISL_1650363, EPI_ISL_1650395, EPI_ISL_1650397, EPI_ISL_1650443, EPI_ISL_1650446, EPI_ISL_1650465, EPI_ISL_1650502, EPI_ISL_1650513, EPI_ISL_1650567, EPI_ISL_1650602, EPI_ISL_1650620, EPI_ISL_1650633, EPI_ISL_1650649, EPI_ISL_1650655, EPI_ISL_1650711, EPI_ISL_1650755, EPI_ISL_1650784, EPI_ISL_1650833, EPI_ISL_1650840, EPI_ISL_1650875, EPI_ISL_1650911, EPI_ISL_1650912, EPI_ISL_1650921, EPI_ISL_1650930, EPI_ISL_1650934, EPI_ISL_1650940, EPI_ISL_1650950, EPI_ISL_1650974, EPI_ISL_1651005, EPI_ISL_1651012, EPI_ISL_1651020, EPI_ISL_1651055, EPI_ISL_1651056, EPI_ISL_1651122, EPI_ISL_1651128 | Aegis Sciences Corporation                                                                                     | Centers for Disease Control and Prevention Division of Viral Diseases, Pathogen Discovery                                                                                                 |                                                                                                                                                                                                                                                                                                                                                                                                                                                        |
| EPI_ISL_1651297                                                                                                                                                                                                                                                                                                                                                                                                                                                                                                                                                                                                                                                                                                                                                                                                                                                                                                                                                                                                                           | GA Department of Public Health                                                                                 | GA Department of Public Health                                                                                                                                                            | Stacy Reeves, Jonathan Edwards, Cynthia Dixey, Tonia Parrott, Aliyah Fields, Taylor Smith                                                                                                                                                                                                                                                                                                                                                              |
| EPI_ISL_1651627, EPI_ISL_1651689                                                                                                                                                                                                                                                                                                                                                                                                                                                                                                                                                                                                                                                                                                                                                                                                                                                                                                                                                                                                          | University of Michigan Clinical Microbiology Laboratory                                                        | Lauring Lab, University of Michigan, Department of Microbiology and Immunology                                                                                                            | Valesano                                                                                                                                                                                                                                                                                                                                                                                                                                               |
| EPI_ISL_1651932                                                                                                                                                                                                                                                                                                                                                                                                                                                                                                                                                                                                                                                                                                                                                                                                                                                                                                                                                                                                                           | Cell-t                                                                                                         | 1. Academic Center for Pathomorphological and Genetic-Molecular Diagnostics ltd, Bialystok, Poland 2. National Institute of Public Health - National Institute of Hygiene, Warsaw, Poland | Radosaw Charkiewicz, Jacek Nikliski, Przemyslaw Biecek. Joanna Resze, Piotr Majewski, Anetta Sulewska, Piotr Karabowicz, Joanna Kiluk, Janusz Dzcio, Konrad Raczkowski, Katarzyna Zacharczuk, Magdalena Nowakowska, Magorzata Sadkowska-Todys, Tomasz Wokowicz                                                                                                                                                                                         |
| EPI_ISL_1651937                                                                                                                                                                                                                                                                                                                                                                                                                                                                                                                                                                                                                                                                                                                                                                                                                                                                                                                                                                                                                           | WSSE w Gdasku                                                                                                  | 1. Academic Center for Pathomorphological and Genetic-Molecular Diagnostics ltd, Bialystok, Poland 2. National Institute of Public Health - National Institute of Hygiene, Warsaw, Poland | Radosaw Charkiewicz, Jacek Nikliski, Przemyslaw Biecek. Joanna Resze, Piotr Majewski, Anetta Sulewska, Piotr Karabowicz, Joanna Kiluk, Janusz Dzcio, Konrad Raczkowski, Katarzyna Zacharczuk, Magdalena Nowakowska, Magorzata Sadkowska-Todys, Tomasz Wokowicz                                                                                                                                                                                         |
| EPI_ISL_1651945, EPI_ISL_1651946, EPI_ISL_1651948, EPI_ISL_1651952, EPI_ISL_1651955, EPI_ISL_1651957                                                                                                                                                                                                                                                                                                                                                                                                                                                                                                                                                                                                                                                                                                                                                                                                                                                                                                                                      | Cell-t                                                                                                         | 1. Academic Center for Pathomorphological and Genetic-Molecular Diagnostics ltd, Bialystok, Poland 2. National Institute of Public Health - National Institute of Hygiene, Warsaw, Poland | Radosaw Charkiewicz, Jacek Nikliski, Przemyslaw Biecek. Joanna Resze, Piotr Majewski, Anetta Sulewska, Piotr Karabowicz, Joanna Kiluk, Janusz Dzcio, Konrad Raczkowski, Katarzyna Zacharczuk, Magdalena Nowakowska, Magorzata Sadkowska-Todys, Tomasz Wokowicz                                                                                                                                                                                         |
| EPI_ISL_1651964                                                                                                                                                                                                                                                                                                                                                                                                                                                                                                                                                                                                                                                                                                                                                                                                                                                                                                                                                                                                                           | Laboratorium Diagnostyczne Centrum Medycznego Luxmed                                                           | 1. Academic Center for Pathomorphological and Genetic-Molecular Diagnostics ltd, Bialystok, Poland 2. National Institute of Public Health - National Institute of Hygiene, Warsaw, Poland | Radosaw Charkiewicz, Jacek Nikliski, Przemyslaw Biecek. Joanna Resze, Piotr Majewski, Anetta Sulewska, Piotr Karabowicz, Joanna Kiluk, Janusz Dzcio, Konrad Raczkowski, Katarzyna Zacharczuk, Magdalena Nowakowska, Magorzata Sadkowska-Todys, Tomasz Wokowicz                                                                                                                                                                                         |
| EPI_ISL_1651979                                                                                                                                                                                                                                                                                                                                                                                                                                                                                                                                                                                                                                                                                                                                                                                                                                                                                                                                                                                                                           | Dzia Diagnostyka Laboratoryjnej Pracownia Biologii Molekularnej                                                | 1. Academic Center for Pathomorphological and Genetic-Molecular Diagnostics ltd, Bialystok, Poland 2. National Institute of Public Health - National Institute of Hygiene, Warsaw, Poland | Radosaw Charkiewicz, Jacek Nikliski, Przemyslaw Biecek. Joanna Resze, Piotr Majewski, Anetta Sulewska, Piotr Karabowicz, Joanna Kiluk, Janusz Dzcio, Konrad Raczkowski, Katarzyna Zacharczuk, Magdalena Nowakowska, Magorzata Sadkowska-Todys, Tomasz Wokowicz                                                                                                                                                                                         |
| EPI_ISL_1651992                                                                                                                                                                                                                                                                                                                                                                                                                                                                                                                                                                                                                                                                                                                                                                                                                                                                                                                                                                                                                           | Zakad Diagnostyki Molekularnej Nowotworów Dolnolskie Centrum Onkologii                                         | 1. Academic Center for Pathomorphological and Genetic-Molecular Diagnostics ltd, Bialystok, Poland 2. National Institute of Public Health - National Institute of Hygiene, Warsaw, Poland | Radosaw Charkiewicz, Jacek Nikliski, Przemyslaw Biecek. Joanna Resze, Piotr Majewski, Anetta Sulewska, Piotr Karabowicz, Joanna Kiluk, Janusz Dzcio, Konrad Raczkowski, Katarzyna Zacharczuk, Magdalena Nowakowska, Magorzata Sadkowska-Todys, Tomasz Wokowicz                                                                                                                                                                                         |
| EPI_ISL_1651999                                                                                                                                                                                                                                                                                                                                                                                                                                                                                                                                                                                                                                                                                                                                                                                                                                                                                                                                                                                                                           | Laboratorium Mikrobiologiczne Dolnolskie Centrum Transplantacji Komórkowych z Krajowym Bankiem Dawców Szpiku   | 1. Academic Center for Pathomorphological and Genetic-Molecular Diagnostics ltd, Bialystok, Poland 2. National Institute of Public Health - National Institute of Hygiene, Warsaw, Poland | Radosaw Charkiewicz, Jacek Nikliski, Przemyslaw Biecek. Joanna Resze, Piotr Majewski, Anetta Sulewska, Piotr Karabowicz, Joanna Kiluk, Janusz Dzcio, Konrad Raczkowski, Katarzyna Zacharczuk, Magdalena Nowakowska, Magorzata Sadkowska-Todys, Tomasz Wokowicz                                                                                                                                                                                         |
| EPI_ISL_1652010, EPI_ISL_1652012, EPI_ISL_1652013                                                                                                                                                                                                                                                                                                                                                                                                                                                                                                                                                                                                                                                                                                                                                                                                                                                                                                                                                                                         | Diagnostyka Sp. Z o.o.                                                                                         | 1. Academic Center for Pathomorphological and Genetic-Molecular Diagnostics ltd, Bialystok, Poland 2. National Institute of Public Health - National Institute of Hygiene, Warsaw, Poland | Radosaw Charkiewicz, Jacek Nikliski, Przemyslaw Biecek. Joanna Resze, Piotr Majewski, Anetta Sulewska, Piotr Karabowicz, Joanna Kiluk, Janusz Dzcio, Konrad Raczkowski, Katarzyna Zacharczuk, Magdalena Nowakowska, Magorzata Sadkowska-Todys, Tomasz Wokowicz                                                                                                                                                                                         |
| EPI_ISL_1652028                                                                                                                                                                                                                                                                                                                                                                                                                                                                                                                                                                                                                                                                                                                                                                                                                                                                                                                                                                                                                           | NZOZ Meditest Diagnostyka Medyczna                                                                             | 1. Academic Center for Pathomorphological and Genetic-Molecular Diagnostics ltd, Bialystok, Poland 2. National Institute of Public Health - National Institute of Hygiene, Warsaw, Poland | Radosaw Charkiewicz, Jacek Nikliski, Przemyslaw Biecek. Joanna Resze, Piotr Majewski, Anetta Sulewska, Piotr Karabowicz, Joanna Kiluk, Janusz Dzcio, Konrad Raczkowski, Katarzyna Zacharczuk, Magdalena Nowakowska, Magorzata Sadkowska-Todys, Tomasz Wokowicz                                                                                                                                                                                         |
| EPI_ISL_1652031                                                                                                                                                                                                                                                                                                                                                                                                                                                                                                                                                                                                                                                                                                                                                                                                                                                                                                                                                                                                                           | Zakad Genetyki Synevo                                                                                          | 1. Academic Center for Pathomorphological and Genetic-Molecular Diagnostics ltd, Bialystok, Poland 2. National Institute of Public Health - National Institute of Hygiene, Warsaw, Poland | Radosaw Charkiewicz, Jacek Nikliski, Przemyslaw Biecek. Joanna Resze, Piotr Majewski, Anetta Sulewska, Piotr Karabowicz, Joanna Kiluk, Janusz Dzcio, Konrad Raczkowski, Katarzyna Zacharczuk, Magdalena Nowakowska, Magorzata Sadkowska-Todys, Tomasz Wokowicz                                                                                                                                                                                         |

|                                                                                                                                                                                                                                                                                |                                                                                                                     |                                                                                                                                                                                           |                                                                                                                                                                                                                                                                                                                                                                                                                                                                          |
|--------------------------------------------------------------------------------------------------------------------------------------------------------------------------------------------------------------------------------------------------------------------------------|---------------------------------------------------------------------------------------------------------------------|-------------------------------------------------------------------------------------------------------------------------------------------------------------------------------------------|--------------------------------------------------------------------------------------------------------------------------------------------------------------------------------------------------------------------------------------------------------------------------------------------------------------------------------------------------------------------------------------------------------------------------------------------------------------------------|
| EPI_ISL_1652079                                                                                                                                                                                                                                                                | Regionálne Centrum Krviadawstwa i Krwiolecznictwa w Biaymstoku Pracownia Diagnostyki Molekularnej wirusa SARS-CoV-2 | 1. Academic Center for Pathomorphological and Genetic-Molecular Diagnostics ltd, Bialystok, Poland 2. National Institute of Public Health - National Institute of Hygiene, Warsaw, Poland | Radosaw Charkiewicz, Jacek Nikliski, Przemyslaw Biecek. Joanna Resze, Piotr Majewski, Anetta Sulewska, Piotr Karabowicz, Joanna Kiluk, Janusz Dzioico, Konrad Raczkowski, Katarzyna Zacharczuk, Magdalena Nowakowska, Magorzata Sadkowska-Todys, Tomasz Wokowicz                                                                                                                                                                                                         |
| EPI_ISL_1652082                                                                                                                                                                                                                                                                | Wichita State University - Molecular Diagnostics Lab                                                                | Kansas Health and Environmental Lab                                                                                                                                                       | Mike Grose, Jonathan Barnell, Ben Olsen, and Phil Adam                                                                                                                                                                                                                                                                                                                                                                                                                   |
| EPI_ISL_1652470                                                                                                                                                                                                                                                                | Illinois Department of Public Health                                                                                | Gagnon Lab, Southern Illinois University                                                                                                                                                  | Keith Gagnon                                                                                                                                                                                                                                                                                                                                                                                                                                                             |
| EPI_ISL_1652540, EPI_ISL_1652595, EPI_ISL_1652606, EPI_ISL_1652612, EPI_ISL_1652625                                                                                                                                                                                            | HELIX LLC                                                                                                           | WHO National Influenza Centre Russian Federation                                                                                                                                          | Andrey Komissarov, Artem Fadeev, Anna Ivanova, Kseniya Komissarova, Tamila Musaeva, Maria Timofeeva, Veronika Eder, Maria Pisareva, Daria Danilenko, Ksenia Safina, Elena Nabieva, Georgii Bazynkin, Dmitry Lioznov                                                                                                                                                                                                                                                      |
| EPI_ISL_1652750                                                                                                                                                                                                                                                                | Lighthouse Lab in Alderley Park                                                                                     | Wellcome Sanger Institute for the COVID-19 Genomics UK (COG-UK) Consortium                                                                                                                | Jacquelyn Wynn, Mairead Hyland, The Lighthouse Lab in Alderley Park and Alex Alderton, Roberto Amato, Jeffrey Barrett, Sonia Goncalves, Ewan Harrison, David K. Jackson, Ian Johnston, Dominic Kwiatkowski, Cordelia Langford, John Sillitoe on behalf of the Wellcome Sanger Institute COVID-19 Surveillance Team                                                                                                                                                       |
| EPI_ISL_1652961, EPI_ISL_1653427                                                                                                                                                                                                                                               | Lighthouse Lab in Glasgow                                                                                           | Wellcome Sanger Institute for the COVID-19 Genomics UK (COG-UK) Consortium                                                                                                                | Harper VanSteenhouse, Yumi Kasai, David Gray, Carol Clugston, Anna Dominiczak and Alex Alderton, Roberto Amato, Jeffrey Barrett, Sonia Goncalves, Ewan Harrison, David K. Jackson, Ian Johnston, Dominic Kwiatkowski, Cordelia Langford, John Sillitoe on behalf of the Wellcome Sanger Institute COVID-19 Surveillance Team                                                                                                                                             |
| EPI_ISL_1653447                                                                                                                                                                                                                                                                | Lighthouse Lab in Alderley Park                                                                                     | Wellcome Sanger Institute for the COVID-19 Genomics UK (COG-UK) Consortium                                                                                                                | Jacquelyn Wynn, Mairead Hyland, The Lighthouse Lab in Alderley Park and Alex Alderton, Roberto Amato, Jeffrey Barrett, Sonia Goncalves, Ewan Harrison, David K. Jackson, Ian Johnston, Dominic Kwiatkowski, Cordelia Langford, John Sillitoe on behalf of the Wellcome Sanger Institute COVID-19 Surveillance Team                                                                                                                                                       |
| EPI_ISL_1653771, EPI_ISL_1653778, EPI_ISL_1653779, EPI_ISL_1653788                                                                                                                                                                                                             | Southern Nevada Public Health Laboratory                                                                            | Southern Nevada Public Health Laboratory                                                                                                                                                  | Michael Picker                                                                                                                                                                                                                                                                                                                                                                                                                                                           |
| EPI_ISL_1653925                                                                                                                                                                                                                                                                | DNA Solution Ltd.                                                                                                   | Genomic Research Lab, BCSIR                                                                                                                                                               | Tanjina Akhter Banu, Md. Murshed Hasan Sarkar, Mohammad Samir Uzzaman, Eshrar Osman, Md. Ahasan Habib, Shahina Akter, Abu Sayeed Mohammad Mahmud, Barna Goswami, Iffat Jahan, Md. Saddam Hossain, Mohammad Mohi Uddin, Mohammad Fazle Alam Rabbi, Md Firoz Kabir, Kazi Nadim Hasan, Md. Mizanur Rahman, Md. Abdul Khaleque, Sharif Akhteruzzamani, Md. Salim Khan                                                                                                        |
| EPI_ISL_1654577, EPI_ISL_1654588, EPI_ISL_1654610, EPI_ISL_1654620, EPI_ISL_1654622, EPI_ISL_1654629, EPI_ISL_1654637, EPI_ISL_1654640                                                                                                                                         | NYU Langone Health                                                                                                  | Departments of Pathology and Medicine, New York University School of Medicine                                                                                                             | Adriana Heguy, Dacia Dimartino, Emily Guzman, Christian Marier, Peter Meyn, Sitharam Ramaswami, Gael Westby, Paul Zappile, Yutong Zhang, Paolo Cotzia, Guiqing Wang                                                                                                                                                                                                                                                                                                      |
| EPI_ISL_1654815, EPI_ISL_1654827, EPI_ISL_1654829, EPI_ISL_1654832, EPI_ISL_1654836, EPI_ISL_1654838                                                                                                                                                                           | Institute of Virology, Vaccines and Sera "Torlak"                                                                   | Institute of microbiology and Immunology, Faculty of Medicine, University of Belgrade                                                                                                     | Knezevic,A., Jankovic,M., Vidanovic,D., Milicevic,O., Tesovic,B., Sekler,M., Jovanovic,T.                                                                                                                                                                                                                                                                                                                                                                                |
| EPI_ISL_1654842                                                                                                                                                                                                                                                                | Laboratory for COVID19 diagnostics, Clinical Centre of Serbia                                                       | Institute of microbiology and Immunology, Faculty of Medicine, University of Belgrade                                                                                                     | Knezevic,A., Jankovic,M., Vidanovic,D., Milicevic,O., Tesovic,B., Sekler,M., Jovanovic,T.                                                                                                                                                                                                                                                                                                                                                                                |
| EPI_ISL_1654909                                                                                                                                                                                                                                                                | NMVRVI                                                                                                              | National Public Health Surveillance Laboratory                                                                                                                                            | Lukas Zemaitis, Migle Gabrielaite, Jelena Razmuk, Svajune Muralyte, Ana Steponkiene, Lukas Vasionis, Danas Baksa                                                                                                                                                                                                                                                                                                                                                         |
| EPI_ISL_1655258, EPI_ISL_1655315, EPI_ISL_1655328, EPI_ISL_1655331, EPI_ISL_1655342, EPI_ISL_1655348, EPI_ISL_1655357, EPI_ISL_1655393, EPI_ISL_1655448, EPI_ISL_1655461, EPI_ISL_1655464, EPI_ISL_1655466, EPI_ISL_1655506, EPI_ISL_1655513, EPI_ISL_1655527, EPI_ISL_1655553 | see above                                                                                                           | Synlab Haut de France                                                                                                                                                                     | UMR 8199/1283 EGID                                                                                                                                                                                                                                                                                                                                                                                                                                                       |
| EPI_ISL_1656195, EPI_ISL_1656230, EPI_ISL_1656259, EPI_ISL_1656283, EPI_ISL_1656383                                                                                                                                                                                            | Istituto Zooprofilattico Sperimentale del Mezzogiorno                                                               | TIGEM                                                                                                                                                                                     | Derhourhi Mehdi                                                                                                                                                                                                                                                                                                                                                                                                                                                          |
| EPI_ISL_1656663, EPI_ISL_1656708                                                                                                                                                                                                                                               | Synlab Haut de France                                                                                               | UMR 8199/1283 EGID                                                                                                                                                                        | Mehdi Derhourhi                                                                                                                                                                                                                                                                                                                                                                                                                                                          |
| EPI_ISL_1656822                                                                                                                                                                                                                                                                | Public Health Authority of the Slovak Republic                                                                      | Laboratory of Genomics and Bioinformatics, Comenius University Science Park                                                                                                               | Tatiana Sedláková, Diana Rusáková, Miroslav Böhmer, Anna Giová, Jaroslav Budiš, Tomáš Szemes                                                                                                                                                                                                                                                                                                                                                                             |
| EPI_ISL_1656893                                                                                                                                                                                                                                                                | NMVRVI                                                                                                              | National Public Health Surveillance Laboratory                                                                                                                                            | Lukas Zemaitis, Ingrida Olen draite, Arnoldas Pautienius, Kamile Tamauskaite, Dovydas Gecys, Laura Pareckaite, Vaiva Lesauskaite, Astra Vitkauskiene                                                                                                                                                                                                                                                                                                                     |
| EPI_ISL_1657098                                                                                                                                                                                                                                                                | National Institute of Infectious Diseases-Prof. Dr. Matei Bals Molecular Diagnostics Laboratory                     | National Institute of Infectious Diseases-Prof. Dr. Matei Bals Molecular Diagnostics Laboratory                                                                                           | Corina Casanguiu, Leontina Banica, Marius Surleac, Ovidiu Vlaicu, Andreea Tudor, Simona Paraschiv, Dan Otelea                                                                                                                                                                                                                                                                                                                                                            |
| EPI_ISL_1657103, EPI_ISL_1657109                                                                                                                                                                                                                                               | Department of Public Health Bucharest                                                                               | National Institute of Infectious Diseases-Prof. Dr. Matei Bals Molecular Diagnostics Laboratory                                                                                           | Corina Casanguiu, Leontina Banica, Marius Surleac, Ovidiu Vlaicu, Andreea Tudor, Simona Paraschiv, Dan Otelea                                                                                                                                                                                                                                                                                                                                                            |
| EPI_ISL_1657112                                                                                                                                                                                                                                                                | National Institute of Infectious Diseases-Prof. Dr. Matei Bals Molecular Diagnostics Laboratory                     | National Institute of Infectious Diseases-Prof. Dr. Matei Bals Molecular Diagnostics Laboratory                                                                                           | Corina Casanguiu, Leontina Banica, Marius Surleac, Ovidiu Vlaicu, Andreea Tudor, Simona Paraschiv, Dan Otelea                                                                                                                                                                                                                                                                                                                                                            |
| EPI_ISL_1657119, EPI_ISL_1657120, EPI_ISL_1657121                                                                                                                                                                                                                              | Department of Public Health Bucharest                                                                               | National Institute of Infectious Diseases-Prof. Dr. Matei Bals Molecular Diagnostics Laboratory                                                                                           | Corina Casanguiu, Leontina Banica, Marius Surleac, Ovidiu Vlaicu, Andreea Tudor, Simona Paraschiv, Dan Otelea                                                                                                                                                                                                                                                                                                                                                            |
| EPI_ISL_1658083, EPI_ISL_1658119, EPI_ISL_1658172                                                                                                                                                                                                                              | Viollier AG                                                                                                         | Department of Biosystems Science and Engineering, ETH Zurich                                                                                                                              | Christian Beisel, Sarah Nadeau, Chaoran Chen, Ivan Topolsky, Philipp Jablonski, Lara Fuhrmann, David Dreifuss, Katharina Jahn, Rebecca Denes, Mirjam Feldkamp, Ina Nissen, Natascha Santacroce, Elodie Burcklen, Christiane Beckmann, Maurice Redondo, Olivier Kobel, Christoph Noppen, Sophie Seidel, Noemie Santamaria de Souza, Niko Beerenwinkel, Tanja Stadler                                                                                                      |
| EPI_ISL_1658819                                                                                                                                                                                                                                                                | Viollier AG                                                                                                         | Department of Biosystems Science and Engineering, ETH Zurich                                                                                                                              | Chaoran Chen, Sarah Nadeau, Ivan Topolsky, Emmanouil Dermizakis, Keith Harshman, Ioannis Xenarios, Henri Pegeot, Lorenzo Cerutti, Deborah Penet, Philipp Jablonski, Lara Fuhrmann, David Dreifuss, Katharina Jahn, Christiane Beckmann, Maurice Redondo, Olivier Kobel, Christoph Noppen, Sophie Seidel, Noemie Santamaria de Souza, Niko Beerenwinkel, Tanja Stadler                                                                                                    |
| EPI_ISL_1658978                                                                                                                                                                                                                                                                | Viollier AG                                                                                                         | Department of Biosystems Science and Engineering, ETH Zurich                                                                                                                              | Chaoran Chen, Sarah Nadeau, Catharine Aquino, Ivan Topolsky, Philipp Jablonski, Lara Fuhrmann, David Dreifuss, Katharina Jahn, Andreia Cabral de Gouvea, Maria Domenica Moccia, Simon Gruter, Timothy Sykes, Lennart Opitz, Griffin White, Laura Neff, Doris Popovic, Andrea Patrignani, Jay Tracy, Ralph Schlapbach, Christiane Beckmann, Maurice Redondo, Olivier Kobel, Christoph Noppen, Sophie Seidel, Noemie Santamaria de Souza, Niko Beerenwinkel, Tanja Stadler |
| EPI_ISL_1659022, EPI_ISL_1659045, EPI_ISL_1659061                                                                                                                                                                                                                              | Viollier AG                                                                                                         | Department of Biosystems Science and Engineering, ETH Zurich                                                                                                                              | Chaoran Chen, Sarah Nadeau, Ivan Topolsky, Emmanouil Dermizakis, Keith Harshman, Ioannis Xenarios, Henri Pegeot, Lorenzo Cerutti, Deborah Penet, Philipp Jablonski, Lara Fuhrmann, David Dreifuss, Katharina Jahn, Christiane Beckmann, Maurice Redondo, Olivier Kobel, Christoph Noppen, Sophie Seidel, Noemie Santamaria de Souza, Niko Beerenwinkel, Tanja Stadler                                                                                                    |
| EPI_ISL_1659212                                                                                                                                                                                                                                                                | Viollier AG                                                                                                         | Department of Biosystems Science and Engineering, ETH Zurich                                                                                                                              | Chaoran Chen, Sarah Nadeau, Catharine Aquino, Ivan Topolsky, Philipp Jablonski, Lara Fuhrmann, David Dreifuss, Katharina Jahn, Andreia Cabral de Gouvea, Maria Domenica Moccia, Simon Gruter, Timothy Sykes, Lennart Opitz, Griffin White, Laura Neff, Doris Popovic, Andrea Patrignani, Jay Tracy, Ralph Schlapbach, Christiane Beckmann, Maurice Redondo, Olivier Kobel, Christoph Noppen, Sophie Seidel, Noemie Santamaria de Souza, Niko Beerenwinkel, Tanja Stadler |
| EPI_ISL_1659549                                                                                                                                                                                                                                                                | WSSE w Gdasku                                                                                                       | 1. Academic Center for Pathomorphological and Genetic-Molecular Diagnostics ltd, Bialystok, Poland 2. National Institute of Public Health - National Institute of Hygiene, Warsaw, Poland | Radosaw Charkiewicz, Jacek Nikliski, Przemyslaw Biecek. Joanna Resze, Piotr Majewski, Anetta Sulewska, Piotr Karabowicz, Joanna Kiluk, Janusz Dzioico, Konrad Raczkowski, Katarzyna Zacharczuk, Magdalena Nowakowska, Magorzata Sadkowska-Todys, Tomasz Wokowicz                                                                                                                                                                                                         |
| EPI_ISL_1659554                                                                                                                                                                                                                                                                | Diagnostyka Sp. z o.o.                                                                                              | 1. Academic Center for Pathomorphological and Genetic-Molecular Diagnostics ltd, Bialystok, Poland 2.                                                                                     | Radosaw Charkiewicz, Jacek Nikliski, Przemyslaw Biecek. Joanna Resze, Piotr Majewski, Anetta Sulewska, Piotr Karabowicz, Joanna Kiluk, Janusz Dzioico, Konrad Raczkowski, Katarzyna Zacharczuk, Magdalena Nowakowska, Magorzata Sadkowska-Todys, Tomasz Wokowicz                                                                                                                                                                                                         |



|                                                                                                                                                                                                                                 |                                                                                                                                                                      |                                                                                                                                                                              |                                                                                                                                                                                           |                                                                                                                                                                                                                                                                                                                                                                                                                                                                                                                                                                                                                                                                                                                                                                                                                                                                                                                                                                                                                                                                                                                                                                                                                                                                                                                                                                                                                                                  |
|---------------------------------------------------------------------------------------------------------------------------------------------------------------------------------------------------------------------------------|----------------------------------------------------------------------------------------------------------------------------------------------------------------------|------------------------------------------------------------------------------------------------------------------------------------------------------------------------------|-------------------------------------------------------------------------------------------------------------------------------------------------------------------------------------------|--------------------------------------------------------------------------------------------------------------------------------------------------------------------------------------------------------------------------------------------------------------------------------------------------------------------------------------------------------------------------------------------------------------------------------------------------------------------------------------------------------------------------------------------------------------------------------------------------------------------------------------------------------------------------------------------------------------------------------------------------------------------------------------------------------------------------------------------------------------------------------------------------------------------------------------------------------------------------------------------------------------------------------------------------------------------------------------------------------------------------------------------------------------------------------------------------------------------------------------------------------------------------------------------------------------------------------------------------------------------------------------------------------------------------------------------------|
| EPI_ISL_1659558                                                                                                                                                                                                                 | Pracownia Biologii Molekularnej Laboratorium Centralne SPZOZ                                                                                                         | National Institute of Public Health - National Institute of Hygiene, Warsaw, Poland                                                                                          | 1. Academic Center for Pathomorphological and Genetic-Molecular Diagnostics Ltd, Bialystok, Poland 2. National Institute of Public Health - National Institute of Hygiene, Warsaw, Poland | Radosaw Charkiewicz, Jacek Nikliski, Przemyslaw Biecek. Joanna Resze, Piotr Majewski, Anetta Sulewska, Piotr Karabowicz, Joanna Kiluk, Janusz Dzioico, Konrad Raczkowski, Katarzyna Zacharczuk, Magdalena Nowakowska, Magorzata Sadkowska-Todys, Tomasz Wokowicz                                                                                                                                                                                                                                                                                                                                                                                                                                                                                                                                                                                                                                                                                                                                                                                                                                                                                                                                                                                                                                                                                                                                                                                 |
| EPI_ISL_1659569, EPI_ISL_1659591, EPI_ISL_1659593, EPI_ISL_1659600, EPI_ISL_1659617, EPI_ISL_1659620, EPI_ISL_1659641, EPI_ISL_1659644, EPI_ISL_1659657, EPI_ISL_1659662, EPI_ISL_1659664                                       | see above                                                                                                                                                            | National Institute of Public Health - National Institute of Hygiene                                                                                                          | 1. Academic Center for Pathomorphological and Genetic-Molecular Diagnostics Ltd, Bialystok, Poland 2. National Institute of Public Health - National Institute of Hygiene, Warsaw, Poland | Radosaw Charkiewicz, Jacek Nikliski, Przemyslaw Biecek. Joanna Resze, Piotr Majewski, Anetta Sulewska, Piotr Karabowicz, Joanna Kiluk, Janusz Dzioico, Konrad Raczkowski, Katarzyna Zacharczuk, Magdalena Nowakowska, Magorzata Sadkowska-Todys, Tomasz Wokowicz                                                                                                                                                                                                                                                                                                                                                                                                                                                                                                                                                                                                                                                                                                                                                                                                                                                                                                                                                                                                                                                                                                                                                                                 |
| EPI_ISL_1660338, EPI_ISL_1660339<br>EPI_ISL_1660358, EPI_ISL_1660375                                                                                                                                                            | Pro-Vitam Diagnostics and Research Laboratory<br>Laboratory of Clinical Microbiology, Virology and Bioemergencies, ASST Fatebenefratelli Sacco - Sacco Hospital      | Pro-Vitam Diagnostics and Research Laboratory<br>Laboratory of Clinical Microbiology, Virology and Bioemergencies, ASST Fatebenefratelli Sacco - Sacco Hospital              |                                                                                                                                                                                           | Szilard N. Fejer, Istvan Horvath, Monika Korodi, Kinga Rakosi, Zsuzsanna Jenei<br>Valeria Micheli, Alessandro Mancon, Alberto Rizzo, Fiorenza Bracchitta, Luca Rizzuto, Maria Rita Gismondo                                                                                                                                                                                                                                                                                                                                                                                                                                                                                                                                                                                                                                                                                                                                                                                                                                                                                                                                                                                                                                                                                                                                                                                                                                                      |
| EPI_ISL_1660387, EPI_ISL_1660390<br>EPI_ISL_1660424, EPI_ISL_1660464, EPI_ISL_1660465, EPI_ISL_1660471<br>EPI_ISL_1660476, EPI_ISL_1660477                                                                                      | Houston Health Dept.<br>Communicable Disease Laboratory, Public Health Directorate                                                                                   | Houston Health Dept.<br>Communicable Disease Laboratory, Public Health Directorate                                                                                           |                                                                                                                                                                                           | Ryker Penn, Pamela Brown, Adolpho Lara, Yanlai Lai<br>Alwasti,H., AlHujairi,Z., AlAbbas,Z., Marhoon,A., Almoamen,G.                                                                                                                                                                                                                                                                                                                                                                                                                                                                                                                                                                                                                                                                                                                                                                                                                                                                                                                                                                                                                                                                                                                                                                                                                                                                                                                              |
| EPI_ISL_1660556, EPI_ISL_1660562, EPI_ISL_1660571, EPI_ISL_1660601<br>EPI_ISL_1660762                                                                                                                                           | New South Wales Health Pathology Royal Prince Alfred Hospital<br>Texas Department of State Health Services (TXDSSH)                                                  | Microbiology RPAH<br>Texas Department of State Health Services (TXDSSH)                                                                                                      |                                                                                                                                                                                           | Foster, C.; Au, J.; Ruiz Silva, M.; Deveson, I.; Bull, R.; Van Hal, S.; Rawlinson, W.<br>Rashmi Tuladhar, Bonnie Oh, Jenny Zhang, Maliha Rahman, Mayela Pedrueza, Anita Pokharel, Lorraine Rodriguez, Myong Koag, Chun Wang, Rachel Lee, Grace Kubin                                                                                                                                                                                                                                                                                                                                                                                                                                                                                                                                                                                                                                                                                                                                                                                                                                                                                                                                                                                                                                                                                                                                                                                             |
| EPI_ISL_1660847, EPI_ISL_1660967, EPI_ISL_1661001, EPI_ISL_1661010, EPI_ISL_1661024, EPI_ISL_1661028, EPI_ISL_1661033, EPI_ISL_1661038, EPI_ISL_1661054, EPI_ISL_1661062<br>EPI_ISL_1661090                                     | University of Liège COVID-19 testing center<br>Public Health Ontario Laboratory                                                                                      | GIGA Medical Genomics<br>Public Health Ontario Laboratory                                                                                                                    |                                                                                                                                                                                           | Keith Durkin, Maria Artesi, Sébastien Bontems, Raphaël Boreux, Bouchra Boujmla, Nathalie Renotte, Cécile Meex, Pierrette Melin, Marie-Pierre Hayette, Vincent Bours<br>Vanessa G Allen, Philip Banh, Yao Chen, Richard de Borja, Alireza Eshaghi, Nahuel Fittipaldi, Christine Frantz, Jonathan B Gubbay, Jennifer L Guthrie, Lawrence Heisler, Esha Joshi, Michael Laszloffy, Aimin Li, Michael CY Li, Dean Maxwell, Sandeep Nagra, Samir N Patel, Jared Simpson, Karthikeyan Sivaraman, Ashleigh Sullivan, Yogi Sundaravadanam, Sarah Teatero, Andre Villegas, Matthew Watson, Sandra Zittermann                                                                                                                                                                                                                                                                                                                                                                                                                                                                                                                                                                                                                                                                                                                                                                                                                                               |
| EPI_ISL_1661122, EPI_ISL_1661151<br>EPI_ISL_1661226<br>EPI_ISL_1661703                                                                                                                                                          | Platform BIS UZA/UAntwerpen<br>Brussels Academic Hospital Lab (LHUB-ULB)<br>Platform BIS UZA/UAntwerpen<br>Anteja laboratorija (UAB Diagnostikos laboratorija)       | Labo Klinische Biologie, UZA<br>Labo Klinische Biologie, UZA<br>Labo Klinische Biologie, UZA<br>Vilnius University Hospital Santaros Klinikos, Center of Laboratory Medicine |                                                                                                                                                                                           | Jasmine Coppens, Marie Le Mercier, Basil Britto Xavier, Christine Lammens, Veerle Matheussen, Herman Goossens<br>Jasmine Coppens, Marie Le Mercier, Basil Britto Xavier, Christine Lammens, Veerle Matheussen, Herman Goossens<br>Jasmine Coppens, Marie Le Mercier, Basil Britto Xavier, Christine Lammens, Veerle Matheussen, Herman Goossens<br>Gytis Dudas, Daniel Naumovas, Dovile Ezerskyte, Ingrida Olenraite, Rimvydas Norvilas, Ligita Raugaite, Monika Katenaite, Mindaugas Stoksus, Laimonas Griskevicius                                                                                                                                                                                                                                                                                                                                                                                                                                                                                                                                                                                                                                                                                                                                                                                                                                                                                                                             |
| EPI_ISL_1661870, EPI_ISL_1661878<br>EPI_ISL_1661913                                                                                                                                                                             | Texas Department of State Health Services (TXDSSH)<br>Laboratori Clinic Territorial de Girona                                                                        | Texas Department of State Health Services (TXDSSH)<br>Can Ruti SARS-CoV-2 Sequencing Hub (HUGTIP/IrsiCaixa/IGTP)                                                             |                                                                                                                                                                                           | Rashmi Tuladhar, Bonnie Oh, Jenny Zhang, Maliha Rahman, Mayela Pedrueza, Anita Pokharel, Lorraine Rodriguez, Myong Koag, Chun Wang, Rachel Lee, Grace Kubin<br>Marc Noguera-Julian, Pilar Armengol, Ignacio Blanco, Antoni E Bordoy, Francesc Catala-Moll, Pere-Joan Cardona, Maria Casadellà, Cristina Casañ, Gemma Clara, Bonaventura Clotet, Cristina Esteban, Montserrat Giménez, Mercedes Guerrero, Anna Not, Roger Paredes, Mariona Parera, Verónica Saludes, Alba Sánchez, and Elisa Martró on behalf of the Can Ruti SARS-CoV-2 Sequencing Hub.                                                                                                                                                                                                                                                                                                                                                                                                                                                                                                                                                                                                                                                                                                                                                                                                                                                                                          |
| EPI_ISL_1661917, EPI_ISL_1661942<br>EPI_ISL_1661987                                                                                                                                                                             | Microbiology Department, Laboratori Clínic Metropolitana Nord. Hospital Universitari Germans Trias i Pujol.<br>Centro de Investigacion Biomedica del Noreste (CIBIN) | Can Ruti SARS-CoV-2 Sequencing Hub (HUGTIP/IrsiCaixa/IGTP)<br>Unidad de Genomica Avanzada                                                                                    |                                                                                                                                                                                           | Marc Noguera-Julian, Pilar Armengol, Ignacio Blanco, Antoni E Bordoy, Francesc Catala-Moll, Pere-Joan Cardona, Maria Casadellà, Cristina Casañ, Gemma Clara, Bonaventura Clotet, Cristina Esteban, Montserrat Giménez, Mercedes Guerrero, Anna Not, Roger Paredes, Mariona Parera, Verónica Saludes, Alba Sánchez, and Elisa Martró on behalf of the Can Ruti SARS-CoV-2 Sequencing Hub.<br>Consortio Mexicano de Vigilancia Genomica (CoViGen-Mex). Authors (in alphabetical order): Julio Elias Alvarado-Yaah, Carlos F. Arias, Santiago Ávila-Rios, Victor Hugo Borja-Aburto, Celia Boukadida, Juan Bautista Chale-Dzul, Celida Duque Molina, Jose Antonio Enciso-Moreno, Gloria Elena Espinosa-Ayala, Fernando Fontove-Herrera, Victor Eduardo Garcia-Arias, Concepcion Grajales-Muniz, Ricardo Grande, Alfredo Herrera-Estrella, Carla Ivon Herrera-Najera, Pavel Isa, Brenda Irasema Maldonado-Meza, Bernardo Martinez-Miguel, Margarita Matias-Florentino, Maria Guadalupe de Jesus Mireles-Rivera, Gloria Maria Molina-Salinas, Hector Montoya-Fuentes, Jose Esteban Munoz-Medina, Jose de Jesus Nunez-Contreras, Alicia Ocana-Mondragon, Luis Alberto Ochoa-Carrera, Hector Esteban Paz-Juarez, Francisco Pulido, Helen Haydee Fernanda Ramirez-Plascencia, Angel Gustavo Salas-Lais, Alejandro Sanchez-Flores, Clara Esperanza Santacruz-Tinoco, Maria Guadalupe Santiago-Mauricio, Nelly Selem-Mojica, Blanca Taboada, Gloria Vazquez |
| EPI_ISL_1662230<br>EPI_ISL_1662236                                                                                                                                                                                              | Unidad de Investigacion Biomedica de Zacatecas (UIBZ)<br>AR Dept. of Health-PHL, Molecular Diagnostics                                                               | Unidad de Genomica Avanzada<br>Pathogen Discovery, Respiratory Viruses Branch, Division of Viral Diseases, Centers for Disease Control and Prevention                        |                                                                                                                                                                                           | Consortio Mexicano de Vigilancia Genomica (CoViGen-Mex). Authors (in alphabetical order): Julio Elias Alvarado-Yaah, Carlos F. Arias, Santiago Ávila-Rios, Victor Hugo Borja-Aburto, Celia Boukadida, Juan Bautista Chale-Dzul, Celida Duque Molina, Jose Antonio Enciso-Moreno, Gloria Elena Espinosa-Ayala, Fernando Fontove-Herrera, Victor Eduardo Garcia-Arias, Concepcion Grajales-Muniz, Ricardo Grande, Alfredo Herrera-Estrella, Carla Ivon Herrera-Najera, Pavel Isa, Brenda Irasema Maldonado-Meza, Bernardo Martinez-Miguel, Margarita Matias-Florentino, Maria Guadalupe de Jesus Mireles-Rivera, Gloria Maria Molina-Salinas, Hector Montoya-Fuentes, Jose Esteban Munoz-Medina, Jose de Jesus Nunez-Contreras, Alicia Ocana-Mondragon, Luis Alberto Ochoa-Carrera, Hector Esteban Paz-Juarez, Francisco Pulido, Helen Haydee Fernanda Ramirez-Plascencia, Angel Gustavo Salas-Lais, Alejandro Sanchez-Flores, Clara Esperanza Santacruz-Tinoco, Maria Guadalupe Santiago-Mauricio, Nelly Selem-Mojica, Blanca Taboada, Gloria Vazquez<br>Ying Tao, Yan Li, Anna Kelleher, Jing Zhang, Anna Montmayeur, Brian Lynch, Krista Queen, Anna Uehara, Peter Cook, Han Jia Justin Ng, Rachel Marine, Clinton R. Paden, Haibin Wang, Mark Burroughs, Justin Lee, Adam Retchless, Suxiang Tong                                                                                                                                              |
| EPI_ISL_1662370                                                                                                                                                                                                                 | Govt. Medical College, Ambikapur, Surguja                                                                                                                            | Institute of Life Sciences - INSACOG                                                                                                                                         |                                                                                                                                                                                           | Sunil K. Raghav, Safal Walia, Arup Ghosh, Atimukta Jha, Amol M. Kanampalliwar, Shifu Aggarwal, Rupesh Dash, Rajeeb Swain, Punit Prasad, INSACOG Consortium, Ajay Parida<br>Rebecca Savage                                                                                                                                                                                                                                                                                                                                                                                                                                                                                                                                                                                                                                                                                                                                                                                                                                                                                                                                                                                                                                                                                                                                                                                                                                                        |
| EPI_ISL_1662629, EPI_ISL_1662642, EPI_ISL_1662644, EPI_ISL_1662682<br>EPI_ISL_1662735                                                                                                                                           | Delaware Public Health Lab<br>Marshfield Labs                                                                                                                        | Delaware Public Health Lab<br>Pathogen Discovery, Respiratory Viruses Branch, Division of Viral Diseases, Centers for Disease Control and Prevention                         |                                                                                                                                                                                           | Ying Tao, Yan Li, Anna Kelleher, Jing Zhang, Anna Montmayeur, Brian Lynch, Krista Queen, Anna Uehara, Peter Cook, Han Jia Justin Ng, Rachel Marine, Clinton R. Paden, Haibin Wang, Mark Burroughs, Justin Lee, Adam Retchless, Suxiang Tong<br>C. Paul Morris, Chun Huai Luo, Adannaya Amadi, Matthew Schwartz, Heba H. Mostafa                                                                                                                                                                                                                                                                                                                                                                                                                                                                                                                                                                                                                                                                                                                                                                                                                                                                                                                                                                                                                                                                                                                  |
| EPI_ISL_1662773, EPI_ISL_1662917, EPI_ISL_1662935, EPI_ISL_1662938, EPI_ISL_1662940, EPI_ISL_1662960, EPI_ISL_1662981<br>EPI_ISL_1663072, EPI_ISL_1663120<br>EPI_ISL_1663263, EPI_ISL_1663265, EPI_ISL_1663306, EPI_ISL_1663322 | Johns Hopkins Hospital Department of Pathology<br>Illinois Department of Public Health<br>CIIMS, Bilaspur, Chhattisgarh                                              | Johns Hopkins Hospital Department of Pathology<br>Illinois Department of Public Health - Chicago Lab<br>Institute of Life Sciences - INSACOG                                 |                                                                                                                                                                                           | Sunil K. Raghav, Safal Walia, Arup Ghosh, Atimukta Jha, Amol M. Kanampalliwar, Shifu Aggarwal, Rupesh Dash, Rajeeb Swain, Punit Prasad, INSACOG Consortium, Ajay Parida                                                                                                                                                                                                                                                                                                                                                                                                                                                                                                                                                                                                                                                                                                                                                                                                                                                                                                                                                                                                                                                                                                                                                                                                                                                                          |

|                                                                                                                                                                                                                                                                                                                                                                                                                                                                                                                                                                                                                                                                                                                         |                                                                                                 |                                                                                                                                                                                                  |                                                                                                                                                                                                                                                                                                                                                                                                                                                                                            |
|-------------------------------------------------------------------------------------------------------------------------------------------------------------------------------------------------------------------------------------------------------------------------------------------------------------------------------------------------------------------------------------------------------------------------------------------------------------------------------------------------------------------------------------------------------------------------------------------------------------------------------------------------------------------------------------------------------------------------|-------------------------------------------------------------------------------------------------|--------------------------------------------------------------------------------------------------------------------------------------------------------------------------------------------------|--------------------------------------------------------------------------------------------------------------------------------------------------------------------------------------------------------------------------------------------------------------------------------------------------------------------------------------------------------------------------------------------------------------------------------------------------------------------------------------------|
| EPI_ISL_1663338, EPI_ISL_1663348, EPI_ISL_1663352                                                                                                                                                                                                                                                                                                                                                                                                                                                                                                                                                                                                                                                                       | RIMS, Ranchi                                                                                    | Institute of Life Sciences - INSACOG                                                                                                                                                             | Sunil K. Raghav, Safal Walia, Arup Ghosh, Atimukta Jha, Amol M. Kanampalliwar, Shifu Aggarwal, Rupesh Dash, Rajeeb Swain, Punit Prasad, INSACOG Consortium, Ajay Parida                                                                                                                                                                                                                                                                                                                    |
| EPI_ISL_1663490, EPI_ISL_1663493                                                                                                                                                                                                                                                                                                                                                                                                                                                                                                                                                                                                                                                                                        | Capital hospital, Bhubaneswar                                                                   | Institute of Life Sciences - INSACOG                                                                                                                                                             | Sunil K. Raghav, Safal Walia, Arup Ghosh, Atimukta Jha, Amol M. Kanampalliwar, Shifu Aggarwal, Rupesh Dash, Rajeeb Swain, Punit Prasad, INSACOG Consortium, Ajay Parida                                                                                                                                                                                                                                                                                                                    |
| EPI_ISL_1663500, EPI_ISL_1663503                                                                                                                                                                                                                                                                                                                                                                                                                                                                                                                                                                                                                                                                                        | Veer Surendra Sai Institute of Medical Sciences and Research, Burla, Sambalpur                  | Institute of Life Sciences - INSACOG                                                                                                                                                             | Sunil K. Raghav, Safal Walia, Arup Ghosh, Atimukta Jha, Amol M. Kanampalliwar, Shifu Aggarwal, Rupesh Dash, Rajeeb Swain, Punit Prasad, INSACOG Consortium, Ajay Parida                                                                                                                                                                                                                                                                                                                    |
| EPI_ISL_1663504                                                                                                                                                                                                                                                                                                                                                                                                                                                                                                                                                                                                                                                                                                         | AIIMS, Patna                                                                                    | Institute of Life Sciences - INSACOG                                                                                                                                                             | Sunil K. Raghav, Safal Walia, Arup Ghosh, Atimukta Jha, Amol M. Kanampalliwar, Shifu Aggarwal, Rupesh Dash, Rajeeb Swain, Punit Prasad, INSACOG Consortium, Ajay Parida                                                                                                                                                                                                                                                                                                                    |
| EPI_ISL_1663524, EPI_ISL_1663526, EPI_ISL_1663527                                                                                                                                                                                                                                                                                                                                                                                                                                                                                                                                                                                                                                                                       | REGIONAL VRDL, ICMR-RMRC BBSR                                                                   | Institute of Life Sciences - INSACOG                                                                                                                                                             | Sunil K. Raghav, Safal Walia, Arup Ghosh, Atimukta Jha, Amol M. Kanampalliwar, Shifu Aggarwal, Rupesh Dash, Rajeeb Swain, Punit Prasad, INSACOG Consortium, Ajay Parida                                                                                                                                                                                                                                                                                                                    |
| EPI_ISL_1663818, EPI_ISL_1663824, EPI_ISL_1663830                                                                                                                                                                                                                                                                                                                                                                                                                                                                                                                                                                                                                                                                       | CURATIVE                                                                                        | New Mexico Department of Health Scientific Laboratory                                                                                                                                            | Ellie Johnson, Anastacia Griego-Fisher, D'eldra Malone, Jennifer Benoit                                                                                                                                                                                                                                                                                                                                                                                                                    |
| EPI_ISL_1663931                                                                                                                                                                                                                                                                                                                                                                                                                                                                                                                                                                                                                                                                                                         | Santa Clara County Public Health Laboratory                                                     | Chan-Zuckerberg Biohub                                                                                                                                                                           | CZB Cliahub Consortium                                                                                                                                                                                                                                                                                                                                                                                                                                                                     |
| EPI_ISL_1664185                                                                                                                                                                                                                                                                                                                                                                                                                                                                                                                                                                                                                                                                                                         | Laboratorio Central Noel Nutels                                                                 | Bioinformatics Laboratory / LNCC                                                                                                                                                                 | Luiz G P de Almeida, Alessandra P Lamarca, Ronaldo da Silva F Jr, Liliane Cavalcante, Alexandra L Gerber, Ana Paula de C Guimaraes, Douglas Terra Machado, Cassia Alves, Diana Mariani, Thais Felix Cruz, Mario Sergio Ribeiro, Silvia Carvalho, Flávio Dias da Silva, Marcio Henrique de Oliveira Garcia, Leandro Magalhães de Souza, Cristiane Gomes da Silva, Caio Luiz Pereira Ribeiro, Andréa Cony Cavalcanti, Claudia Maria Braga de Mello, Amílcar Tanuri, Ana Tereza R Vasconcelos |
| EPI_ISL_1664220                                                                                                                                                                                                                                                                                                                                                                                                                                                                                                                                                                                                                                                                                                         | Notre Dame COVID Response and Testing Laboratory                                                | Notre Dame Genomics & Bioinformatics Core Facility                                                                                                                                               | Michael Pfrender, Joseph Sarro, Melissa Stephens                                                                                                                                                                                                                                                                                                                                                                                                                                           |
| EPI_ISL_1664276                                                                                                                                                                                                                                                                                                                                                                                                                                                                                                                                                                                                                                                                                                         | Santa Clara Valley Medical Center                                                               | Santa Clara County public Health Laboratory                                                                                                                                                      | Santa Clara County Public Health Department                                                                                                                                                                                                                                                                                                                                                                                                                                                |
| EPI_ISL_1664408                                                                                                                                                                                                                                                                                                                                                                                                                                                                                                                                                                                                                                                                                                         | Clinical Molecular Microbiology Laboratory, UNC Hospitals                                       | Jeremy Wang                                                                                                                                                                                      | Jeremy Wang, Alexander Rubinsteyn, Colleen Rice, Jason Smedberg, Shawn Hawken, Melissa Miller, Corbin Jones, Robert Hagan                                                                                                                                                                                                                                                                                                                                                                  |
| EPI_ISL_1664996                                                                                                                                                                                                                                                                                                                                                                                                                                                                                                                                                                                                                                                                                                         | National Laboratory for Health, Environment and Food, OMM, Koper                                | NLZOH (National Laboratory for Health, Environment and Food) / CISLD (Clinical Institute of Special Laboratory Diagnostics), University Children's Hospital, University Medical Center Ljubljana | Sandra Janezic, Aleksander Mahnic, Maja Rupnik, Tjasa Žohar retrnik, Alenka Štorman, Nika Gobec, Aleksander Kocuvan, Kaja Tominc, Maša Jari, Gašper Strugar, Tina Cvetkovi, Mitja Rak / Jernej Kova, Barbara Jenko Bizjan, Tine Tesovnik, Robert Šket, Katarina Kozmos, Ana Grom, Maruša Debeljak, Marko Pokorn, Tadej Battelino                                                                                                                                                           |
| EPI_ISL_1665109                                                                                                                                                                                                                                                                                                                                                                                                                                                                                                                                                                                                                                                                                                         | National Laboratory for Health, Environment and Food, OMM, Celje                                | NLZOH (National Laboratory for Health, Environment and Food) / CISLD (Clinical Institute of Special Laboratory Diagnostics), University Children's Hospital, University Medical Center Ljubljana | Sandra Janezic, Aleksander Mahnic, Maja Rupnik, Tjasa Žohar retrnik, Alenka Štorman, Nika Gobec, Aleksander Kocuvan, Kaja Tominc, Maša Jari, Mateja Borinc, Daša Kavka / Jernej Kova, Barbara Jenko Bizjan, Tine Tesovnik, Robert Šket, Katarina Kozmos, Ana Grom, Maruša Debeljak, Marko Pokorn, Tadej Battelino                                                                                                                                                                          |
| EPI_ISL_1665188                                                                                                                                                                                                                                                                                                                                                                                                                                                                                                                                                                                                                                                                                                         | CONSEJERIA DE SANIDAD Y ASUNTOS SOCIALES                                                        | Instituto de Salud Carlos III                                                                                                                                                                    | Iglesias-Caballero, M. Sandoñis, V. Vázquez-Morón, S. Camarero, S. Pozo, F. Casas, I. Jiménez, P. Zaballos, A. Monzón, S. Varona, S. Cuesta, I.GUTIERREZ AVILA, GONZALO                                                                                                                                                                                                                                                                                                                    |
| EPI_ISL_1665230                                                                                                                                                                                                                                                                                                                                                                                                                                                                                                                                                                                                                                                                                                         | National Platform bis UMONS/Jolimont                                                            | National Platform bis UMONS/Jolimont                                                                                                                                                             | François Dufrasne, Guillaume Bayon-Vicente, Gautier Detry, Ruddy Wattiez                                                                                                                                                                                                                                                                                                                                                                                                                   |
| EPI_ISL_1665762, EPI_ISL_1665829, EPI_ISL_1665836                                                                                                                                                                                                                                                                                                                                                                                                                                                                                                                                                                                                                                                                       | Colorado Department of Public Health and Environment                                            | Colorado Department of Public Health and Environment                                                                                                                                             | Laura Bankers, Molly C. Hetherington-Rauth, Diana Ir, Shannon Ely, Shannon R. Matzinger, Sarah Elizabeth Totten, Emily A. Travanty                                                                                                                                                                                                                                                                                                                                                         |
| EPI_ISL_1665908, EPI_ISL_1665940, EPI_ISL_1666000, EPI_ISL_1666004, EPI_ISL_1666008, EPI_ISL_1666009, EPI_ISL_1666017, EPI_ISL_1666044, EPI_ISL_1666065, EPI_ISL_1666311, EPI_ISL_1666317, EPI_ISL_1666340, EPI_ISL_1666365, EPI_ISL_1666427, EPI_ISL_1666433, EPI_ISL_1666441, EPI_ISL_1666448, EPI_ISL_1666491                                                                                                                                                                                                                                                                                                                                                                                                        | see above                                                                                       | Fulgent Genetics                                                                                                                                                                                 | Centers for Disease Control and Prevention Division of Viral Diseases, Pathogen Discovery                                                                                                                                                                                                                                                                                                                                                                                                  |
| EPI_ISL_1666963                                                                                                                                                                                                                                                                                                                                                                                                                                                                                                                                                                                                                                                                                                         | NS-QEII Health Sciences Centre                                                                  | National Microbiology Laboratory (NML)                                                                                                                                                           | Anna Majer, Shari Tyson, Grace Seo, Philip Mabon, Elsie Grudeski, Rhiannon Huzarewich, Russell Mandes, Anneliese Landgraff, Jennifer Tanner, Natalie Knox, Morag Graham, Gary Van Domselaar, Todd Hatchette, Jason LeBlanc, Janice Pettipas, Dan Gaston, Nathalie Bastien, Yan Li, Timothy Booth, Darian Hole, Madison Chapel, Kirsten Biggar, CanCOGeN's metadata curation team, Public Health Agency of Canada CanCOGeN team                                                             |
| EPI_ISL_1666995, EPI_ISL_1667090, EPI_ISL_1667110, EPI_ISL_1667158, EPI_ISL_1667172, EPI_ISL_1667214, EPI_ISL_1667239, EPI_ISL_1667308, EPI_ISL_1667378                                                                                                                                                                                                                                                                                                                                                                                                                                                                                                                                                                 | see above                                                                                       | Fulgent Genetics                                                                                                                                                                                 | Centers for Disease Control and Prevention Division of Viral Diseases, Pathogen Discovery                                                                                                                                                                                                                                                                                                                                                                                                  |
| EPI_ISL_1667445, EPI_ISL_1667463                                                                                                                                                                                                                                                                                                                                                                                                                                                                                                                                                                                                                                                                                        | Aegis Sciences Corporation                                                                      | Centers for Disease Control and Prevention Division of Viral Diseases, Pathogen Discovery                                                                                                        | Dakota Howard, Dhvani Batra, Peter W. Cook, Kara Moser, Adrian Paskey, Jason Caravas, Benjamin Rambo-Martin, Shatavia Morrison, Christopher Gulvick, Scott Sammons, Yvette Unoarumhi, Darlene Wagner, Matthew Schmerer, Cyndi Clark, Patrick Campbell, Rob Case, Vikramsinha Ghorpade, Holly Houdeshell, Ola Kvalvaag, Dillon Nall, Ethan Sanders, Alec Vest, Shaun Westlund, Matthew Hardison, Clinton R. Paden, Duncan MacCannell                                                        |
| EPI_ISL_1667474, EPI_ISL_1667475                                                                                                                                                                                                                                                                                                                                                                                                                                                                                                                                                                                                                                                                                        | Department of Laboratory Medicine, National Taiwan University Hospital                          | Microbial Genomics Core Lab, National Taiwan University Centers of Genomic and Precision Medicine                                                                                                | Shiou-Hwei Yeh, You-Yu Lin, Ya-Yun Lai, Chiao-Ling Li, Shan-Chwen Chang, Pei-Jer Chen, Sui-Yuan Chang                                                                                                                                                                                                                                                                                                                                                                                      |
| EPI_ISL_1667505, EPI_ISL_1667512, EPI_ISL_1667515, EPI_ISL_1667534, EPI_ISL_1667543, EPI_ISL_1667548, EPI_ISL_1667561, EPI_ISL_1667589, EPI_ISL_1667600, EPI_ISL_1667679, EPI_ISL_1667686, EPI_ISL_1667699, EPI_ISL_1667701, EPI_ISL_1667704, EPI_ISL_1667709, EPI_ISL_1667711, EPI_ISL_1667725, EPI_ISL_1667739, EPI_ISL_1667743, EPI_ISL_1667746, EPI_ISL_1667777, EPI_ISL_1667818, EPI_ISL_1667876, EPI_ISL_1667882, EPI_ISL_1668038, EPI_ISL_1668108, EPI_ISL_1668135, EPI_ISL_1668138, EPI_ISL_1668174, EPI_ISL_1668240, EPI_ISL_1668304, EPI_ISL_1668391, EPI_ISL_1668409                                                                                                                                         | see above                                                                                       | Aegis Sciences Corporation                                                                                                                                                                       | Centers for Disease Control and Prevention Division of Viral Diseases, Pathogen Discovery                                                                                                                                                                                                                                                                                                                                                                                                  |
| EPI_ISL_1668456, EPI_ISL_1668464, EPI_ISL_1668471, EPI_ISL_1668523, EPI_ISL_1668554, EPI_ISL_1668583, EPI_ISL_1668592, EPI_ISL_1668603, EPI_ISL_1668621, EPI_ISL_1668632, EPI_ISL_1668643, EPI_ISL_1668645, EPI_ISL_1668684, EPI_ISL_1668707, EPI_ISL_1668730, EPI_ISL_1668746, EPI_ISL_1668768, EPI_ISL_1668769, EPI_ISL_1668771, EPI_ISL_1668778, EPI_ISL_1668788, EPI_ISL_1668788, EPI_ISL_1668797, EPI_ISL_1668808, EPI_ISL_1668871, EPI_ISL_1668889, EPI_ISL_1668907, EPI_ISL_1668930, EPI_ISL_1668977, EPI_ISL_1668994, EPI_ISL_1669008, EPI_ISL_1669019, EPI_ISL_1669025, EPI_ISL_1669048, EPI_ISL_1669082, EPI_ISL_1669089, EPI_ISL_1669132, EPI_ISL_1669148, EPI_ISL_1669157, EPI_ISL_1669303, EPI_ISL_1669313 | see above                                                                                       | Quest Diagnostics Incorporated                                                                                                                                                                   | Centers for Disease Control and Prevention Division of Viral Diseases, Pathogen Discovery                                                                                                                                                                                                                                                                                                                                                                                                  |
| EPI_ISL_1669362                                                                                                                                                                                                                                                                                                                                                                                                                                                                                                                                                                                                                                                                                                         | Hospital Universitari Vall d'Hebron - Vall d'Hebron Institut de Recerca                         | Hospital Universitari Vall d'Hebron - Vall d'Hebron Institut de Recerca                                                                                                                          | Cristina Andrés, María Piñana, Damir Garcia-Cehic, Ariadna Rando, Julianna Esperalba, María Gema Codina, Carla Castillo, María Carmen Martín, Tomàs Pumarola, Josep Quer, Andrés Antón                                                                                                                                                                                                                                                                                                     |
| EPI_ISL_1669369                                                                                                                                                                                                                                                                                                                                                                                                                                                                                                                                                                                                                                                                                                         | Hospital Universitari Vall d'Hebron - Vall Hebron Institut de Recerca                           | Hospital Universitari Vall d'Hebron - Vall d'Hebron Institut de Recerca                                                                                                                          | Cristina Andrés, María Piñana, Damir Garcia-Cehic, Ariadna Rando, Julianna Esperalba, María Gema Codina, Carla Castillo, María Carmen Martín, Tomàs Pumarola, Josep Quer, Andrés Antón                                                                                                                                                                                                                                                                                                     |
| EPI_ISL_1669738, EPI_ISL_1669748, EPI_ISL_1669751                                                                                                                                                                                                                                                                                                                                                                                                                                                                                                                                                                                                                                                                       | Department of Virology, Istituto Zooprofilattico Sperimentale del Lazio e della Toscana (IZSLT) | Department of General Diagnostics; Department of Virology; Istituto Zooprofilattico Sperimentale del Lazio e della Toscana (IZSLT)                                                               | Patricia Alba, Giuseppe Manna, Elena L. Diaconu, Fabiola Feltrin, Raffaella Conti, Teresa Scicluna, Virginia Carfora, Antonella Cersini, Alessia Franco, Antonio Battisti.                                                                                                                                                                                                                                                                                                                 |
| EPI_ISL_1669865                                                                                                                                                                                                                                                                                                                                                                                                                                                                                                                                                                                                                                                                                                         | Platform BIS UZA/UAntwerpen                                                                     | UAntwerp, Laboratory of Medical Microbiology                                                                                                                                                     | Basil Britto Xavier, Jasmine Coppens, Marie Le Mercier, Christine Lammens, Veerle Matheussen, Herman Goossens                                                                                                                                                                                                                                                                                                                                                                              |
| EPI_ISL_1669951                                                                                                                                                                                                                                                                                                                                                                                                                                                                                                                                                                                                                                                                                                         | Azienda Ospedaliera Terni                                                                       | Istituto Zooprofilattico Sperimentale dell'Abruzzo e Molise "G. Caporale"                                                                                                                        | Palumbo M, Scaccetti A, Lorusso A, Marcacci M, Di Domenico M, Ancora M, Curini V, Mangone I, Rinaldi A, Scialabba S, Di Pasquale A, Cammà C, Puglia I, Calistri P, Savini G                                                                                                                                                                                                                                                                                                                |

|                                                                                                                                                                                                                                                                                                      |                                                                                                                                                                                                                                                                                                                                                                                                       |                                                                                                                                                                                                                                                                                                                                                                                                                                                                                                                                                                                                                                                                                        |                                                                                                                                                                                                                                                                                                                                                                                                                                                                                                                                                                                                                                                                                                                                                                                                                                                                                                                                                                                                                                                                                                                                                                                                                                                                                                                                                                                                                                                                                                                                                                                                                                                                                                                                                                                                                                                                                                                                                                                                                                                                                                                                                                                                                                                                                                                                                                                                                                                                                                                                                                                                                                                                 |
|------------------------------------------------------------------------------------------------------------------------------------------------------------------------------------------------------------------------------------------------------------------------------------------------------|-------------------------------------------------------------------------------------------------------------------------------------------------------------------------------------------------------------------------------------------------------------------------------------------------------------------------------------------------------------------------------------------------------|----------------------------------------------------------------------------------------------------------------------------------------------------------------------------------------------------------------------------------------------------------------------------------------------------------------------------------------------------------------------------------------------------------------------------------------------------------------------------------------------------------------------------------------------------------------------------------------------------------------------------------------------------------------------------------------|-----------------------------------------------------------------------------------------------------------------------------------------------------------------------------------------------------------------------------------------------------------------------------------------------------------------------------------------------------------------------------------------------------------------------------------------------------------------------------------------------------------------------------------------------------------------------------------------------------------------------------------------------------------------------------------------------------------------------------------------------------------------------------------------------------------------------------------------------------------------------------------------------------------------------------------------------------------------------------------------------------------------------------------------------------------------------------------------------------------------------------------------------------------------------------------------------------------------------------------------------------------------------------------------------------------------------------------------------------------------------------------------------------------------------------------------------------------------------------------------------------------------------------------------------------------------------------------------------------------------------------------------------------------------------------------------------------------------------------------------------------------------------------------------------------------------------------------------------------------------------------------------------------------------------------------------------------------------------------------------------------------------------------------------------------------------------------------------------------------------------------------------------------------------------------------------------------------------------------------------------------------------------------------------------------------------------------------------------------------------------------------------------------------------------------------------------------------------------------------------------------------------------------------------------------------------------------------------------------------------------------------------------------------------|
| EPI_ISL_1669962, EPI_ISL_1669965, EPI_ISL_1669966, EPI_ISL_1669971<br>EPI_ISL_1669979                                                                                                                                                                                                                | Laboratory of virology and molecular diagnostics, Institute of Public Health<br>General Hospital - Prilep                                                                                                                                                                                                                                                                                             | Laboratory of virology and molecular diagnostics, Institute of Public Health<br>Laboratory of virology and molecular diagnostics, Institute of Public Health                                                                                                                                                                                                                                                                                                                                                                                                                                                                                                                           | Kuzmanovska M, Boshevska G, Janchevska E.<br>Kuzmanovska M, Boshevska G, Janchevska E.                                                                                                                                                                                                                                                                                                                                                                                                                                                                                                                                                                                                                                                                                                                                                                                                                                                                                                                                                                                                                                                                                                                                                                                                                                                                                                                                                                                                                                                                                                                                                                                                                                                                                                                                                                                                                                                                                                                                                                                                                                                                                                                                                                                                                                                                                                                                                                                                                                                                                                                                                                          |
| EPI_ISL_1669988, EPI_ISL_1669991<br>EPI_ISL_1670624<br>EPI_ISL_1670744                                                                                                                                                                                                                               | Laboratory of virology and molecular diagnostics, Institute of Public Health<br>Plateforme de testing Namuroise<br>UW Virology Lab                                                                                                                                                                                                                                                                    | Laboratory of virology and molecular diagnostics, Institute of Public Health<br>Plateforme de testing Namuroise<br>UW Virology Lab                                                                                                                                                                                                                                                                                                                                                                                                                                                                                                                                                     | Kuzmanovska M, Boshevska G, Janchevska E.<br>Céline Maschietto; Otto Gaetan ; Denis Olivier ; Degosserie Jonathan ; Mullier François<br>Pavitra Roychoudhury, Hong Xie, Lasata Shrestha, Shah Mohamed Bakhsh, Michelle Lin, Noah R. Baker, Sean Ellis, Meei-Li Huang, Keith R Jerome, Alexander Greninger                                                                                                                                                                                                                                                                                                                                                                                                                                                                                                                                                                                                                                                                                                                                                                                                                                                                                                                                                                                                                                                                                                                                                                                                                                                                                                                                                                                                                                                                                                                                                                                                                                                                                                                                                                                                                                                                                                                                                                                                                                                                                                                                                                                                                                                                                                                                                       |
| EPI_ISL_1670970, EPI_ISL_1671017<br>EPI_ISL_1671034                                                                                                                                                                                                                                                  | Austrian Agency for Health and Food Safety (AGES)<br>Institute for Water Quality and Resource Management, Technical University Vienna                                                                                                                                                                                                                                                                 | Bergthaler laboratory, CeMM Research Center for Molecular Medicine of the Austrian Academy of Sciences<br>Bergthaler laboratory, CeMM Research Center for Molecular Medicine of the Austrian Academy of Sciences                                                                                                                                                                                                                                                                                                                                                                                                                                                                       | Lukas Endler, Anna Schedl, Fabian Amman, Petr Triska, Thomas Penz, Benedikt Agerer, Maelle Le Moing, Michael Schuster, Bekir Erguner, Jan Laine, Martin Senekowitsch, Christoph Bock, Andreas Bergthaler<br>Lukas Endler, Anna Schedl, Fabian Amman, Petr Triska, Thomas Penz, Benedikt Agerer, Maelle Le Moing, Michael Schuster, Bekir Erguner, Jan Laine, Martin Senekowitsch, Christoph Bock, Andreas Bergthaler                                                                                                                                                                                                                                                                                                                                                                                                                                                                                                                                                                                                                                                                                                                                                                                                                                                                                                                                                                                                                                                                                                                                                                                                                                                                                                                                                                                                                                                                                                                                                                                                                                                                                                                                                                                                                                                                                                                                                                                                                                                                                                                                                                                                                                            |
| EPI_ISL_1671036, EPI_ISL_1671060<br>EPI_ISL_1671111, EPI_ISL_1671112<br>EPI_ISL_1671141, EPI_ISL_1671142<br>EPI_ISL_1671225                                                                                                                                                                          | Austrian Agency for Health and Food Safety (AGES)<br>Institute for Water Quality and Resource Management, Technical University Vienna<br>NYC Pandemic Response Lab<br>Servicio de Microbiología. Hospital Ramón y Cajal. (CIBERESP)                                                                                                                                                                   | Bergthaler laboratory, CeMM Research Center for Molecular Medicine of the Austrian Academy of Sciences<br>Bergthaler laboratory, CeMM Research Center for Molecular Medicine of the Austrian Academy of Sciences<br>Wadsworth Center, New York State Department of Health<br>SeqCOVID-SPAIN consortium/IBV(CSIC)                                                                                                                                                                                                                                                                                                                                                                       | Lukas Endler, Anna Schedl, Fabian Amman, Petr Triska, Thomas Penz, Benedikt Agerer, Maelle Le Moing, Michael Schuster, Bekir Erguner, Jan Laine, Martin Senekowitsch, Christoph Bock, Andreas Bergthaler<br>Lukas Endler, Anna Schedl, Fabian Amman, Petr Triska, Thomas Penz, Benedikt Agerer, Maelle Le Moing, Michael Schuster, Bekir Erguner, Jan Laine, Martin Senekowitsch, Christoph Bock, Andreas Bergthaler<br>Kirsten St. George, Daryl M. Lamson, Alexis Russell, Matthew Shudt, Melissa A Leisner, Jonathan Plitnick, Catharine Prussing, Navjot Singh, John Kelly, Erasmus Schneider, Erica Lasek-Nesselquist<br>Jose Mª González-Alba, L. Olavarrieta, Val Fernández, Juan C Galán and SeqCOVID-SPAIN consortium                                                                                                                                                                                                                                                                                                                                                                                                                                                                                                                                                                                                                                                                                                                                                                                                                                                                                                                                                                                                                                                                                                                                                                                                                                                                                                                                                                                                                                                                                                                                                                                                                                                                                                                                                                                                                                                                                                                                  |
| EPI_ISL_1671318, EPI_ISL_1671319, EPI_ISL_1671320, EPI_ISL_1671321<br>EPI_ISL_1671322<br>EPI_ISL_1671323, EPI_ISL_1671327<br>EPI_ISL_1671328<br>EPI_ISL_1671364                                                                                                                                      | ALBANY MEDICAL CENTER<br>STONY BROOK UNIVERSITY HOSPITAL<br>ALBANY MEDICAL CENTER<br>STONY BROOK UNIVERSITY HOSPITAL<br>Departamento de Microbiología, CDB, Hospital Clínic, Barcelona                                                                                                                                                                                                                | Wadsworth Center, New York State Department of Health<br>Wadsworth Center, New York State Department of Health<br>Wadsworth Center, New York State Department of Health<br>Wadsworth Center, New York State Department of Health<br>SeqCOVID-SPAIN consortium/IBV(CSIC)                                                                                                                                                                                                                                                                                                                                                                                                                | Kirsten St. George, Daryl M. Lamson, Alexis Russell, Matthew Shudt, Melissa A Leisner, Jonathan Plitnick, Catharine Prussing, Navjot Singh, John Kelly, Erasmus Schneider, Erica Lasek-Nesselquist<br>Kirsten St. George, Daryl M. Lamson, Alexis Russell, Matthew Shudt, Melissa A Leisner, Jonathan Plitnick, Catharine Prussing, Navjot Singh, John Kelly, Erasmus Schneider, Erica Lasek-Nesselquist<br>Kirsten St. George, Daryl M. Lamson, Alexis Russell, Matthew Shudt, Melissa A Leisner, Jonathan Plitnick, Catharine Prussing, Navjot Singh, John Kelly, Erasmus Schneider, Erica Lasek-Nesselquist<br>Kirsten St. George, Daryl M. Lamson, Alexis Russell, Matthew Shudt, Melissa A Leisner, Jonathan Plitnick, Catharine Prussing, Navjot Singh, John Kelly, Erasmus Schneider, Erica Lasek-Nesselquist<br>Andrea Vergara, Mikel Martínez, Elisa Rubio, Jéssica Navero, Aida Peiró and SeqCOVID-SPAIN consortium                                                                                                                                                                                                                                                                                                                                                                                                                                                                                                                                                                                                                                                                                                                                                                                                                                                                                                                                                                                                                                                                                                                                                                                                                                                                                                                                                                                                                                                                                                                                                                                                                                                                                                                                   |
| EPI_ISL_1671369, EPI_ISL_1671370<br>EPI_ISL_1671451<br>EPI_ISL_1671455<br>EPI_ISL_1671460<br>EPI_ISL_1671465<br>EPI_ISL_1671467, EPI_ISL_1671470, EPI_ISL_1671471, EPI_ISL_1671472<br>EPI_ISL_1671609<br>EPI_ISL_1671612<br>EPI_ISL_1671616<br>EPI_ISL_1671618<br>EPI_ISL_1671620<br>EPI_ISL_1671623 | IdISSC/Hospital Clínico San Carlos de Madrid<br>ALBANY MEDICAL CENTER<br>BOSTON HEART DIAGNOSTICS CORP<br>WESTCHESTER MEDICAL CENTER<br>SUNY UPSTATE MEDICAL UNIVERSITY<br>WESTCHESTER MEDICAL CENTER<br>NORTHWELL HEALTH LABORATORIES<br>SUNY UPSTATE MEDICAL UNIVERSITY<br>NORTHWELL HEALTH LABORATORIES<br>BOSTON HEART DIAGNOSTICS CORP<br>NORTHWELL HEALTH LABORATORIES<br>ALBANY MEDICAL CENTER | SeqCOVID-SPAIN consortium/IBV(CSIC)<br>Wadsworth Center, New York State Department of Health<br>Wadsworth Center, New York State Department of Health | Alberto Delgado-Iribarren, Esther Culebras López, Vicente Estrada Pérez, Jorge Matías-Guiu, Luis Ortega Medina, Silvia Sánchez Ramón, Ulises Gómez-Pinedo and SeqCOVID-SPAIN consortium<br>Kirsten St. George, Daryl M. Lamson, Alexis Russell, Matthew Shudt, Melissa A Leisner, Jonathan Plitnick, Catharine Prussing, Navjot Singh, John Kelly, Erasmus Schneider, Erica Lasek-Nesselquist<br>Kirsten St. George, Daryl M. Lamson, Alexis Russell, Matthew Shudt, Melissa A Leisner, Jonathan Plitnick, Catharine Prussing, Navjot Singh, John Kelly, Erasmus Schneider, Erica Lasek-Nesselquist<br>Kirsten St. George, Daryl M. Lamson, Alexis Russell, Matthew Shudt, Melissa A Leisner, Jonathan Plitnick, Catharine Prussing, Navjot Singh, John Kelly, Erasmus Schneider, Erica Lasek-Nesselquist<br>Kirsten St. George, Daryl M. Lamson, Alexis Russell, Matthew Shudt, Melissa A Leisner, Jonathan Plitnick, Catharine Prussing, Navjot Singh, John Kelly, Erasmus Schneider, Erica Lasek-Nesselquist<br>Kirsten St. George, Daryl M. Lamson, Alexis Russell, Matthew Shudt, Melissa A Leisner, Jonathan Plitnick, Catharine Prussing, Navjot Singh, John Kelly, Erasmus Schneider, Erica Lasek-Nesselquist<br>Kirsten St. George, Daryl M. Lamson, Alexis Russell, Matthew Shudt, Melissa A Leisner, Jonathan Plitnick, Catharine Prussing, Navjot Singh, John Kelly, Erasmus Schneider, Erica Lasek-Nesselquist<br>Kirsten St. George, Daryl M. Lamson, Alexis Russell, Matthew Shudt, Melissa A Leisner, Jonathan Plitnick, Catharine Prussing, Navjot Singh, John Kelly, Erasmus Schneider, Erica Lasek-Nesselquist<br>Kirsten St. George, Daryl M. Lamson, Alexis Russell, Matthew Shudt, Melissa A Leisner, Jonathan Plitnick, Catharine Prussing, Navjot Singh, John Kelly, Erasmus Schneider, Erica Lasek-Nesselquist<br>Kirsten St. George, Daryl M. Lamson, Alexis Russell, Matthew Shudt, Melissa A Leisner, Jonathan Plitnick, Catharine Prussing, Navjot Singh, John Kelly, Erasmus Schneider, Erica Lasek-Nesselquist<br>Kirsten St. George, Daryl M. Lamson, Alexis Russell, Matthew Shudt, Melissa A Leisner, Jonathan Plitnick, Catharine Prussing, Navjot Singh, John Kelly, Erasmus Schneider, Erica Lasek-Nesselquist<br>Kirsten St. George, Daryl M. Lamson, Alexis Russell, Matthew Shudt, Melissa A Leisner, Jonathan Plitnick, Catharine Prussing, Navjot Singh, John Kelly, Erasmus Schneider, Erica Lasek-Nesselquist<br>Kirsten St. George, Daryl M. Lamson, Alexis Russell, Matthew Shudt, Melissa A Leisner, Jonathan Plitnick, Catharine Prussing, Navjot Singh, John Kelly, Erasmus Schneider, Erica Lasek-Nesselquist |
| EPI_ISL_1671624, EPI_ISL_1671625<br>EPI_ISL_1671627<br>EPI_ISL_1671628, EPI_ISL_1671629, EPI_ISL_1671630, EPI_ISL_1671632, EPI_ISL_1671638<br>EPI_ISL_1671770<br>EPI_ISL_1671774, EPI_ISL_1671775, EPI_ISL_1671792, EPI_ISL_1671804<br>EPI_ISL_1672328<br>EPI_ISL_1672391<br>EPI_ISL_1672404         | WESTCHESTER MEDICAL CENTER<br>URMC LABS<br>NORTHWELL HEALTH LABORATORIES<br>CH Calais<br>CHU Lille<br>MD PHL<br>CSIR-Centre for Cellular and Molecular Biology<br>Life Sciences Center, Vilnius University                                                                                                                                                                                            | Wadsworth Center, New York State Department of Health<br>Wadsworth Center, New York State Department of Health<br>Wadsworth Center, New York State Department of Health<br>CHU Lille - Laboratoire de Virologie<br>CHU Lille - Laboratoire de Virologie<br>MD PHL<br>CSIR-Centre for Cellular and Molecular Biology<br>Institute of Biotechnology, Life Sciences Center, Vilnius                                                                                                                                                                                                                                                                                                       | Kirsten St. George, Daryl M. Lamson, Alexis Russell, Matthew Shudt, Melissa A Leisner, Jonathan Plitnick, Catharine Prussing, Navjot Singh, John Kelly, Erasmus Schneider, Erica Lasek-Nesselquist<br>Kirsten St. George, Daryl M. Lamson, Alexis Russell, Matthew Shudt, Melissa A Leisner, Jonathan Plitnick, Catharine Prussing, Navjot Singh, John Kelly, Erasmus Schneider, Erica Lasek-Nesselquist<br>Kirsten St. George, Daryl M. Lamson, Alexis Russell, Matthew Shudt, Melissa A Leisner, Jonathan Plitnick, Catharine Prussing, Navjot Singh, John Kelly, Erasmus Schneider, Erica Lasek-Nesselquist<br>AIT YAHYA Emilie, ALIDJINOU Enagnon Kazali, BOCKET Laurence, CREPIN Michel, DEMAY Christophe, ENGELMANN Iika, GEFFROY Sandrine, GUIGON Aurélie, LAMBERT Valérie, LAZREK Mouna, NOBILLIAUX Florian, PREVOST Brigitte, THUILLIER Caroline, TINEZ Claire<br>AIT YAHYA Emilie, ALIDJINOU Enagnon Kazali, BOCKET Laurence, CREPIN Michel, DEMAY Christophe, ENGELMANN Iika, GEFFROY Sandrine, GUIGON Aurélie, LAMBERT Valérie, LAZREK Mouna, NOBILLIAUX Florian, PREVOST Brigitte, THUILLIER Caroline, TINEZ Claire<br>Maryland Department of Health Laboratories Administration<br>Dhiviya Vedagiri, Divya Gupta, Vishal Sah, Onkar Kulkarni, Lamuk Zaveri, Ara Sreenivas, Sofia Banu, Shreekanth Verma, Amareshwar Vodapalli , Viswagithe S L, B Himasri, Sharath Chandra Thota, Karthik Bharadwaj Tallapaka, Rakesh K Mishra, Divya Tej Sowpati, Krishnan Harinivas Harshan<br>Emilija Vasilunaitė, Milda Norkiene, Danguole Ziogiene, Albertas Timinskas, Alma Gedvilaitė                                                                                                                                                                                                                                                                                                                                                                                                                                                                                                                                                                                                                                                                                                                                                                                                                                                                                                                                                                                                                                                                      |

|                                                                                                                                                                                                                                                                                                                                                                                                                                                                                                                                                                                                                                                                                                                                                                                                                                                                                                                                                                                                                                                                                                                                                                                                                                                                                                                                                                                                                                                                                                                                                                                                                                                                                                                                  |                                                                                                                                                                                | University                                                                                                                                     |                                                                                                                                                                                                                                                                                                                                                                                                                 |  |
|----------------------------------------------------------------------------------------------------------------------------------------------------------------------------------------------------------------------------------------------------------------------------------------------------------------------------------------------------------------------------------------------------------------------------------------------------------------------------------------------------------------------------------------------------------------------------------------------------------------------------------------------------------------------------------------------------------------------------------------------------------------------------------------------------------------------------------------------------------------------------------------------------------------------------------------------------------------------------------------------------------------------------------------------------------------------------------------------------------------------------------------------------------------------------------------------------------------------------------------------------------------------------------------------------------------------------------------------------------------------------------------------------------------------------------------------------------------------------------------------------------------------------------------------------------------------------------------------------------------------------------------------------------------------------------------------------------------------------------|--------------------------------------------------------------------------------------------------------------------------------------------------------------------------------|------------------------------------------------------------------------------------------------------------------------------------------------|-----------------------------------------------------------------------------------------------------------------------------------------------------------------------------------------------------------------------------------------------------------------------------------------------------------------------------------------------------------------------------------------------------------------|--|
| EPI_ISL_1672440                                                                                                                                                                                                                                                                                                                                                                                                                                                                                                                                                                                                                                                                                                                                                                                                                                                                                                                                                                                                                                                                                                                                                                                                                                                                                                                                                                                                                                                                                                                                                                                                                                                                                                                  | CH.INTERCOMMUNAL DE CRETEIL                                                                                                                                                    | Department of Virology, Henri Mondor University Hospital, Assistance Publique Hôpitaux de Paris, Université Paris-Est Créteil, INSERM U955     | Christophe Rodriguez, Slim Fourati, Vanessa Demontant, Guillaume Gricourt, Melissa N'Debi, Alexandre Soulier, Elisabeth Trawinski, Jean-Michel Pawlotsky                                                                                                                                                                                                                                                        |  |
| EPI_ISL_1672627                                                                                                                                                                                                                                                                                                                                                                                                                                                                                                                                                                                                                                                                                                                                                                                                                                                                                                                                                                                                                                                                                                                                                                                                                                                                                                                                                                                                                                                                                                                                                                                                                                                                                                                  | Minnesota Department of Health, Public Health Laboratory                                                                                                                       | Minnesota Department of Health, Public Health Laboratory                                                                                       | Alexandra Lorentz, Jacob Garfin, Matt Plumb, and Xiong Wang                                                                                                                                                                                                                                                                                                                                                     |  |
| EPI_ISL_1672766                                                                                                                                                                                                                                                                                                                                                                                                                                                                                                                                                                                                                                                                                                                                                                                                                                                                                                                                                                                                                                                                                                                                                                                                                                                                                                                                                                                                                                                                                                                                                                                                                                                                                                                  | GH A.CHENEVIER-H.MONDOR                                                                                                                                                        | Department of Virology, Henri Mondor University Hospital, Assistance Publique Hôpitaux de Paris, Université Paris-Est Créteil, INSERM U955     | Christophe Rodriguez, Slim Fourati, Vanessa Demontant, Guillaume Gricourt, Melissa N'Debi, Alexandre Soulier, Elisabeth Trawinski, Jean-Michel Pawlotsky                                                                                                                                                                                                                                                        |  |
| EPI_ISL_1672809, EPI_ISL_1672810, EPI_ISL_1672811, EPI_ISL_1672816, EPI_ISL_1672828, EPI_ISL_1672833, EPI_ISL_1672835                                                                                                                                                                                                                                                                                                                                                                                                                                                                                                                                                                                                                                                                                                                                                                                                                                                                                                                                                                                                                                                                                                                                                                                                                                                                                                                                                                                                                                                                                                                                                                                                            | Laboratorio Aziendale di Microbiologia e Virologia, Azienda Sanitaria dell'Alto Adige                                                                                          | Laboratorio Aziendale di Microbiologia e Virologia, Azienda Sanitaria dell'Alto Adige                                                          | Irene Bianconi, Bartolomeo Mobilio Rodriguez, Elisabetta Giacobazzi, Elisa Masi, Stefanie Wieser, Anne Picard, Claudia Volpato, Chiara Cantaloni, Elisabetta Pagani                                                                                                                                                                                                                                             |  |
| EPI_ISL_1673407, EPI_ISL_1673449, EPI_ISL_1673452, EPI_ISL_1673502, EPI_ISL_1673522, EPI_ISL_1673577, EPI_ISL_1673579                                                                                                                                                                                                                                                                                                                                                                                                                                                                                                                                                                                                                                                                                                                                                                                                                                                                                                                                                                                                                                                                                                                                                                                                                                                                                                                                                                                                                                                                                                                                                                                                            | Istituto Zooprofilattico Sperimentale del Mezzogiorno                                                                                                                          | TIGEM                                                                                                                                          | Antonio Grimaldi Patrizia Annunziata Francesco Panariello Biancamaria Pierri Claudia Tiberio Teresa Giuliano Valentina Bouche Chiara Colantuono Maria Concetta Cuomo Denise Di Concilio Lucio Di Filippo Anna Manfredi Marcello Salvi Antonio Limone Luigi Atripaldi Pellegrino Cerino Andrea Ballabio Davide Cacchiarelli                                                                                      |  |
| EPI_ISL_1673852, EPI_ISL_1674422                                                                                                                                                                                                                                                                                                                                                                                                                                                                                                                                                                                                                                                                                                                                                                                                                                                                                                                                                                                                                                                                                                                                                                                                                                                                                                                                                                                                                                                                                                                                                                                                                                                                                                 | Israel Central Virology laboratory                                                                                                                                             | Israel National Consortium for SARS-CoV-2 sequencing                                                                                           | Neta Zuckerman, Efrat Dahan Bucris, Michal Mandelboim, Dana Bar-Ilan, Oran Erster, Tzvia Mann, Omer Murik, David A. Zeevi, Assaf Rokney, Joseph Jaffe, Eva Nachum, Maya Davidovich Cohen, Ephraim Fass, Gal Zizelski Valenci, Mor Rubinstein, Efrat Rorman, Israel Nissan, Efrat Glick-Saar, Omri Nayshool, Gideon Rechavi, Ella Mendelson, Orna Mor                                                            |  |
| EPI_ISL_1674535, EPI_ISL_1674537, EPI_ISL_1674540, EPI_ISL_1674541, EPI_ISL_1674542, EPI_ISL_1674543, EPI_ISL_1674544, EPI_ISL_1674545, EPI_ISL_1674548, EPI_ISL_1674549, EPI_ISL_1674561, EPI_ISL_1674562, EPI_ISL_1674563, EPI_ISL_1674564, EPI_ISL_1674565, EPI_ISL_1674566, EPI_ISL_1674569, EPI_ISL_1674570, EPI_ISL_1674571, EPI_ISL_1674572, EPI_ISL_1674573, EPI_ISL_1674575, EPI_ISL_1674576, EPI_ISL_1674577, EPI_ISL_1674579, EPI_ISL_1674580, EPI_ISL_1674581, EPI_ISL_1674582, EPI_ISL_1674584, EPI_ISL_1674586, EPI_ISL_1674589, EPI_ISL_1674590, EPI_ISL_1674591, EPI_ISL_1674592, EPI_ISL_1674593, EPI_ISL_1674595, EPI_ISL_1674597, EPI_ISL_1674598, EPI_ISL_1674599, EPI_ISL_1674601, EPI_ISL_1674602, EPI_ISL_1674604, EPI_ISL_1674605, EPI_ISL_1674606, EPI_ISL_1674607, EPI_ISL_1674608, EPI_ISL_1674609, EPI_ISL_1674611, EPI_ISL_1674613, EPI_ISL_1674614, EPI_ISL_1674615, EPI_ISL_1674616, EPI_ISL_1674618, EPI_ISL_1674620, EPI_ISL_1674623, EPI_ISL_1674624, EPI_ISL_1674625, EPI_ISL_1674627, EPI_ISL_1674629, EPI_ISL_1674638, EPI_ISL_1674639, EPI_ISL_1674640, EPI_ISL_1674641, EPI_ISL_1674642, EPI_ISL_1674643, EPI_ISL_1674644, EPI_ISL_1674645, EPI_ISL_1674646, EPI_ISL_1674647, EPI_ISL_1674648, EPI_ISL_1674650, EPI_ISL_1674651, EPI_ISL_1674652, EPI_ISL_1674656, EPI_ISL_1674658, EPI_ISL_1674659, EPI_ISL_1674662, EPI_ISL_1674663, EPI_ISL_1674664, EPI_ISL_1674665, EPI_ISL_1674666, EPI_ISL_1674669, EPI_ISL_1674670, EPI_ISL_1674671, EPI_ISL_1674672, EPI_ISL_1674676, EPI_ISL_1674678, EPI_ISL_1674679, EPI_ISL_1674680, EPI_ISL_1674681, EPI_ISL_1674682, EPI_ISL_1674683, EPI_ISL_1674684, EPI_ISL_1674685, EPI_ISL_1674686, EPI_ISL_1674687, EPI_ISL_1674689, EPI_ISL_1674692 |                                                                                                                                                                                |                                                                                                                                                |                                                                                                                                                                                                                                                                                                                                                                                                                 |  |
| see above                                                                                                                                                                                                                                                                                                                                                                                                                                                                                                                                                                                                                                                                                                                                                                                                                                                                                                                                                                                                                                                                                                                                                                                                                                                                                                                                                                                                                                                                                                                                                                                                                                                                                                                        | Yale Clinical Virology Lab                                                                                                                                                     | Grubaugh Lab - Yale School of Public Health                                                                                                    | Joseph Fauver, Mallery Breban, Isabel Ott, Tara Alpert, Mary Petrone, Anderson Brito, Chantal Vogels, Annie Watkins, Chaney Kalinich, Jessica Rothman, Marie L. Landry, Nathan Grubaugh                                                                                                                                                                                                                         |  |
| EPI_ISL_1674700, EPI_ISL_1674701, EPI_ISL_1674705                                                                                                                                                                                                                                                                                                                                                                                                                                                                                                                                                                                                                                                                                                                                                                                                                                                                                                                                                                                                                                                                                                                                                                                                                                                                                                                                                                                                                                                                                                                                                                                                                                                                                | Murphy Medical Association                                                                                                                                                     | Grubaugh Lab - Yale School of Public Health                                                                                                    | Joseph Fauver, Mallery Breban, Isabel Ott, Tara Alpert, Mary Petrone, Anderson Brito, Chantal Vogels, Annie Watkins, Chaney Kalinich, Jessica Rothman, Caleb Neal, Eva Laszlo, Steven Murphy, Nathan Grubaugh                                                                                                                                                                                                   |  |
| EPI_ISL_1674706, EPI_ISL_1674707, EPI_ISL_1674708                                                                                                                                                                                                                                                                                                                                                                                                                                                                                                                                                                                                                                                                                                                                                                                                                                                                                                                                                                                                                                                                                                                                                                                                                                                                                                                                                                                                                                                                                                                                                                                                                                                                                | Grubaugh Lab - Yale School of Public Health                                                                                                                                    | Grubaugh Lab - Yale School of Public Health                                                                                                    | Joseph Fauver, Mallery Breban, Isabel Ott, Tara Alpert, Mary Petrone, Anderson Brito, Chantal Vogels, Annie Watkins, Chaney Kalinich, Jessica Rothman, Nathan Grubaugh                                                                                                                                                                                                                                          |  |
| EPI_ISL_1674775                                                                                                                                                                                                                                                                                                                                                                                                                                                                                                                                                                                                                                                                                                                                                                                                                                                                                                                                                                                                                                                                                                                                                                                                                                                                                                                                                                                                                                                                                                                                                                                                                                                                                                                  | Florida Bureau of Public Health Laboratories                                                                                                                                   | Florida Bureau of Public Health Laboratories                                                                                                   | Sarah Schmedes, Jason Blanton                                                                                                                                                                                                                                                                                                                                                                                   |  |
| EPI_ISL_1675011                                                                                                                                                                                                                                                                                                                                                                                                                                                                                                                                                                                                                                                                                                                                                                                                                                                                                                                                                                                                                                                                                                                                                                                                                                                                                                                                                                                                                                                                                                                                                                                                                                                                                                                  | Labo Analyses Med                                                                                                                                                              | National Reference Center for Viruses of Respiratory Infections, Institut Pasteur, Paris                                                       | Marion Barbet, Sylvie Behillil, Méline Bizard, Angela Brisebarre, Camille Capel, Vincent Enouf, Louise Lefrançois, Frédéric Lemoine, Christophe Malabat, Corinne Maufrais, Etienne Simon-Lorière, Maud Vanpeene, Sylvie Van der Werf ,Antoine Amiot                                                                                                                                                             |  |
| EPI_ISL_1675051                                                                                                                                                                                                                                                                                                                                                                                                                                                                                                                                                                                                                                                                                                                                                                                                                                                                                                                                                                                                                                                                                                                                                                                                                                                                                                                                                                                                                                                                                                                                                                                                                                                                                                                  | Hospital                                                                                                                                                                       | National Reference Center for Viruses of Respiratory Infections, Institut Pasteur, Paris                                                       | Marion Barbet, Sylvie Behillil, Méline Bizard, Angela Brisebarre, Camille Capel, Vincent Enouf, Louise Lefrançois, Frédéric Lemoine, Christophe Malabat, Corinne Maufrais, Etienne Simon-Lorière, Maud Vanpeene, Sylvie Van der Werf ,Nabil Gastli                                                                                                                                                              |  |
| EPI_ISL_1675087                                                                                                                                                                                                                                                                                                                                                                                                                                                                                                                                                                                                                                                                                                                                                                                                                                                                                                                                                                                                                                                                                                                                                                                                                                                                                                                                                                                                                                                                                                                                                                                                                                                                                                                  | Labo Analyses Med                                                                                                                                                              | National Reference Center for Viruses of Respiratory Infections, Institut Pasteur, Paris                                                       | Marion Barbet, Sylvie Behillil, Méline Bizard, Angela Brisebarre, Camille Capel, Vincent Enouf, Louise Lefrançois, Frédéric Lemoine, Christophe Malabat, Corinne Maufrais, Etienne Simon-Lorière, Maud Vanpeene, Sylvie Van der Werf ,Grégoire Potiron                                                                                                                                                          |  |
| EPI_ISL_1675100, EPI_ISL_1675131                                                                                                                                                                                                                                                                                                                                                                                                                                                                                                                                                                                                                                                                                                                                                                                                                                                                                                                                                                                                                                                                                                                                                                                                                                                                                                                                                                                                                                                                                                                                                                                                                                                                                                 | Alaska State Virology Laboratory                                                                                                                                               | Alaska State Virology Laboratory                                                                                                               | Stephanie DeRonde, Elva House, Lisa Smith, Ph.D., Jack Chen, Ph.D.                                                                                                                                                                                                                                                                                                                                              |  |
| EPI_ISL_1675309                                                                                                                                                                                                                                                                                                                                                                                                                                                                                                                                                                                                                                                                                                                                                                                                                                                                                                                                                                                                                                                                                                                                                                                                                                                                                                                                                                                                                                                                                                                                                                                                                                                                                                                  | CLÍNICA U BOLIVARIANA                                                                                                                                                          | Universidad Nacional de Colombia - Laboratorio Genómico One Health                                                                             | Simón Villegas Velásquez, Andres F. Cardona-Rios, María Stella López, Daniel O. Maldonado-Perez, Lina M. Hurtado, Laura Silvana Perez, Karl A Ciuderis, Maria Angélica Maya, Rita Almanza Payares, Idabely Betancur Ortiz, Sandra Ines Cano, Diego A. Alvarez-Diaz, Carlos Franco-Muñoz, Katherine Laiton-Donato, Hector Alejandro Ruiz-Moreno, Marcela Mercado-Reyes, Jorge E. Osorio, Juan P. Hernandez-Ortiz |  |
| EPI_ISL_1675320                                                                                                                                                                                                                                                                                                                                                                                                                                                                                                                                                                                                                                                                                                                                                                                                                                                                                                                                                                                                                                                                                                                                                                                                                                                                                                                                                                                                                                                                                                                                                                                                                                                                                                                  | SURA                                                                                                                                                                           | Universidad Nacional de Colombia - Laboratorio Genómico One Health                                                                             | María Stella López, Andres F. Cardona-Rios, Daniel O. Maldonado-Perez, Simón Villegas Velásquez, Lina M. Hurtado, Laura Silvana Perez, Karl A Ciuderis, Maria Angélica Maya, Rita Almanza Payares, Idabely Betancur Ortiz, Sandra Ines Cano, Diego A. Alvarez-Diaz, Carlos Franco-Muñoz, Katherine Laiton-Donato, Hector Alejandro Ruiz-Moreno, Marcela Mercado-Reyes, Jorge E. Osorio, Juan P. Hernandez-Ortiz |  |
| EPI_ISL_1675588, EPI_ISL_1675590, EPI_ISL_1675633, EPI_ISL_1675641, EPI_ISL_1675652                                                                                                                                                                                                                                                                                                                                                                                                                                                                                                                                                                                                                                                                                                                                                                                                                                                                                                                                                                                                                                                                                                                                                                                                                                                                                                                                                                                                                                                                                                                                                                                                                                              | Institute of Molecular and Translational Medicine / Laboratory of Experimental Medicine, Faculty of Medicine and Dentistry, Palacky University and University Hospital Olomouc | Institute of Molecular and Translational Medicine / Laboratory of Experimental Medicine, Faculty of Medicine and Dentistry, Palacky University | Rastislav Slavkovský, Hana Jaworek, Vladimira Koudeláková, Barbora Blumová, Tomáš Pospišil, Marián Hajdúch                                                                                                                                                                                                                                                                                                      |  |
| EPI_ISL_1677743                                                                                                                                                                                                                                                                                                                                                                                                                                                                                                                                                                                                                                                                                                                                                                                                                                                                                                                                                                                                                                                                                                                                                                                                                                                                                                                                                                                                                                                                                                                                                                                                                                                                                                                  | GMERS Medical College and Hospital, Gotri                                                                                                                                      | Gujarat Biotechnology Research Centre                                                                                                          | Zuber Saiyed,Ramesh Pandit,Janvi Raval,Zarna Patel,Nitin Savaliya,Dinesh Kumar,Twinkle Soni,Sonal Sharma ,Bithika Duttaroy,Umang Mishra,Nitesh Shah,Chaitanya Joshi,Madhvi Joshi                                                                                                                                                                                                                                |  |
| EPI_ISL_1677847                                                                                                                                                                                                                                                                                                                                                                                                                                                                                                                                                                                                                                                                                                                                                                                                                                                                                                                                                                                                                                                                                                                                                                                                                                                                                                                                                                                                                                                                                                                                                                                                                                                                                                                  | Department of Public Health Microbiology Ljubljana, National Laboratory for Health, Environment and Food                                                                       | Department for Public Health Microbiology Ljubljana, National Laboratory for Health, Environment and Food                                      | Tom Koritnik, José Gonçalves, Martin Bosilj, Natasa Berginc, Katarina Prosenec                                                                                                                                                                                                                                                                                                                                  |  |
| EPI_ISL_1678242, EPI_ISL_1678243                                                                                                                                                                                                                                                                                                                                                                                                                                                                                                                                                                                                                                                                                                                                                                                                                                                                                                                                                                                                                                                                                                                                                                                                                                                                                                                                                                                                                                                                                                                                                                                                                                                                                                 | "AR Dept. of Health-PHL, Molecular Diagnostics"                                                                                                                                | Centers for Disease Control and Prevention Division of Viral Diseases, Pathogen Discovery                                                      | Mili Sheth, Sarah Nobles, Jasmine Padilla, Mark Burroughs, Shoshona Le, Katie Dillon, Peter Cook, Clinton R. Paden, Dhvani Batra, Krista Queen, Kristen Knipe, Dakota Howard, Yvette Unoarumhi, Darlene Wagner, Matthew Schmeier, Ben L. Rambo-Martin, Kristine Lacek, Sam Shepard, Alison Laufer Halpin, Dave Wentworth, Vivien Dugan, Suxiang Tong, Justin Lee                                                |  |
| EPI_ISL_1678246                                                                                                                                                                                                                                                                                                                                                                                                                                                                                                                                                                                                                                                                                                                                                                                                                                                                                                                                                                                                                                                                                                                                                                                                                                                                                                                                                                                                                                                                                                                                                                                                                                                                                                                  | MS Public Health Laboratory                                                                                                                                                    | Centers for Disease Control and Prevention Division of Viral Diseases, Pathogen Discovery                                                      | Mili Sheth, Sarah Nobles, Jasmine Padilla, Mark Burroughs, Shoshona Le, Katie Dillon, Peter Cook, Clinton R. Paden, Dhvani Batra, Krista Queen, Kristen Knipe, Dakota Howard, Yvette Unoarumhi, Darlene Wagner, Matthew Schmeier, Ben L. Rambo-Martin, Kristine Lacek, Sam Shepard, Alison Laufer Halpin, Dave Wentworth, Vivien Dugan, Suxiang Tong, Justin Lee                                                |  |
| EPI_ISL_1678261, EPI_ISL_1678264                                                                                                                                                                                                                                                                                                                                                                                                                                                                                                                                                                                                                                                                                                                                                                                                                                                                                                                                                                                                                                                                                                                                                                                                                                                                                                                                                                                                                                                                                                                                                                                                                                                                                                 | NYC Department of Health and Mental Hygiene                                                                                                                                    | Centers for Disease Control and Prevention Division of Viral Diseases, Pathogen Discovery                                                      | Mili Sheth, Sarah Nobles, Jasmine Padilla, Mark Burroughs, Shoshona Le, Katie Dillon, Peter Cook, Clinton R. Paden, Dhvani Batra, Krista Queen, Kristen Knipe, Dakota Howard, Yvette Unoarumhi, Darlene Wagner, Matthew Schmeier, Ben L. Rambo-Martin, Kristine Lacek, Sam Shepard, Alison Laufer Halpin, Dave Wentworth, Vivien Dugan, Suxiang Tong, Justin Lee                                                |  |
| EPI_ISL_1678287                                                                                                                                                                                                                                                                                                                                                                                                                                                                                                                                                                                                                                                                                                                                                                                                                                                                                                                                                                                                                                                                                                                                                                                                                                                                                                                                                                                                                                                                                                                                                                                                                                                                                                                  | CA-Los Angeles County Public Health Laboratory                                                                                                                                 | Centers for Disease Control and Prevention Division of Viral Diseases, Pathogen Discovery                                                      | Mili Sheth, Sarah Nobles, Jasmine Padilla, Mark Burroughs, Shoshona Le, Katie Dillon, Peter Cook, Clinton R. Paden, Dhvani Batra, Krista Queen, Kristen Knipe, Dakota Howard, Yvette Unoarumhi, Darlene Wagner, Matthew Schmeier, Ben L. Rambo-Martin, Kristine Lacek, Sam Shepard, Alison Laufer Halpin, Dave Wentworth, Vivien Dugan, Suxiang Tong, Justin Lee                                                |  |
| EPI_ISL_1678289                                                                                                                                                                                                                                                                                                                                                                                                                                                                                                                                                                                                                                                                                                                                                                                                                                                                                                                                                                                                                                                                                                                                                                                                                                                                                                                                                                                                                                                                                                                                                                                                                                                                                                                  | DC Public Health Lab/ Dept. of Forensic Sciences                                                                                                                               | Centers for Disease Control and Prevention Division of Viral Diseases, Pathogen Discovery                                                      | Mili Sheth, Sarah Nobles, Jasmine Padilla, Mark Burroughs, Shoshona Le, Katie Dillon, Peter Cook, Clinton R. Paden, Dhvani Batra, Krista Queen, Kristen Knipe, Dakota Howard, Yvette Unoarumhi, Darlene Wagner, Matthew Schmeier, Ben L. Rambo-Martin, Kristine Lacek, Sam Shepard, Alison Laufer Halpin, Dave Wentworth, Vivien Dugan, Suxiang Tong, Justin Lee                                                |  |
| EPI_ISL_1678296                                                                                                                                                                                                                                                                                                                                                                                                                                                                                                                                                                                                                                                                                                                                                                                                                                                                                                                                                                                                                                                                                                                                                                                                                                                                                                                                                                                                                                                                                                                                                                                                                                                                                                                  | FL Bur. of Public Health Laboratories-Jacksonville                                                                                                                             | Centers for Disease Control and Prevention Division of Viral Diseases, Pathogen Discovery                                                      | Mili Sheth, Sarah Nobles, Jasmine Padilla, Mark Burroughs, Shoshona Le, Katie Dillon, Peter Cook, Clinton R. Paden, Dhvani Batra, Krista Queen, Kristen Knipe, Dakota Howard, Yvette Unoarumhi, Darlene Wagner, Matthew Schmeier, Ben L. Rambo-Martin, Kristine Lacek, Sam Shepard, Alison Laufer Halpin, Dave Wentworth, Vivien Dugan, Suxiang Tong, Justin Lee                                                |  |
| EPI_ISL_1678311                                                                                                                                                                                                                                                                                                                                                                                                                                                                                                                                                                                                                                                                                                                                                                                                                                                                                                                                                                                                                                                                                                                                                                                                                                                                                                                                                                                                                                                                                                                                                                                                                                                                                                                  | SC Dept of Health and Env. Control-Bureau of Laboratories                                                                                                                      | Centers for Disease Control and Prevention Division of Viral Diseases, Pathogen Discovery                                                      | Mili Sheth, Sarah Nobles, Jasmine Padilla, Mark Burroughs, Shoshona Le, Katie Dillon, Peter Cook, Clinton R. Paden, Dhvani Batra, Krista Queen, Kristen Knipe, Dakota Howard, Yvette Unoarumhi, Darlene Wagner, Matthew Schmeier, Ben L. Rambo-Martin, Kristine Lacek, Sam Shepard, Alison Laufer Halpin, Dave Wentworth, Vivien Dugan, Suxiang Tong, Justin Lee                                                |  |

|                                                                                                                                                                                                                                                                                                                                                                                                                                                                                                                                                                                                                                                                                                                                                                                                                                                                                                                                                                                                                                                                                                                                                                                                                                                                                                                                                                                                                                                                                                                                                                                                                                                                                                                                                                                                                                                                                                                                                                                                                                                                                                                                                                                                                                                                                                                                                                                                                                                                                                                                                                                                                                                                                                                                                                                                                                                                                                                                                                                                                                                                                                                                                                                                                                                                                                                                                                                                                                                                                                                                                                                                                                              |                                                   |                                                                                                        |                                                                                                                                                                                                                                                                                                                                                                                                                                                                                                                                                                                                                                                                                                                                                                                                                                                                                                                                                                                                                                                  |
|----------------------------------------------------------------------------------------------------------------------------------------------------------------------------------------------------------------------------------------------------------------------------------------------------------------------------------------------------------------------------------------------------------------------------------------------------------------------------------------------------------------------------------------------------------------------------------------------------------------------------------------------------------------------------------------------------------------------------------------------------------------------------------------------------------------------------------------------------------------------------------------------------------------------------------------------------------------------------------------------------------------------------------------------------------------------------------------------------------------------------------------------------------------------------------------------------------------------------------------------------------------------------------------------------------------------------------------------------------------------------------------------------------------------------------------------------------------------------------------------------------------------------------------------------------------------------------------------------------------------------------------------------------------------------------------------------------------------------------------------------------------------------------------------------------------------------------------------------------------------------------------------------------------------------------------------------------------------------------------------------------------------------------------------------------------------------------------------------------------------------------------------------------------------------------------------------------------------------------------------------------------------------------------------------------------------------------------------------------------------------------------------------------------------------------------------------------------------------------------------------------------------------------------------------------------------------------------------------------------------------------------------------------------------------------------------------------------------------------------------------------------------------------------------------------------------------------------------------------------------------------------------------------------------------------------------------------------------------------------------------------------------------------------------------------------------------------------------------------------------------------------------------------------------------------------------------------------------------------------------------------------------------------------------------------------------------------------------------------------------------------------------------------------------------------------------------------------------------------------------------------------------------------------------------------------------------------------------------------------------------------------------|---------------------------------------------------|--------------------------------------------------------------------------------------------------------|--------------------------------------------------------------------------------------------------------------------------------------------------------------------------------------------------------------------------------------------------------------------------------------------------------------------------------------------------------------------------------------------------------------------------------------------------------------------------------------------------------------------------------------------------------------------------------------------------------------------------------------------------------------------------------------------------------------------------------------------------------------------------------------------------------------------------------------------------------------------------------------------------------------------------------------------------------------------------------------------------------------------------------------------------|
| EPI_ISL_1678324, EPI_ISL_1678327                                                                                                                                                                                                                                                                                                                                                                                                                                                                                                                                                                                                                                                                                                                                                                                                                                                                                                                                                                                                                                                                                                                                                                                                                                                                                                                                                                                                                                                                                                                                                                                                                                                                                                                                                                                                                                                                                                                                                                                                                                                                                                                                                                                                                                                                                                                                                                                                                                                                                                                                                                                                                                                                                                                                                                                                                                                                                                                                                                                                                                                                                                                                                                                                                                                                                                                                                                                                                                                                                                                                                                                                             | ID Bureau of Laboratories                         | Centers for Disease Control and Prevention Division of Viral Diseases, Pathogen Discovery              | Mili Sheth, Sarah Nobles, Jasmine Padilla, Mark Burroughs, Shoshona Le, Katie Dillon, Peter Cook, Clinton R. Paden, Dhwani Batra, Krista Queen, Kristen Knipe, Dakota Howard, Yvette Unoarumhi, Darlene Wagner, Matthew Schmeier, Ben L. Rambo-Martin, Kristine Lacek, Sam Shepard, Alison Laufer Halpin, Dave Wentworth, Vivien Dugan, Suxiang Tong, Justin Lee                                                                                                                                                                                                                                                                                                                                                                                                                                                                                                                                                                                                                                                                                 |
| EPI_ISL_1678335                                                                                                                                                                                                                                                                                                                                                                                                                                                                                                                                                                                                                                                                                                                                                                                                                                                                                                                                                                                                                                                                                                                                                                                                                                                                                                                                                                                                                                                                                                                                                                                                                                                                                                                                                                                                                                                                                                                                                                                                                                                                                                                                                                                                                                                                                                                                                                                                                                                                                                                                                                                                                                                                                                                                                                                                                                                                                                                                                                                                                                                                                                                                                                                                                                                                                                                                                                                                                                                                                                                                                                                                                              | "PA Department of Health, Bureau of Laboratories" | Centers for Disease Control and Prevention Division of Viral Diseases, Pathogen Discovery              | Mili Sheth, Sarah Nobles, Jasmine Padilla, Mark Burroughs, Shoshona Le, Katie Dillon, Peter Cook, Clinton R. Paden, Dhwani Batra, Krista Queen, Kristen Knipe, Dakota Howard, Yvette Unoarumhi, Darlene Wagner, Matthew Schmeier, Ben L. Rambo-Martin, Kristine Lacek, Sam Shepard, Alison Laufer Halpin, Dave Wentworth, Vivien Dugan, Suxiang Tong, Justin Lee                                                                                                                                                                                                                                                                                                                                                                                                                                                                                                                                                                                                                                                                                 |
| EPI_ISL_1678436                                                                                                                                                                                                                                                                                                                                                                                                                                                                                                                                                                                                                                                                                                                                                                                                                                                                                                                                                                                                                                                                                                                                                                                                                                                                                                                                                                                                                                                                                                                                                                                                                                                                                                                                                                                                                                                                                                                                                                                                                                                                                                                                                                                                                                                                                                                                                                                                                                                                                                                                                                                                                                                                                                                                                                                                                                                                                                                                                                                                                                                                                                                                                                                                                                                                                                                                                                                                                                                                                                                                                                                                                              | HG Pharma GmbH                                    | Bergthaler laboratory, CeMM Research Center for Molecular Medicine of the Austrian Academy of Sciences | Lukas Endler, Anna Schedl, Fabian Amman, Petr Triska, Thomas Penz, Benedikt Agerer, Maëlle Le Moing, Michael Schuster, Bekir Erguner, Jan Laine, Martin Senekowitsch, Christoph Bock, Andreas Bergthaler                                                                                                                                                                                                                                                                                                                                                                                                                                                                                                                                                                                                                                                                                                                                                                                                                                         |
| EPI_ISL_1679012, EPI_ISL_1679029, EPI_ISL_1679104, EPI_ISL_1679226, EPI_ISL_1679230, EPI_ISL_1679237, EPI_ISL_1679322, EPI_ISL_1679443, EPI_ISL_1679444, EPI_ISL_1679640, EPI_ISL_1679702, EPI_ISL_1679762                                                                                                                                                                                                                                                                                                                                                                                                                                                                                                                                                                                                                                                                                                                                                                                                                                                                                                                                                                                                                                                                                                                                                                                                                                                                                                                                                                                                                                                                                                                                                                                                                                                                                                                                                                                                                                                                                                                                                                                                                                                                                                                                                                                                                                                                                                                                                                                                                                                                                                                                                                                                                                                                                                                                                                                                                                                                                                                                                                                                                                                                                                                                                                                                                                                                                                                                                                                                                                   | see above                                         | Centers for Disease Control and Prevention Division of Viral Diseases, Pathogen Discovery              | Dakota Howard, Dhwani Batra, Peter W. Cook, Kara Moser, Adrian Paskey, Jason Caravas, Benjamin Rambo-Martin, Shatavia Morrison, Christopher Gulvick, Scott Sammons, Yvette Unoarumhi, Darlene Wagner, Matthew Schmeier, Eileen de Feo, Jan Antico, Christine Tran, Matthew Tolentino, Shannon Wickline, Kim Gietzen, Brad Sickler, Jingtao Liu, Eric Allen, Phil Febbo, Nicole L. Washington, Simon White, Geraint Levine, Kelly Schiaber Barrett, Elizabeth Cirulli, Alexandre Bolze, Ary Ascencio, Charlotte Rivera-Garcia, Ryan Cho, Jason Nguyen, Sherry Wang, Jimmy Ramanz, Tyler Cassens, Efrén Sandoval, Magnus Isaksson, William Lee, David Becker, Marc Laurent, James Lu, Clinton R. Paden, Duncan MacCannell                                                                                                                                                                                                                                                                                                                          |
| EPI_ISL_1679875, EPI_ISL_1680065                                                                                                                                                                                                                                                                                                                                                                                                                                                                                                                                                                                                                                                                                                                                                                                                                                                                                                                                                                                                                                                                                                                                                                                                                                                                                                                                                                                                                                                                                                                                                                                                                                                                                                                                                                                                                                                                                                                                                                                                                                                                                                                                                                                                                                                                                                                                                                                                                                                                                                                                                                                                                                                                                                                                                                                                                                                                                                                                                                                                                                                                                                                                                                                                                                                                                                                                                                                                                                                                                                                                                                                                             | UW Virology Lab                                   | UW Virology Lab                                                                                        | Pavitra Roychoudhury, Hong Xie, Lasata Shrestha, Shah Mohamed Bakhsh, Michelle Lin, Noah R. Baker, Sean Ellis, Meei-Li Huang, Keith R Jerome, Alexander Greninger                                                                                                                                                                                                                                                                                                                                                                                                                                                                                                                                                                                                                                                                                                                                                                                                                                                                                |
| EPI_ISL_1680147                                                                                                                                                                                                                                                                                                                                                                                                                                                                                                                                                                                                                                                                                                                                                                                                                                                                                                                                                                                                                                                                                                                                                                                                                                                                                                                                                                                                                                                                                                                                                                                                                                                                                                                                                                                                                                                                                                                                                                                                                                                                                                                                                                                                                                                                                                                                                                                                                                                                                                                                                                                                                                                                                                                                                                                                                                                                                                                                                                                                                                                                                                                                                                                                                                                                                                                                                                                                                                                                                                                                                                                                                              | Helix/Illumina                                    | Centers for Disease Control and Prevention Division of Viral Diseases, Pathogen Discovery              | Dakota Howard, Dhwani Batra, Peter W. Cook, Kara Moser, Adrian Paskey, Jason Caravas, Benjamin Rambo-Martin, Shatavia Morrison, Christopher Gulvick, Scott Sammons, Yvette Unoarumhi, Darlene Wagner, Matthew Schmeier, Eileen de Feo, Jan Antico, Christine Tran, Matthew Tolentino, Shannon Wickline, Kim Gietzen, Brad Sickler, Jingtao Liu, Eric Allen, Phil Febbo, Nicole L. Washington, Simon White, Geraint Levine, Kelly Schiaber Barrett, Elizabeth Cirulli, Alexandre Bolze, Ary Ascencio, Charlotte Rivera-Garcia, Ryan Cho, Jason Nguyen, Sherry Wang, Jimmy Ramanz, Tyler Cassens, Efrén Sandoval, Magnus Isaksson, William Lee, David Becker, Marc Laurent, James Lu, Clinton R. Paden, Duncan MacCannell                                                                                                                                                                                                                                                                                                                          |
| EPI_ISL_1680477, EPI_ISL_1680487, EPI_ISL_1680542, EPI_ISL_1680543, EPI_ISL_1680544, EPI_ISL_1680554, EPI_ISL_1680588, EPI_ISL_1680593, EPI_ISL_1680604, EPI_ISL_1680610, EPI_ISL_1680640, EPI_ISL_1680652, EPI_ISL_1680657, EPI_ISL_1680674, EPI_ISL_1680685, EPI_ISL_1680699, EPI_ISL_1680694, EPI_ISL_1680695, EPI_ISL_1680696, EPI_ISL_1680697, EPI_ISL_1680700, EPI_ISL_1680718, EPI_ISL_1680745, EPI_ISL_1680769, EPI_ISL_1680773, EPI_ISL_1680774, EPI_ISL_1680775, EPI_ISL_1680777, EPI_ISL_1680782, EPI_ISL_1680783, EPI_ISL_1680784, EPI_ISL_1680789, EPI_ISL_1680791, EPI_ISL_1680821, EPI_ISL_1680833, EPI_ISL_1680877, EPI_ISL_1680878, EPI_ISL_1680937, EPI_ISL_1680938, EPI_ISL_1681044, EPI_ISL_1681062, EPI_ISL_1681076, EPI_ISL_1681124, EPI_ISL_1681170, EPI_ISL_1681177, EPI_ISL_1681185, EPI_ISL_1681195, EPI_ISL_1681199, EPI_ISL_1681200, EPI_ISL_1681205, EPI_ISL_1681208, EPI_ISL_1681224, EPI_ISL_1681225, EPI_ISL_1681256, EPI_ISL_1681273, EPI_ISL_1681308, EPI_ISL_1681332, EPI_ISL_1681334, EPI_ISL_1681337, EPI_ISL_1681339, EPI_ISL_1681345, EPI_ISL_1681346, EPI_ISL_1681347, EPI_ISL_1681349, EPI_ISL_1681351, EPI_ISL_1681358, EPI_ISL_1681373, EPI_ISL_1681375, EPI_ISL_1681376, EPI_ISL_1681406, EPI_ISL_1681407, EPI_ISL_1681425, EPI_ISL_1681427, EPI_ISL_1681430, EPI_ISL_1681430, EPI_ISL_1681453, EPI_ISL_1681454, EPI_ISL_1681456, EPI_ISL_1681457, EPI_ISL_1681476, EPI_ISL_1681506, EPI_ISL_1681533, EPI_ISL_1681545, EPI_ISL_1681582, EPI_ISL_1681595, EPI_ISL_1681610, EPI_ISL_1681612, EPI_ISL_1681617, EPI_ISL_1681634, EPI_ISL_1681658, EPI_ISL_1681665, EPI_ISL_1681667, EPI_ISL_1681682, EPI_ISL_1681685, EPI_ISL_1681694, EPI_ISL_1681773, EPI_ISL_1681896, EPI_ISL_1681897, EPI_ISL_1681904, EPI_ISL_1682045, EPI_ISL_1682069, EPI_ISL_1682071, EPI_ISL_1682323, EPI_ISL_1682332, EPI_ISL_1682432, EPI_ISL_1682481, EPI_ISL_1682522, EPI_ISL_1682528, EPI_ISL_1682530, EPI_ISL_1682534, EPI_ISL_1682839, EPI_ISL_1682877, EPI_ISL_1682897, EPI_ISL_1682898, EPI_ISL_1682967, EPI_ISL_1683058, EPI_ISL_1683061, EPI_ISL_1683088, EPI_ISL_1683098, EPI_ISL_1683106, EPI_ISL_1683122, EPI_ISL_1683135, EPI_ISL_1683137, EPI_ISL_1683139, EPI_ISL_1683140, EPI_ISL_1683144, EPI_ISL_1683147, EPI_ISL_1683166, EPI_ISL_1683169, EPI_ISL_1683173, EPI_ISL_1683180, EPI_ISL_1683189, EPI_ISL_1683211, EPI_ISL_1683212, EPI_ISL_1683213, EPI_ISL_1683215, EPI_ISL_1683224, EPI_ISL_1683230, EPI_ISL_1683231, EPI_ISL_1683239, EPI_ISL_1683240, EPI_ISL_1683249, EPI_ISL_1683251, EPI_ISL_1683260, EPI_ISL_1683262, EPI_ISL_1683264, EPI_ISL_1683265, EPI_ISL_1683294, EPI_ISL_1683295, EPI_ISL_1683304, EPI_ISL_1683307, EPI_ISL_1683312, EPI_ISL_1683316, EPI_ISL_1683320, EPI_ISL_1683321, EPI_ISL_1683322, EPI_ISL_1683327, EPI_ISL_1683330, EPI_ISL_1683335, EPI_ISL_1683338, EPI_ISL_1683339, EPI_ISL_1683347, EPI_ISL_1683358, EPI_ISL_1683360, EPI_ISL_1683365, EPI_ISL_1683367, EPI_ISL_1683368, EPI_ISL_1683376, EPI_ISL_1683381, EPI_ISL_1683408, EPI_ISL_1683441, EPI_ISL_1683461, EPI_ISL_1683495, EPI_ISL_1683498, EPI_ISL_1683503, EPI_ISL_1683505, EPI_ISL_1683506, EPI_ISL_1683526, EPI_ISL_1683537, EPI_ISL_1683544, EPI_ISL_1683576, EPI_ISL_1683578, EPI_ISL_1683613, EPI_ISL_1683640, EPI_ISL_1683642, EPI_ISL_1683646, EPI_ISL_1683649, EPI_ISL_1683659, EPI_ISL_1683670, EPI_ISL_1683672, EPI_ISL_1683681, EPI_ISL_1683684, EPI_ISL_1683688, EPI_ISL_1683701, EPI_ISL_1683703, EPI_ISL_1683704, EPI_ISL_1683707, EPI_ISL_1683720, EPI_ISL_1683735, EPI_ISL_1683746, EPI_ISL_1683756, EPI_ISL_1683759, EPI_ISL_1683769, EPI_ISL_1683778, EPI_ISL_1683792, EPI_ISL_1683793 |                                                   |                                                                                                        |                                                                                                                                                                                                                                                                                                                                                                                                                                                                                                                                                                                                                                                                                                                                                                                                                                                                                                                                                                                                                                                  |
| see above                                                                                                                                                                                                                                                                                                                                                                                                                                                                                                                                                                                                                                                                                                                                                                                                                                                                                                                                                                                                                                                                                                                                                                                                                                                                                                                                                                                                                                                                                                                                                                                                                                                                                                                                                                                                                                                                                                                                                                                                                                                                                                                                                                                                                                                                                                                                                                                                                                                                                                                                                                                                                                                                                                                                                                                                                                                                                                                                                                                                                                                                                                                                                                                                                                                                                                                                                                                                                                                                                                                                                                                                                                    | Laboratory Corporation of America                 | Centers for Disease Control and Prevention Division of Viral Diseases, Pathogen Discovery              | Dakota Howard, Dhwani Batra, Peter W. Cook, Kara Moser, Adrian Paskey, Jason Caravas, Benjamin Rambo-Martin, Shatavia Morrison, Christopher Gulvick, Scott Sammons, Yvette Unoarumhi, Darlene Wagner, Matthew Schmeier, Minoog Agarwal, Eyad Almasri, Debbie Boles, Ayla Burns, Nuthawin Charoensri, Oren Cohen, Susan Countryman, Mary Ann Cristobal, Bobbi Cro, Suzanne Dale, Hrushikesh Deshmukh, Amanda Douglas, Vincent Drouillon, Marcia Eisenberg, Howard Engler, Rama Ghatti, Prashant Gupta, Susan Hicks, Jake Humphrey, Lax Iyer, Manoj Jain, Mohan Kolli, Brian Krueger, Tim Kuphal, Stanley Letovsky, Michael Levandoski, Craig Lukasik, Jonathan Meltzer, Brian Norvell, Mindy Nye, Scott Parker, Christos Petropoulos, John Pruitt, Steven Ragan, Scott Ryan, Mike Sapeta, Jana Schroth, Suresh Babu Selvaraju, Goran Stevoic, Amanda Suchanek, Andrea Throop, Lyndon Tilson, Thomas Urban, Joe Voshell, Kimberly Wagner, Jonathan Williams, Mary Williamson, Qian Zeng, Tricia Zwielfelhofer, Clinton R. Paden, Duncan MacCannell |
| EPI_ISL_1683801                                                                                                                                                                                                                                                                                                                                                                                                                                                                                                                                                                                                                                                                                                                                                                                                                                                                                                                                                                                                                                                                                                                                                                                                                                                                                                                                                                                                                                                                                                                                                                                                                                                                                                                                                                                                                                                                                                                                                                                                                                                                                                                                                                                                                                                                                                                                                                                                                                                                                                                                                                                                                                                                                                                                                                                                                                                                                                                                                                                                                                                                                                                                                                                                                                                                                                                                                                                                                                                                                                                                                                                                                              | HOSPITAL UNIVERSITARIO INSULAR DE GRAN CANARIA    | Instituto de Salud Carlos III                                                                          | Vázquez-Morón, S. Iglesias-Caballero, M. Sandonis, V. Camarero, S. Pozo, F. Casas, I. Jiménez, P. Zaballos, A. Monzón, S. Varona, S. Cuesta, I. DEL ROSARIO QUINTANA, CRISTOBAL                                                                                                                                                                                                                                                                                                                                                                                                                                                                                                                                                                                                                                                                                                                                                                                                                                                                  |
| EPI_ISL_1683804, EPI_ISL_1683818, EPI_ISL_1683833, EPI_ISL_1683842, EPI_ISL_1683846, EPI_ISL_1683855, EPI_ISL_1683860, EPI_ISL_1683897, EPI_ISL_1683898, EPI_ISL_1683910, EPI_ISL_1683915, EPI_ISL_1683970                                                                                                                                                                                                                                                                                                                                                                                                                                                                                                                                                                                                                                                                                                                                                                                                                                                                                                                                                                                                                                                                                                                                                                                                                                                                                                                                                                                                                                                                                                                                                                                                                                                                                                                                                                                                                                                                                                                                                                                                                                                                                                                                                                                                                                                                                                                                                                                                                                                                                                                                                                                                                                                                                                                                                                                                                                                                                                                                                                                                                                                                                                                                                                                                                                                                                                                                                                                                                                   | see above                                         | Centers for Disease Control and Prevention Division of Viral Diseases, Pathogen Discovery              | Dakota Howard, Dhwani Batra, Peter W. Cook, Kara Moser, Adrian Paskey, Jason Caravas, Benjamin Rambo-Martin, Shatavia Morrison, Christopher Gulvick, Scott Sammons, Yvette Unoarumhi, Darlene Wagner, Matthew Schmeier, Minoog Agarwal, Eyad Almasri, Debbie Boles, Ayla Burns, Nuthawin Charoensri, Oren Cohen, Susan Countryman, Mary Ann Cristobal, Bobbi Cro, Suzanne Dale, Hrushikesh Deshmukh, Amanda Douglas, Vincent Drouillon, Marcia Eisenberg, Howard Engler, Rama Ghatti, Prashant Gupta, Susan Hicks, Jake Humphrey, Lax Iyer, Manoj Jain, Mohan Kolli, Brian Krueger, Tim Kuphal, Stanley Letovsky, Michael Levandoski, Craig Lukasik, Jonathan Meltzer, Brian Norvell, Mindy Nye, Scott Parker, Christos Petropoulos, John Pruitt, Steven Ragan, Scott Ryan, Mike Sapeta, Jana Schroth, Suresh Babu Selvaraju, Goran Stevoic, Amanda Suchanek, Andrea Throop, Lyndon Tilson, Thomas Urban, Joe Voshell, Kimberly Wagner, Jonathan Williams, Mary Williamson, Qian Zeng, Tricia Zwielfelhofer, Clinton R. Paden, Duncan MacCannell |
| EPI_ISL_1684018                                                                                                                                                                                                                                                                                                                                                                                                                                                                                                                                                                                                                                                                                                                                                                                                                                                                                                                                                                                                                                                                                                                                                                                                                                                                                                                                                                                                                                                                                                                                                                                                                                                                                                                                                                                                                                                                                                                                                                                                                                                                                                                                                                                                                                                                                                                                                                                                                                                                                                                                                                                                                                                                                                                                                                                                                                                                                                                                                                                                                                                                                                                                                                                                                                                                                                                                                                                                                                                                                                                                                                                                                              | HOSPITAL UNIVERSITARIO VIRGEN DE LA ARRIXACA      | Instituto de Salud Carlos III                                                                          | Sandonis, V. Vázquez-Morón, S. Iglesias-Caballero, M. Camarero, S. Pozo, F. Casas, I. Jiménez, P. Zaballos, A. Monzón, S. Varona, S. Cuesta, I. MORENO PARRADO, LAURA                                                                                                                                                                                                                                                                                                                                                                                                                                                                                                                                                                                                                                                                                                                                                                                                                                                                            |
| EPI_ISL_1684068, EPI_ISL_1684072, EPI_ISL_1684081, EPI_ISL_1684085, EPI_ISL_1684098, EPI_ISL_1684104, EPI_ISL_1684125, EPI_ISL_1684139, EPI_ISL_1684143, EPI_ISL_1684147, EPI_ISL_1684182, EPI_ISL_1684193, EPI_ISL_1684204, EPI_ISL_1684209, EPI_ISL_1684210, EPI_ISL_1684216, EPI_ISL_1684217, EPI_ISL_1684221, EPI_ISL_1684222, EPI_ISL_1684235, EPI_ISL_1684240, EPI_ISL_1684246, EPI_ISL_1684261, EPI_ISL_1684263, EPI_ISL_1684264, EPI_ISL_1684267, EPI_ISL_1684271, EPI_ISL_1684273, EPI_ISL_1684280, EPI_ISL_1684284, EPI_ISL_1684285, EPI_ISL_1684298, EPI_ISL_1684388, EPI_ISL_1684384, EPI_ISL_1684508, EPI_ISL_1684522, EPI_ISL_1684573, EPI_ISL_1684584, EPI_ISL_1684633, EPI_ISL_1684671, EPI_ISL_1684708, EPI_ISL_1684718, EPI_ISL_1684719, EPI_ISL_1684720, EPI_ISL_1684728, EPI_ISL_1684731, EPI_ISL_1684815, EPI_ISL_1684865, EPI_ISL_1684959, EPI_ISL_1684961, EPI_ISL_1684965, EPI_ISL_1685016, EPI_ISL_1685019, EPI_ISL_1685077, EPI_ISL_1685102, EPI_ISL_1685142, EPI_ISL_1685161                                                                                                                                                                                                                                                                                                                                                                                                                                                                                                                                                                                                                                                                                                                                                                                                                                                                                                                                                                                                                                                                                                                                                                                                                                                                                                                                                                                                                                                                                                                                                                                                                                                                                                                                                                                                                                                                                                                                                                                                                                                                                                                                                                                                                                                                                                                                                                                                                                                                                                                                                                                                                                      |                                                   |                                                                                                        |                                                                                                                                                                                                                                                                                                                                                                                                                                                                                                                                                                                                                                                                                                                                                                                                                                                                                                                                                                                                                                                  |
| see above                                                                                                                                                                                                                                                                                                                                                                                                                                                                                                                                                                                                                                                                                                                                                                                                                                                                                                                                                                                                                                                                                                                                                                                                                                                                                                                                                                                                                                                                                                                                                                                                                                                                                                                                                                                                                                                                                                                                                                                                                                                                                                                                                                                                                                                                                                                                                                                                                                                                                                                                                                                                                                                                                                                                                                                                                                                                                                                                                                                                                                                                                                                                                                                                                                                                                                                                                                                                                                                                                                                                                                                                                                    | Laboratory Corporation of America                 | Centers for Disease Control and Prevention Division of Viral Diseases, Pathogen Discovery              | Dakota Howard, Dhwani Batra, Peter W. Cook, Kara Moser, Adrian Paskey, Jason Caravas, Benjamin Rambo-Martin, Shatavia Morrison, Christopher Gulvick, Scott Sammons, Yvette Unoarumhi, Darlene Wagner, Matthew Schmeier, Minoog Agarwal, Eyad Almasri, Debbie Boles, Ayla Burns, Nuthawin Charoensri, Oren Cohen, Susan Countryman, Mary Ann Cristobal, Bobbi Cro, Suzanne Dale, Hrushikesh Deshmukh, Amanda Douglas, Vincent Drouillon, Marcia Eisenberg, Howard Engler, Rama Ghatti, Prashant Gupta, Susan Hicks, Jake Humphrey, Lax Iyer, Manoj Jain, Mohan Kolli, Brian Krueger, Tim Kuphal, Stanley Letovsky, Michael Levandoski, Craig Lukasik, Jonathan Meltzer, Brian Norvell, Mindy Nye, Scott Parker, Christos Petropoulos, John Pruitt, Steven Ragan, Scott Ryan, Mike Sapeta, Jana Schroth, Suresh Babu Selvaraju, Goran Stevoic, Amanda Suchanek, Andrea Throop, Lyndon Tilson, Thomas Urban, Joe Voshell, Kimberly Wagner, Jonathan Williams, Mary Williamson, Qian Zeng, Tricia Zwielfelhofer, Clinton R. Paden, Duncan MacCannell |
| EPI_ISL_1685310, EPI_ISL_1685436, EPI_ISL_1685445                                                                                                                                                                                                                                                                                                                                                                                                                                                                                                                                                                                                                                                                                                                                                                                                                                                                                                                                                                                                                                                                                                                                                                                                                                                                                                                                                                                                                                                                                                                                                                                                                                                                                                                                                                                                                                                                                                                                                                                                                                                                                                                                                                                                                                                                                                                                                                                                                                                                                                                                                                                                                                                                                                                                                                                                                                                                                                                                                                                                                                                                                                                                                                                                                                                                                                                                                                                                                                                                                                                                                                                            | Synlab Eesti OÜ                                   | 1. Laboratory of Communicable Diseases (Estonia); 2. Eurofins Genomics Europe Sequencing GmbH          | Liidia Dotsenko et al.                                                                                                                                                                                                                                                                                                                                                                                                                                                                                                                                                                                                                                                                                                                                                                                                                                                                                                                                                                                                                           |
| EPI_ISL_1685468, EPI_ISL_1685514, EPI_ISL_1685560, EPI_ISL_1685591, EPI_ISL_1685612, EPI_ISL_1685622, EPI_ISL_1685645, EPI_ISL_1685664, EPI_ISL_1685754, EPI_ISL_1685759, EPI_ISL_1685783, EPI_ISL_1685794, EPI_ISL_1685798, EPI_ISL_1685802, EPI_ISL_1685803, EPI_ISL_1685804, EPI_ISL_1685814, EPI_ISL_1685816, EPI_ISL_1685823, EPI_ISL_1685827, EPI_ISL_1685835, EPI_ISL_1685850, EPI_ISL_1685930, EPI_ISL_1685933, EPI_ISL_1685948, EPI_ISL_1685967, EPI_ISL_1685968, EPI_ISL_1685978, EPI_ISL_1685983                                                                                                                                                                                                                                                                                                                                                                                                                                                                                                                                                                                                                                                                                                                                                                                                                                                                                                                                                                                                                                                                                                                                                                                                                                                                                                                                                                                                                                                                                                                                                                                                                                                                                                                                                                                                                                                                                                                                                                                                                                                                                                                                                                                                                                                                                                                                                                                                                                                                                                                                                                                                                                                                                                                                                                                                                                                                                                                                                                                                                                                                                                                                  | see above                                         | Centers for Disease Control and Prevention Division of Viral Diseases, Pathogen Discovery              | Dakota Howard, Dhwani Batra, Peter W. Cook, Kara Moser, Adrian Paskey, Jason Caravas, Benjamin Rambo-Martin, Shatavia Morrison, Christopher Gulvick, Scott Sammons, Yvette Unoarumhi, Darlene Wagner, Matthew Schmeier, Cynidi Clark, Patrick Campbell, Rob Case, Vikramsinha Ghorpade, Holly Houdeshell, Ola Kvalvaag, Dillon Nall, Ethan Sanders, Alec Vest, Shaun Westlund, Matthew Hardison, Clinton R. Paden, Duncan MacCannell                                                                                                                                                                                                                                                                                                                                                                                                                                                                                                                                                                                                             |
| EPI_ISL_1686052                                                                                                                                                                                                                                                                                                                                                                                                                                                                                                                                                                                                                                                                                                                                                                                                                                                                                                                                                                                                                                                                                                                                                                                                                                                                                                                                                                                                                                                                                                                                                                                                                                                                                                                                                                                                                                                                                                                                                                                                                                                                                                                                                                                                                                                                                                                                                                                                                                                                                                                                                                                                                                                                                                                                                                                                                                                                                                                                                                                                                                                                                                                                                                                                                                                                                                                                                                                                                                                                                                                                                                                                                              | Synlab Eesti OÜ                                   | 1. Laboratory of Communicable Diseases (Estonia); 2. Eurofins Genomics Europe Sequencing GmbH          | Liidia Dotsenko et al.                                                                                                                                                                                                                                                                                                                                                                                                                                                                                                                                                                                                                                                                                                                                                                                                                                                                                                                                                                                                                           |
| EPI_ISL_1686104, EPI_ISL_1686179, EPI_ISL_1686207, EPI_ISL_1686217                                                                                                                                                                                                                                                                                                                                                                                                                                                                                                                                                                                                                                                                                                                                                                                                                                                                                                                                                                                                                                                                                                                                                                                                                                                                                                                                                                                                                                                                                                                                                                                                                                                                                                                                                                                                                                                                                                                                                                                                                                                                                                                                                                                                                                                                                                                                                                                                                                                                                                                                                                                                                                                                                                                                                                                                                                                                                                                                                                                                                                                                                                                                                                                                                                                                                                                                                                                                                                                                                                                                                                           | Aegis Sciences Corporation                        | Centers for Disease Control and Prevention Division of Viral Diseases, Pathogen Discovery              | Dakota Howard, Dhwani Batra, Peter W. Cook, Kara Moser, Adrian Paskey, Jason Caravas, Benjamin Rambo-Martin, Shatavia Morrison, Christopher Gulvick, Scott Sammons, Yvette Unoarumhi, Darlene Wagner, Matthew Schmeier, Cynidi Clark, Patrick Campbell, Rob Case, Vikramsinha Ghorpade, Holly Houdeshell, Ola Kvalvaag, Dillon Nall, Ethan Sanders, Alec Vest, Shaun Westlund, Matthew Hardison, Clinton R. Paden, Duncan MacCannell                                                                                                                                                                                                                                                                                                                                                                                                                                                                                                                                                                                                             |
| EPI_ISL_1686231                                                                                                                                                                                                                                                                                                                                                                                                                                                                                                                                                                                                                                                                                                                                                                                                                                                                                                                                                                                                                                                                                                                                                                                                                                                                                                                                                                                                                                                                                                                                                                                                                                                                                                                                                                                                                                                                                                                                                                                                                                                                                                                                                                                                                                                                                                                                                                                                                                                                                                                                                                                                                                                                                                                                                                                                                                                                                                                                                                                                                                                                                                                                                                                                                                                                                                                                                                                                                                                                                                                                                                                                                              | Synlab Eesti OÜ                                   | 1. Laboratory of Communicable Diseases (Estonia); 2.                                                   | Liidia Dotsenko et al.                                                                                                                                                                                                                                                                                                                                                                                                                                                                                                                                                                                                                                                                                                                                                                                                                                                                                                                                                                                                                           |

## Eurofins Genomics Europe Sequencing GmbH

|                                                                                                                                                                                                                                                                                                                                                                                                                                                                                                                                                                                                                                                                                                                                                                                                                                                                                                                                                                                                                                                                                                                                                                                                                                                                                                                                                                                               |           |                                                       |                                                                                           |                                                                                                                                                                                                                                                                                                                                                                                                                                                                                                                                                                                                                                                                                                                         |
|-----------------------------------------------------------------------------------------------------------------------------------------------------------------------------------------------------------------------------------------------------------------------------------------------------------------------------------------------------------------------------------------------------------------------------------------------------------------------------------------------------------------------------------------------------------------------------------------------------------------------------------------------------------------------------------------------------------------------------------------------------------------------------------------------------------------------------------------------------------------------------------------------------------------------------------------------------------------------------------------------------------------------------------------------------------------------------------------------------------------------------------------------------------------------------------------------------------------------------------------------------------------------------------------------------------------------------------------------------------------------------------------------|-----------|-------------------------------------------------------|-------------------------------------------------------------------------------------------|-------------------------------------------------------------------------------------------------------------------------------------------------------------------------------------------------------------------------------------------------------------------------------------------------------------------------------------------------------------------------------------------------------------------------------------------------------------------------------------------------------------------------------------------------------------------------------------------------------------------------------------------------------------------------------------------------------------------------|
| EPI_ISL_1686278, EPI_ISL_1686383, EPI_ISL_1686416, EPI_ISL_1686523, EPI_ISL_1686525, EPI_ISL_1686536, EPI_ISL_1686681, EPI_ISL_1686684, EPI_ISL_1686703, EPI_ISL_1686760, EPI_ISL_1686772, EPI_ISL_1686782, EPI_ISL_1686783, EPI_ISL_1686790, EPI_ISL_1686819, EPI_ISL_1686942, EPI_ISL_1687022, EPI_ISL_1687115, EPI_ISL_1687117, EPI_ISL_1687119, EPI_ISL_1687141, EPI_ISL_1687147, EPI_ISL_1687152, EPI_ISL_1687194, EPI_ISL_1687198, EPI_ISL_1687201, EPI_ISL_1687211, EPI_ISL_1687236, EPI_ISL_1687305, EPI_ISL_1687355, EPI_ISL_1687368, EPI_ISL_1687380, EPI_ISL_1687388, EPI_ISL_1687456, EPI_ISL_1687470, EPI_ISL_1687476, EPI_ISL_1687498, EPI_ISL_1687500, EPI_ISL_1687504, EPI_ISL_1687507, EPI_ISL_1687511, EPI_ISL_1687519, EPI_ISL_1687520, EPI_ISL_1687528, EPI_ISL_1687562, EPI_ISL_1687569, EPI_ISL_1687614, EPI_ISL_1687624, EPI_ISL_1687738, EPI_ISL_1687753, EPI_ISL_1687781, EPI_ISL_1687817, EPI_ISL_1687839, EPI_ISL_1687844, EPI_ISL_1687848, EPI_ISL_1687890, EPI_ISL_1687967, EPI_ISL_1687980, EPI_ISL_1688004, EPI_ISL_1688053, EPI_ISL_1688061, EPI_ISL_1688080, EPI_ISL_1688089, EPI_ISL_1688134, EPI_ISL_1688143, EPI_ISL_1688258, EPI_ISL_1688297, EPI_ISL_1688322, EPI_ISL_1688345, EPI_ISL_1688376, EPI_ISL_1688416, EPI_ISL_1688421, EPI_ISL_1688426, EPI_ISL_1688452, EPI_ISL_1688494, EPI_ISL_1688504, EPI_ISL_1688539, EPI_ISL_1688548, EPI_ISL_1688551 | see above | Aegis Sciences Corporation                            | Centers for Disease Control and Prevention Division of Viral Diseases, Pathogen Discovery | Dakota Howard, Dhvani Batra, Peter W. Cook, Kara Moser, Adrian Paskey, Jason Caravas, Benjamin Rambo-Martin, Shatavia Morrison, Christopher Gulvick, Scott Sammons, Yvette Unoarumhi, Darlene Wagner, Matthew Schmerer, Cyndi Clark, Patrick Campbell, Rob Case, Vikramsinh Ghorpade, Holly Houdeshell, Ola Kvalvaag, Dillon Nall, Ethan Sanders, Alec Vest, Shaun Westlund, Matthew Hardison, Clinton R. Paden, Duncan MacCannell                                                                                                                                                                                                                                                                                      |
| EPI_ISL_1688648                                                                                                                                                                                                                                                                                                                                                                                                                                                                                                                                                                                                                                                                                                                                                                                                                                                                                                                                                                                                                                                                                                                                                                                                                                                                                                                                                                               |           | Sonora Quest Laboratories                             | TGen North                                                                                | Jolene Bowers, Heather Centner, Chris French, Hayley Yaglom, Ashlyn Pfeiffer, Darrin Lemmer, Dave Engelthaler, The Arizona COVID Genomics Union (ACGU)                                                                                                                                                                                                                                                                                                                                                                                                                                                                                                                                                                  |
| EPI_ISL_1688657, EPI_ISL_1688721, EPI_ISL_1688735, EPI_ISL_1688759, EPI_ISL_1688777, EPI_ISL_1688779, EPI_ISL_1688926, EPI_ISL_1688961, EPI_ISL_1689026, EPI_ISL_1689086, EPI_ISL_1689144, EPI_ISL_1689183                                                                                                                                                                                                                                                                                                                                                                                                                                                                                                                                                                                                                                                                                                                                                                                                                                                                                                                                                                                                                                                                                                                                                                                    | see above | Aegis Sciences Corporation                            | Centers for Disease Control and Prevention Division of Viral Diseases, Pathogen Discovery | Dakota Howard, Dhvani Batra, Peter W. Cook, Kara Moser, Adrian Paskey, Jason Caravas, Benjamin Rambo-Martin, Shatavia Morrison, Christopher Gulvick, Scott Sammons, Yvette Unoarumhi, Darlene Wagner, Matthew Schmerer, Cyndi Clark, Patrick Campbell, Rob Case, Vikramsinh Ghorpade, Holly Houdeshell, Ola Kvalvaag, Dillon Nall, Ethan Sanders, Alec Vest, Shaun Westlund, Matthew Hardison, Clinton R. Paden, Duncan MacCannell                                                                                                                                                                                                                                                                                      |
| EPI_ISL_1689187                                                                                                                                                                                                                                                                                                                                                                                                                                                                                                                                                                                                                                                                                                                                                                                                                                                                                                                                                                                                                                                                                                                                                                                                                                                                                                                                                                               |           | Sonora Quest Laboratories                             | TGen North                                                                                | Jolene Bowers, Heather Centner, Chris French, Hayley Yaglom, Ashlyn Pfeiffer, Darrin Lemmer, Dave Engelthaler, The Arizona COVID Genomics Union (ACGU)                                                                                                                                                                                                                                                                                                                                                                                                                                                                                                                                                                  |
| EPI_ISL_1689273, EPI_ISL_1689393, EPI_ISL_1689397, EPI_ISL_1689476, EPI_ISL_1689585, EPI_ISL_1689595, EPI_ISL_1689599, EPI_ISL_1689600, EPI_ISL_1689612, EPI_ISL_1689613, EPI_ISL_1689631, EPI_ISL_1689766, EPI_ISL_1689819, EPI_ISL_1689820, EPI_ISL_1689853, EPI_ISL_1689857, EPI_ISL_1689873, EPI_ISL_1689892, EPI_ISL_1689901, EPI_ISL_1689925, EPI_ISL_1689951, EPI_ISL_1689996, EPI_ISL_1689999, EPI_ISL_1690009, EPI_ISL_1690029, EPI_ISL_1690052, EPI_ISL_1690053, EPI_ISL_1690066, EPI_ISL_1690070, EPI_ISL_1690074, EPI_ISL_1690075, EPI_ISL_1690090, EPI_ISL_1690124, EPI_ISL_1690129, EPI_ISL_1690131, EPI_ISL_1690133, EPI_ISL_1690136, EPI_ISL_1690146, EPI_ISL_1690179, EPI_ISL_1690187, EPI_ISL_1690197                                                                                                                                                                                                                                                                                                                                                                                                                                                                                                                                                                                                                                                                       | see above | Aegis Sciences Corporation                            | Centers for Disease Control and Prevention Division of Viral Diseases, Pathogen Discovery | Dakota Howard, Dhvani Batra, Peter W. Cook, Kara Moser, Adrian Paskey, Jason Caravas, Benjamin Rambo-Martin, Shatavia Morrison, Christopher Gulvick, Scott Sammons, Yvette Unoarumhi, Darlene Wagner, Matthew Schmerer, Cyndi Clark, Patrick Campbell, Rob Case, Vikramsinh Ghorpade, Holly Houdeshell, Ola Kvalvaag, Dillon Nall, Ethan Sanders, Alec Vest, Shaun Westlund, Matthew Hardison, Clinton R. Paden, Duncan MacCannell                                                                                                                                                                                                                                                                                      |
| EPI_ISL_1690295, EPI_ISL_1690309, EPI_ISL_1690344, EPI_ISL_1690381, EPI_ISL_1690406, EPI_ISL_1690626, EPI_ISL_1690690, EPI_ISL_1690757, EPI_ISL_1690814, EPI_ISL_1690947, EPI_ISL_1691288, EPI_ISL_1691326, EPI_ISL_1691358, EPI_ISL_1691391                                                                                                                                                                                                                                                                                                                                                                                                                                                                                                                                                                                                                                                                                                                                                                                                                                                                                                                                                                                                                                                                                                                                                  | see above | Helix/Illumina                                        | Centers for Disease Control and Prevention Division of Viral Diseases, Pathogen Discovery | Dakota Howard, Dhvani Batra, Peter W. Cook, Kara Moser, Adrian Paskey, Jason Caravas, Benjamin Rambo-Martin, Shatavia Morrison, Christopher Gulvick, Scott Sammons, Yvette Unoarumhi, Darlene Wagner, Matthew Schmerer, Eileen de Feo, Jan Antico, Christine Tran, Matthew Tolentino, Shannon Wickline, Kim Gietzen, Brad Sickler, Jingtao Liu, Eric Allen, Phil Febbo, Nicole L. Washington, Simon White, Geraint Levam, Kelly Schiabor Barrett, Elizabeth Cirulli, Alexandre Bolze, Ary Ascencio, Charlotte Rivera-Garcia, Ryan Cho, Jason Nguyen, Sherry Wang, Jimmy Ramirez, Tyler Cassens, Efrén Sandoval, Magnus Isaksson, William Lee, David Becker, Marc Laurent, James Lu, Clinton R. Paden, Duncan MacCannell |
| EPI_ISL_1691428, EPI_ISL_1691492                                                                                                                                                                                                                                                                                                                                                                                                                                                                                                                                                                                                                                                                                                                                                                                                                                                                                                                                                                                                                                                                                                                                                                                                                                                                                                                                                              |           | Quest Diagnostics Incorporated                        | Centers for Disease Control and Prevention Division of Viral Diseases, Pathogen Discovery | Dakota Howard, Dhvani Batra, Peter W. Cook, Kara Moser, Adrian Paskey, Jason Caravas, Benjamin Rambo-Martin, Shatavia Morrison, Christopher Gulvick, Scott Sammons, Yvette Unoarumhi, Darlene Wagner, Matthew Schmerer, S. H. Rosenthal, A. Gerasimova, R. M. Kagan, B. Anderson, M. Hua, Y. Liu, L.E. Bernstein, K.E. Livingston, A. Perez, I. A. Shlyakhter, R. V. Rolando, R. Owen, P. Tanpaiboon, F. Lacbawan, Clinton R. Paden, Duncan MacCannell                                                                                                                                                                                                                                                                  |
| EPI_ISL_1691549, EPI_ISL_1691552, EPI_ISL_1691553, EPI_ISL_1691559, EPI_ISL_1691561, EPI_ISL_1691562, EPI_ISL_1691564, EPI_ISL_1691588, EPI_ISL_1691638, EPI_ISL_1691673, EPI_ISL_1691674, EPI_ISL_1691678, EPI_ISL_1691688, EPI_ISL_1691693, EPI_ISL_1691696, EPI_ISL_1691704, EPI_ISL_1691716, EPI_ISL_1691724, EPI_ISL_1691725, EPI_ISL_1691726, EPI_ISL_1691727, EPI_ISL_1691732, EPI_ISL_1691736, EPI_ISL_1691737, EPI_ISL_1691738, EPI_ISL_1691740, EPI_ISL_1691741, EPI_ISL_1691747, EPI_ISL_1691752, EPI_ISL_1691753, EPI_ISL_1691756, EPI_ISL_1691959, EPI_ISL_1691962, EPI_ISL_1691970, EPI_ISL_1691971, EPI_ISL_1691972, EPI_ISL_1691974, EPI_ISL_1691977, EPI_ISL_1691980, EPI_ISL_1691983, EPI_ISL_1691991, EPI_ISL_1692001, EPI_ISL_1692005, EPI_ISL_1692007, EPI_ISL_1692010, EPI_ISL_1692015, EPI_ISL_1692017, EPI_ISL_1692019, EPI_ISL_1692023, EPI_ISL_1692026, EPI_ISL_1692028, EPI_ISL_1692030, EPI_ISL_1692032, EPI_ISL_1692050, EPI_ISL_1692055, EPI_ISL_1692070, EPI_ISL_1692079, EPI_ISL_1692086, EPI_ISL_1692147, EPI_ISL_1692152, EPI_ISL_1692156, EPI_ISL_1692167, EPI_ISL_1692174, EPI_ISL_1692182, EPI_ISL_1692186, EPI_ISL_1692196, EPI_ISL_1692212, EPI_ISL_1692214, EPI_ISL_1692221, EPI_ISL_1692224, EPI_ISL_1692227, EPI_ISL_1692228, EPI_ISL_1692255, EPI_ISL_1692303, EPI_ISL_1692318, EPI_ISL_1692335, EPI_ISL_1692383, EPI_ISL_1692399, EPI_ISL_1692408 | see above | Infinity Biologix                                     | Centers for Disease Control and Prevention Division of Viral Diseases, Pathogen Discovery | Dakota Howard, Dhvani Batra, Peter W. Cook, Kara Moser, Adrian Paskey, Jason Caravas, Benjamin Rambo-Martin, Shatavia Morrison, Christopher Gulvick, Scott Sammons, Yvette Unoarumhi, Darlene Wagner, Matthew Schmerer, Christian Bixby, Yihe Wang, Jonathan Schultz, Chirayu Goswami, Russ Hager, Robin Grimwood, Clinton R. Paden, Duncan MacCannell                                                                                                                                                                                                                                                                                                                                                                  |
| EPI_ISL_1692496                                                                                                                                                                                                                                                                                                                                                                                                                                                                                                                                                                                                                                                                                                                                                                                                                                                                                                                                                                                                                                                                                                                                                                                                                                                                                                                                                                               |           | Istituto Zooprofilattico Sperimentale del Mezzogiorno | Telethon Institute of Genetics and Medicine (TIGEM)                                       | Antonio Grimaldi Patrizia Annunziata Francesco Panariello Biancamaria Pierri Claudia Tiberio Teresa Giuliano Valentina Bouche Chiara Colantuono Maria Concetta Cuomo Denise Di Concilio Lucio Di Filippo Anna Manfredi Marcello Salvi Antonio Limone Luigi Atripaldi Pellegrino Cerino Andrea Ballabio Davide Cacchiarelli                                                                                                                                                                                                                                                                                                                                                                                              |
| EPI_ISL_1692522                                                                                                                                                                                                                                                                                                                                                                                                                                                                                                                                                                                                                                                                                                                                                                                                                                                                                                                                                                                                                                                                                                                                                                                                                                                                                                                                                                               |           | Infinity Biologix                                     | Centers for Disease Control and Prevention Division of Viral Diseases, Pathogen Discovery | Dakota Howard, Dhvani Batra, Peter W. Cook, Kara Moser, Adrian Paskey, Jason Caravas, Benjamin Rambo-Martin, Shatavia Morrison, Christopher Gulvick, Scott Sammons, Yvette Unoarumhi, Darlene Wagner, Matthew Schmerer, Christian Bixby, Yihe Wang, Jonathan Schultz, Chirayu Goswami, Russ Hager, Robin Grimwood, Clinton R. Paden, Duncan MacCannell                                                                                                                                                                                                                                                                                                                                                                  |
| EPI_ISL_1692526                                                                                                                                                                                                                                                                                                                                                                                                                                                                                                                                                                                                                                                                                                                                                                                                                                                                                                                                                                                                                                                                                                                                                                                                                                                                                                                                                                               |           | Istituto Zooprofilattico Sperimentale del Mezzogiorno | Telethon Institute of Genetics and Medicine (TIGEM)                                       | Antonio Grimaldi Patrizia Annunziata Francesco Panariello Biancamaria Pierri Claudia Tiberio Teresa Giuliano Valentina Bouche Chiara Colantuono Maria Concetta Cuomo Denise Di Concilio Lucio Di Filippo Anna Manfredi Marcello Salvi Antonio Limone Luigi Atripaldi Pellegrino Cerino Andrea Ballabio Davide Cacchiarelli                                                                                                                                                                                                                                                                                                                                                                                              |
| EPI_ISL_1692621                                                                                                                                                                                                                                                                                                                                                                                                                                                                                                                                                                                                                                                                                                                                                                                                                                                                                                                                                                                                                                                                                                                                                                                                                                                                                                                                                                               |           | Infinity Biologix                                     | Centers for Disease Control and Prevention Division of Viral Diseases, Pathogen Discovery | Dakota Howard, Dhvani Batra, Peter W. Cook, Kara Moser, Adrian Paskey, Jason Caravas, Benjamin Rambo-Martin, Shatavia Morrison, Christopher Gulvick, Scott Sammons, Yvette Unoarumhi, Darlene Wagner, Matthew Schmerer, Christian Bixby, Yihe Wang, Jonathan Schultz, Chirayu Goswami, Russ Hager, Robin Grimwood, Clinton R. Paden, Duncan MacCannell                                                                                                                                                                                                                                                                                                                                                                  |
| EPI_ISL_1692676                                                                                                                                                                                                                                                                                                                                                                                                                                                                                                                                                                                                                                                                                                                                                                                                                                                                                                                                                                                                                                                                                                                                                                                                                                                                                                                                                                               |           | Istituto Zooprofilattico Sperimentale del Mezzogiorno | Telethon Institute of Genetics and Medicine (TIGEM)                                       | Antonio Grimaldi Patrizia Annunziata Francesco Panariello Biancamaria Pierri Claudia Tiberio Teresa Giuliano Valentina Bouche Chiara Colantuono Maria Concetta Cuomo Denise Di Concilio Lucio Di Filippo Anna Manfredi Marcello Salvi Antonio Limone Luigi Atripaldi Pellegrino Cerino Andrea Ballabio Davide Cacchiarelli                                                                                                                                                                                                                                                                                                                                                                                              |
| EPI_ISL_1692680                                                                                                                                                                                                                                                                                                                                                                                                                                                                                                                                                                                                                                                                                                                                                                                                                                                                                                                                                                                                                                                                                                                                                                                                                                                                                                                                                                               |           | Infinity Biologix                                     | Centers for Disease Control and Prevention Division of Viral Diseases, Pathogen Discovery | Dakota Howard, Dhvani Batra, Peter W. Cook, Kara Moser, Adrian Paskey, Jason Caravas, Benjamin Rambo-Martin, Shatavia Morrison, Christopher Gulvick, Scott Sammons, Yvette Unoarumhi, Darlene Wagner, Matthew Schmerer, Christian Bixby, Yihe Wang, Jonathan Schultz, Chirayu Goswami, Russ Hager, Robin Grimwood, Clinton R. Paden, Duncan MacCannell                                                                                                                                                                                                                                                                                                                                                                  |
| EPI_ISL_1692684, EPI_ISL_1692720, EPI_ISL_1692837, EPI_ISL_1692871, EPI_ISL_1692906, EPI_ISL_1692965, EPI_ISL_1692982                                                                                                                                                                                                                                                                                                                                                                                                                                                                                                                                                                                                                                                                                                                                                                                                                                                                                                                                                                                                                                                                                                                                                                                                                                                                         |           | Istituto Zooprofilattico Sperimentale del Mezzogiorno | Telethon Institute of Genetics and Medicine (TIGEM)                                       | Antonio Grimaldi Patrizia Annunziata Francesco Panariello Biancamaria Pierri Claudia Tiberio Teresa Giuliano Valentina Bouche Chiara Colantuono Maria Concetta Cuomo Denise Di Concilio Lucio Di Filippo Anna Manfredi Marcello Salvi Antonio Limone Luigi Atripaldi Pellegrino Cerino Andrea Ballabio Davide Cacchiarelli                                                                                                                                                                                                                                                                                                                                                                                              |
| EPI_ISL_1693043, EPI_ISL_1693232, EPI_ISL_1693324, EPI_ISL_1693325, EPI_ISL_1693463, EPI_ISL_1693908, EPI_ISL_1693923, EPI_ISL_1693929, EPI_ISL_1693946, EPI_ISL_1693977, EPI_ISL_1694050, EPI_ISL_1694311, EPI_ISL_1694380, EPI_ISL_1694397, EPI_ISL_1694423, EPI_ISL_1694461, EPI_ISL_1694519, EPI_ISL_1694528                                                                                                                                                                                                                                                                                                                                                                                                                                                                                                                                                                                                                                                                                                                                                                                                                                                                                                                                                                                                                                                                              | see above | Infinity Biologix                                     | Centers for Disease Control and Prevention Division of Viral Diseases, Pathogen Discovery | Dakota Howard, Dhvani Batra, Peter W. Cook, Kara Moser, Adrian Paskey, Jason Caravas, Benjamin Rambo-Martin, Shatavia Morrison, Christopher Gulvick, Scott Sammons, Yvette Unoarumhi, Darlene Wagner, Matthew Schmerer, Christian Bixby, Yihe Wang, Jonathan Schultz, Chirayu Goswami, Russ Hager, Robin Grimwood, Clinton R. Paden, Duncan MacCannell                                                                                                                                                                                                                                                                                                                                                                  |
| EPI_ISL_1694542                                                                                                                                                                                                                                                                                                                                                                                                                                                                                                                                                                                                                                                                                                                                                                                                                                                                                                                                                                                                                                                                                                                                                                                                                                                                                                                                                                               |           | University Hospital for Infectious Diseases           | Croatian Institute of Public Health                                                       | Irena Tabain, Ivana Ferenak                                                                                                                                                                                                                                                                                                                                                                                                                                                                                                                                                                                                                                                                                             |
| EPI_ISL_1694702                                                                                                                                                                                                                                                                                                                                                                                                                                                                                                                                                                                                                                                                                                                                                                                                                                                                                                                                                                                                                                                                                                                                                                                                                                                                                                                                                                               |           | DOHMH Central Harlem                                  | New York City Public Health Laboratory                                                    | Jade Wang, et al.                                                                                                                                                                                                                                                                                                                                                                                                                                                                                                                                                                                                                                                                                                       |
| EPI_ISL_1694706                                                                                                                                                                                                                                                                                                                                                                                                                                                                                                                                                                                                                                                                                                                                                                                                                                                                                                                                                                                                                                                                                                                                                                                                                                                                                                                                                                               |           | DOHMH Chelsea                                         | New York City Public Health Laboratory                                                    | Jade Wang, et al.                                                                                                                                                                                                                                                                                                                                                                                                                                                                                                                                                                                                                                                                                                       |
| EPI_ISL_1694717                                                                                                                                                                                                                                                                                                                                                                                                                                                                                                                                                                                                                                                                                                                                                                                                                                                                                                                                                                                                                                                                                                                                                                                                                                                                                                                                                                               |           | DOHMH Morrisania                                      | New York City Public Health Laboratory                                                    | Jade Wang, et al.                                                                                                                                                                                                                                                                                                                                                                                                                                                                                                                                                                                                                                                                                                       |
| EPI_ISL_1694725                                                                                                                                                                                                                                                                                                                                                                                                                                                                                                                                                                                                                                                                                                                                                                                                                                                                                                                                                                                                                                                                                                                                                                                                                                                                                                                                                                               |           | OCME Office Of Chief Medical Examiner                 | New York City Public Health Laboratory                                                    | Jade Wang, et al.                                                                                                                                                                                                                                                                                                                                                                                                                                                                                                                                                                                                                                                                                                       |

|                                                                    |                                                     |                                                                                                                                            |                                                                                                                                                                                                                                                                                                                                                                                                                                    |
|--------------------------------------------------------------------|-----------------------------------------------------|--------------------------------------------------------------------------------------------------------------------------------------------|------------------------------------------------------------------------------------------------------------------------------------------------------------------------------------------------------------------------------------------------------------------------------------------------------------------------------------------------------------------------------------------------------------------------------------|
| EPI_ISL_1694734                                                    | DOHMH Corona                                        | New York City Public Health Laboratory                                                                                                     | Jade Wang, et al.                                                                                                                                                                                                                                                                                                                                                                                                                  |
| EPI_ISL_1694741, EPI_ISL_1694743                                   | DOHMH PHL                                           | New York City Public Health Laboratory                                                                                                     | Jade Wang, et al.                                                                                                                                                                                                                                                                                                                                                                                                                  |
| EPI_ISL_1694761                                                    | Department of Homeless Services                     | New York City Public Health Laboratory                                                                                                     | Jade Wang, et al.                                                                                                                                                                                                                                                                                                                                                                                                                  |
| EPI_ISL_1694769                                                    | OCME Office Of Chief Medical Examiner               | New York City Public Health Laboratory                                                                                                     | Jade Wang, et al.                                                                                                                                                                                                                                                                                                                                                                                                                  |
| EPI_ISL_1694777, EPI_ISL_1694799, EPI_ISL_1694833, EPI_ISL_1694843 | MEPHI, Aix Marseille University                     | MEPHI, Aix Marseille University                                                                                                            | Anthony LEVASSEUR                                                                                                                                                                                                                                                                                                                                                                                                                  |
| EPI_ISL_1695036                                                    | Fulgent Genetics                                    | Centers for Disease Control and Prevention Division of Viral Diseases, Pathogen Discovery                                                  | Dakota Howard, Dhvani Batra, Peter W. Cook, Kara Moser, Adrian Paskey, Jason Caravas, Benjamin Rambo-Martin, Shatavia Morrison, Christopher Gulvick, Scott Sammons, Yvette Unoarumhi, Darlene Wagner, Matthew Scherer, Harry Gao, Mickey Li, John Gao, Joseph Fierro, Benafsh Sapra, Becky Tsai, Yan Meng, Doreen Ng, James Xie, Clinton R. Paden, Duncan MacCannell                                                               |
| EPI_ISL_1695178                                                    | CHU BORDEAUX                                        | CNR Virus des Infections Respiratoires - France SUD                                                                                        | Antonin Bal, Gregory Destras, Gwendolynne Burfin, Hadrien Regue, Quentin Semanas, Martine Valette, Bruno Lina, Laurence Josset                                                                                                                                                                                                                                                                                                     |
| EPI_ISL_1695253, EPI_ISL_1695256, EPI_ISL_1695265                  | Aegis Sciences Corporation                          | Centers for Disease Control and Prevention Division of Viral Diseases, Pathogen Discovery                                                  | Dakota Howard, Dhvani Batra, Peter W. Cook, Kara Moser, Adrian Paskey, Jason Caravas, Benjamin Rambo-Martin, Shatavia Morrison, Christopher Gulvick, Scott Sammons, Yvette Unoarumhi, Darlene Wagner, Matthew Scherer, Cyndi Clark, Patrick Campbell, Rob Case, Vikramsinha Ghorpade, Holly Houdeshell, Ola Kvalvaag, Dillon Nall, Ethan Sanders, Alec Vest, Shaun Westlund, Matthew Hardison, Clinton R. Paden, Duncan MacCannell |
| EPI_ISL_1695271, EPI_ISL_1695288                                   | CNR Virus des Infections Respiratoires - France SUD | CNR Virus des Infections Respiratoires - France SUD                                                                                        | Antonin Bal, Gregory Destras, Gwendolynne Burfin, Hadrien Regue, Quentin Semanas, Martine Valette, Bruno Lina, Laurence Josset                                                                                                                                                                                                                                                                                                     |
| EPI_ISL_1695296                                                    | Aegis Sciences Corporation                          | Centers for Disease Control and Prevention Division of Viral Diseases, Pathogen Discovery                                                  | Dakota Howard, Dhvani Batra, Peter W. Cook, Kara Moser, Adrian Paskey, Jason Caravas, Benjamin Rambo-Martin, Shatavia Morrison, Christopher Gulvick, Scott Sammons, Yvette Unoarumhi, Darlene Wagner, Matthew Scherer, Cyndi Clark, Patrick Campbell, Rob Case, Vikramsinha Ghorpade, Holly Houdeshell, Ola Kvalvaag, Dillon Nall, Ethan Sanders, Alec Vest, Shaun Westlund, Matthew Hardison, Clinton R. Paden, Duncan MacCannell |
| EPI_ISL_1695307                                                    | CNR Virus des Infections Respiratoires - France SUD | CNR Virus des Infections Respiratoires - France SUD                                                                                        | Antonin Bal, Gregory Destras, Gwendolynne Burfin, Hadrien Regue, Quentin Semanas, Martine Valette, Bruno Lina, Laurence Josset                                                                                                                                                                                                                                                                                                     |
| EPI_ISL_1695317                                                    | Aegis Sciences Corporation                          | Centers for Disease Control and Prevention Division of Viral Diseases, Pathogen Discovery                                                  | Dakota Howard, Dhvani Batra, Peter W. Cook, Kara Moser, Adrian Paskey, Jason Caravas, Benjamin Rambo-Martin, Shatavia Morrison, Christopher Gulvick, Scott Sammons, Yvette Unoarumhi, Darlene Wagner, Matthew Scherer, Cyndi Clark, Patrick Campbell, Rob Case, Vikramsinha Ghorpade, Holly Houdeshell, Ola Kvalvaag, Dillon Nall, Ethan Sanders, Alec Vest, Shaun Westlund, Matthew Hardison, Clinton R. Paden, Duncan MacCannell |
| EPI_ISL_1695328                                                    | CENTRE HOSPITALIER LUCIEN HUSSEL                    | CNR Virus des Infections Respiratoires - France SUD                                                                                        | Antonin Bal, Gregory Destras, Gwendolynne Burfin, Hadrien Regue, Quentin Semanas, Martine Valette, Bruno Lina, Laurence Josset                                                                                                                                                                                                                                                                                                     |
| EPI_ISL_1695359                                                    | CH GIVORS                                           | CNR Virus des Infections Respiratoires - France SUD                                                                                        | Antonin Bal, Gregory Destras, Gwendolynne Burfin, Hadrien Regue, Quentin Semanas, Martine Valette, Bruno Lina, Laurence Josset                                                                                                                                                                                                                                                                                                     |
| EPI_ISL_1695366                                                    | CNR Virus des Infections Respiratoires - France SUD | CNR Virus des Infections Respiratoires - France SUD                                                                                        | Antonin Bal, Gregory Destras, Gwendolynne Burfin, Hadrien Regue, Quentin Semanas, Martine Valette, Bruno Lina, Laurence Josset                                                                                                                                                                                                                                                                                                     |
| EPI_ISL_1695433                                                    | CH TOULON LA SEYNE SUR MER                          | CNR Virus des Infections Respiratoires - France SUD                                                                                        | Antonin Bal, Gregory Destras, Gwendolynne Burfin, Hadrien Regue, Quentin Semanas, Martine Valette, Bruno Lina, Laurence Josset                                                                                                                                                                                                                                                                                                     |
| EPI_ISL_1695456                                                    | CENTRE HOSPITALIER PIERRE OUDOT                     | CNR Virus des Infections Respiratoires - France SUD                                                                                        | Antonin Bal, Gregory Destras, Gwendolynne Burfin, Hadrien Regue, Quentin Semanas, Martine Valette, Bruno Lina, Laurence Josset                                                                                                                                                                                                                                                                                                     |
| EPI_ISL_1695463                                                    | Aegis Sciences Corporation                          | Centers for Disease Control and Prevention Division of Viral Diseases, Pathogen Discovery                                                  | Dakota Howard, Dhvani Batra, Peter W. Cook, Kara Moser, Adrian Paskey, Jason Caravas, Benjamin Rambo-Martin, Shatavia Morrison, Christopher Gulvick, Scott Sammons, Yvette Unoarumhi, Darlene Wagner, Matthew Scherer, Cyndi Clark, Patrick Campbell, Rob Case, Vikramsinha Ghorpade, Holly Houdeshell, Ola Kvalvaag, Dillon Nall, Ethan Sanders, Alec Vest, Shaun Westlund, Matthew Hardison, Clinton R. Paden, Duncan MacCannell |
| EPI_ISL_1695467                                                    | CENTRE HOSPITALIER ST JOSEPH ST LUC                 | CNR Virus des Infections Respiratoires - France SUD                                                                                        | Antonin Bal, Gregory Destras, Gwendolynne Burfin, Hadrien Regue, Quentin Semanas, Martine Valette, Bruno Lina, Laurence Josset                                                                                                                                                                                                                                                                                                     |
| EPI_ISL_1695545                                                    | Aegis Sciences Corporation                          | Centers for Disease Control and Prevention Division of Viral Diseases, Pathogen Discovery                                                  | Dakota Howard, Dhvani Batra, Peter W. Cook, Kara Moser, Adrian Paskey, Jason Caravas, Benjamin Rambo-Martin, Shatavia Morrison, Christopher Gulvick, Scott Sammons, Yvette Unoarumhi, Darlene Wagner, Matthew Scherer, Cyndi Clark, Patrick Campbell, Rob Case, Vikramsinha Ghorpade, Holly Houdeshell, Ola Kvalvaag, Dillon Nall, Ethan Sanders, Alec Vest, Shaun Westlund, Matthew Hardison, Clinton R. Paden, Duncan MacCannell |
| EPI_ISL_1695626                                                    | LAM MAYMAT                                          | CNR Virus des Infections Respiratoires - France SUD                                                                                        | Antonin Bal, Gregory Destras, Gwendolynne Burfin, Hadrien Regue, Quentin Semanas, Martine Valette, Bruno Lina, Laurence Josset                                                                                                                                                                                                                                                                                                     |
| EPI_ISL_1695661, EPI_ISL_1695707                                   | CNR Virus des Infections Respiratoires - France SUD | CNR Virus des Infections Respiratoires - France SUD                                                                                        | Antonin Bal, Gregory Destras, Gwendolynne Burfin, Hadrien Regue, Quentin Semanas, Martine Valette, Bruno Lina, Laurence Josset                                                                                                                                                                                                                                                                                                     |
| EPI_ISL_1695991                                                    | Hôpital Cochin                                      | Department of Virology, Henri Mondor University Hospital, Assistance Publique Hôpitaux de Paris, Université Paris-Est Créteil, INSERM U955 | Christophe Rodriguez, Slim Fourati, Vanessa Demontant, Guillaume Gricourt, Melissa N'Debi, Alexandre Soulier, Elisabeth Trawinski, Jean-Michel Pawlotsky                                                                                                                                                                                                                                                                           |
| EPI_ISL_1696028                                                    | Hôpital Beaujon                                     | Department of Virology, Henri Mondor University Hospital, Assistance Publique Hôpitaux de Paris, Université Paris-Est Créteil, INSERM U955 | Christophe Rodriguez, Slim Fourati, Vanessa Demontant, Guillaume Gricourt, Melissa N'Debi, Alexandre Soulier, Elisabeth Trawinski, Jean-Michel Pawlotsky                                                                                                                                                                                                                                                                           |
| EPI_ISL_1696033, EPI_ISL_1696036, EPI_ISL_1696037                  | E.F.S.B.F.C JEAN MINJOZ                             | Department of Virology, Henri Mondor University Hospital, Assistance Publique Hôpitaux de Paris, Université Paris-Est Créteil, INSERM U955 | Christophe Rodriguez, Slim Fourati, Vanessa Demontant, Guillaume Gricourt, Melissa N'Debi, Alexandre Soulier, Elisabeth Trawinski, Jean-Michel Pawlotsky                                                                                                                                                                                                                                                                           |
| EPI_ISL_1696052                                                    | CH de NEVERS                                        | Department of Virology, Henri Mondor University Hospital, Assistance Publique Hôpitaux de Paris, Université Paris-Est Créteil, INSERM U955 | Christophe Rodriguez, Slim Fourati, Vanessa Demontant, Guillaume Gricourt, Melissa N'Debi, Alexandre Soulier, Elisabeth Trawinski, Jean-Michel Pawlotsky                                                                                                                                                                                                                                                                           |
| EPI_ISL_1696077                                                    | CH Louis Jaillon (Saint-Claude) Laboratoire         | Department of Virology, Henri Mondor University Hospital, Assistance Publique Hôpitaux de Paris, Université Paris-Est Créteil, INSERM U955 | Christophe Rodriguez, Slim Fourati, Vanessa Demontant, Guillaume Gricourt, Melissa N'Debi, Alexandre Soulier, Elisabeth Trawinski, Jean-Michel Pawlotsky                                                                                                                                                                                                                                                                           |
| EPI_ISL_1696094                                                    | Laboratoire LENYS                                   | Department of Virology, Henri Mondor University Hospital, Assistance Publique Hôpitaux de Paris, Université Paris-Est Créteil, INSERM U955 | Christophe Rodriguez, Slim Fourati, Vanessa Demontant, Guillaume Gricourt, Melissa N'Debi, Alexandre Soulier, Elisabeth Trawinski, Jean-Michel Pawlotsky                                                                                                                                                                                                                                                                           |
| EPI_ISL_1696155, EPI_ISL_1696175, EPI_ISL_1696187                  | laboratoire Belle Epine                             | Department of Virology, Henri Mondor University Hospital, Assistance Publique Hôpitaux de Paris, Université Paris-Est Créteil, INSERM U955 | Christophe Rodriguez, Slim Fourati, Vanessa Demontant, Guillaume Gricourt, Melissa N'Debi, Alexandre Soulier, Elisabeth Trawinski, Jean-Michel Pawlotsky                                                                                                                                                                                                                                                                           |
| EPI_ISL_1696194                                                    | CHU NANCY                                           | Department of Virology, Henri Mondor University Hospital, Assistance Publique Hôpitaux de Paris, Université Paris-Est Créteil, INSERM U955 | Christophe Rodriguez, Slim Fourati, Vanessa Demontant, Guillaume Gricourt, Melissa N'Debi, Alexandre Soulier, Elisabeth Trawinski, Jean-Michel Pawlotsky                                                                                                                                                                                                                                                                           |
| EPI_ISL_1696213                                                    | Laboratoire LENYS                                   | Department of Virology, Henri Mondor University Hospital, Assistance Publique Hôpitaux de Paris, Université Paris-Est Créteil, INSERM U955 | Christophe Rodriguez, Slim Fourati, Vanessa Demontant, Guillaume Gricourt, Melissa N'Debi, Alexandre Soulier, Elisabeth Trawinski, Jean-Michel Pawlotsky                                                                                                                                                                                                                                                                           |
| EPI_ISL_1696236                                                    | CH. CHARLES NICOLLE                                 | Department of Virology, Henri Mondor University Hospital, Assistance Publique Hôpitaux de Paris, Université Paris-Est Créteil, INSERM U955 | Christophe Rodriguez, Slim Fourati, Vanessa Demontant, Guillaume Gricourt, Melissa N'Debi, Alexandre Soulier, Elisabeth Trawinski, Jean-Michel Pawlotsky                                                                                                                                                                                                                                                                           |
| EPI_ISL_1697299, EPI_ISL_1697305, EPI_ISL_1697316, EPI_ISL_1697319 | Platform BIS UZA/UAntwerpen                         | Labo Klinische Biologie, UZA                                                                                                               | Jasmine Coppens, Marie Le Mercier, Basil Britto Xavier, Christine Lammens, Veerle Matheussen, Herman Goossens                                                                                                                                                                                                                                                                                                                      |
| EPI_ISL_1697398                                                    | Kansas Health and Environmental Lab                 | Kansas Health and Environmental Lab                                                                                                        | Mike Grose, Jonathan Barnell, Ben Olsen, and Phil Adam                                                                                                                                                                                                                                                                                                                                                                             |
| EPI_ISL_1697435                                                    | Biopstická laborato, s.r.o.                         | Biopstická laborato, s.r.o.                                                                                                                | Petr Šteiner, Tomáš Vanek, Nikola Bílá, Martina Putzová, Michaela Iňová, Silva Vondráková                                                                                                                                                                                                                                                                                                                                          |
| EPI_ISL_1697440, EPI_ISL_1697441                                   | Biopstická laborato s.r.o.                          | Biopstická laborato s.r.o.                                                                                                                 | Petr Šteiner, Tomáš Vanek, Nikola Bílá, Martina Putzová, Michaela Iňová, Silva Vondráková                                                                                                                                                                                                                                                                                                                                          |

|                                                                                                                                                                                                                                                                                |                                                         |                                                                                           |                                                                                                                                                                                                                                                                                                                                                                                                                                                                                                                                                                                                                                                                                                                          |
|--------------------------------------------------------------------------------------------------------------------------------------------------------------------------------------------------------------------------------------------------------------------------------|---------------------------------------------------------|-------------------------------------------------------------------------------------------|--------------------------------------------------------------------------------------------------------------------------------------------------------------------------------------------------------------------------------------------------------------------------------------------------------------------------------------------------------------------------------------------------------------------------------------------------------------------------------------------------------------------------------------------------------------------------------------------------------------------------------------------------------------------------------------------------------------------------|
| EPI_ISL_1697480, EPI_ISL_1697516                                                                                                                                                                                                                                               | Lighthouse Lab in Milton Keynes                         | Wellcome Sanger Institute for the COVID-19 Genomics UK (COG-UK) Consortium                | The Lighthouse Lab in Milton Keynes and Alex Alderton, Roberto Amato, Jeffrey Barrett, Sonia Goncalves, Ewan Harrison, David K. Jackson, Ian Johnston, Dominic Kwiatkowski, Cordelia Langford, John Sillitoe on behalf of the Wellcome Sanger Institute COVID-19 Surveillance Team                                                                                                                                                                                                                                                                                                                                                                                                                                       |
| EPI_ISL_1698630, EPI_ISL_1698677, EPI_ISL_1698685, EPI_ISL_1698718, EPI_ISL_1698736                                                                                                                                                                                            | Lighthouse Lab in Glasgow                               | Wellcome Sanger Institute for the COVID-19 Genomics UK (COG-UK) Consortium                | Harper VanSteenhouse, Yumi Kasai, David Gray, Carol Clugston, Anna Dominiczak and Alex Alderton, Roberto Amato, Jeffrey Barrett, Sonia Goncalves, Ewan Harrison, David K. Jackson, Ian Johnston, Dominic Kwiatkowski, Cordelia Langford, John Sillitoe on behalf of the Wellcome Sanger Institute COVID-19 Surveillance Team                                                                                                                                                                                                                                                                                                                                                                                             |
| EPI_ISL_1699044                                                                                                                                                                                                                                                                | Randox Laboratories                                     | Wellcome Sanger Institute for the COVID-19 Genomics UK (COG-UK) Consortium                | Randox Laboratories and Alex Alderton, Roberto Amato, Jeffrey Barrett, Sonia Goncalves, Ewan Harrison, David K. Jackson, Ian Johnston, Dominic Kwiatkowski, Cordelia Langford, John Sillitoe on behalf of the Wellcome Sanger Institute COVID-19 Surveillance Team                                                                                                                                                                                                                                                                                                                                                                                                                                                       |
| EPI_ISL_1699168                                                                                                                                                                                                                                                                | Lighthouse Lab in Milton Keynes                         | Wellcome Sanger Institute for the COVID-19 Genomics UK (COG-UK) Consortium                | The Lighthouse Lab in Milton Keynes and Alex Alderton, Roberto Amato, Jeffrey Barrett, Sonia Goncalves, Ewan Harrison, David K. Jackson, Ian Johnston, Dominic Kwiatkowski, Cordelia Langford, John Sillitoe on behalf of the Wellcome Sanger Institute COVID-19 Surveillance Team                                                                                                                                                                                                                                                                                                                                                                                                                                       |
| EPI_ISL_1699341, EPI_ISL_1700121, EPI_ISL_1700462                                                                                                                                                                                                                              | Lighthouse Lab in Alderley Park                         | Wellcome Sanger Institute for the COVID-19 Genomics UK (COG-UK) Consortium                | Jacquelyn Wynn, Mairead Hyland, The Lighthouse Lab in Alderley Park and Alex Alderton, Roberto Amato, Jeffrey Barrett, Sonia Goncalves, Ewan Harrison, David K. Jackson, Ian Johnston, Dominic Kwiatkowski, Cordelia Langford, John Sillitoe on behalf of the Wellcome Sanger Institute COVID-19 Surveillance Team                                                                                                                                                                                                                                                                                                                                                                                                       |
| EPI_ISL_1700587                                                                                                                                                                                                                                                                | Research                                                | National Reference Center for Viruses of Respiratory Infections, Institut Pasteur, Paris  | Marion Barbet, Sylvie Behillil, Méline Bizard, Angela Brisebarre, Camille Capel, Vincent Enouf, Louise Lefrançois, Frédéric Lemoine, Christophe Malabat, Corinne Maufrais, Etienne Simon-Lorière, Maud Vanpeene, Sylvie Van der Werf, Marianne Leruez-Ville                                                                                                                                                                                                                                                                                                                                                                                                                                                              |
| EPI_ISL_1700594                                                                                                                                                                                                                                                                | Hospital                                                | National Reference Center for Viruses of Respiratory Infections, Institut Pasteur, Paris  | Marion Barbet, Sylvie Behillil, Méline Bizard, Angela Brisebarre, Camille Capel, Vincent Enouf, Louise Lefrançois, Frédéric Lemoine, Christophe Malabat, Corinne Maufrais, Etienne Simon-Lorière, Maud Vanpeene, Sylvie Van der Werf, Sylvaine Bastian                                                                                                                                                                                                                                                                                                                                                                                                                                                                   |
| EPI_ISL_1700711                                                                                                                                                                                                                                                                | NJDOH, Public Health and Environmental Laboratories     | NJ_PHEL                                                                                   | Lindsey Bodnar, Shiv K. Verma, Jacquelyn Deverell, Matthew Scarnati, Dana Woell, Byeong Jeong                                                                                                                                                                                                                                                                                                                                                                                                                                                                                                                                                                                                                            |
| EPI_ISL_1700728                                                                                                                                                                                                                                                                | Laboratory of Molecular Biology, Diagnostyka sp. z o.o. | genXone SA, Research & Development Laboratory                                             | Maciej Sykulski, Grzegorz Nowicki, Jakub Grabowski, Natalia Drweschka-Matelska, Anna Brylak-Blaszkow, Aleksandra Gidlewicz, Karol Szeszko, Lukasz Krych, Michal Kaszuba                                                                                                                                                                                                                                                                                                                                                                                                                                                                                                                                                  |
| EPI_ISL_1700768                                                                                                                                                                                                                                                                | Kansas Health and Environmental Lab                     | Kansas Health and Environmental Lab                                                       | Mike Grose, Jonathan Barnell, Ben Olsen, and Phil Adam                                                                                                                                                                                                                                                                                                                                                                                                                                                                                                                                                                                                                                                                   |
| EPI_ISL_1700774                                                                                                                                                                                                                                                                | Wichita State University - Molecular Diagnostics Lab    | Kansas Health and Environmental Lab                                                       | Mike Grose, Jonathan Barnell, Ben Olsen, and Phil Adam                                                                                                                                                                                                                                                                                                                                                                                                                                                                                                                                                                                                                                                                   |
| EPI_ISL_1700846                                                                                                                                                                                                                                                                | MD PHL                                                  | MD PHL                                                                                    | Maryland Department of Health Laboratories Administration                                                                                                                                                                                                                                                                                                                                                                                                                                                                                                                                                                                                                                                                |
| EPI_ISL_1701365                                                                                                                                                                                                                                                                | UniversitätsSpital Zürich 009                           | Institute of Medical Virology                                                             | Verena Kufner, Gabriela Ziltener, Maryam Zaheri, Stefan Schmutz, Annette Audigz, Maria Grönberg, Kevin Steiner, Jon Huder, Cyril Shah, Riccarda Capaul, Guido Bloemberg, Jürg Bšni, Michael Huber, Alexandra Trkola                                                                                                                                                                                                                                                                                                                                                                                                                                                                                                      |
| EPI_ISL_1701378                                                                                                                                                                                                                                                                | Spital MŠnedorf AG                                      | Institute of Medical Virology                                                             | Verena Kufner, Gabriela Ziltener, Maryam Zaheri, Stefan Schmutz, Annette Audigz, Maria Grönberg, Kevin Steiner, Jon Huder, Cyril Shah, Riccarda Capaul, Guido Bloemberg, Jürg Bšni, Michael Huber, Alexandra Trkola                                                                                                                                                                                                                                                                                                                                                                                                                                                                                                      |
| EPI_ISL_1701394                                                                                                                                                                                                                                                                | INT Fondazione Pascale                                  | INT Fondazione Pascale                                                                    | INT Fondazione Pascale                                                                                                                                                                                                                                                                                                                                                                                                                                                                                                                                                                                                                                                                                                   |
| EPI_ISL_1701544                                                                                                                                                                                                                                                                | Santa Clara County Public Health Laboratory             | Chan-Zuckerberg Biohub                                                                    | CZB Cliahub Consortium                                                                                                                                                                                                                                                                                                                                                                                                                                                                                                                                                                                                                                                                                                   |
| EPI_ISL_1701697, EPI_ISL_1701699, EPI_ISL_1701716                                                                                                                                                                                                                              | Alaska State Virology Laboratory                        | Alaska State Virology Laboratory                                                          | Stephanie DeRonde, Elva House, Lisa Smith, Ph.D., Jack Chen, Ph.D.                                                                                                                                                                                                                                                                                                                                                                                                                                                                                                                                                                                                                                                       |
| EPI_ISL_1701803                                                                                                                                                                                                                                                                | OHSU Lab Services Molecular Microbiology Lab            | Oregon SARS-CoV-2 Genome Sequencing Center                                                | Brendan L. O'Connell, Sally Grindstaff, Sonia Acharya, Cierra LaBlanc, Kayla Carter, Ruth V. Nichols, Alec J. Hirsch, Donna Hansel, Guang Fan, Xuan Qin, Daniel N. Strelow, William B. Messer, Andrew C. Adey, Benjamin N. Bimber, Brian J. O'Roak                                                                                                                                                                                                                                                                                                                                                                                                                                                                       |
| EPI_ISL_1701836                                                                                                                                                                                                                                                                | Helix/Illumina                                          | Centers for Disease Control and Prevention Division of Viral Diseases, Pathogen Discovery | Dakota Howard, Dhvani Batra, Peter W. Cook, Kara Moser, Adrian Paskey, Jason Caravas, Benjamin Rambo-Martin, Shatavia Morrison, Christopher Gulvick, Scott Sammons, Yvette Unoarumhi, Darlene Wagner, Matthew Schmecher, Eileen de Feo, Jan Antico, Christine Tran, Matthew Tolentino, Shannon Wickline, Kim Gietzen, Brad Sickler, Jingtao Liu, Eric Allen, Phil Febbo, Nicole L. Washington, Simon White, Geraint Levan, Kelly Schiabor Barrett, Elizabeth Cirulli, Alexander Bolze, Ary Ascencio, Charlotte Rivera-Garcia, Ryan Cho, Jason Nguyen, Sherry Wang, Jimmy Ramirez, Tyler Cassens, Efrén Sandoval, Magnus Isaksson, William Lee, David Becker, Marc Laurent, James Lu, Clinton R. Paden, Duncan MacCannell |
| EPI_ISL_1701941, EPI_ISL_1701970, EPI_ISL_1701973, EPI_ISL_1701980, EPI_ISL_1701989, EPI_ISL_1701992, EPI_ISL_1702002, EPI_ISL_1702008, EPI_ISL_1702014, EPI_ISL_1702018, EPI_ISL_1702042, EPI_ISL_1702044, EPI_ISL_1702068, EPI_ISL_1702110, EPI_ISL_1702128, EPI_ISL_1702135 | see above                                               | Aegis Sciences Corporation                                                                | Centers for Disease Control and Prevention Division of Viral Diseases, Pathogen Discovery                                                                                                                                                                                                                                                                                                                                                                                                                                                                                                                                                                                                                                |
| EPI_ISL_1702228, EPI_ISL_1702229, EPI_ISL_1702255, EPI_ISL_1702472, EPI_ISL_1702560, EPI_ISL_1702575                                                                                                                                                                           | Infinity Biologix                                       | Centers for Disease Control and Prevention Division of Viral Diseases, Pathogen Discovery | Dakota Howard, Dhvani Batra, Peter W. Cook, Kara Moser, Adrian Paskey, Jason Caravas, Benjamin Rambo-Martin, Shatavia Morrison, Christopher Gulvick, Scott Sammons, Yvette Unoarumhi, Darlene Wagner, Matthew Schmecher, Christian Bixby, Yife Wang, Jonathan Schultz, Chirayu Goswami, Russ Hager, Robin Grimwood, Clinton R. Paden, Duncan MacCannell                                                                                                                                                                                                                                                                                                                                                                  |
| EPI_ISL_1702609, EPI_ISL_1702617, EPI_ISL_1702649, EPI_ISL_1702655, EPI_ISL_1702662, EPI_ISL_1702670, EPI_ISL_1702683, EPI_ISL_1702692, EPI_ISL_1702694, EPI_ISL_1702703, EPI_ISL_1702704, EPI_ISL_1702718                                                                     | see above                                               | Quest Diagnostics Incorporated                                                            | Centers for Disease Control and Prevention Division of Viral Diseases, Pathogen Discovery                                                                                                                                                                                                                                                                                                                                                                                                                                                                                                                                                                                                                                |
| EPI_ISL_1702783, EPI_ISL_1702792, EPI_ISL_1702830, EPI_ISL_1702842, EPI_ISL_1702884, EPI_ISL_1702885, EPI_ISL_1702887, EPI_ISL_1702888, EPI_ISL_1702970                                                                                                                        | Aegis Sciences Corporation                              | Centers for Disease Control and Prevention Division of Viral Diseases, Pathogen Discovery | Dakota Howard, Dhvani Batra, Peter W. Cook, Kara Moser, Adrian Paskey, Jason Caravas, Benjamin Rambo-Martin, Shatavia Morrison, Christopher Gulvick, Scott Sammons, Yvette Unoarumhi, Darlene Wagner, Matthew Schmecher, Cyndi Clark, Patrick Campbell, Rob Case, Vikramsinha Ghorpade, Holly Houdeshell, Ola Kvalvaag, Dillon Nall, Ethan Sanders, Alec Vest, Shaun Westlund, Matthew Hardison, Clinton R. Paden, Duncan MacCannell                                                                                                                                                                                                                                                                                     |
| EPI_ISL_1703552                                                                                                                                                                                                                                                                | Dutch COVID-19 response team                            | National Institute for Public Health and the Environment (RIVM)                           | Adam Meijer, Harry Vennema, Dirk Eggink, Jeroen Cremer, Sharon van den Brink, Bas van der Veer, AnneMarie van den Brandt, Lisa Wijsman, Kim Frenks, Ryanne Jaarsma, Eunice Then, Jolienke Hardeman, Lynn Aarts, Sanne Bos, Melissa van Tuil, Robert Kohl, Linda van de Nes, Sjoerd Kulling, James Groot, Florian Zwagemaker, Dennis Schmitz, Annelies Kroneman, Karim Hajji, Chantal Reusken, on behalf of the national COVID-19 response team                                                                                                                                                                                                                                                                           |
| EPI_ISL_1703719, EPI_ISL_1703763, EPI_ISL_1703859, EPI_ISL_1703911, EPI_ISL_1703913, EPI_ISL_1703915, EPI_ISL_1703916, EPI_ISL_1703917                                                                                                                                         | ICMR-National Institute of Virology - INSACOG           | NIV Influenza                                                                             | Dr. Varsha Potdar                                                                                                                                                                                                                                                                                                                                                                                                                                                                                                                                                                                                                                                                                                        |
| EPI_ISL_1703919                                                                                                                                                                                                                                                                | Center for Laboratory Medicine                          | Center for Laboratory Medicine                                                            | Yannick Gerth                                                                                                                                                                                                                                                                                                                                                                                                                                                                                                                                                                                                                                                                                                            |
| EPI_ISL_1703928, EPI_ISL_1703930, EPI_ISL_1703931, EPI_ISL_1703933, EPI_ISL_1703934, EPI_ISL_1703935, EPI_ISL_1703937, EPI_ISL_1703938, EPI_ISL_1703943, EPI_ISL_1703948, EPI_ISL_1703956, EPI_ISL_1703960, EPI_ISL_1703963                                                    | see above                                               | ICMR-National Institute of Virology - INSACOG                                             | Dr. Varsha Potdar                                                                                                                                                                                                                                                                                                                                                                                                                                                                                                                                                                                                                                                                                                        |
| EPI_ISL_1704676                                                                                                                                                                                                                                                                | SA Pathology                                            | SA Pathology                                                                              | Lex Leong, Julien Soubrier, Chuan Kok Lim, Song Gao, Mark Turra, Karin Kassahn, Ivan Bastian, Geoff Higgins                                                                                                                                                                                                                                                                                                                                                                                                                                                                                                                                                                                                              |
| EPI_ISL_1704703                                                                                                                                                                                                                                                                | Northwestern Memorial Hospital                          | Northwestern University - Ozer Lab                                                        | Ramon Lorenzo-Redondo, Lacy M. Simons, Taylor J. Dean, Chad J. Achenbach, Lawrence J. Jennings, Chao Qi, Michael G. Ison, Judd F. Hultquist, Egon A. Ozer                                                                                                                                                                                                                                                                                                                                                                                                                                                                                                                                                                |
| EPI_ISL_1704739                                                                                                                                                                                                                                                                | Lurie Children's Hospital of Chicago                    | Northwestern University - Ozer Lab                                                        | Ramon Lorenzo-Redondo, Lacy M. Simons, Taylor J. Dean, Michael G. Ison, Xiaotian, Zheng, William J. Muller, Larry K. Kocielek, Judd F. Hultquist, Egon A. Ozer                                                                                                                                                                                                                                                                                                                                                                                                                                                                                                                                                           |
| EPI_ISL_1704801                                                                                                                                                                                                                                                                | SA Pathology                                            | SA Pathology                                                                              | Lex Leong, Chuan Kok Lim, Mark Turra, Ivan Bastian, Geoff Higgins                                                                                                                                                                                                                                                                                                                                                                                                                                                                                                                                                                                                                                                        |
| EPI_ISL_1704977, EPI_ISL_1705191,                                                                                                                                                                                                                                              | Dutch COVID-19 response team                            | National Institute for Public Health and the Environment                                  | Adam Meijer, Harry Vennema, Dirk Eggink, Jeroen Cremer, Sharon van den Brink, Bas van der Veer, AnneMarie van den Brandt, Lisa Wijsman, Kim                                                                                                                                                                                                                                                                                                                                                                                                                                                                                                                                                                              |





|                                                                                     |                                                                            |                                                                                                                                            |                                                                                                                                                                                                                                                                                                   |
|-------------------------------------------------------------------------------------|----------------------------------------------------------------------------|--------------------------------------------------------------------------------------------------------------------------------------------|---------------------------------------------------------------------------------------------------------------------------------------------------------------------------------------------------------------------------------------------------------------------------------------------------|
|                                                                                     |                                                                            | Caporale"                                                                                                                                  | Pasquale A, Cammà C, Puglia I, Calistri P, Savini G                                                                                                                                                                                                                                               |
| EPI_ISL_1707672                                                                     | SIESP DIPARTIMENTO DI PREVENZIONE TERAMO                                   | Istituto Zooprofilattico Sperimentale dell'Abruzzo e Molise "G. Caporale"                                                                  | Lorusso A, Marcacci M, Di Domenico M, Ancora M, Curini V, Di Lollo Valeria, Mangone I, Rinaldi A, Delli Compagni E, Scialabba S, Caporale M, Di Pasquale A, Cammà C, Puglia I, Calistri P, Savini G                                                                                               |
| EPI_ISL_1707674                                                                     | OSPEDALE SAN SALVATORE - MEDICINA DI LABORATORIO                           | Istituto Zooprofilattico Sperimentale dell'Abruzzo e Molise "G. Caporale"                                                                  | Lorusso A, Marcacci M, Di Domenico M, Ancora M, Curini V, Di Lollo Valeria, Mangone I, Rinaldi A, Delli Compagni E, Scialabba S, Caporale M, Di Pasquale A, Cammà C, Puglia I, Calistri P, Savini G                                                                                               |
| EPI_ISL_1707675                                                                     | Flow Diagnostics Lab                                                       | Los Angeles County PHL                                                                                                                     | P. Hemarajata et al.                                                                                                                                                                                                                                                                              |
| EPI_ISL_1707690                                                                     | Instituto Adolfo Lutz - Regional de Taubate                                | Instituto Adolfo Lutz, Interdisciplinary Procedures Center, Strategic Laboratory                                                           | Claudio Tavares Sacchi, Claudia Regina Gonçalves, Erica Valessa Ramos Gomes, Karoline Rodrigues Campos, Caio Vinicius Dias Lopes, Leonardo Jose Tadeu de Araujo, Katia Correa de Oliveira Santos                                                                                                  |
| EPI_ISL_1707693, EPI_ISL_1707703, EPI_ISL_1707706                                   | Laboratoire LENYS                                                          | Department of Virology, Henri Mondor University Hospital, Assistance Publique Hôpitaux de Paris, Université Paris-Est Créteil, INSERM U955 | Christophe Rodriguez, Slim Fourati, Vanessa Demontant, Guillaume Gricourt, Melissa N'Debi, Alexandre Soulier, Elisabeth Trawinski, Jean-Michel Pawlotsky                                                                                                                                          |
| EPI_ISL_1707724                                                                     | SELAS BC-LAB                                                               | Department of Virology, Henri Mondor University Hospital, Assistance Publique Hôpitaux de Paris, Université Paris-Est Créteil, INSERM U955 | Christophe Rodriguez, Slim Fourati, Vanessa Demontant, Guillaume Gricourt, Melissa N'Debi, Alexandre Soulier, Elisabeth Trawinski, Jean-Michel Pawlotsky                                                                                                                                          |
| EPI_ISL_1707767                                                                     | HOPITAL J. MINJOZ                                                          | Department of Virology, Henri Mondor University Hospital, Assistance Publique Hôpitaux de Paris, Université Paris-Est Créteil, INSERM U955 | Christophe Rodriguez, Slim Fourati, Vanessa Demontant, Guillaume Gricourt, Melissa N'Debi, Alexandre Soulier, Elisabeth Trawinski, Jean-Michel Pawlotsky                                                                                                                                          |
| EPI_ISL_1707777                                                                     | CH. ROBERT DEBRE                                                           | Department of Virology, Henri Mondor University Hospital, Assistance Publique Hôpitaux de Paris, Université Paris-Est Créteil, INSERM U955 | Christophe Rodriguez, Slim Fourati, Vanessa Demontant, Guillaume Gricourt, Melissa N'Debi, Alexandre Soulier, Elisabeth Trawinski, Jean-Michel Pawlotsky                                                                                                                                          |
| EPI_ISL_1707822                                                                     | LBM NEVERS                                                                 | Department of Virology, Henri Mondor University Hospital, Assistance Publique Hôpitaux de Paris, Université Paris-Est Créteil, INSERM U955 | Christophe Rodriguez, Slim Fourati, Vanessa Demontant, Guillaume Gricourt, Melissa N'Debi, Alexandre Soulier, Elisabeth Trawinski, Jean-Michel Pawlotsky                                                                                                                                          |
| EPI_ISL_1707829                                                                     | Laboratoire BioCarmes                                                      | Department of Virology, Henri Mondor University Hospital, Assistance Publique Hôpitaux de Paris, Université Paris-Est Créteil, INSERM U955 | Christophe Rodriguez, Slim Fourati, Vanessa Demontant, Guillaume Gricourt, Melissa N'Debi, Alexandre Soulier, Elisabeth Trawinski, Jean-Michel Pawlotsky                                                                                                                                          |
| EPI_ISL_1707855                                                                     | Hôpital Paul Brousse                                                       | Department of Virology, Henri Mondor University Hospital, Assistance Publique Hôpitaux de Paris, Université Paris-Est Créteil, INSERM U955 | Christophe Rodriguez, Slim Fourati, Vanessa Demontant, Guillaume Gricourt, Melissa N'Debi, Alexandre Soulier, Elisabeth Trawinski, Jean-Michel Pawlotsky                                                                                                                                          |
| EPI_ISL_1707872, EPI_ISL_1707874                                                    | CH. BEGIN                                                                  | Department of Virology, Henri Mondor University Hospital, Assistance Publique Hôpitaux de Paris, Université Paris-Est Créteil, INSERM U955 | Christophe Rodriguez, Slim Fourati, Vanessa Demontant, Guillaume Gricourt, Melissa N'Debi, Alexandre Soulier, Elisabeth Trawinski, Jean-Michel Pawlotsky                                                                                                                                          |
| EPI_ISL_1707879                                                                     | Laboratoire de biologie médicale labo de Fécamp                            | Department of Virology, Henri Mondor University Hospital, Assistance Publique Hôpitaux de Paris, Université Paris-Est Créteil, INSERM U955 | Christophe Rodriguez, Slim Fourati, Vanessa Demontant, Guillaume Gricourt, Melissa N'Debi, Alexandre Soulier, Elisabeth Trawinski, Jean-Michel Pawlotsky                                                                                                                                          |
| EPI_ISL_1707886, EPI_ISL_1707887                                                    | Laboratoire SYNLAB Normandie Maine                                         | Department of Virology, Henri Mondor University Hospital, Assistance Publique Hôpitaux de Paris, Université Paris-Est Créteil, INSERM U955 | Christophe Rodriguez, Slim Fourati, Vanessa Demontant, Guillaume Gricourt, Melissa N'Debi, Alexandre Soulier, Elisabeth Trawinski, Jean-Michel Pawlotsky                                                                                                                                          |
| EPI_ISL_1707896, EPI_ISL_1707899                                                    | Laboratoire BioCarmes                                                      | Department of Virology, Henri Mondor University Hospital, Assistance Publique Hôpitaux de Paris, Université Paris-Est Créteil, INSERM U955 | Christophe Rodriguez, Slim Fourati, Vanessa Demontant, Guillaume Gricourt, Melissa N'Debi, Alexandre Soulier, Elisabeth Trawinski, Jean-Michel Pawlotsky                                                                                                                                          |
| EPI_ISL_1707908                                                                     | CH. FLERS Jacques MONOD                                                    | Department of Virology, Henri Mondor University Hospital, Assistance Publique Hôpitaux de Paris, Université Paris-Est Créteil, INSERM U955 | Christophe Rodriguez, Slim Fourati, Vanessa Demontant, Guillaume Gricourt, Melissa N'Debi, Alexandre Soulier, Elisabeth Trawinski, Jean-Michel Pawlotsky                                                                                                                                          |
| EPI_ISL_1707934                                                                     | Biogroup Bio Lam-LCD Saint-Denis                                           | Department of Virology, Henri Mondor University Hospital, Assistance Publique Hôpitaux de Paris, Université Paris-Est Créteil, INSERM U955 | Christophe Rodriguez, Slim Fourati, Vanessa Demontant, Guillaume Gricourt, Melissa N'Debi, Alexandre Soulier, Elisabeth Trawinski, Jean-Michel Pawlotsky                                                                                                                                          |
| EPI_ISL_1708239, EPI_ISL_1708293, EPI_ISL_1708299, EPI_ISL_1708300                  | Illinois Department of Public Health - Springfield Lab                     | Illinois Department of Public Health - Springfield Lab                                                                                     | Bryan Sim, Gordon McCall                                                                                                                                                                                                                                                                          |
| EPI_ISL_1708465, EPI_ISL_1708467, EPI_ISL_1708468, EPI_ISL_1708469                  | Dr.S.raju Director of public heath and preventive medicine                 | inStem NCBS                                                                                                                                | Uma Ramakrishnan Dasaradhi Palakodeti Aswin SaiNarain                                                                                                                                                                                                                                             |
| EPI_ISL_1708501                                                                     | Dr.S.raju Director of public heath and preventive medicine                 | inStem NCBS                                                                                                                                | Aswin Seshasayee"                                                                                                                                                                                                                                                                                 |
| EPI_ISL_1708551, EPI_ISL_1708559, EPI_ISL_1708563, EPI_ISL_1708570                  | Gundersen Clinical Microbiology Laboratory                                 | Kabara Cancer Research Institute                                                                                                           | Craig S. Richmond, Paraic A. Kenny                                                                                                                                                                                                                                                                |
| EPI_ISL_1714770, EPI_ISL_1714772, EPI_ISL_1714773, EPI_ISL_1714778, EPI_ISL_1714780 | University Hospitals Translational Laboratory (UHTL), University Hospitals | University Hospitals Translational Laboratory (UHTL), University Hospitals                                                                 | Sadri,N., Alouani,D., Song,X.                                                                                                                                                                                                                                                                     |
| EPI_ISL_655653                                                                      | Lighthouse Lab in Alderley Park                                            | Wellcome Sanger Institute for the COVID-19 Genomics UK (COG-UK) Consortium                                                                 | Jacquelyn Wynn, Mairead Hyland, The Lighthouse Lab in Alderley Park and Alex Alderton, Roberto Amato, Sonia Goncalves, Ewan Harrison, David K. Jackson, Ian Johnston, Dominic Kwiatkowski, Cordelia Langford, John Sillitoe on behalf of the Wellcome Sanger Institute COVID-19 Surveillance Team |
| EPI_ISL_656895, EPI_ISL_702126                                                      | Lighthouse Lab in Cambridge                                                | Wellcome Sanger Institute for the COVID-19 Genomics UK (COG-UK) Consortium                                                                 | Rob Howes, The Lighthouse Lab in Cambridge and Alex Alderton, Roberto Amato, Sonia Goncalves, Ewan Harrison, David K. Jackson, Ian Johnston, Dominic Kwiatkowski, Cordelia Langford, John Sillitoe on behalf of the Wellcome Sanger Institute COVID-19 Surveillance Team                          |
| EPI_ISL_703119                                                                      | Lighthouse Lab in Alderley Park                                            | Wellcome Sanger Institute for the COVID-19 Genomics UK (COG-UK) Consortium                                                                 | Jacquelyn Wynn, Mairead Hyland, The Lighthouse Lab in Alderley Park and Alex Alderton, Roberto Amato, Sonia Goncalves, Ewan Harrison, David K. Jackson, Ian Johnston, Dominic Kwiatkowski, Cordelia Langford, John Sillitoe on behalf of the Wellcome Sanger Institute COVID-19 Surveillance Team |
| EPI_ISL_704640                                                                      | Department of Pathology, University of Cambridge                           | COVID-19 Genomics UK (COG-UK) Consortium                                                                                                   | Aminu S. Jahun, Yasmin Chaudhry, Grant Hall, Iliana Georgana, Myra Hosmillo, Martin D. Curran, Malte Pinckert, Surendra Parmar, Ian Goodfellow                                                                                                                                                    |
| EPI_ISL_704996                                                                      | Lighthouse Lab in Cambridge                                                | Wellcome Sanger Institute for the COVID-19 Genomics UK (COG-UK) Consortium                                                                 | Rob Howes, The Lighthouse Lab in Cambridge and Alex Alderton, Roberto Amato, Sonia Goncalves, Ewan Harrison, David K. Jackson, Ian Johnston, Dominic Kwiatkowski, Cordelia Langford, John Sillitoe on behalf of the Wellcome Sanger Institute COVID-19 Surveillance Team                          |
| EPI_ISL_709724                                                                      | Lighthouse Lab in Milton Keynes                                            | Wellcome Sanger Institute for the COVID-19 Genomics UK (COG-UK) Consortium                                                                 | The Lighthouse Lab in Milton Keynes and Alex Alderton, Roberto Amato, Sonia Goncalves, Ewan Harrison, David K. Jackson, Ian Johnston, Dominic Kwiatkowski, Cordelia Langford, John Sillitoe on behalf of the Wellcome Sanger Institute COVID-19 Surveillance Team                                 |
| EPI_ISL_718388                                                                      | Lighthouse Lab in Cambridge                                                | Wellcome Sanger Institute for the COVID-19 Genomics UK (COG-UK) Consortium                                                                 | Rob Howes, The Lighthouse Lab in Cambridge and Alex Alderton, Roberto Amato, Sonia Goncalves, Ewan Harrison, David K. Jackson, Ian Johnston, Dominic Kwiatkowski, Cordelia Langford, John Sillitoe on behalf of the Wellcome Sanger Institute COVID-19 Surveillance Team                          |
| EPI_ISL_718895                                                                      | Lighthouse Lab in Alderley Park                                            | Wellcome Sanger Institute for the COVID-19 Genomics UK (COG-UK) Consortium                                                                 | Jacquelyn Wynn, Mairead Hyland, The Lighthouse Lab in Alderley Park and Alex Alderton, Roberto Amato, Sonia Goncalves, Ewan Harrison, David K. Jackson, Ian Johnston, Dominic Kwiatkowski, Cordelia Langford, John Sillitoe on behalf of the Wellcome Sanger Institute COVID-19 Surveillance Team |

|                                                                |                                                                                                                    |                                                                                                                            |                                                                                                                                                                                                                                                                                                                                                                                                                                                                                                                                                              |
|----------------------------------------------------------------|--------------------------------------------------------------------------------------------------------------------|----------------------------------------------------------------------------------------------------------------------------|--------------------------------------------------------------------------------------------------------------------------------------------------------------------------------------------------------------------------------------------------------------------------------------------------------------------------------------------------------------------------------------------------------------------------------------------------------------------------------------------------------------------------------------------------------------|
| EPI_ISL_718968, EPI_ISL_719063, EPI_ISL_719195, EPI_ISL_719402 | Lighthouse Lab in Cambridge                                                                                        | Wellcome Sanger Institute for the COVID-19 Genomics UK (COG-UK) Consortium                                                 | Rob Howes, The Lighthouse Lab in Cambridge and Alex Alderton, Roberto Amato, Sonia Goncalves, Ewan Harrison, David K. Jackson, Ian Johnston, Dominic Kwiatkowski, Cordelia Langford, John Sillitoe on behalf of the Wellcome Sanger Institute COVID-19 Surveillance Team                                                                                                                                                                                                                                                                                     |
| EPI_ISL_720757                                                 | Lighthouse Lab in Milton Keynes                                                                                    | Wellcome Sanger Institute for the COVID-19 Genomics UK (COG-UK) Consortium                                                 | The Lighthouse Lab in Milton Keynes and Alex Alderton, Roberto Amato, Sonia Goncalves, Ewan Harrison, David K. Jackson, Ian Johnston, Dominic Kwiatkowski, Cordelia Langford, John Sillitoe on behalf of the Wellcome Sanger Institute COVID-19 Surveillance Team                                                                                                                                                                                                                                                                                            |
| EPI_ISL_728189                                                 | National Public Health Laboratory, National Centre for Infectious Diseases                                         | National Public Health Laboratory, National Centre for Infectious Diseases                                                 | Tze Minn Mak, Sophie Octavia, Zhenyang Zhou, Lin Cui, Raymond Tzer Pin Lin                                                                                                                                                                                                                                                                                                                                                                                                                                                                                   |
| EPI_ISL_731680                                                 | Lighthouse Lab in Alderley Park                                                                                    | Wellcome Sanger Institute for the COVID-19 Genomics UK (COG-UK) Consortium                                                 | Jacquelyn Wynn, Mairead Hyland, The Lighthouse Lab in Alderley Park and Alex Alderton, Roberto Amato, Sonia Goncalves, Ewan Harrison, David K. Jackson, Ian Johnston, Dominic Kwiatkowski, Cordelia Langford, John Sillitoe on behalf of the Wellcome Sanger Institute COVID-19 Surveillance Team                                                                                                                                                                                                                                                            |
| EPI_ISL_733744                                                 | Lighthouse Lab in Cambridge                                                                                        | Wellcome Sanger Institute for the COVID-19 Genomics UK (COG-UK) Consortium                                                 | Rob Howes, The Lighthouse Lab in Cambridge and Alex Alderton, Roberto Amato, Sonia Goncalves, Ewan Harrison, David K. Jackson, Ian Johnston, Dominic Kwiatkowski, Cordelia Langford, John Sillitoe on behalf of the Wellcome Sanger Institute COVID-19 Surveillance Team                                                                                                                                                                                                                                                                                     |
| EPI_ISL_735723                                                 | Lighthouse Lab in Milton Keynes                                                                                    | Wellcome Sanger Institute for the COVID-19 Genomics UK (COG-UK) Consortium                                                 | The Lighthouse Lab in Milton Keynes and Alex Alderton, Roberto Amato, Sonia Goncalves, Ewan Harrison, David K. Jackson, Ian Johnston, Dominic Kwiatkowski, Cordelia Langford, John Sillitoe on behalf of the Wellcome Sanger Institute COVID-19 Surveillance Team                                                                                                                                                                                                                                                                                            |
| EPI_ISL_736088                                                 | Lighthouse Lab in Alderley Park                                                                                    | Wellcome Sanger Institute for the COVID-19 Genomics UK (COG-UK) Consortium                                                 | Jacquelyn Wynn, Mairead Hyland, The Lighthouse Lab in Alderley Park and Alex Alderton, Roberto Amato, Sonia Goncalves, Ewan Harrison, David K. Jackson, Ian Johnston, Dominic Kwiatkowski, Cordelia Langford, John Sillitoe on behalf of the Wellcome Sanger Institute COVID-19 Surveillance Team                                                                                                                                                                                                                                                            |
| EPI_ISL_736786                                                 | Istituto Zooprofilattico Sperimentale del Mezzogiorno                                                              | TIGEM                                                                                                                      | Antonio Grimaldi, Patrizia Annunziata, Francesco Panariello, Biancamaria Pierri, Valentina Bouche, Chiara Colantuono, Maria Concetta Cuomo, Denise Di Concilio, Lucio Di Filippo, Anna Manfredi, Marcello Salvi, Antonio Limone, Pellegrino Cerino, Andrea Ballabio, Davide Cacchiarelli.                                                                                                                                                                                                                                                                    |
| EPI_ISL_736891                                                 | Pathogen Genomics Center, National Institute of Infectious Diseases                                                | Pathogen Genomics Center, National Institute of Infectious Diseases                                                        | Tsuyoshi Sekizuka, Kentaro Itokawa, Rina Tanaka, Masanori Hashino, Makoto Kuroda                                                                                                                                                                                                                                                                                                                                                                                                                                                                             |
| EPI_ISL_736996                                                 | Istituto Zooprofilattico Sperimentale del Mezzogiorno                                                              | National Institute for Infectious Diseases, INMI, "L. Spallanzani" IRCCS                                                   | E. Giombini, C.E.M Gruber, F. Messina, M. Rueca, B. Bartolini, F. Carletti, P. Cerino, B. Pierri, C. Buonerba, D. Di Concilio, M.C. Cuomo, A. Di Caro, M.R Capobianchi                                                                                                                                                                                                                                                                                                                                                                                       |
| EPI_ISL_736997                                                 | Istituto Zooprofilattico Sperimentale del Mezzogiorno                                                              | National Institute for Infectious Diseases, INMI, "L. Spallanzani" IRCCS                                                   | F. Messina, C.E.M Gruber, M. Rueca, B. Bartolini, E. Giombini, F. Carletti, P. Cerino, B. Pierri, C. Buonerba, D. Di Concilio, M.C. Cuomo, M.R. Capobianchi, A. Di Caro                                                                                                                                                                                                                                                                                                                                                                                      |
| EPI_ISL_738047                                                 | SIESP CHIETI - DRIVE IN ORTONA                                                                                     | Istituto Zooprofilattico Sperimentale dell'Abruzzo e Molise "G. Caporale"                                                  | Lorusso A, Marcacci M, Di Domenico M, Ancora M, Curini V, Mangone I, Rinaldi A, Di Pasquale A, Cammà C, Puglia I, Savini G                                                                                                                                                                                                                                                                                                                                                                                                                                   |
| EPI_ISL_738093, EPI_ISL_738098, EPI_ISL_738102, EPI_ISL_738109 | Instituto Nacional de Saude (INSA)                                                                                 | Instituto Nacional de Saude (INSA)                                                                                         | Borges et al                                                                                                                                                                                                                                                                                                                                                                                                                                                                                                                                                 |
| EPI_ISL_745192                                                 | Ospedale Di Venere                                                                                                 | Istituto Zooprofilattico Sperimentale della Puglia e della Basilicata                                                      | Parisi A., Capozzi L., Del Sambro L., Bianco A., Chiara M., Pesole G., De Sabato L., Iacobellis M.                                                                                                                                                                                                                                                                                                                                                                                                                                                           |
| EPI_ISL_745197                                                 | Kakatiya Medical College                                                                                           | CSIR-Centre for Cellular and Molecular Biology                                                                             | Dr.V.Sudha Rani,Dr.S.Pavani,Dr.Satyaprasad,Dr.P.Shashikala Reddy,Namami Gaur,Sakshi Shambhavi,Lamuk Zaveri,Shagufta Khan,Nikhil Hajirnis,M Soujanya Reddy,Pratheusa Maccha,Tulasi Nagabandi,Purushotham Vodnala,Blessy B John,Viswagithe S L,B Himasi,Onkar Kulkarni,Payel Mukherjee,Sofia Banu,Priya Singh,Archana Bharadwaj Siva,Karthik Bharadwaj Tallapaka,Rakesh K Mishra,Divya Tej Sowpati                                                                                                                                                             |
| EPI_ISL_751801                                                 | UCSD EXCITE                                                                                                        | Andersen lab at Scripps Research                                                                                           | SEARCH Alliance San Diego                                                                                                                                                                                                                                                                                                                                                                                                                                                                                                                                    |
| EPI_ISL_754236                                                 | Diagnósticos da América - DASA                                                                                     | Instituto de Medicina Tropical Universidade de São Paulo                                                                   | Brazil-UK Centre for Arbovirus Discovery Diagnosis Genomics and Epidemiology (CADDE) Genomic Network - Instituto de Medicina Tropical                                                                                                                                                                                                                                                                                                                                                                                                                        |
| EPI_ISL_754269                                                 | Respiratory Virus Unit, National Infection Service, Public Health England                                          | COVID-19 Genomics UK (COG-UK) Consortium                                                                                   | PHE Covid Sequencing Team                                                                                                                                                                                                                                                                                                                                                                                                                                                                                                                                    |
| EPI_ISL_755593                                                 | Helix/Illumina                                                                                                     | Genomics and Discovery, Respiratory Viruses Branch, Division of Viral Diseases, Centers for Disease Control and Prevention | Peter W. Cook, Dhvani Batra, Eileen de Feo, Jan Antico, Christine Tran, Matthew Tolentino, Shannon Wickline, Kim Gietzen, Brad Sickler, Jingtao Liu, Eric Allen, Phil Febbo, Summer Galloway, Nicole L. Washington, Simon White, Geraint Levan, Kelly Schiabor Barrett, Elizabeth Cirulli, Alexandre Bolze, Ary Ascencio, Charlotte Rivera-Garcia, Ryan Cho, Jason Nguyen, Sherry Wang, Jimmy Ramirez, Thyer Cassens, Efrén Sandoval, Magnus Isaksson, William Lee, David Becker, Marc Laurent, James Lu, Clinton R. Paden, Suixiang Tong, Duncan MacCannell |
| EPI_ISL_756364, EPI_ISL_756365                                 | The Caribbean Public Health Agency                                                                                 | Carrington Lab, Department of PreClinical Sciences, Faculty of Medical Sciences, The University of the West Indies         | Nikita S. D. Sahadeo, Gabriel Escobar, Sarah Hill, Vernie Ramkissoon, Risha Singh, SueMin Nathaniel, Jacqueline Bissor-McKenzie, Arianne Brown-Jordan, Naresh Nandram, Avery Hinds, Jerome Foster, Stanley Giddings, Karla Georges, Marsha Ivey, Rahul Naidu, , Rajini Haraksingh, Jaya Jayaraman, Chhinna Chinnadurai, Adesh Ramsubhag, Nuno Faria, Oliver Pybus, Christopher Oura, Christine V. F. Carrington                                                                                                                                              |
| EPI_ISL_756367                                                 | The Caribbean Public Health Agency                                                                                 | Carrington Lab, Department of PreClinical Sciences, Faculty of Medical Sciences, The University of the West Indies         | Nikita S. D. Sahadeo, Gabriel Escobar, Sarah Hill, Vernie Ramkissoon, Risha Singh, SueMin Nathaniel, Jacqueline Bissor-McKenzie, Arianne Brown-Jordan, Naresh Nandram, Avery Hinds, Jerome Foster, Stanley Giddings, Karla Georges, Marsha Ivey, Rahul Naidu, , Rajini Haraksingh, Jaya Jayaraman, Chhinna Chinnadurai, Adesh Ramsubhag, Nuno Faria, Oliver Pybus, Christopher Oura, Christine V. F. Carrington                                                                                                                                              |
| EPI_ISL_756368                                                 | The Caribbean Public Health Agency                                                                                 | Carrington Lab, Department of PreClinical Sciences, Faculty of Medical Sciences, The University of the West Indies         | Nikita S. D. Sahadeo, Gabriel Escobar, Sarah Hill, Vernie Ramkissoon, Risha Singh, SueMin Nathaniel, Jacqueline Bissor-McKenzie, Arianne Brown-Jordan, Naresh Nandram, Avery Hinds, Jerome Foster, Stanley Giddings, Karla Georges, Marsha Ivey, Rahul Naidu, , Rajini Haraksingh, Jaya Jayaraman, Chhinna Chinnadurai, Adesh Ramsubhag, Nuno Faria, Oliver Pybus, Christopher Oura, Christine V. F. Carrington                                                                                                                                              |
| EPI_ISL_756424                                                 | Lighthouse Lab in Cambridge                                                                                        | Wellcome Sanger Institute for the COVID-19 Genomics UK (COG-UK) Consortium                                                 | Rob Howes, The Lighthouse Lab in Cambridge and Alex Alderton, Roberto Amato, Sonia Goncalves, Ewan Harrison, David K. Jackson, Ian Johnston, Dominic Kwiatkowski, Cordelia Langford, John Sillitoe on behalf of the Wellcome Sanger Institute COVID-19 Surveillance Team                                                                                                                                                                                                                                                                                     |
| EPI_ISL_756945                                                 | Lighthouse Lab in Milton Keynes                                                                                    | Wellcome Sanger Institute for the COVID-19 Genomics UK (COG-UK) Consortium                                                 | The Lighthouse Lab in Milton Keynes and Alex Alderton, Roberto Amato, Sonia Goncalves, Ewan Harrison, David K. Jackson, Ian Johnston, Dominic Kwiatkowski, Cordelia Langford, John Sillitoe on behalf of the Wellcome Sanger Institute COVID-19 Surveillance Team                                                                                                                                                                                                                                                                                            |
| EPI_ISL_757285, EPI_ISL_757286                                 | Department of Virology, Public Health Laboratories Division                                                        | Department of Virology, Public Health Laboratories Division                                                                | Massab Umair, Aamer Ikram, Muhammad Salman                                                                                                                                                                                                                                                                                                                                                                                                                                                                                                                   |
| EPI_ISL_759708, EPI_ISL_759761                                 | Instituto Nacional de Saude (INSA)                                                                                 | Instituto Nacional de Saude (INSA)                                                                                         | Borges et al                                                                                                                                                                                                                                                                                                                                                                                                                                                                                                                                                 |
| EPI_ISL_759896                                                 | Queen Elizabeth Hospital                                                                                           | Hong Kong Department of Health                                                                                             | Alan K.L. Tsang, Peter C.W. Yip, Edman T.K. Lam, Rickjason C.W. Chan, Dominic N.C. Tsang                                                                                                                                                                                                                                                                                                                                                                                                                                                                     |
| EPI_ISL_760756                                                 | Lighthouse Lab in Alderley Park                                                                                    | Wellcome Sanger Institute for the COVID-19 Genomics UK (COG-UK) Consortium                                                 | Jacquelyn Wynn, Mairead Hyland, The Lighthouse Lab in Alderley Park and Alex Alderton, Roberto Amato, Sonia Goncalves, Ewan Harrison, David K. Jackson, Ian Johnston, Dominic Kwiatkowski, Cordelia Langford, John Sillitoe on behalf of the Wellcome Sanger Institute COVID-19 Surveillance Team                                                                                                                                                                                                                                                            |
| EPI_ISL_761449, EPI_ISL_761530, EPI_ISL_762307, EPI_ISL_762378 | Lighthouse Lab in Milton Keynes                                                                                    | Wellcome Sanger Institute for the COVID-19 Genomics UK (COG-UK) Consortium                                                 | The Lighthouse Lab in Milton Keynes and Alex Alderton, Roberto Amato, Sonia Goncalves, Ewan Harrison, David K. Jackson, Ian Johnston, Dominic Kwiatkowski, Cordelia Langford, John Sillitoe on behalf of the Wellcome Sanger Institute COVID-19 Surveillance Team                                                                                                                                                                                                                                                                                            |
| EPI_ISL_763858                                                 | Queens Medical Centre, Clinical Microbiology Department / DeepSeq Nottingham                                       | COVID-19 Genomics UK (COG-UK) Consortium                                                                                   | Gemma Clark, Wendy Smith, Manjinder Khakh, Vicki M Fleming, Michelle M Lister, Hannah Howson-Wells, Jonathan Ball, Patrick McClure, Joseph Chappell, Theocharis Tsoleiridis, Nadine Holmes, Matthew Carlisle, Christopher Moore, Fei Sang, Johnny Debebe, Victoria Wright, Matthew Loose                                                                                                                                                                                                                                                                     |
| EPI_ISL_763959                                                 | Oxford Viroomics, NDM, University of Oxford; Oxford University Hospitals; Basingstoke and North Hampshire Hospital | COVID-19 Genomics UK (COG-UK) Consortium                                                                                   | Tanya Golubchik, David Bonsall, George Mackintyre, Amy Trebes, Mariateresa de Cesare, Catrin Moore, Alex Mobbs, Anita Justice, Robert Shaw, Monique Andersson, Timothy Peto, Emma Wise, Nathan Moore, Jessica Lynch, Nick Cortes, Matilde Mori, Stephen Kidd, David Buck, John Todd, Christophe Fraser                                                                                                                                                                                                                                                       |
| EPI_ISL_766569                                                 | Oman-National Influenza Center                                                                                     | Oman-National Influenza Center                                                                                             | Samiha Al-Kharusi, Laila Al-Balushi, Hamida Al-Barwani, Aisha Al-Busaidi, Intisar Al-Shukri, Samira Al-Mahruqi, Hanan Al-Kindi, Amina Al-Jardani                                                                                                                                                                                                                                                                                                                                                                                                             |
| EPI_ISL_766580, EPI_ISL_766581                                 | ULSS 2 Treviso                                                                                                     | Istituto Zooprofilattico Sperimentale delle Venezie                                                                        | Adelaide Milani, Alessia Schivo, Annalisa Salviato, Erika Giorgia Quaranta, Ambra Pastori, Bianca Zecchin, Alice Fusaro, Isabella Monne, Calogero Terregino, Antonia Ricci                                                                                                                                                                                                                                                                                                                                                                                   |
| EPI_ISL_767013                                                 | University of Bari Biomedical Sciences and Human Oncology                                                          | University of Bari Biomedical Sciences and Human Oncology                                                                  | Maria Chironna, Anna Sallustio, Daniela Loconsole, Marisa Accogli                                                                                                                                                                                                                                                                                                                                                                                                                                                                                            |
| EPI_ISL_767594                                                 | SARATOGA HOSPITAL LABORATORY                                                                                       | Wadsworth Center, New York State Department of Health                                                                      | Kirsten St. George, Daryl M. Lamson, Alexis Russel, Matthew Shudt, Melissa A Leisner, Jonathan Plitnick, Navjot Singh, John Kelly, Sara Griesemer, Erasmus Schneider, Erica Lasek-Nesselquist                                                                                                                                                                                                                                                                                                                                                                |
| EPI_ISL_768708                                                 | Pathogen Genomics Center, National Institute of Infectious                                                         | Pathogen Genomics Center, National Institute of Infectious                                                                 | Tsuyoshi Sekizuka, Kentaro Itokawa, Rina Tanaka, Masanori Hashino, Makoto Kuroda                                                                                                                                                                                                                                                                                                                                                                                                                                                                             |

|                                                                                | Diseases                                                                                                                                                                                   | Diseases                                                                      |                                                                                                                                                                                                                                                                                                                                                                                                                                                                                                                                                                                                        |
|--------------------------------------------------------------------------------|--------------------------------------------------------------------------------------------------------------------------------------------------------------------------------------------|-------------------------------------------------------------------------------|--------------------------------------------------------------------------------------------------------------------------------------------------------------------------------------------------------------------------------------------------------------------------------------------------------------------------------------------------------------------------------------------------------------------------------------------------------------------------------------------------------------------------------------------------------------------------------------------------------|
| EPI_ISL_768944, EPI_ISL_769024, EPI_ISL_769109, EPI_ISL_769131                 | Lighthouse Lab in Cambridge                                                                                                                                                                | Wellcome Sanger Institute for the COVID-19 Genomics UK (COG-UK) Consortium    | Rob Howes, The Lighthouse Lab in Cambridge and Alex Alderton, Roberto Amato, Sonia Goncalves, Ewan Harrison, David K. Jackson, Ian Johnston, Dominic Kwiatkowski, Cordelia Langford, John Sillitoe on behalf of the Wellcome Sanger Institute COVID-19 Surveillance Team                                                                                                                                                                                                                                                                                                                               |
| EPI_ISL_769554, EPI_ISL_769726, EPI_ISL_769770                                 | Lighthouse Lab in Milton Keynes                                                                                                                                                            | Wellcome Sanger Institute for the COVID-19 Genomics UK (COG-UK) Consortium    | The Lighthouse Lab in Milton Keynes and Alex Alderton, Roberto Amato, Sonia Goncalves, Ewan Harrison, David K. Jackson, Ian Johnston, Dominic Kwiatkowski, Cordelia Langford, John Sillitoe on behalf of the Wellcome Sanger Institute COVID-19 Surveillance Team                                                                                                                                                                                                                                                                                                                                      |
| EPI_ISL_771367                                                                 | SA Pathology                                                                                                                                                                               | SA Pathology                                                                  | Lex Leong, Julien Soubrier, Chuan Kok Lim, Song Gao, Mark Turra, Karin Kassahn, Ivan Bastian, Geoff Higgins                                                                                                                                                                                                                                                                                                                                                                                                                                                                                            |
| EPI_ISL_777026, EPI_ISL_777143, EPI_ISL_777315, EPI_ISL_777451                 | Lighthouse Lab in Alderley Park                                                                                                                                                            | Wellcome Sanger Institute for the COVID-19 Genomics UK (COG-UK) Consortium    | Jacquelyn Wynn, Mairead Hyland, The Lighthouse Lab in Alderley Park and Alex Alderton, Roberto Amato, Sonia Goncalves, Ewan Harrison, David K. Jackson, Ian Johnston, Dominic Kwiatkowski, Cordelia Langford, John Sillitoe on behalf of the Wellcome Sanger Institute COVID-19 Surveillance Team                                                                                                                                                                                                                                                                                                      |
| EPI_ISL_777977, EPI_ISL_778110                                                 | Lighthouse Lab in Cambridge                                                                                                                                                                | Wellcome Sanger Institute for the COVID-19 Genomics UK (COG-UK) Consortium    | Rob Howes, The Lighthouse Lab in Cambridge and Alex Alderton, Roberto Amato, Sonia Goncalves, Ewan Harrison, David K. Jackson, Ian Johnston, Dominic Kwiatkowski, Cordelia Langford, John Sillitoe on behalf of the Wellcome Sanger Institute COVID-19 Surveillance Team                                                                                                                                                                                                                                                                                                                               |
| EPI_ISL_778869                                                                 | Virology Lab, Ospedali Riuniti, Ancona                                                                                                                                                     | Dipartimento di Scienze Biomediche e Cliniche, L. Sacco, Università di Milano | Alessia Lai, Annalisa Bergna, Gianni Zehender, Claudia Balotta, Sara Caucci, Laura Di Sante, Roberta Longo, Sofia Maria Luigia Tiano, Massimo Galli, Patrizia Bagnarelli, Stefano Menzo                                                                                                                                                                                                                                                                                                                                                                                                                |
| EPI_ISL_779153, EPI_ISL_779154                                                 | Yale Pathology Lab                                                                                                                                                                         | Grubaugh Lab - Yale School of Public Health                                   | Tara Alpert, Joseph Fauver, Chen Liu, Pei Hui, Jianhui Wang, Susan Bell and Han Zhou, Anderson Brito, Mallery Breban, Anne Wylie, Chantal Vogels, Mary Petrone, Chaney Kalinich, Isabel Ott, Arnau Casanovas, Catherine Muenker, Adam Moore, Alice Lu, Maria Tokuyama, Patrick Wong, Peiwen Lu, Saad Omer, Richard Martinello, Allison Nelson, Shelli Farhadian, Akiko Iwasaki, Charlese Dela Cruz, Albert Ko, Nathan Grubaugh                                                                                                                                                                         |
| EPI_ISL_779657                                                                 | Institute of Virology, Biomedical Research Center of the Slovak Academy of Sciences, Bratislava                                                                                            | Faculty of Natural Sciences, Comenius University, Bratislava                  | Broa Brejová, Viktória abanová, Kristína Bořšová, Viktória Hodorová, Sabina Fumaová Havlíková, Juraj Kopáček, Martina Liková, ubomira Lukáiková, Martina Neboháová, Monika Sláviková, Andrej Belák, Tomáš Vina, Jozef Nosek, Boris Klempa                                                                                                                                                                                                                                                                                                                                                              |
| EPI_ISL_779731                                                                 | Servicio de Microbiología, Laboratori Clínic Metropolitana Nord, Hospital Universitari Germans Trias i Pujol, Institut d'Investigació en Ciències de la Salut Germans Trias i Pujol (IGTP) | SeqCOVID-SPAIN consortium/IBV(CSIC)                                           | Elisa Martró, Antoni E. Bordoy, Anna Not, Adrián Antuori, Anabel Fernández, Nona Romani, Verónica Saludes, Cristina Casañ and SeqCOVID-SPAIN consortium                                                                                                                                                                                                                                                                                                                                                                                                                                                |
| EPI_ISL_781615                                                                 | Lighthouse Lab in Milton Keynes                                                                                                                                                            | Wellcome Sanger Institute for the COVID-19 Genomics UK (COG-UK) Consortium    | The Lighthouse Lab in Milton Keynes and Alex Alderton, Roberto Amato, Sonia Goncalves, Ewan Harrison, David K. Jackson, Ian Johnston, Dominic Kwiatkowski, Cordelia Langford, John Sillitoe on behalf of the Wellcome Sanger Institute COVID-19 Surveillance Team                                                                                                                                                                                                                                                                                                                                      |
| EPI_ISL_781662, EPI_ISL_781714                                                 | Lighthouse Lab in Cambridge                                                                                                                                                                | Wellcome Sanger Institute for the COVID-19 Genomics UK (COG-UK) Consortium    | Rob Howes, The Lighthouse Lab in Cambridge and Alex Alderton, Roberto Amato, Sonia Goncalves, Ewan Harrison, David K. Jackson, Ian Johnston, Dominic Kwiatkowski, Cordelia Langford, John Sillitoe on behalf of the Wellcome Sanger Institute COVID-19 Surveillance Team                                                                                                                                                                                                                                                                                                                               |
| EPI_ISL_782109                                                                 | Lighthouse Lab in Alderley Park                                                                                                                                                            | Wellcome Sanger Institute for the COVID-19 Genomics UK (COG-UK) Consortium    | Jacquelyn Wynn, Mairead Hyland, The Lighthouse Lab in Alderley Park and Alex Alderton, Roberto Amato, Sonia Goncalves, Ewan Harrison, David K. Jackson, Ian Johnston, Dominic Kwiatkowski, Cordelia Langford, John Sillitoe on behalf of the Wellcome Sanger Institute COVID-19 Surveillance Team                                                                                                                                                                                                                                                                                                      |
| EPI_ISL_782367, EPI_ISL_782463                                                 | Lighthouse Lab in Glasgow                                                                                                                                                                  | Wellcome Sanger Institute for the COVID-19 Genomics UK (COG-UK) Consortium    | Harper VanSteenhouse, Yumi Kasai, David Gray, Carol Clugston, Anna Dominiczak and Alex Alderton, Roberto Amato, Sonia Goncalves, Ewan Harrison, David K. Jackson, Ian Johnston, Dominic Kwiatkowski, Cordelia Langford, John Sillitoe on behalf of the Wellcome Sanger Institute COVID-19 Surveillance Team                                                                                                                                                                                                                                                                                            |
| EPI_ISL_782821                                                                 | Lighthouse Lab in Milton Keynes                                                                                                                                                            | Wellcome Sanger Institute for the COVID-19 Genomics UK (COG-UK) Consortium    | The Lighthouse Lab in Milton Keynes and Alex Alderton, Roberto Amato, Sonia Goncalves, Ewan Harrison, David K. Jackson, Ian Johnston, Dominic Kwiatkowski, Cordelia Langford, John Sillitoe on behalf of the Wellcome Sanger Institute COVID-19 Surveillance Team                                                                                                                                                                                                                                                                                                                                      |
| EPI_ISL_782843                                                                 | Lighthouse Lab in Alderley Park                                                                                                                                                            | Wellcome Sanger Institute for the COVID-19 Genomics UK (COG-UK) Consortium    | Jacquelyn Wynn, Mairead Hyland, The Lighthouse Lab in Alderley Park and Alex Alderton, Roberto Amato, Sonia Goncalves, Ewan Harrison, David K. Jackson, Ian Johnston, Dominic Kwiatkowski, Cordelia Langford, John Sillitoe on behalf of the Wellcome Sanger Institute COVID-19 Surveillance Team                                                                                                                                                                                                                                                                                                      |
| EPI_ISL_783317                                                                 | Lighthouse Lab in Milton Keynes                                                                                                                                                            | Wellcome Sanger Institute for the COVID-19 Genomics UK (COG-UK) Consortium    | The Lighthouse Lab in Milton Keynes and Alex Alderton, Roberto Amato, Sonia Goncalves, Ewan Harrison, David K. Jackson, Ian Johnston, Dominic Kwiatkowski, Cordelia Langford, John Sillitoe on behalf of the Wellcome Sanger Institute COVID-19 Surveillance Team                                                                                                                                                                                                                                                                                                                                      |
| EPI_ISL_794619                                                                 | LabPLUS                                                                                                                                                                                    | Institute of Environmental Science and Research (ESR)                         | Xiaoyun Ren, Matt Storey, Nikki Freed, Muhammad Faisal, Jing Wang, Hermes Perez, Anja Werno, Antje van der Linden, Arto Upton, Chris Mansell, David Hammer, Dragana Drinkovic, Gary McAuliffe, Hana Sofia Andersson, James Ussher, Jill Sherwood, Josh Freeman, Julia Howard, Juliet Elvy, Mary DeAlmeida, Matt Blakiston, Matthew Rogers, Max Bloomfield, Michael Addide, Michelle Balm, Sally Roberts, Sarah Jefferies, Sharmini Muttayyah, Susan Morpeth, Susan Taylor, Timothy Blackmore, Vani Sathyendran, Veronica Playle, Virginia Hope, Erasmus Smit, Lauren Jelly, Olin Slinder, Joep de Ligt |
| EPI_ISL_794747                                                                 | Ospedale Vito Fazzi                                                                                                                                                                        | Istituto Zooprofilattico Sperimentale della Puglia e della Basilicata         | Parisi A., Bianco A., Capozzi L., Del Sambro L., Manzulli V., Rondinone V., Pace L., Cipolletta D., Galante D.                                                                                                                                                                                                                                                                                                                                                                                                                                                                                         |
| EPI_ISL_796739, EPI_ISL_796741, EPI_ISL_796752, EPI_ISL_796757, EPI_ISL_796761 | Instituto Nacional de Saude (INSA)                                                                                                                                                         | Instituto Nacional de Saude (INSA)                                            | Borges et al                                                                                                                                                                                                                                                                                                                                                                                                                                                                                                                                                                                           |
| EPI_ISL_797012                                                                 | Lighthouse Lab in Alderley Park                                                                                                                                                            | Wellcome Sanger Institute for the COVID-19 Genomics UK (COG-UK) Consortium    | Jacquelyn Wynn, Mairead Hyland, The Lighthouse Lab in Alderley Park and Alex Alderton, Roberto Amato, Sonia Goncalves, Ewan Harrison, David K. Jackson, Ian Johnston, Dominic Kwiatkowski, Cordelia Langford, John Sillitoe on behalf of the Wellcome Sanger Institute COVID-19 Surveillance Team                                                                                                                                                                                                                                                                                                      |
| EPI_ISL_797486                                                                 | Lighthouse Lab in Cambridge                                                                                                                                                                | Wellcome Sanger Institute for the COVID-19 Genomics UK (COG-UK) Consortium    | Rob Howes, The Lighthouse Lab in Cambridge and Alex Alderton, Roberto Amato, Sonia Goncalves, Ewan Harrison, David K. Jackson, Ian Johnston, Dominic Kwiatkowski, Cordelia Langford, John Sillitoe on behalf of the Wellcome Sanger Institute COVID-19 Surveillance Team                                                                                                                                                                                                                                                                                                                               |
| EPI_ISL_797504                                                                 | Lighthouse Lab in Alderley Park                                                                                                                                                            | Wellcome Sanger Institute for the COVID-19 Genomics UK (COG-UK) Consortium    | Jacquelyn Wynn, Mairead Hyland, The Lighthouse Lab in Alderley Park and Alex Alderton, Roberto Amato, Sonia Goncalves, Ewan Harrison, David K. Jackson, Ian Johnston, Dominic Kwiatkowski, Cordelia Langford, John Sillitoe on behalf of the Wellcome Sanger Institute COVID-19 Surveillance Team                                                                                                                                                                                                                                                                                                      |
| EPI_ISL_797565                                                                 | Lighthouse Lab in Cambridge                                                                                                                                                                | Wellcome Sanger Institute for the COVID-19 Genomics UK (COG-UK) Consortium    | Rob Howes, The Lighthouse Lab in Cambridge and Alex Alderton, Roberto Amato, Sonia Goncalves, Ewan Harrison, David K. Jackson, Ian Johnston, Dominic Kwiatkowski, Cordelia Langford, John Sillitoe on behalf of the Wellcome Sanger Institute COVID-19 Surveillance Team                                                                                                                                                                                                                                                                                                                               |
| EPI_ISL_797766                                                                 | Lighthouse Lab in Glasgow                                                                                                                                                                  | Wellcome Sanger Institute for the COVID-19 Genomics UK (COG-UK) Consortium    | Harper VanSteenhouse, Yumi Kasai, David Gray, Carol Clugston, Anna Dominiczak and Alex Alderton, Roberto Amato, Sonia Goncalves, Ewan Harrison, David K. Jackson, Ian Johnston, Dominic Kwiatkowski, Cordelia Langford, John Sillitoe on behalf of the Wellcome Sanger Institute COVID-19 Surveillance Team                                                                                                                                                                                                                                                                                            |
| EPI_ISL_798611, EPI_ISL_798629                                                 | Lighthouse Lab in Milton Keynes                                                                                                                                                            | Wellcome Sanger Institute for the COVID-19 Genomics UK (COG-UK) Consortium    | The Lighthouse Lab in Milton Keynes and Alex Alderton, Roberto Amato, Sonia Goncalves, Ewan Harrison, David K. Jackson, Ian Johnston, Dominic Kwiatkowski, Cordelia Langford, John Sillitoe on behalf of the Wellcome Sanger Institute COVID-19 Surveillance Team                                                                                                                                                                                                                                                                                                                                      |
| EPI_ISL_798678                                                                 | Lighthouse Lab in Cambridge                                                                                                                                                                | Wellcome Sanger Institute for the COVID-19 Genomics UK (COG-UK) Consortium    | Rob Howes, The Lighthouse Lab in Cambridge and Alex Alderton, Roberto Amato, Sonia Goncalves, Ewan Harrison, David K. Jackson, Ian Johnston, Dominic Kwiatkowski, Cordelia Langford, John Sillitoe on behalf of the Wellcome Sanger Institute COVID-19 Surveillance Team                                                                                                                                                                                                                                                                                                                               |
| EPI_ISL_798693                                                                 | Lighthouse Lab in Milton Keynes                                                                                                                                                            | Wellcome Sanger Institute for the COVID-19 Genomics UK (COG-UK) Consortium    | The Lighthouse Lab in Milton Keynes and Alex Alderton, Roberto Amato, Sonia Goncalves, Ewan Harrison, David K. Jackson, Ian Johnston, Dominic Kwiatkowski, Cordelia Langford, John Sillitoe on behalf of the Wellcome Sanger Institute COVID-19 Surveillance Team                                                                                                                                                                                                                                                                                                                                      |
| EPI_ISL_798743                                                                 | Lighthouse Lab in Cambridge                                                                                                                                                                | Wellcome Sanger Institute for the COVID-19 Genomics UK (COG-UK) Consortium    | Rob Howes, The Lighthouse Lab in Cambridge and Alex Alderton, Roberto Amato, Sonia Goncalves, Ewan Harrison, David K. Jackson, Ian Johnston, Dominic Kwiatkowski, Cordelia Langford, John Sillitoe on behalf of the Wellcome Sanger Institute COVID-19 Surveillance Team                                                                                                                                                                                                                                                                                                                               |
| EPI_ISL_799067, EPI_ISL_799108                                                 | Lighthouse Lab in Glasgow                                                                                                                                                                  | Wellcome Sanger Institute for the COVID-19 Genomics UK (COG-UK) Consortium    | Harper VanSteenhouse, Yumi Kasai, David Gray, Carol Clugston, Anna Dominiczak and Alex Alderton, Roberto Amato, Sonia Goncalves, Ewan Harrison, David K. Jackson, Ian Johnston, Dominic Kwiatkowski, Cordelia Langford, John Sillitoe on behalf of the Wellcome Sanger Institute COVID-19 Surveillance Team                                                                                                                                                                                                                                                                                            |
| EPI_ISL_799121                                                                 | Lighthouse Lab in Cambridge                                                                                                                                                                | Wellcome Sanger Institute for the COVID-19 Genomics UK (COG-UK) Consortium    | Rob Howes, The Lighthouse Lab in Cambridge and Alex Alderton, Roberto Amato, Sonia Goncalves, Ewan Harrison, David K. Jackson, Ian Johnston, Dominic Kwiatkowski, Cordelia Langford, John Sillitoe on behalf of the Wellcome Sanger Institute COVID-19 Surveillance Team                                                                                                                                                                                                                                                                                                                               |
| EPI_ISL_799545, EPI_ISL_799667                                                 | Lighthouse Lab in Milton Keynes                                                                                                                                                            | Wellcome Sanger Institute for the COVID-19 Genomics UK (COG-UK) Consortium    | The Lighthouse Lab in Milton Keynes and Alex Alderton, Roberto Amato, Sonia Goncalves, Ewan Harrison, David K. Jackson, Ian Johnston, Dominic Kwiatkowski, Cordelia Langford, John Sillitoe on behalf of the Wellcome Sanger Institute COVID-19 Surveillance Team                                                                                                                                                                                                                                                                                                                                      |
| EPI_ISL_800004, EPI_ISL_800497,                                                | Lighthouse Lab in Cambridge                                                                                                                                                                | Wellcome Sanger Institute for the COVID-19 Genomics UK                        | Rob Howes, The Lighthouse Lab in Cambridge and Alex Alderton, Roberto Amato, Sonia Goncalves, Ewan Harrison, David K. Jackson, Ian Johnston,                                                                                                                                                                                                                                                                                                                                                                                                                                                           |

|                                                                                |                                                                                                                                                                                  |                                                                                                                            |                                                                                                                                                                                                                                                                                                                                                                                                                                                                                                                                                                                 |
|--------------------------------------------------------------------------------|----------------------------------------------------------------------------------------------------------------------------------------------------------------------------------|----------------------------------------------------------------------------------------------------------------------------|---------------------------------------------------------------------------------------------------------------------------------------------------------------------------------------------------------------------------------------------------------------------------------------------------------------------------------------------------------------------------------------------------------------------------------------------------------------------------------------------------------------------------------------------------------------------------------|
| EPI_ISL_800513, EPI_ISL_800567                                                 |                                                                                                                                                                                  | (COG-UK) Consortium                                                                                                        | Dominic Kwiatkowski, Cordelia Langford, John Sillitoe on behalf of the Wellcome Sanger Institute COVID-19 Surveillance Team                                                                                                                                                                                                                                                                                                                                                                                                                                                     |
| EPI_ISL_802573                                                                 | M Health Fairview                                                                                                                                                                | Minnesota Department of Health, Public Health Laboratory                                                                   | Alexandra Lorentz, Jacob Garfin, Matt Plumb, and Xiong Wang                                                                                                                                                                                                                                                                                                                                                                                                                                                                                                                     |
| EPI_ISL_802609, EPI_ISL_802634, EPI_ISL_802638, EPI_ISL_802643, EPI_ISL_802649 | Helix/Illumina                                                                                                                                                                   | Genomics and Discovery, Respiratory Viruses Branch, Division of Viral Diseases, Centers for Disease Control and Prevention | Peter W. Cook, Dhvani Batra, Ben L. Rambo-Martin Eileen de Feo, Jan Antico, Christine Tran, Matthew Tolentino, Shannon Wickline, Kim Getzlen, Brad Sickler, Jingtao Liu, Eric Allen, Phil Febbo, Summer Galloway, Nicole L. Washington, Simon White, Geraint Levan, Kelly Schiabor Barrett, Elizabeth Cirulli, Alexandre Boize, Ary Ascencio, Charlotte Rivera-Garcia, Ryan Cho, Jason Nguyen, Sherry Wang, Jimmy Ramirez, Tyler Cassens, Efrén Sandoval, Magnus Isaksson, William Lee, David Becker, Marc Laurent, James Lu, Clinton R. Paden, Suxiang Tong, Duncan MacCannell |
| EPI_ISL_803098                                                                 | Institute of Microbiology, Universidad San Francisco de Quito                                                                                                                    | Institute of Microbiology, Universidad San Francisco de Quito                                                              | Sully Márquez, Belén Prado-Vivar, Juan José Guadalupe, Monica Becerra-Wong, Bernardo Gutiérrez, Eulalia Pazmiño, Katalina Pacheco, Verónica Barragán, Patricio Rojas-Silva, Gabriel Trueba, Michelle Grunauer, Paúl Cárdenas                                                                                                                                                                                                                                                                                                                                                    |
| EPI_ISL_803854                                                                 | Hospital General Universitario Gregorio Marañón                                                                                                                                  | Hospital General Universitario Gregorio Marañón                                                                            | Sergio Buenestado Serrano, Pedro Sola Campoy, Laura Pérez-Lago, Pilar Catalán, Patricia Muñoz, Darío García de Viedma                                                                                                                                                                                                                                                                                                                                                                                                                                                           |
| EPI_ISL_803857                                                                 | Hospital General Universitario Gregorio Marañón                                                                                                                                  | Hospital General Universitario Gregorio Marañón                                                                            | Sergio Buenestado Serrano, Pedro Sola Campoy, Laura Pérez-Lago, Pilar Catalán, Patricia Muñoz, Darío García de Viedma.                                                                                                                                                                                                                                                                                                                                                                                                                                                          |
| EPI_ISL_803898                                                                 | National Institute for Infectious Diseases, INMI, "L. Spallanzani" IRCCS                                                                                                         | National Institute for Infectious Diseases, INMI, "L. Spallanzani" IRCCS                                                   | C.E.M Gruber, B Bartolini, E Giombini, M Rueca, O Butera, F Messina, A Di Caro, MR Capobianchi                                                                                                                                                                                                                                                                                                                                                                                                                                                                                  |
| EPI_ISL_803916                                                                 | Shimoga Institute of Medical Sciences                                                                                                                                            | Department of Neurovirology, National Institute of Mental Health and Neurosciences (NIMHANS)                               | Chitra Pattabiraman, Pramada Prasad, Anita S Desai, V Ravi                                                                                                                                                                                                                                                                                                                                                                                                                                                                                                                      |
| EPI_ISL_804239                                                                 | Respiratory Virus Unit, National Infection Service, Public Health England                                                                                                        | COVID-19 Genomics UK (COG-UK) Consortium                                                                                   | PHE Covid Sequencing Team                                                                                                                                                                                                                                                                                                                                                                                                                                                                                                                                                       |
| EPI_ISL_804946                                                                 | BIO-REFERENCE LABORATORIES                                                                                                                                                       | Wadsworth Center, New York State Department.of Health                                                                      | Kirsten St. George, Daryl M. Lamson, Alexis Russel, Matthew Shudt, Melissa A Leisner, Jonathan Plitnick, Navjot Singh, John Kelly, Sara Griesemer, Erasmus Schneider, Erica Lasek-Nesselquist                                                                                                                                                                                                                                                                                                                                                                                   |
| EPI_ISL_804948                                                                 | Wadsworth Center, New York State Department.of Health                                                                                                                            | Wadsworth Center, New York State Department.of Health                                                                      | Kirsten St. George, Daryl M. Lamson, Alexis Russel, Matthew Shudt, Melissa A Leisner, Jonathan Plitnick, Navjot Singh, John Kelly, Sara Griesemer, Erasmus Schneider, Erica Lasek-Nesselquist                                                                                                                                                                                                                                                                                                                                                                                   |
| EPI_ISL_804982                                                                 | BIO-REFERENCE LABORATORIES                                                                                                                                                       | Wadsworth Center, New York State Department of Health                                                                      | Kirsten St. George, Daryl M. Lamson, Alexis Russel, Matthew Shudt, Melissa A Leisner, Jonathan Plitnick, Navjot Singh, John Kelly, Erasmus Schneider, Erica Lasek-Nesselquist                                                                                                                                                                                                                                                                                                                                                                                                   |
| EPI_ISL_806544                                                                 | INSPI Instituto Nacional de Investigación en Salud Pública                                                                                                                       | Av. Julián Coronel 905 entre Esmeraldas y José Mascote Av. Juan Tanca Marengo No. 100 y Av. de las Américas                | Leandro Patiño, Doménica de Mora, Maritza Olmedo, Andrés Carrasco, Orson Mestanza, Mary Regato, Melissa Zambrano, Manuel González, Alfredo Bruno, Alberto Orlando.                                                                                                                                                                                                                                                                                                                                                                                                              |
| EPI_ISL_810965                                                                 | PathWest Laboratory Medicine WA                                                                                                                                                  | PathWest Laboratory Medicine WA Microbial Surveillance Unit                                                                | PathWest Laboratory Medicine WA Microbial Surveillance Unit                                                                                                                                                                                                                                                                                                                                                                                                                                                                                                                     |
| EPI_ISL_811082                                                                 | Respiratory Virus Unit, National Infection Service, Public Health England                                                                                                        | COVID-19 Genomics UK (COG-UK) Consortium                                                                                   | PHE Covid Sequencing Team                                                                                                                                                                                                                                                                                                                                                                                                                                                                                                                                                       |
| EPI_ISL_811651, EPI_ISL_811817, EPI_ISL_811927                                 | Lighthouse Lab in Milton Keynes                                                                                                                                                  | Wellcome Sanger Institute for the COVID-19 Genomics UK (COG-UK) Consortium                                                 | The Lighthouse Lab in Milton Keynes and Alex Alderton, Roberto Amato, Sonia Goncalves, Ewan Harrison, David K. Jackson, Ian Johnston, Dominic Kwiatkowski, Cordelia Langford, John Sillitoe on behalf of the Wellcome Sanger Institute COVID-19 Surveillance Team                                                                                                                                                                                                                                                                                                               |
| EPI_ISL_812251, EPI_ISL_812252                                                 | Kantonsarztamt Bern                                                                                                                                                              | Institute of Medical Virology, University of Zurich                                                                        | Stefan Schmutz, Maryam Zaheri, Verena Kufner, Annette Audigé, Maria Grünberg, Kevin Steiner, Jon Huder, Cyril Shah, Riccarda Capaul, Guido Bloemberg, Jürg Böni, Michael Huber, Alexandra Trkola                                                                                                                                                                                                                                                                                                                                                                                |
| EPI_ISL_812764, EPI_ISL_812773                                                 | Ministry of Health Turkey                                                                                                                                                        | Ministry of Health Turkey                                                                                                  | Fatma Bayraktar, Yasemin Cogun, Süleyman Yalcin, Aye Baak Alta, Gülay Korukluolu                                                                                                                                                                                                                                                                                                                                                                                                                                                                                                |
| EPI_ISL_813120                                                                 | University of Birmingham                                                                                                                                                         | COVID-19 Genomics UK (COG-UK) Consortium                                                                                   | Institute of Microbiology, University of Birmingham: Claire McMurray, Joanne Stockton, Samuel Nicholls, Radoslaw Poplawski, Will Rowe, Josh Quick, Nicholas Loman. University of Birmingham Testing Laboratory: Celina M Whalley, Andrew Bosworth, Charlotte Poxon, Kasun Wanigasooriya, Oliver Pickles, Mike Kidd, Alex Richter, Andrew D Beggs PHE Heartlands Lab: Husam Osman, Andrew Bosworth. Queen Elizabeth Hospital: Anna Casey                                                                                                                                         |
| EPI_ISL_814028, EPI_ISL_814033                                                 | Hospital General Universitario Gregorio Marañón                                                                                                                                  | SeqCOVID-SPAIN consortium/IBV(CSIC)                                                                                        | Darío García de Viedma, Laura Pérez-Lago, Marta Herranz, Jon Sicilia, Julia Suárez, Pilar Catalán, Patricia Muñoz and SeqCOVID-SPAIN consortium                                                                                                                                                                                                                                                                                                                                                                                                                                 |
| EPI_ISL_814163                                                                 | Israel Central Virology laboratory                                                                                                                                               | Israel National Consortium for SARS-CoV-2 sequencing                                                                       | Neta Zuckerman, Efrat Dahan Bucris, Michal Mandelboim, Dana Bar-Ilan, Oran Erster, Tzvia Mann, Omer Murik, David A. Zeevi, Assaf Rokney, Joseph Jaffe, Eva Nachum, Maya Davidovich Cohen, Ephraim Fass, Gal Zizelski Valenci, Mor Rubinstein, Efrat Rorman, Israel Nissan, Efrat Glick-Saar, Omri Nayshool, Gideon Rechavi, Ella Mendelson, Orna Mor                                                                                                                                                                                                                            |
| EPI_ISL_816407                                                                 | Virology Department, Sheffield Teaching Hospitals NHS Foundation Trust/Department of Infection, Immunity and Cardiovascular Disease, The Medical School, University of Sheffield | COVID-19 Genomics UK (COG-UK) Consortium                                                                                   | Thushan de Silva, Matthew Parker, Nikki Smith, Adri Angyal, Rebecca Brown, Luke Green, Rachel Tucker, Paul Parsons, Danielle Groves, Katie Johnson, Laura Carrilero, Alex Keeley, Dave Partridge, Matthew Wyles, Benjamin Lindsey, Mehmet Yavuz, Mohammad Raza, Cariad Evans                                                                                                                                                                                                                                                                                                    |
| EPI_ISL_819152, EPI_ISL_819157, EPI_ISL_819158, EPI_ISL_819159                 | Servicio de Microbiología, Hospital Universitario Son Espases                                                                                                                    | SeqCOVID-SPAIN consortium/IBV(CSIC)                                                                                        | Carla López-Causapé, Jordi Reina, Antonio Oliver and SeqCOVID-SPAIN consortium                                                                                                                                                                                                                                                                                                                                                                                                                                                                                                  |
| EPI_ISL_820611                                                                 | Lighthouse Lab in Alderley Park                                                                                                                                                  | Wellcome Sanger Institute for the COVID-19 Genomics UK (COG-UK) Consortium                                                 | Jacquelyn Wynn, Mairead Hyland, The Lighthouse Lab in Alderley Park and Alex Alderton, Roberto Amato, Sonia Goncalves, Ewan Harrison, David K. Jackson, Ian Johnston, Dominic Kwiatkowski, Cordelia Langford, John Sillitoe on behalf of the Wellcome Sanger Institute COVID-19 Surveillance Team                                                                                                                                                                                                                                                                               |
| EPI_ISL_820906, EPI_ISL_820986                                                 | Lighthouse Lab in Milton Keynes                                                                                                                                                  | Wellcome Sanger Institute for the COVID-19 Genomics UK (COG-UK) Consortium                                                 | The Lighthouse Lab in Milton Keynes and Alex Alderton, Roberto Amato, Sonia Goncalves, Ewan Harrison, David K. Jackson, Ian Johnston, Dominic Kwiatkowski, Cordelia Langford, John Sillitoe on behalf of the Wellcome Sanger Institute COVID-19 Surveillance Team                                                                                                                                                                                                                                                                                                               |
| EPI_ISL_821070, EPI_ISL_821263                                                 | Lighthouse Lab in Alderley Park                                                                                                                                                  | Wellcome Sanger Institute for the COVID-19 Genomics UK (COG-UK) Consortium                                                 | Jacquelyn Wynn, Mairead Hyland, The Lighthouse Lab in Alderley Park and Alex Alderton, Roberto Amato, Sonia Goncalves, Ewan Harrison, David K. Jackson, Ian Johnston, Dominic Kwiatkowski, Cordelia Langford, John Sillitoe on behalf of the Wellcome Sanger Institute COVID-19 Surveillance Team                                                                                                                                                                                                                                                                               |
| EPI_ISL_821638                                                                 | Lighthouse Lab in Milton Keynes                                                                                                                                                  | Wellcome Sanger Institute for the COVID-19 Genomics UK (COG-UK) Consortium                                                 | The Lighthouse Lab in Milton Keynes and Alex Alderton, Roberto Amato, Sonia Goncalves, Ewan Harrison, David K. Jackson, Ian Johnston, Dominic Kwiatkowski, Cordelia Langford, John Sillitoe on behalf of the Wellcome Sanger Institute COVID-19 Surveillance Team                                                                                                                                                                                                                                                                                                               |
| EPI_ISL_824294                                                                 | Institute of Microbiology, Universidad San Francisco de Quito                                                                                                                    | Institute of Microbiology, Universidad San Francisco de Quito                                                              | Belén Prado-Vivar, Sully Márquez, Juan José Guadalupe, Monica Becerra-Wong, Bernardo Gutiérrez, Eulalia Pazmiño, Katalina Pacheco, Verónica Barragán, Patricio Rojas-Silva, Gabriel Trueba, Michelle Grunauer, Paúl Cárdenas                                                                                                                                                                                                                                                                                                                                                    |
| EPI_ISL_824554                                                                 | New Mexico Department of Health Scientific Laboratory                                                                                                                            | New Mexico Department of Health Scientific Laboratory                                                                      | Ellie Johnson, Anastacia Griego-Fisher, D'eldra Malone                                                                                                                                                                                                                                                                                                                                                                                                                                                                                                                          |
| EPI_ISL_825044                                                                 | NHL Municipal Medical College, Ahmedbad                                                                                                                                          | Gujarat Biotechnology Research Centre                                                                                      | Monila Patel, Janvi Raval, Zarna Patel, Nitin Savaliya, Dinesh Kumar, Zuber Saiyed, Labdhi Pandya, Afzal Ansari, Nikha Trivedi, Apurvasinh Puvar, Ramesh Pandit, Jayshri Pethani, Atit Shah, NM Shaikh, Bimal Chauhan, Tanmay Mehta, Bhavin Prajapati, Chaitanya Joshi, Madhvi Joshi                                                                                                                                                                                                                                                                                            |
| EPI_ISL_825050                                                                 | NHL Municipal Medical College, Ahmedbad                                                                                                                                          | Gujarat Biotechnology Research Centre                                                                                      | Tanmay Mehta, Afzal Ansari, Nikha Trivedi, Apurvasinh Puvar, Ramesh Pandit, Janvi Raval, Zarna Patel, Nitin Savaliya, Dinesh Kumar, Zuber Saiyed, Labdhi Pandya, Jayshri Pethani, Monila Patel, Atit Shah, NM Shaikh, Bimal Chauhan, Bhavin Prajapati, Chaitanya Joshi, Madhvi Joshi                                                                                                                                                                                                                                                                                            |
| EPI_ISL_825054                                                                 | GMERS Medical College and Hospital, Gotri, Vadodara                                                                                                                              | Gujarat Biotechnology Research Centre                                                                                      | Kalpesh Mistry, Janvi Raval, Zarna Patel, Nitin Savaliya, Dinesh Kumar, Zuber Saiyed, Afzal Ansari, Nikha Trivedi, Apurvasinh Puvar, Ramesh Pandit, Mitesh Karmothi, Bithika Duttaroy, Chaitanya Joshi, Madhvi Joshi                                                                                                                                                                                                                                                                                                                                                            |
| EPI_ISL_825083                                                                 | National Public Health Laboratory, National Centre for Infectious Diseases                                                                                                       | National Public Health Laboratory, National Centre for Infectious Diseases                                                 | Tze Minn Mak, Sophie Octavia, Zhenyang Zhou, Lin Cui, Raymond Tzer Pin Lin                                                                                                                                                                                                                                                                                                                                                                                                                                                                                                      |
| EPI_ISL_825146, EPI_ISL_825151                                                 | Kidwai Memorial Institute of Oncology                                                                                                                                            | Department of Neurovirology, National Institute of Mental Health and Neurosciences (NIMHANS)                               | Chitra Pattabiraman, Pramada Prasad, Anita S Desai, V Ravi                                                                                                                                                                                                                                                                                                                                                                                                                                                                                                                      |
| EPI_ISL_826269, EPI_ISL_826270, EPI_ISL_826271, EPI_ISL_826272                 | University of Debrecen, Department of Medical Microbiology                                                                                                                       | National Laboratory of Virology, Szentgáothai Research Centre                                                              | Endre Gábor Tóth, Balázs Somogyi, Brigitta Zana, Eszter Csoma, Ferenc Jakab, Gábor Kemenesi                                                                                                                                                                                                                                                                                                                                                                                                                                                                                     |
| EPI_ISL_827396                                                                 | The National University Hospital of Iceland                                                                                                                                      | deCODE genetics                                                                                                            | Daniel F Gudbjartsson; Agnar Helgason; Hakon Jonsson; Olafur T Magnusson; Pall Melsted; Gudmundur L Norddahl; Jona Saemundsdottir; Asgeir Sigurdsson; Patrick Sulem; Arna B Agustsdottir; Hannes Eggertsson; Berglind Eiríksdóttir; Run Fridríksdóttir; Elisabet E Gardarsdóttir; Gudmundur                                                                                                                                                                                                                                                                                     |

|                                                                |                                                                                                                    |                                                                                                                                                                                                     |                                                                                                                                                                                                                                                                                                                                                                                                                                                                                                                                                                                                                                                                                                                                                                                                                                   |
|----------------------------------------------------------------|--------------------------------------------------------------------------------------------------------------------|-----------------------------------------------------------------------------------------------------------------------------------------------------------------------------------------------------|-----------------------------------------------------------------------------------------------------------------------------------------------------------------------------------------------------------------------------------------------------------------------------------------------------------------------------------------------------------------------------------------------------------------------------------------------------------------------------------------------------------------------------------------------------------------------------------------------------------------------------------------------------------------------------------------------------------------------------------------------------------------------------------------------------------------------------------|
| EPI_ISL_827689, EPI_ISL_827922, EPI_ISL_827927, EPI_ISL_827950 | deCODE genetics                                                                                                    | deCODE genetics                                                                                                                                                                                     | Georgsson; Olafía S Gretarsdóttir; Kjartan R Gudmundsson; Thora R Gunnarsdóttir; Arnaldur Gylfason; Hilma Holm; Brynjar O Jensson; Aslaug Jonasdóttir; Kamilla S Josefsdóttir; Thórhur Kristjánsson; Droplaug N Magnúsdóttir; Solví Rognvaldsson; Louise le Roux; Gudrun Sigmundsdóttir; Gardar Sveinbjörnsson; Kristín E Sveinsdóttir; Maney Sveinsdóttir; Emil A Thorarensen; Bjarni Thorbjörnsson; Gisli Masson; Ingileif Jónsdóttir; Alma Moller; Thorolfur Gudnason; Karl G Kristinsson; Unnur Thorsteinsdóttir; Kari Stefansson                                                                                                                                                                                                                                                                                             |
| EPI_ISL_830214                                                 | BOSTON HEART DIAGNOSTICS CORP                                                                                      | Wadsworth Center, New York State Department of Health                                                                                                                                               | Daniel F Gudbjartsson; Agnar Helgason; Hakon Jonsson; Olafur T Magnusson; Pall Melsted; Gudmundur L Norddahl; Jona Saemundsdóttir; Asgeir Sigurdsson; Patrick Sulem; Arna B Agustsdóttir; Hannes Eggertsson; Berglind Eiríksdóttir; Run Fridríksdóttir; Elisabet E Gardarsdóttir; Gudmundur Georgsson; Olafía S Gretarsdóttir; Kjartan R Gudmundsson; Thora R Gunnarsdóttir; Arnaldur Gylfason; Hilma Holm; Brynjar O Jensson; Aslaug Jonasdóttir; Kamilla S Josefsdóttir; Thórhur Kristjánsson; Droplaug N Magnúsdóttir; Solví Rognvaldsson; Louise le Roux; Gudrun Sigmundsdóttir; Gardar Sveinbjörnsson; Kristín E Sveinsdóttir; Maney Sveinsdóttir; Emil A Thorarensen; Bjarni Thorbjörnsson; Gisli Masson; Ingileif Jónsdóttir; Alma Moller; Thorolfur Gudnason; Karl G Kristinsson; Unnur Thorsteinsdóttir; Kari Stefansson |
| EPI_ISL_830572                                                 | NORTHWELL HEALTH LABORATORIES                                                                                      | Wadsworth Center, New York State Department of Health                                                                                                                                               | Kirsten St. George, Daryl M. Lamson, Alexis Russel, Matthew Shudt, Melissa A Leisner, Jonathan Plitnick, Navjot Singh, John Kelly, Erasmus Schneider, Erica Lasek-Nesselquist                                                                                                                                                                                                                                                                                                                                                                                                                                                                                                                                                                                                                                                     |
| EPI_ISL_831663                                                 | Institute of Virology, Biomedical Research Center of the Slovak Academy of Sciences, Bratislava                    | Faculty of Natural Sciences, Comenius University, Bratislava                                                                                                                                        | Kristína Bořšová, Viktória abanová, Broa Brejčová, Viktória Hodorová, Sabina Fumaová Havlíková, Juraj Kopáek, Martina Liková, ubomíra Lukáiková, Martina Neboháková, Monika Sláviková, Tomáš Vina, Boris Nosek                                                                                                                                                                                                                                                                                                                                                                                                                                                                                                                                                                                                                    |
| EPI_ISL_831670                                                 | Institute of Virology, Biomedical Research Center of the Slovak Academy of Sciences, Bratislava                    | Faculty of Natural Sciences, Comenius University, Bratislava                                                                                                                                        | Viktória abanová, Kristína Bořšová, Broa Brejčová, Viktória Hodorová, Sabina Fumaová Havlíková, Juraj Kopáek, Martina Liková, ubomíra Lukáiková, Martina Neboháková, Monika Sláviková, Tomáš Vina, Jozef Nosek, Boris Klempa                                                                                                                                                                                                                                                                                                                                                                                                                                                                                                                                                                                                      |
| EPI_ISL_833038                                                 | Laboratorio de Referencia Nacional de Virus Respiratorio. Instituto Nacional de Salud Perú                         | Laboratorio de Referencia Nacional de Biotecnología y Biología Molecular. Instituto Nacional de Salud Perú                                                                                          | Carlos Padilla Barcena, Luis Barcena, Karolyn Vega Chozo, Priscila Lope Pari, Omar Caceres Rey, Marco Galarza Perez, Maribel Huaranga Nuñez, Johanna Balbuena Torrez, Henri Bailon Calderon, Nancy Rojas Serrano                                                                                                                                                                                                                                                                                                                                                                                                                                                                                                                                                                                                                  |
| EPI_ISL_833044                                                 | SIESP CHIETI - DRIVE IN CHIETI                                                                                     | Istituto Zooprofilattico Sperimentale dell'Abruzzo e Molise "G. Caporale"                                                                                                                           | Lorusso A, Marcacci M, Di Domenico M, Ancora M, Curini V, Mangone I, Rinaldi A, Delli Compagni E, Di Pasquale A, Cammà C, Puglia I, Calistri P, Savini G                                                                                                                                                                                                                                                                                                                                                                                                                                                                                                                                                                                                                                                                          |
| EPI_ISL_833137                                                 | Laboratorio de Ecologia de Doencas Transmissíveis na Amazonia, Instituto Leonidas e Maria Deane - Fiocruz Amazonia | Laboratorio de Ecologia de Doencas Transmissíveis na Amazonia, Instituto Leonidas e Maria Deane - Fiocruz Amazonia                                                                                  | Valdinete Nascimento, Victor Souza, André Corado, Fernanda Nascimento, George Silva, Ágatha Costa, Debora Duarte, Karina Pessoa, Matilde Mejia, Luciana Gonçalves, Maria Júlia Brandão, Michele Jesus, Felipe Naveca on behalf of the Fiocruz COVID-19 Genomic Surveillance Network                                                                                                                                                                                                                                                                                                                                                                                                                                                                                                                                               |
| EPI_ISL_833233, EPI_ISL_833234, EPI_ISL_833246                 | SIESP DIPARTIMENTO DI PREVENZIONE CHIETI                                                                           | Istituto Zooprofilattico Sperimentale dell'Abruzzo e Molise "G. Caporale"                                                                                                                           | Lorusso A, Marcacci M, Di Domenico M, Curini V, Ancora M, Cammà C, Rinaldi A, Mangone I, Di Pasquale A, Puglia I, Calistri P, Savini G.                                                                                                                                                                                                                                                                                                                                                                                                                                                                                                                                                                                                                                                                                           |
| EPI_ISL_833287                                                 | SIESP CHIETI - DRIVE IN ORTONA                                                                                     | Istituto Zooprofilattico Sperimentale dell'Abruzzo e Molise "G. Caporale"                                                                                                                           | Lorusso A, Marcacci M, Di Domenico M, Ancora M, Curini V, Mangone I, Rinaldi A, Di Pasquale A, Cammà C, Puglia I, Calistri P, Savini G                                                                                                                                                                                                                                                                                                                                                                                                                                                                                                                                                                                                                                                                                            |
| EPI_ISL_833578                                                 | National Reference Laboratory for COVID-19, Pasteur Institute of Iran                                              | National Reference Laboratory for COVID-19, Pasteur Institute of Iran                                                                                                                               | Zahra Ahmadi, Marzieh Sadjadi, Tahmineh Jalali, Mohammad Hassan Pouriayevali, Mahsa Tavakoli, Zahra Fereydouni, Setareh Khashanian, Sanam Azad-Manjiri, Tahereh Mohammadi, Kayhan Azadmanesh, Zabihollah Shoja, Parastoo Yekta, Farideh Niknam, Hessam Nemati, Ahmad Ghasemi, Sahar Khakifirooz, Sepideh Gerdooei, Maryam Rostamtabar, Sana Eybpoosh, Mohammad Mehdi Mortazavipour, Mohamad Sadegh Shams Nosrati, Zeynab Veisizadeh, Mostafa Salehi-Vaziri                                                                                                                                                                                                                                                                                                                                                                        |
| EPI_ISL_833825                                                 | Lighthouse Lab in Cambridge                                                                                        | Wellcome Sanger Institute for the COVID-19 Genomics UK (COG-UK) Consortium                                                                                                                          | Rob Howes, The Lighthouse Lab in Cambridge and Alex Alderton, Roberto Amato, Sonia Goncalves, Ewan Harrison, David K. Jackson, Ian Johnston, Dominic Kwiatkowski, Cordelia Langford, John Sillitoe on behalf of the Wellcome Sanger Institute COVID-19 Surveillance Team                                                                                                                                                                                                                                                                                                                                                                                                                                                                                                                                                          |
| EPI_ISL_834503, EPI_ISL_834991                                 | Lighthouse Lab in Alderley Park                                                                                    | Wellcome Sanger Institute for the COVID-19 Genomics UK (COG-UK) Consortium                                                                                                                          | Jacquelyn Wynn, Mairead Hyland, The Lighthouse Lab in Alderley Park and Alex Alderton, Roberto Amato, Sonia Goncalves, Ewan Harrison, David K. Jackson, Ian Johnston, Dominic Kwiatkowski, Cordelia Langford, John Sillitoe on behalf of the Wellcome Sanger Institute COVID-19 Surveillance Team                                                                                                                                                                                                                                                                                                                                                                                                                                                                                                                                 |
| EPI_ISL_835275                                                 | Lighthouse Lab in Glasgow                                                                                          | Wellcome Sanger Institute for the COVID-19 Genomics UK (COG-UK) Consortium                                                                                                                          | Harper VanSteenhouse, Yumi Kasai, David Gray, Carol Clugston, Anna Dominiczak and Alex Alderton, Roberto Amato, Sonia Goncalves, Ewan Harrison, David K. Jackson, Ian Johnston, Dominic Kwiatkowski, Cordelia Langford, John Sillitoe on behalf of the Wellcome Sanger Institute COVID-19 Surveillance Team                                                                                                                                                                                                                                                                                                                                                                                                                                                                                                                       |
| EPI_ISL_835763, EPI_ISL_836126                                 | Lighthouse Lab in Milton Keynes                                                                                    | Wellcome Sanger Institute for the COVID-19 Genomics UK (COG-UK) Consortium                                                                                                                          | The Lighthouse Lab in Milton Keynes and Alex Alderton, Roberto Amato, Sonia Goncalves, Ewan Harrison, David K. Jackson, Ian Johnston, Dominic Kwiatkowski, Cordelia Langford, John Sillitoe on behalf of the Wellcome Sanger Institute COVID-19 Surveillance Team                                                                                                                                                                                                                                                                                                                                                                                                                                                                                                                                                                 |
| EPI_ISL_837127                                                 | Respiratory Virus Unit, National Infection Service, Public Health England                                          | COVID-19 Genomics UK (COG-UK) Consortium                                                                                                                                                            | PHE Covid Sequencing Team                                                                                                                                                                                                                                                                                                                                                                                                                                                                                                                                                                                                                                                                                                                                                                                                         |
| EPI_ISL_837850, EPI_ISL_837881                                 | Department of Pathology, University of Cambridge                                                                   | COVID-19 Genomics UK (COG-UK) Consortium                                                                                                                                                            | Aminu S. Jahun, Yasmin Chaudhry, Grant Hall, Iliana Georgana, Myra Hosmillio, Martin D. Curran, Maite Pinckert, Surenra Parmar, Ian Goodfellow                                                                                                                                                                                                                                                                                                                                                                                                                                                                                                                                                                                                                                                                                    |
| EPI_ISL_842652                                                 | Laboratorio de Biología Molecular Hospital Pedro de Elizalde                                                       | Grupo de Genómica y Bioinformática del Instituto de Investigación de la Cadena Láctea CONICET-INTA on behalf of 'Proyecto Argentino Interinstitucional de genómica de SARS-CoV-2' (PAIS Consortium) | Amadio, AF, Eberhardt, MF; Irazoqui, M; Indart, J; Rocovich, J; Montoto Piazza, L; Wenk, G; Martin, ME; Sanchez, MF; Marchetti, P; Morandi, F; Sueiro, ML; Claps, A; Bressan, L; Torres, FJ; Chamorro, J; Gondolesi, J; Gómez, ML; Diaz, B; Rosales, D; Alegre, F; Zamora, N; Osaba, E; Paez, E; Lorenzo, F; Torres, C; Aulicino, P; König, G; Alexay, S; Natale, M; Valinotto, L; Lusso, S; Goya, S; Nabaes Jodar, MS; Viegas, M.                                                                                                                                                                                                                                                                                                                                                                                                |
| EPI_ISL_843056, EPI_ISL_843137                                 | Barts Health NHS Trust                                                                                             | COVID-19 Genomics UK (COG-UK) Consortium                                                                                                                                                            | CUTINO-MOGUEL, Maria-Teresa; HARRINGTON, David; OWOYEMI, Dola; SHYLINI, Raghavendran; BROAD, Claire; KELE, Beatrix                                                                                                                                                                                                                                                                                                                                                                                                                                                                                                                                                                                                                                                                                                                |
| EPI_ISL_843159                                                 | Regional Virus Laboratory, Belfast Health and Social Care Trust                                                    | COVID-19 Genomics UK (COG-UK) Consortium                                                                                                                                                            | Conall McCaughey, James McKenna, Tanya Curran, Susan Feeney, Alison Watt, Ciara Cox, Mairead Connor, Zoltan Molnar, David Simpson, Derek Fairley                                                                                                                                                                                                                                                                                                                                                                                                                                                                                                                                                                                                                                                                                  |
| EPI_ISL_845608                                                 | KU Leuven, Rega Institute, Clinical and Epidemiological Virology                                                   | KU Leuven, Rega Institute, Clinical and Epidemiological Virology                                                                                                                                    | Tony Wawina-Bokalanga, Bert Vanmechelen, Joan Martí-Carerras, Piet Maes                                                                                                                                                                                                                                                                                                                                                                                                                                                                                                                                                                                                                                                                                                                                                           |
| EPI_ISL_845938, EPI_ISL_846160                                 | Lighthouse Lab in Cambridge                                                                                        | Wellcome Sanger Institute for the COVID-19 Genomics UK (COG-UK) Consortium                                                                                                                          | Rob Howes, The Lighthouse Lab in Cambridge and Alex Alderton, Roberto Amato, Sonia Goncalves, Ewan Harrison, David K. Jackson, Ian Johnston, Dominic Kwiatkowski, Cordelia Langford, John Sillitoe on behalf of the Wellcome Sanger Institute COVID-19 Surveillance Team                                                                                                                                                                                                                                                                                                                                                                                                                                                                                                                                                          |
| EPI_ISL_846205, EPI_ISL_846345                                 | Lighthouse Lab in Alderley Park                                                                                    | Wellcome Sanger Institute for the COVID-19 Genomics UK (COG-UK) Consortium                                                                                                                          | Jacquelyn Wynn, Mairead Hyland, The Lighthouse Lab in Alderley Park and Alex Alderton, Roberto Amato, Sonia Goncalves, Ewan Harrison, David K. Jackson, Ian Johnston, Dominic Kwiatkowski, Cordelia Langford, John Sillitoe on behalf of the Wellcome Sanger Institute COVID-19 Surveillance Team                                                                                                                                                                                                                                                                                                                                                                                                                                                                                                                                 |
| EPI_ISL_846567                                                 | Lab voor klinische biologie                                                                                        | Lab voor klinische biologie                                                                                                                                                                         | Hannelore Hamerlinck, Bruno Verhaselt                                                                                                                                                                                                                                                                                                                                                                                                                                                                                                                                                                                                                                                                                                                                                                                             |
| EPI_ISL_846644                                                 | Hopital                                                                                                            | National Reference Center for Viruses of Respiratory Infections, Institut Pasteur, Paris                                                                                                            | Marion Barbet, Sylvie Behillil, Méline Bizard, Angela Brisebarre, Camille Capel, Etienne Simon-Lorière, Vincent Enouf, Maud Vanpeene, Sylvie van der Werf                                                                                                                                                                                                                                                                                                                                                                                                                                                                                                                                                                                                                                                                         |
| EPI_ISL_846652                                                 | Servicio de Microbiología. Consorcio Hospital General Universitario de Valencia                                    | SeqCOVID-SPAIN consortium/IBV(CSIC)                                                                                                                                                                 | María Dolores Ocete, Begoña Fuster Escrivá, David Navalpotro, Rafael Medina González, Concepción Gimeno Cardona and SeqCOVID-SPAIN consortium                                                                                                                                                                                                                                                                                                                                                                                                                                                                                                                                                                                                                                                                                     |
| EPI_ISL_849635                                                 | DIPARTIMENTO PREVENZIONE AVEZZANO-SERVIZIO DI IGIENE EPIDEMIOLOGIA E SANITA' PUBBLICA                              | Istituto Zooprofilattico Sperimentale dell'Abruzzo e Molise "G. Caporale"                                                                                                                           | Lorusso A, Marcacci M, Di Domenico M, Curini V, Ancora M, Cammà C, Rinaldi A, Mangone I, Di Pasquale A, Puglia I, Savini G.                                                                                                                                                                                                                                                                                                                                                                                                                                                                                                                                                                                                                                                                                                       |
| EPI_ISL_849749                                                 | Public Health Virology Laboratory, Forensic and Scientific Services (PHV-FSS)                                      | Public Health Virology Laboratory, Forensic and Scientific Services (PHV-FSS)                                                                                                                       | Son Nguyen et al                                                                                                                                                                                                                                                                                                                                                                                                                                                                                                                                                                                                                                                                                                                                                                                                                  |
| EPI_ISL_850508                                                 | Hospital de Tortosa Verge de la Cinta                                                                              | Hospital Universitari Vall d'Hebron - Vall d'Hebron Institut de Recerca                                                                                                                             | Cristina Andrés, María Piñana, Josep F Abril, Damir García-Cehic, Ariadna Rando, Juliana Esperalba, María Gema Codina, Carla Castillo, María Carmen Martín, Tomás Pumarola, Josep Quer, Andrés Antón                                                                                                                                                                                                                                                                                                                                                                                                                                                                                                                                                                                                                              |
| EPI_ISL_850513                                                 | Hospital Universitari de Bellvitge                                                                                 | Hospital Universitari Vall d'Hebron - Vall d'Hebron Institut de Recerca                                                                                                                             | Cristina Andrés, María Piñana, Josep F Abril, Damir García-Cehic, Ariadna Rando, Juliana Esperalba, María Gema Codina, Carla Castillo, María Carmen Martín, Tomás Pumarola, Josep Quer, Andrés Antón                                                                                                                                                                                                                                                                                                                                                                                                                                                                                                                                                                                                                              |
| EPI_ISL_850542, EPI_ISL_850598,                                | Helix/Illumina                                                                                                     | Genomics and Discovery, Respiratory Viruses Branch,                                                                                                                                                 | Peter W. Cook, Dhvani Batra, Ben L. Rambo-Martin Eileen de Feo, Jan Antico, Christine Tran, Matthew Tolentino, Shannon Wickline, Kim Gietzen, Brad                                                                                                                                                                                                                                                                                                                                                                                                                                                                                                                                                                                                                                                                                |

|                                                                                                                |                                                                                                 |                                                                                                                              |                                                                                                                                                                                                                                                                                                                                                                                                                                                                                                                                                                                 |
|----------------------------------------------------------------------------------------------------------------|-------------------------------------------------------------------------------------------------|------------------------------------------------------------------------------------------------------------------------------|---------------------------------------------------------------------------------------------------------------------------------------------------------------------------------------------------------------------------------------------------------------------------------------------------------------------------------------------------------------------------------------------------------------------------------------------------------------------------------------------------------------------------------------------------------------------------------|
| EPI_ISL_850610, EPI_ISL_850618, EPI_ISL_850628, EPI_ISL_850638                                                 |                                                                                                 | Division of Viral Diseases, Centers for Disease Control and Prevention                                                       | Sickler, Jingtao Liu, Eric Allen, Phil Febbo, Summer Galloway, Nicole L. Washington, Simon White, Geraint Levan, Kelly Schiabor Barrett, Elizabeth Cirulli, Alexandre Bolze, Ary Ascencio, Charlotte Rivera-Garcia, Ryan Cho, Jason Nguyen, Sherry Wang, Jimmy Ramirez, Tyler Cassens, Efrén Sandoval, Magnus Isaksson, William Lee, David Becker, Marc Laurent, James Lu, Clinton R. Paden, Suxiang Tong, Duncan MacCannell                                                                                                                                                    |
| EPI_ISL_850679                                                                                                 | The National Institute of Public Health                                                         | State Veterinary Institute Prague                                                                                            | Nagy,A,Jirincova,H;Trnka,D;Vecerova,J                                                                                                                                                                                                                                                                                                                                                                                                                                                                                                                                           |
| EPI_ISL_850754, EPI_ISL_850886                                                                                 | Helix / Illumina                                                                                | Genomics and Discovery, Respiratory Viruses Branch, Division of Viral Diseases, Centers for Disease Control and Prevention   | Peter W. Cook, Dhvani Batra, Ben L. Rambo-Martin Eileen de Feo, Jan Antico, Christine Tran, Matthew Tolentino, Shannon Wickline, Kim Gietzen, Brad Sickler, Jingtao Liu, Eric Allen, Phil Febbo, Summer Galloway, Nicole L. Washington, Simon White, Geraint Levan, Kelly Schiabor Barrett, Elizabeth Cirulli, Alexandre Bolze, Ary Ascencio, Charlotte Rivera-Garcia, Ryan Cho, Jason Nguyen, Sherry Wang, Jimmy Ramirez, Tyler Cassens, Efrén Sandoval, Magnus Isaksson, William Lee, David Becker, Marc Laurent, James Lu, Clinton R. Paden, Suxiang Tong, Duncan MacCannell |
| EPI_ISL_850960                                                                                                 | Helix/Illumina                                                                                  | Genomics and Discovery, Respiratory Viruses Branch, Division of Viral Diseases, Centers for Disease Control and Prevention   | Peter W. Cook, Dhvani Batra, Ben L. Rambo-Martin Eileen de Feo, Jan Antico, Christine Tran, Matthew Tolentino, Shannon Wickline, Kim Gietzen, Brad Sickler, Jingtao Liu, Eric Allen, Phil Febbo, Summer Galloway, Nicole L. Washington, Simon White, Geraint Levan, Kelly Schiabor Barrett, Elizabeth Cirulli, Alexandre Bolze, Ary Ascencio, Charlotte Rivera-Garcia, Ryan Cho, Jason Nguyen, Sherry Wang, Jimmy Ramirez, Tyler Cassens, Efrén Sandoval, Magnus Isaksson, William Lee, David Becker, Marc Laurent, James Lu, Clinton R. Paden, Suxiang Tong, Duncan MacCannell |
| EPI_ISL_851851                                                                                                 | Lighthouse Lab in Glasgow                                                                       | Wellcome Sanger Institute for the COVID-19 Genomics UK (COG-UK) Consortium                                                   | Harper VanSteenhouse, Yumi Kasai, David Gray, Carol Clugston, Anna Dominiczak and Alex Alderton, Roberto Amato, Sonia Goncalves, Ewan Harrison, David K. Jackson, Ian Johnston, Dominic Kwiatkowski, Cordelia Langford, John Sillitoe on behalf of the Wellcome Sanger Institute COVID-19 Surveillance Team                                                                                                                                                                                                                                                                     |
| EPI_ISL_851869, EPI_ISL_851953                                                                                 | Lighthouse Lab in Alderley Park                                                                 | Wellcome Sanger Institute for the COVID-19 Genomics UK (COG-UK) Consortium                                                   | Jacquelyn Wynn, Mairead Hyland, The Lighthouse Lab in Alderley Park and Alex Alderton, Roberto Amato, Sonia Goncalves, Ewan Harrison, David K. Jackson, Ian Johnston, Dominic Kwiatkowski, Cordelia Langford, John Sillitoe on behalf of the Wellcome Sanger Institute COVID-19 Surveillance Team                                                                                                                                                                                                                                                                               |
| EPI_ISL_852842                                                                                                 | Laboratory of Molecular Biology, Diagnostyka sp. z o.o.                                         | genXone SA, Research & Development Laboratory                                                                                | Maciej Sykulski, Grzegorz Nowicki, Jakub Grabowski, Natalia Drwska-Matelska, ukasz Krych, Micha Kaszuba                                                                                                                                                                                                                                                                                                                                                                                                                                                                         |
| EPI_ISL_853009, EPI_ISL_853017, EPI_ISL_853024, EPI_ISL_853029                                                 | Hospital General Universitario Gregorio Marañón                                                 | SeqCOVID-SPAIN consortium/IBV(CSIC)                                                                                          | Darío García de Viedma, Laura Pérez-Lago, Pedro J Sola-Campoy, Sergio Buenestado-Serrano, Marta Herranz, Víctor Manuel de la Cueva, Julia Suárez, Pilar Catalán, Patricia Muñoz and SeqCOVID-SPAIN consortium                                                                                                                                                                                                                                                                                                                                                                   |
| EPI_ISL_854368                                                                                                 | Wadsworth Center, New York State Department of Health                                           | Wadsworth Center, New York State Department of Health                                                                        | Kirsten St. George, Daryl M. Lamson, Alexis Russel, Matthew Shudt, Melissa A Leisner, Jonathan Plitnick, Navjot Singh, John Kelly, Erasmus Schneider, Erica Lasek-Nesselquist                                                                                                                                                                                                                                                                                                                                                                                                   |
| EPI_ISL_855092                                                                                                 | Quest Diagnostics                                                                               | Quest Diagnostics                                                                                                            | Rosenthal,S.H., Gerasimova,A., Kagan,R.M., Anderson, B., Hua, M., Liu Y., Bernstein, L.E., Livingston, K.E., Perez, A., Shalhout, D.F., Shlyakhter, I.A., Owen, R., Tanpaiboon, P., Lacbawan, F.                                                                                                                                                                                                                                                                                                                                                                                |
| EPI_ISL_857042, EPI_ISL_857053                                                                                 | Platform BIS UZA/UAntwerpen, University Hospital Antwerp, Edegem, Belgium                       | UAntwerp, Laboratory of Medical Microbiology, Campus Drie Eiken S6.26, Universiteitsplein 1, 2610, Wilrijk, Antwerp, Belgium | Basil Britto Xavier, Jasmine Coppens, Christine Lammens, Veerle Matheussen, Herman Goossens                                                                                                                                                                                                                                                                                                                                                                                                                                                                                     |
| EPI_ISL_857470                                                                                                 | National Public Health Laboratory, National Centre for Infectious Diseases                      | National Public Health Laboratory, National Centre for Infectious Diseases                                                   | Tze Minn Mak, Sophie Octavia, Zhenyang Zhou, Lin Cui, Raymond Tzer Pin Lin                                                                                                                                                                                                                                                                                                                                                                                                                                                                                                      |
| EPI_ISL_859878, EPI_ISL_859885, EPI_ISL_860038, EPI_ISL_860072                                                 | BTC, Khalifa University                                                                         | BTC, Khalifa University                                                                                                      | Al Safar et al                                                                                                                                                                                                                                                                                                                                                                                                                                                                                                                                                                  |
| EPI_ISL_860182, EPI_ISL_860183                                                                                 | Bangalore Medical College and Research Institute                                                | Department of Neurovirology, National Institute of Mental Health and Neurosciences (NIMHANS)                                 | Chitra Pattabiraman, Pramada Prasad, Anson Kunjumon George, Risha Rasheed, Darshan Sreenivas, Nakka Vijay Kiran Reddy, Anita S Desai, V Ravi                                                                                                                                                                                                                                                                                                                                                                                                                                    |
| EPI_ISL_860844                                                                                                 | Labo Analyses med                                                                               | National Reference Center for Viruses of Respiratory Infections, Institut Pasteur, Paris                                     | Marion Barbet, Sylvie Behillil, Méline Bizard, Angela Brisebarre, Camille Capel, Etienne Simon-Lorière, Vincent Enouf, Maud Vanpeene, Sylvie van der Werf,Amzalag Jonas                                                                                                                                                                                                                                                                                                                                                                                                         |
| EPI_ISL_861332                                                                                                 | DOHMH Central Harlem                                                                            | New York City Public Health Laboratory                                                                                       | Jade Wang, et al.                                                                                                                                                                                                                                                                                                                                                                                                                                                                                                                                                               |
| EPI_ISL_861424                                                                                                 | Oklahoma Animal Disease Diagnostic Laboratory                                                   | Oklahoma Animal Disease Diagnostic Laboratory                                                                                | Sai Narayanan, Girish Patil, Sunil More, Jeremiah Saliki, Akhilesh Ramachandran                                                                                                                                                                                                                                                                                                                                                                                                                                                                                                 |
| EPI_ISL_861534, EPI_ISL_861540, EPI_ISL_861544, EPI_ISL_861552, EPI_ISL_861557, EPI_ISL_861559, EPI_ISL_861577 | Instituto Nacional de Saude (INSA)                                                              | Instituto Nacional de Saude (INSA)                                                                                           | Borges et al                                                                                                                                                                                                                                                                                                                                                                                                                                                                                                                                                                    |
| EPI_ISL_861732                                                                                                 | Tempus                                                                                          | Grubaugh Lab - Yale School of Public Health                                                                                  | Tara Alpert, Joseph Fauver, Anderson Brito, Mallery Breban, Anne Wylie, Chantal Vogels, Mary Petrone, Annie Watkins, Chaney Kalinich, Isabel Ott, Nathan Grubaugh                                                                                                                                                                                                                                                                                                                                                                                                               |
| EPI_ISL_861736                                                                                                 | Yale Pathology Lab                                                                              | Grubaugh Lab - Yale School of Public Health                                                                                  | Tara Alpert, Joseph Fauver, Chen Liu, Pei Hui, Jianhui Wang, Susan Bell and Han Zhou, Anderson Brito, Mallery Breban, Anne Wylie, Chantal Vogels, Mary Petrone, Chaney Kalinich, Isabel Ott, Arnau Casanovas, Catherine Muenker, Adam Moore, Alice Lu, Maria Tokuyama, Patrick Wong, Peiwen Lu, Saad Omer, Richard Martinello, Allison Nelson, Shelli Farhadian, Akiko Iwasaki, Charlese Dela Cruz, Albert Ko, Nathan Grubaugh                                                                                                                                                  |
| EPI_ISL_861737                                                                                                 | Tempus                                                                                          | Grubaugh Lab - Yale School of Public Health                                                                                  | Tara Alpert, Joseph Fauver, Anderson Brito, Mallery Breban, Anne Wylie, Chantal Vogels, Mary Petrone, Annie Watkins, Chaney Kalinich, Isabel Ott, Nathan Grubaugh                                                                                                                                                                                                                                                                                                                                                                                                               |
| EPI_ISL_861758                                                                                                 | Murphy Medical Associates                                                                       | Grubaugh Lab - Yale School of Public Health                                                                                  | Tara Alpert, Joseph Fauver, Anderson Brito, Mallery Breban, Anne Wylie, Chantal Vogels, Mary Petrone, Annie Watkins, Chaney Kalinich, Isabel Ott, Nathan Grubaugh                                                                                                                                                                                                                                                                                                                                                                                                               |
| EPI_ISL_861761, EPI_ISL_861762, EPI_ISL_861769                                                                 | Tempus                                                                                          | Grubaugh Lab - Yale School of Public Health                                                                                  | Tara Alpert, Joseph Fauver, Anderson Brito, Mallery Breban, Anne Wylie, Chantal Vogels, Mary Petrone, Annie Watkins, Chaney Kalinich, Isabel Ott, Nathan Grubaugh                                                                                                                                                                                                                                                                                                                                                                                                               |
| EPI_ISL_861860                                                                                                 | Labormedizinisches Zentrum Dr Risch                                                             | University Hospital Basel, Clinical Bacteriology                                                                             | Tim Roloff, Madlen Stange, Helena MB Seth-Smith, Alfredo Mari, Karoline Leuzinger, Julia Bielicki, Nadia Wohlwend,Martin Risch, Lorenz Risch, Manuel Battegay, Hans Hirsch, Adrian Egli                                                                                                                                                                                                                                                                                                                                                                                         |
| EPI_ISL_862043                                                                                                 | CERBA                                                                                           | CERBA LAB                                                                                                                    | Roquebert B; Costa JM; Hedbaut E; Trombert S; Lecorche E; Verdurme L; Malek Ramdane, Olivi M; Haïm-Boukoba S.                                                                                                                                                                                                                                                                                                                                                                                                                                                                   |
| EPI_ISL_862212                                                                                                 | Respiratory Virus Unit, National Infection Service, Public Health England                       | COVID-19 Genomics UK (COG-UK) Consortium                                                                                     | PHE Covid Sequencing Team                                                                                                                                                                                                                                                                                                                                                                                                                                                                                                                                                       |
| EPI_ISL_862546                                                                                                 | Consejería de Sanidad y Asuntos Sociales                                                        | Instituto de Salud Carlos III                                                                                                | Iglesias-Caballero, M. Camarero, S. Molinero Calamita, M. González-Esguevillas, M. Pozo, F. Casas, I. Jiménez, P. Jiménez, M. Zaballos, A. Monzón, S. Varona, S. Juliá, M. Cuesta, I. Gutiérrez, G.                                                                                                                                                                                                                                                                                                                                                                             |
| EPI_ISL_862551                                                                                                 | Hospital J.M. Morales Meseguer                                                                  | Instituto de Salud Carlos III                                                                                                | Iglesias-Caballero, M. Camarero, S. Molinero Calamita, M. González-Esguevillas, M. . Pozo, F. Casas, I. Jiménez, P. Jiménez, M. Zaballos, A. Monzón, S. Varona, S. Juliá, M. Cuesta, I. Guerrero, C.                                                                                                                                                                                                                                                                                                                                                                            |
| EPI_ISL_862554                                                                                                 | Compejo Hospitalario Xeral-Calde                                                                | Instituto de Salud Carlos III                                                                                                | Iglesias-Caballero, M.Camarero, S. Molinero Calamita, M. González-Esguevillas, M. Pozo, F. Casas, I. Jiménez, P. Jiménez, M. Zaballos, A. Monzón, S. Varona, S. Juliá, M. Cuesta, I. Alonso, P.                                                                                                                                                                                                                                                                                                                                                                                 |
| EPI_ISL_862556                                                                                                 | Gerencia de Asistencia Sanitaria de Soria                                                       | Instituto de Salud Carlos III                                                                                                | Iglesias-Caballero, M.Camarero, S. Molinero Calamita, M. González-Esguevillas, M. Pozo, F. Casas, I. Jiménez, P. Jiménez, M. Zaballos, A. Monzón, S. Varona, S. Juliá, M. Cuesta, I. Aldea, C.                                                                                                                                                                                                                                                                                                                                                                                  |
| EPI_ISL_862559                                                                                                 | Consejería de Sanidad y Asuntos Sociales                                                        | Instituto de Salud Carlos III                                                                                                | Iglesias-Caballero, M. Camarero, S. Molinero Calamita, M. González-Esguevillas, M. Pozo, F. Casas, I. Jiménez, P. Jiménez, M. Zaballos, A. Monzón, S. Varona, S. Juliá, M. Cuesta, I. Gutiérrez, G.                                                                                                                                                                                                                                                                                                                                                                             |
| EPI_ISL_862836                                                                                                 | National Institute of Infectious Diseases-Prof. Dr. Matei Bals Molecular Diagnostics Laboratory | National Institute of Infectious Diseases-Prof. Dr. Matei Bals Molecular Diagnostics Laboratory                              | Leontina Banica, Marius Surleac, Corina Casangiu, Petre Milu, Andreea Tudor, Simona Paraschiv, Dan Otelea                                                                                                                                                                                                                                                                                                                                                                                                                                                                       |
| EPI_ISL_863612, EPI_ISL_863748, EPI_ISL_864364, EPI_ISL_864492                                                 | Lighthouse Lab in Milton Keynes                                                                 | Wellcome Sanger Institute for the COVID-19 Genomics UK (COG-UK) Consortium                                                   | The Lighthouse Lab in Milton Keynes and Alex Alderton, Roberto Amato, Sonia Goncalves, Ewan Harrison, David K. Jackson, Ian Johnston, Dominic Kwiatkowski, Cordelia Langford, John Sillitoe on behalf of the Wellcome Sanger Institute COVID-19 Surveillance Team                                                                                                                                                                                                                                                                                                               |

|                                                                                |                                                                                                                                  |                                                                                                                                          |                                                                                                                                                                                                                                                                                                                                                                                                                                                                                                                                                                                                                           |
|--------------------------------------------------------------------------------|----------------------------------------------------------------------------------------------------------------------------------|------------------------------------------------------------------------------------------------------------------------------------------|---------------------------------------------------------------------------------------------------------------------------------------------------------------------------------------------------------------------------------------------------------------------------------------------------------------------------------------------------------------------------------------------------------------------------------------------------------------------------------------------------------------------------------------------------------------------------------------------------------------------------|
| EPI_ISL_864734                                                                 | University Hospitals of Geneva, Laboratory of Virology                                                                           | HUG, Laboratory of Virology and the Health2030 Genome Center                                                                             | Samuel Cordey, Ana Rita Goncalves, Laurent Kaiser, Lorenzo Cerutti, Henri Pegeot, Melyssa Elies, Deborah Penet, Keith Harshman, Ioannis Xenarios, Emmanouil Dermitzakis                                                                                                                                                                                                                                                                                                                                                                                                                                                   |
| EPI_ISL_864756, EPI_ISL_864922                                                 | Department of Pathology, University of Cambridge                                                                                 | COVID-19 Genomics UK (COG-UK) Consortium                                                                                                 | Aminu S. Jahun, Yasmin Chaudhry, Grant Hall, Iliana Georgana, Myra Hosmillo, Martin D. Curran, Malte Pinckert, Surendra Parmar, Ian Goodfellow                                                                                                                                                                                                                                                                                                                                                                                                                                                                            |
| EPI_ISL_865517                                                                 | Barts Health NHS Trust                                                                                                           | COVID-19 Genomics UK (COG-UK) Consortium                                                                                                 | CUTINO-MOGUEL, Maria-Teresa; HARRINGTON, David; OWOYEMI, Dola; KULASEGARAN-SHYLINI, Raghavendran; BROAD, Claire; KELE, Beatrix                                                                                                                                                                                                                                                                                                                                                                                                                                                                                            |
| EPI_ISL_865608                                                                 | University College London, Great Ormond Street Hospital for Children NHS Foundation Trust, Imperial College Healthcare NHS Trust | COVID-19 Genomics UK (COG-UK) Consortium                                                                                                 | Sergi Castellano, Rachel Williams, Mark Kristiansen, Paola Resende Silva, Sunando Roy, Tony Brooks, Helena Tutill, Paola Niola, Patricia Dyal, Charlotte Williams, Leysa Forrest, Yasmin Panchbhaya, Jacqueline Findlay, Samuel Weeks, Julianne Brown, Kathryn Harris, Paul Randell, James Price, Alison Holmes, Judith Breuer                                                                                                                                                                                                                                                                                            |
| EPI_ISL_866068                                                                 | University College London Hospital                                                                                               | COVID-19 Genomics UK (COG-UK) Consortium                                                                                                 | Judith Heaney, Matthew Byott, Catherine Houlihan, Dan Frampton, Stuart Kirk, Moira Spyer and Eleni Nastouli                                                                                                                                                                                                                                                                                                                                                                                                                                                                                                               |
| EPI_ISL_866613, EPI_ISL_866680                                                 | Quadram Institute Bioscience                                                                                                     | COVID-19 Genomics UK (COG-UK) Consortium                                                                                                 | Dave J. Baker, Gemma L. Kay, Alp Aydin, Thanh Le-Viet, Steven Rudder, Ana P. Tedim, Anastasia Kolyva, Maria Diaz, Leonardo de Oliveira Martins, Nabil-Fareed Alikhan, Lizzie Meadows, Rachael Stanley, Ngozi Elumogo, Muhammed Yasin, Nicholas M. Thomson, Alexander J Trotter, Rachel Gilroy, Samuel Bloomfield, Claire Stuart, Andrew Bell, Reenesh Prakash, Samir Derwisevic, Alison E. Mather, John Wain, Mark Webber, Andrew J. Page, Justin O'Grady                                                                                                                                                                 |
| EPI_ISL_867089                                                                 | Oxford Viromics, NDM, University of Oxford; Oxford University Hospitals; Basingstoke and North Hampshire Hospital                | COVID-19 Genomics UK (COG-UK) Consortium                                                                                                 | Tanya Golubchik, David Bonsall, George Macintyre, Amy Trebes, Mariateresa de Cesare, Catrin Moore, Alex Mobbs, Anita Justice, Robert Shaw, Monique Andersson, Timothy Peto, Emma Wise, Nathan Moore, Jessica Lynch, Nick Cortes, Matilde Mori, Stephen Kidd, David Buck, John Todd, Christophe Fraser                                                                                                                                                                                                                                                                                                                     |
| EPI_ISL_867309                                                                 | Originating lab: Wales Specialist Virology Centre Sequencing lab: Pathogen Genomics Unit                                         | Public Health Wales Microbiology Cardiff Wales Specialist Virology Centre                                                                | Catherine Moore, Johnathan Evans, Laura Gifford, Malorie Perry, Simon Cottrell, Angela Marchbank, Alec Birchley, Alexander Adams, Amy Gaskin, Bree Gatica-Wilcox, Jason Coombes, Joel Southgate, Lauren Gilber, Lee Graham, Nicole Pacchiarini, Sara Kumziene-Summerhayes, Sarah Taylor, Sophie Jones, Sara Rey, Matthew Bull, Joanne Watkins, Sally Corden, Tom Connor                                                                                                                                                                                                                                                   |
| EPI_ISL_869032                                                                 | Bioinformatics and Biostatistics Lab, Advanced Sequencing Facility                                                               | COVID-19 Genomics UK (COG-UK) Consortium                                                                                                 | Aengus Stewart, Jerome Nicod, Chelsea Sawyer, Laura Cubitt, Harshil Patel, Margaret Crawford                                                                                                                                                                                                                                                                                                                                                                                                                                                                                                                              |
| EPI_ISL_869241                                                                 | Suceava County Emergency Hospital                                                                                                | "Stefan cel Mare" University Metagenomics Laboratory                                                                                     | Lobiuc Andrei, Puscaselu Roxana                                                                                                                                                                                                                                                                                                                                                                                                                                                                                                                                                                                           |
| EPI_ISL_870319, EPI_ISL_870321                                                 | University of Michigan Clinical Microbiology Laboratory                                                                          | Lauring Lab, University of Michigan, Department of Microbiology and Immunology                                                           | Valesano                                                                                                                                                                                                                                                                                                                                                                                                                                                                                                                                                                                                                  |
| EPI_ISL_872193                                                                 | Caribbean Public Health Agency                                                                                                   | Carrington Lab, Department of Building 36, First Floor Biochemistry Unit, Faculty of Medical Sciences, The University of the West Indies | Nikita S. D. Sahadeo, Arianne Brown-Jordan, Vernie Ramkissoon, Sarah Hill, Naresh Nandram, Avery Hinds, Jerome Foster, Stanley Giddings, Karla Georges, Marsha Ivey, Rahul Naidu, Risha Singh, SueMin Nathaniel, Rajini Haraksingh, Jaya Jayaraman, Chinna Chinnadurai, Adesh Ramsubhag, Nuno Faria, Oliver Pybus, Christopher Oura, Gabriel Escobar, Christine V. F. Carrington                                                                                                                                                                                                                                          |
| EPI_ISL_872194, EPI_ISL_872196                                                 | Caribbean Public Health Agency                                                                                                   | Carrington Lab, Department of PreClinical Sciences, Faculty of Medical Sciences, The University of the West Indies                       | Nikita S. D. Sahadeo, Arianne Brown-Jordan, Vernie Ramkissoon, Sarah Hill, Naresh Nandram, Avery Hinds, Jerome Foster, Stanley Giddings, Karla Georges, Marsha Ivey, Rahul Naidu, Risha Singh, SueMin Nathaniel, Rajini Haraksingh, Jaya Jayaraman, Chinna Chinnadurai, Adesh Ramsubhag, Nuno Faria, Oliver Pybus, Christopher Oura, Gabriel Escobar, Christine V. F. Carrington                                                                                                                                                                                                                                          |
| EPI_ISL_872206                                                                 | Hopital                                                                                                                          | National Reference Center for Viruses of Respiratory Infections, Institut Pasteur, Paris                                                 | Marion Barbet, Sylvie Behillil, Méline Bizard, Angela Brisebarre, Camille Capel, Etienne Simon-Lorière, Vincent Enouf, Maud Vanpeene, Sylvie van der Werf, Morvan Odile                                                                                                                                                                                                                                                                                                                                                                                                                                                   |
| EPI_ISL_872219, EPI_ISL_872268                                                 | Hopital                                                                                                                          | National Reference Center for Viruses of Respiratory Infections, Institut Pasteur, Paris                                                 | Marion Barbet, Sylvie Behillil, Méline Bizard, Angela Brisebarre, Camille Capel, Etienne Simon-Lorière, Vincent Enouf, Maud Vanpeene, Sylvie van der Werf, Fourgeaud Jacques                                                                                                                                                                                                                                                                                                                                                                                                                                              |
| EPI_ISL_872292, EPI_ISL_872293                                                 | Hopital                                                                                                                          | National Reference Center for Viruses of Respiratory Infections, Institut Pasteur, Paris                                                 | Marion Barbet, Sylvie Behillil, Méline Bizard, Angela Brisebarre, Camille Capel, Etienne Simon-Lorière, Vincent Enouf, Maud Vanpeene, Sylvie van der Werf, Guigon Aurélie                                                                                                                                                                                                                                                                                                                                                                                                                                                 |
| EPI_ISL_872625                                                                 | Nigeria Centre for Disease Control (NCDC)                                                                                        | African Centre of Excellence for Genomics of Infectious Diseases (ACEGID), Redeemer's University                                         | Oluniyi P.E. et al                                                                                                                                                                                                                                                                                                                                                                                                                                                                                                                                                                                                        |
| EPI_ISL_873079                                                                 | University of Michigan Clinical Microbiology Laboratory                                                                          | Lauring Lab, University of Michigan, Department of Microbiology and Immunology                                                           | Valesano                                                                                                                                                                                                                                                                                                                                                                                                                                                                                                                                                                                                                  |
| EPI_ISL_873406, EPI_ISL_873423, EPI_ISL_873523                                 | Lighthouse Lab in Milton Keynes                                                                                                  | Wellcome Sanger Institute for the COVID-19 Genomics UK (COG-UK) Consortium                                                               | The Lighthouse Lab in Milton Keynes and Alex Alderton, Roberto Amato, Sonia Goncalves, Ewan Harrison, David K. Jackson, Ian Johnston, Dominic Kwiatkowski, Cordelia Langford, John Sillitoe on behalf of the Wellcome Sanger Institute COVID-19 Surveillance Team                                                                                                                                                                                                                                                                                                                                                         |
| EPI_ISL_873621, EPI_ISL_873752, EPI_ISL_873791, EPI_ISL_873946, EPI_ISL_873949 | Lighthouse Lab in Cambridge                                                                                                      | Wellcome Sanger Institute for the COVID-19 Genomics UK (COG-UK) Consortium                                                               | Rob Howes, The Lighthouse Lab in Cambridge and Alex Alderton, Roberto Amato, Sonia Goncalves, Ewan Harrison, David K. Jackson, Ian Johnston, Dominic Kwiatkowski, Cordelia Langford, John Sillitoe on behalf of the Wellcome Sanger Institute COVID-19 Surveillance Team                                                                                                                                                                                                                                                                                                                                                  |
| EPI_ISL_874375, EPI_ISL_874453, EPI_ISL_874514, EPI_ISL_874759, EPI_ISL_874861 | Lighthouse Lab in Alderley Park                                                                                                  | Wellcome Sanger Institute for the COVID-19 Genomics UK (COG-UK) Consortium                                                               | Jacquelyn Wynn, Mairead Hyland, The Lighthouse Lab in Alderley Park and Alex Alderton, Roberto Amato, Sonia Goncalves, Ewan Harrison, David K. Jackson, Ian Johnston, Dominic Kwiatkowski, Cordelia Langford, John Sillitoe on behalf of the Wellcome Sanger Institute COVID-19 Surveillance Team                                                                                                                                                                                                                                                                                                                         |
| EPI_ISL_875215, EPI_ISL_875292, EPI_ISL_875338                                 | Lighthouse Lab in Milton Keynes                                                                                                  | Wellcome Sanger Institute for the COVID-19 Genomics UK (COG-UK) Consortium                                                               | The Lighthouse Lab in Milton Keynes and Alex Alderton, Roberto Amato, Sonia Goncalves, Ewan Harrison, David K. Jackson, Ian Johnston, Dominic Kwiatkowski, Cordelia Langford, John Sillitoe on behalf of the Wellcome Sanger Institute COVID-19 Surveillance Team                                                                                                                                                                                                                                                                                                                                                         |
| EPI_ISL_875346                                                                 | National Institute of Infectious Diseases-Prof. Dr. Matei Bals Molecular Diagnostics Laboratory                                  | National Institute of Infectious Diseases-Prof. Dr. Matei Bals Molecular Diagnostics Laboratory                                          | Leontina Banica, Marius Surleac, Corina Casangiu, Petre Milu, Andreea Tudor, Simona Paraschiv, Dan Otelea                                                                                                                                                                                                                                                                                                                                                                                                                                                                                                                 |
| EPI_ISL_875527                                                                 | Institute of Virology, Biomedical Research Center of the Slovak Academy of Sciences, Bratislava                                  | Faculty of Natural Sciences, Comenius University, Bratislava                                                                             | Broa Brejová, Viktória abanová, Kristína Boršová, Viktória Hodorová, Sabina Fumaová Havlíková, Juraj Kopáek, Martina Liková, ubomira Lukáiková, Martina Neboháová, Monika Sláviková, Tomáš Vína, Jozef Nosek, Boris Kiempa                                                                                                                                                                                                                                                                                                                                                                                                |
| EPI_ISL_875551                                                                 | ULSS 1 Dolomiti                                                                                                                  | Istituto Zooprofilattico Sperimentale delle Venezie                                                                                      | Adelaide Milani, Alessia Schivo, Annalisa Salviato, Erika Giorgia Quaranta, Ambra Pastori, Bianca Zecchin, Alice Fusaro, Isabella Monne, Calogero Terregino, Antonia Ricci                                                                                                                                                                                                                                                                                                                                                                                                                                                |
| EPI_ISL_875558                                                                 | Microbiologia e Virologia                                                                                                        | Istituto Zooprofilattico Sperimentale delle Venezie                                                                                      | Adelaide Milani, Alessia Schivo, Annalisa Salviato, Erika Giorgia Quaranta, Ambra Pastori, Bianca Zecchin, Alice Fusaro, Isabella Monne, Calogero Terregino, Antonia Ricci                                                                                                                                                                                                                                                                                                                                                                                                                                                |
| EPI_ISL_876595, EPI_ISL_876596                                                 | TN Division of Laboratory Services                                                                                               | Pathogen Discovery, Respiratory Viruses Branch, Division of Viral Diseases, Centers for Disease Control and Prevention                   | Ying Tao, Yan Li, Jing Zhang, Krista Queen, Anna Uehara, Peter Cook, Clinton R. Paden, Haibin Wang, Suxiang Tong                                                                                                                                                                                                                                                                                                                                                                                                                                                                                                          |
| EPI_ISL_876631                                                                 | Helix/Illumina                                                                                                                   | Genomics and Discovery, Respiratory Viruses Branch, Division of Viral Diseases, Centers for Disease Control and Prevention               | Peter W. Cook, Dhvani Batra, Ben L. Rambo-Martin, Eileen de Feo, Jan Antico, Christine Tran, Matthew Tolentino, Shannon Wickline, Kim Gietzen, Brad Sickler, Jingtao Liu, Eric Allen, Phil Febbo, Summer Galloway, Nicole L. Washington, Simon White, Geraint Levan, Kelly Schiabor Barrett, Elizabeth Cirulli, Alexandre Bolze, Ary Ascencio, Charlotte Rivera-Garcia, Ryan Cho, Jason Nguyen, Sherry Wang, Jimmy Ramirez, Tyler Cassens, Efrén Sandoval, Magnus Isaksson, William Lee, David Becker, Marc Laurent, James Lu, Clinton R. Paden, Suxiang Tong, Duncan MacCannell, Suppiah J, Kamel K, Azizan MA, Thayan R |
| EPI_ISL_877228                                                                 | Institute for Medical Research, Infectious Disease Research Centre, National Institutes of Health, Ministry of Health Malaysia   | Institute for Medical Research, Infectious Disease Research Centre, National Institutes of Health, Ministry of Health Malaysia           |                                                                                                                                                                                                                                                                                                                                                                                                                                                                                                                                                                                                                           |
| EPI_ISL_877561                                                                 | Institute of Microbiology, Universidad San Francisco de Quito                                                                    | Institute of Microbiology, Universidad San Francisco de Quito                                                                            | Belén Prado-Vivar, Sully Márquez, Juan José Guadalupe, Monica Becerra-Wong, Bernardo Gutiérrez, Manuel Jibaja, Maribel Cruz, Nelson Remache, Milton Tobar, Alexandra Noboa, Ana Diaz, Diego Morocho, Sayra Caiza, Diego Mora, Edgar Espinoza, Pablo Flores, Juan Monge, Vanesa Ramirez, Cristian Pelayez, Fernando Martinez, Jorge Caamaño, Marco Jimenez, Hector Moya, Veronica Paredes, Eduardo Males, Fabricio Picoita, Andres Moreno, Fernanda Garcia, Viviana Medina, Verónica Barragán, Patricio Rojas-Silva, Gabriel Trueba, Michelle Grunauer, Paul Cárdenas                                                      |
| EPI_ISL_877562                                                                 | Institute of Microbiology, Universidad San Francisco de Quito                                                                    | Institute of Microbiology, Universidad San Francisco de Quito                                                                            | Belén Prado-Vivar, Sully Márquez, Juan José Guadalupe, Monica Becerra-Wong, Bernardo Gutiérrez, Piedad Villacis, Rosa Avila, Adriana Arnao, David Acosta-España, Alvaro Davalos de Castro, Verónica Barragán, Patricio Rojas-Silva, Gabriel Trueba, Michelle Grunauer, Paul Cárdenas                                                                                                                                                                                                                                                                                                                                      |
| EPI_ISL_878042                                                                 | Lighthouse Lab in Alderley Park                                                                                                  | Wellcome Sanger Institute for the COVID-19 Genomics UK                                                                                   | Jacquelyn Wynn, Mairead Hyland, The Lighthouse Lab in Alderley Park and Alex Alderton, Roberto Amato, Sonia Goncalves, Ewan Harrison, David K.                                                                                                                                                                                                                                                                                                                                                                                                                                                                            |



|                                                                                                                                                                                |                                                                                                 |                                                                                                 |                                                                                                                                                                                                                                                                                                                                                                                                                                                                                                                                                                                                                                                                                                                                                                                   |
|--------------------------------------------------------------------------------------------------------------------------------------------------------------------------------|-------------------------------------------------------------------------------------------------|-------------------------------------------------------------------------------------------------|-----------------------------------------------------------------------------------------------------------------------------------------------------------------------------------------------------------------------------------------------------------------------------------------------------------------------------------------------------------------------------------------------------------------------------------------------------------------------------------------------------------------------------------------------------------------------------------------------------------------------------------------------------------------------------------------------------------------------------------------------------------------------------------|
|                                                                                                                                                                                |                                                                                                 | (COG-UK) Consortium                                                                             | Jackson, Ian Johnston, Dominic Kwiatkowski, Cordelia Langford, John Sillitoe on behalf of the Wellcome Sanger Institute COVID-19 Surveillance Team                                                                                                                                                                                                                                                                                                                                                                                                                                                                                                                                                                                                                                |
| EPI_ISL_878448, EPI_ISL_878474, EPI_ISL_878519, EPI_ISL_878571, EPI_ISL_878576, EPI_ISL_878579                                                                                 | Biobol Diagnostic Laboratories                                                                  | Andersen lab at Scripps Research                                                                | Issa Abu-Dayyeh, Ahmad Tibi, Lama Hussein, Lina Mohammad, Zein Naber, Amid Abdelnour with SEARCH Alliance San Diego                                                                                                                                                                                                                                                                                                                                                                                                                                                                                                                                                                                                                                                               |
| EPI_ISL_879212                                                                                                                                                                 | Lighthouse Lab in Alderley Park                                                                 | Wellcome Sanger Institute for the COVID-19 Genomics UK (COG-UK) Consortium                      | Jacquelyn Wynn, Mairead Hyland, The Lighthouse Lab in Alderley Park and Alex Alderton, Roberto Amato, Sonia Goncalves, Ewan Harrison, David K. Jackson, Ian Johnston, Dominic Kwiatkowski, Cordelia Langford, John Sillitoe on behalf of the Wellcome Sanger Institute COVID-19 Surveillance Team                                                                                                                                                                                                                                                                                                                                                                                                                                                                                 |
| EPI_ISL_879419                                                                                                                                                                 | Lighthouse Lab in Cambridge                                                                     | Wellcome Sanger Institute for the COVID-19 Genomics UK (COG-UK) Consortium                      | Rob Howes, The Lighthouse Lab in Cambridge and Alex Alderton, Roberto Amato, Sonia Goncalves, Ewan Harrison, David K. Jackson, Ian Johnston, Dominic Kwiatkowski, Cordelia Langford, John Sillitoe on behalf of the Wellcome Sanger Institute COVID-19 Surveillance Team                                                                                                                                                                                                                                                                                                                                                                                                                                                                                                          |
| EPI_ISL_879919                                                                                                                                                                 | Lighthouse Lab in Alderley Park                                                                 | Wellcome Sanger Institute for the COVID-19 Genomics UK (COG-UK) Consortium                      | Jacquelyn Wynn, Mairead Hyland, The Lighthouse Lab in Alderley Park and Alex Alderton, Roberto Amato, Sonia Goncalves, Ewan Harrison, David K. Jackson, Ian Johnston, Dominic Kwiatkowski, Cordelia Langford, John Sillitoe on behalf of the Wellcome Sanger Institute COVID-19 Surveillance Team                                                                                                                                                                                                                                                                                                                                                                                                                                                                                 |
| EPI_ISL_880782                                                                                                                                                                 | Lighthouse Lab in Milton Keynes                                                                 | Wellcome Sanger Institute for the COVID-19 Genomics UK (COG-UK) Consortium                      | The Lighthouse Lab in Milton Keynes and Alex Alderton, Roberto Amato, Sonia Goncalves, Ewan Harrison, David K. Jackson, Ian Johnston, Dominic Kwiatkowski, Cordelia Langford, John Sillitoe on behalf of the Wellcome Sanger Institute COVID-19 Surveillance Team                                                                                                                                                                                                                                                                                                                                                                                                                                                                                                                 |
| EPI_ISL_881148, EPI_ISL_881180, EPI_ISL_881379, EPI_ISL_881638, EPI_ISL_881848, EPI_ISL_882572                                                                                 | Lighthouse Lab in Alderley Park                                                                 | Wellcome Sanger Institute for the COVID-19 Genomics UK (COG-UK) Consortium                      | Jacquelyn Wynn, Mairead Hyland, The Lighthouse Lab in Alderley Park and Alex Alderton, Roberto Amato, Sonia Goncalves, Ewan Harrison, David K. Jackson, Ian Johnston, Dominic Kwiatkowski, Cordelia Langford, John Sillitoe on behalf of the Wellcome Sanger Institute COVID-19 Surveillance Team                                                                                                                                                                                                                                                                                                                                                                                                                                                                                 |
| EPI_ISL_882612, EPI_ISL_882618                                                                                                                                                 | Hospital Ramón y Cajal                                                                          | Hospital Ramón y Cajal                                                                          | José M Gonzalez-Alba, Concepción Rodríguez, Melanie Abreu, Laura Martínez, Val F Lanza, Luz Leticia Olavarrieta, Rafael Cantón, JC Galán                                                                                                                                                                                                                                                                                                                                                                                                                                                                                                                                                                                                                                          |
| EPI_ISL_882664                                                                                                                                                                 | LACEN do Distrito Federal                                                                       | Instituto Adolfo Lutz, Interdisciplinary Procedures Center, Strategic Laboratory                | Claudio Tavares Sacchi, Claudia Regina Gonçalves, Erica Valessa Ramos Gomes, Karoline Rodrigues Campos                                                                                                                                                                                                                                                                                                                                                                                                                                                                                                                                                                                                                                                                            |
| EPI_ISL_882805                                                                                                                                                                 | MSHS Clinical Microbiology Laboratories                                                         | MSHS Pathogen Surveillance Program                                                              | Ana S. Gonzalez-Reiche, Hala Alshammari, Mitchell J. Sullivan, Brianna Ciferri, Ajay Obla, Angela Amoako, Mahmoud Awawda, Elena Hirsch, Ashley S. Salimbanon, Levy Sominsky, Katherine Beach, Kayla Russo, Charles Gleason, Shelcie Fabre, Giulio Kleiner, Zenab Khan, Bremy Alburquerque, Adriana van de Guchte, Komal Srivastava, Matthew M. Hernandez, Jayeeta Dutta, Denise Jurczynszak, Emily Ferreri, Nancy Francoeur, Betsaida Salom Melo, Irina Oussenko, Gintaras Deikus, Juan Soto, Shwetha Hara Sridhar, Ying-Chih Wang, Kathryn Twyman, Andrew Kasarskis, Deena R. Altman, Robert Sebra, Adolfo Garcia-Sastre, Marta Luksza, Gopi Patel, Sarah Schaefer, Melissa Gitman, Michael D. Nowak, Alberto Paniz-Mondolfi, Emilia Mia Sordillo, Viviana Simon, Harm van Bakel |
| EPI_ISL_882919                                                                                                                                                                 | INMI Lazzaro Spallanzani IRCCS                                                                  | INMI Lazzaro Spallanzani IRCCS                                                                  | C.E.M Gruber, B Bartolini, E Giombini, M Rueca, O Butera, F Messina, A Di Caro, MR Capobianchi                                                                                                                                                                                                                                                                                                                                                                                                                                                                                                                                                                                                                                                                                    |
| EPI_ISL_883287                                                                                                                                                                 | SIESP DIPARTIMENTO DI PREVENZIONE CHIE                                                          | Istituto Zooprofilattico Sperimentale dell'Abruzzo e Molise "G. Caporale"                       | Lorusso A, Marcacci M, Di Domenico M, Ancora M, Curini V, Mangone I, Rinaldi A, Scialabba S, Di Pasquale A, Cammà C, Puglia I, Calistri P, Savini G                                                                                                                                                                                                                                                                                                                                                                                                                                                                                                                                                                                                                               |
| EPI_ISL_883288                                                                                                                                                                 | SIESP CHIETI-DRIVE IN ORTONA                                                                    | Istituto Zooprofilattico Sperimentale dell'Abruzzo e Molise "G. Caporale"                       | Lorusso A, Marcacci M, Di Domenico M, Ancora M, Curini V, Mangone I, Rinaldi A, Scialabba S, Di Pasquale A, Cammà C, Puglia I, Calistri P, Savini G                                                                                                                                                                                                                                                                                                                                                                                                                                                                                                                                                                                                                               |
| EPI_ISL_883293                                                                                                                                                                 | SIESP CHIETI-DRIVE IN LANCIANO                                                                  | Istituto Zooprofilattico Sperimentale dell'Abruzzo e Molise "G. Caporale"                       | Lorusso A, Marcacci M, Di Domenico M, Ancora M, Curini V, Mangone I, Rinaldi A, Scialabba S, Di Pasquale A, Cammà C, Puglia I, Calistri P, Savini G                                                                                                                                                                                                                                                                                                                                                                                                                                                                                                                                                                                                                               |
| EPI_ISL_883294                                                                                                                                                                 | RP Guardiagrele-Ospedale di Comunità                                                            | Istituto Zooprofilattico Sperimentale dell'Abruzzo e Molise "G. Caporale"                       | Lorusso A, Marcacci M, Di Domenico M, Ancora M, Curini V, Mangone I, Rinaldi A, Scialabba S, Di Pasquale A, Cammà C, Puglia I, Calistri P, Savini G                                                                                                                                                                                                                                                                                                                                                                                                                                                                                                                                                                                                                               |
| EPI_ISL_883296                                                                                                                                                                 | SIESP CHIETI-DRIVE IN ORTONA                                                                    | Istituto Zooprofilattico Sperimentale dell'Abruzzo e Molise "G. Caporale"                       | Lorusso A, Marcacci M, Di Domenico M, Ancora M, Curini V, Mangone I, Rinaldi A, Scialabba S, Di Pasquale A, Cammà C, Puglia I, Calistri P, Savini G                                                                                                                                                                                                                                                                                                                                                                                                                                                                                                                                                                                                                               |
| EPI_ISL_883320, EPI_ISL_883321, EPI_ISL_883322                                                                                                                                 | DOHMH Jamaica                                                                                   | New York City Public Health Laboratory                                                          | Jade Wang, et al.                                                                                                                                                                                                                                                                                                                                                                                                                                                                                                                                                                                                                                                                                                                                                                 |
| EPI_ISL_883427                                                                                                                                                                 | NORTHWELL HEALTH LABORATORIES                                                                   | Wadsworth Center, New York State Department of Health                                           | Kirsten St. George, Daryl M. Lamson, Alexis Russel, Matthew Shudt, Melissa A Leisner, Jonathan Plitnick, Navjot Singh, John Kelly, Erasmus Schneider, Erica Lasek-Nesselquist                                                                                                                                                                                                                                                                                                                                                                                                                                                                                                                                                                                                     |
| EPI_ISL_883429                                                                                                                                                                 | BOSTON HEART DIAGNOSTICS CORP                                                                   | Wadsworth Center, New York State Department of Health                                           | Kirsten St. George, Daryl M. Lamson, Alexis Russel, Matthew Shudt, Melissa A Leisner, Jonathan Plitnick, Navjot Singh, John Kelly, Erasmus Schneider, Erica Lasek-Nesselquist                                                                                                                                                                                                                                                                                                                                                                                                                                                                                                                                                                                                     |
| EPI_ISL_883965                                                                                                                                                                 | Labo Analyses med                                                                               | National Reference Center for Viruses of Respiratory Infections, Institut Pasteur, Paris        | Marion Barbet, Sylvie Behillil, Méline Bizard, Angela Brisebarre, Camille Capel, Etienne Simon-Lorière, Vincent Enouf, Maud Vanpeene, Sylvie van der Werf, Amzalag Jonas                                                                                                                                                                                                                                                                                                                                                                                                                                                                                                                                                                                                          |
| EPI_ISL_883979                                                                                                                                                                 | Hopital                                                                                         | National Reference Center for Viruses of Respiratory Infections, Institut Pasteur, Paris        | Marion Barbet, Sylvie Behillil, Méline Bizard, Angela Brisebarre, Camille Capel, Etienne Simon-Lorière, Vincent Enouf, Maud Vanpeene, Sylvie van der Werf, Fourgeaud Jacques                                                                                                                                                                                                                                                                                                                                                                                                                                                                                                                                                                                                      |
| EPI_ISL_884054                                                                                                                                                                 | TEMPUS LABS INC                                                                                 | Wadsworth Center, New York State Department of Health                                           | Kirsten St. George, Daryl M. Lamson, Alexis Russel, Matthew Shudt, Melissa A Leisner, Jonathan Plitnick, Navjot Singh, John Kelly, Erasmus Schneider, Erica Lasek-Nesselquist                                                                                                                                                                                                                                                                                                                                                                                                                                                                                                                                                                                                     |
| EPI_ISL_884580, EPI_ISL_884599, EPI_ISL_884608, EPI_ISL_884629, EPI_ISL_884631, EPI_ISL_884669, EPI_ISL_884714, EPI_ISL_884722, EPI_ISL_884751, EPI_ISL_884765, EPI_ISL_884784 |                                                                                                 |                                                                                                 |                                                                                                                                                                                                                                                                                                                                                                                                                                                                                                                                                                                                                                                                                                                                                                                   |
| see above                                                                                                                                                                      | Respiratory Viruses Branch, Centers for Disease Control and Prevention                          | Respiratory Viruses Branch, Centers for Disease Control and Prevention                          | Cook,P.W., Batra,D., Rambo-Martin,B.L., de Feo,E., Antico,J., Tran,C., Tolentino,M., Wickline,S., Gietzen,K., Sickler,B., Liu,J., Allen,E., Febbo,P., Galloway,S., Washington,N.L., White,S., Levan,G., Barret,K.S., Cirulli,E., Boize,A., Ascencio,A., Rivera-Garcia,C., Cho,R., Nguyen,J., Wang,S., Ramirez,J., Cassens,T., Sandoval,E., Isaksson,M., Lee,W., Becker,D., Laurent,M., Lu,J., Paden,C.R., Tong,S., MacCannell,D.                                                                                                                                                                                                                                                                                                                                                  |
| EPI_ISL_885153, EPI_ISL_885154                                                                                                                                                 | National Institute of Infectious Diseases-Prof. Dr. Matei Bals Molecular Diagnostics Laboratory | National Institute of Infectious Diseases-Prof. Dr. Matei Bals Molecular Diagnostics Laboratory | Leontina Banica, Marius Surleac, Corina Casangiu, Petre Milu, Andreea Tudor, Simona Paraschiv, Dan Otelea                                                                                                                                                                                                                                                                                                                                                                                                                                                                                                                                                                                                                                                                         |
| EPI_ISL_885221, EPI_ISL_885361, EPI_ISL_885627, EPI_ISL_885863, EPI_ISL_885880                                                                                                 | Lighthouse Lab in Alderley Park                                                                 | Wellcome Sanger Institute for the COVID-19 Genomics UK (COG-UK) Consortium                      | Jacquelyn Wynn, Mairead Hyland, The Lighthouse Lab in Alderley Park and Alex Alderton, Roberto Amato, Sonia Goncalves, Ewan Harrison, David K. Jackson, Ian Johnston, Dominic Kwiatkowski, Cordelia Langford, John Sillitoe on behalf of the Wellcome Sanger Institute COVID-19 Surveillance Team                                                                                                                                                                                                                                                                                                                                                                                                                                                                                 |
| EPI_ISL_888903                                                                                                                                                                 | Michigan Department of Health and Human Services, Bureau of Laboratories                        | Michigan Department of Health and Human Services, Bureau of Laboratories                        | Blankenship HM, Riner D, Soehlnen MK                                                                                                                                                                                                                                                                                                                                                                                                                                                                                                                                                                                                                                                                                                                                              |
| EPI_ISL_889440                                                                                                                                                                 | Wyoming Public Health Laboratory                                                                | Wyoming Public Health Laboratory                                                                | Noah Hull, Taylor Fearing, Lynette Gumbleton, Channing Weber, Ashley Norberg, Bailey Bowcutt, and Wanda Manley                                                                                                                                                                                                                                                                                                                                                                                                                                                                                                                                                                                                                                                                    |
| EPI_ISL_890235                                                                                                                                                                 | Respiratory Viruses Branch, Centers for Disease Control and Prevention                          | Centers for Disease Control and Prevention                                                      | Tao,Y., Li,Y., Zhang,J., Queen,K., Uehara,A., Cook,P., Paden,C.R., Wang,H. and Tong,S.                                                                                                                                                                                                                                                                                                                                                                                                                                                                                                                                                                                                                                                                                            |
| EPI_ISL_890237                                                                                                                                                                 | Virology, International Centre for Diarrhoeal Disease Research, Bangladesh (ICDDR,B)            | International Centre for Diarrhoeal Disease Research (ICDDR,B)                                  | Hossain,M.E., Rahman,M.M., Sumiya,M.K., Alam,M.S., Karim,M.Y.,Hoque,A.F., Rahman,M.Z. and Rahman,M.                                                                                                                                                                                                                                                                                                                                                                                                                                                                                                                                                                                                                                                                               |
| EPI_ISL_891059                                                                                                                                                                 | FidaLab                                                                                         | Seattle Flu Study                                                                               | Deborah A. Nickerson, Chris D. Frazar, Jover Lee, Benjamin Pelle, Erica Ryke, Matthew Richardson, Amanda Adler, Elisabeth Brandstetter, Peter D. Han, Kairsten Fay, Misja Ilcin, Kirsten Lacombe, Thomas R. Sibley, Melissa Truong, Caitlin R. Wolf, Romesh Gautom, Geoff Melly, Brian Hiatt, Philip Dykema, Scott Lindquist, Michael Boeckh, Janet A. Englund, Michael Famulare, Barry R. Lutz, Mark J. Rieder, Lea M. Starita, Matthew Thompson, Helen Y. Chu, Jay Shendure, Trevor Bedford                                                                                                                                                                                                                                                                                     |
| EPI_ISL_891139, EPI_ISL_891140                                                                                                                                                 | The Jackson Laboratory                                                                          | The Jackson Laboratory                                                                          | Lloyd M, Sanderson B, Srivastava A, Maurya R, Renzette N, Omerza G, Kelly K, Li L, Wei C L, Adams M                                                                                                                                                                                                                                                                                                                                                                                                                                                                                                                                                                                                                                                                               |
| EPI_ISL_891816, EPI_ISL_891896                                                                                                                                                 | Lighthouse Lab in Cambridge                                                                     | Wellcome Sanger Institute for the COVID-19 Genomics UK (COG-UK) Consortium                      | Rob Howes, The Lighthouse Lab in Cambridge and Alex Alderton, Roberto Amato, Sonia Goncalves, Ewan Harrison, David K. Jackson, Ian Johnston, Dominic Kwiatkowski, Cordelia Langford, John Sillitoe on behalf of the Wellcome Sanger Institute COVID-19 Surveillance Team                                                                                                                                                                                                                                                                                                                                                                                                                                                                                                          |
| EPI_ISL_894248, EPI_ISL_894253,                                                                                                                                                | Ministry of Health Turkey                                                                       | Ministry of Health Turkey                                                                       | Fatma Bayraktar, Yasemin Cogun, Süleyman Yalcin, Aye Baak Alta, Gülay Korukluolu                                                                                                                                                                                                                                                                                                                                                                                                                                                                                                                                                                                                                                                                                                  |

|                                                                                                |                                                                                                                                                                                                          |                                                                                          |                                                                                                                                                                                                                                                                                                                                                                                                                                |
|------------------------------------------------------------------------------------------------|----------------------------------------------------------------------------------------------------------------------------------------------------------------------------------------------------------|------------------------------------------------------------------------------------------|--------------------------------------------------------------------------------------------------------------------------------------------------------------------------------------------------------------------------------------------------------------------------------------------------------------------------------------------------------------------------------------------------------------------------------|
| EPI_ISL_894254, EPI_ISL_894262, EPI_ISL_894263, EPI_ISL_894270, EPI_ISL_894272, EPI_ISL_894274 |                                                                                                                                                                                                          |                                                                                          |                                                                                                                                                                                                                                                                                                                                                                                                                                |
| EPI_ISL_902753                                                                                 | Azienda Ospedaliera San Camillo Forlanini                                                                                                                                                                | INMI Lazzaro Spallanzani IRCCS                                                           | C.E.M Gruber, B Bartolini, E Giombini, M Rueca, O Butera, F Messina, D.Gallone, G Parisi, A Di Caro, MR Capobianchi                                                                                                                                                                                                                                                                                                            |
| EPI_ISL_902926                                                                                 | SC (UCO) Igiene e Sanità Pubblica (funzione integrata con SC Microbiologia e Virologia) e Laboratory of Molecular Virology of the International Centre for Genetic Engineering and Biotechnology (ICGEB) | ARGO Laboratorio Genomica ed Epigenomica                                                 | Licastro D, Dal Monego S, Degasperri M, Marcello A, D'Agaro P                                                                                                                                                                                                                                                                                                                                                                  |
| EPI_ISL_903383                                                                                 | MOH - Jaber Al-Ahmad Hospital (Innovation Research Laboratory)                                                                                                                                           | MOH - Jaber Al-Ahmad Hospital (Innovation Research Laboratory)                           | Salman Al-Sabah , Mohammad Alghounaim                                                                                                                                                                                                                                                                                                                                                                                          |
| EPI_ISL_903986                                                                                 | Institute of Virology, Biomedical Research Center of the Slovak Academy of Sciences, Bratislava                                                                                                          | Faculty of Natural Sciences, Comenius University, Bratislava                             | Broa Brejovik, Viktória abanová, Kristína Boršová, Viktória Hodorová, Sabina Fumaová Havlíková, Juraj Kopáek, Martina Liková, ubomira Lukáiková, Martina Nebáhová, Monika Sláviková, Tomáš Vina, Jozef Nosek, Boris Klempa                                                                                                                                                                                                     |
| EPI_ISL_905751, EPI_ISL_905756, EPI_ISL_905761                                                 | National Institute of Public Health - National Institute of Hygiene                                                                                                                                      | National Institute of Public Health - National Institute of Hygiene                      | Wokowicz Tomasz, Zacharczuk Katarzyna                                                                                                                                                                                                                                                                                                                                                                                          |
| EPI_ISL_906045                                                                                 | OHSU Lab Services Molecular Microbiology Lab                                                                                                                                                             | Oregon SARS-CoV-2 Genome Sequencing Center                                               | Brendan L. O'Connell, Sally Grindstaff, Kayla Carter, Ruth V. Nichols, Alec J. Hirsch, Donna Hansel, Guang Fan, Xuan, Qin, Daniel N. Streblov, William B. Messer, Andrew C. Adey, Benjamin N. Bimber, Brian J. O'Roak                                                                                                                                                                                                          |
| EPI_ISL_906053                                                                                 | Tilia Laboratories s.r.o.                                                                                                                                                                                | Tilia Laboratories s.r.o.                                                                | Sona Pekova, MD, PhD.                                                                                                                                                                                                                                                                                                                                                                                                          |
| EPI_ISL_906074                                                                                 | Searom Laboratorio Diagnostico                                                                                                                                                                           | Instituto Adolfo Lutz, Interdisciplinary Procedures Center, Strategic Laboratory         | Claudio Tavares Sacchi, Claudia Regina Gonçalves, Erica Valessa Ramos Gomes, Karoline Rodrigues Campos                                                                                                                                                                                                                                                                                                                         |
| EPI_ISL_906078                                                                                 | Hospital Carlos Chagas                                                                                                                                                                                   | Instituto Adolfo Lutz, Interdisciplinary Procedures Center, Strategic Laboratory         | Claudio Tavares Sacchi, Claudia Regina Gonçalves, Erica Valessa Ramos Gomes, Karoline Rodrigues Campos                                                                                                                                                                                                                                                                                                                         |
| EPI_ISL_906851                                                                                 | Respiratory Viruses Branch, Centers for Disease Control and Prevention                                                                                                                                   | Respiratory Viruses Branch, Centers for Disease Control and Prevention                   | Tao,Y., Li,Y., Zhang,J., Queen,K., Uehara,A., Cook,P., Paden,C.R., Wang,H., Tong,S.                                                                                                                                                                                                                                                                                                                                            |
| EPI_ISL_907129                                                                                 | Lighthouse Lab in Glasgow                                                                                                                                                                                | Wellcome Sanger Institute for the COVID-19 Genomics UK (COG-UK) Consortium               | Harper VanSteenhouse, Yumi Kasai, David Gray, Carol Clugston, Anna Dominiczak and Alex Alderton, Roberto Amato, Sonia Goncalves, Ewan Harrison, David K. Jackson, Ian Johnston, Dominic Kwiatkowski, Cordelia Langford, John Sillitoe on behalf of the Wellcome Sanger Institute COVID-19 Surveillance Team                                                                                                                    |
| EPI_ISL_907168                                                                                 | Lighthouse Lab in Cambridge                                                                                                                                                                              | Wellcome Sanger Institute for the COVID-19 Genomics UK (COG-UK) Consortium               | Rob Howes, The Lighthouse Lab in Cambridge and Alex Alderton, Roberto Amato, Sonia Goncalves, Ewan Harrison, David K. Jackson, Ian Johnston, Dominic Kwiatkowski, Cordelia Langford, John Sillitoe on behalf of the Wellcome Sanger Institute COVID-19 Surveillance Team                                                                                                                                                       |
| EPI_ISL_907627, EPI_ISL_907814                                                                 | Lighthouse Lab in Glasgow                                                                                                                                                                                | Wellcome Sanger Institute for the COVID-19 Genomics UK (COG-UK) Consortium               | Harper VanSteenhouse, Yumi Kasai, David Gray, Carol Clugston, Anna Dominiczak and Alex Alderton, Roberto Amato, Sonia Goncalves, Ewan Harrison, David K. Jackson, Ian Johnston, Dominic Kwiatkowski, Cordelia Langford, John Sillitoe on behalf of the Wellcome Sanger Institute COVID-19 Surveillance Team                                                                                                                    |
| EPI_ISL_908541                                                                                 | Lighthouse Lab in Alderley Park                                                                                                                                                                          | Wellcome Sanger Institute for the COVID-19 Genomics UK (COG-UK) Consortium               | Jacquelyn Wynn, Mairead Hyland, The Lighthouse Lab in Alderley Park and Alex Alderton, Roberto Amato, Sonia Goncalves, Ewan Harrison, David K. Jackson, Ian Johnston, Dominic Kwiatkowski, Cordelia Langford, John Sillitoe on behalf of the Wellcome Sanger Institute COVID-19 Surveillance Team                                                                                                                              |
| EPI_ISL_908712                                                                                 | Lighthouse Lab in Cambridge                                                                                                                                                                              | Wellcome Sanger Institute for the COVID-19 Genomics UK (COG-UK) Consortium               | Rob Howes, The Lighthouse Lab in Cambridge and Alex Alderton, Roberto Amato, Sonia Goncalves, Ewan Harrison, David K. Jackson, Ian Johnston, Dominic Kwiatkowski, Cordelia Langford, John Sillitoe on behalf of the Wellcome Sanger Institute COVID-19 Surveillance Team                                                                                                                                                       |
| EPI_ISL_909113                                                                                 | Lighthouse Lab in Glasgow                                                                                                                                                                                | Wellcome Sanger Institute for the COVID-19 Genomics UK (COG-UK) Consortium               | Harper VanSteenhouse, Yumi Kasai, David Gray, Carol Clugston, Anna Dominiczak and Alex Alderton, Roberto Amato, Sonia Goncalves, Ewan Harrison, David K. Jackson, Ian Johnston, Dominic Kwiatkowski, Cordelia Langford, John Sillitoe on behalf of the Wellcome Sanger Institute COVID-19 Surveillance Team                                                                                                                    |
| EPI_ISL_909180                                                                                 | Lighthouse Lab in Cambridge                                                                                                                                                                              | Wellcome Sanger Institute for the COVID-19 Genomics UK (COG-UK) Consortium               | Rob Howes, The Lighthouse Lab in Cambridge and Alex Alderton, Roberto Amato, Sonia Goncalves, Ewan Harrison, David K. Jackson, Ian Johnston, Dominic Kwiatkowski, Cordelia Langford, John Sillitoe on behalf of the Wellcome Sanger Institute COVID-19 Surveillance Team                                                                                                                                                       |
| EPI_ISL_909362                                                                                 | Lighthouse Lab in Milton Keynes                                                                                                                                                                          | Wellcome Sanger Institute for the COVID-19 Genomics UK (COG-UK) Consortium               | The Lighthouse Lab in Milton Keynes and Alex Alderton, Roberto Amato, Sonia Goncalves, Ewan Harrison, David K. Jackson, Ian Johnston, Dominic Kwiatkowski, Cordelia Langford, John Sillitoe on behalf of the Wellcome Sanger Institute COVID-19 Surveillance Team                                                                                                                                                              |
| EPI_ISL_909670                                                                                 | Labo Analyses med                                                                                                                                                                                        | National Reference Center for Viruses of Respiratory Infections, Institut Pasteur, Paris | Marion Barbet, Sylvie Behillil, Méline Bizard, Angela Brisebarre, Camille Capel, Etienne Simon-Lorière, Vincent Enouf, Maud Vanpeene, Sylvie van der Werf, Amzalag Jonas                                                                                                                                                                                                                                                       |
| EPI_ISL_909949                                                                                 | CUSL/UCLouvain COVID testing federal platform                                                                                                                                                            | UCLouvain/IREC/MBLG                                                                      | Jean Ruelle, Lysa Pinsmayer, Benoit Kabamba Mukadi                                                                                                                                                                                                                                                                                                                                                                             |
| EPI_ISL_911287, EPI_ISL_911316                                                                 | Servicio de Microbiología, Hospital Universitario Son Espases                                                                                                                                            | SeqCOVID-SPAIN consortium/IBV(CSIC)                                                      | Carla López-Causapé, Jordi Reina, Antonio Oliver and SeqCOVID-SPAIN consortium                                                                                                                                                                                                                                                                                                                                                 |
| EPI_ISL_911378, EPI_ISL_911382                                                                 | University of Michigan Clinical Microbiology Laboratory                                                                                                                                                  | Lauring Lab, University of Michigan, Department of Microbiology and Immunology           | Valesano                                                                                                                                                                                                                                                                                                                                                                                                                       |
| EPI_ISL_911524                                                                                 | Microbiology and Virology Unit, Florence Careggi University Hospital                                                                                                                                     | Microbiology and Virology Unit, Florence Careggi University Hospital                     | Vincenzo Di Pilato, Marco Coppi, Fabio Morecchiato, Noemi Aiezza, Ilaria Baccani, Alberto Antonelli, Emanuele Gori, Gian Maria Rossolini                                                                                                                                                                                                                                                                                       |
| EPI_ISL_911967                                                                                 | LabCorp                                                                                                                                                                                                  | Wyoming Public Health Laboratory                                                         | Noah Hull, Taylor Fearing, Lynette Gumbleton, Channing Weber, Ashley Norberg, Bailey Bowcutt, and Wanda Manley                                                                                                                                                                                                                                                                                                                 |
| EPI_ISL_912160                                                                                 | Yale Clinical Virology Lab                                                                                                                                                                               | Grubaugh Lab - Yale School of Public Health                                              | Tara Alpert, Joseph Fauver, Anderson Brito, Mallery Breban, Anne Wylie, Chantal Vogels, Mary Petrone, Annie Watkins, Chaney Kalinich, Isabel Ott, Nathan Grubaugh                                                                                                                                                                                                                                                              |
| EPI_ISL_912171, EPI_ISL_912172, EPI_ISL_912173, EPI_ISL_912174, EPI_ISL_912176, EPI_ISL_912178 | Tempus                                                                                                                                                                                                   | Grubaugh Lab - Yale School of Public Health                                              | Tara Alpert, Joseph Fauver, Anderson Brito, Mallery Breban, Anne Wylie, Chantal Vogels, Mary Petrone, Annie Watkins, Chaney Kalinich, Isabel Ott, Nathan Grubaugh                                                                                                                                                                                                                                                              |
| EPI_ISL_912179, EPI_ISL_912180, EPI_ISL_912181, EPI_ISL_912182, EPI_ISL_912183, EPI_ISL_912184 | Yale Pathology Lab                                                                                                                                                                                       | Grubaugh Lab - Yale School of Public Health                                              | Tara Alpert, Joseph Fauver, Chen Liu, Pei Hui, Jianhui Wang, Susan Bell and Han Zhou, Anderson Brito, Mallery Breban, Anne Wylie, Chantal Vogels, Mary Petrone, Chaney Kalinich, Isabel Ott, Arnau Casanovas, Catherine Muenker, Adam Moore, Alice Lu, Maria Tokuyama, Patrick Wong, Peiwen Lu, Saad Omer, Richard Martinello, Allison Nelson, Shelli Farhadian, Akiko Iwasaki, Charlese Dela Cruz, Albert Ko, Nathan Grubaugh |
| EPI_ISL_912185                                                                                 | Connecticut Department of Health                                                                                                                                                                         | Grubaugh Lab - Yale School of Public Health                                              | Tara Alpert, Joseph Fauver, Anderson Brito, Mallery Breban, Anne Wylie, Chantal Vogels, Mary Petrone, Annie Watkins, Chaney Kalinich, Isabel Ott, Nathan Grubaugh                                                                                                                                                                                                                                                              |
| EPI_ISL_912322, EPI_ISL_912340                                                                 | Hospital General Universitario Gregorio Marañón                                                                                                                                                          | SeqCOVID-SPAIN consortium / IBV (CSIC)                                                   | Darío García de Viedma, Laura Pérez-Lago, Pedro J Sola-Campoy, Sergio Buenestado-Serrano, Marta Herranz, Victor Manuel de la Cueva, Julia Suárez, Pilar Catalán, Patricia Muñoz and SeqCOVID-SPAIN consortium                                                                                                                                                                                                                  |
| EPI_ISL_912558                                                                                 | Centre Hospitalier de Gisors Route de Rouen                                                                                                                                                              | National Reference Center for Viruses of Respiratory Infections, Institut Pasteur, Paris | Marion Barbet, Sylvie Behillil, Méline Bizard, Angela Brisebarre, Camille Capel, Etienne Simon-Lorière, Vincent Enouf, Maud Vanpeene, Sylvie van der Werf                                                                                                                                                                                                                                                                      |
| EPI_ISL_912568                                                                                 | Laboratoire de Virologie du CHU de Lille Bâtiment Paul Boulanger                                                                                                                                         | National Reference Center for Viruses of Respiratory Infections, Institut Pasteur, Paris | Marion Barbet, Sylvie Behillil, Méline Bizard, Angela Brisebarre, Camille Capel, Etienne Simon-Lorière, Vincent Enouf, Maud Vanpeene, Sylvie van der Werf, Guignon Aurélie                                                                                                                                                                                                                                                     |
| EPI_ISL_912573                                                                                 | C.H.R. d'Orléans - Hôpital de la Source                                                                                                                                                                  | National Reference Center for Viruses of Respiratory Infections, Institut Pasteur, Paris | Marion Barbet, Sylvie Behillil, Méline Bizard, Angela Brisebarre, Camille Capel, Etienne Simon-Lorière, Vincent Enouf, Maud Vanpeene, Sylvie van der Werf, Guinard Jérôme                                                                                                                                                                                                                                                      |
| EPI_ISL_912576                                                                                 | Laboratoire de Virologie du CHU de Lille Bâtiment Paul Boulanger                                                                                                                                         | National Reference Center for Viruses of Respiratory Infections, Institut Pasteur, Paris | Marion Barbet, Sylvie Behillil, Méline Bizard, Angela Brisebarre, Camille Capel, Etienne Simon-Lorière, Vincent Enouf, Maud Vanpeene, Sylvie van der Werf, Guignon Aurélie                                                                                                                                                                                                                                                     |

|                                                |                                                                                                                                  |                                                                                                                                            |                                                                                                                                                                                                                                                                                                                                                                       |
|------------------------------------------------|----------------------------------------------------------------------------------------------------------------------------------|--------------------------------------------------------------------------------------------------------------------------------------------|-----------------------------------------------------------------------------------------------------------------------------------------------------------------------------------------------------------------------------------------------------------------------------------------------------------------------------------------------------------------------|
| EPI_ISL_912673, EPI_ISL_912835                 | Hôpital Henri Mondor                                                                                                             | Department of Virology, Henri Mondor University Hospital, Assistance Publique Hôpitaux de Paris, Université Paris-Est Créteil, INSERM U955 | Christophe Rodriguez, Slim Fourati, Vanessa Demontant, Guillaume Gricourt, Melissa N'Debi, Alexandre Soulier, Elisabeth Trawinski, Jean-Michel Pawlotsky                                                                                                                                                                                                              |
| EPI_ISL_912907                                 | CH.INTERCOMMUNAL DE CRETEIL                                                                                                      | Department of Virology, Henri Mondor University Hospital, Assistance Publique Hôpitaux de Paris, Université Paris-Est Créteil, INSERM U955 | Christophe Rodriguez, Slim Fourati, Vanessa Demontant, Guillaume Gricourt, Melissa N'Debi, Alexandre Soulier, Elisabeth Trawinski, Jean-Michel Pawlotsky                                                                                                                                                                                                              |
| EPI_ISL_913031                                 | Hospital los Arcos                                                                                                               | Instituto de Salud Carlos III                                                                                                              | Iglesias-Caballero, M. Camarero, S. Sandonis,V. Vázquez, S. Pozo, F. Casas, I. Jiménez, P. Zaballos, A. Monzón, S. Varona, S. Cuesta, I. Cámara, M.                                                                                                                                                                                                                   |
| EPI_ISL_913033                                 | Hospital San Pedro de Alcántara                                                                                                  | Instituto de Salud Carlos III                                                                                                              | Iglesias-Caballero, M. Camarero, S. Sandonis,V. Vázquez, S. Pozo, F. Casas, I. Jiménez, P. Zaballos, A. Monzón, S. Varona, S. Cuesta, I. Rodríguez, G.                                                                                                                                                                                                                |
| EPI_ISL_913827                                 | KU Leuven, Rega Institute, Clinical and Epidemiological Virology                                                                 | KU Leuven, Rega Institute, Clinical and Epidemiological Virology                                                                           | Tony Wawina-Bokalanga, Bert Vanmechelen, Joan Marti-Carerras, Piet Maes                                                                                                                                                                                                                                                                                               |
| EPI_ISL_913991                                 | IL Dept. of Public Health Springfield Laboratory                                                                                 | Pathogen Discovery, Respiratory Viruses Branch, Division of Viral Diseases, Centers for Disease Control and Prevention                     | Ying Tao, Yan Li, Jing Zhang, Krista Queen, Anna Uehara, Peter Cook, Clinton R. Paden, Haibin Wang, Suxiang Tong                                                                                                                                                                                                                                                      |
| EPI_ISL_913993                                 | TN Division of Laboratory Services                                                                                               | Pathogen Discovery, Respiratory Viruses Branch, Division of Viral Diseases, Centers for Disease Control and Prevention                     | Ying Tao, Yan Li, Jing Zhang, Krista Queen, Anna Uehara, Peter Cook, Clinton R. Paden, Haibin Wang, Suxiang Tong                                                                                                                                                                                                                                                      |
| EPI_ISL_913996                                 | IL Dept. of Public Health Springfield Laboratory                                                                                 | Pathogen Discovery, Respiratory Viruses Branch, Division of Viral Diseases, Centers for Disease Control and Prevention                     | Ying Tao, Yan Li, Jing Zhang, Krista Queen, Anna Uehara, Peter Cook, Clinton R. Paden, Haibin Wang, Suxiang Tong                                                                                                                                                                                                                                                      |
| EPI_ISL_914030, EPI_ISL_914034                 | IL Department of Public Health Springfield Laboratory                                                                            | Pathogen Discovery, Respiratory Viruses Branch, Division of Viral Diseases, Centers for Disease Control and Prevention                     | Ying Tao, Yan Li, Jing Zhang, Krista Queen, Anna Uehara, Peter Cook, Clinton R. Paden, Haibin Wang, Suxiang Tong                                                                                                                                                                                                                                                      |
| EPI_ISL_914035                                 | IN State Department of Health Laboratory Service                                                                                 | Pathogen Discovery, Respiratory Viruses Branch, Division of Viral Diseases, Centers for Disease Control and Prevention                     | Ying Tao, Yan Li, Jing Zhang, Krista Queen, Anna Uehara, Peter Cook, Clinton R. Paden, Haibin Wang, Suxiang Tong                                                                                                                                                                                                                                                      |
| EPI_ISL_914643                                 | Santa Clara County Public Health Laboratory                                                                                      | Santa Clara County Public Health Laboratory                                                                                                | Santa Clara County Public Health Department                                                                                                                                                                                                                                                                                                                           |
| EPI_ISL_916715, EPI_ISL_916876, EPI_ISL_917311 | Lighthouse Lab in Alderley Park                                                                                                  | Wellcome Sanger Institute for the COVID-19 Genomics UK (COG-UK) Consortium                                                                 | Jacquelyn Wynn, Mairead Hyland, The Lighthouse Lab in Alderley Park and Alex Alderton, Roberto Amato, Sonia Goncalves, Ewan Harrison, David K. Jackson, Ian Johnston, Dominic Kwiatkowski, Cordelia Langford, John Sillitoe on behalf of the Wellcome Sanger Institute COVID-19 Surveillance Team                                                                     |
| EPI_ISL_918191, EPI_ISL_918192                 | Innovative Genomics Institute, UC Berkeley                                                                                       | Innovative Genomics Institute, UC Berkeley                                                                                                 | Stacia Wyman, Haridha Shivram, Phil Frankino, Liana Lareau, Shana McDevitt, Justin Choi                                                                                                                                                                                                                                                                               |
| EPI_ISL_918264                                 | SIESP CHIETI-DRIVE IN CHIETI                                                                                                     | Istituto Zooprofilattico Sperimentale dell'Abruzzo e Molise "G. Caporale"                                                                  | Lorusso A, Marcacci M, Di Domenico M, Ancora M, Curini V, Mangone I, Rinaldi A, Scialabba S, Di Pasquale A, Cammà C, Puglia I, Calistri P, Savini G                                                                                                                                                                                                                   |
| EPI_ISL_918267                                 | SIESP CHIETI - DRIVE IN CHIETI                                                                                                   | Istituto Zooprofilattico Sperimentale dell'Abruzzo e Molise "G. Caporale"                                                                  | Lorusso A, Marcacci M, Di Domenico M, Ancora M, Curini V, Mangone I, Rinaldi A, Scialabba S, Di Pasquale A, Cammà C, Puglia I, Calistri P, Savini G                                                                                                                                                                                                                   |
| EPI_ISL_918270                                 | SIESP CHIETI - DRIVE IN LANCIANO                                                                                                 | Istituto Zooprofilattico Sperimentale dell'Abruzzo e Molise "G. Caporale"                                                                  | Lorusso A, Marcacci M, Di Domenico M, Ancora M, Curini V, Mangone I, Rinaldi A, Scialabba S, Di Pasquale A, Cammà C, Puglia I, Calistri P, Savini G                                                                                                                                                                                                                   |
| EPI_ISL_918493, EPI_ISL_918495                 | Florida Bureau of Public Health Laboratories                                                                                     | Florida Bureau of Public Health Laboratories                                                                                               | Sarah Schmedes, Jason Blanton                                                                                                                                                                                                                                                                                                                                         |
| EPI_ISL_919830                                 | Barts Health NHS Trust                                                                                                           | COVID-19 Genomics UK (COG-UK) Consortium                                                                                                   | CUTINO-MOGUEL, Maria-Teresa; HARRINGTON, David; OWOYEMI, Dola; KULASEGARAN-SHYLINI, Raghavendran; BROAD, Claire; KELE, Beatrix                                                                                                                                                                                                                                        |
| EPI_ISL_919954                                 | University College London, Great Ormond Street Hospital for Children NHS Foundation Trust, Imperial College Healthcare NHS Trust | COVID-19 Genomics UK (COG-UK) Consortium                                                                                                   | Sergi Castellano, Rachel Williams, Mark Kristiansen, Paola Resende Silva, Sunando Roy, Tony Brooks, Helena Tutill, Paola Niola, Patricia Dyal, Charlotte Williams, Leysa Forrest, Yasmin Panchbhaya, Jacqueline Findlay, Samuel Weeks, Julianne Brown, Kathryn Harris, Paul Randell, James Price, Alison Holmes, Judith Breuer                                        |
| EPI_ISL_920751                                 | University College London Hospital                                                                                               | COVID-19 Genomics UK (COG-UK) Consortium                                                                                                   | Judith Heaney, Matthew Byott, Catherine Houlihan, Dan Frampton, Stuart Kirk, Moira Spyer and Eleni Nastouli                                                                                                                                                                                                                                                           |
| EPI_ISL_922273                                 | Oxford Viromics, NDM, University of Oxford; Oxford University Hospitals; Basingstoke and North Hampshire Hospital                | COVID-19 Genomics UK (COG-UK) Consortium                                                                                                   | Tanya Golubchik, David Bonsall, George Macintyre, Amy Trebes, Mariateresa de Cesare, Catrin Moore, Alex Mobbs, Anita Justice, Robert Shaw, Monique Andersson, Timothy Peto, Emma Wise, Nathan Moore, Jessica Lynch, Nick Cortes, Matilde Mori, Stephen Kidd, David Buck, John Todd, Christophe Fraser                                                                 |
| EPI_ISL_922635                                 | Wales Specialist Virology Centre Sequencing lab: Pathogen Genomics Unit                                                          | Public Health Wales Microbiology Cardiff Wales Specialist Virology Centre                                                                  | Catherine Moore, Johnathan Evans, Laura Gifford, Malorie Perry, Simon Cottrell, Angela Marchbank, Alec Birchley, Alexander Adams, Amy Gaskin, Bree Gatca-Wilcox, Jason Coombes, Joel Southgate, Lauren Gilbert, Lee Graham, Nicole Pacchiari, Sara Kumziene-Summerhayes, Sarah Taylor, Sophie Jones, Sara Rey, Matthew Bull, Joanne Watkins, Sally Corden, Tom Connor |
| EPI_ISL_923691, EPI_ISL_923710, EPI_ISL_923762 | Department of Pathology, University of Cambridge                                                                                 | COVID-19 Genomics UK (COG-UK) Consortium                                                                                                   | Aminu S. Jahun, Yasmin Chaudhry, Iliana Georgana, Myra Hosmillo, Rhys Izu, Martin D. Curran, Surendra Parmar, Ian Goodfellow                                                                                                                                                                                                                                          |
| EPI_ISL_924712                                 | Bioinformatics and Biostatistics Lab, Advanced Sequencing Facility                                                               | COVID-19 Genomics UK (COG-UK) Consortium                                                                                                   | Aengus Stewart,Jerome Nicod,Chelsea Sawyer,Laura Cubitt,Harshil Patel,Margaret Crawford                                                                                                                                                                                                                                                                               |
| EPI_ISL_930587                                 | Synlab                                                                                                                           | GIGA Medical Genomics                                                                                                                      | Keith Durkin, Maria Artesi, Sébastien Bontems, Raphaël Boreux, Bouchra Boujemla, Cécile Meex, Pierrette Melin, Marie-Pierre Hayette, Vincent Bours                                                                                                                                                                                                                    |
| EPI_ISL_932739                                 | Lighthouse Lab in Cambridge                                                                                                      | Wellcome Sanger Institute for the COVID-19 Genomics UK (COG-UK) Consortium                                                                 | Rob Howes, The Lighthouse Lab in Cambridge and Alex Alderton, Roberto Amato, Sonia Goncalves, Ewan Harrison, David K. Jackson, Ian Johnston, Dominic Kwiatkowski, Cordelia Langford, John Sillitoe on behalf of the Wellcome Sanger Institute COVID-19 Surveillance Team                                                                                              |
| EPI_ISL_932896                                 | Lighthouse Lab in Glasgow                                                                                                        | Wellcome Sanger Institute for the COVID-19 Genomics UK (COG-UK) Consortium                                                                 | Harper VanSteenhouse, Yumi Kasai, David Gray, Carol Clugston, Anna Dominiczak and Alex Alderton, Roberto Amato, Sonia Goncalves, Ewan Harrison, David K. Jackson, Ian Johnston, Dominic Kwiatkowski, Cordelia Langford, John Sillitoe on behalf of the Wellcome Sanger Institute COVID-19 Surveillance Team                                                           |
| EPI_ISL_933256                                 | Lighthouse Lab in Cambridge                                                                                                      | Wellcome Sanger Institute for the COVID-19 Genomics UK (COG-UK) Consortium                                                                 | Rob Howes, The Lighthouse Lab in Cambridge and Alex Alderton, Roberto Amato, Sonia Goncalves, Ewan Harrison, David K. Jackson, Ian Johnston, Dominic Kwiatkowski, Cordelia Langford, John Sillitoe on behalf of the Wellcome Sanger Institute COVID-19 Surveillance Team                                                                                              |
| EPI_ISL_933718                                 | Servicio de Microbiología Hospital Ramón y Cajal                                                                                 | Servicio de Microbiología Hospital Ramón y Cajal                                                                                           | José M Gonzalez-Alba, Concepción Rodríguez, Melanie Abreu, Laura Martínez, Val F Lanza, Luz Leticia Olavarieta, Rafael Cantón, JC Galán                                                                                                                                                                                                                               |
| EPI_ISL_933736, EPI_ISL_933737                 | DPHL                                                                                                                             | Delaware Public Health Lab                                                                                                                 | Gregory Hovan                                                                                                                                                                                                                                                                                                                                                         |
| EPI_ISL_933740, EPI_ISL_933774                 | Servicio de Microbiología Hospital Ramón y Cajal                                                                                 | Servicio de Microbiología Hospital Ramón y Cajal                                                                                           | José M Gonzalez-Alba, Concepción Rodríguez, Melanie Abreu, Laura Martínez, Val F Lanza, Luz Leticia Olavarieta, Rafael Cantón, JC Galán                                                                                                                                                                                                                               |
| EPI_ISL_933779                                 | Victorian Infectious Diseases Reference Laboratory (VIDRL)                                                                       | VIDRL and MDU-PHL                                                                                                                          | Caly L., Seemann T., Sait, M.L., Druce J., Sherry, N.L.                                                                                                                                                                                                                                                                                                               |
| EPI_ISL_934424                                 | Institute for Medical Research, Infectious Disease Research Centre, National Institutes of Health, Ministry of Health Malaysia   | Institute for Medical Research, Infectious Disease Research Centre, National Institutes of Health, Ministry of Health Malaysia             | Suppiah J, Kamel K, Azizan MA, Thayan R                                                                                                                                                                                                                                                                                                                               |
| EPI_ISL_934442, EPI_ISL_934467, EPI_ISL_934628 | Austrian Agency for Health and Food Safety (AGES)                                                                                | Bergthaler laboratory, CeMM Research Center for Molecular Medicine of the Austrian Academy of Sciences                                     | Lukas Endler, Anna Schedl, Thomas Penz, Benedikt Agerer, Maelle Le Moing, Michael Schuster, Bekir Erguner, Jan Laine, Martin Senekowitsch, Christoph Bock, Andreas Bergthaler                                                                                                                                                                                         |
| EPI_ISL_935046                                 | Bioblab Diagnostic Laboratories                                                                                                  | Princess Haya Biotechnology Center/ Jordan University of Science & Technology                                                              | Saied Jaradat, Hazem Haddad, Areej Alquran, Maha Karam, Shereen Issa,Suha Hasan, Amid Abdelnour, Issa Abu-Dayyeh, Mustafa Ababneh, Moh'D Al-Zghoul, Mohammad Alboom                                                                                                                                                                                                   |
| EPI_ISL_935060, EPI_ISL_935073                 | Ministry of Health Turkey                                                                                                        | Ministry of Health Turkey                                                                                                                  | Fatma Bayrakdar, Yasemin Cogun, Süleyman Yalcin, Aye Baak Alta, Gülay Korukluolu                                                                                                                                                                                                                                                                                      |
| EPI_ISL_935156                                 | SIESP CHIETI                                                                                                                     | Istituto Zooprofilattico Sperimentale dell'Abruzzo e Molise "G. Caporale"                                                                  | Lorusso A, Marcacci M, Di Domenico M, Ancora M, Curini V, Mangone I, Rinaldi A, Scialabba S, Di Pasquale A, Cammà C, Puglia I, Calistri P, Savini G                                                                                                                                                                                                                   |
| EPI_ISL_935164                                 | SIESP CHIETI-DRIVE IN ORTONA                                                                                                     | Istituto Zooprofilattico Sperimentale dell'Abruzzo e Molise "G. Caporale"                                                                  | Lorusso A, Marcacci M, Di Domenico M, Ancora M, Curini V, Mangone I, Rinaldi A, Scialabba S, Di Pasquale A, Cammà C, Puglia I, Calistri P, Savini G                                                                                                                                                                                                                   |

|                                                                                                                                                                                                                                                                                                |                                                                                                                                                                                                          |                                                                                                                                                     |                                                                                                                                                                                                                                                                                                                                                                                                                                         |
|------------------------------------------------------------------------------------------------------------------------------------------------------------------------------------------------------------------------------------------------------------------------------------------------|----------------------------------------------------------------------------------------------------------------------------------------------------------------------------------------------------------|-----------------------------------------------------------------------------------------------------------------------------------------------------|-----------------------------------------------------------------------------------------------------------------------------------------------------------------------------------------------------------------------------------------------------------------------------------------------------------------------------------------------------------------------------------------------------------------------------------------|
| EPI_ISL_935293                                                                                                                                                                                                                                                                                 | KU Leuven, Rega Institute, Clinical and Epidemiological Virology                                                                                                                                         | KU Leuven, Rega Institute, Clinical and Epidemiological Virology                                                                                    | Tony Wawina-Bokalanga, Bert Vanmechelen, Joan Marti-Carerras, Piet Maes                                                                                                                                                                                                                                                                                                                                                                 |
| EPI_ISL_935527                                                                                                                                                                                                                                                                                 | Labo Analyses Med                                                                                                                                                                                        | National Reference Center for Viruses of Respiratory Infections, Institut Pasteur, Paris                                                            | Marion Barbet, Sylvie Behillil, Méline Bizard, Angela Brisebarre, Camille Capel, Etienne Simon-Lorière, Vincent Enouf, Maud Vanpeene, Sylvie van der Werf, Merah Kader                                                                                                                                                                                                                                                                  |
| EPI_ISL_935533                                                                                                                                                                                                                                                                                 | Labo Analyses Med                                                                                                                                                                                        | National Reference Center for Viruses of Respiratory Infections, Institut Pasteur, Paris                                                            | Marion Barbet, Sylvie Behillil, Méline Bizard, Angela Brisebarre, Camille Capel, Etienne Simon-Lorière, Vincent Enouf, Maud Vanpeene, Sylvie van der Werf, Jacques Alexandra                                                                                                                                                                                                                                                            |
| EPI_ISL_935555                                                                                                                                                                                                                                                                                 | Hopital                                                                                                                                                                                                  | National Reference Center for Viruses of Respiratory Infections, Institut Pasteur, Paris                                                            | Marion Barbet, Sylvie Behillil, Méline Bizard, Angela Brisebarre, Camille Capel, Etienne Simon-Lorière, Vincent Enouf, Maud Vanpeene, Sylvie van der Werf, Goudeau Alain                                                                                                                                                                                                                                                                |
| EPI_ISL_935621                                                                                                                                                                                                                                                                                 | Labo Analyses med                                                                                                                                                                                        | National Reference Center for Viruses of Respiratory Infections, Institut Pasteur, Paris                                                            | Marion Barbet, Sylvie Behillil, Méline Bizard, Angela Brisebarre, Camille Capel, Etienne Simon-Lorière, Vincent Enouf, Maud Vanpeene, Sylvie van der Werf, Amzalag Jonas                                                                                                                                                                                                                                                                |
| EPI_ISL_935643                                                                                                                                                                                                                                                                                 | Labo Analyses Med                                                                                                                                                                                        | National Reference Center for Viruses of Respiratory Infections, Institut Pasteur, Paris                                                            | Marion Barbet, Sylvie Behillil, Méline Bizard, Angela Brisebarre, Camille Capel, Etienne Simon-Lorière, Vincent Enouf, Maud Vanpeene, Sylvie van der Werf, Le Berre (D) David                                                                                                                                                                                                                                                           |
| EPI_ISL_937154                                                                                                                                                                                                                                                                                 | DOHMH PHL                                                                                                                                                                                                | New York City Public Health Laboratory                                                                                                              | Jade Wang, et al.                                                                                                                                                                                                                                                                                                                                                                                                                       |
| EPI_ISL_938840, EPI_ISL_938855, EPI_ISL_939542                                                                                                                                                                                                                                                 | Lighthouse Lab in Milton Keynes                                                                                                                                                                          | Wellcome Sanger Institute for the COVID-19 Genomics UK (COG-UK) Consortium                                                                          | The Lighthouse Lab in Milton Keynes and Alex Alderton, Roberto Amato, Sonia Goncalves, Ewan Harrison, David K. Jackson, Ian Johnston, Dominic Kwiatkowski, Cordelia Langford, John Sillitoe on behalf of the Wellcome Sanger Institute COVID-19 Surveillance Team                                                                                                                                                                       |
| EPI_ISL_939647, EPI_ISL_940144                                                                                                                                                                                                                                                                 | Laboratory for Respiratory Viruses, Cantacuzino National Military-Medical Institute for Research and Development                                                                                         | Cantacuzino Institute Virology                                                                                                                      | Luiza Ustea, Nicoleta Paraschiv, Mihaela Lazar                                                                                                                                                                                                                                                                                                                                                                                          |
| EPI_ISL_940565                                                                                                                                                                                                                                                                                 | University of Bari Biomedical Sciences and Human Oncology                                                                                                                                                | University of Bari Biomedical Sciences and Human Oncology                                                                                           | Chironna M., Sallustio A., Loconsole D., Accogli M.                                                                                                                                                                                                                                                                                                                                                                                     |
| EPI_ISL_940609                                                                                                                                                                                                                                                                                 | Hospital e Maternidade Celso Pierro                                                                                                                                                                      | Instituto Adolfo Lutz, Interdisciplinary Procedures Center, Strategic Laboratory                                                                    | Claudio Tavares Sacchi, Claudia Regina Gonçalves, Erica Valessa Ramos Gomes, Karoline Rodrigues Campos                                                                                                                                                                                                                                                                                                                                  |
| EPI_ISL_940631                                                                                                                                                                                                                                                                                 | University of Bari Biomedical Sciences and Human Oncology                                                                                                                                                | University of Bari Biomedical Sciences and Human Oncology                                                                                           | Chironna M., Sallustio A., Loconsole D., Accogli M.                                                                                                                                                                                                                                                                                                                                                                                     |
| EPI_ISL_940640, EPI_ISL_940641, EPI_ISL_940645, EPI_ISL_940650, EPI_ISL_940655, EPI_ISL_940656, EPI_ISL_940658, EPI_ISL_940659, EPI_ISL_940660, EPI_ISL_940661, EPI_ISL_940664, EPI_ISL_940673, EPI_ISL_940674, EPI_ISL_940678, EPI_ISL_940679, EPI_ISL_940680, EPI_ISL_940681, EPI_ISL_940682 | see above                                                                                                                                                                                                | Ministry of Health Turkey                                                                                                                           | Fatma Bayraktar, Yasemin Cogun, Süleyman Yalcin, Aye Baak Alta, Gülay Korukluolu                                                                                                                                                                                                                                                                                                                                                        |
| EPI_ISL_940739                                                                                                                                                                                                                                                                                 | University of Bari Biomedical Sciences and Human Oncology                                                                                                                                                | University of Bari Biomedical Sciences and Human Oncology                                                                                           | Chironna M., Sallustio A., Loconsole D., Accogli M.                                                                                                                                                                                                                                                                                                                                                                                     |
| EPI_ISL_940771                                                                                                                                                                                                                                                                                 | Center for Laboratory Medicine St. Gallen                                                                                                                                                                | Center for Laboratory Medicine St. Gallen                                                                                                           | Yannick Gerth                                                                                                                                                                                                                                                                                                                                                                                                                           |
| EPI_ISL_941035, EPI_ISL_941041, EPI_ISL_941058, EPI_ISL_941074                                                                                                                                                                                                                                 | Labo Analyses Med                                                                                                                                                                                        | National Reference Center for Viruses of Respiratory Infections, Institut Pasteur, Paris                                                            | Marion Barbet, Sylvie Behillil, Méline Bizard, Angela Brisebarre, Camille Capel, Etienne Simon-Lorière, Vincent Enouf, Maud Vanpeene, Sylvie van der Werf, Merah Kader                                                                                                                                                                                                                                                                  |
| EPI_ISL_941213                                                                                                                                                                                                                                                                                 | Servicio de Microbiología. Hospital Clínico Universitario de Valencia                                                                                                                                    | SeqCOVID-SPAIN consortium/IBV(CSIC)                                                                                                                 | David Navarro Ortega, Eliseo Albert Vicent, Ignacio Torres and SeqCOVID-SPAIN consortium                                                                                                                                                                                                                                                                                                                                                |
| EPI_ISL_941284, EPI_ISL_941285, EPI_ISL_941293, EPI_ISL_941297                                                                                                                                                                                                                                 | Nigeria Centre for Disease Control (NCDC)                                                                                                                                                                | African Centre of Excellence for Genomics of Infectious Diseases (ACEGID), Redeemer's University                                                    | Oluniyi P.E. et al                                                                                                                                                                                                                                                                                                                                                                                                                      |
| EPI_ISL_941500, EPI_ISL_941505, EPI_ISL_941620, EPI_ISL_941624, EPI_ISL_941628                                                                                                                                                                                                                 | Instituto Nacional de Saude (INSA)                                                                                                                                                                       | Instituto Nacional de Saude (INSA)                                                                                                                  | Borges et al                                                                                                                                                                                                                                                                                                                                                                                                                            |
| EPI_ISL_941893                                                                                                                                                                                                                                                                                 | Instituto Nacional de Saude (INSA) and Instituto Gulbenkian de Ciencia (IGC)                                                                                                                             | Instituto Nacional de Saude (INSA) and Instituto Gulbenkian de Ciencia (IGC)                                                                        | Borges et al                                                                                                                                                                                                                                                                                                                                                                                                                            |
| EPI_ISL_941901                                                                                                                                                                                                                                                                                 | Virginia DCLS                                                                                                                                                                                            | Virginia DCLS                                                                                                                                       | Virginia DCLS                                                                                                                                                                                                                                                                                                                                                                                                                           |
| EPI_ISL_941926                                                                                                                                                                                                                                                                                 | Nigeria Centre for Disease Control (NCDC)                                                                                                                                                                | African Centre of Excellence for Genomics of Infectious Diseases (ACEGID), Redeemer's University                                                    | Oluniyi P.E. et al                                                                                                                                                                                                                                                                                                                                                                                                                      |
| EPI_ISL_944242, EPI_ISL_944321                                                                                                                                                                                                                                                                 | Israel Central Virology laboratory                                                                                                                                                                       | Israel National Consortium for SARS-CoV-2 sequencing                                                                                                | Neta Zuckerman, Efrat Dahan Bucris, Michal Mandelboim, Dana Bar-Ilan, Oran Erster, Tzvia Mann, Omer Murik, David A. Zeevi, Assaf Rokney, Joseph Jaffe, Eva Nachum, Maya Davidovich Cohen, Ephraim Fass, Gal Zizelski Valenci, Mor Rubinstein, Efrat Rorman, Israel Nissan, Efrat Glick-Saar, Omri Nayschool, Gideon Rechavi, Ella Mendelson, Orna Mor                                                                                   |
| EPI_ISL_944597, EPI_ISL_944599                                                                                                                                                                                                                                                                 | Connecticut Department of Public Health                                                                                                                                                                  | Grubaugh Lab - Yale School of Public Health                                                                                                         | Joseph Fauver, Tara Alpert, Anderson Brito, Mallery Breban, Anne Wylie, Chantal Vogles, Mary Petrone, Annie Watkins, Chaney Kalinich, Isabel Ott, Nathan Grubaugh                                                                                                                                                                                                                                                                       |
| EPI_ISL_944670, EPI_ISL_944682, EPI_ISL_944688, EPI_ISL_944705, EPI_ISL_944707, EPI_ISL_944712, EPI_ISL_944717, EPI_ISL_944721                                                                                                                                                                 | Department of Biochemistry, Cell and Molecular Biology, West African Centre for Cell Biology of Infectious Pathogens (WACCBIP), University of Ghana                                                      | Department of Biochemistry, Cell and Molecular Biology, West African Centre for Cell Biology of Infectious Pathogens (WACCBIP), University of Ghana | Morang'a,C.M., Ngoi,J.M., Quansah,E.B., Saiid,S., Amuzu,D.S., Asante,I., Bonney,J.H., Bonney,E., Odoom,J.K., Ndam,N.T., Tei-Maya,F., Adusei-Poku,M., Ofori-Boadu,L., Ampofo,W.K., Amenga-Etego,L.N., Quashie,P., Bediako,Y., Awandare,G.A.                                                                                                                                                                                              |
| EPI_ISL_945609, EPI_ISL_947015, EPI_ISL_947054                                                                                                                                                                                                                                                 | Lighthouse Lab in Alderley Park                                                                                                                                                                          | Wellcome Sanger Institute for the COVID-19 Genomics UK (COG-UK) Consortium                                                                          | Jacquelyn Wynn, Mairead Hyland, The Lighthouse Lab in Alderley Park and Alex Alderton, Roberto Amato, Sonia Goncalves, Ewan Harrison, David K. Jackson, Ian Johnston, Dominic Kwiatkowski, Cordelia Langford, John Sillitoe on behalf of the Wellcome Sanger Institute COVID-19 Surveillance Team                                                                                                                                       |
| EPI_ISL_947122                                                                                                                                                                                                                                                                                 | Lighthouse Lab in Milton Keynes                                                                                                                                                                          | Wellcome Sanger Institute for the COVID-19 Genomics UK (COG-UK) Consortium                                                                          | The Lighthouse Lab in Milton Keynes and Alex Alderton, Roberto Amato, Sonia Goncalves, Ewan Harrison, David K. Jackson, Ian Johnston, Dominic Kwiatkowski, Cordelia Langford, John Sillitoe on behalf of the Wellcome Sanger Institute COVID-19 Surveillance Team                                                                                                                                                                       |
| EPI_ISL_948127                                                                                                                                                                                                                                                                                 | Lighthouse Lab in Glasgow                                                                                                                                                                                | Wellcome Sanger Institute for the COVID-19 Genomics UK (COG-UK) Consortium                                                                          | Harper VanSteenhouse, Yumi Kasai, David Gray, Carol Clugston, Anna Dominiczak and Alex Alderton, Roberto Amato, Sonia Goncalves, Ewan Harrison, David K. Jackson, Ian Johnston, Dominic Kwiatkowski, Cordelia Langford, John Sillitoe on behalf of the Wellcome Sanger Institute COVID-19 Surveillance Team                                                                                                                             |
| EPI_ISL_948513                                                                                                                                                                                                                                                                                 | Lighthouse Lab in Alderley Park                                                                                                                                                                          | Wellcome Sanger Institute for the COVID-19 Genomics UK (COG-UK) Consortium                                                                          | Jacquelyn Wynn, Mairead Hyland, The Lighthouse Lab in Alderley Park and Alex Alderton, Roberto Amato, Sonia Goncalves, Ewan Harrison, David K. Jackson, Ian Johnston, Dominic Kwiatkowski, Cordelia Langford, John Sillitoe on behalf of the Wellcome Sanger Institute COVID-19 Surveillance Team                                                                                                                                       |
| EPI_ISL_949124                                                                                                                                                                                                                                                                                 | SC (UCO) Igiene e Sanità Pubblica (funzione integrata con SC Microbiologia e Virologia) e Laboratory of Molecular Virology of the International Centre for Genetic Engineering and Biotechnology (ICGEB) | ARGO Laboratorio Genomica ed Epigenomica                                                                                                            | Licastro D, Dal Monego S, Degasperis M, Marcello A, D'Agaro P                                                                                                                                                                                                                                                                                                                                                                           |
| EPI_ISL_949182                                                                                                                                                                                                                                                                                 | University of Bari Biomedical Sciences and Human Oncology                                                                                                                                                | University of Bari Biomedical Sciences and Human Oncology                                                                                           | Chironna M., Sallustio A., Loconsole D., Accogli M.                                                                                                                                                                                                                                                                                                                                                                                     |
| EPI_ISL_949184                                                                                                                                                                                                                                                                                 | University of Bari Biomedical Sciences and Human Oncology                                                                                                                                                | University of Bari Biomedical Sciences and Human Oncology                                                                                           | Chironna M., Sallustio A., Loconsole D., Accogli A.                                                                                                                                                                                                                                                                                                                                                                                     |
| EPI_ISL_949188                                                                                                                                                                                                                                                                                 | University of Bari Biomedical Sciences and Human Oncology                                                                                                                                                | University of Bari Biomedical Sciences and Human Oncology                                                                                           | Chironna A., Sallustio A., Loconsole D., Accogli M.                                                                                                                                                                                                                                                                                                                                                                                     |
| EPI_ISL_949408                                                                                                                                                                                                                                                                                 | University of Birmingham                                                                                                                                                                                 | COVID-19 Genomics UK (COG-UK) Consortium                                                                                                            | Institute of Microbiology, University of Birmingham: Claire McMurray, Joanne Stockton, Samuel Nicholls, Radoslaw Poplawski, Will Rowe, Josh Quick, Nicholas Loman. University of Birmingham Testing Laboratory: Celina M Whalley, Andrew Bosworth, Charlotte Poxon, Kasun Wanigasooriya, Oliver Pickles, Mike Kidd, Alex Richter, Andrew D Beggs PHE Heartlands Lab: Husam Osman, Andrew Bosworth. Queen Elizabeth Hospital: Anna Casey |
| EPI_ISL_950160                                                                                                                                                                                                                                                                                 | University College London, Great Ormond Street Hospital for Children NHS Foundation Trust, Imperial College Healthcare NHS Trust                                                                         | COVID-19 Genomics UK (COG-UK) Consortium                                                                                                            | Sergi Castellano, Rachel Williams, Mark Kristiansen, Paola Resende Silva, Sunando Roy, Tony Brooks, Helena Tutill, Paola Niola, Patricia Dyal, Charlotte Williams, Leysa Forrest, Yasmin Panchbhaya, Jacqueline Findlay, Samuel Weeks, Julianne Brown, Kathryn Harris, Paul Randell, James Price, Alison Holmes, Judith Breuer                                                                                                          |

|                                                                                                |                                                                                                                                          |                                                                                                                        |                                                                                                                                                                                                                                                                                                                                                                          |
|------------------------------------------------------------------------------------------------|------------------------------------------------------------------------------------------------------------------------------------------|------------------------------------------------------------------------------------------------------------------------|--------------------------------------------------------------------------------------------------------------------------------------------------------------------------------------------------------------------------------------------------------------------------------------------------------------------------------------------------------------------------|
| EPI_ISL_951165, EPI_ISL_951187                                                                 | Oxford Viroomics, NDM, University of Oxford; Oxford University Hospitals; Basingstoke and North Hampshire Hospital                       | COVID-19 Genomics UK (COG-UK) Consortium                                                                               | Tanya Golubchik, David Bonsall, George Macintyre, Amy Trebes, Mariateresa de Cesare, Catrin Moore, Alex Mobbs, Anita Justice, Robert Shaw, Monique Andersson, Timothy Peto, Emma Wise, Nathan Moore, Jessica Lynch, Nick Cortes, Matilde Mori, Stephen Kidd, David Buck, John Todd, Christophe Fraser                                                                    |
| EPI_ISL_952258, EPI_ISL_952345, EPI_ISL_952351                                                 | Originating lab: Wales Specialist Virology Centre Sequencing lab: Pathogen Genomics Unit                                                 | Public Health Wales Microbiology Cardiff Wales Specialist Virology Centre                                              | Catherine Moore, Johnathan Evans, Laura Gifford, Malorie Perry, Simon Cottrell, Angela Marchbank, Alec Birchley, Alexander Adams, Amy Gaskin, Bree Gatica-Wilcox, Jason Coombes, Joel Southgate, Lauren Gilbert, Lee Graham, Nicole Pacchiarini, Sara Kumziene-Summerhayes, Sarah Taylor, Sophie Jones, Sara Rey, Matthew Bull, Joanne Watkins, Sally Corden, Tom Connor |
| EPI_ISL_953453, EPI_ISL_953485                                                                 | Jessa                                                                                                                                    | Jessa                                                                                                                  | Jessa_cmdLab                                                                                                                                                                                                                                                                                                                                                             |
| EPI_ISL_953523, EPI_ISL_953524, EPI_ISL_953529, EPI_ISL_953583                                 | University Hospitals of Geneva, Laboratory of Virology                                                                                   | HUG, Laboratory of Virology and the Health2030 Genome Center                                                           | Samuel Cordey, Ana Rita Goncalves, Laurent Kaiser, Lorenzo Cerutti, Henri Pegeot, Melyssa Elies, Deborah Penet, Keith Harshman, Ioannis Xenarios, Emmanouil Dermitzakis                                                                                                                                                                                                  |
| EPI_ISL_953963                                                                                 | Recherche                                                                                                                                | National Reference Center for Viruses of Respiratory Infections, Institut Pasteur, Paris                               | Marion Barbet, Sylvie Behillil, Méline Bizard, Angela Brisebarre, Camille Capel, Etienne Simon-Lorière, Vincent Enouf, Maud Vanpeene, Sylvie van der Werf, Leruez-Ville Marianne                                                                                                                                                                                         |
| EPI_ISL_953981, EPI_ISL_953984                                                                 | Hopital                                                                                                                                  | National Reference Center for Viruses of Respiratory Infections, Institut Pasteur, Paris                               | Marion Barbet, Sylvie Behillil, Méline Bizard, Angela Brisebarre, Camille Capel, Etienne Simon-Lorière, Vincent Enouf, Maud Vanpeene, Sylvie van der Werf, Ducancelle Alexandra                                                                                                                                                                                          |
| EPI_ISL_954014                                                                                 | Hopital                                                                                                                                  | National Reference Center for Viruses of Respiratory Infections, Institut Pasteur, Paris                               | Marion Barbet, Sylvie Behillil, Méline Bizard, Angela Brisebarre, Camille Capel, Etienne Simon-Lorière, Vincent Enouf, Maud Vanpeene, Sylvie van der Werf, Farfour Eric                                                                                                                                                                                                  |
| EPI_ISL_954164, EPI_ISL_954168, EPI_ISL_954169, EPI_ISL_954173                                 | Hospital Universitari Vall d'Hebron - Vall d'Hebron Institut de Recerca                                                                  | Hospital Universitari Vall d'Hebron - Vall d'Hebron Institut de Recerca                                                | Cristina Andrés, Maria Piñana, Josep F Abril, Damir Garcia-Cehic, Ariadna Rando, Juliana Esperalba, María Gema Codina, Carla Castillo, María Carmen Martín, Tomás Pumarola, Josep Quer, Andrés Antón                                                                                                                                                                     |
| EPI_ISL_954792                                                                                 | HOSPITAL COMARCAL DE MELILLA                                                                                                             | Instituto de Salud Carlos III                                                                                          | Iglesias-Caballero, M. Camarero, S. Sandonis, V. Vázquez, S. Pozo, F. Casas, I. Jiménez, P. Zaballos, A. Monzón, S. Varona, S. Cuesta, I. Roman, S.                                                                                                                                                                                                                      |
| EPI_ISL_955063                                                                                 | Labo analyses Med                                                                                                                        | National Reference Center for Viruses of Respiratory Infections, Institut Pasteur, Paris                               | Marion Barbet, Sylvie Behillil, Méline Bizard, Angela Brisebarre, Camille Capel, Etienne Simon-Lorière, Vincent Enouf, Maud Vanpeene, Sylvie van der Werf, Potiron GréGoire                                                                                                                                                                                              |
| EPI_ISL_955064                                                                                 | Hopital                                                                                                                                  | National Reference Center for Viruses of Respiratory Infections, Institut Pasteur, Paris                               | Marion Barbet, Sylvie Behillil, Méline Bizard, Angela Brisebarre, Camille Capel, Etienne Simon-Lorière, Vincent Enouf, Maud Vanpeene, Sylvie van der Werf, Guinoiseau Thibault                                                                                                                                                                                           |
| EPI_ISL_955068                                                                                 | Labo analyses Med                                                                                                                        | National Reference Center for Viruses of Respiratory Infections, Institut Pasteur, Paris                               | Marion Barbet, Sylvie Behillil, Méline Bizard, Angela Brisebarre, Camille Capel, Etienne Simon-Lorière, Vincent Enouf, Maud Vanpeene, Sylvie van der Werf, Potiron GréGoire                                                                                                                                                                                              |
| EPI_ISL_955215, EPI_ISL_955218                                                                 | Indiana Animal Disease Diagnostic Laboratory                                                                                             | Carpi Laboratory - Purdue University                                                                                   | Jack Dorman, Ilinca Ciobotariu, Lev Gorenstein, Abebe A Fola, G Kenitra Hendrix, Rebecca P Wilkes, Giovanna Carpi                                                                                                                                                                                                                                                        |
| EPI_ISL_955231, EPI_ISL_955232, EPI_ISL_955258, EPI_ISL_955259                                 | BioReference Lab                                                                                                                         | NJ Public Health and Environmental Laboratories                                                                        | Lindsey Bodnar, Shiv Verma, Dana Woell, Byeong Jeong                                                                                                                                                                                                                                                                                                                     |
| EPI_ISL_955290                                                                                 | TMC/Pathology                                                                                                                            | Pathogen Discovery, Respiratory Viruses Branch, Division of Viral Diseases, Centers for Disease Control and Prevention | Ying Tao, Jing Zhang, Yan Li, Krista Queen, Anna Uehara, Peter Cook, Clinton R. Paden, Haibin Wang, Suxiang Tong                                                                                                                                                                                                                                                         |
| EPI_ISL_955307                                                                                 | OK Public Health Laboratory, Oklahoma State DOH                                                                                          | Pathogen Discovery, Respiratory Viruses Branch, Division of Viral Diseases, Centers for Disease Control and Prevention | Ying Tao, Jing Zhang, Yan Li, Krista Queen, Anna Uehara, Peter Cook, Clinton R. Paden, Haibin Wang, Suxiang Tong                                                                                                                                                                                                                                                         |
| EPI_ISL_955318                                                                                 | Clinical Pathology Lab                                                                                                                   | Pathogen Discovery, Respiratory Viruses Branch, Division of Viral Diseases, Centers for Disease Control and Prevention | Ying Tao, Jing Zhang, Yan Li, Krista Queen, Anna Uehara, Peter Cook, Clinton R. Paden, Haibin Wang, Suxiang Tong                                                                                                                                                                                                                                                         |
| EPI_ISL_955838, EPI_ISL_955891                                                                 | University of Michigan Clinical Microbiology Laboratory                                                                                  | Lauring Lab, University of Michigan, Department of Microbiology and Immunology                                         | Valesano                                                                                                                                                                                                                                                                                                                                                                 |
| EPI_ISL_956272                                                                                 | Thai Red Cross Emerging Infectious Diseases Health Science Centre, Chulalongkorn Hospital, Faculty of Medicine, Chulalongkorn University | Thai Red Cross Emerging Infectious Diseases Center and Faculty of Medicine, Chulalongkorn University                   | Rome Buathong, Sopon Iamsirithaworn, Sininat Petcharat, Yutthana Joyjinda, Weenassarin Ampoot, Apaporn Rodpan, Opass Putcharoen, Thiravat Hemachudha, Supaporn Wacharapluesadee                                                                                                                                                                                          |
| EPI_ISL_956275                                                                                 | Thai Red Cross Emerging Infectious Diseases Health Science Centre, Chulalongkorn Hospital, Faculty of Medicine, Chulalongkorn University | Thai Red Cross Emerging Infectious Diseases Center and Faculty of Medicine, Chulalongkorn University                   | Ratima samorn, Panpit Suwangool, Sininat Petcharat, Yutthana Joyjinda, Weenassarin Ampoot, Apaporn Rodpan, Opass Putcharoen, Thiravat Hemachudha, Supaporn Wacharapluesadee                                                                                                                                                                                              |
| EPI_ISL_956325                                                                                 | Laboratory Medicine                                                                                                                      | Department of Laboratory Medicine, Lin-Kou Chang Gung Memorial Hospital, Taoyuan, Taiwan                               | Kuo-Chien Tsao, Yu-Nong Gong, Shu-Li Yang, Yi-Chun Liu, Chung-Guei Huang, Mei-Jen Hsiao, Po-Wei Huang, Cheng-Ta Yang, Cheng-Hsun Chiu, Peng-Nien Huang, Kuo-Ming Lee, Guang-Wu Chen, Shin-Ru Shih                                                                                                                                                                        |
| EPI_ISL_956426                                                                                 | Lighthouse Lab in Alderley Park                                                                                                          | Wellcome Sanger Institute for the COVID-19 Genomics UK (COG-UK) Consortium                                             | Jacquelyn Wynn, Mairead Hyland, The Lighthouse Lab in Alderley Park and Alex Alderton, Roberto Amato, Sonia Goncalves, Ewan Harrison, David K. Jackson, Ian Johnston, Dominic Kwiatkowski, Cordelia Langford, John Sillitoe on behalf of the Wellcome Sanger Institute COVID-19 Surveillance Team                                                                        |
| EPI_ISL_957212                                                                                 | Lighthouse Lab in Glasgow                                                                                                                | Wellcome Sanger Institute for the COVID-19 Genomics UK (COG-UK) Consortium                                             | Harper VanSteenhouse, Yumi Kasai, David Gray, Carol Clugston, Anna Dominiczak and Alex Alderton, Roberto Amato, Sonia Goncalves, Ewan Harrison, David K. Jackson, Ian Johnston, Dominic Kwiatkowski, Cordelia Langford, John Sillitoe on behalf of the Wellcome Sanger Institute COVID-19 Surveillance Team                                                              |
| EPI_ISL_957428, EPI_ISL_957560, EPI_ISL_957916, EPI_ISL_958449, EPI_ISL_958513, EPI_ISL_958842 | Lighthouse Lab in Milton Keynes                                                                                                          | Wellcome Sanger Institute for the COVID-19 Genomics UK (COG-UK) Consortium                                             | The Lighthouse Lab in Milton Keynes and Alex Alderton, Roberto Amato, Sonia Goncalves, Ewan Harrison, David K. Jackson, Ian Johnston, Dominic Kwiatkowski, Cordelia Langford, John Sillitoe on behalf of the Wellcome Sanger Institute COVID-19 Surveillance Team                                                                                                        |
| EPI_ISL_959398                                                                                 | genXone SA, Molecular Diagnostics Laboratory / NZOZ                                                                                      | genXone SA, Research & Development Laboratory                                                                          | Maciej Sykulski, Grzegorz Nowicki, Jakub Grabowski, Natalia Drwska-Matelska, Anna Brylak-Baszków, Aleksandra Gidlewicz, Karol Szeszko, ukasz Krych, Micha Kaszuba                                                                                                                                                                                                        |
| EPI_ISL_959433, EPI_ISL_959437                                                                 | Servicio de Microbiología, Hospital Universitario Son Espases                                                                            | SeqCOVID-SPAIN consortium/IBV(CSIC)                                                                                    | Carla López-Causapé, Jordi Reina, Antonio Oliver and SeqCOVID-SPAIN consortium                                                                                                                                                                                                                                                                                           |
| EPI_ISL_959573                                                                                 | Labo Luc Olivier                                                                                                                         | GIGA Medical Genomics                                                                                                  | Keith Durkin, Maria Artesi, Sébastien Bontems, Raphaël Boreux, Bouchra Boujemla, Cécile Meex, Pierrette Melin, Marie-Pierre Hayette, Vincent Bours                                                                                                                                                                                                                       |
| EPI_ISL_959608                                                                                 | Institute of Virology, Biomedical Research Center of the Slovak Academy of Sciences, Bratislava                                          | Faculty of Natural Sciences, Comenius University, Bratislava                                                           | Kristína Bořšová, Viktória abanová, Broa Brejová, Viktória Hodorová, Sabina Fumaová Havlíková, Juraj Kopáek, Martina Liková, ubomíra Lukáiková, Martina Neboháová, Monika Sláviková, Tomáš Vína, Boris Klempa, Jozef Nosek                                                                                                                                               |
| EPI_ISL_959629                                                                                 | Institute of Virology, Biomedical Research Center of the Slovak Academy of Sciences, Bratislava                                          | Faculty of Natural Sciences, Comenius University, Bratislava                                                           | Broa Brejová, Viktória abanová, Kristína Bořšová, Viktória Hodorová, Sabina Fumaová Havlíková, Juraj Kopáek, Martina Liková, ubomíra Lukáiková, Martina Neboháová, Monika Sláviková, Tomáš Vína, Jozef Nosek, Boris Klempa                                                                                                                                               |
| EPI_ISL_959638                                                                                 | Institute of Virology, Biomedical Research Center of the Slovak Academy of Sciences, Bratislava                                          | Faculty of Natural Sciences, Comenius University, Bratislava                                                           | Viktória abanová, Kristína Bořšová, Broa Brejová, Viktória Hodorová, Sabina Fumaová Havlíková, Juraj Kopáek, Martina Liková, ubomíra Lukáiková, Martina Neboháová, Monika Sláviková, Tomáš Vína, Jozef Nosek, Boris Klempa                                                                                                                                               |
| EPI_ISL_959821                                                                                 | National Virus Reference Laboratory                                                                                                      | National Virus Reference Laboratory                                                                                    | Michael Carr, Gabriel Gonzalez, Jonathan Dean, Cillian F De Gascun                                                                                                                                                                                                                                                                                                       |
| EPI_ISL_960405, EPI_ISL_960406, EPI_ISL_960407                                                 | The National Institute of Public Health                                                                                                  | State Veterinary Institute Prague                                                                                      | Nagy,A;Vecerova,J;Cernikova,L;Stara,M;Jirincova,H;Trnka,D                                                                                                                                                                                                                                                                                                                |
| EPI_ISL_960459, EPI_ISL_960460, EPI_ISL_960462, EPI_ISL_960465, EPI_ISL_960466                 | Istituto Zooprofilattico Sperimentale del Mezzogiorno                                                                                    | TIGEM                                                                                                                  | Antonio Grimaldi, Patrizia Annunziata, Francesco Panariello, Biancamaria Pierri, Valentina Bouche, Chiara Colantuono, Maria Concetta Cuomo, Denise Di Concilio, Lucio Di Filippo, Anna Manfredi, Marcello Salvi, Antonio Limone, Pellegrino Cerino, Andrea Ballabio, Davide Cacchiarelli.                                                                                |
| EPI_ISL_960681                                                                                 | Germano de sousa                                                                                                                         | Instituto Gulbenkian de Ciencia                                                                                        | Susana Ladeiro, Cathy Paulino, João Costa, João Sobral, Maria Costa, Ricardo Leite                                                                                                                                                                                                                                                                                       |
| EPI_ISL_961067                                                                                 | SIESP DIPARTIMENTO DI PREVENZIONE CHIETI                                                                                                 | Istituto Zooprofilattico Sperimentale dell'Abruzzo e Molise "G. Caporale"                                              | Lorusso A, Marcacci M, Di Domenico M, Ancora M, Curini V, Mangone I, Rinaldi A, Scialabba S, Di Pasquale A, Cammà C, Puglia I, Calistri P, Savini G                                                                                                                                                                                                                      |
| EPI_ISL_961069                                                                                 | SIESP CHIETI - DRIVE IN CHIETI                                                                                                           | Istituto Zooprofilattico Sperimentale dell'Abruzzo e Molise "G.                                                        | Lorusso A, Marcacci M, Di Domenico M, Ancora M, Curini V, Mangone I, Rinaldi A, Scialabba S, Di Pasquale A, Cammà C, Puglia I, Calistri P, Savini G                                                                                                                                                                                                                      |

|                                                                                |                                                                                                           |                                                                                                                                                                |                                                                                                                                                                                                                                                                                                                                                                                                                                                                                                                                                                                                                                                                                                                                                                                                                                                                                          |
|--------------------------------------------------------------------------------|-----------------------------------------------------------------------------------------------------------|----------------------------------------------------------------------------------------------------------------------------------------------------------------|------------------------------------------------------------------------------------------------------------------------------------------------------------------------------------------------------------------------------------------------------------------------------------------------------------------------------------------------------------------------------------------------------------------------------------------------------------------------------------------------------------------------------------------------------------------------------------------------------------------------------------------------------------------------------------------------------------------------------------------------------------------------------------------------------------------------------------------------------------------------------------------|
| EPI_ISL_961077                                                                 | SIESP TERAMO                                                                                              | Caporale"<br>Istituto Zooprofilattico Sperimentale dell'Abruzzo e Molise "G. Caporale"                                                                         | Lorusso A, Marcacci M, Di Domenico M, Ancora M, Curini V, Mangone I, Rinaldi A, Scialabba S, Di Pasquale A, Cammà C, Puglia I, Calistri P, Savini G                                                                                                                                                                                                                                                                                                                                                                                                                                                                                                                                                                                                                                                                                                                                      |
| EPI_ISL_961083                                                                 | DIP. PREV. AVEZZANO SERVIZIO DI IGIENE EPIDEMIOLOGIAE SANITA' PUBBLICA                                    | Istituto Zooprofilattico Sperimentale dell'Abruzzo e Molise "G. Caporale"                                                                                      | Lorusso A, Marcacci M, Di Domenico M, Ancora M, Curini V, Mangone I, Rinaldi A, Scialabba S, Di Pasquale A, Cammà C, Puglia I, Calistri P, Savini G                                                                                                                                                                                                                                                                                                                                                                                                                                                                                                                                                                                                                                                                                                                                      |
| EPI_ISL_961087                                                                 | SIESP DIPARTIMENTO DI PREVENZIONE CHIETI                                                                  | Istituto Zooprofilattico Sperimentale dell'Abruzzo e Molise "G. Caporale"                                                                                      | Lorusso A, Marcacci M, Di Domenico M, Ancora M, Curini V, Mangone I, Rinaldi A, Scialabba S, Di Pasquale A, Cammà C, Puglia I, Calistri P, Savini G                                                                                                                                                                                                                                                                                                                                                                                                                                                                                                                                                                                                                                                                                                                                      |
| EPI_ISL_961221, EPI_ISL_961231, EPI_ISL_961233                                 | Hospital General Universitario de Alicante - Instituto de Investigación Sanitaria y Biomédica de Alicante | SeqCOVID-SPAIN consortium/IBV(CSIC)                                                                                                                            | Maripaz Ventero Martín, Carmen Molina Pardines and SeqCOVID-SPAIN consortium                                                                                                                                                                                                                                                                                                                                                                                                                                                                                                                                                                                                                                                                                                                                                                                                             |
| EPI_ISL_961718                                                                 | SIESP CHIETI - DRIVE IN ORTONA                                                                            | Istituto Zooprofilattico Sperimentale dell'Abruzzo e Molise "G. Caporale"                                                                                      | Lorusso A, Marcacci M, Di Domenico M, Ancora M, Curini V, Mangone I, Rinaldi A, Scialabba S, Di Pasquale A, Cammà C, Puglia I, Calistri P, Savini G                                                                                                                                                                                                                                                                                                                                                                                                                                                                                                                                                                                                                                                                                                                                      |
| EPI_ISL_961731                                                                 | SIESP CHIETI - DRIVE IN CHIETI                                                                            | Istituto Zooprofilattico Sperimentale dell'Abruzzo e Molise "G. Caporale"                                                                                      | Lorusso A, Marcacci M, Di Domenico M, Ancora M, Curini V, Mangone I, Rinaldi A, Scialabba S, Di Pasquale A, Cammà C, Puglia I, Calistri P, Savini G                                                                                                                                                                                                                                                                                                                                                                                                                                                                                                                                                                                                                                                                                                                                      |
| EPI_ISL_961733                                                                 | SIESP CHIETI - DRIVE IN ORTONA                                                                            | Istituto Zooprofilattico Sperimentale dell'Abruzzo e Molise "G. Caporale"                                                                                      | Lorusso A, Marcacci M, Di Domenico M, Ancora M, Curini V, Mangone I, Rinaldi A, Scialabba S, Di Pasquale A, Cammà C, Puglia I, Calistri P, Savini G                                                                                                                                                                                                                                                                                                                                                                                                                                                                                                                                                                                                                                                                                                                                      |
| EPI_ISL_961745                                                                 | SIESP CHIETI DRIVE IN GISSI                                                                               | Istituto Zooprofilattico Sperimentale dell'Abruzzo e Molise "G. Caporale"                                                                                      | Lorusso A, Marcacci M, Di Domenico M, Ancora M, Curini V, Mangone I, Rinaldi A, Scialabba S, Di Pasquale A, Cammà C, Puglia I, Calistri P, Savini G                                                                                                                                                                                                                                                                                                                                                                                                                                                                                                                                                                                                                                                                                                                                      |
| EPI_ISL_962183                                                                 | Toronto Invasive Bacterial Diseases Network                                                               | McMaster University                                                                                                                                            | Allison McGeer, Patryk Aftanas, Hooman Derakhshani, Angel Li, Kuganya Nirmalarajah, Emily Panousis, Ahmed Draia, Jalees Nasir, Michael Surette, Samira Mubareka, Andrew G. McArthur                                                                                                                                                                                                                                                                                                                                                                                                                                                                                                                                                                                                                                                                                                      |
| EPI_ISL_962827                                                                 | Microbiological Diagnostic Unit - Public Health Laboratory (MDU-PHL)                                      | MDU-PHL                                                                                                                                                        | Seemann T., Sait, M.L., Sherry, N.L.                                                                                                                                                                                                                                                                                                                                                                                                                                                                                                                                                                                                                                                                                                                                                                                                                                                     |
| EPI_ISL_962940                                                                 | Hospital Universitario de Gran Canaria Dr. Negrín                                                         | SeqCOVID-SPAIN consortium/IBV(CSIC)                                                                                                                            | M. Carmen Pérez González, Francisco J. Chamizo López, Ana Bordes Benítez and SeqCOVID-SPAIN consortium                                                                                                                                                                                                                                                                                                                                                                                                                                                                                                                                                                                                                                                                                                                                                                                   |
| EPI_ISL_965267                                                                 | SIESP CHIETI, DISTRETTON SAN CHIETI                                                                       | Istituto Zooprofilattico Sperimentale dell'Abruzzo e Molise "G. Caporale"                                                                                      | Lorusso A, Marcacci M, Di Domenico M, Ancora M, Curini V, Mangone I, Rinaldi A, Scialabba S, Di Pasquale A, Cammà C, Puglia I, Calistri P, Savini G                                                                                                                                                                                                                                                                                                                                                                                                                                                                                                                                                                                                                                                                                                                                      |
| EPI_ISL_965273                                                                 | SIESP CHIETI, DISTRETTO SAN CHIETI                                                                        | Istituto Zooprofilattico Sperimentale dell'Abruzzo e Molise "G. Caporale"                                                                                      | Lorusso A, Marcacci M, Di Domenico M, Ancora M, Curini V, Mangone I, Rinaldi A, Scialabba S, Di Pasquale A, Cammà C, Puglia I, Calistri P, Savini G                                                                                                                                                                                                                                                                                                                                                                                                                                                                                                                                                                                                                                                                                                                                      |
| EPI_ISL_965285, EPI_ISL_965287                                                 | P.O.CARDARELLI                                                                                            | Istituto Zooprofilattico Sperimentale dell'Abruzzo e Molise "G. Caporale"                                                                                      | Scutellà M, Niro G, Lorusso A, Marcacci M, Di Domenico M, Ancora M, Curini V, Mangone I, Rinaldi A, Scialabba S, Di Pasquale A, Cammà C, Puglia I, Calistri P, Savini G                                                                                                                                                                                                                                                                                                                                                                                                                                                                                                                                                                                                                                                                                                                  |
| EPI_ISL_965939                                                                 | Hospital Los Arcos del Mar Menor                                                                          | Instituto de Salud Carlos III                                                                                                                                  | Sandonis,V. Vázquez, S. Iglesias-Caballero, M. Camarero, S. Pozo, F. Casas, I. Jiménez, P. Zaballos, A. Monzón, S. Varona, S. Cuesta, I. Cámara, M. Iglesias-Caballero, M. Sandonis,V. Vázquez, S. Camarero, S. Pozo, F. Casas, I. Jiménez, P. Zaballos, A. Monzón, S. Varona, S. Cuesta, I. Román, S. Iglesias-Caballero, M. Sandonis,V. Vázquez, S. Camarero, S. Pozo, F. Casas, I. Jiménez, P. Zaballos, A. Monzón, S. Varona, S. Cuesta, I. Blázquez, A. Vanessa G Allen, Philip Banh, Yao Chen, Richard de Borja, Alireza Eshaghi, Nahuel Fittipaldi, Christine Frantz, Jonathan B Gubbay, Jennifer L Guthrie, Lawrence Heisler, Esha Joshi, Michael Laszloffy, Aimin Li, Michael CY Li, Dean Maxwell, Sandeep Nagra, Samir N Patel, Jared Simpson, Karthikeyan Sivaraman, Ashleigh Sullivan, Yogi Sundaravadanam, Sarah Teatero, Andre Villegas, Matthew Watson, Sandra Zittermann |
| EPI_ISL_965949                                                                 | Hospital Comarcal de Melilla                                                                              | Instituto de Salud Carlos III                                                                                                                                  |                                                                                                                                                                                                                                                                                                                                                                                                                                                                                                                                                                                                                                                                                                                                                                                                                                                                                          |
| EPI_ISL_965953                                                                 | Servicio Murciano de Salud                                                                                | Instituto de Salud Carlos III                                                                                                                                  |                                                                                                                                                                                                                                                                                                                                                                                                                                                                                                                                                                                                                                                                                                                                                                                                                                                                                          |
| EPI_ISL_966036                                                                 | Public Health Ontario Laboratory                                                                          | Public Health Ontario Laboratory                                                                                                                               |                                                                                                                                                                                                                                                                                                                                                                                                                                                                                                                                                                                                                                                                                                                                                                                                                                                                                          |
| EPI_ISL_966397                                                                 | OCME Office Of Chief Medical Examiner                                                                     | New York City Public Health Laboratory                                                                                                                         | Jade Wang, et al.                                                                                                                                                                                                                                                                                                                                                                                                                                                                                                                                                                                                                                                                                                                                                                                                                                                                        |
| EPI_ISL_966507, EPI_ISL_966520, EPI_ISL_966530, EPI_ISL_966548, EPI_ISL_966597 | Helix/Illumina                                                                                            | Respiratory Viruses Branch, Division of Viral Diseases, Centers for Disease Control and Prevention                                                             | Peter W. Cook,Dakota Howard,Dhwani Batra,Ben L. Rambo-Martin,Eileen de Feo,Jan Antico,Christine Tran,Matthew Tolentino,Shannon Wickline,Kim Gietzen,Brad Sickler,Jingtao Liu,Eric Allen,Phil Febbo,Summer Galloway,Nicole L. Washington,Simon White, Geraint Levan,Kelly Schiabor Barrett,Elizabeth Cirulli,Alexandre Bolze,Ary Ascencio,Charlotte Rivera-Garcia,Ryan Cho,Jason Nguyen,Sherry Wang,Jimmy Ramirez,Tyler Cassens,Efren Sandoval,Magnus Isaksson,William Lee,David Becker,Marc Laurent,James Lu,Clinton R. Paden,Suxiang Tong,Duncan MacCannell,                                                                                                                                                                                                                                                                                                                            |
| EPI_ISL_967770                                                                 | State Laboratories Division, Hawaii State Department of Health                                            | State Laboratories Division, Hawaii State Department of Health                                                                                                 | Pamela O'Brien, Drew Kuwazaki, Ayana Garnet, Razvan Sultana, Edward Desmond                                                                                                                                                                                                                                                                                                                                                                                                                                                                                                                                                                                                                                                                                                                                                                                                              |
| EPI_ISL_970546                                                                 | Lighthouse Lab in Alderley Park                                                                           | Wellcome Sanger Institute for the COVID-19 Genomics UK (COG-UK) Consortium                                                                                     | Jacquelyn Wynn, Mairead Hyland, The Lighthouse Lab in Alderley Park and Alex Alderton, Roberto Amato, Sonia Goncalves, Ewan Harrison, David K. Jackson, Ian Johnston, Dominic Kwiatkowski, Cordelia Langford, John Sillitoe on behalf of the Wellcome Sanger Institute COVID-19 Surveillance Team                                                                                                                                                                                                                                                                                                                                                                                                                                                                                                                                                                                        |
| EPI_ISL_977155, EPI_ISL_977157                                                 | ULSS 03 Venezia                                                                                           | Istituto Zooprofilattico Sperimentale delle Venezie                                                                                                            | Adelaide Milani, Alessia Schivo, Annalisa Salviato, Erika Giorgia Quaranta, Ambra Pastori, Bianca Zecchin, Alice Fusaro, Isabella Monne, Calogero Terregino, Antonia Ricci                                                                                                                                                                                                                                                                                                                                                                                                                                                                                                                                                                                                                                                                                                               |
| EPI_ISL_977160                                                                 | Microbiologia e Virologia                                                                                 | Istituto Zooprofilattico Sperimentale delle Venezie                                                                                                            | Adelaide Milani, Alessia Schivo, Annalisa Salviato, Erika Giorgia Quaranta, Ambra Pastori, Bianca Zecchin, Alice Fusaro, Isabella Monne, Calogero Terregino, Antonia Ricci                                                                                                                                                                                                                                                                                                                                                                                                                                                                                                                                                                                                                                                                                                               |
| EPI_ISL_977194                                                                 | ULSS 8 Berica                                                                                             | Istituto Zooprofilattico Sperimentale delle Venezie                                                                                                            | Adelaide Milani, Alessia Schivo, Annalisa Salviato, Erika Giorgia Quaranta, Ambra Pastori, Bianca Zecchin, Alice Fusaro, Isabella Monne, Calogero Terregino, Antonia Ricci                                                                                                                                                                                                                                                                                                                                                                                                                                                                                                                                                                                                                                                                                                               |
| EPI_ISL_977509                                                                 | Hospital Valle del Nalón                                                                                  | Laboratorio de Virología HUCA                                                                                                                                  | Sandoval M, Castelló C, Gómez de Oña J, Boga JA, Rojo S, Alvarez-Arguelles ME, Abreu F, Costales I, Perez-Martínez Z, Martín-Rodríguez G, Coto E, Melón S                                                                                                                                                                                                                                                                                                                                                                                                                                                                                                                                                                                                                                                                                                                                |
| EPI_ISL_977538                                                                 | Caribbean Public Health Agency                                                                            | Carrington Lab, Department of PreClinical Sciences                                                                                                             | Nikita S. D. Sahadeo, Arianne Brown-Jordan, Vernie Ramkissoon, Sarah Hill, Naresh Nandram, Dr. Sharon Belmar-George, Avery Hinds, Jerome Foster, Stanley Giddings, Karla Georges, Marsha Ivey, Rahul Naidu, Risha Singh, SueMin Nathaniel, Rajini Haraksingh, Jaya Jayaraman, Chinna Chinnadurai, Adesh Ramsubhag, Nuno Faria, Oliver Pybus, Christopher Oura, Gabriel Escobar, Christine V. F. Carrington                                                                                                                                                                                                                                                                                                                                                                                                                                                                               |
| EPI_ISL_977539                                                                 | Caribbean Public Health Agency                                                                            | Carrington Lab, Department of PreClinical Sciences                                                                                                             | Nikita S. D. Sahadeo, Arianne Brown-Jordan, Vernie Ramkissoon, Sarah Hill, Naresh Nandram, Avery Hinds, Dr. Sharon Belmar-George, Jerome Foster, Stanley Giddings, Karla Georges, Marsha Ivey, Rahul Naidu, Risha Singh, SueMin Nathaniel, Rajini Haraksingh, Jaya Jayaraman, Chinna Chinnadurai, Adesh Ramsubhag, Nuno Faria, Oliver Pybus, Christopher Oura, Gabriel Escobar, Christine V. F. Carrington                                                                                                                                                                                                                                                                                                                                                                                                                                                                               |
| EPI_ISL_977554, EPI_ISL_977555, EPI_ISL_977558                                 | Nigeria Centre of Disease Control (NCDC)                                                                  | African Centre of Excellence for Genomics of Infectious Diseases (ACEGID), Redeemer's University                                                               | Olawoye I. B. et al                                                                                                                                                                                                                                                                                                                                                                                                                                                                                                                                                                                                                                                                                                                                                                                                                                                                      |
| EPI_ISL_977581, EPI_ISL_977583, EPI_ISL_977584, EPI_ISL_977594                 | Caribbean Public Health Agency                                                                            | Carrington Lab, Department of PreClinical Sciences                                                                                                             | Nikita S. D. Sahadeo, Arianne Brown-Jordan, Vernie Ramkissoon, Sarah Hill, Naresh Nandram, Avery Hinds, Dr. Sharon Belmar-George, Jerome Foster, Stanley Giddings, Karla Georges, Marsha Ivey, Rahul Naidu, Risha Singh, SueMin Nathaniel, Rajini Haraksingh, Jaya Jayaraman, Chinna Chinnadurai, Adesh Ramsubhag, Nuno Faria, Oliver Pybus, Christopher Oura, Gabriel Escobar, Christine V. F. Carrington                                                                                                                                                                                                                                                                                                                                                                                                                                                                               |
| EPI_ISL_977600                                                                 | Biolab Diagnostic Laboratories                                                                            | Biolab Diagnostic Laboratories                                                                                                                                 | Issa Abu-Dayyeh, Ahmad Tibi, Lama Hussein, Shayma Ali, Badia Sadeddin, Amid Abdelnour                                                                                                                                                                                                                                                                                                                                                                                                                                                                                                                                                                                                                                                                                                                                                                                                    |
| EPI_ISL_977654                                                                 | Michigan Department of Health and Human Services, Bureau of Laboratories                                  | Michigan Department of Health and Human Services, Bureau of Laboratories                                                                                       | Blankenship HM, Riner D, Soehnen MK                                                                                                                                                                                                                                                                                                                                                                                                                                                                                                                                                                                                                                                                                                                                                                                                                                                      |
| EPI_ISL_977657, EPI_ISL_977658, EPI_ISL_977659                                 | Caribbean Public Health Agency                                                                            | Carrington Lab, Department of PreClinical Sciences, Building 36, First Floor Biochemistry Unit, Faculty of Medical Sciences, The University of the West Indies | Nikita S. D. Sahadeo, Arianne Brown-Jordan, Vernie Ramkissoon, Sarah Hill, Naresh Nandram, Avery Hinds, Kenneth George, Jerome Foster, Stanley Giddings, Karla Georges, Marsha Ivey, Rahul Naidu, Risha Singh, SueMin Nathaniel, Rajini Haraksingh, Jaya Jayaraman, Chinna Chinnadurai, Adesh Ramsubhag, Nuno Faria, Oliver Pybus, Christopher Oura, Gabriel Escobar, Christine V. F. Carrington                                                                                                                                                                                                                                                                                                                                                                                                                                                                                         |
| EPI_ISL_978179                                                                 | Virginia Division of Consolidated Laboratory Services                                                     | Virginia Division of Consolidated Laboratory Services                                                                                                          | Virginia DCLS                                                                                                                                                                                                                                                                                                                                                                                                                                                                                                                                                                                                                                                                                                                                                                                                                                                                            |
| EPI_ISL_978947, EPI_ISL_978949                                                 | Caribbean Public Health Agency                                                                            | Carrington Lab, Department of PreClinical Sciences, Building                                                                                                   | Nikita S. D. Sahadeo, Arianne Brown-Jordan, Vernie Ramkissoon, Sarah Hill, Naresh Nandram, Avery Hinds, John Lee, Jerome Foster, Stanley Giddings,                                                                                                                                                                                                                                                                                                                                                                                                                                                                                                                                                                                                                                                                                                                                       |

|                                                                                                                                                                                                                                                                |                                                                                                                        |                                                                                                                                                  |                                                                                                                                                                                                                                                                                                                                                                                                 |
|----------------------------------------------------------------------------------------------------------------------------------------------------------------------------------------------------------------------------------------------------------------|------------------------------------------------------------------------------------------------------------------------|--------------------------------------------------------------------------------------------------------------------------------------------------|-------------------------------------------------------------------------------------------------------------------------------------------------------------------------------------------------------------------------------------------------------------------------------------------------------------------------------------------------------------------------------------------------|
|                                                                                                                                                                                                                                                                |                                                                                                                        | 36, First Floor Biochemistry Unit, Faculty of Medical Sciences,<br>The University of the West Indies                                             | Karla Georges, Marsha Ivey, Rahul Naidu, Risha Singh, SueMin Nathaniel, Rajini Haraksingh, Jaya Jayaraman, Chinna Chinnadurai, Adesh Ramsuhg,<br>Nuno Faria, Oliver Pybus, Christopher Oura, Gabriel Escobar, Christine V. F. Carrington                                                                                                                                                        |
| EPI_ISL_979365, EPI_ISL_979366,<br>EPI_ISL_979367, EPI_ISL_979368,<br>EPI_ISL_979369, EPI_ISL_979370,<br>EPI_ISL_979372, EPI_ISL_979374,<br>EPI_ISL_979375, EPI_ISL_979377                                                                                     | The Jackson Laboratory                                                                                                 | The Jackson Laboratory                                                                                                                           | Lloyd M, Sanderson B, Srivastava A, Maurya R, Renzette N, Omerza G, Kelly K, Li L, Wei C L, Adams M                                                                                                                                                                                                                                                                                             |
| EPI_ISL_979453, EPI_ISL_979454                                                                                                                                                                                                                                 | University of Iowa Hospitals and Clinics                                                                               | State Hygienic Laboratory at the University of Iowa                                                                                              | Valerie Reeb, Wes Hottel, Alankar Kamppowale                                                                                                                                                                                                                                                                                                                                                    |
| EPI_ISL_979455                                                                                                                                                                                                                                                 | Test Iowa                                                                                                              | State Hygienic Laboratory at the University of Iowa                                                                                              | Valerie Reeb, Wes Hottel, Alankar Kamppowale                                                                                                                                                                                                                                                                                                                                                    |
| EPI_ISL_979457                                                                                                                                                                                                                                                 | State Hygienic Laboratory at the University of Iowa                                                                    | State Hygienic Laboratory at the University of Iowa                                                                                              | Valerie Reeb, Erik Twait, Wes Hottel, Alankar Kamppowale                                                                                                                                                                                                                                                                                                                                        |
| EPI_ISL_979458                                                                                                                                                                                                                                                 | Test Iowa                                                                                                              | State Hygienic Laboratory at the University of Iowa                                                                                              | Valerie Reeb, Erik Twait, Wes Hottel, Alankar Kamppowale                                                                                                                                                                                                                                                                                                                                        |
| EPI_ISL_979544, EPI_ISL_979799,<br>EPI_ISL_979801, EPI_ISL_979803,<br>EPI_ISL_979893, EPI_ISL_979961,<br>EPI_ISL_979963, EPI_ISL_979967,<br>EPI_ISL_979969                                                                                                     | National Institute of Infectious Diseases-Prof. Dr. Matei Bals<br>Molecular Diagnostics Laboratory                     | National Institute of Infectious Diseases-Prof. Dr. Matei Bals<br>Molecular Diagnostics Laboratory                                               | Leontina Banica, Marius Surleac, Corina Casangiu, Petre Milu, Andreea Tudor, Simona Paraschiv, Dan Otelea                                                                                                                                                                                                                                                                                       |
| EPI_ISL_980357                                                                                                                                                                                                                                                 | Lighthouse Lab in Cambridge                                                                                            | Wellcome Sanger Institute for the COVID-19 Genomics UK<br>(COG-UK) Consortium                                                                    | Rob Howes, The Lighthouse Lab in Cambridge and Alex Alderton, Roberto Amato, Sonia Goncalves, Ewan Harrison, David K. Jackson, Ian Johnston,<br>Dominic Kwiatkowski, Cordelia Langford, John Sillitoe on behalf of the Wellcome Sanger Institute COVID-19 Surveillance Team                                                                                                                     |
| EPI_ISL_980781                                                                                                                                                                                                                                                 | Lighthouse Lab in Milton Keynes                                                                                        | Wellcome Sanger Institute for the COVID-19 Genomics UK<br>(COG-UK) Consortium                                                                    | The Lighthouse Lab in Milton Keynes and Alex Alderton, Roberto Amato, Sonia Goncalves, Ewan Harrison, David K. Jackson, Ian Johnston, Dominic<br>Kwiatkowski, Cordelia Langford, John Sillitoe on behalf of the Wellcome Sanger Institute COVID-19 Surveillance Team                                                                                                                            |
| EPI_ISL_980808                                                                                                                                                                                                                                                 | genXone SA, Molecular Diagnostics Laboratory / NZOZ                                                                    | genXone SA, Research & Development Laboratory                                                                                                    | Maciej Sykulski, Grzegorz Nowicki, Jakub Grabowski, Natalia Drwska-Matelska, Anna Brylak-Baszaków, Aleksandra Gidlewicz, Karol Szeszko, ukasz Krych,<br>Micha Kaszuba                                                                                                                                                                                                                           |
| EPI_ISL_981291, EPI_ISL_981296                                                                                                                                                                                                                                 | Hospital Universitari de Bellvitge                                                                                     | Hospital Universitari Vall d'Hebron - Vall d'Hebron Institut de<br>Recerca                                                                       | Cristina Andrés, Maria Piñana, Josep F Abril, Damir Garcia-Cehic, Ariadna Rando, Juliana Esperalba, Maria Gema Codina, Carla Castillo, Maria Carmen<br>Martin, Tomás Pumarola, Josep Quer, Andrés Antón                                                                                                                                                                                         |
| EPI_ISL_981372                                                                                                                                                                                                                                                 | Laboratory for Respiratory Viruses, "Cantacuzino" National<br>Military-Medical Institute for Resararch and Development | Cantacuzino Institute Virology                                                                                                                   | Luiza Ustea, Nicoleta Paraschiv, Catalina Pascu, Mihaela Lazar                                                                                                                                                                                                                                                                                                                                  |
| EPI_ISL_981374                                                                                                                                                                                                                                                 | Laboratory for Respiratory Viruses, Cantacuzino National<br>Military-Medical Institute for Research and Development    | Cantacuzino Institute Virology                                                                                                                   | Luiza Ustea, Nicoleta Paraschiv, Catalina Pascu, Mihaela Lazar                                                                                                                                                                                                                                                                                                                                  |
| EPI_ISL_981437, EPI_ISL_981511,<br>EPI_ISL_981513                                                                                                                                                                                                              | Groupe LCD                                                                                                             | Department of Virology, Henri Mondor University Hospital,<br>Assistance Publique Hôpitaux de Paris, Université Paris-Est<br>Créteil, INSERM U955 | Christophe Rodriguez, Slim Fourati, Vanessa Demontant, Guillaume Gricourt, Melissa N'Debi, Alexandre Soulier, Elisabeth Trawinski, Jean-Michel<br>Pawlotsky                                                                                                                                                                                                                                     |
| EPI_ISL_981955, EPI_ISL_981956,<br>EPI_ISL_981960                                                                                                                                                                                                              | Microbiology Service, Hospital Universitario Clinico San<br>Cecilio, Granada                                           | Microbiology Service, Hospital Universitario Clinico San<br>Cecilio, Granada                                                                     | Adolfo de Salazar, Natalia Chueca, Laura Viñuela, Ana Fuentes, Federico Garcia                                                                                                                                                                                                                                                                                                                  |
| EPI_ISL_982137                                                                                                                                                                                                                                                 | Hôpital Henri Mondor                                                                                                   | Department of Virology, Henri Mondor University Hospital,<br>Assistance Publique Hôpitaux de Paris, Université Paris-Est<br>Créteil, INSERM U955 | Christophe Rodriguez, Slim Fourati, Vanessa Demontant, Guillaume Gricourt, Melissa N'Debi, Alexandre Soulier, Elisabeth Trawinski, Jean-Michel<br>Pawlotsky                                                                                                                                                                                                                                     |
| EPI_ISL_982876, EPI_ISL_982889                                                                                                                                                                                                                                 | MEPHI Aix Marseille University (AMU)                                                                                   | MEPHI Aix Marseille University (AMU)                                                                                                             | Anthony LEVASSEUR                                                                                                                                                                                                                                                                                                                                                                               |
| EPI_ISL_983078, EPI_ISL_983084,<br>EPI_ISL_983087                                                                                                                                                                                                              | Gravity Diagnostics                                                                                                    | Kentucky State Public Health Lab                                                                                                                 | Stephanie Lunn, Karim George, Joshua Tobias, William Grooms, Vaneet Arora, Matthew Johnson, Rachel Zinner, Rhonda Lucas                                                                                                                                                                                                                                                                         |
| EPI_ISL_983098                                                                                                                                                                                                                                                 | Microbiology and Virology Unit, Florence Careggi University<br>Hospital                                                | Microbiology and Virology Unit, Florence Careggi University<br>Hospital                                                                          | Vincenzo Di Pilato, Marco Coppi, Fabio Morecchiato, Noemi Aiezza, Ilaria Baccani, Alberto Antonelli, Emanuele Gori, Gian Maria Rossolini                                                                                                                                                                                                                                                        |
| EPI_ISL_983409, EPI_ISL_983417,<br>EPI_ISL_983418, EPI_ISL_983419,<br>EPI_ISL_983421, EPI_ISL_983422,<br>EPI_ISL_983423, EPI_ISL_983428,<br>EPI_ISL_983431                                                                                                     | Ministry of Health Turkey                                                                                              | Ministry of Health Turkey                                                                                                                        | Fatma Bayraktar, Yasemin Cogun, Süleyman Yalcin, Aye Baak Alta, Gülay Korukluolu                                                                                                                                                                                                                                                                                                                |
| EPI_ISL_984010                                                                                                                                                                                                                                                 | Wisconsin State Laboratory of Hygiene Communicable<br>Disease Division                                                 | Wisconsin State Laboratory of Hygiene Communicable<br>Disease Division                                                                           | Kelsey R. Florek, Abigail C. Shockey                                                                                                                                                                                                                                                                                                                                                            |
| EPI_ISL_984299                                                                                                                                                                                                                                                 | Tampa General Hospital Esoteric Lab                                                                                    | Tampa General Hospital Esoteric Research & Development<br>Lab                                                                                    | Grant Vestal, Deanna Becker, Dominic Uy, Amorice Lima, Suzane Silbert                                                                                                                                                                                                                                                                                                                           |
| EPI_ISL_985004, EPI_ISL_985007                                                                                                                                                                                                                                 | S.C. Laboratorio Analisi, ASL 3 Liguria                                                                                | U.O. Igiene, Ospedale Policlinico San Martino                                                                                                    | Bruzzone Bianca, Caligiuri Patrizia, De Pace Vanessa, Domnich Alexander, Orsi Andrea, Ricucci Valentina, Spitaleri Antonino, Icardi Giancarlo                                                                                                                                                                                                                                                   |
| EPI_ISL_985018, EPI_ISL_985021                                                                                                                                                                                                                                 | S.S.D. Microbiologia, Stabilimento ospedaliero di Sanremo,<br>ASL 1 Liguria                                            | U.O. Igiene, Ospedale Policlinico San Martino                                                                                                    | Bruzzone Bianca, Caligiuri Patrizia, De Pace Vanessa, Domnich Alexander, Dusi Pier Andrea, Orsi Andrea, Ricucci Valentina, Icardi Giancarlo                                                                                                                                                                                                                                                     |
| EPI_ISL_985030                                                                                                                                                                                                                                                 | Laboratorio di Patologia Clinica, Ospedale San Paolo in<br>Valloira, ASL 2 Liguria                                     | U.O. Igiene, Ospedale Policlinico San Martino                                                                                                    | Bruzzone Bianca, Caligiuri Patrizia, De Pace Vanessa, Domnich Alexander, Lillo Flavia, Orsi Andrea, Ricucci Valentina, Icardi Giancarlo                                                                                                                                                                                                                                                         |
| EPI_ISL_985058, EPI_ISL_985064, EPI_ISL_985065, EPI_ISL_985066, EPI_ISL_985070, EPI_ISL_985073, EPI_ISL_985074, EPI_ISL_985083, EPI_ISL_985084, EPI_ISL_985085, EPI_ISL_985085, EPI_ISL_985093, EPI_ISL_985094, EPI_ISL_985095, EPI_ISL_985102, EPI_ISL_985104 | see above                                                                                                              | Biorepository and Clinical Virology Laboratory                                                                                                   | Ozer Lab                                                                                                                                                                                                                                                                                                                                                                                        |
| EPI_ISL_985253                                                                                                                                                                                                                                                 | Delaware Public Health Laboratory (DPHL)                                                                               | Delaware Public Health Lab                                                                                                                       | Ramon Lorenzo-Redondo, Adeola A. Fowotade, Ewean C. Omoruyi, Johnson A. Adeniji, Lacy M. Simons, Judd F. Hultquist, Babafemi O. Taiwo, Olubusuyi<br>M. Adewumi, Egon A. Ozer                                                                                                                                                                                                                    |
| EPI_ISL_985787                                                                                                                                                                                                                                                 | Lighthouse Lab in Alderley Park                                                                                        | Wellcome Sanger Institute for the COVID-19 Genomics UK<br>(COG-UK) Consortium                                                                    | Gregory Hovan                                                                                                                                                                                                                                                                                                                                                                                   |
| EPI_ISL_986010, EPI_ISL_986207                                                                                                                                                                                                                                 | Lighthouse Lab in Milton Keynes                                                                                        | Wellcome Sanger Institute for the COVID-19 Genomics UK<br>(COG-UK) Consortium                                                                    | Jacquelyn Wynn, Mairead Hyland, The Lighthouse Lab in Alderley Park and Alex Alderton, Roberto Amato, Sonia Goncalves, Ewan Harrison, David K.<br>Jackson, Ian Johnston, Dominic Kwiatkowski, Cordelia Langford, John Sillitoe on behalf of the Wellcome Sanger Institute COVID-19 Surveillance Team                                                                                            |
| EPI_ISL_986582, EPI_ISL_986622,<br>EPI_ISL_986653, EPI_ISL_986820                                                                                                                                                                                              | Lighthouse Lab in Cambridge                                                                                            | Wellcome Sanger Institute for the COVID-19 Genomics UK<br>(COG-UK) Consortium                                                                    | The Lighthouse Lab in Milton Keynes and Alex Alderton, Roberto Amato, Sonia Goncalves, Ewan Harrison, David K. Jackson, Ian Johnston, Dominic<br>Kwiatkowski, Cordelia Langford, John Sillitoe on behalf of the Wellcome Sanger Institute COVID-19 Surveillance Team<br>( <a href="http://www.sanger.ac.uk/covid-team">http://www.sanger.ac.uk/covid-team</a> )                                 |
| EPI_ISL_986995, EPI_ISL_987125                                                                                                                                                                                                                                 | Lighthouse Lab in Alderley Park                                                                                        | Wellcome Sanger Institute for the COVID-19 Genomics UK<br>(COG-UK) Consortium                                                                    | Rob Howes, The Lighthouse Lab in Cambridge and Alex Alderton, Roberto Amato, Sonia Goncalves, Ewan Harrison, David K. Jackson, Ian Johnston,<br>Dominic Kwiatkowski, Cordelia Langford, John Sillitoe on behalf of the Wellcome Sanger Institute COVID-19 Surveillance Team<br>( <a href="http://www.sanger.ac.uk/covid-team">http://www.sanger.ac.uk/covid-team</a> )                          |
| EPI_ISL_987161, EPI_ISL_987561,<br>EPI_ISL_987856, EPI_ISL_987947,                                                                                                                                                                                             | Lighthouse Lab in Cambridge                                                                                            | Wellcome Sanger Institute for the COVID-19 Genomics UK<br>(COG-UK) Consortium                                                                    | Jacquelyn Wynn, Mairead Hyland, The Lighthouse Lab in Alderley Park and Alex Alderton, Roberto Amato, Sonia Goncalves, Ewan Harrison, David K.<br>Jackson, Ian Johnston, Dominic Kwiatkowski, Cordelia Langford, John Sillitoe on behalf of the Wellcome Sanger Institute COVID-19 Surveillance Team<br>( <a href="http://www.sanger.ac.uk/covid-team">http://www.sanger.ac.uk/covid-team</a> ) |
|                                                                                                                                                                                                                                                                |                                                                                                                        |                                                                                                                                                  | Rob Howes, The Lighthouse Lab in Cambridge and Alex Alderton, Roberto Amato, Sonia Goncalves, Ewan Harrison, David K. Jackson, Ian Johnston,<br>Dominic Kwiatkowski, Cordelia Langford, John Sillitoe on behalf of the Wellcome Sanger Institute COVID-19 Surveillance Team                                                                                                                     |

|                                                                                                                                                                                                                                |                                                                         |                                                                                              |                                                                                                                                                                                                                                                                                                                                                                                                     |                                                                                         |
|--------------------------------------------------------------------------------------------------------------------------------------------------------------------------------------------------------------------------------|-------------------------------------------------------------------------|----------------------------------------------------------------------------------------------|-----------------------------------------------------------------------------------------------------------------------------------------------------------------------------------------------------------------------------------------------------------------------------------------------------------------------------------------------------------------------------------------------------|-----------------------------------------------------------------------------------------|
| EPI_ISL_988053, EPI_ISL_988127, EPI_ISL_988216                                                                                                                                                                                 |                                                                         |                                                                                              |                                                                                                                                                                                                                                                                                                                                                                                                     | ( <a href="http://www.sanger.ac.uk/covid-team">http://www.sanger.ac.uk/covid-team</a> ) |
| EPI_ISL_988504, EPI_ISL_988662                                                                                                                                                                                                 | Lighthouse Lab in Milton Keynes                                         | Wellcome Sanger Institute for the COVID-19 Genomics UK (COG-UK) Consortium                   | The Lighthouse Lab in Milton Keynes and Alex Alderton, Roberto Amato, Sonia Goncalves, Ewan Harrison, David K. Jackson, Ian Johnston, Dominic Kwiatkowski, Cordelia Langford, John Sillitoe on behalf of the Wellcome Sanger Institute COVID-19 Surveillance Team ( <a href="http://www.sanger.ac.uk/covid-team">http://www.sanger.ac.uk/covid-team</a> )                                           |                                                                                         |
| EPI_ISL_988839                                                                                                                                                                                                                 | Lighthouse Lab in Alderley Park                                         | Wellcome Sanger Institute for the COVID-19 Genomics UK (COG-UK) Consortium                   | Jacquelyn Wynn, Mairead Hyland, The Lighthouse Lab in Alderley Park and Alex Alderton, Roberto Amato, Sonia Goncalves, Ewan Harrison, David K. Jackson, Ian Johnston, Dominic Kwiatkowski, Cordelia Langford, John Sillitoe on behalf of the Wellcome Sanger Institute COVID-19 Surveillance Team ( <a href="http://www.sanger.ac.uk/covid-team">http://www.sanger.ac.uk/covid-team</a> )           |                                                                                         |
| EPI_ISL_989225, EPI_ISL_990605, EPI_ISL_990691, EPI_ISL_990823, EPI_ISL_990925                                                                                                                                                 | Lighthouse Lab in Alderley Park                                         | Wellcome Sanger Institute for the COVID-19 Genomics UK (COG-UK) Consortium                   | Jacquelyn Wynn, Mairead Hyland, The Lighthouse Lab in Alderley Park and Alex Alderton, Roberto Amato, Sonia Goncalves, Ewan Harrison, David K. Jackson, Ian Johnston, Dominic Kwiatkowski, Cordelia Langford, John Sillitoe on behalf of the Wellcome Sanger Institute COVID-19 Surveillance Team                                                                                                   |                                                                                         |
| EPI_ISL_991497                                                                                                                                                                                                                 | Lighthouse Lab in Glasgow                                               | Wellcome Sanger Institute for the COVID-19 Genomics UK (COG-UK) Consortium                   | Harper VanSteenhouse, Yumi Kasai, David Gray, Carol Clugston, Anna Dominiczak and Alex Alderton, Roberto Amato, Sonia Goncalves, Ewan Harrison, David K. Jackson, Ian Johnston, Dominic Kwiatkowski, Cordelia Langford, John Sillitoe on behalf of the Wellcome Sanger Institute COVID-19 Surveillance Team                                                                                         |                                                                                         |
| EPI_ISL_992622                                                                                                                                                                                                                 | Lighthouse Lab in Alderley Park                                         | Wellcome Sanger Institute for the COVID-19 Genomics UK (COG-UK) Consortium                   | Jacquelyn Wynn, Mairead Hyland, The Lighthouse Lab in Alderley Park and Alex Alderton, Roberto Amato, Sonia Goncalves, Ewan Harrison, David K. Jackson, Ian Johnston, Dominic Kwiatkowski, Cordelia Langford, John Sillitoe on behalf of the Wellcome Sanger Institute COVID-19 Surveillance Team ( <a href="http://www.sanger.ac.uk/covid-team">http://www.sanger.ac.uk/covid-team</a> )           |                                                                                         |
| EPI_ISL_993265, EPI_ISL_993359                                                                                                                                                                                                 | Lighthouse Lab in Milton Keynes                                         | Wellcome Sanger Institute for the COVID-19 Genomics UK (COG-UK) Consortium                   | The Lighthouse Lab in Milton Keynes and Alex Alderton, Roberto Amato, Sonia Goncalves, Ewan Harrison, David K. Jackson, Ian Johnston, Dominic Kwiatkowski, Cordelia Langford, John Sillitoe on behalf of the Wellcome Sanger Institute COVID-19 Surveillance Team ( <a href="http://www.sanger.ac.uk/covid-team">http://www.sanger.ac.uk/covid-team</a> )                                           |                                                                                         |
| EPI_ISL_993809                                                                                                                                                                                                                 | Lighthouse Lab in Cambridge                                             | Wellcome Sanger Institute for the COVID-19 Genomics UK (COG-UK) Consortium                   | Rob Howes, The Lighthouse Lab in Cambridge and Alex Alderton, Roberto Amato, Sonia Goncalves, Ewan Harrison, David K. Jackson, Ian Johnston, Dominic Kwiatkowski, Cordelia Langford, John Sillitoe on behalf of the Wellcome Sanger Institute COVID-19 Surveillance Team                                                                                                                            |                                                                                         |
| EPI_ISL_994171                                                                                                                                                                                                                 | Lighthouse Lab in Glasgow                                               | Wellcome Sanger Institute for the COVID-19 Genomics UK (COG-UK) Consortium                   | Harper VanSteenhouse, Yumi Kasai, David Gray, Carol Clugston, Anna Dominiczak and Alex Alderton, Roberto Amato, Sonia Goncalves, Ewan Harrison, David K. Jackson, Ian Johnston, Dominic Kwiatkowski, Cordelia Langford, John Sillitoe on behalf of the Wellcome Sanger Institute COVID-19 Surveillance Team ( <a href="http://www.sanger.ac.uk/covid-team">http://www.sanger.ac.uk/covid-team</a> ) |                                                                                         |
| EPI_ISL_994875, EPI_ISL_994882, EPI_ISL_994897, EPI_ISL_994908, EPI_ISL_994910, EPI_ISL_994926, EPI_ISL_994927, EPI_ISL_994948, EPI_ISL_994982, EPI_ISL_995009, EPI_ISL_995047, EPI_ISL_995070, EPI_ISL_995137, EPI_ISL_995169 |                                                                         |                                                                                              |                                                                                                                                                                                                                                                                                                                                                                                                     |                                                                                         |
| see above                                                                                                                                                                                                                      | Pandemic Response Lab - NYC                                             | Pandemic Response Lab, R&D                                                                   | Henry Lee, Michael Hammerling, Melissa Hopkins, Cybill del Castillo, William Ward, Pradeep Bugga, Haiping Hao, Jon Laurent                                                                                                                                                                                                                                                                          |                                                                                         |
| EPI_ISL_995552                                                                                                                                                                                                                 | LKOLMC                                                                  | Jessa                                                                                        | Jessa_cmdLab                                                                                                                                                                                                                                                                                                                                                                                        |                                                                                         |
| EPI_ISL_995711                                                                                                                                                                                                                 | BANGALORE MEDICAL COLLEGE AND RESEARCH INSTITUTE                        | Department of Neurovirology, National Institute of Mental Health and Neurosciences (NIMHANS) | Chitra Pattabiraman, Pramada Prasad, Anson Kunjumon George, Risha Rasheed, Darshan Sreenivas, Nakka Vijay Kiran Reddy, Anita S Desai, V Ravi                                                                                                                                                                                                                                                        |                                                                                         |
| EPI_ISL_995761                                                                                                                                                                                                                 | KEMPEGOWDA INTERNATIONAL AIRPORT                                        | Department of Neurovirology, National Institute of Mental Health and Neurosciences (NIMHANS) | Chitra Pattabiraman, Pramada Prasad, Anson Kunjumon George, Harsha.P.K, Risha Rasheed, Darshan Sreenivas, Nakka Vijay Kiran Reddy, Anita S Desai, V Ravi                                                                                                                                                                                                                                            |                                                                                         |
| EPI_ISL_999945                                                                                                                                                                                                                 | Wales Specialist Virology Centre Sequencing lab: Pathogen Genomics Unit | Public Health Wales Microbiology Cardiff Wales Specialist Virology Centre                    | Catherine Moore, Johnathan Evans, Laura Gifford, Malorie Perry, Simon Cottrell, Angela Marchbank, Alec Birchley, Alexander Adams, Amy Gaskin, Bree Gatica-Wilcox, Jason Coombes, Joel Southgate, Lauren Gilbert, Lee Graham, Nicole Pacchiarini, Sara Kumziene-Summerhayes, Sarah Taylor, Sophie Jones, Sara Rey, Matthew Bull, Joanne Watkins, Sally Corden, Tom Connor                            |                                                                                         |
