# Supplementary material for: Combining genomic and epidemiological data to compare the transmissibility of SARS-CoV-2 lineages
Source: bioRxiv or medRxiv preprint supplement (doi:10.1101/2021.07.01.21259859), 2021-07-02
Supplement: Supplementary file [file media-2.pdf]

We gratefully acknowledge the following Authors from the Originating laboratories responsible for obtaining the specimens, as well as the Submitting laboratories where the genome data were generated and shared via GISAID, on which this research is based.

All Submitters of data may be contacted directly via [www.gisaid.org](http://www.gisaid.org)

Authors are sorted alphabetically.

| Accession ID                                                                                                                                                                                                                                                                                                                                                                                                                                                                                                                                                                                                                                                                                                                                                                                                                                                                                                                                                                                                                                                                                                                                                                                                                                                                                                                                                                                                                                                                                                                                                                                              | Originating Laboratory                                             | Submitting Laboratory                                                                              | Authors                                                                                                                                                                       |
|-----------------------------------------------------------------------------------------------------------------------------------------------------------------------------------------------------------------------------------------------------------------------------------------------------------------------------------------------------------------------------------------------------------------------------------------------------------------------------------------------------------------------------------------------------------------------------------------------------------------------------------------------------------------------------------------------------------------------------------------------------------------------------------------------------------------------------------------------------------------------------------------------------------------------------------------------------------------------------------------------------------------------------------------------------------------------------------------------------------------------------------------------------------------------------------------------------------------------------------------------------------------------------------------------------------------------------------------------------------------------------------------------------------------------------------------------------------------------------------------------------------------------------------------------------------------------------------------------------------|--------------------------------------------------------------------|----------------------------------------------------------------------------------------------------|-------------------------------------------------------------------------------------------------------------------------------------------------------------------------------|
| EPI_ISL_1009654                                                                                                                                                                                                                                                                                                                                                                                                                                                                                                                                                                                                                                                                                                                                                                                                                                                                                                                                                                                                                                                                                                                                                                                                                                                                                                                                                                                                                                                                                                                                                                                           | DPHL                                                               | Delaware Public Health Lab                                                                         | Gregory Hovan                                                                                                                                                                 |
| EPI_ISL_1015696, EPI_ISL_1015699, EPI_ISL_1015702, EPI_ISL_1015703                                                                                                                                                                                                                                                                                                                                                                                                                                                                                                                                                                                                                                                                                                                                                                                                                                                                                                                                                                                                                                                                                                                                                                                                                                                                                                                                                                                                                                                                                                                                        | Columbia University Irving Medical Center                          | Wadsworth Center, New York State Department of Health                                              | Kirsten St. George, Daryl M. Lamson, Alexis Russel, Matthew Shudt, Melissa A Leisner, Jonathan Plitnick, Navjot Singh, John Kelly, Erasmus Schneider, Erica Lasek-Nesselquist |
| EPI_ISL_1016177, EPI_ISL_1016182, EPI_ISL_1016184, EPI_ISL_1016199, EPI_ISL_1016211, EPI_ISL_1016213                                                                                                                                                                                                                                                                                                                                                                                                                                                                                                                                                                                                                                                                                                                                                                                                                                                                                                                                                                                                                                                                                                                                                                                                                                                                                                                                                                                                                                                                                                      | MONTEFIORE MEDICAL CENTER LABORATORIES                             | Wadsworth Center, New York State Department of Health                                              | Kirsten St. George, Daryl M. Lamson, Alexis Russel, Matthew Shudt, Melissa A Leisner, Jonathan Plitnick, Navjot Singh, John Kelly, Erasmus Schneider, Erica Lasek-Nesselquist |
| EPI_ISL_1016228, EPI_ISL_1016242, EPI_ISL_1016244, EPI_ISL_1016248                                                                                                                                                                                                                                                                                                                                                                                                                                                                                                                                                                                                                                                                                                                                                                                                                                                                                                                                                                                                                                                                                                                                                                                                                                                                                                                                                                                                                                                                                                                                        | New York Presbyterian Hospital                                     | Wadsworth Center, New York State Department of Health                                              | Kirsten St. George, Daryl M. Lamson, Alexis Russel, Matthew Shudt, Melissa A Leisner, Jonathan Plitnick, Navjot Singh, John Kelly, Erasmus Schneider, Erica Lasek-Nesselquist |
| EPI_ISL_1016260, EPI_ISL_1016268, EPI_ISL_1016331                                                                                                                                                                                                                                                                                                                                                                                                                                                                                                                                                                                                                                                                                                                                                                                                                                                                                                                                                                                                                                                                                                                                                                                                                                                                                                                                                                                                                                                                                                                                                         | Columbia University Irving Medical Center                          | Wadsworth Center, New York State Department of Health                                              | Kirsten St. George, Daryl M. Lamson, Alexis Russel, Matthew Shudt, Melissa A Leisner, Jonathan Plitnick, Navjot Singh, John Kelly, Erasmus Schneider, Erica Lasek-Nesselquist |
| EPI_ISL_1017982, EPI_ISL_1017985                                                                                                                                                                                                                                                                                                                                                                                                                                                                                                                                                                                                                                                                                                                                                                                                                                                                                                                                                                                                                                                                                                                                                                                                                                                                                                                                                                                                                                                                                                                                                                          | DOHMH Central Harlem                                               | New York City Public Health Laboratory                                                             | Jade Wang, et al.                                                                                                                                                             |
| EPI_ISL_1017990                                                                                                                                                                                                                                                                                                                                                                                                                                                                                                                                                                                                                                                                                                                                                                                                                                                                                                                                                                                                                                                                                                                                                                                                                                                                                                                                                                                                                                                                                                                                                                                           | Department of Homeless Services                                    | New York City Public Health Laboratory                                                             | Jade Wang, et al.                                                                                                                                                             |
| EPI_ISL_1018003                                                                                                                                                                                                                                                                                                                                                                                                                                                                                                                                                                                                                                                                                                                                                                                                                                                                                                                                                                                                                                                                                                                                                                                                                                                                                                                                                                                                                                                                                                                                                                                           | DOHMH PHL                                                          | New York City Public Health Laboratory                                                             | Jade Wang, et al.                                                                                                                                                             |
| EPI_ISL_1018012                                                                                                                                                                                                                                                                                                                                                                                                                                                                                                                                                                                                                                                                                                                                                                                                                                                                                                                                                                                                                                                                                                                                                                                                                                                                                                                                                                                                                                                                                                                                                                                           | DOHMH Jamaica                                                      | New York City Public Health Laboratory                                                             | Jade Wang, et al.                                                                                                                                                             |
| EPI_ISL_1018034, EPI_ISL_1018037, EPI_ISL_1018047                                                                                                                                                                                                                                                                                                                                                                                                                                                                                                                                                                                                                                                                                                                                                                                                                                                                                                                                                                                                                                                                                                                                                                                                                                                                                                                                                                                                                                                                                                                                                         | OCME Office Of Chief Medical Examiner                              | New York City Public Health Laboratory                                                             | Jade Wang, et al.                                                                                                                                                             |
| EPI_ISL_1020490, EPI_ISL_1020509, EPI_ISL_1020511, EPI_ISL_1020512, EPI_ISL_1020513                                                                                                                                                                                                                                                                                                                                                                                                                                                                                                                                                                                                                                                                                                                                                                                                                                                                                                                                                                                                                                                                                                                                                                                                                                                                                                                                                                                                                                                                                                                       | Columbia University Irving Medical Center                          | Wadsworth Center, New York State Department of Health                                              | Kirsten St. George, Daryl M. Lamson, Alexis Russel, Matthew Shudt, Melissa A Leisner, Jonathan Plitnick, Navjot Singh, John Kelly, Erasmus Schneider, Erica Lasek-Nesselquist |
| EPI_ISL_1020839, EPI_ISL_1020994, EPI_ISL_1037840                                                                                                                                                                                                                                                                                                                                                                                                                                                                                                                                                                                                                                                                                                                                                                                                                                                                                                                                                                                                                                                                                                                                                                                                                                                                                                                                                                                                                                                                                                                                                         | Laboratory Corporation of America                                  | Respiratory Viruses Branch, Division of Viral Diseases, Centers for Disease Control and Prevention | Peter W. Cook, Dakota Howard, Dhvani Batra, Ben L. Rambo-Martin, Clinton R. Paden, Suxiang Tong, Duncan MacCannell                                                            |
| EPI_ISL_1038995                                                                                                                                                                                                                                                                                                                                                                                                                                                                                                                                                                                                                                                                                                                                                                                                                                                                                                                                                                                                                                                                                                                                                                                                                                                                                                                                                                                                                                                                                                                                                                                           | Murphy Medical Associates                                          | Grubaugh Lab - Yale School of Public Health                                                        | Joseph Fauver, Tara Alpert, Anderson Brito, Mallery Breban, Anne Wylie, Chantal Vogels, Mary Petrone, Annie Watkins, Chaney Kalinich, Isabel Ott, Nathan Grubaugh             |
| EPI_ISL_1038997                                                                                                                                                                                                                                                                                                                                                                                                                                                                                                                                                                                                                                                                                                                                                                                                                                                                                                                                                                                                                                                                                                                                                                                                                                                                                                                                                                                                                                                                                                                                                                                           | Fair Haven CHC                                                     | Grubaugh Lab - Yale School of Public Health                                                        | Joseph Fauver, Tara Alpert, Anderson Brito, Mallery Breban, Anne Wylie, Chantal Vogels, Mary Petrone, Annie Watkins, Chaney Kalinich, Isabel Ott, Nathan Grubaugh             |
| EPI_ISL_1038998                                                                                                                                                                                                                                                                                                                                                                                                                                                                                                                                                                                                                                                                                                                                                                                                                                                                                                                                                                                                                                                                                                                                                                                                                                                                                                                                                                                                                                                                                                                                                                                           | Yale Pathology Lab                                                 | Grubaugh Lab - Yale School of Public Health                                                        | Joseph Fauver, Tara Alpert, Anderson Brito, Mallery Breban, Anne Wylie, Chantal Vogels, Mary Petrone, Annie Watkins, Chaney Kalinich, Isabel Ott, Nathan Grubaugh             |
| EPI_ISL_1040861, EPI_ISL_1040900                                                                                                                                                                                                                                                                                                                                                                                                                                                                                                                                                                                                                                                                                                                                                                                                                                                                                                                                                                                                                                                                                                                                                                                                                                                                                                                                                                                                                                                                                                                                                                          | NYU Langone Health                                                 | Departments of Pathology and Medicine, New York University School of Medicine                      | Adriana Heguy, Dacia Dimartino, Emily Guzman, Christian Marier, Peter Meyn, Sitharam Ramaswami, Gael Westby, Paul Zappile, Yutong Zhang, Paolo Cotzia, Guiqing Wang           |
| EPI_ISL_1041215, EPI_ISL_1041223, EPI_ISL_1041238, EPI_ISL_1041241, EPI_ISL_1041242, EPI_ISL_1041262, EPI_ISL_1041267, EPI_ISL_1041269, EPI_ISL_1041274, EPI_ISL_1041284, EPI_ISL_1041289, EPI_ISL_1041300, EPI_ISL_1041308, EPI_ISL_1041333, EPI_ISL_1041364, EPI_ISL_1041374, EPI_ISL_1041380, EPI_ISL_1041386, EPI_ISL_1041387, EPI_ISL_1041415, EPI_ISL_1041416, EPI_ISL_1041421, EPI_ISL_1041422, EPI_ISL_1041443, EPI_ISL_1041457, EPI_ISL_1041467, EPI_ISL_1041470, EPI_ISL_1041475, EPI_ISL_1041476, EPI_ISL_1041488, EPI_ISL_1041495, EPI_ISL_1041502, EPI_ISL_1041504, EPI_ISL_1041505, EPI_ISL_1041508, EPI_ISL_1041511, EPI_ISL_1041521, EPI_ISL_1041548, EPI_ISL_1041558, EPI_ISL_1041561, EPI_ISL_1041569, EPI_ISL_1041580, EPI_ISL_1041582, EPI_ISL_1041583, EPI_ISL_1041585, EPI_ISL_1041594, EPI_ISL_1041595, EPI_ISL_1041596, EPI_ISL_1041604, EPI_ISL_1041606, EPI_ISL_1041612, EPI_ISL_1041635, EPI_ISL_1041650, EPI_ISL_1041652, EPI_ISL_1041657, EPI_ISL_1041661, EPI_ISL_1041668, EPI_ISL_1041673, EPI_ISL_1041695, EPI_ISL_1041701, EPI_ISL_1041708, EPI_ISL_1041710, EPI_ISL_1041731, EPI_ISL_1041733, EPI_ISL_1041744, EPI_ISL_1041745, EPI_ISL_1041747, EPI_ISL_1041750, EPI_ISL_1041760, EPI_ISL_1041763, EPI_ISL_1041765, EPI_ISL_1041807, EPI_ISL_1041815, EPI_ISL_1041822, EPI_ISL_1041829, EPI_ISL_1041830, EPI_ISL_1041838, EPI_ISL_1041858, EPI_ISL_1041861, EPI_ISL_1041874, EPI_ISL_1041878, EPI_ISL_1041884, EPI_ISL_1041885, EPI_ISL_1041886, EPI_ISL_1041887, EPI_ISL_1041897, EPI_ISL_1041899, EPI_ISL_1041921, EPI_ISL_1041927, EPI_ISL_1041928, EPI_ISL_1041930 | see above                                                          | Pandemic Response Lab - NYC                                                                        | Henry Lee, Michael Hammerling, Melissa Hopkins, Cybill del Castillo, William Ward, Pradeep Bugga, Haiping Hao, Jon Laurent                                                    |
| EPI_ISL_1046773                                                                                                                                                                                                                                                                                                                                                                                                                                                                                                                                                                                                                                                                                                                                                                                                                                                                                                                                                                                                                                                                                                                                                                                                                                                                                                                                                                                                                                                                                                                                                                                           | SARS-CoV-2 testing team, National Institute of Infectious Diseases | Pathogen Genomics Center, National Institute of Infectious Diseases                                | Tsuyoshi Sekizuka, Kentaro Itokawa, Rina Tanaka, Masanori Hashino, Tadashi Kikuchi, Lucky Ronald Runtuwene, Shigeru Kusagawa, Makoto Kuroda                                   |
| EPI_ISL_1050039                                                                                                                                                                                                                                                                                                                                                                                                                                                                                                                                                                                                                                                                                                                                                                                                                                                                                                                                                                                                                                                                                                                                                                                                                                                                                                                                                                                                                                                                                                                                                                                           | NYU Langone Health                                                 | Departments of Pathology and Medicine, New York University School of Medicine                      | Adriana Heguy, Dacia Dimartino, Emily Guzman, Christian Marier, Peter Meyn, Sitharam Ramaswami, Gael Westby, Paul Zappile, Yutong Zhang, Paolo Cotzia, Guiqing Wang           |
| EPI_ISL_1059101                                                                                                                                                                                                                                                                                                                                                                                                                                                                                                                                                                                                                                                                                                                                                                                                                                                                                                                                                                                                                                                                                                                                                                                                                                                                                                                                                                                                                                                                                                                                                                                           | University of Michigan Clinical Microbiology Laboratory            | Lauring Lab, University of Michigan, Department of Microbiology and Immunology                     | Valesano                                                                                                                                                                      |
| EPI_ISL_1060772, EPI_ISL_1060780, EPI_ISL_1060782, EPI_ISL_1060784, EPI_ISL_1060785, EPI_ISL_1060788, EPI_ISL_1060800, EPI_ISL_1060801, EPI_ISL_1060802, EPI_ISL_1060804                                                                                                                                                                                                                                                                                                                                                                                                                                                                                                                                                                                                                                                                                                                                                                                                                                                                                                                                                                                                                                                                                                                                                                                                                                                                                                                                                                                                                                  | NJ Rapid Response Teams                                            | New Jersey Public Health Environmental Laboratories (NJ_PHEL)                                      | Lindsey Bodnar, Shiv Verma, Dana Woell, Byeong Jeong                                                                                                                          |
| EPI_ISL_1064764, EPI_ISL_1064770                                                                                                                                                                                                                                                                                                                                                                                                                                                                                                                                                                                                                                                                                                                                                                                                                                                                                                                                                                                                                                                                                                                                                                                                                                                                                                                                                                                                                                                                                                                                                                          | OCME Office Of Chief Medical Examiner                              | New York City Public Health Laboratory                                                             | Jade Wang, et al.                                                                                                                                                             |
| EPI_ISL_1064777                                                                                                                                                                                                                                                                                                                                                                                                                                                                                                                                                                                                                                                                                                                                                                                                                                                                                                                                                                                                                                                                                                                                                                                                                                                                                                                                                                                                                                                                                                                                                                                           | DOHMH Crown Heights                                                | New York City Public Health Laboratory                                                             | Jade Wang, et al.                                                                                                                                                             |
| EPI_ISL_1064801                                                                                                                                                                                                                                                                                                                                                                                                                                                                                                                                                                                                                                                                                                                                                                                                                                                                                                                                                                                                                                                                                                                                                                                                                                                                                                                                                                                                                                                                                                                                                                                           | DOHMH Morrisania                                                   | New York City Public Health Laboratory                                                             | Jade Wang, et al.                                                                                                                                                             |
| EPI_ISL_1064803                                                                                                                                                                                                                                                                                                                                                                                                                                                                                                                                                                                                                                                                                                                                                                                                                                                                                                                                                                                                                                                                                                                                                                                                                                                                                                                                                                                                                                                                                                                                                                                           | DOHMH Central Harlem                                               | New York City Public Health Laboratory                                                             | Jade Wang, et al.                                                                                                                                                             |
| EPI_ISL_1064804                                                                                                                                                                                                                                                                                                                                                                                                                                                                                                                                                                                                                                                                                                                                                                                                                                                                                                                                                                                                                                                                                                                                                                                                                                                                                                                                                                                                                                                                                                                                                                                           | OCME Office Of Chief Medical Examiner                              | New York City Public Health Laboratory                                                             | Jade Wang, et al.                                                                                                                                                             |
| EPI_ISL_1064807                                                                                                                                                                                                                                                                                                                                                                                                                                                                                                                                                                                                                                                                                                                                                                                                                                                                                                                                                                                                                                                                                                                                                                                                                                                                                                                                                                                                                                                                                                                                                                                           | DOHMH Jamaica                                                      | New York City Public Health Laboratory                                                             | Jade Wang, et al.                                                                                                                                                             |
| EPI_ISL_1064815, EPI_ISL_1064817                                                                                                                                                                                                                                                                                                                                                                                                                                                                                                                                                                                                                                                                                                                                                                                                                                                                                                                                                                                                                                                                                                                                                                                                                                                                                                                                                                                                                                                                                                                                                                          | OCME Office Of Chief Medical Examiner                              | New York City Public Health Laboratory                                                             | Jade Wang, et al.                                                                                                                                                             |
| EPI_ISL_1064823                                                                                                                                                                                                                                                                                                                                                                                                                                                                                                                                                                                                                                                                                                                                                                                                                                                                                                                                                                                                                                                                                                                                                                                                                                                                                                                                                                                                                                                                                                                                                                                           | DOHMH Riverside                                                    | New York City Public Health Laboratory                                                             | Jade Wang, et al.                                                                                                                                                             |
| EPI_ISL_1064824                                                                                                                                                                                                                                                                                                                                                                                                                                                                                                                                                                                                                                                                                                                                                                                                                                                                                                                                                                                                                                                                                                                                                                                                                                                                                                                                                                                                                                                                                                                                                                                           | DOHMH Crown Heights                                                | New York City Public Health Laboratory                                                             | Jade Wang, et al.                                                                                                                                                             |
| EPI_ISL_1064826                                                                                                                                                                                                                                                                                                                                                                                                                                                                                                                                                                                                                                                                                                                                                                                                                                                                                                                                                                                                                                                                                                                                                                                                                                                                                                                                                                                                                                                                                                                                                                                           | DOHMH PHL                                                          | New York City Public Health Laboratory                                                             | Jade Wang, et al.                                                                                                                                                             |
| EPI_ISL_1064831                                                                                                                                                                                                                                                                                                                                                                                                                                                                                                                                                                                                                                                                                                                                                                                                                                                                                                                                                                                                                                                                                                                                                                                                                                                                                                                                                                                                                                                                                                                                                                                           | DOHMH Central Harlem                                               | New York City Public Health Laboratory                                                             | Jade Wang, et al.                                                                                                                                                             |
| EPI_ISL_1064836                                                                                                                                                                                                                                                                                                                                                                                                                                                                                                                                                                                                                                                                                                                                                                                                                                                                                                                                                                                                                                                                                                                                                                                                                                                                                                                                                                                                                                                                                                                                                                                           | DOHMH Fort Greene                                                  | New York City Public Health Laboratory                                                             | Jade Wang, et al.                                                                                                                                                             |

|                                                                                                                                                                                                                                                                                                                                                                                                                                                                                                                                                                                                                                                                                                                                                                                                                                                                                                                                                                                                         |                                                                  |                                                                                                    |                                                                                                                                                                                                                                                                              |
|---------------------------------------------------------------------------------------------------------------------------------------------------------------------------------------------------------------------------------------------------------------------------------------------------------------------------------------------------------------------------------------------------------------------------------------------------------------------------------------------------------------------------------------------------------------------------------------------------------------------------------------------------------------------------------------------------------------------------------------------------------------------------------------------------------------------------------------------------------------------------------------------------------------------------------------------------------------------------------------------------------|------------------------------------------------------------------|----------------------------------------------------------------------------------------------------|------------------------------------------------------------------------------------------------------------------------------------------------------------------------------------------------------------------------------------------------------------------------------|
| EPI_ISL_1064837                                                                                                                                                                                                                                                                                                                                                                                                                                                                                                                                                                                                                                                                                                                                                                                                                                                                                                                                                                                         | DOHMH Jamaica                                                    | New York City Public Health Laboratory                                                             | Jade Wang, et al.                                                                                                                                                                                                                                                            |
| EPI_ISL_1064842                                                                                                                                                                                                                                                                                                                                                                                                                                                                                                                                                                                                                                                                                                                                                                                                                                                                                                                                                                                         | DOHMH Morrisania                                                 | New York City Public Health Laboratory                                                             | Jade Wang, et al.                                                                                                                                                                                                                                                            |
| EPI_ISL_1064843, EPI_ISL_1064846                                                                                                                                                                                                                                                                                                                                                                                                                                                                                                                                                                                                                                                                                                                                                                                                                                                                                                                                                                        | OCME Office Of Chief Medical Examiner                            | New York City Public Health Laboratory                                                             | Jade Wang, et al.                                                                                                                                                                                                                                                            |
| EPI_ISL_1064848                                                                                                                                                                                                                                                                                                                                                                                                                                                                                                                                                                                                                                                                                                                                                                                                                                                                                                                                                                                         | DOHMH Jamaica                                                    | New York City Public Health Laboratory                                                             | Jade Wang, et al.                                                                                                                                                                                                                                                            |
| EPI_ISL_1064849                                                                                                                                                                                                                                                                                                                                                                                                                                                                                                                                                                                                                                                                                                                                                                                                                                                                                                                                                                                         | DOHMH Morrisania                                                 | New York City Public Health Laboratory                                                             | Jade Wang, et al.                                                                                                                                                                                                                                                            |
| EPI_ISL_1064853, EPI_ISL_1064854, EPI_ISL_1064855                                                                                                                                                                                                                                                                                                                                                                                                                                                                                                                                                                                                                                                                                                                                                                                                                                                                                                                                                       | OCME Office Of Chief Medical Examiner                            | New York City Public Health Laboratory                                                             | Jade Wang, et al.                                                                                                                                                                                                                                                            |
| EPI_ISL_1064858                                                                                                                                                                                                                                                                                                                                                                                                                                                                                                                                                                                                                                                                                                                                                                                                                                                                                                                                                                                         | DOHMH Jamaica                                                    | New York City Public Health Laboratory                                                             | Jade Wang, et al.                                                                                                                                                                                                                                                            |
| EPI_ISL_1064863                                                                                                                                                                                                                                                                                                                                                                                                                                                                                                                                                                                                                                                                                                                                                                                                                                                                                                                                                                                         | OCME Office Of Chief Medical Examiner                            | New York City Public Health Laboratory                                                             | Jade Wang, et al.                                                                                                                                                                                                                                                            |
| EPI_ISL_1076611, EPI_ISL_1079543, EPI_ISL_1079930                                                                                                                                                                                                                                                                                                                                                                                                                                                                                                                                                                                                                                                                                                                                                                                                                                                                                                                                                       | Houston Methodist Hospital                                       | Houston Methodist Hospital                                                                         | S. Wesley Long, Randall J. Olsen, Paul A. Christensen, Sishir Subedi, Robert Olson, James J. Davis, Matthew Ojeda Saavedra, Prasanti Yerramilli, Layne Pruitt, Kristina Reppond, Madison N. Shyer, Jessica Cambria, Ilya J. Finkelstein, Jimmy Gollihar, and James M. Musser |
| EPI_ISL_1080350                                                                                                                                                                                                                                                                                                                                                                                                                                                                                                                                                                                                                                                                                                                                                                                                                                                                                                                                                                                         | NJ Rapid Response Teams                                          | NJ_PHEL                                                                                            | Lindsey Bodnar, Shiv Verma, Dana Woell, Byeong Jeong                                                                                                                                                                                                                         |
| EPI_ISL_1081297, EPI_ISL_1081298                                                                                                                                                                                                                                                                                                                                                                                                                                                                                                                                                                                                                                                                                                                                                                                                                                                                                                                                                                        | Wyoming Public Health Laboratory                                 | Wyoming Public Health Laboratory                                                                   | Jim Mildenberger, Wanda Manley, Noah Hull, Taylor Fearing, Lynette Gumbleton, Channing Weber, Ashley Norberg, Chayse Rowley, Marley Goetz, Brian Dominguez, Elliot Thomasson, Cari Sloma, and Rob Christensen                                                                |
| EPI_ISL_1087278, EPI_ISL_1087290, EPI_ISL_1087292, EPI_ISL_1087293, EPI_ISL_1087294, EPI_ISL_1087296, EPI_ISL_1087299                                                                                                                                                                                                                                                                                                                                                                                                                                                                                                                                                                                                                                                                                                                                                                                                                                                                                   | NYU Langone Health                                               | Departments of Pathology and Medicine, New York University School of Medicine                      | Adriana Heguy, Dacia Dimartino, Emily Guzman, Christian Marier, Peter Meyn, Sitharam Ramaswami, Gael Westby, Paul Zappile, Yutong Zhang, Paolo Cotzia, Guiqing Wang                                                                                                          |
| EPI_ISL_1091224                                                                                                                                                                                                                                                                                                                                                                                                                                                                                                                                                                                                                                                                                                                                                                                                                                                                                                                                                                                         | Croatian Institute of Public Health                              | Croatian Institute of Public Health                                                                | Irena Tabain, Ivana Ferenak                                                                                                                                                                                                                                                  |
| EPI_ISL_1092375, EPI_ISL_1092979, EPI_ISL_1092980                                                                                                                                                                                                                                                                                                                                                                                                                                                                                                                                                                                                                                                                                                                                                                                                                                                                                                                                                       | National Virus Reference Laboratory                              | National Virus Reference Laboratory                                                                | Zoe Yandle, Charlene Bennet, Gabriel Gonzalez, Michael Carr, Jonathan Dean, Cillian F De Gascun                                                                                                                                                                              |
| EPI_ISL_1094370                                                                                                                                                                                                                                                                                                                                                                                                                                                                                                                                                                                                                                                                                                                                                                                                                                                                                                                                                                                         | NYSDOH Wadsworth Center, Virology Lab                            | Respiratory Viruses Branch, Division of Viral Diseases, Centers for Disease Control and Prevention | Krista Queen, Yan Li, Ying Tao, Jing Zhang, Anna Uehara, Anna Montmayeur, Clinton R. Paden, Peter W. Cook, Rachel Marine, Mili Sheth, Jasmine Padilla, Sarah Nobles, Mark Burroughs, Lori Rowe, Haibin Wang, Ben L. Rambo-Martin, Dhvani Batra, Justin Lee, Suxiang Tong     |
| EPI_ISL_1097791, EPI_ISL_1097795, EPI_ISL_1097803, EPI_ISL_1097823, EPI_ISL_1097826, EPI_ISL_1097831, EPI_ISL_1097918, EPI_ISL_1097922, EPI_ISL_1097925, EPI_ISL_1097930, EPI_ISL_1097936, EPI_ISL_1097953, EPI_ISL_1098043, EPI_ISL_1098051, EPI_ISL_1098055, EPI_ISL_1098057, EPI_ISL_1098070, EPI_ISL_1098074, EPI_ISL_1098149, EPI_ISL_1098161, EPI_ISL_1098163, EPI_ISL_1098176, EPI_ISL_1098181, EPI_ISL_1098186, EPI_ISL_1098303, EPI_ISL_1098310, EPI_ISL_1098311, EPI_ISL_1098312, EPI_ISL_1098326, EPI_ISL_1098327, EPI_ISL_1098332, EPI_ISL_1098339, EPI_ISL_1098343, EPI_ISL_1098348, EPI_ISL_1098358, EPI_ISL_1098428, EPI_ISL_1098429, EPI_ISL_1098432, EPI_ISL_1098433, EPI_ISL_1098437, EPI_ISL_1098438, EPI_ISL_1098448, EPI_ISL_1098455, EPI_ISL_1098467, EPI_ISL_1098469, EPI_ISL_1098473, EPI_ISL_1098519, EPI_ISL_1098525, EPI_ISL_1098526, EPI_ISL_1098536, EPI_ISL_1098542, EPI_ISL_1098552, EPI_ISL_1098555, EPI_ISL_1098562, EPI_ISL_1098564, EPI_ISL_1098576, EPI_ISL_1098586 |                                                                  |                                                                                                    |                                                                                                                                                                                                                                                                              |
| see above                                                                                                                                                                                                                                                                                                                                                                                                                                                                                                                                                                                                                                                                                                                                                                                                                                                                                                                                                                                               | Pandemic Response Lab - NYC                                      | Pandemic Response Lab, R&D                                                                         | Henry Lee, Michael Hammerling, Melissa Hopkins, Cybill del Castillo, Shinyoung Clair Kang, William Ward, Pradeep Bugga, Haiping Hao, Jon Laurent                                                                                                                             |
| EPI_ISL_1098644, EPI_ISL_1098645                                                                                                                                                                                                                                                                                                                                                                                                                                                                                                                                                                                                                                                                                                                                                                                                                                                                                                                                                                        | Public Health Virology-Forensic and Scientific Services          | Public Health Virology-Forensic and Scientific Services                                            | Son Nguyen                                                                                                                                                                                                                                                                   |
| EPI_ISL_1109556, EPI_ISL_1109557                                                                                                                                                                                                                                                                                                                                                                                                                                                                                                                                                                                                                                                                                                                                                                                                                                                                                                                                                                        | "Dr. Andrija Stampar" Teaching Institute of Public Health        | Croatian Institute of Public Health                                                                | Irena Tabain, Ivana Ferenak                                                                                                                                                                                                                                                  |
| EPI_ISL_1111536, EPI_ISL_1111543, EPI_ISL_1111546                                                                                                                                                                                                                                                                                                                                                                                                                                                                                                                                                                                                                                                                                                                                                                                                                                                                                                                                                       | Wyoming Public Health Laboratory                                 | Wyoming Public Health Laboratory                                                                   | Jim Mildenberger, Wanda Manley, Noah Hull, Taylor Fearing, Lynette Gumbleton, Channing Weber, Ashley Norberg, Chayse Rowley, Marley Goetz, Brian Dominguez, Elliot Thomasson, Cari Sloma, and Rob Christensen                                                                |
| EPI_ISL_1113148, EPI_ISL_1113149                                                                                                                                                                                                                                                                                                                                                                                                                                                                                                                                                                                                                                                                                                                                                                                                                                                                                                                                                                        | NJ Rapid Response Teams                                          | New Jersey Public Health and Environmental Laboratories (PHEL)                                     | Lindsey Bodnar, Shiv Verma, Dana Woell, Byeong Jeong                                                                                                                                                                                                                         |
| EPI_ISL_1114471                                                                                                                                                                                                                                                                                                                                                                                                                                                                                                                                                                                                                                                                                                                                                                                                                                                                                                                                                                                         | Department of Health and Mental Hygiene Central Harlem           | New York City Public Health Laboratory                                                             | Jade Wang, et al.                                                                                                                                                                                                                                                            |
| EPI_ISL_1114474                                                                                                                                                                                                                                                                                                                                                                                                                                                                                                                                                                                                                                                                                                                                                                                                                                                                                                                                                                                         | Department of Health and Mental Hygiene Corona                   | New York City Public Health Laboratory                                                             | Jade Wang, et al.                                                                                                                                                                                                                                                            |
| EPI_ISL_1114478                                                                                                                                                                                                                                                                                                                                                                                                                                                                                                                                                                                                                                                                                                                                                                                                                                                                                                                                                                                         | Department of Health and Mental Hygiene Jamaica                  | New York City Public Health Laboratory                                                             | Jade Wang, et al.                                                                                                                                                                                                                                                            |
| EPI_ISL_1114482                                                                                                                                                                                                                                                                                                                                                                                                                                                                                                                                                                                                                                                                                                                                                                                                                                                                                                                                                                                         | Department of Health and Mental Hygiene Public Health Laboratory | New York City Public Health Laboratory                                                             | Jade Wang, et al.                                                                                                                                                                                                                                                            |
| EPI_ISL_1114495                                                                                                                                                                                                                                                                                                                                                                                                                                                                                                                                                                                                                                                                                                                                                                                                                                                                                                                                                                                         | Department of Health and Mental Hygiene Fort Greene              | New York City Public Health Laboratory                                                             | Jade Wang, et al.                                                                                                                                                                                                                                                            |
| EPI_ISL_1114499, EPI_ISL_1114502                                                                                                                                                                                                                                                                                                                                                                                                                                                                                                                                                                                                                                                                                                                                                                                                                                                                                                                                                                        | Department of Health and Mental Hygiene Crown Heights            | New York City Public Health Laboratory                                                             | Jade Wang, et al.                                                                                                                                                                                                                                                            |
| EPI_ISL_1114515                                                                                                                                                                                                                                                                                                                                                                                                                                                                                                                                                                                                                                                                                                                                                                                                                                                                                                                                                                                         | Department of Health and Mental Hygiene Corona                   | New York City Public Health Laboratory                                                             | Jade Wang, et al.                                                                                                                                                                                                                                                            |
| EPI_ISL_1114516, EPI_ISL_1114517                                                                                                                                                                                                                                                                                                                                                                                                                                                                                                                                                                                                                                                                                                                                                                                                                                                                                                                                                                        | Department of Health and Mental Hygiene Crown Heights            | New York City Public Health Laboratory                                                             | Jade Wang, et al.                                                                                                                                                                                                                                                            |
| EPI_ISL_1114521                                                                                                                                                                                                                                                                                                                                                                                                                                                                                                                                                                                                                                                                                                                                                                                                                                                                                                                                                                                         | Department of Health and Mental Hygiene Public Health Laboratory | New York City Public Health Laboratory                                                             | Jade Wang, et al.                                                                                                                                                                                                                                                            |
| EPI_ISL_1114524                                                                                                                                                                                                                                                                                                                                                                                                                                                                                                                                                                                                                                                                                                                                                                                                                                                                                                                                                                                         | Department of Health and Mental Hygiene Chelsea                  | New York City Public Health Laboratory                                                             | Jade Wang, et al.                                                                                                                                                                                                                                                            |
| EPI_ISL_1114525                                                                                                                                                                                                                                                                                                                                                                                                                                                                                                                                                                                                                                                                                                                                                                                                                                                                                                                                                                                         | OCME Office Of Chief Medical Examiner                            | New York City Public Health Laboratory                                                             | Jade Wang, et al.                                                                                                                                                                                                                                                            |
| EPI_ISL_1116510, EPI_ISL_1116514, EPI_ISL_1116516, EPI_ISL_1116517, EPI_ISL_1116518, EPI_ISL_1116519, EPI_ISL_1116520, EPI_ISL_1116526, EPI_ISL_1116527, EPI_ISL_1116529, EPI_ISL_1116531                                                                                                                                                                                                                                                                                                                                                                                                                                                                                                                                                                                                                                                                                                                                                                                                               | NYU Langone Health                                               | Departments of Pathology and Medicine, New York University School of Medicine                      | Adriana Heguy, Dacia Dimartino, Emily Guzman, Christian Marier, Peter Meyn, Sitharam Ramaswami, Gael Westby, Paul Zappile, Yutong Zhang, Paolo Cotzia, Guiqing Wang                                                                                                          |
| see above                                                                                                                                                                                                                                                                                                                                                                                                                                                                                                                                                                                                                                                                                                                                                                                                                                                                                                                                                                                               | NYU Langone Health                                               | Departments of Pathology and Medicine, New York University School of Medicine                      | Adriana Heguy, Dacia Dimartino, Emily Guzman, Christian Marier, Peter Meyn, Sitharam Ramaswami, Gael Westby, Paul Zappile, Yutong Zhang, Paolo Cotzia, Guiqing Wang                                                                                                          |
| EPI_ISL_1121020                                                                                                                                                                                                                                                                                                                                                                                                                                                                                                                                                                                                                                                                                                                                                                                                                                                                                                                                                                                         | Wyoming Public Health Laboratory                                 | Wyoming Public Health Laboratory                                                                   | Jim Mildenberger, Wanda Manley, Noah Hull, Taylor Fearing, Lynette Gumbleton, Channing Weber, Ashley Norberg, Chayse Rowley, Marley Goetz, Brian Dominguez, Elliot Thomasson, Cari Sloma, and Rob Christensen                                                                |
| EPI_ISL_1121888                                                                                                                                                                                                                                                                                                                                                                                                                                                                                                                                                                                                                                                                                                                                                                                                                                                                                                                                                                                         | Department of Health & Mental Hygiene Morrisania                 | New York City Public Health Laboratory                                                             | Jade Wang, et al.                                                                                                                                                                                                                                                            |
| EPI_ISL_1121889                                                                                                                                                                                                                                                                                                                                                                                                                                                                                                                                                                                                                                                                                                                                                                                                                                                                                                                                                                                         | Department of Health & Mental Hygiene Fort Greene                | New York City Public Health Laboratory                                                             | Jade Wang, et al.                                                                                                                                                                                                                                                            |
| EPI_ISL_1121892, EPI_ISL_1121904                                                                                                                                                                                                                                                                                                                                                                                                                                                                                                                                                                                                                                                                                                                                                                                                                                                                                                                                                                        | Department of Health & Mental Hygiene Crown Heights              | New York City Public Health Laboratory                                                             | Jade Wang, et al.                                                                                                                                                                                                                                                            |
| EPI_ISL_1121906                                                                                                                                                                                                                                                                                                                                                                                                                                                                                                                                                                                                                                                                                                                                                                                                                                                                                                                                                                                         | Department of Health & Mental Hygiene Corona                     | New York City Public Health Laboratory                                                             | Jade Wang, et al.                                                                                                                                                                                                                                                            |
| EPI_ISL_1121910, EPI_ISL_1121911                                                                                                                                                                                                                                                                                                                                                                                                                                                                                                                                                                                                                                                                                                                                                                                                                                                                                                                                                                        | Department of Health & Mental Hygiene PHL                        | New York City Public Health Laboratory                                                             | Jade Wang, et al.                                                                                                                                                                                                                                                            |
| EPI_ISL_1121919, EPI_ISL_1121921                                                                                                                                                                                                                                                                                                                                                                                                                                                                                                                                                                                                                                                                                                                                                                                                                                                                                                                                                                        | Department of Health & Mental Hygiene Morrisania                 | New York City Public Health Laboratory                                                             | Jade Wang, et al.                                                                                                                                                                                                                                                            |
| EPI_ISL_1121929                                                                                                                                                                                                                                                                                                                                                                                                                                                                                                                                                                                                                                                                                                                                                                                                                                                                                                                                                                                         | Department of Health & Mental Hygiene PHL                        | New York City Public Health Laboratory                                                             | Jade Wang, et al.                                                                                                                                                                                                                                                            |
| EPI_ISL_1121940                                                                                                                                                                                                                                                                                                                                                                                                                                                                                                                                                                                                                                                                                                                                                                                                                                                                                                                                                                                         | Department of Health & Mental Hygiene Morrisania                 | New York City Public Health Laboratory                                                             | Jade Wang, et al.                                                                                                                                                                                                                                                            |
| EPI_ISL_1121950                                                                                                                                                                                                                                                                                                                                                                                                                                                                                                                                                                                                                                                                                                                                                                                                                                                                                                                                                                                         | Department of Health & Mental Hygiene Central Harlem             | New York City Public Health Laboratory                                                             | Jade Wang, et al.                                                                                                                                                                                                                                                            |
| EPI_ISL_1121953, EPI_ISL_1121956                                                                                                                                                                                                                                                                                                                                                                                                                                                                                                                                                                                                                                                                                                                                                                                                                                                                                                                                                                        | Department of Health & Mental Hygiene Jamaica                    | New York City Public Health Laboratory                                                             | Jade Wang, et al.                                                                                                                                                                                                                                                            |

|                                                                                                                                                                                                                                                                                                                                                                                                                                                                                                                                                                                                                                                                                                                                                                                                                                                                                                                                                                                                                                                                                                                                                                                                                                                                                                                                                                                                                                                                                                                                                                                                                                                                                                                                                                                                                                                                                                                                                                                                                                                                                                                                                                                                                                                                                                                                                                                                                                                                                                                                                                                                                                                                                                                                                                                                                                                                                                                                                                                                                                                                                                                                                                                                                                                                                                                                                                                                                                                   |                                                                                                                                                                |                                                                                                    |                                                                                                                                                                                                                                                                                                                                                                                                                                                                                                                                                                                                                                                                                                                                                                                                                                                                                                         |
|---------------------------------------------------------------------------------------------------------------------------------------------------------------------------------------------------------------------------------------------------------------------------------------------------------------------------------------------------------------------------------------------------------------------------------------------------------------------------------------------------------------------------------------------------------------------------------------------------------------------------------------------------------------------------------------------------------------------------------------------------------------------------------------------------------------------------------------------------------------------------------------------------------------------------------------------------------------------------------------------------------------------------------------------------------------------------------------------------------------------------------------------------------------------------------------------------------------------------------------------------------------------------------------------------------------------------------------------------------------------------------------------------------------------------------------------------------------------------------------------------------------------------------------------------------------------------------------------------------------------------------------------------------------------------------------------------------------------------------------------------------------------------------------------------------------------------------------------------------------------------------------------------------------------------------------------------------------------------------------------------------------------------------------------------------------------------------------------------------------------------------------------------------------------------------------------------------------------------------------------------------------------------------------------------------------------------------------------------------------------------------------------------------------------------------------------------------------------------------------------------------------------------------------------------------------------------------------------------------------------------------------------------------------------------------------------------------------------------------------------------------------------------------------------------------------------------------------------------------------------------------------------------------------------------------------------------------------------------------------------------------------------------------------------------------------------------------------------------------------------------------------------------------------------------------------------------------------------------------------------------------------------------------------------------------------------------------------------------------------------------------------------------------------------------------------------------|----------------------------------------------------------------------------------------------------------------------------------------------------------------|----------------------------------------------------------------------------------------------------|---------------------------------------------------------------------------------------------------------------------------------------------------------------------------------------------------------------------------------------------------------------------------------------------------------------------------------------------------------------------------------------------------------------------------------------------------------------------------------------------------------------------------------------------------------------------------------------------------------------------------------------------------------------------------------------------------------------------------------------------------------------------------------------------------------------------------------------------------------------------------------------------------------|
| EPI_ISL_1137499, EPI_ISL_1137500                                                                                                                                                                                                                                                                                                                                                                                                                                                                                                                                                                                                                                                                                                                                                                                                                                                                                                                                                                                                                                                                                                                                                                                                                                                                                                                                                                                                                                                                                                                                                                                                                                                                                                                                                                                                                                                                                                                                                                                                                                                                                                                                                                                                                                                                                                                                                                                                                                                                                                                                                                                                                                                                                                                                                                                                                                                                                                                                                                                                                                                                                                                                                                                                                                                                                                                                                                                                                  | New Jersey Department of Health, Public Health and Environmental Laboratories                                                                                  | New Jersey Public Health and Environmental Laboratories                                            | Lindsey Bodnar, Shiv K. Verma, Dana Woell, Byeong Jeong                                                                                                                                                                                                                                                                                                                                                                                                                                                                                                                                                                                                                                                                                                                                                                                                                                                 |
| EPI_ISL_1153659                                                                                                                                                                                                                                                                                                                                                                                                                                                                                                                                                                                                                                                                                                                                                                                                                                                                                                                                                                                                                                                                                                                                                                                                                                                                                                                                                                                                                                                                                                                                                                                                                                                                                                                                                                                                                                                                                                                                                                                                                                                                                                                                                                                                                                                                                                                                                                                                                                                                                                                                                                                                                                                                                                                                                                                                                                                                                                                                                                                                                                                                                                                                                                                                                                                                                                                                                                                                                                   | MVZ Labor Dr. Fenner und Kollegen (Standort Hamburg)                                                                                                           | Robert Koch Institute                                                                              | unknown                                                                                                                                                                                                                                                                                                                                                                                                                                                                                                                                                                                                                                                                                                                                                                                                                                                                                                 |
| EPI_ISL_1157425                                                                                                                                                                                                                                                                                                                                                                                                                                                                                                                                                                                                                                                                                                                                                                                                                                                                                                                                                                                                                                                                                                                                                                                                                                                                                                                                                                                                                                                                                                                                                                                                                                                                                                                                                                                                                                                                                                                                                                                                                                                                                                                                                                                                                                                                                                                                                                                                                                                                                                                                                                                                                                                                                                                                                                                                                                                                                                                                                                                                                                                                                                                                                                                                                                                                                                                                                                                                                                   | Northwestern Memorial Hospital                                                                                                                                 | Northwestern University - Ozer Lab                                                                 | Ramon Lorenzo-Redondo, Lacy M. Simons, Taylor J. Dean, Chad J. Achenbach, Lawrence J. Jennings, Chao Qi, Michael G. Ison, Judd F. Hultquist, Egon A. Ozer                                                                                                                                                                                                                                                                                                                                                                                                                                                                                                                                                                                                                                                                                                                                               |
| EPI_ISL_1158070                                                                                                                                                                                                                                                                                                                                                                                                                                                                                                                                                                                                                                                                                                                                                                                                                                                                                                                                                                                                                                                                                                                                                                                                                                                                                                                                                                                                                                                                                                                                                                                                                                                                                                                                                                                                                                                                                                                                                                                                                                                                                                                                                                                                                                                                                                                                                                                                                                                                                                                                                                                                                                                                                                                                                                                                                                                                                                                                                                                                                                                                                                                                                                                                                                                                                                                                                                                                                                   | Michigan Department of Health and Human Services, Bureau of Laboratories                                                                                       | Michigan Department of Health and Human Services, Bureau of Laboratories                           | Blankenship HM, Riner D, Soehnlén MK                                                                                                                                                                                                                                                                                                                                                                                                                                                                                                                                                                                                                                                                                                                                                                                                                                                                    |
| EPI_ISL_1160452, EPI_ISL_1160546, EPI_ISL_1160662, EPI_ISL_1162392, EPI_ISL_1162393, EPI_ISL_1162860                                                                                                                                                                                                                                                                                                                                                                                                                                                                                                                                                                                                                                                                                                                                                                                                                                                                                                                                                                                                                                                                                                                                                                                                                                                                                                                                                                                                                                                                                                                                                                                                                                                                                                                                                                                                                                                                                                                                                                                                                                                                                                                                                                                                                                                                                                                                                                                                                                                                                                                                                                                                                                                                                                                                                                                                                                                                                                                                                                                                                                                                                                                                                                                                                                                                                                                                              | Laboratory Corporation of America                                                                                                                              | Respiratory Viruses Branch, Division of Viral Diseases, Centers for Disease Control and Prevention | Peter W. Cook, Dakota Howard, Dhvani Batra, Ben L. Rambo-Martin, Minoo Agarwal, Eyad Almasri Debbie Boles, Ayla Burns, Nuthawin Charoensri, Oren Cohen, Susan Countryman, Mary Ann Cristobal, Bobbi Croy, Suzanne Dale, Hrushikesh Deshmukh, Amanda Douglas, Vincent Drouillon, Marcia Eisenberg, Howard Engler, Rama Ghatti, Prashant Gupta, Susan Hicks, Jake Humphrey, Lax Iyer, Manoj Jain, Mohan Kolli, Brian Krueger, Tim Kuphal, Stanley Letovsky, Michael Levandoski, Craig Lukasik, Jonathan Meltzer, Brian Norvell, Mindy Nye, Scott Parker, Christos Petropoulos, John Pruitt, Steven Ragan, Scott Ryan, Mike Sapeta, Jana Schroth, Suresh Babu Selvaraju, Goran Stevovic, Amanda Suchanek, Andrea Throop, Lyndon Tilson, Thomas Urban, Joe Voshell, Kimberly Wagner, Jonathan Williams, Mary Williamson, Qian Zeng, Tricia Zwiefelhofer, Clinton R. Paden, Suxiang Tong, Duncan MacCannell  |
| EPI_ISL_1163684, EPI_ISL_1163685, EPI_ISL_1163686                                                                                                                                                                                                                                                                                                                                                                                                                                                                                                                                                                                                                                                                                                                                                                                                                                                                                                                                                                                                                                                                                                                                                                                                                                                                                                                                                                                                                                                                                                                                                                                                                                                                                                                                                                                                                                                                                                                                                                                                                                                                                                                                                                                                                                                                                                                                                                                                                                                                                                                                                                                                                                                                                                                                                                                                                                                                                                                                                                                                                                                                                                                                                                                                                                                                                                                                                                                                 | Yale Clinical Virology Lab                                                                                                                                     | Grubaugh Lab - Yale School of Public Health                                                        | Joseph Fauver, Tara Alpert, Anderson Brito, Mallery Breban, Anne Wylie, Chantal Vogels, Mary Petrone, Annie Watkins, Chaney Kalinich, Isabel Ott, Nathan Grubaugh                                                                                                                                                                                                                                                                                                                                                                                                                                                                                                                                                                                                                                                                                                                                       |
| EPI_ISL_1164075                                                                                                                                                                                                                                                                                                                                                                                                                                                                                                                                                                                                                                                                                                                                                                                                                                                                                                                                                                                                                                                                                                                                                                                                                                                                                                                                                                                                                                                                                                                                                                                                                                                                                                                                                                                                                                                                                                                                                                                                                                                                                                                                                                                                                                                                                                                                                                                                                                                                                                                                                                                                                                                                                                                                                                                                                                                                                                                                                                                                                                                                                                                                                                                                                                                                                                                                                                                                                                   | National Virus Reference Laboratory                                                                                                                            | National Virus Reference Laboratory                                                                | Zoe Yandle, Charlene Bennet, Gabriel Gonzalez, Michael Carr, Jonathan Dean, Cillian F De Gascun                                                                                                                                                                                                                                                                                                                                                                                                                                                                                                                                                                                                                                                                                                                                                                                                         |
| EPI_ISL_1164355                                                                                                                                                                                                                                                                                                                                                                                                                                                                                                                                                                                                                                                                                                                                                                                                                                                                                                                                                                                                                                                                                                                                                                                                                                                                                                                                                                                                                                                                                                                                                                                                                                                                                                                                                                                                                                                                                                                                                                                                                                                                                                                                                                                                                                                                                                                                                                                                                                                                                                                                                                                                                                                                                                                                                                                                                                                                                                                                                                                                                                                                                                                                                                                                                                                                                                                                                                                                                                   | National Public Health Laboratory, National Centre for Infectious Diseases                                                                                     | National Public Health Laboratory, National Centre for Infectious Diseases                         | Tze Minn Mak, Zhenyang Zhou, Lin Cui, Raymond Tzer Pin Lin                                                                                                                                                                                                                                                                                                                                                                                                                                                                                                                                                                                                                                                                                                                                                                                                                                              |
| EPI_ISL_1164855                                                                                                                                                                                                                                                                                                                                                                                                                                                                                                                                                                                                                                                                                                                                                                                                                                                                                                                                                                                                                                                                                                                                                                                                                                                                                                                                                                                                                                                                                                                                                                                                                                                                                                                                                                                                                                                                                                                                                                                                                                                                                                                                                                                                                                                                                                                                                                                                                                                                                                                                                                                                                                                                                                                                                                                                                                                                                                                                                                                                                                                                                                                                                                                                                                                                                                                                                                                                                                   | Diagnostic Genomics Lab and Functional Genomics Core University of South Carolina                                                                              | Diagnostic Genomics Lab and Functional Genomics Core, University of South Carolina                 | Carolyn Banister, Hao Ji, Diego Altomare, Herr Doktor Professor Genomiklaborsdirektor Universitätskovidienpandemieretter Phillip Buckhaults, Michael Shtutman, Helmut Albrecht                                                                                                                                                                                                                                                                                                                                                                                                                                                                                                                                                                                                                                                                                                                          |
| EPI_ISL_1168237                                                                                                                                                                                                                                                                                                                                                                                                                                                                                                                                                                                                                                                                                                                                                                                                                                                                                                                                                                                                                                                                                                                                                                                                                                                                                                                                                                                                                                                                                                                                                                                                                                                                                                                                                                                                                                                                                                                                                                                                                                                                                                                                                                                                                                                                                                                                                                                                                                                                                                                                                                                                                                                                                                                                                                                                                                                                                                                                                                                                                                                                                                                                                                                                                                                                                                                                                                                                                                   | TXDSHS                                                                                                                                                         | TXDSHS                                                                                             | Rashmi Tuladhar, Bonnie Oh, Jenny Zhang, Maliha Rahman, Mayela Pedruza, Anita Pokharel, Myong Koag, Chun Wang, Rachel Lee, Grace Kubin                                                                                                                                                                                                                                                                                                                                                                                                                                                                                                                                                                                                                                                                                                                                                                  |
| EPI_ISL_1168763, EPI_ISL_1168764                                                                                                                                                                                                                                                                                                                                                                                                                                                                                                                                                                                                                                                                                                                                                                                                                                                                                                                                                                                                                                                                                                                                                                                                                                                                                                                                                                                                                                                                                                                                                                                                                                                                                                                                                                                                                                                                                                                                                                                                                                                                                                                                                                                                                                                                                                                                                                                                                                                                                                                                                                                                                                                                                                                                                                                                                                                                                                                                                                                                                                                                                                                                                                                                                                                                                                                                                                                                                  | Yale Pathology Lab                                                                                                                                             | Grubaugh Lab - Yale School of Public Health                                                        | Tara Alpert, Joseph Fauver, Chen Liu, Pei Hui, Jianhui Wang, Susan Bell and Han Zhou, Anderson Brito, Mallery Breban, Anne Wylie, Chantal Vogels, Mary Petrone, Chaney Kalinich, Isabel Ott, Arnau Casanovas, Catherine Muenker, Adam Moore, Alice Lu, Maria Tokuyama, Patrick Wong, Peiwen Lu, Saad Omer, Richard Martinello, Allison Nelson, Shelli Farhadian, Akiko Iwasaki, Charlese Dela Cruz, Albert Ko, Nathan Grubaugh                                                                                                                                                                                                                                                                                                                                                                                                                                                                          |
| EPI_ISL_1172116, EPI_ISL_1172121, EPI_ISL_1172128, EPI_ISL_1172132, EPI_ISL_1172134, EPI_ISL_1172141, EPI_ISL_1172144, EPI_ISL_1172147, EPI_ISL_1172148, EPI_ISL_1172149, EPI_ISL_1172158, EPI_ISL_1172166, EPI_ISL_1172170, EPI_ISL_1172176, EPI_ISL_1172189, EPI_ISL_1172190, EPI_ISL_1172194, EPI_ISL_1172209, EPI_ISL_1172213, EPI_ISL_1172219, EPI_ISL_1172220, EPI_ISL_1172236, EPI_ISL_1172246, EPI_ISL_1172247, EPI_ISL_1172250, EPI_ISL_1172254, EPI_ISL_1172269, EPI_ISL_1172276, EPI_ISL_1172287, EPI_ISL_1172295, EPI_ISL_1172296, EPI_ISL_1172299, EPI_ISL_1172300, EPI_ISL_1172309, EPI_ISL_1172313, EPI_ISL_1172316, EPI_ISL_1172331, EPI_ISL_1172333, EPI_ISL_1172336, EPI_ISL_1172341, EPI_ISL_1172347, EPI_ISL_1172348, EPI_ISL_1172378, EPI_ISL_1172391, EPI_ISL_1172397, EPI_ISL_1172399, EPI_ISL_1172405, EPI_ISL_1172412, EPI_ISL_1172409, EPI_ISL_1172419, EPI_ISL_1172433, EPI_ISL_1172438, EPI_ISL_1172439, EPI_ISL_1172441, EPI_ISL_1172450, EPI_ISL_1172451, EPI_ISL_1172452, EPI_ISL_1172454, EPI_ISL_1172456, EPI_ISL_1172460, EPI_ISL_1172471, EPI_ISL_1172472, EPI_ISL_1172482, EPI_ISL_1172485, EPI_ISL_1172486, EPI_ISL_1172490, EPI_ISL_1172494, EPI_ISL_1172502, EPI_ISL_1172505, EPI_ISL_1172508, EPI_ISL_1172514, EPI_ISL_1172533, EPI_ISL_1172541, EPI_ISL_1172542, EPI_ISL_1172567, EPI_ISL_1172563, EPI_ISL_1172575, EPI_ISL_1172576, EPI_ISL_1172578, EPI_ISL_1172588, EPI_ISL_1172590, EPI_ISL_1172591, EPI_ISL_1172592, EPI_ISL_1172595, EPI_ISL_1172596, EPI_ISL_1172597, EPI_ISL_1172605, EPI_ISL_1172606, EPI_ISL_1172609, EPI_ISL_1172611, EPI_ISL_1172615, EPI_ISL_1172622, EPI_ISL_1172626, EPI_ISL_1172647, EPI_ISL_1172654, EPI_ISL_1172659, EPI_ISL_1172660, EPI_ISL_1172663, EPI_ISL_1172665, EPI_ISL_1172679, EPI_ISL_1172694, EPI_ISL_1172701, EPI_ISL_1172722, EPI_ISL_1172725, EPI_ISL_1172726, EPI_ISL_1172736, EPI_ISL_1172738, EPI_ISL_1172742, EPI_ISL_1172746, EPI_ISL_1172747, EPI_ISL_1172748, EPI_ISL_1172749, EPI_ISL_1172753, EPI_ISL_1172759, EPI_ISL_1172763, EPI_ISL_1172769, EPI_ISL_1172775, EPI_ISL_1172780, EPI_ISL_1172782, EPI_ISL_1172785, EPI_ISL_1172804, EPI_ISL_1172806, EPI_ISL_1172807, EPI_ISL_1172808, EPI_ISL_1172810, EPI_ISL_1172811, EPI_ISL_1172814, EPI_ISL_1172815, EPI_ISL_1172817, EPI_ISL_1172825, EPI_ISL_1172833, EPI_ISL_1172838, EPI_ISL_1172843, EPI_ISL_1172846, EPI_ISL_1172847, EPI_ISL_1172850, EPI_ISL_1172851, EPI_ISL_1172856, EPI_ISL_1172859, EPI_ISL_1172869, EPI_ISL_1172875, EPI_ISL_1172881, EPI_ISL_1172886, EPI_ISL_1172892, EPI_ISL_1172900, EPI_ISL_1172903, EPI_ISL_1172912, EPI_ISL_1172919, EPI_ISL_1172922, EPI_ISL_1172924, EPI_ISL_1172925, EPI_ISL_1172931, EPI_ISL_1172941, EPI_ISL_1172944, EPI_ISL_1172945, EPI_ISL_1172946, EPI_ISL_1172949, EPI_ISL_1172970, EPI_ISL_1172972, EPI_ISL_1172973, EPI_ISL_1172978, EPI_ISL_1172981, EPI_ISL_1172982, EPI_ISL_1172983, EPI_ISL_1172989, EPI_ISL_1172995, EPI_ISL_1173002, EPI_ISL_1173009, EPI_ISL_1173016, EPI_ISL_1173024, EPI_ISL_1173044, EPI_ISL_1173054, EPI_ISL_1173058, EPI_ISL_1173061, EPI_ISL_1173067, EPI_ISL_1173073, EPI_ISL_1173075, EPI_ISL_1173076, EPI_ISL_1173080, EPI_ISL_1173083, EPI_ISL_1173100, EPI_ISL_1173105, EPI_ISL_1173107, EPI_ISL_1173109, EPI_ISL_1173110, EPI_ISL_1173120, EPI_ISL_1173123, EPI_ISL_1173127, EPI_ISL_1173130, EPI_ISL_1173139, EPI_ISL_1173144, EPI_ISL_1173149, EPI_ISL_1173151, EPI_ISL_1173152, EPI_ISL_1173157 | Henry Lee, Michael Hammerling, Melissa Hopkins, Cybill del Castillo, Shinyoung Clair Kang, William Ward, Pradeep Bugga, Haiping Hao, Jon Laurent Gregory Hovan |                                                                                                    |                                                                                                                                                                                                                                                                                                                                                                                                                                                                                                                                                                                                                                                                                                                                                                                                                                                                                                         |
| see above                                                                                                                                                                                                                                                                                                                                                                                                                                                                                                                                                                                                                                                                                                                                                                                                                                                                                                                                                                                                                                                                                                                                                                                                                                                                                                                                                                                                                                                                                                                                                                                                                                                                                                                                                                                                                                                                                                                                                                                                                                                                                                                                                                                                                                                                                                                                                                                                                                                                                                                                                                                                                                                                                                                                                                                                                                                                                                                                                                                                                                                                                                                                                                                                                                                                                                                                                                                                                                         | Pandemic Response Lab - NYC                                                                                                                                    | Pandemic Response Lab, R&D                                                                         | Henry Lee, Michael Hammerling, Melissa Hopkins, Cybill del Castillo, Shinyoung Clair Kang, William Ward, Pradeep Bugga, Haiping Hao, Jon Laurent Gregory Hovan                                                                                                                                                                                                                                                                                                                                                                                                                                                                                                                                                                                                                                                                                                                                          |
| EPI_ISL_1181668                                                                                                                                                                                                                                                                                                                                                                                                                                                                                                                                                                                                                                                                                                                                                                                                                                                                                                                                                                                                                                                                                                                                                                                                                                                                                                                                                                                                                                                                                                                                                                                                                                                                                                                                                                                                                                                                                                                                                                                                                                                                                                                                                                                                                                                                                                                                                                                                                                                                                                                                                                                                                                                                                                                                                                                                                                                                                                                                                                                                                                                                                                                                                                                                                                                                                                                                                                                                                                   | DPHL                                                                                                                                                           | Delaware Public Health Lab                                                                         | Gregory Hovan                                                                                                                                                                                                                                                                                                                                                                                                                                                                                                                                                                                                                                                                                                                                                                                                                                                                                           |
| EPI_ISL_1182022                                                                                                                                                                                                                                                                                                                                                                                                                                                                                                                                                                                                                                                                                                                                                                                                                                                                                                                                                                                                                                                                                                                                                                                                                                                                                                                                                                                                                                                                                                                                                                                                                                                                                                                                                                                                                                                                                                                                                                                                                                                                                                                                                                                                                                                                                                                                                                                                                                                                                                                                                                                                                                                                                                                                                                                                                                                                                                                                                                                                                                                                                                                                                                                                                                                                                                                                                                                                                                   | Yale Clinical Virology Lab                                                                                                                                     | Grubaugh Lab - Yale School of Public Health                                                        | Joseph Fauver, Mallery Breban, Isabell Ott, Tara Alpert, Mary Petrone, Anderson Brito, Chantal Vogels, Annie Watkins, Chaney Kalinich, Marie L. Landry, Nathan Grubaugh                                                                                                                                                                                                                                                                                                                                                                                                                                                                                                                                                                                                                                                                                                                                 |
| EPI_ISL_1184102, EPI_ISL_1184103, EPI_ISL_1184106, EPI_ISL_1184109                                                                                                                                                                                                                                                                                                                                                                                                                                                                                                                                                                                                                                                                                                                                                                                                                                                                                                                                                                                                                                                                                                                                                                                                                                                                                                                                                                                                                                                                                                                                                                                                                                                                                                                                                                                                                                                                                                                                                                                                                                                                                                                                                                                                                                                                                                                                                                                                                                                                                                                                                                                                                                                                                                                                                                                                                                                                                                                                                                                                                                                                                                                                                                                                                                                                                                                                                                                | New Jersey Department of Health, Public Health and Environmental Laboratories                                                                                  | New Jersey Public Health and Environmental Laboratories                                            | Lindsey Bodnar, Shiv K. Verma, Dana Woell, Byeong Jeong                                                                                                                                                                                                                                                                                                                                                                                                                                                                                                                                                                                                                                                                                                                                                                                                                                                 |
| EPI_ISL_1191460                                                                                                                                                                                                                                                                                                                                                                                                                                                                                                                                                                                                                                                                                                                                                                                                                                                                                                                                                                                                                                                                                                                                                                                                                                                                                                                                                                                                                                                                                                                                                                                                                                                                                                                                                                                                                                                                                                                                                                                                                                                                                                                                                                                                                                                                                                                                                                                                                                                                                                                                                                                                                                                                                                                                                                                                                                                                                                                                                                                                                                                                                                                                                                                                                                                                                                                                                                                                                                   | National Virus Reference Laboratory                                                                                                                            | National Virus Reference Laboratory                                                                | Zoe Yandle, Charlene Bennet, Gabriel Gonzalez, Michael Carr, Jonathan Dean, Cillian F De Gascun                                                                                                                                                                                                                                                                                                                                                                                                                                                                                                                                                                                                                                                                                                                                                                                                         |
| EPI_ISL_1195753, EPI_ISL_1195759, EPI_ISL_1195761, EPI_ISL_1195763, EPI_ISL_1195775, EPI_ISL_1195776, EPI_ISL_1195780, EPI_ISL_1195789, EPI_ISL_1195806, EPI_ISL_1195810, EPI_ISL_1195827, EPI_ISL_1195830, EPI_ISL_1195833, EPI_ISL_1195843, EPI_ISL_1195857, EPI_ISL_1195866, EPI_ISL_1195879, EPI_ISL_1195901                                                                                                                                                                                                                                                                                                                                                                                                                                                                                                                                                                                                                                                                                                                                                                                                                                                                                                                                                                                                                                                                                                                                                                                                                                                                                                                                                                                                                                                                                                                                                                                                                                                                                                                                                                                                                                                                                                                                                                                                                                                                                                                                                                                                                                                                                                                                                                                                                                                                                                                                                                                                                                                                                                                                                                                                                                                                                                                                                                                                                                                                                                                                  | NYU Langone Health                                                                                                                                             | Departments of Pathology and Medicine, New York University School of Medicine                      | Adriana Heguy, Dacia Dimartino, Emily Guzman, Christian Marier, Peter Meyn, Sitharam Ramaswami, Gael Westby, Paul Zappile, Yutong Zhang, Paolo Cotzia, Guqing Wang                                                                                                                                                                                                                                                                                                                                                                                                                                                                                                                                                                                                                                                                                                                                      |
| EPI_ISL_1197134, EPI_ISL_1197141, EPI_ISL_1197147                                                                                                                                                                                                                                                                                                                                                                                                                                                                                                                                                                                                                                                                                                                                                                                                                                                                                                                                                                                                                                                                                                                                                                                                                                                                                                                                                                                                                                                                                                                                                                                                                                                                                                                                                                                                                                                                                                                                                                                                                                                                                                                                                                                                                                                                                                                                                                                                                                                                                                                                                                                                                                                                                                                                                                                                                                                                                                                                                                                                                                                                                                                                                                                                                                                                                                                                                                                                 | USC Clinical Lab                                                                                                                                               | Los Angeles County PHL                                                                             | P. Hemarajata et al.                                                                                                                                                                                                                                                                                                                                                                                                                                                                                                                                                                                                                                                                                                                                                                                                                                                                                    |
| EPI_ISL_1197979                                                                                                                                                                                                                                                                                                                                                                                                                                                                                                                                                                                                                                                                                                                                                                                                                                                                                                                                                                                                                                                                                                                                                                                                                                                                                                                                                                                                                                                                                                                                                                                                                                                                                                                                                                                                                                                                                                                                                                                                                                                                                                                                                                                                                                                                                                                                                                                                                                                                                                                                                                                                                                                                                                                                                                                                                                                                                                                                                                                                                                                                                                                                                                                                                                                                                                                                                                                                                                   | New Mexico Department of Health Scientific Laboratory                                                                                                          | Center for Global Health, University of New Mexico Health Sciences Center                          | Daryl Domman, Kurt Schwalm, Twila Kunde, Joseph Hicks, Anastacia Grego, Michael Edwards, Darrell Dinwiddie                                                                                                                                                                                                                                                                                                                                                                                                                                                                                                                                                                                                                                                                                                                                                                                              |
| EPI_ISL_1200535, EPI_ISL_1200563                                                                                                                                                                                                                                                                                                                                                                                                                                                                                                                                                                                                                                                                                                                                                                                                                                                                                                                                                                                                                                                                                                                                                                                                                                                                                                                                                                                                                                                                                                                                                                                                                                                                                                                                                                                                                                                                                                                                                                                                                                                                                                                                                                                                                                                                                                                                                                                                                                                                                                                                                                                                                                                                                                                                                                                                                                                                                                                                                                                                                                                                                                                                                                                                                                                                                                                                                                                                                  | DOHMH Jamaica                                                                                                                                                  | New York City Public Health Laboratory                                                             | Jade Wang, et al.                                                                                                                                                                                                                                                                                                                                                                                                                                                                                                                                                                                                                                                                                                                                                                                                                                                                                       |
| EPI_ISL_1200564                                                                                                                                                                                                                                                                                                                                                                                                                                                                                                                                                                                                                                                                                                                                                                                                                                                                                                                                                                                                                                                                                                                                                                                                                                                                                                                                                                                                                                                                                                                                                                                                                                                                                                                                                                                                                                                                                                                                                                                                                                                                                                                                                                                                                                                                                                                                                                                                                                                                                                                                                                                                                                                                                                                                                                                                                                                                                                                                                                                                                                                                                                                                                                                                                                                                                                                                                                                                                                   | DOHMH Chelsea                                                                                                                                                  | New York City Public Health Laboratory                                                             | Jade Wang, et al.                                                                                                                                                                                                                                                                                                                                                                                                                                                                                                                                                                                                                                                                                                                                                                                                                                                                                       |
| EPI_ISL_1200567, EPI_ISL_1200578, EPI_ISL_1200580                                                                                                                                                                                                                                                                                                                                                                                                                                                                                                                                                                                                                                                                                                                                                                                                                                                                                                                                                                                                                                                                                                                                                                                                                                                                                                                                                                                                                                                                                                                                                                                                                                                                                                                                                                                                                                                                                                                                                                                                                                                                                                                                                                                                                                                                                                                                                                                                                                                                                                                                                                                                                                                                                                                                                                                                                                                                                                                                                                                                                                                                                                                                                                                                                                                                                                                                                                                                 | DOHMH Morrisania                                                                                                                                               | New York City Public Health Laboratory                                                             | Jade Wang, et al.                                                                                                                                                                                                                                                                                                                                                                                                                                                                                                                                                                                                                                                                                                                                                                                                                                                                                       |
| EPI_ISL_1200590                                                                                                                                                                                                                                                                                                                                                                                                                                                                                                                                                                                                                                                                                                                                                                                                                                                                                                                                                                                                                                                                                                                                                                                                                                                                                                                                                                                                                                                                                                                                                                                                                                                                                                                                                                                                                                                                                                                                                                                                                                                                                                                                                                                                                                                                                                                                                                                                                                                                                                                                                                                                                                                                                                                                                                                                                                                                                                                                                                                                                                                                                                                                                                                                                                                                                                                                                                                                                                   | DOHMH Jamaica                                                                                                                                                  | New York City Public Health Laboratory                                                             | Jade Wang, et al.                                                                                                                                                                                                                                                                                                                                                                                                                                                                                                                                                                                                                                                                                                                                                                                                                                                                                       |
| EPI_ISL_1200604                                                                                                                                                                                                                                                                                                                                                                                                                                                                                                                                                                                                                                                                                                                                                                                                                                                                                                                                                                                                                                                                                                                                                                                                                                                                                                                                                                                                                                                                                                                                                                                                                                                                                                                                                                                                                                                                                                                                                                                                                                                                                                                                                                                                                                                                                                                                                                                                                                                                                                                                                                                                                                                                                                                                                                                                                                                                                                                                                                                                                                                                                                                                                                                                                                                                                                                                                                                                                                   | DOHMH Morrisania                                                                                                                                               | New York City Public Health Laboratory                                                             | Jade Wang, et al.                                                                                                                                                                                                                                                                                                                                                                                                                                                                                                                                                                                                                                                                                                                                                                                                                                                                                       |
| EPI_ISL_1200605                                                                                                                                                                                                                                                                                                                                                                                                                                                                                                                                                                                                                                                                                                                                                                                                                                                                                                                                                                                                                                                                                                                                                                                                                                                                                                                                                                                                                                                                                                                                                                                                                                                                                                                                                                                                                                                                                                                                                                                                                                                                                                                                                                                                                                                                                                                                                                                                                                                                                                                                                                                                                                                                                                                                                                                                                                                                                                                                                                                                                                                                                                                                                                                                                                                                                                                                                                                                                                   | DOHMH Crown Heights                                                                                                                                            | New York City Public Health Laboratory                                                             | Jade Wang, et al.                                                                                                                                                                                                                                                                                                                                                                                                                                                                                                                                                                                                                                                                                                                                                                                                                                                                                       |
| EPI_ISL_1200606                                                                                                                                                                                                                                                                                                                                                                                                                                                                                                                                                                                                                                                                                                                                                                                                                                                                                                                                                                                                                                                                                                                                                                                                                                                                                                                                                                                                                                                                                                                                                                                                                                                                                                                                                                                                                                                                                                                                                                                                                                                                                                                                                                                                                                                                                                                                                                                                                                                                                                                                                                                                                                                                                                                                                                                                                                                                                                                                                                                                                                                                                                                                                                                                                                                                                                                                                                                                                                   | DOHMH Riverside                                                                                                                                                | New York City Public Health Laboratory                                                             | Jade Wang, et al.                                                                                                                                                                                                                                                                                                                                                                                                                                                                                                                                                                                                                                                                                                                                                                                                                                                                                       |
| EPI_ISL_1200610                                                                                                                                                                                                                                                                                                                                                                                                                                                                                                                                                                                                                                                                                                                                                                                                                                                                                                                                                                                                                                                                                                                                                                                                                                                                                                                                                                                                                                                                                                                                                                                                                                                                                                                                                                                                                                                                                                                                                                                                                                                                                                                                                                                                                                                                                                                                                                                                                                                                                                                                                                                                                                                                                                                                                                                                                                                                                                                                                                                                                                                                                                                                                                                                                                                                                                                                                                                                                                   | OCME Office Of Chief Medical Examiner                                                                                                                          | New York City Public Health Laboratory                                                             | Jade Wang, et al.                                                                                                                                                                                                                                                                                                                                                                                                                                                                                                                                                                                                                                                                                                                                                                                                                                                                                       |
| EPI_ISL_1203819, EPI_ISL_1203826, EPI_ISL_1203827, EPI_ISL_1203828                                                                                                                                                                                                                                                                                                                                                                                                                                                                                                                                                                                                                                                                                                                                                                                                                                                                                                                                                                                                                                                                                                                                                                                                                                                                                                                                                                                                                                                                                                                                                                                                                                                                                                                                                                                                                                                                                                                                                                                                                                                                                                                                                                                                                                                                                                                                                                                                                                                                                                                                                                                                                                                                                                                                                                                                                                                                                                                                                                                                                                                                                                                                                                                                                                                                                                                                                                                | The Jackson Laboratory                                                                                                                                         | The Jackson Laboratory                                                                             | Lloyd M, Sanderson B, Srivastava A, Maurya R, Renzette N, Omerza G, Kelly K, Li L, Wei C L, Adams M                                                                                                                                                                                                                                                                                                                                                                                                                                                                                                                                                                                                                                                                                                                                                                                                     |
| EPI_ISL_1205453                                                                                                                                                                                                                                                                                                                                                                                                                                                                                                                                                                                                                                                                                                                                                                                                                                                                                                                                                                                                                                                                                                                                                                                                                                                                                                                                                                                                                                                                                                                                                                                                                                                                                                                                                                                                                                                                                                                                                                                                                                                                                                                                                                                                                                                                                                                                                                                                                                                                                                                                                                                                                                                                                                                                                                                                                                                                                                                                                                                                                                                                                                                                                                                                                                                                                                                                                                                                                                   | Mayo Clinic & Mayo Clinic Laboratories                                                                                                                         | Minnesota Department of Health, Public Health Laboratory                                           | Alexandra Lorentz, Jacob Garfin, Matt Plumb, and Xiong Wang                                                                                                                                                                                                                                                                                                                                                                                                                                                                                                                                                                                                                                                                                                                                                                                                                                             |
| EPI_ISL_1218888                                                                                                                                                                                                                                                                                                                                                                                                                                                                                                                                                                                                                                                                                                                                                                                                                                                                                                                                                                                                                                                                                                                                                                                                                                                                                                                                                                                                                                                                                                                                                                                                                                                                                                                                                                                                                                                                                                                                                                                                                                                                                                                                                                                                                                                                                                                                                                                                                                                                                                                                                                                                                                                                                                                                                                                                                                                                                                                                                                                                                                                                                                                                                                                                                                                                                                                                                                                                                                   | Florida Bureau of Public Health Laboratories                                                                                                                   | Florida Bureau of Public Health Laboratories                                                       | Sarah Schmedes, Jason Blanton                                                                                                                                                                                                                                                                                                                                                                                                                                                                                                                                                                                                                                                                                                                                                                                                                                                                           |
| EPI_ISL_1221173, EPI_ISL_1221352, EPI_ISL_1221982, EPI_ISL_1222140, EPI_ISL_1222413                                                                                                                                                                                                                                                                                                                                                                                                                                                                                                                                                                                                                                                                                                                                                                                                                                                                                                                                                                                                                                                                                                                                                                                                                                                                                                                                                                                                                                                                                                                                                                                                                                                                                                                                                                                                                                                                                                                                                                                                                                                                                                                                                                                                                                                                                                                                                                                                                                                                                                                                                                                                                                                                                                                                                                                                                                                                                                                                                                                                                                                                                                                                                                                                                                                                                                                                                               | Laboratory Corporation of America                                                                                                                              | Centers for Disease Control and Prevention Division of Viral Diseases, Pathogen Discovery          | Peter W. Cook, Dakota Howard, Dhvani Batra, Ben L. Rambo-Martin, Minoo Agarwal, Eyad Almasri, Debbie Boles, Ayla Burns, Nuthawin Charoensri, Oren Cohen, Susan Countryman, Mary Ann Cristobal, Bobbi Croy, Suzanne Dale, Hrushikesh Deshmukh, Amanda Douglas, Vincent Drouillon, Marcia Eisenberg, Howard Engler, Rama Ghatti, Prashant Gupta, Susan Hicks, Jake Humphrey, Lax Iyer, Manoj Jain, Mohan Kolli, Brian Krueger, Tim Kuphal, Stanley Letovsky, Michael Levandoski, Craig Lukasik, Jonathan Meltzer, Brian Norvell, Mindy Nye, Scott Parker, Christos Petropoulos, John Pruitt, Steven Ragan, Scott Ryan, Mike Sapeta, Jana Schroth, Suresh Babu Selvaraju, Goran Stevovic, Amanda Suchanek, Andrea Throop, Lyndon Tilson, Thomas Urban, Joe Voshell, Kimberly Wagner, Jonathan Williams, Mary Williamson, Qian Zeng, Tricia Zwiefelhofer, Clinton R. Paden, Suxiang Tong, Duncan MacCannell |



|                                                                                                                                                                                                                                                                                                  |                                                                            |                                                                            |                                                                                                                                                                                                                                                                                           |  |
|--------------------------------------------------------------------------------------------------------------------------------------------------------------------------------------------------------------------------------------------------------------------------------------------------|----------------------------------------------------------------------------|----------------------------------------------------------------------------|-------------------------------------------------------------------------------------------------------------------------------------------------------------------------------------------------------------------------------------------------------------------------------------------|--|
| EPI_ISL_1227035, EPI_ISL_1227037, EPI_ISL_1227039, EPI_ISL_1227044, EPI_ISL_1227048, EPI_ISL_1227049, EPI_ISL_1227050, EPI_ISL_1227051, EPI_ISL_1227053, EPI_ISL_1227056, EPI_ISL_1227057, EPI_ISL_1227059, EPI_ISL_1227060, EPI_ISL_1227061, EPI_ISL_1227062                                    | Erica Lasek-Nesselquist                                                    |                                                                            |                                                                                                                                                                                                                                                                                           |  |
| see above                                                                                                                                                                                                                                                                                        | MONTEFIORE MEDICAL CENTER LABORATORIES                                     | Wadsworth Center, New York State Department of Health                      | Kirsten St. George, Daryl M. Lamson, Alexis Russel, Matthew Shudt, Melissa A Leisner, Jonathan Plitnick, Navjot Singh, John Kelly, Erasmus Schneider, Erica Lasek-Nesselquist                                                                                                             |  |
| EPI_ISL_1227068                                                                                                                                                                                                                                                                                  | Columbia University Irving Medical Center                                  | Wadsworth Center, New York State Department of Health                      | Kirsten St. George, Daryl M. Lamson, Alexis Russel, Matthew Shudt, Melissa A Leisner, Jonathan Plitnick, Navjot Singh, John Kelly, Erasmus Schneider, Erica Lasek-Nesselquist                                                                                                             |  |
| EPI_ISL_1227070, EPI_ISL_1227071, EPI_ISL_1227073, EPI_ISL_1227075, EPI_ISL_1227083, EPI_ISL_1227084                                                                                                                                                                                             | MONTEFIORE MEDICAL CENTER LABORATORIES                                     | Wadsworth Center, New York State Department of Health                      | Kirsten St. George, Daryl M. Lamson, Alexis Russel, Matthew Shudt, Melissa A Leisner, Jonathan Plitnick, Navjot Singh, John Kelly, Erasmus Schneider, Erica Lasek-Nesselquist                                                                                                             |  |
| EPI_ISL_1227087                                                                                                                                                                                                                                                                                  | NYC Pandemic Response Lab                                                  | Wadsworth Center, New York State Department of Health                      | Kirsten St. George, Daryl M. Lamson, Alexis Russel, Matthew Shudt, Melissa A Leisner, Jonathan Plitnick, Navjot Singh, John Kelly, Erasmus Schneider, Erica Lasek-Nesselquist                                                                                                             |  |
| EPI_ISL_1227090, EPI_ISL_1227093, EPI_ISL_1227094, EPI_ISL_1227097, EPI_ISL_1227098, EPI_ISL_1227099, EPI_ISL_1227103, EPI_ISL_1227104, EPI_ISL_1227108                                                                                                                                          | MONTEFIORE MEDICAL CENTER LABORATORIES                                     | Wadsworth Center, New York State Department of Health                      | Kirsten St. George, Daryl M. Lamson, Alexis Russel, Matthew Shudt, Melissa A Leisner, Jonathan Plitnick, Navjot Singh, John Kelly, Erasmus Schneider, Erica Lasek-Nesselquist                                                                                                             |  |
| EPI_ISL_1227109                                                                                                                                                                                                                                                                                  | NYC Pandemic Response Lab                                                  | Wadsworth Center, New York State Department of Health                      | Kirsten St. George, Daryl M. Lamson, Alexis Russel, Matthew Shudt, Melissa A Leisner, Jonathan Plitnick, Navjot Singh, John Kelly, Erasmus Schneider, Erica Lasek-Nesselquist                                                                                                             |  |
| EPI_ISL_1227112, EPI_ISL_1227125, EPI_ISL_1227127, EPI_ISL_1227128                                                                                                                                                                                                                               | MONTEFIORE MEDICAL CENTER LABORATORIES                                     | Wadsworth Center, New York State Department of Health                      | Kirsten St. George, Daryl M. Lamson, Alexis Russel, Matthew Shudt, Melissa A Leisner, Jonathan Plitnick, Navjot Singh, John Kelly, Erasmus Schneider, Erica Lasek-Nesselquist                                                                                                             |  |
| EPI_ISL_1227132                                                                                                                                                                                                                                                                                  | WESTCHESTER MEDICAL CENTER                                                 | Wadsworth Center, New York State Department of Health                      | Kirsten St. George, Daryl M. Lamson, Alexis Russel, Matthew Shudt, Melissa A Leisner, Jonathan Plitnick, Navjot Singh, John Kelly, Erasmus Schneider, Erica Lasek-Nesselquist                                                                                                             |  |
| EPI_ISL_1227138, EPI_ISL_1227139, EPI_ISL_1227141, EPI_ISL_1227146, EPI_ISL_1227147, EPI_ISL_1227156, EPI_ISL_1227159, EPI_ISL_1227160                                                                                                                                                           | NYC Pandemic Response Lab                                                  | Wadsworth Center, New York State Department of Health                      | Kirsten St. George, Daryl M. Lamson, Alexis Russel, Matthew Shudt, Melissa A Leisner, Jonathan Plitnick, Navjot Singh, John Kelly, Erasmus Schneider, Erica Lasek-Nesselquist                                                                                                             |  |
| EPI_ISL_1227166                                                                                                                                                                                                                                                                                  | Columbia University Irving Medical Center                                  | Wadsworth Center, New York State Department of Health                      | Kirsten St. George, Daryl M. Lamson, Alexis Russel, Matthew Shudt, Melissa A Leisner, Jonathan Plitnick, Navjot Singh, John Kelly, Erasmus Schneider, Erica Lasek-Nesselquist                                                                                                             |  |
| EPI_ISL_1227167, EPI_ISL_1227170, EPI_ISL_1227171                                                                                                                                                                                                                                                | NYC Pandemic Response Lab                                                  | Wadsworth Center, New York State Department of Health                      | Kirsten St. George, Daryl M. Lamson, Alexis Russel, Matthew Shudt, Melissa A Leisner, Jonathan Plitnick, Navjot Singh, John Kelly, Erasmus Schneider, Erica Lasek-Nesselquist                                                                                                             |  |
| EPI_ISL_1227174                                                                                                                                                                                                                                                                                  | WESTCHESTER MEDICAL CENTER                                                 | Wadsworth Center, New York State Department of Health                      | Kirsten St. George, Daryl M. Lamson, Alexis Russel, Matthew Shudt, Melissa A Leisner, Jonathan Plitnick, Navjot Singh, John Kelly, Erasmus Schneider, Erica Lasek-Nesselquist                                                                                                             |  |
| EPI_ISL_1227180                                                                                                                                                                                                                                                                                  | MEMORIAL SLOAN KETTERING CANCER CENTER                                     | Wadsworth Center, New York State Department of Health                      | Kirsten St. George, Daryl M. Lamson, Alexis Russel, Matthew Shudt, Melissa A Leisner, Jonathan Plitnick, Navjot Singh, John Kelly, Erasmus Schneider, Erica Lasek-Nesselquist                                                                                                             |  |
| EPI_ISL_1227184, EPI_ISL_1227186, EPI_ISL_1227187                                                                                                                                                                                                                                                | NYC Pandemic Response Lab                                                  | Wadsworth Center, New York State Department of Health                      | Kirsten St. George, Daryl M. Lamson, Alexis Russel, Matthew Shudt, Melissa A Leisner, Jonathan Plitnick, Navjot Singh, John Kelly, Erasmus Schneider, Erica Lasek-Nesselquist                                                                                                             |  |
| EPI_ISL_1227189                                                                                                                                                                                                                                                                                  | WESTCHESTER MEDICAL CENTER                                                 | Wadsworth Center, New York State Department of Health                      | Kirsten St. George, Daryl M. Lamson, Alexis Russel, Matthew Shudt, Melissa A Leisner, Jonathan Plitnick, Navjot Singh, John Kelly, Erasmus Schneider, Erica Lasek-Nesselquist                                                                                                             |  |
| EPI_ISL_1227191, EPI_ISL_1227192, EPI_ISL_1227194, EPI_ISL_1227199, EPI_ISL_1227202, EPI_ISL_1227203, EPI_ISL_1227204                                                                                                                                                                            | NYC Pandemic Response Lab                                                  | Wadsworth Center, New York State Department of Health                      | Kirsten St. George, Daryl M. Lamson, Alexis Russel, Matthew Shudt, Melissa A Leisner, Jonathan Plitnick, Navjot Singh, John Kelly, Erasmus Schneider, Erica Lasek-Nesselquist                                                                                                             |  |
| EPI_ISL_1227207                                                                                                                                                                                                                                                                                  | WESTCHESTER MEDICAL CENTER                                                 | Wadsworth Center, New York State Department of Health                      | Kirsten St. George, Daryl M. Lamson, Alexis Russel, Matthew Shudt, Melissa A Leisner, Jonathan Plitnick, Navjot Singh, John Kelly, Erasmus Schneider, Erica Lasek-Nesselquist                                                                                                             |  |
| EPI_ISL_1227209                                                                                                                                                                                                                                                                                  | ALBANY MEDICAL CENTER                                                      | Wadsworth Center, New York State Department of Health                      | Kirsten St. George, Daryl M. Lamson, Alexis Russel, Matthew Shudt, Melissa A Leisner, Jonathan Plitnick, Navjot Singh, John Kelly, Erasmus Schneider, Erica Lasek-Nesselquist                                                                                                             |  |
| EPI_ISL_1227211                                                                                                                                                                                                                                                                                  | MEMORIAL SLOAN KETTERING CANCER CENTER                                     | Wadsworth Center, New York State Department of Health                      | Kirsten St. George, Daryl M. Lamson, Alexis Russel, Matthew Shudt, Melissa A Leisner, Jonathan Plitnick, Navjot Singh, John Kelly, Erasmus Schneider, Erica Lasek-Nesselquist                                                                                                             |  |
| EPI_ISL_1227218, EPI_ISL_1227219                                                                                                                                                                                                                                                                 | WESTCHESTER MEDICAL CENTER                                                 | Wadsworth Center, New York State Department of Health                      | Kirsten St. George, Daryl M. Lamson, Alexis Russel, Matthew Shudt, Melissa A Leisner, Jonathan Plitnick, Navjot Singh, John Kelly, Erasmus Schneider, Erica Lasek-Nesselquist                                                                                                             |  |
| EPI_ISL_1227221                                                                                                                                                                                                                                                                                  | NYC Pandemic Response Lab                                                  | Wadsworth Center, New York State Department of Health                      | Kirsten St. George, Daryl M. Lamson, Alexis Russel, Matthew Shudt, Melissa A Leisner, Jonathan Plitnick, Navjot Singh, John Kelly, Erasmus Schneider, Erica Lasek-Nesselquist                                                                                                             |  |
| EPI_ISL_1227223, EPI_ISL_1227225                                                                                                                                                                                                                                                                 | WESTCHESTER MEDICAL CENTER                                                 | Wadsworth Center, New York State Department of Health                      | Kirsten St. George, Daryl M. Lamson, Alexis Russel, Matthew Shudt, Melissa A Leisner, Jonathan Plitnick, Navjot Singh, John Kelly, Erasmus Schneider, Erica Lasek-Nesselquist                                                                                                             |  |
| EPI_ISL_1231730, EPI_ISL_1231847, EPI_ISL_1231857                                                                                                                                                                                                                                                | Fulgent Genetics                                                           | Fulgent Genetics                                                           | Harry Gao, Mickey Li, John Gao, Joseph Fierro, Benafsh Sapra, Becky Tsai, Yan Meng, Doreen Ng, James Xie                                                                                                                                                                                  |  |
| EPI_ISL_1235195                                                                                                                                                                                                                                                                                  | CA DPH Viral and Rickettsial Disease Laboratory                            | Chan-Zuckerberg Biohub                                                     | CZB Ciliahub Consortium                                                                                                                                                                                                                                                                   |  |
| EPI_ISL_1235709                                                                                                                                                                                                                                                                                  | Houston Methodist Hospital                                                 | Houston Methodist Hospital                                                 | S. Wesley Long, Randall J. Olsen, Paul A. Christensen, Sishir Subedi, Robert Olson, James J. Davis, Matthew Ojeda Saavedra, Prasanti Yerramilili, Layne Pruitt, Kristina Reppond, Madison N. Shyer, Jessica Cambric, Ilya J. Finkelstein, Jimmy Gollihar, and James M. Musser             |  |
| EPI_ISL_1240765, EPI_ISL_1240772                                                                                                                                                                                                                                                                 | University Hospitals Translational Laboratory (UHTL), University Hospitals | University Hospitals Translational Laboratory (UHTL), University Hospitals | Sadri,N., Alouani,D., Song,X.                                                                                                                                                                                                                                                             |  |
| EPI_ISL_1241837                                                                                                                                                                                                                                                                                  | PHV-FSS                                                                    | PHV-FSS                                                                    | Son Nguyen                                                                                                                                                                                                                                                                                |  |
| EPI_ISL_1244858                                                                                                                                                                                                                                                                                  | Lighthouse Lab in Cambridge                                                | Wellcome Sanger Institute for the COVID-19 Genomics UK (COG-UK) Consortium | Rob Howes, The Lighthouse Lab in Cambridge and Alex Alderton, Roberto Amato, Jeffrey Barrett, Sonia Goncalves, Ewan Harrison, David K. Jackson, Ian Johnston, Dominic Kwiatkowski, Cordelia Langford, John Sillitoe on behalf of the Wellcome Sanger Institute COVID-19 Surveillance Team |  |
| EPI_ISL_1253798                                                                                                                                                                                                                                                                                  | Broad Institute Clinical Research Sequencing Platform                      | Infectious Disease Program, Broad Institute of Harvard and MIT             | Lemieux,J.E., Siddle,K.J., Adams,G., Gladden-Young,A., Lagerborg,K., Rudy,M., DeRuff,K., Carter,A., Normandin,E., Bauer,M., Reilly,S., Tomkins-Tinch,C., Loreth,C., Chaluvadi,S., Birren,B.W., Gallagher,G., Smole,S., Park,D.J., MacInnis,B.L., and Sabeti,P.C.                          |  |
| EPI_ISL_1254233, EPI_ISL_1254234, EPI_ISL_1254237, EPI_ISL_1254242, EPI_ISL_1254243, EPI_ISL_1254259, EPI_ISL_1254283, EPI_ISL_1254285, EPI_ISL_1254288, EPI_ISL_1254293                                                                                                                         | NJDOH, Public Health and Environmental Laboratories                        | NJ_PHEL                                                                    | Lindsey Bodnar, Shiv K. Verma, Dana Woell, Byeong Jeong                                                                                                                                                                                                                                   |  |
| EPI_ISL_1258470, EPI_ISL_1258471, EPI_ISL_1258482, EPI_ISL_1258484, EPI_ISL_1258486, EPI_ISL_1258490, EPI_ISL_1258502, EPI_ISL_1258508, EPI_ISL_1258509, EPI_ISL_1258515, EPI_ISL_1258525, EPI_ISL_1258535, EPI_ISL_1258536, EPI_ISL_1258537, EPI_ISL_1258538, EPI_ISL_1258540, EPI_ISL_1258543, |                                                                            |                                                                            |                                                                                                                                                                                                                                                                                           |  |

|                                                                                                                                                                                                                                                                                                                                                                                                                                                                                                                                                                                                                                                                                                                                                                                                                                                                                                                                                                                                                                                                                                                                                                                                                                                                                                                                                                                                                                                                                    |           |                                                                                |                                                                                |                                                                                                                                                                                                                                                                                                                                                                                                                                                                                                                                                                                                                                                                                                                                                               |                                                                             |
|------------------------------------------------------------------------------------------------------------------------------------------------------------------------------------------------------------------------------------------------------------------------------------------------------------------------------------------------------------------------------------------------------------------------------------------------------------------------------------------------------------------------------------------------------------------------------------------------------------------------------------------------------------------------------------------------------------------------------------------------------------------------------------------------------------------------------------------------------------------------------------------------------------------------------------------------------------------------------------------------------------------------------------------------------------------------------------------------------------------------------------------------------------------------------------------------------------------------------------------------------------------------------------------------------------------------------------------------------------------------------------------------------------------------------------------------------------------------------------|-----------|--------------------------------------------------------------------------------|--------------------------------------------------------------------------------|---------------------------------------------------------------------------------------------------------------------------------------------------------------------------------------------------------------------------------------------------------------------------------------------------------------------------------------------------------------------------------------------------------------------------------------------------------------------------------------------------------------------------------------------------------------------------------------------------------------------------------------------------------------------------------------------------------------------------------------------------------------|-----------------------------------------------------------------------------|
| EPI_ISL_1258550, EPI_ISL_1258553, EPI_ISL_1258589, EPI_ISL_1258637, EPI_ISL_1258638, EPI_ISL_1258640, EPI_ISL_1258641, EPI_ISL_1258643, EPI_ISL_1258660, EPI_ISL_1258672, EPI_ISL_1258681, EPI_ISL_1258683, EPI_ISL_1258684, EPI_ISL_1258685, EPI_ISL_1258716, EPI_ISL_1258717, EPI_ISL_1258718, EPI_ISL_1258719, EPI_ISL_1258723, EPI_ISL_1258725, EPI_ISL_1258726, EPI_ISL_1258728, EPI_ISL_1258730, EPI_ISL_1258731, EPI_ISL_1258733, EPI_ISL_1258734, EPI_ISL_1258736, EPI_ISL_1258737, EPI_ISL_1258739, EPI_ISL_1258741, EPI_ISL_1258744, EPI_ISL_1258746, EPI_ISL_1258756, EPI_ISL_1258760, EPI_ISL_1258767, EPI_ISL_1258768, EPI_ISL_1258769, EPI_ISL_1258770, EPI_ISL_1258774, EPI_ISL_1258776, EPI_ISL_1258777, EPI_ISL_1258786, EPI_ISL_1258795, EPI_ISL_1258796, EPI_ISL_1258799, EPI_ISL_1258802, EPI_ISL_1258804, EPI_ISL_1258806, EPI_ISL_1258807, EPI_ISL_1258811, EPI_ISL_1258816, EPI_ISL_1258820, EPI_ISL_1258822, EPI_ISL_1258827, EPI_ISL_1258828, EPI_ISL_1258830, EPI_ISL_1258831, EPI_ISL_1258835, EPI_ISL_1258838, EPI_ISL_1258839, EPI_ISL_1258840, EPI_ISL_1258841, EPI_ISL_1258842, EPI_ISL_1258843, EPI_ISL_1258849, EPI_ISL_1258854, EPI_ISL_1258860, EPI_ISL_1258866, EPI_ISL_1258870, EPI_ISL_1258873, EPI_ISL_1258884, EPI_ISL_1258885, EPI_ISL_1258888, EPI_ISL_1258890, EPI_ISL_1258892, EPI_ISL_1258902, EPI_ISL_1258903, EPI_ISL_1258904, EPI_ISL_1258907, EPI_ISL_1258913, EPI_ISL_1258915, EPI_ISL_1258919, EPI_ISL_1258926, EPI_ISL_1258927 | see above | Pandemic Response Lab - NYC                                                    | Pandemic Response Lab, R&D                                                     | Henry Lee, Michael Hammerling, Melissa Hopkins, Cybill del Castillo, Shinyoung Clair Kang, William Ward, Pradeep Bugga, Haiping Hao, Jon Laurent                                                                                                                                                                                                                                                                                                                                                                                                                                                                                                                                                                                                              |                                                                             |
| EPI_ISL_1261140, EPI_ISL_1261149                                                                                                                                                                                                                                                                                                                                                                                                                                                                                                                                                                                                                                                                                                                                                                                                                                                                                                                                                                                                                                                                                                                                                                                                                                                                                                                                                                                                                                                   |           | Molecular & Genomic Pathology Laboratory, Thomas Jefferson University Hospital | Molecular & Genomic Pathology Laboratory, Thomas Jefferson University Hospital |                                                                                                                                                                                                                                                                                                                                                                                                                                                                                                                                                                                                                                                                                                                                                               | Nitika Badjatia, Run Jin, Zi-xuan Wang                                      |
| EPI_ISL_1261814                                                                                                                                                                                                                                                                                                                                                                                                                                                                                                                                                                                                                                                                                                                                                                                                                                                                                                                                                                                                                                                                                                                                                                                                                                                                                                                                                                                                                                                                    |           | DOHMH Morrisania                                                               | New York City Public Health Laboratory                                         |                                                                                                                                                                                                                                                                                                                                                                                                                                                                                                                                                                                                                                                                                                                                                               | Jade Wang, et al.                                                           |
| EPI_ISL_1261817                                                                                                                                                                                                                                                                                                                                                                                                                                                                                                                                                                                                                                                                                                                                                                                                                                                                                                                                                                                                                                                                                                                                                                                                                                                                                                                                                                                                                                                                    |           | DOHMH Chelsea                                                                  | New York City Public Health Laboratory                                         |                                                                                                                                                                                                                                                                                                                                                                                                                                                                                                                                                                                                                                                                                                                                                               | Jade Wang, et al.                                                           |
| EPI_ISL_1261821                                                                                                                                                                                                                                                                                                                                                                                                                                                                                                                                                                                                                                                                                                                                                                                                                                                                                                                                                                                                                                                                                                                                                                                                                                                                                                                                                                                                                                                                    |           | DOHMH Crown Heights                                                            | New York City Public Health Laboratory                                         |                                                                                                                                                                                                                                                                                                                                                                                                                                                                                                                                                                                                                                                                                                                                                               | Jade Wang, et al.                                                           |
| EPI_ISL_1261822                                                                                                                                                                                                                                                                                                                                                                                                                                                                                                                                                                                                                                                                                                                                                                                                                                                                                                                                                                                                                                                                                                                                                                                                                                                                                                                                                                                                                                                                    |           | DOHMH Jamaica                                                                  | New York City Public Health Laboratory                                         |                                                                                                                                                                                                                                                                                                                                                                                                                                                                                                                                                                                                                                                                                                                                                               | Jade Wang, et al.                                                           |
| EPI_ISL_1261824                                                                                                                                                                                                                                                                                                                                                                                                                                                                                                                                                                                                                                                                                                                                                                                                                                                                                                                                                                                                                                                                                                                                                                                                                                                                                                                                                                                                                                                                    |           | DOHMH Central Harlem                                                           | New York City Public Health Laboratory                                         |                                                                                                                                                                                                                                                                                                                                                                                                                                                                                                                                                                                                                                                                                                                                                               | Jade Wang, et al.                                                           |
| EPI_ISL_1261828, EPI_ISL_1261829                                                                                                                                                                                                                                                                                                                                                                                                                                                                                                                                                                                                                                                                                                                                                                                                                                                                                                                                                                                                                                                                                                                                                                                                                                                                                                                                                                                                                                                   |           | OCME Office Of Chief Medical Examiner                                          | New York City Public Health Laboratory                                         |                                                                                                                                                                                                                                                                                                                                                                                                                                                                                                                                                                                                                                                                                                                                                               | Jade Wang, et al.                                                           |
| EPI_ISL_1261831                                                                                                                                                                                                                                                                                                                                                                                                                                                                                                                                                                                                                                                                                                                                                                                                                                                                                                                                                                                                                                                                                                                                                                                                                                                                                                                                                                                                                                                                    |           | DOHMH Jamaica                                                                  | New York City Public Health Laboratory                                         |                                                                                                                                                                                                                                                                                                                                                                                                                                                                                                                                                                                                                                                                                                                                                               | Jade Wang, et al.                                                           |
| EPI_ISL_1261835, EPI_ISL_1261837                                                                                                                                                                                                                                                                                                                                                                                                                                                                                                                                                                                                                                                                                                                                                                                                                                                                                                                                                                                                                                                                                                                                                                                                                                                                                                                                                                                                                                                   |           | DOHMH Corona                                                                   | New York City Public Health Laboratory                                         |                                                                                                                                                                                                                                                                                                                                                                                                                                                                                                                                                                                                                                                                                                                                                               | Jade Wang, et al.                                                           |
| EPI_ISL_1261838                                                                                                                                                                                                                                                                                                                                                                                                                                                                                                                                                                                                                                                                                                                                                                                                                                                                                                                                                                                                                                                                                                                                                                                                                                                                                                                                                                                                                                                                    |           | DOHMH Morrisania                                                               | New York City Public Health Laboratory                                         |                                                                                                                                                                                                                                                                                                                                                                                                                                                                                                                                                                                                                                                                                                                                                               | Jade Wang, et al.                                                           |
| EPI_ISL_1261840, EPI_ISL_1261841, EPI_ISL_1261842                                                                                                                                                                                                                                                                                                                                                                                                                                                                                                                                                                                                                                                                                                                                                                                                                                                                                                                                                                                                                                                                                                                                                                                                                                                                                                                                                                                                                                  |           | DOHMH Riverside                                                                | New York City Public Health Laboratory                                         |                                                                                                                                                                                                                                                                                                                                                                                                                                                                                                                                                                                                                                                                                                                                                               | Jade Wang, et al.                                                           |
| EPI_ISL_1261843                                                                                                                                                                                                                                                                                                                                                                                                                                                                                                                                                                                                                                                                                                                                                                                                                                                                                                                                                                                                                                                                                                                                                                                                                                                                                                                                                                                                                                                                    |           | DOHMH Central Harlem                                                           | New York City Public Health Laboratory                                         |                                                                                                                                                                                                                                                                                                                                                                                                                                                                                                                                                                                                                                                                                                                                                               | Jade Wang, et al.                                                           |
| EPI_ISL_1261845                                                                                                                                                                                                                                                                                                                                                                                                                                                                                                                                                                                                                                                                                                                                                                                                                                                                                                                                                                                                                                                                                                                                                                                                                                                                                                                                                                                                                                                                    |           | DOHMH Riverside                                                                | New York City Public Health Laboratory                                         |                                                                                                                                                                                                                                                                                                                                                                                                                                                                                                                                                                                                                                                                                                                                                               | Jade Wang, et al.                                                           |
| EPI_ISL_1261848                                                                                                                                                                                                                                                                                                                                                                                                                                                                                                                                                                                                                                                                                                                                                                                                                                                                                                                                                                                                                                                                                                                                                                                                                                                                                                                                                                                                                                                                    |           | DOHMH Morrisania                                                               | New York City Public Health Laboratory                                         |                                                                                                                                                                                                                                                                                                                                                                                                                                                                                                                                                                                                                                                                                                                                                               | Jade Wang, et al.                                                           |
| EPI_ISL_1261852                                                                                                                                                                                                                                                                                                                                                                                                                                                                                                                                                                                                                                                                                                                                                                                                                                                                                                                                                                                                                                                                                                                                                                                                                                                                                                                                                                                                                                                                    |           | DOHMH Chelsea                                                                  | New York City Public Health Laboratory                                         |                                                                                                                                                                                                                                                                                                                                                                                                                                                                                                                                                                                                                                                                                                                                                               | Jade Wang, et al.                                                           |
| EPI_ISL_1261853                                                                                                                                                                                                                                                                                                                                                                                                                                                                                                                                                                                                                                                                                                                                                                                                                                                                                                                                                                                                                                                                                                                                                                                                                                                                                                                                                                                                                                                                    |           | Department of Homeless Services                                                | New York City Public Health Laboratory                                         |                                                                                                                                                                                                                                                                                                                                                                                                                                                                                                                                                                                                                                                                                                                                                               | Jade Wang, et al.                                                           |
| EPI_ISL_1261854                                                                                                                                                                                                                                                                                                                                                                                                                                                                                                                                                                                                                                                                                                                                                                                                                                                                                                                                                                                                                                                                                                                                                                                                                                                                                                                                                                                                                                                                    |           | OCME Office Of Chief Medical Examiner                                          | New York City Public Health Laboratory                                         |                                                                                                                                                                                                                                                                                                                                                                                                                                                                                                                                                                                                                                                                                                                                                               | Jade Wang, et al.                                                           |
| EPI_ISL_1262507, EPI_ISL_1262508, EPI_ISL_1262517, EPI_ISL_1262533, EPI_ISL_1262547, EPI_ISL_1262551, EPI_ISL_1262552, EPI_ISL_1262554, EPI_ISL_1262556, EPI_ISL_1262559, EPI_ISL_1262561, EPI_ISL_1262566, EPI_ISL_1262567, EPI_ISL_1262568                                                                                                                                                                                                                                                                                                                                                                                                                                                                                                                                                                                                                                                                                                                                                                                                                                                                                                                                                                                                                                                                                                                                                                                                                                       | see above | NYU Langone Health                                                             | Departments of Pathology and Medicine, New York University School of Medicine  | Adriana Heguy, Dacia Dimartino, Emily Guzman, Christian Marier, Peter Meyn, Sitharam Ramaswami, Gael Westby, Paul Zappile, Yutong Zhang, Paolo Cotzia, Guiqing Wang                                                                                                                                                                                                                                                                                                                                                                                                                                                                                                                                                                                           | Rebecca Savage                                                              |
| EPI_ISL_1268198                                                                                                                                                                                                                                                                                                                                                                                                                                                                                                                                                                                                                                                                                                                                                                                                                                                                                                                                                                                                                                                                                                                                                                                                                                                                                                                                                                                                                                                                    |           | DPHL                                                                           | Delaware Public Health Lab                                                     |                                                                                                                                                                                                                                                                                                                                                                                                                                                                                                                                                                                                                                                                                                                                                               | Rebecca Savage                                                              |
| EPI_ISL_1273308, EPI_ISL_1273310, EPI_ISL_1273326, EPI_ISL_1273329, EPI_ISL_1273337, EPI_ISL_1273339, EPI_ISL_1273340, EPI_ISL_1273342, EPI_ISL_1273343, EPI_ISL_1273344, EPI_ISL_1273345, EPI_ISL_1273352, EPI_ISL_1273355, EPI_ISL_1273357, EPI_ISL_1273359, EPI_ISL_1273369, EPI_ISL_1273372, EPI_ISL_1273374, EPI_ISL_1273377, EPI_ISL_1273378                                                                                                                                                                                                                                                                                                                                                                                                                                                                                                                                                                                                                                                                                                                                                                                                                                                                                                                                                                                                                                                                                                                                 | see above | The Jackson Laboratory                                                         | The Jackson Laboratory                                                         |                                                                                                                                                                                                                                                                                                                                                                                                                                                                                                                                                                                                                                                                                                                                                               | Bergeron D, Renzette N, Adams M, Omerza G, Kelly K, Li L                    |
| EPI_ISL_1289652                                                                                                                                                                                                                                                                                                                                                                                                                                                                                                                                                                                                                                                                                                                                                                                                                                                                                                                                                                                                                                                                                                                                                                                                                                                                                                                                                                                                                                                                    |           | Michigan Department of Health and Human Services, Bureau of Laboratories       | Michigan Department of Health and Human Services, Bureau of Laboratories       |                                                                                                                                                                                                                                                                                                                                                                                                                                                                                                                                                                                                                                                                                                                                                               | Blankenship HM, Riner D, Soehnlen MK                                        |
| EPI_ISL_1292627                                                                                                                                                                                                                                                                                                                                                                                                                                                                                                                                                                                                                                                                                                                                                                                                                                                                                                                                                                                                                                                                                                                                                                                                                                                                                                                                                                                                                                                                    |           | State Laboratories Division, Hawaii State Department of Health                 | State Laboratories Division, Hawaii State Department of Health                 |                                                                                                                                                                                                                                                                                                                                                                                                                                                                                                                                                                                                                                                                                                                                                               | Pamela O'Brien, Drew Kuwazaki, Ayana Garnet, Razvan Sultana, Edward Desmond |
| EPI_ISL_1292995, EPI_ISL_1292996                                                                                                                                                                                                                                                                                                                                                                                                                                                                                                                                                                                                                                                                                                                                                                                                                                                                                                                                                                                                                                                                                                                                                                                                                                                                                                                                                                                                                                                   |           | Yale Clinical Virology Lab                                                     | Grubaugh Lab - Yale School of Public Health                                    | Joseph Fauver, Mallery Breban, Isabell Ott, Tara Alpert, Mary Petrone, Anderson Brito, Chantal Vogels, Annie Watkins, Chaney Kalinich, Jessica Rothman, Marie L. Landry, Nathan Grubaugh                                                                                                                                                                                                                                                                                                                                                                                                                                                                                                                                                                      |                                                                             |
| EPI_ISL_1293135, EPI_ISL_1293136, EPI_ISL_1293141                                                                                                                                                                                                                                                                                                                                                                                                                                                                                                                                                                                                                                                                                                                                                                                                                                                                                                                                                                                                                                                                                                                                                                                                                                                                                                                                                                                                                                  |           | Murphy Medical Association                                                     | Grubaugh Lab - Yale School of Public Health                                    | Joseph Fauver, Mallery Breban, Isabell Ott, Tara Alpert, Mary Petrone, Anderson Brito, Chantal Vogels, Annie Watkins, Chaney Kalinich, Jessica Rothman, Caleb Neal, Eva Laszlo, Steven Murphy, Nathan Grubaugh                                                                                                                                                                                                                                                                                                                                                                                                                                                                                                                                                |                                                                             |
| EPI_ISL_1293203                                                                                                                                                                                                                                                                                                                                                                                                                                                                                                                                                                                                                                                                                                                                                                                                                                                                                                                                                                                                                                                                                                                                                                                                                                                                                                                                                                                                                                                                    |           | Yale Clinical Virology Lab                                                     | Grubaugh Lab - Yale School of Public Health                                    | Joseph Fauver, Mallery Breban, Isabell Ott, Tara Alpert, Mary Petrone, Anderson Brito, Chantal Vogels, Annie Watkins, Chaney Kalinich, Jessica Rothman, Marie L. Landry, Nathan Grubaugh                                                                                                                                                                                                                                                                                                                                                                                                                                                                                                                                                                      |                                                                             |
| EPI_ISL_1300107                                                                                                                                                                                                                                                                                                                                                                                                                                                                                                                                                                                                                                                                                                                                                                                                                                                                                                                                                                                                                                                                                                                                                                                                                                                                                                                                                                                                                                                                    |           | Colorado Department of Public Health and Environment                           | Colorado Department of Public Health and Environment                           | Laura Bankers, Molly C. Hetherington-Rauth, Diana Ir, Shannon Ely, Shannon R. Matzinger, Sarah Elizabeth Totten, Emily A. Travanty                                                                                                                                                                                                                                                                                                                                                                                                                                                                                                                                                                                                                            |                                                                             |
| EPI_ISL_1300176, EPI_ISL_1300196, EPI_ISL_1300198, EPI_ISL_1300199, EPI_ISL_1300212, EPI_ISL_1300213, EPI_ISL_1300215, EPI_ISL_1300216, EPI_ISL_1300217, EPI_ISL_1300227, EPI_ISL_1300228, EPI_ISL_1300233, EPI_ISL_1300234, EPI_ISL_1300235, EPI_ISL_1300238, EPI_ISL_1300242, EPI_ISL_1300243, EPI_ISL_1300253, EPI_ISL_1300261, EPI_ISL_1300264, EPI_ISL_1300265, EPI_ISL_1300267, EPI_ISL_1300275                                                                                                                                                                                                                                                                                                                                                                                                                                                                                                                                                                                                                                                                                                                                                                                                                                                                                                                                                                                                                                                                              | see above | NYU Langone Health                                                             | Departments of Pathology and Medicine, New York University School of Medicine  | Adriana Heguy, Dacia Dimartino, Emily Guzman, Christian Marier, Peter Meyn, Sitharam Ramaswami, Gael Westby, Paul Zappile, Yutong Zhang, Paolo Cotzia, Guiqing Wang                                                                                                                                                                                                                                                                                                                                                                                                                                                                                                                                                                                           |                                                                             |
| EPI_ISL_1300757, EPI_ISL_1300758, EPI_ISL_1300818, EPI_ISL_1300820, EPI_ISL_1300843, EPI_ISL_1300875, EPI_ISL_1300877, EPI_ISL_1300879, EPI_ISL_1300883, EPI_ISL_1300899, EPI_ISL_1300903, EPI_ISL_1300906, EPI_ISL_1300917, EPI_ISL_1300920, EPI_ISL_1300925, EPI_ISL_1300926, EPI_ISL_1300928                                                                                                                                                                                                                                                                                                                                                                                                                                                                                                                                                                                                                                                                                                                                                                                                                                                                                                                                                                                                                                                                                                                                                                                    | see above | MSHS Clinical Microbiology Laboratories                                        | MSHS Pathogen Surveillance Program                                             | Ana S. Gonzalez-Reiche, Hala Alshammry, Mitchell J. Sullivan, Brianne Ciferri, Ajay Obla, Angela Amoako, Mahmoud Awawda, Daniel Floda, Julia Matthews, Ashley Salimbangon, Levy Sorninsky, Katherine Beach, Kayla Russo, Charles Gleason, Shelcie Fabre, Giulio Kleiner, Zenab Khan, Bremy Albuquerque, Adriana van de Guchte, Komal Srivastava, Matthew M. Hernandez, Jayeeta Dutta, Denise Jurczynszak, Nancy Francoeur, Betsaida Salom Melo, Irina Oussenko, Gintaras Deikus, Juan Soto, Shwetha Hara Sridhar, Ying-Chih Wang, Kathryn Twyman, Deena R. Altman, Robert Sebra, Adolfo Garcia-Sastre, Marta Luksza, Gopi Patel, Sarah Schaefer, Melissa Gitman, Michael D. Nowak, Alberto Paniz-Mondolfi, Emilia Mia Sordillo, Viviana Simon, Harm van Bakel |                                                                             |
| EPI_ISL_1302760                                                                                                                                                                                                                                                                                                                                                                                                                                                                                                                                                                                                                                                                                                                                                                                                                                                                                                                                                                                                                                                                                                                                                                                                                                                                                                                                                                                                                                                                    |           | Ministry of Health Turkey                                                      | Ministry of Health Turkey                                                      |                                                                                                                                                                                                                                                                                                                                                                                                                                                                                                                                                                                                                                                                                                                                                               | Fatma Bayraktar, Yasemin Cosgun, Suleyman Yalcin, Gulay Korukluoglu         |
| EPI_ISL_1303415, EPI_ISL_1303443, EPI_ISL_1303462                                                                                                                                                                                                                                                                                                                                                                                                                                                                                                                                                                                                                                                                                                                                                                                                                                                                                                                                                                                                                                                                                                                                                                                                                                                                                                                                                                                                                                  |           | USC Clinical Lab                                                               | Los Angeles County PHL                                                         |                                                                                                                                                                                                                                                                                                                                                                                                                                                                                                                                                                                                                                                                                                                                                               | P. Hemarajata et al.                                                        |
| EPI_ISL_1303484                                                                                                                                                                                                                                                                                                                                                                                                                                                                                                                                                                                                                                                                                                                                                                                                                                                                                                                                                                                                                                                                                                                                                                                                                                                                                                                                                                                                                                                                    |           | Flow Diagnostics Lab                                                           | Los Angeles County PHL                                                         |                                                                                                                                                                                                                                                                                                                                                                                                                                                                                                                                                                                                                                                                                                                                                               | P. Hemarajata et al.                                                        |
| EPI_ISL_1303493                                                                                                                                                                                                                                                                                                                                                                                                                                                                                                                                                                                                                                                                                                                                                                                                                                                                                                                                                                                                                                                                                                                                                                                                                                                                                                                                                                                                                                                                    |           | USC Clinical Lab                                                               | Los Angeles County PHL                                                         |                                                                                                                                                                                                                                                                                                                                                                                                                                                                                                                                                                                                                                                                                                                                                               | P. Hemarajata et al.                                                        |
| EPI_ISL_1305151                                                                                                                                                                                                                                                                                                                                                                                                                                                                                                                                                                                                                                                                                                                                                                                                                                                                                                                                                                                                                                                                                                                                                                                                                                                                                                                                                                                                                                                                    |           | Houston Methodist Hospital                                                     | Houston Methodist Hospital                                                     | S. Wesley Long, Randall J. Olsen, Paul A. Christensen, Sishir Subedi, Robert Olson, James J. Davis, Matthew Ojeda Saavedra, Prasanti Yerramilli, Layne Pruitt, Kristina Reppond, Madison N. Shyer, Jessica Cambric, Ilya J. Finkelstein, Jimmy Gollihar, and James M. Musser                                                                                                                                                                                                                                                                                                                                                                                                                                                                                  |                                                                             |
| EPI_ISL_1306254, EPI_ISL_1306256, EPI_ISL_1306274, EPI_ISL_1306283, EPI_ISL_1306286, EPI_ISL_1306296, EPI_ISL_1306299, EPI_ISL_1306307, EPI_ISL_1306312, EPI_ISL_1306315, EPI_ISL_1306316, EPI_ISL_1306331, EPI_ISL_1306332, EPI_ISL_1306333, EPI_ISL_1306335, EPI_ISL_1306347, EPI_ISL_1306353, EPI_ISL_1306364, EPI_ISL_1306373, EPI_ISL_1306379, EPI_ISL_1306381, EPI_ISL_1306382, EPI_ISL_1306388, EPI_ISL_1306391, EPI_ISL_1306394, EPI_ISL_1306395, EPI_ISL_1306398, EPI_ISL_1306412, EPI_ISL_1306422, EPI_ISL_1306426, EPI_ISL_1306429, EPI_ISL_1306436, EPI_ISL_1306438, EPI_ISL_1306440, EPI_ISL_1306453, EPI_ISL_1306457, EPI_ISL_1306458, EPI_ISL_1306471, EPI_ISL_1306474, EPI_ISL_1306477, EPI_ISL_1306478, EPI_ISL_1306485, EPI_ISL_1306492, EPI_ISL_1306493, EPI_ISL_1306508, EPI_ISL_1306513, EPI_ISL_1306518, EPI_ISL_1306528, EPI_ISL_1306539, EPI_ISL_1306545, EPI_ISL_1306546, EPI_ISL_1306549, EPI_ISL_1306550, EPI_ISL_1306553, EPI_ISL_1306558, EPI_ISL_1306568, EPI_ISL_1306575, EPI_ISL_1306587, EPI_ISL_1306590, EPI_ISL_1306607, EPI_ISL_1306616, EPI_ISL_1306626, EPI_ISL_1306627, EPI_ISL_1306628, EPI_ISL_1306634, EPI_ISL_1306640, EPI_ISL_1306644, EPI_ISL_1306648, EPI_ISL_1306661, EPI_ISL_1306662, EPI_ISL_1306667, EPI_ISL_1306679, EPI_ISL_1306680, EPI_ISL_1306695, EPI_ISL_1306698, EPI_ISL_1306701, EPI_ISL_1306703, EPI_ISL_1306705, EPI_ISL_1306712, EPI_ISL_1306724, EPI_ISL_1306735, EPI_ISL_1306746,                                  |           |                                                                                |                                                                                |                                                                                                                                                                                                                                                                                                                                                                                                                                                                                                                                                                                                                                                                                                                                                               |                                                                             |

EPI\_ISL\_1306769, EPI\_ISL\_1306778, EPI\_ISL\_1306782, EPI\_ISL\_1306785, EPI\_ISL\_1306792, EPI\_ISL\_1306802, EPI\_ISL\_1306818, EPI\_ISL\_1306832, EPI\_ISL\_1306839, EPI\_ISL\_1306840, EPI\_ISL\_1306846, EPI\_ISL\_1306854, EPI\_ISL\_1306858, EPI\_ISL\_1306863, EPI\_ISL\_1306866, EPI\_ISL\_1306870, EPI\_ISL\_1306874, EPI\_ISL\_1306879, EPI\_ISL\_1306880, EPI\_ISL\_1306884, EPI\_ISL\_1306895, EPI\_ISL\_1306898, EPI\_ISL\_1306899, EPI\_ISL\_1306913, EPI\_ISL\_1306924, EPI\_ISL\_1306926, EPI\_ISL\_1306936, EPI\_ISL\_1306944, EPI\_ISL\_1306948, EPI\_ISL\_1306952, EPI\_ISL\_1306971, EPI\_ISL\_1306972, EPI\_ISL\_1306979, EPI\_ISL\_1306985, EPI\_ISL\_1306987, EPI\_ISL\_1306988, EPI\_ISL\_1306992, EPI\_ISL\_1307001, EPI\_ISL\_1307003, EPI\_ISL\_1307004, EPI\_ISL\_1307006, EPI\_ISL\_1307008, EPI\_ISL\_1307010, EPI\_ISL\_1307014, EPI\_ISL\_1307022, EPI\_ISL\_1307023, EPI\_ISL\_1307024, EPI\_ISL\_1307025, EPI\_ISL\_1307027, EPI\_ISL\_1307033, EPI\_ISL\_1307035, EPI\_ISL\_1307038, EPI\_ISL\_1307039, EPI\_ISL\_1307053, EPI\_ISL\_1307060, EPI\_ISL\_1307062, EPI\_ISL\_1307064, EPI\_ISL\_1307077, EPI\_ISL\_1307081, EPI\_ISL\_1307085, EPI\_ISL\_1307086, EPI\_ISL\_1307087, EPI\_ISL\_1307088, EPI\_ISL\_1307090, EPI\_ISL\_1307095, EPI\_ISL\_1307097, EPI\_ISL\_1307099, EPI\_ISL\_1307102, EPI\_ISL\_1307103, EPI\_ISL\_1307104, EPI\_ISL\_1307109, EPI\_ISL\_1307111, EPI\_ISL\_1307115, EPI\_ISL\_1307116, EPI\_ISL\_1307117, EPI\_ISL\_1307120, EPI\_ISL\_1307122, EPI\_ISL\_1307124, EPI\_ISL\_1307125, EPI\_ISL\_1307130, EPI\_ISL\_1307131, EPI\_ISL\_1307133, EPI\_ISL\_1307136, EPI\_ISL\_1307146, EPI\_ISL\_1307149, EPI\_ISL\_1307152, EPI\_ISL\_1307154, EPI\_ISL\_1307160, EPI\_ISL\_1307162, EPI\_ISL\_1307171, EPI\_ISL\_1307176, EPI\_ISL\_1307180, EPI\_ISL\_1307181, EPI\_ISL\_1307182, EPI\_ISL\_1307183, EPI\_ISL\_1307185, EPI\_ISL\_1307188, EPI\_ISL\_1307197, EPI\_ISL\_1307204, EPI\_ISL\_1307205, EPI\_ISL\_1307221, EPI\_ISL\_1307234, EPI\_ISL\_1307240, EPI\_ISL\_1307252, EPI\_ISL\_1307258, EPI\_ISL\_1307271, EPI\_ISL\_1307273, EPI\_ISL\_1307274, EPI\_ISL\_1307280, EPI\_ISL\_1307284, EPI\_ISL\_1307289, EPI\_ISL\_1307293, EPI\_ISL\_1307301, EPI\_ISL\_1307310, EPI\_ISL\_1307314, EPI\_ISL\_1307319, EPI\_ISL\_1307320, EPI\_ISL\_1307324, EPI\_ISL\_1307325, EPI\_ISL\_1307326, EPI\_ISL\_1307336, EPI\_ISL\_1307340, EPI\_ISL\_1307342, EPI\_ISL\_1307343, EPI\_ISL\_1307349, EPI\_ISL\_1307361, EPI\_ISL\_1307373, EPI\_ISL\_1307374, EPI\_ISL\_1307380, EPI\_ISL\_1307384, EPI\_ISL\_1307387, EPI\_ISL\_1307388, EPI\_ISL\_1307389, EPI\_ISL\_1307392, EPI\_ISL\_1307399, EPI\_ISL\_1307407, EPI\_ISL\_1307408, EPI\_ISL\_1307409, EPI\_ISL\_1307414, EPI\_ISL\_1307424, EPI\_ISL\_1307425, EPI\_ISL\_1307429, EPI\_ISL\_1307435, EPI\_ISL\_1307453, EPI\_ISL\_1307454, EPI\_ISL\_1307470, EPI\_ISL\_1307474, EPI\_ISL\_1307475, EPI\_ISL\_1307493, EPI\_ISL\_1307495, EPI\_ISL\_1307501, EPI\_ISL\_1307503, EPI\_ISL\_1307505, EPI\_ISL\_1307510, EPI\_ISL\_1307513, EPI\_ISL\_1307515, EPI\_ISL\_1307516, EPI\_ISL\_1307519, EPI\_ISL\_1307524, EPI\_ISL\_1307533, EPI\_ISL\_1307536, EPI\_ISL\_1307541, EPI\_ISL\_1307542, EPI\_ISL\_1307543, EPI\_ISL\_1307544, EPI\_ISL\_1307546, EPI\_ISL\_1307556, EPI\_ISL\_1307557, EPI\_ISL\_1307558, EPI\_ISL\_1307559, EPI\_ISL\_1307561, EPI\_ISL\_1307568, EPI\_ISL\_1307569, EPI\_ISL\_1307578, EPI\_ISL\_1307579, EPI\_ISL\_1307580, EPI\_ISL\_1307587, EPI\_ISL\_1307590, EPI\_ISL\_1307591, EPI\_ISL\_1307593, EPI\_ISL\_1307603, EPI\_ISL\_1307611, EPI\_ISL\_1307615, EPI\_ISL\_1307627, EPI\_ISL\_1307632

|                                                                                                                                                                                                                                                                                                                                                                                                                                                                           |                                                                                |                                                                                           |                                                                                                                                                                                                                                                                                                                                                                                                                                                                                                                                                                                                                                                                                                                                                                                                                                                                                                         |
|---------------------------------------------------------------------------------------------------------------------------------------------------------------------------------------------------------------------------------------------------------------------------------------------------------------------------------------------------------------------------------------------------------------------------------------------------------------------------|--------------------------------------------------------------------------------|-------------------------------------------------------------------------------------------|---------------------------------------------------------------------------------------------------------------------------------------------------------------------------------------------------------------------------------------------------------------------------------------------------------------------------------------------------------------------------------------------------------------------------------------------------------------------------------------------------------------------------------------------------------------------------------------------------------------------------------------------------------------------------------------------------------------------------------------------------------------------------------------------------------------------------------------------------------------------------------------------------------|
| see above                                                                                                                                                                                                                                                                                                                                                                                                                                                                 | Pandemic Response Lab - NYC                                                    | Pandemic Response Lab, R&D                                                                | Henry Lee, Michael Hammerling, Melissa Hopkins, Cybill del Castillo, Shinyoung Clair Kang, William Ward, Pradeep Bugga, Sol Rey, Dylan Law, Haiping Hao, Jon Laurent                                                                                                                                                                                                                                                                                                                                                                                                                                                                                                                                                                                                                                                                                                                                    |
| EPI_ISL_1311965                                                                                                                                                                                                                                                                                                                                                                                                                                                           | The Ohio State University Applied Microbiology Services Laboratory             | The Ohio State University Applied Microbiology Services Laboratory                        | Seth A. Faith PhD                                                                                                                                                                                                                                                                                                                                                                                                                                                                                                                                                                                                                                                                                                                                                                                                                                                                                       |
| EPI_ISL_1312775                                                                                                                                                                                                                                                                                                                                                                                                                                                           | Molecular & Genomic Pathology Laboratory, Thomas Jefferson University Hospital | Molecular & Genomic Pathology Laboratory, Thomas Jefferson University Hospital            | Run Jin, Nitika Badjatia, Zi-xuan Wang                                                                                                                                                                                                                                                                                                                                                                                                                                                                                                                                                                                                                                                                                                                                                                                                                                                                  |
| EPI_ISL_1313545, EPI_ISL_1313547, EPI_ISL_1313549                                                                                                                                                                                                                                                                                                                                                                                                                         | NJDOH, Public Health and Environmental Laboratories                            | NJ_PHEL                                                                                   | Lindsey Bodnar, Shiv K. Verma, Dana Woell, Byeong Jeong                                                                                                                                                                                                                                                                                                                                                                                                                                                                                                                                                                                                                                                                                                                                                                                                                                                 |
| EPI_ISL_1313718                                                                                                                                                                                                                                                                                                                                                                                                                                                           | Utah Public Health Laboratory                                                  | Utah Public Health Laboratory                                                             | Erin L. Young, Kelly F. Oakeson, Tara Gallagher                                                                                                                                                                                                                                                                                                                                                                                                                                                                                                                                                                                                                                                                                                                                                                                                                                                         |
| EPI_ISL_1314086                                                                                                                                                                                                                                                                                                                                                                                                                                                           | University of Wisconsin-Madison AIDS Vaccine Research Laboratories             | University of Wisconsin-Madison AIDS Vaccine Research Laboratories                        | Gage Moreno, Katarina Braun, et al. AIDS Vaccine Research Laboratories                                                                                                                                                                                                                                                                                                                                                                                                                                                                                                                                                                                                                                                                                                                                                                                                                                  |
| EPI_ISL_1314316                                                                                                                                                                                                                                                                                                                                                                                                                                                           | Mayo Clinic & Mayo Clinic Laboratories                                         | Minnesota Department of Health, Public Health Laboratory                                  | Alexandra Lorentz, Jacob Garfin, Matt Plumb, and Xiong Wang                                                                                                                                                                                                                                                                                                                                                                                                                                                                                                                                                                                                                                                                                                                                                                                                                                             |
| EPI_ISL_1315130, EPI_ISL_1315131, EPI_ISL_1315134, EPI_ISL_1315138, EPI_ISL_1315141, EPI_ISL_1315142, EPI_ISL_1315143, EPI_ISL_1315144, EPI_ISL_1315145, EPI_ISL_1315166, EPI_ISL_1315172, EPI_ISL_1315178, EPI_ISL_1315179, EPI_ISL_1315186, EPI_ISL_1315189, EPI_ISL_1315190, EPI_ISL_1315193, EPI_ISL_1315196, EPI_ISL_1315197, EPI_ISL_1315202, EPI_ISL_1315203, EPI_ISL_1315207, EPI_ISL_1315208, EPI_ISL_1315209, EPI_ISL_1315215, EPI_ISL_1315217, EPI_ISL_1315218 | The Jackson Laboratory                                                         | The Jackson Laboratory                                                                    | Bergeron D, Renzette N, Adams M, Omerza G, Kelly K, Li L                                                                                                                                                                                                                                                                                                                                                                                                                                                                                                                                                                                                                                                                                                                                                                                                                                                |
| see above                                                                                                                                                                                                                                                                                                                                                                                                                                                                 | Laboratory Corporation of America                                              | Centers for Disease Control and Prevention Division of Viral Diseases, Pathogen Discovery | Peter W. Cook, Dakota Howard, Dhvani Batra, Ben L. Rambo-Martin, Minoo Agarwal, Eyad Almasri, Debbie Boles, Ayla Burns, Nuthawin Charoensri, Oren Cohen, Susan Countryman, Mary Ann Cristobal, Bobbi Croy, Suzanne Dale, Hrushikesh Deshmukh, Amanda Douglas, Vincent Drouillon, Marcia Eisenberg, Howard Engler, Rama Ghatti, Prashant Gupta, Susan Hicks, Jake Humphrey, Lax Iyer, Manoj Jain, Mohan Kolli, Brian Krueger, Tim Kuphal, Stanley Letovsky, Michael Levandoski, Craig Lukasik, Jonathan Meltzer, Brian Norvell, Mindy Nye, Scott Parker, Christos Petropoulos, John Pruitt, Steven Ragan, Scott Ryan, Mike Sapeta, Jana Schroth, Suresh Babu Selvaraju, Goran Stevovic, Amanda Suchanek, Andrea Throop, Lyndon Tilson, Thomas Urban, Joe Voshell, Kimberly Wagner, Jonathan Williams, Mary Williamson, Qian Zeng, Tricia Zwiefelhofer, Clinton R. Paden, Suxiang Tong, Duncan MacCannell |
| EPI_ISL_1321493                                                                                                                                                                                                                                                                                                                                                                                                                                                           | Genetica Molecular and Subdepartamento de Virologia ISP Chile                  | Instituto de Salud Publica de Chile                                                       | Javier Tognarelli, Karen Orostica, Barbara Parra, Loredana Arata, Jaime Lagos, Gisselle Barra, Patricia Bustos, Rodrigo Fasce, Andres Castillo, Jorge Fernandez                                                                                                                                                                                                                                                                                                                                                                                                                                                                                                                                                                                                                                                                                                                                         |
| EPI_ISL_1322716                                                                                                                                                                                                                                                                                                                                                                                                                                                           | KU Leuven, Rega Institute, Clinical and Epidemiological Virology               | KU Leuven, Rega Institute, Clinical and Epidemiological Virology                          | Tony Wawina-Bokalanga, Bert Vanmechelen, Joan Marti-Carerras, Piet Maes                                                                                                                                                                                                                                                                                                                                                                                                                                                                                                                                                                                                                                                                                                                                                                                                                                 |
| EPI_ISL_1322748, EPI_ISL_1322767, EPI_ISL_1322782, EPI_ISL_1322785, EPI_ISL_1322786, EPI_ISL_1322795, EPI_ISL_1322801, EPI_ISL_1322803, EPI_ISL_1322808, EPI_ISL_1322813, EPI_ISL_1322814, EPI_ISL_1322822, EPI_ISL_1322823, EPI_ISL_1322824, EPI_ISL_1322827, EPI_ISL_1322829                                                                                                                                                                                            | NYU Langone Health                                                             | Departments of Pathology and Medicine, New York University School of Medicine             | Adriana Heguy, Dacia Dimartino, Emily Guzman, Christian Marier, Peter Meyn, Sitharam Ramaswami, Gael Westby, Paul Zappile, Yutong Zhang, Paolo Cotzia, Guiqing Wang                                                                                                                                                                                                                                                                                                                                                                                                                                                                                                                                                                                                                                                                                                                                     |
| see above                                                                                                                                                                                                                                                                                                                                                                                                                                                                 | Lighthouse Lab in Cambridge                                                    | Wellcome Sanger Institute for the COVID-19 Genomics UK (COG-UK) Consortium                | Rob Howes, The Lighthouse Lab in Cambridge and Alex Alderton, Roberto Amato, Jeffrey Barrett, Sonia Goncalves, Ewan Harrison, David K. Jackson, Ian Johnston, Dominic Kwiatkowski, Cordelia Langford, John Sillitoe on behalf of the Wellcome Sanger Institute COVID-19 Surveillance Team                                                                                                                                                                                                                                                                                                                                                                                                                                                                                                                                                                                                               |
| EPI_ISL_1337464                                                                                                                                                                                                                                                                                                                                                                                                                                                           | DOHMH Chelsea                                                                  | New York City Public Health Laboratory                                                    | Jade Wang, et al.                                                                                                                                                                                                                                                                                                                                                                                                                                                                                                                                                                                                                                                                                                                                                                                                                                                                                       |
| EPI_ISL_1337468                                                                                                                                                                                                                                                                                                                                                                                                                                                           | DOHMH Fort Greene                                                              | New York City Public Health Laboratory                                                    | Jade Wang, et al.                                                                                                                                                                                                                                                                                                                                                                                                                                                                                                                                                                                                                                                                                                                                                                                                                                                                                       |
| EPI_ISL_1337475                                                                                                                                                                                                                                                                                                                                                                                                                                                           | DOHMH Corona                                                                   | New York City Public Health Laboratory                                                    | Jade Wang, et al.                                                                                                                                                                                                                                                                                                                                                                                                                                                                                                                                                                                                                                                                                                                                                                                                                                                                                       |
| EPI_ISL_1337482                                                                                                                                                                                                                                                                                                                                                                                                                                                           | OCME Office Of Chief Medical Examiner                                          | New York City Public Health Laboratory                                                    | Jade Wang, et al.                                                                                                                                                                                                                                                                                                                                                                                                                                                                                                                                                                                                                                                                                                                                                                                                                                                                                       |
| EPI_ISL_1337513                                                                                                                                                                                                                                                                                                                                                                                                                                                           | DOHMH Jamaica                                                                  | New York City Public Health Laboratory                                                    | Jade Wang, et al.                                                                                                                                                                                                                                                                                                                                                                                                                                                                                                                                                                                                                                                                                                                                                                                                                                                                                       |
| EPI_ISL_1337514, EPI_ISL_1337515                                                                                                                                                                                                                                                                                                                                                                                                                                          | DOHMH Corona                                                                   | New York City Public Health Laboratory                                                    | Jade Wang, et al.                                                                                                                                                                                                                                                                                                                                                                                                                                                                                                                                                                                                                                                                                                                                                                                                                                                                                       |
| EPI_ISL_1337520                                                                                                                                                                                                                                                                                                                                                                                                                                                           | DOHMH Central Harlem                                                           | New York City Public Health Laboratory                                                    | Jade Wang, et al.                                                                                                                                                                                                                                                                                                                                                                                                                                                                                                                                                                                                                                                                                                                                                                                                                                                                                       |
| EPI_ISL_1337527                                                                                                                                                                                                                                                                                                                                                                                                                                                           | OCME Office Of Chief Medical Examiner                                          | New York City Public Health Laboratory                                                    | Jade Wang, et al.                                                                                                                                                                                                                                                                                                                                                                                                                                                                                                                                                                                                                                                                                                                                                                                                                                                                                       |
| EPI_ISL_1337528                                                                                                                                                                                                                                                                                                                                                                                                                                                           | DOHMH Crown Heights                                                            | New York City Public Health Laboratory                                                    | Jade Wang, et al.                                                                                                                                                                                                                                                                                                                                                                                                                                                                                                                                                                                                                                                                                                                                                                                                                                                                                       |
| EPI_ISL_1337530                                                                                                                                                                                                                                                                                                                                                                                                                                                           | DOHMH PHL                                                                      | New York City Public Health Laboratory                                                    | Jade Wang, et al.                                                                                                                                                                                                                                                                                                                                                                                                                                                                                                                                                                                                                                                                                                                                                                                                                                                                                       |
| EPI_ISL_1337534, EPI_ISL_1337535                                                                                                                                                                                                                                                                                                                                                                                                                                          | DOHMH Crown Heights                                                            | New York City Public Health Laboratory                                                    | Jade Wang, et al.                                                                                                                                                                                                                                                                                                                                                                                                                                                                                                                                                                                                                                                                                                                                                                                                                                                                                       |
| EPI_ISL_1337537, EPI_ISL_1337538                                                                                                                                                                                                                                                                                                                                                                                                                                          | DOHMH Jamaica                                                                  | New York City Public Health Laboratory                                                    | Jade Wang, et al.                                                                                                                                                                                                                                                                                                                                                                                                                                                                                                                                                                                                                                                                                                                                                                                                                                                                                       |
| EPI_ISL_1337540                                                                                                                                                                                                                                                                                                                                                                                                                                                           | DOHMH Morrisania                                                               | New York City Public Health Laboratory                                                    | Jade Wang, et al.                                                                                                                                                                                                                                                                                                                                                                                                                                                                                                                                                                                                                                                                                                                                                                                                                                                                                       |
| EPI_ISL_1338534, EPI_ISL_1338632, EPI_ISL_1338661, EPI_ISL_1338672, EPI_ISL_1338686, EPI_ISL_1338705, EPI_ISL_1338723, EPI_ISL_1339238, EPI_ISL_1339633, EPI_ISL_1339748                                                                                                                                                                                                                                                                                                  | Laboratory Corporation of America                                              | Centers for Disease Control and Prevention Division of Viral Diseases, Pathogen Discovery | Peter W. Cook, Dakota Howard, Dhvani Batra, Ben L. Rambo-Martin, Minoo Agarwal, Eyad Almasri, Debbie Boles, Ayla Burns, Nuthawin Charoensri, Oren Cohen, Susan Countryman, Mary Ann Cristobal, Bobbi Croy, Suzanne Dale, Hrushikesh Deshmukh, Amanda Douglas, Vincent Drouillon, Marcia Eisenberg, Howard Engler, Rama Ghatti, Prashant Gupta, Susan Hicks, Jake Humphrey, Lax Iyer, Manoj Jain, Mohan Kolli, Brian Krueger, Tim Kuphal, Stanley Letovsky, Michael Levandoski, Craig Lukasik, Jonathan Meltzer, Brian Norvell, Mindy Nye, Scott Parker, Christos Petropoulos, John Pruitt, Steven Ragan, Scott Ryan, Mike Sapeta, Jana Schroth, Suresh Babu Selvaraju, Goran Stevovic, Amanda Suchanek, Andrea Throop, Lyndon Tilson, Thomas Urban, Joe Voshell, Kimberly Wagner, Jonathan Williams, Mary Williamson, Qian Zeng, Tricia Zwiefelhofer, Clinton R. Paden, Suxiang Tong, Duncan MacCannell |
| EPI_ISL_1340173, EPI_ISL_1340175, EPI_ISL_1340190, EPI_ISL_1340202, EPI_ISL_1340204, EPI_ISL_1340207                                                                                                                                                                                                                                                                                                                                                                      | NJDOH, Public Health and Environmental Laboratories                            | New Jersey Public Health and Environmental Laboratories (PHEL)                            | Lindsey Bodnar, Shiv K. Verma, Dana Woell, Byeong Jeong                                                                                                                                                                                                                                                                                                                                                                                                                                                                                                                                                                                                                                                                                                                                                                                                                                                 |
| EPI_ISL_1340884                                                                                                                                                                                                                                                                                                                                                                                                                                                           | New Mexico Department of Health Scientific Laboratory                          | New Mexico Department of Health Scientific Laboratory                                     | Ellie Johnson, Anastacia Griego-Fisher, D'eldra Malone, Jennifer Benoit                                                                                                                                                                                                                                                                                                                                                                                                                                                                                                                                                                                                                                                                                                                                                                                                                                 |
| EPI_ISL_1364525                                                                                                                                                                                                                                                                                                                                                                                                                                                           | Stanford Health Care                                                           | Stanford University School of Medicine, Clinical Virology Laboratory                      | Daniel Solis, Mamdouh Sibai, Fumiko Yamamoto, Malaya K. Sahoo, Michelle Verghese, ChunHong Huang, James Zehnder, and Benjamin A. Pinsky                                                                                                                                                                                                                                                                                                                                                                                                                                                                                                                                                                                                                                                                                                                                                                 |
| EPI_ISL_1365482                                                                                                                                                                                                                                                                                                                                                                                                                                                           | Arizona State University                                                       | Arizona State University                                                                  | Peter T. Skidmore, LaRinda A. Holland, Rabia Maqsood, Emily A. Kaelin, Nicholas J. Mellor, Kristina Buss, Joy M. Blain, Neal W Woodbury, Valerie Harris, Joshua LaBaer, Vel Murugan, Eftrem S. Lim                                                                                                                                                                                                                                                                                                                                                                                                                                                                                                                                                                                                                                                                                                      |

|                                                                                                                                                                                                                                                                                                                                                                                                                                                                                                                                                                                                                                                                                                                                                                                                                                                                                                                                                                                                                                                                                                                                                                                                                                                                                                                                                                                                                                                                                                                                                                                                                                                                                                                                                                                                                                                                                                                                                                                                                                                                                                                                                                                                                                                                                                                                                                                                                                                                                                                                                                                                                                                                                                                                                                                                                                                                                                                                                                                                                                                                                                                                                                                                                                                                                          |                                                                          |                                                                              |                                                                                                                                                                                                                                                                                            |
|------------------------------------------------------------------------------------------------------------------------------------------------------------------------------------------------------------------------------------------------------------------------------------------------------------------------------------------------------------------------------------------------------------------------------------------------------------------------------------------------------------------------------------------------------------------------------------------------------------------------------------------------------------------------------------------------------------------------------------------------------------------------------------------------------------------------------------------------------------------------------------------------------------------------------------------------------------------------------------------------------------------------------------------------------------------------------------------------------------------------------------------------------------------------------------------------------------------------------------------------------------------------------------------------------------------------------------------------------------------------------------------------------------------------------------------------------------------------------------------------------------------------------------------------------------------------------------------------------------------------------------------------------------------------------------------------------------------------------------------------------------------------------------------------------------------------------------------------------------------------------------------------------------------------------------------------------------------------------------------------------------------------------------------------------------------------------------------------------------------------------------------------------------------------------------------------------------------------------------------------------------------------------------------------------------------------------------------------------------------------------------------------------------------------------------------------------------------------------------------------------------------------------------------------------------------------------------------------------------------------------------------------------------------------------------------------------------------------------------------------------------------------------------------------------------------------------------------------------------------------------------------------------------------------------------------------------------------------------------------------------------------------------------------------------------------------------------------------------------------------------------------------------------------------------------------------------------------------------------------------------------------------------------------|--------------------------------------------------------------------------|------------------------------------------------------------------------------|--------------------------------------------------------------------------------------------------------------------------------------------------------------------------------------------------------------------------------------------------------------------------------------------|
| EPI_ISL_1365717                                                                                                                                                                                                                                                                                                                                                                                                                                                                                                                                                                                                                                                                                                                                                                                                                                                                                                                                                                                                                                                                                                                                                                                                                                                                                                                                                                                                                                                                                                                                                                                                                                                                                                                                                                                                                                                                                                                                                                                                                                                                                                                                                                                                                                                                                                                                                                                                                                                                                                                                                                                                                                                                                                                                                                                                                                                                                                                                                                                                                                                                                                                                                                                                                                                                          | Virginia Division of Consolidated Laboratory Services                    | Virginia Division of Consolidated Laboratory Services                        | Virginia DCLS                                                                                                                                                                                                                                                                              |
| EPI_ISL_1367826                                                                                                                                                                                                                                                                                                                                                                                                                                                                                                                                                                                                                                                                                                                                                                                                                                                                                                                                                                                                                                                                                                                                                                                                                                                                                                                                                                                                                                                                                                                                                                                                                                                                                                                                                                                                                                                                                                                                                                                                                                                                                                                                                                                                                                                                                                                                                                                                                                                                                                                                                                                                                                                                                                                                                                                                                                                                                                                                                                                                                                                                                                                                                                                                                                                                          | Michigan Department of Health and Human Services, Bureau of Laboratories | Michigan Department of Health and Human Services, Bureau of Laboratories     | Blankenship HM, Riner D, Soehnen MK                                                                                                                                                                                                                                                        |
| EPI_ISL_1369590                                                                                                                                                                                                                                                                                                                                                                                                                                                                                                                                                                                                                                                                                                                                                                                                                                                                                                                                                                                                                                                                                                                                                                                                                                                                                                                                                                                                                                                                                                                                                                                                                                                                                                                                                                                                                                                                                                                                                                                                                                                                                                                                                                                                                                                                                                                                                                                                                                                                                                                                                                                                                                                                                                                                                                                                                                                                                                                                                                                                                                                                                                                                                                                                                                                                          | University Hospitals of Geneva, Laboratory of Virology                   | HUG, Laboratory of Virology and the Health2030 Genome Center                 | Samuel Cordey, Ana Rita Goncalves, Laurent Kaiser, Lorenzo Cerutti, Henri Pegeot, Melyssa Elies, Deborah Penet, Keith Harshman, Ioannis Xenarios, Emmanouil Dermitzakis                                                                                                                    |
| EPI_ISL_1373032                                                                                                                                                                                                                                                                                                                                                                                                                                                                                                                                                                                                                                                                                                                                                                                                                                                                                                                                                                                                                                                                                                                                                                                                                                                                                                                                                                                                                                                                                                                                                                                                                                                                                                                                                                                                                                                                                                                                                                                                                                                                                                                                                                                                                                                                                                                                                                                                                                                                                                                                                                                                                                                                                                                                                                                                                                                                                                                                                                                                                                                                                                                                                                                                                                                                          | Wyoming Public Health Laboratory                                         | Wyoming Public Health Laboratory                                             | Jim Mildenerberger, Wanda Manley, Noah Hull, Taylor Fearing, Lynette Gumbleton, Channing Weber, Ashley Norberg, Chayse Rowley, Marley Goetz, Brian Dominguez, Elliot Thomasson, Cari Sloma, and Rob Christensen                                                                            |
| EPI_ISL_1378711, EPI_ISL_1378720, EPI_ISL_1378724                                                                                                                                                                                                                                                                                                                                                                                                                                                                                                                                                                                                                                                                                                                                                                                                                                                                                                                                                                                                                                                                                                                                                                                                                                                                                                                                                                                                                                                                                                                                                                                                                                                                                                                                                                                                                                                                                                                                                                                                                                                                                                                                                                                                                                                                                                                                                                                                                                                                                                                                                                                                                                                                                                                                                                                                                                                                                                                                                                                                                                                                                                                                                                                                                                        | Yale Clinical Virology Lab                                               | Grubaugh Lab - Yale School of Public Health                                  | Joseph Fauver, Mallery Breban, Isabell Ott, Tara Alpert, Mary Petrone, Anderson Brito, Chantal Vogels, Annie Watkins, Chaney Kalinich, Jessica Rothman, Marie L. Landry, Nathan Grubaugh                                                                                                   |
| EPI_ISL_1378726                                                                                                                                                                                                                                                                                                                                                                                                                                                                                                                                                                                                                                                                                                                                                                                                                                                                                                                                                                                                                                                                                                                                                                                                                                                                                                                                                                                                                                                                                                                                                                                                                                                                                                                                                                                                                                                                                                                                                                                                                                                                                                                                                                                                                                                                                                                                                                                                                                                                                                                                                                                                                                                                                                                                                                                                                                                                                                                                                                                                                                                                                                                                                                                                                                                                          | Grubaugh Lab - Yale School of Public Health                              | Grubaugh Lab - Yale School of Public Health                                  | Joseph Fauver, Mallery Breban, Isabell Ott, Tara Alpert, Mary Petrone, Anderson Brito, Chantal Vogels, Annie Watkins, Chaney Kalinich, Jessica Rothman, Nathan Grubaugh                                                                                                                    |
| EPI_ISL_1378728, EPI_ISL_1378730, EPI_ISL_1378736, EPI_ISL_1378738, EPI_ISL_1378741, EPI_ISL_1378744, EPI_ISL_1378745, EPI_ISL_1378746, EPI_ISL_1378748, EPI_ISL_1378752                                                                                                                                                                                                                                                                                                                                                                                                                                                                                                                                                                                                                                                                                                                                                                                                                                                                                                                                                                                                                                                                                                                                                                                                                                                                                                                                                                                                                                                                                                                                                                                                                                                                                                                                                                                                                                                                                                                                                                                                                                                                                                                                                                                                                                                                                                                                                                                                                                                                                                                                                                                                                                                                                                                                                                                                                                                                                                                                                                                                                                                                                                                 | Yale Clinical Virology Lab                                               | Grubaugh Lab - Yale School of Public Health                                  | Joseph Fauver, Mallery Breban, Isabell Ott, Tara Alpert, Mary Petrone, Anderson Brito, Chantal Vogels, Annie Watkins, Chaney Kalinich, Jessica Rothman, Marie L. Landry, Nathan Grubaugh                                                                                                   |
| EPI_ISL_1378753                                                                                                                                                                                                                                                                                                                                                                                                                                                                                                                                                                                                                                                                                                                                                                                                                                                                                                                                                                                                                                                                                                                                                                                                                                                                                                                                                                                                                                                                                                                                                                                                                                                                                                                                                                                                                                                                                                                                                                                                                                                                                                                                                                                                                                                                                                                                                                                                                                                                                                                                                                                                                                                                                                                                                                                                                                                                                                                                                                                                                                                                                                                                                                                                                                                                          | Grubaugh Lab - Yale School of Public Health                              | Grubaugh Lab - Yale School of Public Health                                  | Joseph Fauver, Mallery Breban, Isabell Ott, Tara Alpert, Mary Petrone, Anderson Brito, Chantal Vogels, Annie Watkins, Chaney Kalinich, Jessica Rothman, Nathan Grubaugh                                                                                                                    |
| EPI_ISL_1378762, EPI_ISL_1378764                                                                                                                                                                                                                                                                                                                                                                                                                                                                                                                                                                                                                                                                                                                                                                                                                                                                                                                                                                                                                                                                                                                                                                                                                                                                                                                                                                                                                                                                                                                                                                                                                                                                                                                                                                                                                                                                                                                                                                                                                                                                                                                                                                                                                                                                                                                                                                                                                                                                                                                                                                                                                                                                                                                                                                                                                                                                                                                                                                                                                                                                                                                                                                                                                                                         | Yale Clinical Virology Lab                                               | Grubaugh Lab - Yale School of Public Health                                  | Joseph Fauver, Mallery Breban, Isabell Ott, Tara Alpert, Mary Petrone, Anderson Brito, Chantal Vogels, Annie Watkins, Chaney Kalinich, Jessica Rothman, Marie L. Landry, Nathan Grubaugh                                                                                                   |
| EPI_ISL_1378768, EPI_ISL_1378790, EPI_ISL_1378799, EPI_ISL_1378809                                                                                                                                                                                                                                                                                                                                                                                                                                                                                                                                                                                                                                                                                                                                                                                                                                                                                                                                                                                                                                                                                                                                                                                                                                                                                                                                                                                                                                                                                                                                                                                                                                                                                                                                                                                                                                                                                                                                                                                                                                                                                                                                                                                                                                                                                                                                                                                                                                                                                                                                                                                                                                                                                                                                                                                                                                                                                                                                                                                                                                                                                                                                                                                                                       | Tempus                                                                   | Grubaugh Lab - Yale School of Public Health                                  | Joseph Fauver, Mallery Breban, Isabell Ott, Tara Alpert, Mary Petrone, Anderson Brito, Chantal Vogels, Annie Watkins, Chaney Kalinich, Jessica Rothman, Matthew J. MacKay, Gaurav Khullar, Jessica Metti, Joel T. Dudley, Megan Nash, Nike Beaubier, Christopher E. Mason, Nathan Grubaugh |
| EPI_ISL_1378825, EPI_ISL_1378826                                                                                                                                                                                                                                                                                                                                                                                                                                                                                                                                                                                                                                                                                                                                                                                                                                                                                                                                                                                                                                                                                                                                                                                                                                                                                                                                                                                                                                                                                                                                                                                                                                                                                                                                                                                                                                                                                                                                                                                                                                                                                                                                                                                                                                                                                                                                                                                                                                                                                                                                                                                                                                                                                                                                                                                                                                                                                                                                                                                                                                                                                                                                                                                                                                                         | Murphy Medical Association                                               | Grubaugh Lab - Yale School of Public Health                                  | Joseph Fauver, Mallery Breban, Isabell Ott, Tara Alpert, Mary Petrone, Anderson Brito, Chantal Vogels, Annie Watkins, Chaney Kalinich, Jessica Rothman, Caleb Neal, Eva Laszlo, Steven Murphy, Nathan Grubaugh                                                                             |
| EPI_ISL_1379220, EPI_ISL_1379221, EPI_ISL_1379224, EPI_ISL_1379226, EPI_ISL_1379231, EPI_ISL_1379236, EPI_ISL_1379240, EPI_ISL_1379247, EPI_ISL_1379255, EPI_ISL_1379262                                                                                                                                                                                                                                                                                                                                                                                                                                                                                                                                                                                                                                                                                                                                                                                                                                                                                                                                                                                                                                                                                                                                                                                                                                                                                                                                                                                                                                                                                                                                                                                                                                                                                                                                                                                                                                                                                                                                                                                                                                                                                                                                                                                                                                                                                                                                                                                                                                                                                                                                                                                                                                                                                                                                                                                                                                                                                                                                                                                                                                                                                                                 | NYP-WCM                                                                  | New York Genome Center                                                       | Michael Zody, Andre Corvelo, Dayna M. Oschwald, Samantha Fennessey, Tom Maniatis, Melissa Cushing, Olivier Elemento, Margaret Elizabeth Ross, Chris Mason, Priya Velu, Hanna Rennert, Arryn Craney, Lars F Westblade                                                                       |
| EPI_ISL_1379268, EPI_ISL_1379283, EPI_ISL_1379303, EPI_ISL_1379304, EPI_ISL_1379325, EPI_ISL_1379337                                                                                                                                                                                                                                                                                                                                                                                                                                                                                                                                                                                                                                                                                                                                                                                                                                                                                                                                                                                                                                                                                                                                                                                                                                                                                                                                                                                                                                                                                                                                                                                                                                                                                                                                                                                                                                                                                                                                                                                                                                                                                                                                                                                                                                                                                                                                                                                                                                                                                                                                                                                                                                                                                                                                                                                                                                                                                                                                                                                                                                                                                                                                                                                     | Hacksack Meridian Health                                                 | New York Genome Center                                                       | Michael Zody, Andre Corvelo, Dayna M. Oschwald, Samantha Fennessey, Tom Maniatis, Liang Chen, Jose Mediavilla, Marcus Cunningham, Kaela Composto, Kar Chow, David Perlin, Barry Kreiswirth                                                                                                 |
| EPI_ISL_1379342, EPI_ISL_1379343, EPI_ISL_1379344, EPI_ISL_1379345, EPI_ISL_1379358, EPI_ISL_1379374, EPI_ISL_1379382, EPI_ISL_1379384, EPI_ISL_1379386                                                                                                                                                                                                                                                                                                                                                                                                                                                                                                                                                                                                                                                                                                                                                                                                                                                                                                                                                                                                                                                                                                                                                                                                                                                                                                                                                                                                                                                                                                                                                                                                                                                                                                                                                                                                                                                                                                                                                                                                                                                                                                                                                                                                                                                                                                                                                                                                                                                                                                                                                                                                                                                                                                                                                                                                                                                                                                                                                                                                                                                                                                                                  | NYP-WCM                                                                  | New York Genome Center                                                       | Michael Zody, Andre Corvelo, Dayna M. Oschwald, Samantha Fennessey, Tom Maniatis, Melissa Cushing, Olivier Elemento, Margaret Elizabeth Ross, Chris Mason, Priya Velu, Hanna Rennert, Arryn Craney, Lars F Westblade                                                                       |
| EPI_ISL_1379974                                                                                                                                                                                                                                                                                                                                                                                                                                                                                                                                                                                                                                                                                                                                                                                                                                                                                                                                                                                                                                                                                                                                                                                                                                                                                                                                                                                                                                                                                                                                                                                                                                                                                                                                                                                                                                                                                                                                                                                                                                                                                                                                                                                                                                                                                                                                                                                                                                                                                                                                                                                                                                                                                                                                                                                                                                                                                                                                                                                                                                                                                                                                                                                                                                                                          | UCLA Clinical Micro Lab                                                  | Los Angeles County PHL                                                       | P. Hemarajata et al.                                                                                                                                                                                                                                                                       |
| EPI_ISL_1381304, EPI_ISL_1381305                                                                                                                                                                                                                                                                                                                                                                                                                                                                                                                                                                                                                                                                                                                                                                                                                                                                                                                                                                                                                                                                                                                                                                                                                                                                                                                                                                                                                                                                                                                                                                                                                                                                                                                                                                                                                                                                                                                                                                                                                                                                                                                                                                                                                                                                                                                                                                                                                                                                                                                                                                                                                                                                                                                                                                                                                                                                                                                                                                                                                                                                                                                                                                                                                                                         | Omics Sciences Laboratory                                                | Omics Sciences Laboratory                                                    | Derly Andrade Molina, Rubén Armas González, Gabriel Morey León, Darlyn Amaya, Katheryn Sacheri Viteri, Emily Sulay Saltos Montalvo, Paula Juliana Gavilanes Jarrin, Juan Carlos Fernández Cadena                                                                                           |
| EPI_ISL_1384639                                                                                                                                                                                                                                                                                                                                                                                                                                                                                                                                                                                                                                                                                                                                                                                                                                                                                                                                                                                                                                                                                                                                                                                                                                                                                                                                                                                                                                                                                                                                                                                                                                                                                                                                                                                                                                                                                                                                                                                                                                                                                                                                                                                                                                                                                                                                                                                                                                                                                                                                                                                                                                                                                                                                                                                                                                                                                                                                                                                                                                                                                                                                                                                                                                                                          | Anteja laboratorija (UAB Diagnostikos laboratorija)                      | Vilnius University Hospital Santaros Klinikos, Center of Laboratory Medicine | Dovile Ezerskyte, Daniel Naumovas, Gytis Dudas, Ingrida Olendraitė, Rimvydas Norvilas, Ligita Raugaite, Monika Katenaite, Mindaugas Stoskus, Laimonas Griskevicius                                                                                                                         |
| EPI_ISL_1384891, EPI_ISL_1384892, EPI_ISL_1384904, EPI_ISL_1384905, EPI_ISL_1384907, EPI_ISL_1384908, EPI_ISL_1384909, EPI_ISL_1384916, EPI_ISL_1384927, EPI_ISL_1384929, EPI_ISL_1384937, EPI_ISL_1384938, EPI_ISL_1384940, EPI_ISL_1384942, EPI_ISL_1384944, EPI_ISL_1384945, EPI_ISL_1384958, EPI_ISL_1384960, EPI_ISL_1384962, EPI_ISL_1384966, EPI_ISL_1384978, EPI_ISL_1384985, EPI_ISL_1384998, EPI_ISL_1385003, EPI_ISL_1385006, EPI_ISL_1385008, EPI_ISL_1385010, EPI_ISL_1385011, EPI_ISL_1385017, EPI_ISL_1385018, EPI_ISL_1385029, EPI_ISL_1385041, EPI_ISL_1385043, EPI_ISL_1385047, EPI_ISL_1385056, EPI_ISL_1385067, EPI_ISL_1385070, EPI_ISL_1385078, EPI_ISL_1385087, EPI_ISL_1385089, EPI_ISL_1385091, EPI_ISL_1385095, EPI_ISL_1385102, EPI_ISL_1385103, EPI_ISL_1385105, EPI_ISL_1385106, EPI_ISL_1385115, EPI_ISL_1385116, EPI_ISL_1385118, EPI_ISL_1385119, EPI_ISL_1385120, EPI_ISL_1385121, EPI_ISL_1385123, EPI_ISL_1385125, EPI_ISL_1385128, EPI_ISL_1385130, EPI_ISL_1385139, EPI_ISL_1385143, EPI_ISL_1385150, EPI_ISL_1385152, EPI_ISL_1385156, EPI_ISL_1385161, EPI_ISL_1385162, EPI_ISL_1385163, EPI_ISL_1385166, EPI_ISL_1385171, EPI_ISL_1385177, EPI_ISL_1385179, EPI_ISL_1385185, EPI_ISL_1385188, EPI_ISL_1385189, EPI_ISL_1385192, EPI_ISL_1385193, EPI_ISL_1385196, EPI_ISL_1385200, EPI_ISL_1385202, EPI_ISL_1385203, EPI_ISL_1385206, EPI_ISL_1385212, EPI_ISL_1385219, EPI_ISL_1385221, EPI_ISL_1385231, EPI_ISL_1385232, EPI_ISL_1385236, EPI_ISL_1385239, EPI_ISL_1385242, EPI_ISL_1385243, EPI_ISL_1385244, EPI_ISL_1385245, EPI_ISL_1385249, EPI_ISL_1385255, EPI_ISL_1385257, EPI_ISL_1385276, EPI_ISL_1385279, EPI_ISL_1385291, EPI_ISL_1385298, EPI_ISL_1385310, EPI_ISL_1385322, EPI_ISL_1385329, EPI_ISL_1385333, EPI_ISL_1385343, EPI_ISL_1385347, EPI_ISL_1385351, EPI_ISL_1385356, EPI_ISL_1385361, EPI_ISL_1385363, EPI_ISL_1385364, EPI_ISL_1385366, EPI_ISL_1385370, EPI_ISL_1385375, EPI_ISL_1385376, EPI_ISL_1385393, EPI_ISL_1385394, EPI_ISL_1385395, EPI_ISL_1385401, EPI_ISL_1385402, EPI_ISL_1385403, EPI_ISL_1385413, EPI_ISL_1385414, EPI_ISL_1385415, EPI_ISL_1385416, EPI_ISL_1385420, EPI_ISL_1385425, EPI_ISL_1385434, EPI_ISL_1385436, EPI_ISL_1385456, EPI_ISL_1385457, EPI_ISL_1385473, EPI_ISL_1385481, EPI_ISL_1385492, EPI_ISL_1385495, EPI_ISL_1385500, EPI_ISL_1385504, EPI_ISL_1385514, EPI_ISL_1385517, EPI_ISL_1385521, EPI_ISL_1385531, EPI_ISL_1385535, EPI_ISL_1385547, EPI_ISL_1385550, EPI_ISL_1385552, EPI_ISL_1385554, EPI_ISL_1385560, EPI_ISL_1385562, EPI_ISL_1385564, EPI_ISL_1385567, EPI_ISL_1385577, EPI_ISL_1385579, EPI_ISL_1385584, EPI_ISL_1385589, EPI_ISL_1385591, EPI_ISL_1385592, EPI_ISL_1385597, EPI_ISL_1385603, EPI_ISL_1385606, EPI_ISL_1385616, EPI_ISL_1385617, EPI_ISL_1385625, EPI_ISL_1385628, EPI_ISL_1385640, EPI_ISL_1385647, EPI_ISL_1385652, EPI_ISL_1385654, EPI_ISL_1385660, EPI_ISL_1385665, EPI_ISL_1385667, EPI_ISL_1385674, EPI_ISL_1385679, EPI_ISL_1385687, EPI_ISL_1385695, EPI_ISL_1385696, EPI_ISL_1385698, EPI_ISL_1385702, EPI_ISL_1385703, EPI_ISL_1385709, EPI_ISL_1385712, EPI_ISL_1385728, EPI_ISL_1385731, EPI_ISL_1385742, EPI_ISL_1385743, EPI_ISL_1385746, EPI_ISL_1385754, EPI_ISL_1385760, EPI_ISL_1385761, EPI_ISL_1385776, EPI_ISL_1385780 |                                                                          |                                                                              |                                                                                                                                                                                                                                                                                            |
| see above                                                                                                                                                                                                                                                                                                                                                                                                                                                                                                                                                                                                                                                                                                                                                                                                                                                                                                                                                                                                                                                                                                                                                                                                                                                                                                                                                                                                                                                                                                                                                                                                                                                                                                                                                                                                                                                                                                                                                                                                                                                                                                                                                                                                                                                                                                                                                                                                                                                                                                                                                                                                                                                                                                                                                                                                                                                                                                                                                                                                                                                                                                                                                                                                                                                                                | Pandemic Response Lab - NYC                                              | Pandemic Response Lab, R&D                                                   | Henry Lee, Michael Hammerling, Melissa Hopkins, Cybill del Castillo, Shinyoung Clair Kang, William Ward, Pradeep Bugga, Sol Rey, Dylan Law, Haiping Hao, Jon Laurent                                                                                                                       |
| EPI_ISL_1395744, EPI_ISL_1395747, EPI_ISL_1395748                                                                                                                                                                                                                                                                                                                                                                                                                                                                                                                                                                                                                                                                                                                                                                                                                                                                                                                                                                                                                                                                                                                                                                                                                                                                                                                                                                                                                                                                                                                                                                                                                                                                                                                                                                                                                                                                                                                                                                                                                                                                                                                                                                                                                                                                                                                                                                                                                                                                                                                                                                                                                                                                                                                                                                                                                                                                                                                                                                                                                                                                                                                                                                                                                                        | Columbia University Irving Medical Center                                | Wadsworth Center, New York State Department of Health                        | Kirsten St. George, Daryl M. Lamson, Alexis Russel, Matthew Shudt, Melissa A Leisner, Jonathan Plitnick, Navjot Singh, John Kelly, Erasmus Schneider, Erica Lasek-Nesselquist                                                                                                              |
| EPI_ISL_1395750                                                                                                                                                                                                                                                                                                                                                                                                                                                                                                                                                                                                                                                                                                                                                                                                                                                                                                                                                                                                                                                                                                                                                                                                                                                                                                                                                                                                                                                                                                                                                                                                                                                                                                                                                                                                                                                                                                                                                                                                                                                                                                                                                                                                                                                                                                                                                                                                                                                                                                                                                                                                                                                                                                                                                                                                                                                                                                                                                                                                                                                                                                                                                                                                                                                                          | NORTH SHORE UNIVERSITY HOSPITAL                                          | Wadsworth Center, New York State Department of Health                        | Kirsten St. George, Daryl M. Lamson, Alexis Russel, Matthew Shudt, Melissa A Leisner, Jonathan Plitnick, Navjot Singh, John Kelly, Erasmus Schneider, Erica Lasek-Nesselquist                                                                                                              |
| EPI_ISL_1395755, EPI_ISL_1395759                                                                                                                                                                                                                                                                                                                                                                                                                                                                                                                                                                                                                                                                                                                                                                                                                                                                                                                                                                                                                                                                                                                                                                                                                                                                                                                                                                                                                                                                                                                                                                                                                                                                                                                                                                                                                                                                                                                                                                                                                                                                                                                                                                                                                                                                                                                                                                                                                                                                                                                                                                                                                                                                                                                                                                                                                                                                                                                                                                                                                                                                                                                                                                                                                                                         | SUNY UPSTATE MEDICAL UNIVERSITY                                          | Wadsworth Center, New York State Department of Health                        | Kirsten St. George, Daryl M. Lamson, Alexis Russel, Matthew Shudt, Melissa A Leisner, Jonathan Plitnick, Navjot Singh, John Kelly, Erasmus Schneider, Erica Lasek-Nesselquist                                                                                                              |
| EPI_ISL_1395760                                                                                                                                                                                                                                                                                                                                                                                                                                                                                                                                                                                                                                                                                                                                                                                                                                                                                                                                                                                                                                                                                                                                                                                                                                                                                                                                                                                                                                                                                                                                                                                                                                                                                                                                                                                                                                                                                                                                                                                                                                                                                                                                                                                                                                                                                                                                                                                                                                                                                                                                                                                                                                                                                                                                                                                                                                                                                                                                                                                                                                                                                                                                                                                                                                                                          | NORTH SHORE UNIVERSITY HOSPITAL                                          | Wadsworth Center, New York State Department of Health                        | Kirsten St. George, Daryl M. Lamson, Alexis Russel, Matthew Shudt, Melissa A Leisner, Jonathan Plitnick, Navjot Singh, John Kelly, Erasmus Schneider, Erica Lasek-Nesselquist                                                                                                              |
| EPI_ISL_1395770, EPI_ISL_1395776                                                                                                                                                                                                                                                                                                                                                                                                                                                                                                                                                                                                                                                                                                                                                                                                                                                                                                                                                                                                                                                                                                                                                                                                                                                                                                                                                                                                                                                                                                                                                                                                                                                                                                                                                                                                                                                                                                                                                                                                                                                                                                                                                                                                                                                                                                                                                                                                                                                                                                                                                                                                                                                                                                                                                                                                                                                                                                                                                                                                                                                                                                                                                                                                                                                         | SUNY UPSTATE MEDICAL UNIVERSITY                                          | Wadsworth Center, New York State Department of Health                        | Kirsten St. George, Daryl M. Lamson, Alexis Russel, Matthew Shudt, Melissa A Leisner, Jonathan Plitnick, Navjot Singh, John Kelly, Erasmus Schneider, Erica Lasek-Nesselquist                                                                                                              |
| EPI_ISL_1397515, EPI_ISL_1397528                                                                                                                                                                                                                                                                                                                                                                                                                                                                                                                                                                                                                                                                                                                                                                                                                                                                                                                                                                                                                                                                                                                                                                                                                                                                                                                                                                                                                                                                                                                                                                                                                                                                                                                                                                                                                                                                                                                                                                                                                                                                                                                                                                                                                                                                                                                                                                                                                                                                                                                                                                                                                                                                                                                                                                                                                                                                                                                                                                                                                                                                                                                                                                                                                                                         | New York Presbyterian Hospital                                           | Wadsworth Center, New York State Department of Health                        | Kirsten St. George, Daryl M. Lamson, Alexis Russel, Matthew Shudt, Melissa A Leisner, Jonathan Plitnick, Navjot Singh, John Kelly, Erasmus Schneider, Erica Lasek-Nesselquist                                                                                                              |
| EPI_ISL_1397593, EPI_ISL_1397595, EPI_ISL_1397597, EPI_ISL_1397611                                                                                                                                                                                                                                                                                                                                                                                                                                                                                                                                                                                                                                                                                                                                                                                                                                                                                                                                                                                                                                                                                                                                                                                                                                                                                                                                                                                                                                                                                                                                                                                                                                                                                                                                                                                                                                                                                                                                                                                                                                                                                                                                                                                                                                                                                                                                                                                                                                                                                                                                                                                                                                                                                                                                                                                                                                                                                                                                                                                                                                                                                                                                                                                                                       | SUNY UPSTATE MEDICAL UNIVERSITY                                          | Wadsworth Center, New York State Department of Health                        | Kirsten St. George, Daryl M. Lamson, Alexis Russel, Matthew Shudt, Melissa A Leisner, Jonathan Plitnick, Navjot Singh, John Kelly, Erasmus Schneider, Erica Lasek-Nesselquist                                                                                                              |
| EPI_ISL_1397618, EPI_ISL_1397620                                                                                                                                                                                                                                                                                                                                                                                                                                                                                                                                                                                                                                                                                                                                                                                                                                                                                                                                                                                                                                                                                                                                                                                                                                                                                                                                                                                                                                                                                                                                                                                                                                                                                                                                                                                                                                                                                                                                                                                                                                                                                                                                                                                                                                                                                                                                                                                                                                                                                                                                                                                                                                                                                                                                                                                                                                                                                                                                                                                                                                                                                                                                                                                                                                                         | MONTEFIORE MEDICAL CENTER LABORATORIES                                   | Wadsworth Center, New York State Department of Health                        | Kirsten St. George, Daryl M. Lamson, Alexis Russel, Matthew Shudt, Melissa A Leisner, Jonathan Plitnick, Navjot Singh, John Kelly, Erasmus Schneider, Erica Lasek-Nesselquist                                                                                                              |
| EPI_ISL_1397636, EPI_ISL_1397638, EPI_ISL_1397639                                                                                                                                                                                                                                                                                                                                                                                                                                                                                                                                                                                                                                                                                                                                                                                                                                                                                                                                                                                                                                                                                                                                                                                                                                                                                                                                                                                                                                                                                                                                                                                                                                                                                                                                                                                                                                                                                                                                                                                                                                                                                                                                                                                                                                                                                                                                                                                                                                                                                                                                                                                                                                                                                                                                                                                                                                                                                                                                                                                                                                                                                                                                                                                                                                        | Columbia University Irving Medical Center                                | Wadsworth Center, New York State Department of Health                        | Kirsten St. George, Daryl M. Lamson, Alexis Russel, Matthew Shudt, Melissa A Leisner, Jonathan Plitnick, Navjot Singh, John Kelly, Erasmus Schneider, Erica Lasek-Nesselquist                                                                                                              |



|                                                                                                                                                                                                                                                                                                                                                                                                                                                                                                                                               |                                                                    |                                                                            |                                                                                                                                                                                                                                                                                                                                                                                                                                                                         |
|-----------------------------------------------------------------------------------------------------------------------------------------------------------------------------------------------------------------------------------------------------------------------------------------------------------------------------------------------------------------------------------------------------------------------------------------------------------------------------------------------------------------------------------------------|--------------------------------------------------------------------|----------------------------------------------------------------------------|-------------------------------------------------------------------------------------------------------------------------------------------------------------------------------------------------------------------------------------------------------------------------------------------------------------------------------------------------------------------------------------------------------------------------------------------------------------------------|
| EPI_ISL_1397651, EPI_ISL_1397656, EPI_ISL_1397666, EPI_ISL_1397668, EPI_ISL_1397677, EPI_ISL_1397683, EPI_ISL_1397687                                                                                                                                                                                                                                                                                                                                                                                                                         | NORTH SHORE UNIVERSITY HOSPITAL                                    | Wadsworth Center, New York State Department of Health                      | Kirsten St. George, Daryl M. Lamson, Alexis Russel, Matthew Shudt, Melissa A Leisner, Jonathan Plitnick, Navjot Singh, John Kelly, Erasmus Schneider, Erica Lasek-Nesselquist                                                                                                                                                                                                                                                                                           |
| EPI_ISL_1397749                                                                                                                                                                                                                                                                                                                                                                                                                                                                                                                               | ADIRONDACK MEDICAL CENTER                                          | Wadsworth Center, New York State Department of Health                      | Kirsten St. George, Daryl M. Lamson, Alexis Russel, Matthew Shudt, Melissa A Leisner, Jonathan Plitnick, Navjot Singh, John Kelly, Erasmus Schneider, Erica Lasek-Nesselquist                                                                                                                                                                                                                                                                                           |
| EPI_ISL_1397762                                                                                                                                                                                                                                                                                                                                                                                                                                                                                                                               | ALBANY MEDICAL CENTER                                              | Wadsworth Center, New York State Department of Health                      | Kirsten St. George, Daryl M. Lamson, Alexis Russel, Matthew Shudt, Melissa A Leisner, Jonathan Plitnick, Navjot Singh, John Kelly, Erasmus Schneider, Erica Lasek-Nesselquist                                                                                                                                                                                                                                                                                           |
| EPI_ISL_1397793, EPI_ISL_1397805, EPI_ISL_1397806, EPI_ISL_1397807                                                                                                                                                                                                                                                                                                                                                                                                                                                                            | MONTEFIORE MEDICAL CENTER LABORATORIES                             | Wadsworth Center, New York State Department of Health                      | Kirsten St. George, Daryl M. Lamson, Alexis Russel, Matthew Shudt, Melissa A Leisner, Jonathan Plitnick, Navjot Singh, John Kelly, Erasmus Schneider, Erica Lasek-Nesselquist                                                                                                                                                                                                                                                                                           |
| EPI_ISL_1397824                                                                                                                                                                                                                                                                                                                                                                                                                                                                                                                               | Columbia University Irving Medical Center                          | Wadsworth Center, New York State Department of Health                      | Kirsten St. George, Daryl M. Lamson, Alexis Russel, Matthew Shudt, Melissa A Leisner, Jonathan Plitnick, Navjot Singh, John Kelly, Erasmus Schneider, Erica Lasek-Nesselquist                                                                                                                                                                                                                                                                                           |
| EPI_ISL_1397831                                                                                                                                                                                                                                                                                                                                                                                                                                                                                                                               | STONY BROOK UNIVERSITY HOSPITAL                                    | Wadsworth Center, New York State Department of Health                      | Kirsten St. George, Daryl M. Lamson, Alexis Russel, Matthew Shudt, Melissa A Leisner, Jonathan Plitnick, Navjot Singh, John Kelly, Erasmus Schneider, Erica Lasek-Nesselquist                                                                                                                                                                                                                                                                                           |
| EPI_ISL_1397867                                                                                                                                                                                                                                                                                                                                                                                                                                                                                                                               | ALBANY MEDICAL CENTER                                              | Wadsworth Center, New York State Department of Health                      | Kirsten St. George, Daryl M. Lamson, Alexis Russel, Matthew Shudt, Melissa A Leisner, Jonathan Plitnick, Navjot Singh, John Kelly, Erasmus Schneider, Erica Lasek-Nesselquist                                                                                                                                                                                                                                                                                           |
| EPI_ISL_1397873, EPI_ISL_1397881, EPI_ISL_1397882                                                                                                                                                                                                                                                                                                                                                                                                                                                                                             | MONTEFIORE MEDICAL CENTER LABORATORIES                             | Wadsworth Center, New York State Department of Health                      | Kirsten St. George, Daryl M. Lamson, Alexis Russel, Matthew Shudt, Melissa A Leisner, Jonathan Plitnick, Navjot Singh, John Kelly, Erasmus Schneider, Erica Lasek-Nesselquist                                                                                                                                                                                                                                                                                           |
| EPI_ISL_1397888, EPI_ISL_1397897, EPI_ISL_1397900, EPI_ISL_1397904                                                                                                                                                                                                                                                                                                                                                                                                                                                                            | Columbia University Irving Medical Center                          | Wadsworth Center, New York State Department of Health                      | Kirsten St. George, Daryl M. Lamson, Alexis Russel, Matthew Shudt, Melissa A Leisner, Jonathan Plitnick, Navjot Singh, John Kelly, Erasmus Schneider, Erica Lasek-Nesselquist                                                                                                                                                                                                                                                                                           |
| EPI_ISL_1397909                                                                                                                                                                                                                                                                                                                                                                                                                                                                                                                               | NORTHWELL HEALTH LABORATORIES                                      | Wadsworth Center, New York State Department of Health                      | Kirsten St. George, Daryl M. Lamson, Alexis Russel, Matthew Shudt, Melissa A Leisner, Jonathan Plitnick, Navjot Singh, John Kelly, Erasmus Schneider, Erica Lasek-Nesselquist                                                                                                                                                                                                                                                                                           |
| EPI_ISL_1397928, EPI_ISL_1397937, EPI_ISL_1397939, EPI_ISL_1397942, EPI_ISL_1397948                                                                                                                                                                                                                                                                                                                                                                                                                                                           | WESTCHESTER MEDICAL CENTER                                         | Wadsworth Center, New York State Department of Health                      | Kirsten St. George, Daryl M. Lamson, Alexis Russel, Matthew Shudt, Melissa A Leisner, Jonathan Plitnick, Navjot Singh, John Kelly, Erasmus Schneider, Erica Lasek-Nesselquist                                                                                                                                                                                                                                                                                           |
| EPI_ISL_1398023                                                                                                                                                                                                                                                                                                                                                                                                                                                                                                                               | ALBANY MEDICAL CENTER                                              | Wadsworth Center, New York State Department of Health                      | Kirsten St. George, Daryl M. Lamson, Alexis Russel, Matthew Shudt, Melissa A Leisner, Jonathan Plitnick, Navjot Singh, John Kelly, Erasmus Schneider, Erica Lasek-Nesselquist                                                                                                                                                                                                                                                                                           |
| EPI_ISL_1398036, EPI_ISL_1398048, EPI_ISL_1398049, EPI_ISL_1398050, EPI_ISL_1398052, EPI_ISL_1398057, EPI_ISL_1398064, EPI_ISL_1398065, EPI_ISL_1398066                                                                                                                                                                                                                                                                                                                                                                                       | MONTEFIORE MEDICAL CENTER LABORATORIES                             | Wadsworth Center, New York State Department of Health                      | Kirsten St. George, Daryl M. Lamson, Alexis Russel, Matthew Shudt, Melissa A Leisner, Jonathan Plitnick, Navjot Singh, John Kelly, Erasmus Schneider, Erica Lasek-Nesselquist                                                                                                                                                                                                                                                                                           |
| EPI_ISL_1398068, EPI_ISL_1398070, EPI_ISL_1398072, EPI_ISL_1398074, EPI_ISL_1398080, EPI_ISL_1398081, EPI_ISL_1398082, EPI_ISL_1398084, EPI_ISL_1398086, EPI_ISL_1398095, EPI_ISL_1398112, EPI_ISL_1398119                                                                                                                                                                                                                                                                                                                                    | see above                                                          | NORTHWELL HEALTH LABORATORIES                                              | Wadsworth Center, New York State Department of Health                                                                                                                                                                                                                                                                                                                                                                                                                   |
| EPI_ISL_1398134                                                                                                                                                                                                                                                                                                                                                                                                                                                                                                                               | MONTEFIORE MEDICAL CENTER LABORATORIES                             | Wadsworth Center, New York State Department of Health                      | Kirsten St. George, Daryl M. Lamson, Alexis Russel, Matthew Shudt, Melissa A Leisner, Jonathan Plitnick, Navjot Singh, John Kelly, Erasmus Schneider, Erica Lasek-Nesselquist                                                                                                                                                                                                                                                                                           |
| EPI_ISL_1398145, EPI_ISL_1398169, EPI_ISL_1398172, EPI_ISL_1398173, EPI_ISL_1398178, EPI_ISL_1398186, EPI_ISL_1398187, EPI_ISL_1398188, EPI_ISL_1398190, EPI_ISL_1398192, EPI_ISL_1398194, EPI_ISL_1398196, EPI_ISL_1398202                                                                                                                                                                                                                                                                                                                   | see above                                                          | Columbia University Irving Medical Center                                  | Wadsworth Center, New York State Department of Health                                                                                                                                                                                                                                                                                                                                                                                                                   |
| EPI_ISL_1398268                                                                                                                                                                                                                                                                                                                                                                                                                                                                                                                               | WHITE PLAINS HOSPITAL CENTER LABORATORY                            | Wadsworth Center, New York State Department of Health                      | Kirsten St. George, Daryl M. Lamson, Alexis Russel, Matthew Shudt, Melissa A Leisner, Jonathan Plitnick, Navjot Singh, John Kelly, Erasmus Schneider, Erica Lasek-Nesselquist                                                                                                                                                                                                                                                                                           |
| EPI_ISL_1398285, EPI_ISL_1398300                                                                                                                                                                                                                                                                                                                                                                                                                                                                                                              | NYC Pandemic Response Lab                                          | Wadsworth Center, New York State Department of Health                      | Kirsten St. George, Daryl M. Lamson, Alexis Russel, Matthew Shudt, Melissa A Leisner, Jonathan Plitnick, Navjot Singh, John Kelly, Erasmus Schneider, Erica Lasek-Nesselquist                                                                                                                                                                                                                                                                                           |
| EPI_ISL_1398313                                                                                                                                                                                                                                                                                                                                                                                                                                                                                                                               | URMC LABS                                                          | Wadsworth Center, New York State Department of Health                      | Kirsten St. George, Daryl M. Lamson, Alexis Russel, Matthew Shudt, Melissa A Leisner, Jonathan Plitnick, Navjot Singh, John Kelly, Erasmus Schneider, Erica Lasek-Nesselquist                                                                                                                                                                                                                                                                                           |
| EPI_ISL_1398326, EPI_ISL_1398327, EPI_ISL_1398330                                                                                                                                                                                                                                                                                                                                                                                                                                                                                             | NYC Pandemic Response Lab                                          | Wadsworth Center, New York State Department of Health                      | Kirsten St. George, Daryl M. Lamson, Alexis Russel, Matthew Shudt, Melissa A Leisner, Jonathan Plitnick, Navjot Singh, John Kelly, Erasmus Schneider, Erica Lasek-Nesselquist                                                                                                                                                                                                                                                                                           |
| EPI_ISL_1398337, EPI_ISL_1398339                                                                                                                                                                                                                                                                                                                                                                                                                                                                                                              | MONTEFIORE MEDICAL CENTER LABORATORIES                             | Wadsworth Center, New York State Department of Health                      | Kirsten St. George, Daryl M. Lamson, Alexis Russel, Matthew Shudt, Melissa A Leisner, Jonathan Plitnick, Navjot Singh, John Kelly, Erasmus Schneider, Erica Lasek-Nesselquist                                                                                                                                                                                                                                                                                           |
| EPI_ISL_1398344, EPI_ISL_1398348, EPI_ISL_1398349                                                                                                                                                                                                                                                                                                                                                                                                                                                                                             | NYC Pandemic Response Lab                                          | Wadsworth Center, New York State Department of Health                      | Kirsten St. George, Daryl M. Lamson, Alexis Russel, Matthew Shudt, Melissa A Leisner, Jonathan Plitnick, Navjot Singh, John Kelly, Erasmus Schneider, Erica Lasek-Nesselquist                                                                                                                                                                                                                                                                                           |
| EPI_ISL_1399589, EPI_ISL_1399590                                                                                                                                                                                                                                                                                                                                                                                                                                                                                                              | Instituto Nacional de Saude (INSA)                                 | Instituto Nacional de Saude (INSA)                                         | Borges et al                                                                                                                                                                                                                                                                                                                                                                                                                                                            |
| EPI_ISL_1401473, EPI_ISL_1401477, EPI_ISL_1401478, EPI_ISL_1401479, EPI_ISL_1401481, EPI_ISL_1401483, EPI_ISL_1401484, EPI_ISL_1401485, EPI_ISL_1401486, EPI_ISL_1401489, EPI_ISL_1401490, EPI_ISL_1401492, EPI_ISL_1401504, EPI_ISL_1401507, EPI_ISL_1401508, EPI_ISL_1401510, EPI_ISL_1401511, EPI_ISL_1401515, EPI_ISL_1401517, EPI_ISL_1401521, EPI_ISL_1401523, EPI_ISL_1401525, EPI_ISL_1401526, EPI_ISL_1401527, EPI_ISL_1401530, EPI_ISL_1401534, EPI_ISL_1401540, EPI_ISL_1401542, EPI_ISL_1401550, EPI_ISL_1401553, EPI_ISL_1401558 | see above                                                          | The Jackson Laboratory                                                     | Bergeron D, Uvalic J, Renzette N, Adams M, Omerza G, Kelly K, Li L                                                                                                                                                                                                                                                                                                                                                                                                      |
| EPI_ISL_1403004                                                                                                                                                                                                                                                                                                                                                                                                                                                                                                                               | Hospital of the University of Pennsylvania Molecular Pathology Lab | Bushman Lab - University of Pennsylvania                                   | John Everett, Kyle Rodino, Shantanu Reddy, Pascha Hokama, Aoife M. Roche, Young Hwang, Abigail Glascock, Scott Sherrill-Mix, Samantha A. Whiteside, Jevon Graham-Wooten, Layla A. Khatib, Ayannah S. Fitzgerald, Arupa Ganguly, Mike Feldman, Brendan Kelly, Ronald G. Collman and Frederic Bushman                                                                                                                                                                     |
| EPI_ISL_1405013, EPI_ISL_1405016, EPI_ISL_1405026, EPI_ISL_1405027, EPI_ISL_1405033, EPI_ISL_1405034                                                                                                                                                                                                                                                                                                                                                                                                                                          | NJDOH, Public Health and Environmental Laboratories                | New Jersey Public Health and Environmental Laboratories (NJ PHEL)          | Lindsey Bodnar, Shiv K. Verma, Dana Woell, Byeong Jeong                                                                                                                                                                                                                                                                                                                                                                                                                 |
| EPI_ISL_1406656                                                                                                                                                                                                                                                                                                                                                                                                                                                                                                                               | Centre De Prelevement COVID RIOM                                   | CHU Clermont-Ferrand, service de virologie                                 | Bisseux Maxime, Mirand Audrey, Combes Patricia, Henquell Cécile                                                                                                                                                                                                                                                                                                                                                                                                         |
| EPI_ISL_1406657                                                                                                                                                                                                                                                                                                                                                                                                                                                                                                                               | Centre De Prélèvement COVID VICHY                                  | CHU Clermont-Ferrand, service de virologie                                 | Bisseux Maxime, Mirand Audrey, Combes Patricia, Henquell Cécile                                                                                                                                                                                                                                                                                                                                                                                                         |
| EPI_ISL_1408479                                                                                                                                                                                                                                                                                                                                                                                                                                                                                                                               | Viollier AG                                                        | Department of Biosystems Science and Engineering, ETH Zürich               | Chaoran Chen, Sarah Nadeau, Catharine Aquino, Ivan Topolsky, Philipp Jablonski, Lara Fuhrmann, David Dreifuss, Katharina Jahn, Andrea Cabral de Gouvea, Maria Domenica Moccia, Simon Grüter, Timothy Sykes, Lennart Opitz, Griffin White, Laura Neff, Doris Popovic, Andrea Patrignani, Jay Tracy, Ralph Schlapbach, Christiane Beckmann, Maurice Redondo, Olivier Kobel, Christoph Noppen, Sophie Seidel, Noemie Santamaria de Souza, Niko Beerenwinkel, Tanja Stadler |
| EPI_ISL_1410112                                                                                                                                                                                                                                                                                                                                                                                                                                                                                                                               | Lighthouse Lab in Cambridge                                        | Wellcome Sanger Institute for the COVID-19 Genomics UK (COG-UK) Consortium | Rob Howes, The Lighthouse Lab in Cambridge and Alex Alderton, Roberto Amato, Jeffrey Barrett, Sonia Goncalves, Ewan Harrison, David K. Jackson, Ian Johnston, Dominic Kwiatkowski, Cordelia Langford, John Sillitoe on behalf of the Wellcome Sanger Institute COVID-19 Surveillance Team                                                                                                                                                                               |
| EPI_ISL_1413154, EPI_ISL_1413193, EPI_ISL_1413221, EPI_ISL_1413316,                                                                                                                                                                                                                                                                                                                                                                                                                                                                           | Broad Institute Clinical Research Sequencing Platform              | Infectious Disease Program, Broad Institute of Harvard and MIT             | Siddle,K.J., Adams,G., Pearlman,L., Gladden-Young,A., Vicente,G., Blumenstiel,B., DeFelice,M., Lee,M., McGovern,S., Lagerborg,K., Rudy,M., DeRuff,K., Carter,A., Normandin,E., Bauer,M., Reilly,S., Tomkins-Tinch,C., Loreth,C., Chaluvadi,S., Meldrim,J., Granger,B., Lemieux,J.E., Birren,B.W., Sabeti,P.C.,                                                                                                                                                          |

|                                                                                                                                                                                                                                                                                                                                                                                                                                                                                                                                                                                                                                                                                                                                                                                                                               |                                                                          |                                                                                                                      |                                                                                                                                                                                                                                                                                                                                                                                                                                                                                                                                                                                                                                                                                                                                                   |
|-------------------------------------------------------------------------------------------------------------------------------------------------------------------------------------------------------------------------------------------------------------------------------------------------------------------------------------------------------------------------------------------------------------------------------------------------------------------------------------------------------------------------------------------------------------------------------------------------------------------------------------------------------------------------------------------------------------------------------------------------------------------------------------------------------------------------------|--------------------------------------------------------------------------|----------------------------------------------------------------------------------------------------------------------|---------------------------------------------------------------------------------------------------------------------------------------------------------------------------------------------------------------------------------------------------------------------------------------------------------------------------------------------------------------------------------------------------------------------------------------------------------------------------------------------------------------------------------------------------------------------------------------------------------------------------------------------------------------------------------------------------------------------------------------------------|
| EPI_ISL_1413498                                                                                                                                                                                                                                                                                                                                                                                                                                                                                                                                                                                                                                                                                                                                                                                                               |                                                                          |                                                                                                                      | Larkin,K., Dodge,S., Lennon,N., Madoff,L., Brown,C., Gallagher,G., Smole,S., Park,D.J., Gabriel,S., and MacInnis,B.L.                                                                                                                                                                                                                                                                                                                                                                                                                                                                                                                                                                                                                             |
| EPI_ISL_1422232                                                                                                                                                                                                                                                                                                                                                                                                                                                                                                                                                                                                                                                                                                                                                                                                               | University of Wisconsin-Madison AIDS Vaccine Research Laboratories       | University of Wisconsin-Madison AIDS Vaccine Research Laboratories                                                   | Gage Moreno, Katarina Braun, et al. AIDS Vaccine Research Laboratories                                                                                                                                                                                                                                                                                                                                                                                                                                                                                                                                                                                                                                                                            |
| EPI_ISL_1423379, EPI_ISL_1423400, EPI_ISL_1423411, EPI_ISL_1423419, EPI_ISL_1423421, EPI_ISL_1423428, EPI_ISL_1423430, EPI_ISL_1423438, EPI_ISL_1423441, EPI_ISL_1423452, EPI_ISL_1423459, EPI_ISL_1423476, EPI_ISL_1423481, EPI_ISL_1423485, EPI_ISL_1423494, EPI_ISL_1423495, EPI_ISL_1423500, EPI_ISL_1423503                                                                                                                                                                                                                                                                                                                                                                                                                                                                                                              |                                                                          |                                                                                                                      |                                                                                                                                                                                                                                                                                                                                                                                                                                                                                                                                                                                                                                                                                                                                                   |
| see above                                                                                                                                                                                                                                                                                                                                                                                                                                                                                                                                                                                                                                                                                                                                                                                                                     | NYU Langone Health                                                       | Departments of Pathology and Medicine, New York University School of Medicine                                        | Adriana Heguy, Dacia Dimartino, Emily Guzman, Christian Marier, Peter Meyn, Sitharam Ramaswami, Gael Westby, Paul Zappile, Yutong Zhang, Paolo Cotzia, Guiqing Wang                                                                                                                                                                                                                                                                                                                                                                                                                                                                                                                                                                               |
| EPI_ISL_1424140                                                                                                                                                                                                                                                                                                                                                                                                                                                                                                                                                                                                                                                                                                                                                                                                               | Oregon State Public Health Laboratory                                    | Oregon State Public Health Laboratory                                                                                | LaDonna Grenz, Karim Morey, Joel R. Sevinsky, Kevin, G. Libuit, John Fontana, Shane Sevey                                                                                                                                                                                                                                                                                                                                                                                                                                                                                                                                                                                                                                                         |
| EPI_ISL_1443675, EPI_ISL_1443676, EPI_ISL_1443680                                                                                                                                                                                                                                                                                                                                                                                                                                                                                                                                                                                                                                                                                                                                                                             | Omics Sciences Laboratory                                                | Omics Sciences Laboratory                                                                                            | Derly Andrade Molina, Rubén Armas González, Gabriel Morey León, Darlyn Amaya, Kathryn Sacheri Viteri, Emily Sulay Salto Montalvo, Paula Juliana Gavilanes Jarrin, Juan Carlos Fernández Cadena                                                                                                                                                                                                                                                                                                                                                                                                                                                                                                                                                    |
| EPI_ISL_1443892                                                                                                                                                                                                                                                                                                                                                                                                                                                                                                                                                                                                                                                                                                                                                                                                               | Outre mer                                                                | National Reference Center for Viruses of Respiratory Infections, Institut Pasteur, Paris                             | Marion Barbet, Sylvie Behillil, Méline Bizard, Frédéric Lemoine, Corinne Maufrais, Christophe Malabat, Angela Brisebarre, Camille Capel, Louise Lefrançois, Etienne Simon-Lorière, Vincent Enouf, Maud Vanpeene, Sylvie van der Werf, Stéphanie Guyomard-Rabenirina                                                                                                                                                                                                                                                                                                                                                                                                                                                                               |
| EPI_ISL_1446204                                                                                                                                                                                                                                                                                                                                                                                                                                                                                                                                                                                                                                                                                                                                                                                                               | Texas Children's Hospital                                                | Texas Children's Microbiome Center                                                                                   | Ruth Ann Luna, Jennifer K. Spinler, James Dunn, James Versalovic, Ila Singh                                                                                                                                                                                                                                                                                                                                                                                                                                                                                                                                                                                                                                                                       |
| EPI_ISL_1447088                                                                                                                                                                                                                                                                                                                                                                                                                                                                                                                                                                                                                                                                                                                                                                                                               | DOHMH Corona                                                             | New York City Public Health Laboratory                                                                               | Jade Wang, et al.                                                                                                                                                                                                                                                                                                                                                                                                                                                                                                                                                                                                                                                                                                                                 |
| EPI_ISL_1447090                                                                                                                                                                                                                                                                                                                                                                                                                                                                                                                                                                                                                                                                                                                                                                                                               | DOHMH Morrisania                                                         | New York City Public Health Laboratory                                                                               | Jade Wang, et al.                                                                                                                                                                                                                                                                                                                                                                                                                                                                                                                                                                                                                                                                                                                                 |
| EPI_ISL_1447091                                                                                                                                                                                                                                                                                                                                                                                                                                                                                                                                                                                                                                                                                                                                                                                                               | OCME Office Of Chief Medical Examiner                                    | New York City Public Health Laboratory                                                                               | Jade Wang, et al.                                                                                                                                                                                                                                                                                                                                                                                                                                                                                                                                                                                                                                                                                                                                 |
| EPI_ISL_1447092                                                                                                                                                                                                                                                                                                                                                                                                                                                                                                                                                                                                                                                                                                                                                                                                               | DOHMH Jamaica                                                            | New York City Public Health Laboratory                                                                               | Jade Wang, et al.                                                                                                                                                                                                                                                                                                                                                                                                                                                                                                                                                                                                                                                                                                                                 |
| EPI_ISL_1447100                                                                                                                                                                                                                                                                                                                                                                                                                                                                                                                                                                                                                                                                                                                                                                                                               | OCME Office Of Chief Medical Examiner                                    | New York City Public Health Laboratory                                                                               | Jade Wang, et al.                                                                                                                                                                                                                                                                                                                                                                                                                                                                                                                                                                                                                                                                                                                                 |
| EPI_ISL_1447102                                                                                                                                                                                                                                                                                                                                                                                                                                                                                                                                                                                                                                                                                                                                                                                                               | Department of Homeless Services                                          | New York City Public Health Laboratory                                                                               | Jade Wang, et al.                                                                                                                                                                                                                                                                                                                                                                                                                                                                                                                                                                                                                                                                                                                                 |
| EPI_ISL_1447103, EPI_ISL_1447106                                                                                                                                                                                                                                                                                                                                                                                                                                                                                                                                                                                                                                                                                                                                                                                              | DOHMH Jamaica                                                            | New York City Public Health Laboratory                                                                               | Jade Wang, et al.                                                                                                                                                                                                                                                                                                                                                                                                                                                                                                                                                                                                                                                                                                                                 |
| EPI_ISL_1447108, EPI_ISL_1447110                                                                                                                                                                                                                                                                                                                                                                                                                                                                                                                                                                                                                                                                                                                                                                                              | DOHMH Morrisania                                                         | New York City Public Health Laboratory                                                                               | Jade Wang, et al.                                                                                                                                                                                                                                                                                                                                                                                                                                                                                                                                                                                                                                                                                                                                 |
| EPI_ISL_1447145                                                                                                                                                                                                                                                                                                                                                                                                                                                                                                                                                                                                                                                                                                                                                                                                               | DOHMH PHL                                                                | New York City Public Health Laboratory                                                                               | Jade Wang, et al.                                                                                                                                                                                                                                                                                                                                                                                                                                                                                                                                                                                                                                                                                                                                 |
| EPI_ISL_1447146                                                                                                                                                                                                                                                                                                                                                                                                                                                                                                                                                                                                                                                                                                                                                                                                               | DOHMH Jamaica                                                            | New York City Public Health Laboratory                                                                               | Jade Wang, et al.                                                                                                                                                                                                                                                                                                                                                                                                                                                                                                                                                                                                                                                                                                                                 |
| EPI_ISL_1447148                                                                                                                                                                                                                                                                                                                                                                                                                                                                                                                                                                                                                                                                                                                                                                                                               | DOHMH Crown Heights                                                      | New York City Public Health Laboratory                                                                               | Jade Wang, et al.                                                                                                                                                                                                                                                                                                                                                                                                                                                                                                                                                                                                                                                                                                                                 |
| EPI_ISL_1447149, EPI_ISL_1447150                                                                                                                                                                                                                                                                                                                                                                                                                                                                                                                                                                                                                                                                                                                                                                                              | DOHMH PHL                                                                | New York City Public Health Laboratory                                                                               | Jade Wang, et al.                                                                                                                                                                                                                                                                                                                                                                                                                                                                                                                                                                                                                                                                                                                                 |
| EPI_ISL_1447152, EPI_ISL_1447159                                                                                                                                                                                                                                                                                                                                                                                                                                                                                                                                                                                                                                                                                                                                                                                              | DOHMH Jamaica                                                            | New York City Public Health Laboratory                                                                               | Jade Wang, et al.                                                                                                                                                                                                                                                                                                                                                                                                                                                                                                                                                                                                                                                                                                                                 |
| EPI_ISL_1447160                                                                                                                                                                                                                                                                                                                                                                                                                                                                                                                                                                                                                                                                                                                                                                                                               | DOHMH Corona                                                             | New York City Public Health Laboratory                                                                               | Jade Wang, et al.                                                                                                                                                                                                                                                                                                                                                                                                                                                                                                                                                                                                                                                                                                                                 |
| EPI_ISL_1447163, EPI_ISL_1447164                                                                                                                                                                                                                                                                                                                                                                                                                                                                                                                                                                                                                                                                                                                                                                                              | DOHMH Jamaica                                                            | New York City Public Health Laboratory                                                                               | Jade Wang, et al.                                                                                                                                                                                                                                                                                                                                                                                                                                                                                                                                                                                                                                                                                                                                 |
| EPI_ISL_1447165, EPI_ISL_1447171                                                                                                                                                                                                                                                                                                                                                                                                                                                                                                                                                                                                                                                                                                                                                                                              | DOHMH Corona                                                             | New York City Public Health Laboratory                                                                               | Jade Wang, et al.                                                                                                                                                                                                                                                                                                                                                                                                                                                                                                                                                                                                                                                                                                                                 |
| EPI_ISL_1447173                                                                                                                                                                                                                                                                                                                                                                                                                                                                                                                                                                                                                                                                                                                                                                                                               | DOHMH Riverside                                                          | New York City Public Health Laboratory                                                                               | Jade Wang, et al.                                                                                                                                                                                                                                                                                                                                                                                                                                                                                                                                                                                                                                                                                                                                 |
| EPI_ISL_1447176                                                                                                                                                                                                                                                                                                                                                                                                                                                                                                                                                                                                                                                                                                                                                                                                               | DOHMH Fort Greene                                                        | New York City Public Health Laboratory                                                                               | Jade Wang, et al.                                                                                                                                                                                                                                                                                                                                                                                                                                                                                                                                                                                                                                                                                                                                 |
| EPI_ISL_1447177                                                                                                                                                                                                                                                                                                                                                                                                                                                                                                                                                                                                                                                                                                                                                                                                               | OCME Office Of Chief Medical Examiner                                    | New York City Public Health Laboratory                                                                               | Jade Wang, et al.                                                                                                                                                                                                                                                                                                                                                                                                                                                                                                                                                                                                                                                                                                                                 |
| EPI_ISL_1447179                                                                                                                                                                                                                                                                                                                                                                                                                                                                                                                                                                                                                                                                                                                                                                                                               | DOHMH Jamaica                                                            | New York City Public Health Laboratory                                                                               | Jade Wang, et al.                                                                                                                                                                                                                                                                                                                                                                                                                                                                                                                                                                                                                                                                                                                                 |
| EPI_ISL_1447181                                                                                                                                                                                                                                                                                                                                                                                                                                                                                                                                                                                                                                                                                                                                                                                                               | DOHMH Morrisania                                                         | New York City Public Health Laboratory                                                                               | Jade Wang, et al.                                                                                                                                                                                                                                                                                                                                                                                                                                                                                                                                                                                                                                                                                                                                 |
| EPI_ISL_1447291                                                                                                                                                                                                                                                                                                                                                                                                                                                                                                                                                                                                                                                                                                                                                                                                               | South Eastern Area Laboratory Services (SEALS)                           | NSW Health Pathology - Institute of Clinical Pathology and Medical Research; Westmead Hospital; University of Sydney | CIDM-PH et al.                                                                                                                                                                                                                                                                                                                                                                                                                                                                                                                                                                                                                                                                                                                                    |
| EPI_ISL_1447510, EPI_ISL_1447512, EPI_ISL_1447514, EPI_ISL_1447520, EPI_ISL_1447531, EPI_ISL_1447532, EPI_ISL_1447534, EPI_ISL_1447536, EPI_ISL_1447542, EPI_ISL_1447546, EPI_ISL_1447549, EPI_ISL_1447551, EPI_ISL_1447552, EPI_ISL_1447554, EPI_ISL_1447556, EPI_ISL_1447558, EPI_ISL_1447562, EPI_ISL_1447563, EPI_ISL_1447566, EPI_ISL_1447571, EPI_ISL_1447576, EPI_ISL_1447578, EPI_ISL_1447582, EPI_ISL_1447592, EPI_ISL_1447597, EPI_ISL_1447598, EPI_ISL_1447599, EPI_ISL_1447600, EPI_ISL_1447601, EPI_ISL_1447602, EPI_ISL_1447605, EPI_ISL_1447607, EPI_ISL_1447608, EPI_ISL_1447609, EPI_ISL_1447610, EPI_ISL_1447615, EPI_ISL_1447621, EPI_ISL_1447622, EPI_ISL_1447625, EPI_ISL_1447645, EPI_ISL_1447650, EPI_ISL_1447653, EPI_ISL_1447654, EPI_ISL_1447655, EPI_ISL_1447658, EPI_ISL_1447665, EPI_ISL_1447667 |                                                                          |                                                                                                                      |                                                                                                                                                                                                                                                                                                                                                                                                                                                                                                                                                                                                                                                                                                                                                   |
| see above                                                                                                                                                                                                                                                                                                                                                                                                                                                                                                                                                                                                                                                                                                                                                                                                                     | Yale Clinical Virology Lab                                               | Grubaugh Lab - Yale School of Public Health                                                                          | Joseph Fauver, Mallery Breban, Isabel Ott, Tara Alpert, Mary Petrone, Anderson Brito, Chantal Vogels, Annie Watkins, Chaney Kalinich, Jessica Rothman, Marie L. Landry, Nathan Grubaugh                                                                                                                                                                                                                                                                                                                                                                                                                                                                                                                                                           |
| EPI_ISL_1448609                                                                                                                                                                                                                                                                                                                                                                                                                                                                                                                                                                                                                                                                                                                                                                                                               | University Hospitals of Geneva, Laboratory of Virology                   | HUG, Laboratory of Virology and the Health2030 Genome Center                                                         | Samuel Cordey, Ana Rita Goncalves, Laurent Kaiser, Lorenzo Cerutti, Henri Pegeot, Melyssa Elies, Deborah Penet, Keith Harshman, Ioannis Xenarios, Emmanouil Dermitzakis                                                                                                                                                                                                                                                                                                                                                                                                                                                                                                                                                                           |
| EPI_ISL_1461303                                                                                                                                                                                                                                                                                                                                                                                                                                                                                                                                                                                                                                                                                                                                                                                                               | URMC LABS                                                                | Wadsworth Center, New York State Department of Health                                                                | Kirsten St. George, Daryl M. Lamson, Alexis Russell, Matthew Shudt, Melissa A Leisner, Jonathan Plitnick, Catharine Prussing, Navjot Singh, John Kelly, Erasmus Schneider, Erica Lasek-Nesselquist                                                                                                                                                                                                                                                                                                                                                                                                                                                                                                                                                |
| EPI_ISL_1461316                                                                                                                                                                                                                                                                                                                                                                                                                                                                                                                                                                                                                                                                                                                                                                                                               | SUNY UPSTATE MEDICAL UNIVERSITY                                          | Wadsworth Center, New York State Department of Health                                                                | Kirsten St. George, Daryl M. Lamson, Alexis Russell, Matthew Shudt, Melissa A Leisner, Jonathan Plitnick, Catharine Prussing, Navjot Singh, John Kelly, Erasmus Schneider, Erica Lasek-Nesselquist                                                                                                                                                                                                                                                                                                                                                                                                                                                                                                                                                |
| EPI_ISL_1461323, EPI_ISL_1461327, EPI_ISL_1461342, EPI_ISL_1461344, EPI_ISL_1461347, EPI_ISL_1461352                                                                                                                                                                                                                                                                                                                                                                                                                                                                                                                                                                                                                                                                                                                          | NYC Pandemic Response Lab                                                | Wadsworth Center, New York State Department of Health                                                                | Kirsten St. George, Daryl M. Lamson, Alexis Russell, Matthew Shudt, Melissa A Leisner, Jonathan Plitnick, Catharine Prussing, Navjot Singh, John Kelly, Erasmus Schneider, Erica Lasek-Nesselquist                                                                                                                                                                                                                                                                                                                                                                                                                                                                                                                                                |
| EPI_ISL_1461359, EPI_ISL_1461360, EPI_ISL_1461374                                                                                                                                                                                                                                                                                                                                                                                                                                                                                                                                                                                                                                                                                                                                                                             | TEMPUS LABS INC                                                          | Wadsworth Center, New York State Department of Health                                                                | Kirsten St. George, Daryl M. Lamson, Alexis Russell, Matthew Shudt, Melissa A Leisner, Jonathan Plitnick, Catharine Prussing, Navjot Singh, John Kelly, Erasmus Schneider, Erica Lasek-Nesselquist                                                                                                                                                                                                                                                                                                                                                                                                                                                                                                                                                |
| EPI_ISL_1461505                                                                                                                                                                                                                                                                                                                                                                                                                                                                                                                                                                                                                                                                                                                                                                                                               | Michigan Department of Health and Human Services, Bureau of Laboratories | Michigan Department of Health and Human Services, Bureau of Laboratories                                             | Blankenship HM, Riner D, Soehnlén MK                                                                                                                                                                                                                                                                                                                                                                                                                                                                                                                                                                                                                                                                                                              |
| EPI_ISL_1462512                                                                                                                                                                                                                                                                                                                                                                                                                                                                                                                                                                                                                                                                                                                                                                                                               | URMC LABS                                                                | Wadsworth Center, New York State Department of Health                                                                | Kirsten St. George, Daryl M. Lamson, Alexis Russell, Matthew Shudt, Melissa A Leisner, Jonathan Plitnick, Catharine Prussing, Navjot Singh, John Kelly, Erasmus Schneider, Erica Lasek-Nesselquist                                                                                                                                                                                                                                                                                                                                                                                                                                                                                                                                                |
| EPI_ISL_1462542                                                                                                                                                                                                                                                                                                                                                                                                                                                                                                                                                                                                                                                                                                                                                                                                               | SUNY UPSTATE MEDICAL UNIVERSITY                                          | Wadsworth Center, New York State Department of Health                                                                | Kirsten St. George, Daryl M. Lamson, Alexis Russell, Matthew Shudt, Melissa A Leisner, Jonathan Plitnick, Catharine Prussing, Navjot Singh, John Kelly, Erasmus Schneider, Erica Lasek-Nesselquist                                                                                                                                                                                                                                                                                                                                                                                                                                                                                                                                                |
| EPI_ISL_1462551                                                                                                                                                                                                                                                                                                                                                                                                                                                                                                                                                                                                                                                                                                                                                                                                               | MONTEFIORE MEDICAL CENTER LABORATORIES                                   | Wadsworth Center, New York State Department of Health                                                                | Kirsten St. George, Daryl M. Lamson, Alexis Russell, Matthew Shudt, Melissa A Leisner, Jonathan Plitnick, Catharine Prussing, Navjot Singh, John Kelly, Erasmus Schneider, Erica Lasek-Nesselquist                                                                                                                                                                                                                                                                                                                                                                                                                                                                                                                                                |
| EPI_ISL_1462576, EPI_ISL_1462579                                                                                                                                                                                                                                                                                                                                                                                                                                                                                                                                                                                                                                                                                                                                                                                              | NORTHWELL HEALTH LABORATORIES                                            | Wadsworth Center, New York State Department of Health                                                                | Kirsten St. George, Daryl M. Lamson, Alexis Russell, Matthew Shudt, Melissa A Leisner, Jonathan Plitnick, Catharine Prussing, Navjot Singh, John Kelly, Erasmus Schneider, Erica Lasek-Nesselquist                                                                                                                                                                                                                                                                                                                                                                                                                                                                                                                                                |
| EPI_ISL_1462583                                                                                                                                                                                                                                                                                                                                                                                                                                                                                                                                                                                                                                                                                                                                                                                                               | Laboratory Corporation of America                                        | Centers for Disease Control and Prevention Division of Viral Diseases, Pathogen Discovery                            | Dakota Howard, Dhvani Batra, Peter W. Cook, Kara Moser, Adrian Paskkey, Jason Caravas, Benjamin Rambo-Martin, Shatavia Morrison, Christopher Gulvick, Scott Sammons, Yvette Unoarumhi, Darlene Wagner, Matthew Schmerer, Mino Agarwal, Eyad Almasri, Debbie Boles, Ayla Burns, Nuthawin Charoensri, Oren Cohen, Susan Countryman, Mary Ann Cristobal, Bobbi Croy, Suzanne Dale, Hrushikesh Deshmukh, Amanda Douglas, Vincent Drouillon, Marcia Eisenberg, Howard Engler, Rama Ghatti, Prashant Gupta, Susan Hicks, Jake Humphrey, Lax Iyer, Manoj Jain, Mohan Kolli, Brian Krueger, Tim Kuphal, Stanley Letovsky, Michael Levandoski, Craig Lukasik, Jonathan Meltzer, Brian Norvell, Mindy Nye, Scott Parker, Christos Petropoulos, John Pruitt, |

|                                                                                                                                                                                                                                                                                                                                                                                                                                                                                                                                                                                                                                                                                                                                                                                                                                                                                                                                                                                                                                                                                                                                                                                                                                                                                                                                                                                                                                                                                                                                                                                                                                                                                                                                                                                                                                                                                                                                                                                                                                                                                                                                                                                                                                                                                                                                                                                                                                                                                                                                                                                                                                                                                                                                                                                                                                                                                                                                                                                                                                                                                                                                                                                                                                                                                                                                                                                                                                                                                                                                                                                                                                                                                                                                                                                                                                                                                                                                                                                                                                                                                                                                                                                                                                                                                                                                                                                                                                                                                                               |                                                 |                                                                                           |                                                                                                                                                                                                                                                                                                                                                                                                                                                                                                                                                                                                                                                                                                                                                                                                                                                                                                                                                                                                                                               |                                                          |
|---------------------------------------------------------------------------------------------------------------------------------------------------------------------------------------------------------------------------------------------------------------------------------------------------------------------------------------------------------------------------------------------------------------------------------------------------------------------------------------------------------------------------------------------------------------------------------------------------------------------------------------------------------------------------------------------------------------------------------------------------------------------------------------------------------------------------------------------------------------------------------------------------------------------------------------------------------------------------------------------------------------------------------------------------------------------------------------------------------------------------------------------------------------------------------------------------------------------------------------------------------------------------------------------------------------------------------------------------------------------------------------------------------------------------------------------------------------------------------------------------------------------------------------------------------------------------------------------------------------------------------------------------------------------------------------------------------------------------------------------------------------------------------------------------------------------------------------------------------------------------------------------------------------------------------------------------------------------------------------------------------------------------------------------------------------------------------------------------------------------------------------------------------------------------------------------------------------------------------------------------------------------------------------------------------------------------------------------------------------------------------------------------------------------------------------------------------------------------------------------------------------------------------------------------------------------------------------------------------------------------------------------------------------------------------------------------------------------------------------------------------------------------------------------------------------------------------------------------------------------------------------------------------------------------------------------------------------------------------------------------------------------------------------------------------------------------------------------------------------------------------------------------------------------------------------------------------------------------------------------------------------------------------------------------------------------------------------------------------------------------------------------------------------------------------------------------------------------------------------------------------------------------------------------------------------------------------------------------------------------------------------------------------------------------------------------------------------------------------------------------------------------------------------------------------------------------------------------------------------------------------------------------------------------------------------------------------------------------------------------------------------------------------------------------------------------------------------------------------------------------------------------------------------------------------------------------------------------------------------------------------------------------------------------------------------------------------------------------------------------------------------------------------------------------------------------------------------------------------------------------------------|-------------------------------------------------|-------------------------------------------------------------------------------------------|-----------------------------------------------------------------------------------------------------------------------------------------------------------------------------------------------------------------------------------------------------------------------------------------------------------------------------------------------------------------------------------------------------------------------------------------------------------------------------------------------------------------------------------------------------------------------------------------------------------------------------------------------------------------------------------------------------------------------------------------------------------------------------------------------------------------------------------------------------------------------------------------------------------------------------------------------------------------------------------------------------------------------------------------------|----------------------------------------------------------|
| EPI_ISL_1462589, EPI_ISL_1462594, EPI_ISL_1462599, EPI_ISL_1462604, EPI_ISL_1462609, EPI_ISL_1462618, EPI_ISL_1462620                                                                                                                                                                                                                                                                                                                                                                                                                                                                                                                                                                                                                                                                                                                                                                                                                                                                                                                                                                                                                                                                                                                                                                                                                                                                                                                                                                                                                                                                                                                                                                                                                                                                                                                                                                                                                                                                                                                                                                                                                                                                                                                                                                                                                                                                                                                                                                                                                                                                                                                                                                                                                                                                                                                                                                                                                                                                                                                                                                                                                                                                                                                                                                                                                                                                                                                                                                                                                                                                                                                                                                                                                                                                                                                                                                                                                                                                                                                                                                                                                                                                                                                                                                                                                                                                                                                                                                                         | NORTHWELL HEALTH LABORATORIES                   | Wadsworth Center, New York State Department of Health                                     | Steven Ragan, Scott Ryan, Mike Sapeta, Jana Schroth, Suresh Babu Selvaraju, Goran Stevovic, Amanda Suchanek, Andrea Throop, Lyndon Tilson, Thomas Urban, Joe Vosshell, Kimberly Wagner, Jonathan Williams, Mary Williamson, Qian Zeng, Tricia Zwielfelhofer, Ciinton R. Paden, Duncan MacCannell                                                                                                                                                                                                                                                                                                                                                                                                                                                                                                                                                                                                                                                                                                                                              |                                                          |
| EPI_ISL_1462838, EPI_ISL_1463087, EPI_ISL_1463100, EPI_ISL_1463112, EPI_ISL_1463118, EPI_ISL_1463119, EPI_ISL_1463187, EPI_ISL_1463208, EPI_ISL_1463318, EPI_ISL_1463321, EPI_ISL_1463400                                                                                                                                                                                                                                                                                                                                                                                                                                                                                                                                                                                                                                                                                                                                                                                                                                                                                                                                                                                                                                                                                                                                                                                                                                                                                                                                                                                                                                                                                                                                                                                                                                                                                                                                                                                                                                                                                                                                                                                                                                                                                                                                                                                                                                                                                                                                                                                                                                                                                                                                                                                                                                                                                                                                                                                                                                                                                                                                                                                                                                                                                                                                                                                                                                                                                                                                                                                                                                                                                                                                                                                                                                                                                                                                                                                                                                                                                                                                                                                                                                                                                                                                                                                                                                                                                                                     | see above                                       | Laboratory Corporation of America                                                         | Centers for Disease Control and Prevention Division of Viral Diseases, Pathogen Discovery                                                                                                                                                                                                                                                                                                                                                                                                                                                                                                                                                                                                                                                                                                                                                                                                                                                                                                                                                     |                                                          |
| EPI_ISL_1464568                                                                                                                                                                                                                                                                                                                                                                                                                                                                                                                                                                                                                                                                                                                                                                                                                                                                                                                                                                                                                                                                                                                                                                                                                                                                                                                                                                                                                                                                                                                                                                                                                                                                                                                                                                                                                                                                                                                                                                                                                                                                                                                                                                                                                                                                                                                                                                                                                                                                                                                                                                                                                                                                                                                                                                                                                                                                                                                                                                                                                                                                                                                                                                                                                                                                                                                                                                                                                                                                                                                                                                                                                                                                                                                                                                                                                                                                                                                                                                                                                                                                                                                                                                                                                                                                                                                                                                                                                                                                                               | Labor Dr. Fenner und Kollegen                   | Heinrich Pette Institute, Leibniz Institute for Experimental Virology                     | Dakota Howard, Dhvani Batra, Peter W. Cook, Kara Moser, Adrian Paskey, Jason Caravas, Benjamin Rambo-Martin, Shatavia Morrison, Christopher Gulvick, Scott Sammons, Yvette Unoarumhi, Darlene Wagner, Matthew Schmeier, Minoq Agarwal, Eyad Almasri, Debbie Boles, Ayla Burns, Nuthwin Charoensri, Oren Cohen, Susan Countryman, Mary Ann Cristobal, Bobbi Croy, Suzanne Dale, Hrushikesh Deshmukh, Amanda Douglas, Vincent Drouillon, Marcia Eisenberg, Howard Engler, Rama Ghatti, Prashant Gupta, Susan Hicks, Jake Humphrey, Lax Iyer, Manoj Jain, Mohan Koli, Brian Krueger, Tim Kuphal, Stanley Letovsky, Michael Levandoski, Craig Lukasik, Jonathan Meitzer, Jake Novelli, Mandy Nye, Scott Parker, Chohan Petropoulos, John Pruitt, Steven Ragan, Scott Ryan, Mike Sapeta, Jana Schroth, Suresh Babu Selvaraju, Goran Stevovic, Amanda Suchanek, Andrea Throop, Lyndon Tilson, Thomas Urban, Joe Vosshell, Kimberly Wagner, Jonathan Williams, Mary Williamson, Qian Zeng, Tricia Zwielfelhofer, Ciinton R. Paden, Duncan MacCannell |                                                          |
| EPI_ISL_1465000                                                                                                                                                                                                                                                                                                                                                                                                                                                                                                                                                                                                                                                                                                                                                                                                                                                                                                                                                                                                                                                                                                                                                                                                                                                                                                                                                                                                                                                                                                                                                                                                                                                                                                                                                                                                                                                                                                                                                                                                                                                                                                                                                                                                                                                                                                                                                                                                                                                                                                                                                                                                                                                                                                                                                                                                                                                                                                                                                                                                                                                                                                                                                                                                                                                                                                                                                                                                                                                                                                                                                                                                                                                                                                                                                                                                                                                                                                                                                                                                                                                                                                                                                                                                                                                                                                                                                                                                                                                                                               | Sonora Quest Laboratories                       | TGen North                                                                                | *Jolene Bowers, Heather Centner, Chris French, Hayley Yaglom, Ashlyn Pfeiffer, Darrin Lemmer, Dave Engenthaler, The Arizona COVID Genomics Union (ACGU)*                                                                                                                                                                                                                                                                                                                                                                                                                                                                                                                                                                                                                                                                                                                                                                                                                                                                                      |                                                          |
| EPI_ISL_1465635                                                                                                                                                                                                                                                                                                                                                                                                                                                                                                                                                                                                                                                                                                                                                                                                                                                                                                                                                                                                                                                                                                                                                                                                                                                                                                                                                                                                                                                                                                                                                                                                                                                                                                                                                                                                                                                                                                                                                                                                                                                                                                                                                                                                                                                                                                                                                                                                                                                                                                                                                                                                                                                                                                                                                                                                                                                                                                                                                                                                                                                                                                                                                                                                                                                                                                                                                                                                                                                                                                                                                                                                                                                                                                                                                                                                                                                                                                                                                                                                                                                                                                                                                                                                                                                                                                                                                                                                                                                                                               | ALBANY MEDICAL CENTER                           | Wadsworth Center, New York State Department of Health                                     | Kirsten St. George, Daryl M. Lamson, Alexis Russell, Matthew Shudt, Melissa A Leisner, Jonathan Pitnick, Catharine Prussing, Navjot Singh, John Kelly, Erasmus Schneider, Erica Lasek-Nesselquist                                                                                                                                                                                                                                                                                                                                                                                                                                                                                                                                                                                                                                                                                                                                                                                                                                             |                                                          |
| EPI_ISL_1465668, EPI_ISL_1465671                                                                                                                                                                                                                                                                                                                                                                                                                                                                                                                                                                                                                                                                                                                                                                                                                                                                                                                                                                                                                                                                                                                                                                                                                                                                                                                                                                                                                                                                                                                                                                                                                                                                                                                                                                                                                                                                                                                                                                                                                                                                                                                                                                                                                                                                                                                                                                                                                                                                                                                                                                                                                                                                                                                                                                                                                                                                                                                                                                                                                                                                                                                                                                                                                                                                                                                                                                                                                                                                                                                                                                                                                                                                                                                                                                                                                                                                                                                                                                                                                                                                                                                                                                                                                                                                                                                                                                                                                                                                              | MONTEFIORE MEDICAL CENTER LABORATORIES          | Wadsworth Center, New York State Department of Health                                     | Kirsten St. George, Daryl M. Lamson, Alexis Russell, Matthew Shudt, Melissa A Leisner, Jonathan Pitnick, Catharine Prussing, Navjot Singh, John Kelly, Erasmus Schneider, Erica Lasek-Nesselquist                                                                                                                                                                                                                                                                                                                                                                                                                                                                                                                                                                                                                                                                                                                                                                                                                                             |                                                          |
| EPI_ISL_1465692                                                                                                                                                                                                                                                                                                                                                                                                                                                                                                                                                                                                                                                                                                                                                                                                                                                                                                                                                                                                                                                                                                                                                                                                                                                                                                                                                                                                                                                                                                                                                                                                                                                                                                                                                                                                                                                                                                                                                                                                                                                                                                                                                                                                                                                                                                                                                                                                                                                                                                                                                                                                                                                                                                                                                                                                                                                                                                                                                                                                                                                                                                                                                                                                                                                                                                                                                                                                                                                                                                                                                                                                                                                                                                                                                                                                                                                                                                                                                                                                                                                                                                                                                                                                                                                                                                                                                                                                                                                                                               | SUNY UPSTATE MEDICAL UNIVERSITY                 | Wadsworth Center, New York State Department of Health                                     | Kirsten St. George, Daryl M. Lamson, Alexis Russell, Matthew Shudt, Melissa A Leisner, Jonathan Pitnick, Catharine Prussing, Navjot Singh, John Kelly, Erasmus Schneider, Erica Lasek-Nesselquist                                                                                                                                                                                                                                                                                                                                                                                                                                                                                                                                                                                                                                                                                                                                                                                                                                             |                                                          |
| EPI_ISL_1465701, EPI_ISL_1465706, EPI_ISL_1465709, EPI_ISL_1465710                                                                                                                                                                                                                                                                                                                                                                                                                                                                                                                                                                                                                                                                                                                                                                                                                                                                                                                                                                                                                                                                                                                                                                                                                                                                                                                                                                                                                                                                                                                                                                                                                                                                                                                                                                                                                                                                                                                                                                                                                                                                                                                                                                                                                                                                                                                                                                                                                                                                                                                                                                                                                                                                                                                                                                                                                                                                                                                                                                                                                                                                                                                                                                                                                                                                                                                                                                                                                                                                                                                                                                                                                                                                                                                                                                                                                                                                                                                                                                                                                                                                                                                                                                                                                                                                                                                                                                                                                                            | MONTEFIORE MEDICAL CENTER LABORATORIES          | Wadsworth Center, New York State Department of Health                                     | Kirsten St. George, Daryl M. Lamson, Alexis Russell, Matthew Shudt, Melissa A Leisner, Jonathan Pitnick, Catharine Prussing, Navjot Singh, John Kelly, Erasmus Schneider, Erica Lasek-Nesselquist                                                                                                                                                                                                                                                                                                                                                                                                                                                                                                                                                                                                                                                                                                                                                                                                                                             |                                                          |
| EPI_ISL_1465722                                                                                                                                                                                                                                                                                                                                                                                                                                                                                                                                                                                                                                                                                                                                                                                                                                                                                                                                                                                                                                                                                                                                                                                                                                                                                                                                                                                                                                                                                                                                                                                                                                                                                                                                                                                                                                                                                                                                                                                                                                                                                                                                                                                                                                                                                                                                                                                                                                                                                                                                                                                                                                                                                                                                                                                                                                                                                                                                                                                                                                                                                                                                                                                                                                                                                                                                                                                                                                                                                                                                                                                                                                                                                                                                                                                                                                                                                                                                                                                                                                                                                                                                                                                                                                                                                                                                                                                                                                                                                               | NYC Pandemic Response Lab                       | Wadsworth Center, New York State Department of Health                                     | Kirsten St. George, Daryl M. Lamson, Alexis Russell, Matthew Shudt, Melissa A Leisner, Jonathan Pitnick, Catharine Prussing, Navjot Singh, John Kelly, Erasmus Schneider, Erica Lasek-Nesselquist                                                                                                                                                                                                                                                                                                                                                                                                                                                                                                                                                                                                                                                                                                                                                                                                                                             |                                                          |
| EPI_ISL_1465737                                                                                                                                                                                                                                                                                                                                                                                                                                                                                                                                                                                                                                                                                                                                                                                                                                                                                                                                                                                                                                                                                                                                                                                                                                                                                                                                                                                                                                                                                                                                                                                                                                                                                                                                                                                                                                                                                                                                                                                                                                                                                                                                                                                                                                                                                                                                                                                                                                                                                                                                                                                                                                                                                                                                                                                                                                                                                                                                                                                                                                                                                                                                                                                                                                                                                                                                                                                                                                                                                                                                                                                                                                                                                                                                                                                                                                                                                                                                                                                                                                                                                                                                                                                                                                                                                                                                                                                                                                                                                               | URMC LABS                                       | Wadsworth Center, New York State Department of Health                                     | Kirsten St. George, Daryl M. Lamson, Alexis Russell, Matthew Shudt, Melissa A Leisner, Jonathan Pitnick, Catharine Prussing, Navjot Singh, John Kelly, Erasmus Schneider, Erica Lasek-Nesselquist                                                                                                                                                                                                                                                                                                                                                                                                                                                                                                                                                                                                                                                                                                                                                                                                                                             |                                                          |
| EPI_ISL_1465761, EPI_ISL_1465762                                                                                                                                                                                                                                                                                                                                                                                                                                                                                                                                                                                                                                                                                                                                                                                                                                                                                                                                                                                                                                                                                                                                                                                                                                                                                                                                                                                                                                                                                                                                                                                                                                                                                                                                                                                                                                                                                                                                                                                                                                                                                                                                                                                                                                                                                                                                                                                                                                                                                                                                                                                                                                                                                                                                                                                                                                                                                                                                                                                                                                                                                                                                                                                                                                                                                                                                                                                                                                                                                                                                                                                                                                                                                                                                                                                                                                                                                                                                                                                                                                                                                                                                                                                                                                                                                                                                                                                                                                                                              | NORTHWELL HEALTH LABORATORIES                   | Wadsworth Center, New York State Department of Health                                     | Kirsten St. George, Daryl M. Lamson, Alexis Russell, Matthew Shudt, Melissa A Leisner, Jonathan Pitnick, Catharine Prussing, Navjot Singh, John Kelly, Erasmus Schneider, Erica Lasek-Nesselquist                                                                                                                                                                                                                                                                                                                                                                                                                                                                                                                                                                                                                                                                                                                                                                                                                                             |                                                          |
| EPI_ISL_1465797, EPI_ISL_1465798                                                                                                                                                                                                                                                                                                                                                                                                                                                                                                                                                                                                                                                                                                                                                                                                                                                                                                                                                                                                                                                                                                                                                                                                                                                                                                                                                                                                                                                                                                                                                                                                                                                                                                                                                                                                                                                                                                                                                                                                                                                                                                                                                                                                                                                                                                                                                                                                                                                                                                                                                                                                                                                                                                                                                                                                                                                                                                                                                                                                                                                                                                                                                                                                                                                                                                                                                                                                                                                                                                                                                                                                                                                                                                                                                                                                                                                                                                                                                                                                                                                                                                                                                                                                                                                                                                                                                                                                                                                                              | MONTEFIORE MEDICAL CENTER LABORATORIES          | Wadsworth Center, New York State Department of Health                                     | Kirsten St. George, Daryl M. Lamson, Alexis Russell, Matthew Shudt, Melissa A Leisner, Jonathan Pitnick, Catharine Prussing, Navjot Singh, John Kelly, Erasmus Schneider, Erica Lasek-Nesselquist                                                                                                                                                                                                                                                                                                                                                                                                                                                                                                                                                                                                                                                                                                                                                                                                                                             |                                                          |
| EPI_ISL_1465807, EPI_ISL_1465809, EPI_ISL_1465810, EPI_ISL_1465811, EPI_ISL_1465819, EPI_ISL_1465827, EPI_ISL_1465828, EPI_ISL_1465831                                                                                                                                                                                                                                                                                                                                                                                                                                                                                                                                                                                                                                                                                                                                                                                                                                                                                                                                                                                                                                                                                                                                                                                                                                                                                                                                                                                                                                                                                                                                                                                                                                                                                                                                                                                                                                                                                                                                                                                                                                                                                                                                                                                                                                                                                                                                                                                                                                                                                                                                                                                                                                                                                                                                                                                                                                                                                                                                                                                                                                                                                                                                                                                                                                                                                                                                                                                                                                                                                                                                                                                                                                                                                                                                                                                                                                                                                                                                                                                                                                                                                                                                                                                                                                                                                                                                                                        | NYC Pandemic Response Lab                       | Wadsworth Center, New York State Department of Health                                     | Kirsten St. George, Daryl M. Lamson, Alexis Russell, Matthew Shudt, Melissa A Leisner, Jonathan Pitnick, Catharine Prussing, Navjot Singh, John Kelly, Erasmus Schneider, Erica Lasek-Nesselquist                                                                                                                                                                                                                                                                                                                                                                                                                                                                                                                                                                                                                                                                                                                                                                                                                                             |                                                          |
| EPI_ISL_1465838, EPI_ISL_1465840, EPI_ISL_1465842                                                                                                                                                                                                                                                                                                                                                                                                                                                                                                                                                                                                                                                                                                                                                                                                                                                                                                                                                                                                                                                                                                                                                                                                                                                                                                                                                                                                                                                                                                                                                                                                                                                                                                                                                                                                                                                                                                                                                                                                                                                                                                                                                                                                                                                                                                                                                                                                                                                                                                                                                                                                                                                                                                                                                                                                                                                                                                                                                                                                                                                                                                                                                                                                                                                                                                                                                                                                                                                                                                                                                                                                                                                                                                                                                                                                                                                                                                                                                                                                                                                                                                                                                                                                                                                                                                                                                                                                                                                             | STONY BROOK UNIVERSITY HOSPITAL                 | Wadsworth Center, New York State Department of Health                                     | Kirsten St. George, Daryl M. Lamson, Alexis Russell, Matthew Shudt, Melissa A Leisner, Jonathan Pitnick, Catharine Prussing, Navjot Singh, John Kelly, Erasmus Schneider, Erica Lasek-Nesselquist                                                                                                                                                                                                                                                                                                                                                                                                                                                                                                                                                                                                                                                                                                                                                                                                                                             |                                                          |
| EPI_ISL_1465853                                                                                                                                                                                                                                                                                                                                                                                                                                                                                                                                                                                                                                                                                                                                                                                                                                                                                                                                                                                                                                                                                                                                                                                                                                                                                                                                                                                                                                                                                                                                                                                                                                                                                                                                                                                                                                                                                                                                                                                                                                                                                                                                                                                                                                                                                                                                                                                                                                                                                                                                                                                                                                                                                                                                                                                                                                                                                                                                                                                                                                                                                                                                                                                                                                                                                                                                                                                                                                                                                                                                                                                                                                                                                                                                                                                                                                                                                                                                                                                                                                                                                                                                                                                                                                                                                                                                                                                                                                                                                               | GLENS FALLS HOSPITAL LABORATORY                 | Wadsworth Center, New York State Department of Health                                     | Kirsten St. George, Daryl M. Lamson, Alexis Russell, Matthew Shudt, Melissa A Leisner, Jonathan Pitnick, Catharine Prussing, Navjot Singh, John Kelly, Erasmus Schneider, Erica Lasek-Nesselquist                                                                                                                                                                                                                                                                                                                                                                                                                                                                                                                                                                                                                                                                                                                                                                                                                                             |                                                          |
| EPI_ISL_1465860, EPI_ISL_1465862, EPI_ISL_1465871, EPI_ISL_1465873, EPI_ISL_1465878                                                                                                                                                                                                                                                                                                                                                                                                                                                                                                                                                                                                                                                                                                                                                                                                                                                                                                                                                                                                                                                                                                                                                                                                                                                                                                                                                                                                                                                                                                                                                                                                                                                                                                                                                                                                                                                                                                                                                                                                                                                                                                                                                                                                                                                                                                                                                                                                                                                                                                                                                                                                                                                                                                                                                                                                                                                                                                                                                                                                                                                                                                                                                                                                                                                                                                                                                                                                                                                                                                                                                                                                                                                                                                                                                                                                                                                                                                                                                                                                                                                                                                                                                                                                                                                                                                                                                                                                                           | TEMPUS LABS INC                                 | Wadsworth Center, New York State Department of Health                                     | Kirsten St. George, Daryl M. Lamson, Alexis Russell, Matthew Shudt, Melissa A Leisner, Jonathan Pitnick, Catharine Prussing, Navjot Singh, John Kelly, Erasmus Schneider, Erica Lasek-Nesselquist                                                                                                                                                                                                                                                                                                                                                                                                                                                                                                                                                                                                                                                                                                                                                                                                                                             |                                                          |
| EPI_ISL_1470560, EPI_ISL_1470561, EPI_ISL_1470563, EPI_ISL_1470564, EPI_ISL_1470567, EPI_ISL_1470569, EPI_ISL_1470570, EPI_ISL_1470575, EPI_ISL_1470583, EPI_ISL_1470585, EPI_ISL_1470587, EPI_ISL_1470588, EPI_ISL_1470591, EPI_ISL_1470597, EPI_ISL_1470599, EPI_ISL_1470603, EPI_ISL_1470605, EPI_ISL_1470607, EPI_ISL_1470612, EPI_ISL_1470614, EPI_ISL_1470618, EPI_ISL_1470619, EPI_ISL_1470628, EPI_ISL_1470634, EPI_ISL_1470635, EPI_ISL_1470637, EPI_ISL_1470640, EPI_ISL_1470646, EPI_ISL_1470648, EPI_ISL_1470649, EPI_ISL_1470650, EPI_ISL_1470653, EPI_ISL_1470654, EPI_ISL_1470662, EPI_ISL_1470672, EPI_ISL_1470674, EPI_ISL_1470676, EPI_ISL_1470677, EPI_ISL_1470678, EPI_ISL_1470681, EPI_ISL_1470683, EPI_ISL_1470686, EPI_ISL_1470688, EPI_ISL_1470689, EPI_ISL_1470693, EPI_ISL_1470694, EPI_ISL_1470695, EPI_ISL_1470696, EPI_ISL_1470697, EPI_ISL_1470700, EPI_ISL_1470705, EPI_ISL_1470706, EPI_ISL_1470707, EPI_ISL_1470712, EPI_ISL_1470714, EPI_ISL_1470715, EPI_ISL_1470718, EPI_ISL_1470718, EPI_ISL_1470720, EPI_ISL_1470721, EPI_ISL_1470725, EPI_ISL_1470726, EPI_ISL_1470728, EPI_ISL_1470730, EPI_ISL_1470731, EPI_ISL_1470738, EPI_ISL_1470739                                                                                                                                                                                                                                                                                                                                                                                                                                                                                                                                                                                                                                                                                                                                                                                                                                                                                                                                                                                                                                                                                                                                                                                                                                                                                                                                                                                                                                                                                                                                                                                                                                                                                                                                                                                                                                                                                                                                                                                                                                                                                                                                                                                                                                                                                                                                                                                                                                                                                                                                                                                                                                                                                                                                                                                                                                                                                                                                                                                                                                                                                                                                                                                                                                                                                                                             | see above                                       | The Jackson Laboratory                                                                    | The Jackson Laboratory                                                                                                                                                                                                                                                                                                                                                                                                                                                                                                                                                                                                                                                                                                                                                                                                                                                                                                                                                                                                                        | Bergeron D, Renzette N, Adams M, Omerza G, Kelly K, Li L |
| EPI_ISL_1470744, EPI_ISL_1470754, EPI_ISL_1470758, EPI_ISL_1470765, EPI_ISL_1470770, EPI_ISL_1470780, EPI_ISL_1470781, EPI_ISL_1470782, EPI_ISL_1470787, EPI_ISL_1470790, EPI_ISL_1470795, EPI_ISL_1470802, EPI_ISL_1470803, EPI_ISL_1470813, EPI_ISL_1470815, EPI_ISL_1470821, EPI_ISL_1470823, EPI_ISL_1470830, EPI_ISL_1470833, EPI_ISL_1470843, EPI_ISL_1470847, EPI_ISL_1470851, EPI_ISL_1470853, EPI_ISL_1470860, EPI_ISL_1470861, EPI_ISL_1470871, EPI_ISL_1470873, EPI_ISL_1470874, EPI_ISL_1470876, EPI_ISL_1470880, EPI_ISL_1470882, EPI_ISL_1470886, EPI_ISL_1470889, EPI_ISL_1470901, EPI_ISL_1470902, EPI_ISL_1470903, EPI_ISL_1470905, EPI_ISL_1470909, EPI_ISL_1470916, EPI_ISL_1470927, EPI_ISL_1470931, EPI_ISL_1470932, EPI_ISL_1470933, EPI_ISL_1470936, EPI_ISL_1470947, EPI_ISL_1470954, EPI_ISL_1470963, EPI_ISL_1470975, EPI_ISL_1470978, EPI_ISL_1470984, EPI_ISL_1470986, EPI_ISL_1470989, EPI_ISL_1471000, EPI_ISL_1471009, EPI_ISL_1471021, EPI_ISL_1471026, EPI_ISL_1471028, EPI_ISL_1471030, EPI_ISL_1471036, EPI_ISL_1471041, EPI_ISL_1471048, EPI_ISL_1471050, EPI_ISL_1471051, EPI_ISL_1471053, EPI_ISL_1471054, EPI_ISL_1471067, EPI_ISL_1471068, EPI_ISL_1471072, EPI_ISL_1471076, EPI_ISL_1471080, EPI_ISL_1471088, EPI_ISL_1471092, EPI_ISL_1471099, EPI_ISL_1471105, EPI_ISL_1471109, EPI_ISL_1471111, EPI_ISL_1471123, EPI_ISL_1471130, EPI_ISL_1471135, EPI_ISL_1471139, EPI_ISL_1471143, EPI_ISL_1471163, EPI_ISL_1471166, EPI_ISL_1471169, EPI_ISL_1471173, EPI_ISL_1471176, EPI_ISL_1471178, EPI_ISL_1471179, EPI_ISL_1471190, EPI_ISL_1471191, EPI_ISL_1471197, EPI_ISL_1471208, EPI_ISL_1471209, EPI_ISL_1471211, EPI_ISL_1471213, EPI_ISL_1471216, EPI_ISL_1471220, EPI_ISL_1471222, EPI_ISL_1471224, EPI_ISL_1471238, EPI_ISL_1471240, EPI_ISL_1471242, EPI_ISL_1471243, EPI_ISL_1471250, EPI_ISL_1471253, EPI_ISL_1471256, EPI_ISL_1471264, EPI_ISL_1471267, EPI_ISL_1471273, EPI_ISL_1471284, EPI_ISL_1471284, EPI_ISL_1471293, EPI_ISL_1471295, EPI_ISL_1471298, EPI_ISL_1471301, EPI_ISL_1471318, EPI_ISL_1471323, EPI_ISL_1471324, EPI_ISL_1471335, EPI_ISL_1471340, EPI_ISL_1471342, EPI_ISL_1471358, EPI_ISL_1471365, EPI_ISL_1471366, EPI_ISL_1471389, EPI_ISL_1471393, EPI_ISL_1471394, EPI_ISL_1471395, EPI_ISL_1471400, EPI_ISL_1471402, EPI_ISL_1471408, EPI_ISL_1471409, EPI_ISL_1471421, EPI_ISL_1471424, EPI_ISL_1471425, EPI_ISL_1471429, EPI_ISL_1471436, EPI_ISL_1471443, EPI_ISL_1471446, EPI_ISL_1471452, EPI_ISL_1471461, EPI_ISL_1471462, EPI_ISL_1471464, EPI_ISL_1471465, EPI_ISL_1471496, EPI_ISL_1471503, EPI_ISL_1471507, EPI_ISL_1471509, EPI_ISL_1471510, EPI_ISL_1471520, EPI_ISL_1471525, EPI_ISL_1471527, EPI_ISL_1471532, EPI_ISL_1471537, EPI_ISL_1471540, EPI_ISL_1471552, EPI_ISL_1471560, EPI_ISL_1471568, EPI_ISL_1471569, EPI_ISL_1471571, EPI_ISL_1471586, EPI_ISL_1471589, EPI_ISL_1471590, EPI_ISL_1471593, EPI_ISL_1471625, EPI_ISL_1471633, EPI_ISL_1471634, EPI_ISL_1471635, EPI_ISL_1471644, EPI_ISL_1471646, EPI_ISL_1471656, EPI_ISL_1471658, EPI_ISL_1471669, EPI_ISL_1471677, EPI_ISL_1471679, EPI_ISL_1471680, EPI_ISL_1471683, EPI_ISL_1471686, EPI_ISL_1471688, EPI_ISL_1471690, EPI_ISL_1471692, EPI_ISL_1471698, EPI_ISL_1471701, EPI_ISL_1471704, EPI_ISL_1471707, EPI_ISL_1471710, EPI_ISL_1471712, EPI_ISL_1471716, EPI_ISL_1471718, EPI_ISL_1471720, EPI_ISL_1471721, EPI_ISL_1471723, EPI_ISL_1471730, EPI_ISL_1471736, EPI_ISL_1471741, EPI_ISL_1471755, EPI_ISL_1471762, EPI_ISL_1471766, EPI_ISL_1471783, EPI_ISL_1471789, EPI_ISL_1471791, EPI_ISL_1471796, EPI_ISL_1471800, EPI_ISL_1471804, EPI_ISL_1471808, EPI_ISL_1471816, EPI_ISL_1471820, EPI_ISL_1471824, EPI_ISL_1471827, EPI_ISL_1471843, EPI_ISL_1471847, EPI_ISL_1471852, EPI_ISL_1471855, EPI_ISL_1471857, EPI_ISL_1471865, EPI_ISL_1471866, EPI_ISL_1471876, EPI_ISL_1471879, EPI_ISL_1471896, EPI_ISL_1471898, EPI_ISL_1471900, EPI_ISL_1471908, EPI_ISL_1471911, EPI_ISL_1471913, EPI_ISL_1471916, EPI_ISL_1471920, EPI_ISL_1471921, EPI_ISL_1471925, EPI_ISL_1471927, EPI_ISL_1471930, EPI_ISL_1471931, EPI_ISL_1471933, EPI_ISL_1471939, EPI_ISL_1471943, EPI_ISL_1471957, EPI_ISL_1471986, EPI_ISL_1471988, EPI_ISL_1471989, EPI_ISL_1472006, EPI_ISL_1472013, EPI_ISL_1472014, EPI_ISL_1472015, EPI_ISL_1472016, EPI_ISL_1472018, EPI_ISL_1472021, EPI_ISL_1472024, EPI_ISL_1472026, EPI_ISL_1472032, EPI_ISL_1472053, EPI_ISL_1472055, EPI_ISL_1472057, EPI_ISL_1472064, EPI_ISL_1472066, EPI_ISL_1472068, EPI_ISL_1472074 |                                                 |                                                                                           |                                                                                                                                                                                                                                                                                                                                                                                                                                                                                                                                                                                                                                                                                                                                                                                                                                                                                                                                                                                                                                               |                                                          |
| EPI_ISL_1477057                                                                                                                                                                                                                                                                                                                                                                                                                                                                                                                                                                                                                                                                                                                                                                                                                                                                                                                                                                                                                                                                                                                                                                                                                                                                                                                                                                                                                                                                                                                                                                                                                                                                                                                                                                                                                                                                                                                                                                                                                                                                                                                                                                                                                                                                                                                                                                                                                                                                                                                                                                                                                                                                                                                                                                                                                                                                                                                                                                                                                                                                                                                                                                                                                                                                                                                                                                                                                                                                                                                                                                                                                                                                                                                                                                                                                                                                                                                                                                                                                                                                                                                                                                                                                                                                                                                                                                                                                                                                                               | Hospital General Universitario Gregorio Marañón | Hospital General Universitario Gregorio Marañón                                           | Sergio Buenestado Serrano, Pedro Sola Campoy, Laura Pérez-Lago, Cristina Rodríguez-Grande, Pilar Catalán, Patricia Muñoz, Darío García de Viedma                                                                                                                                                                                                                                                                                                                                                                                                                                                                                                                                                                                                                                                                                                                                                                                                                                                                                              |                                                          |
| EPI_ISL_1478113                                                                                                                                                                                                                                                                                                                                                                                                                                                                                                                                                                                                                                                                                                                                                                                                                                                                                                                                                                                                                                                                                                                                                                                                                                                                                                                                                                                                                                                                                                                                                                                                                                                                                                                                                                                                                                                                                                                                                                                                                                                                                                                                                                                                                                                                                                                                                                                                                                                                                                                                                                                                                                                                                                                                                                                                                                                                                                                                                                                                                                                                                                                                                                                                                                                                                                                                                                                                                                                                                                                                                                                                                                                                                                                                                                                                                                                                                                                                                                                                                                                                                                                                                                                                                                                                                                                                                                                                                                                                                               | CA DPH Viral and Rickettsial Disease Laboratory | Chan-Zuckerberg Biohub                                                                    | CZB Ciliahub Consortium                                                                                                                                                                                                                                                                                                                                                                                                                                                                                                                                                                                                                                                                                                                                                                                                                                                                                                                                                                                                                       |                                                          |
| EPI_ISL_1481723, EPI_ISL_1481724, EPI_ISL_1481755, EPI_ISL_1481927, EPI_ISL_1481967, EPI_ISL_1482119, EPI_ISL_1482125                                                                                                                                                                                                                                                                                                                                                                                                                                                                                                                                                                                                                                                                                                                                                                                                                                                                                                                                                                                                                                                                                                                                                                                                                                                                                                                                                                                                                                                                                                                                                                                                                                                                                                                                                                                                                                                                                                                                                                                                                                                                                                                                                                                                                                                                                                                                                                                                                                                                                                                                                                                                                                                                                                                                                                                                                                                                                                                                                                                                                                                                                                                                                                                                                                                                                                                                                                                                                                                                                                                                                                                                                                                                                                                                                                                                                                                                                                                                                                                                                                                                                                                                                                                                                                                                                                                                                                                         | Fulgent Genetics                                | Centers for Disease Control and Prevention Division of Viral Diseases, Pathogen Discovery | Dakota Howard, Dhvani Batra, Peter W. Cook, Kara Moser, Adrian Paskey, Jason Caravas, Benjamin Rambo-Martin, Shatavia Morrison, Christopher Gulvick, Scott Sammons, Yvette Unoarumhi, Darlene Wagner, Matthew Schmeier, Harry Gao, Mickey Li, John Gao, Joseph Fierro, Benafsh Sapra, Becky Tsai, Yan Meng, Doreen Ng, James Xie, Clinton R. Paden, Duncan MacCannell                                                                                                                                                                                                                                                                                                                                                                                                                                                                                                                                                                                                                                                                         |                                                          |
| EPI_ISL_1482288                                                                                                                                                                                                                                                                                                                                                                                                                                                                                                                                                                                                                                                                                                                                                                                                                                                                                                                                                                                                                                                                                                                                                                                                                                                                                                                                                                                                                                                                                                                                                                                                                                                                                                                                                                                                                                                                                                                                                                                                                                                                                                                                                                                                                                                                                                                                                                                                                                                                                                                                                                                                                                                                                                                                                                                                                                                                                                                                                                                                                                                                                                                                                                                                                                                                                                                                                                                                                                                                                                                                                                                                                                                                                                                                                                                                                                                                                                                                                                                                                                                                                                                                                                                                                                                                                                                                                                                                                                                                                               | NYC Pandemic Response Lab                       | Wadsworth Center, New York State Department of Health                                     | Kirsten St. George, Daryl M. Lamson, Alexis Russell, Matthew Shudt, Melissa A Leisner, Jonathan Pitnick, Catharine Prussing, Navjot Singh, John Kelly,                                                                                                                                                                                                                                                                                                                                                                                                                                                                                                                                                                                                                                                                                                                                                                                                                                                                                        |                                                          |

|                                                                                                                                                                                                                                                                                                                                                                                                                                                                                                                                                                                                                                                                                                                                                                                                                                                                                                                                                                                                                                                                                                               |                                                                                                           |                                                                                           |                                                                                                                                                                                                                                                                                                                                                                                                                                                       |
|---------------------------------------------------------------------------------------------------------------------------------------------------------------------------------------------------------------------------------------------------------------------------------------------------------------------------------------------------------------------------------------------------------------------------------------------------------------------------------------------------------------------------------------------------------------------------------------------------------------------------------------------------------------------------------------------------------------------------------------------------------------------------------------------------------------------------------------------------------------------------------------------------------------------------------------------------------------------------------------------------------------------------------------------------------------------------------------------------------------|-----------------------------------------------------------------------------------------------------------|-------------------------------------------------------------------------------------------|-------------------------------------------------------------------------------------------------------------------------------------------------------------------------------------------------------------------------------------------------------------------------------------------------------------------------------------------------------------------------------------------------------------------------------------------------------|
| EPI_ISL_1482303, EPI_ISL_1482307, EPI_ISL_1482309                                                                                                                                                                                                                                                                                                                                                                                                                                                                                                                                                                                                                                                                                                                                                                                                                                                                                                                                                                                                                                                             | URMC LABS                                                                                                 | Wadsworth Center, New York State Department of Health                                     | Kirsten St. George, Daryl M. Lamson, Alexis Russell, Matthew Shudt, Melissa A Leisner, Jonathan Plitnick, Catharine Prussing, Navjot Singh, John Kelly, Erasmus Schneider, Erica Lasek-Nesselquist                                                                                                                                                                                                                                                    |
| EPI_ISL_1482343                                                                                                                                                                                                                                                                                                                                                                                                                                                                                                                                                                                                                                                                                                                                                                                                                                                                                                                                                                                                                                                                                               | MONTEFIORE NEW ROCHELLE HOSPITAL LABORATORY                                                               | Wadsworth Center, New York State Department of Health                                     | Kirsten St. George, Daryl M. Lamson, Alexis Russell, Matthew Shudt, Melissa A Leisner, Jonathan Plitnick, Catharine Prussing, Navjot Singh, John Kelly, Erasmus Schneider, Erica Lasek-Nesselquist                                                                                                                                                                                                                                                    |
| EPI_ISL_1482394, EPI_ISL_1482396, EPI_ISL_1482398, EPI_ISL_1482400, EPI_ISL_1482401                                                                                                                                                                                                                                                                                                                                                                                                                                                                                                                                                                                                                                                                                                                                                                                                                                                                                                                                                                                                                           | WESTCHESTER MEDICAL CENTER                                                                                | Wadsworth Center, New York State Department of Health                                     | Kirsten St. George, Daryl M. Lamson, Alexis Russell, Matthew Shudt, Melissa A Leisner, Jonathan Plitnick, Catharine Prussing, Navjot Singh, John Kelly, Erasmus Schneider, Erica Lasek-Nesselquist                                                                                                                                                                                                                                                    |
| EPI_ISL_1482408                                                                                                                                                                                                                                                                                                                                                                                                                                                                                                                                                                                                                                                                                                                                                                                                                                                                                                                                                                                                                                                                                               | BOSTON HEART DIAGNOSTICS CORP                                                                             | Wadsworth Center, New York State Department of Health                                     | Kirsten St. George, Daryl M. Lamson, Alexis Russell, Matthew Shudt, Melissa A Leisner, Jonathan Plitnick, Catharine Prussing, Navjot Singh, John Kelly, Erasmus Schneider, Erica Lasek-Nesselquist                                                                                                                                                                                                                                                    |
| EPI_ISL_1482414, EPI_ISL_1482418, EPI_ISL_1482427, EPI_ISL_1482428                                                                                                                                                                                                                                                                                                                                                                                                                                                                                                                                                                                                                                                                                                                                                                                                                                                                                                                                                                                                                                            | WESTCHESTER MEDICAL CENTER                                                                                | Wadsworth Center, New York State Department of Health                                     | Kirsten St. George, Daryl M. Lamson, Alexis Russell, Matthew Shudt, Melissa A Leisner, Jonathan Plitnick, Catharine Prussing, Navjot Singh, John Kelly, Erasmus Schneider, Erica Lasek-Nesselquist                                                                                                                                                                                                                                                    |
| EPI_ISL_1482456, EPI_ISL_1482462, EPI_ISL_1482463                                                                                                                                                                                                                                                                                                                                                                                                                                                                                                                                                                                                                                                                                                                                                                                                                                                                                                                                                                                                                                                             | ALBANY MEDICAL CENTER                                                                                     | Wadsworth Center, New York State Department of Health                                     | Kirsten St. George, Daryl M. Lamson, Alexis Russell, Matthew Shudt, Melissa A Leisner, Jonathan Plitnick, Catharine Prussing, Navjot Singh, John Kelly, Erasmus Schneider, Erica Lasek-Nesselquist                                                                                                                                                                                                                                                    |
| EPI_ISL_1482545, EPI_ISL_1482546, EPI_ISL_1482547, EPI_ISL_1482550, EPI_ISL_1482553                                                                                                                                                                                                                                                                                                                                                                                                                                                                                                                                                                                                                                                                                                                                                                                                                                                                                                                                                                                                                           | WESTCHESTER MEDICAL CENTER                                                                                | Wadsworth Center, New York State Department of Health                                     | Kirsten St. George, Daryl M. Lamson, Alexis Russell, Matthew Shudt, Melissa A Leisner, Jonathan Plitnick, Catharine Prussing, Navjot Singh, John Kelly, Erasmus Schneider, Erica Lasek-Nesselquist                                                                                                                                                                                                                                                    |
| EPI_ISL_1482557, EPI_ISL_1482565, EPI_ISL_1482566, EPI_ISL_1482567                                                                                                                                                                                                                                                                                                                                                                                                                                                                                                                                                                                                                                                                                                                                                                                                                                                                                                                                                                                                                                            | NORTHWELL HEALTH LABORATORIES                                                                             | Wadsworth Center, New York State Department of Health                                     | Kirsten St. George, Daryl M. Lamson, Alexis Russell, Matthew Shudt, Melissa A Leisner, Jonathan Plitnick, Catharine Prussing, Navjot Singh, John Kelly, Erasmus Schneider, Erica Lasek-Nesselquist                                                                                                                                                                                                                                                    |
| EPI_ISL_1482576                                                                                                                                                                                                                                                                                                                                                                                                                                                                                                                                                                                                                                                                                                                                                                                                                                                                                                                                                                                                                                                                                               | WHITE PLAINS HOSPITAL CENTER LABORATORY                                                                   | Wadsworth Center, New York State Department of Health                                     | Kirsten St. George, Daryl M. Lamson, Alexis Russell, Matthew Shudt, Melissa A Leisner, Jonathan Plitnick, Catharine Prussing, Navjot Singh, John Kelly, Erasmus Schneider, Erica Lasek-Nesselquist                                                                                                                                                                                                                                                    |
| EPI_ISL_1482583, EPI_ISL_1482603, EPI_ISL_1482608, EPI_ISL_1482609                                                                                                                                                                                                                                                                                                                                                                                                                                                                                                                                                                                                                                                                                                                                                                                                                                                                                                                                                                                                                                            | NORTHWELL HEALTH LABORATORIES                                                                             | Wadsworth Center, New York State Department of Health                                     | Kirsten St. George, Daryl M. Lamson, Alexis Russell, Matthew Shudt, Melissa A Leisner, Jonathan Plitnick, Catharine Prussing, Navjot Singh, John Kelly, Erasmus Schneider, Erica Lasek-Nesselquist                                                                                                                                                                                                                                                    |
| EPI_ISL_1482617, EPI_ISL_1482619, EPI_ISL_1482620, EPI_ISL_1482621, EPI_ISL_1482622, EPI_ISL_1482623                                                                                                                                                                                                                                                                                                                                                                                                                                                                                                                                                                                                                                                                                                                                                                                                                                                                                                                                                                                                          | WESTCHESTER MEDICAL CENTER                                                                                | Wadsworth Center, New York State Department of Health                                     | Kirsten St. George, Daryl M. Lamson, Alexis Russell, Matthew Shudt, Melissa A Leisner, Jonathan Plitnick, Catharine Prussing, Navjot Singh, John Kelly, Erasmus Schneider, Erica Lasek-Nesselquist                                                                                                                                                                                                                                                    |
| EPI_ISL_1483256                                                                                                                                                                                                                                                                                                                                                                                                                                                                                                                                                                                                                                                                                                                                                                                                                                                                                                                                                                                                                                                                                               | Nevada State Public Health Laboratory                                                                     | Nevada State Public Health Laboratory                                                     | Andrew Gorzalski, Mark Pandori                                                                                                                                                                                                                                                                                                                                                                                                                        |
| EPI_ISL_1483590                                                                                                                                                                                                                                                                                                                                                                                                                                                                                                                                                                                                                                                                                                                                                                                                                                                                                                                                                                                                                                                                                               | Alaska State Virology Laboratory                                                                          | Alaska State Virology Laboratory                                                          | Stephanie DeRonde, Elva House, Lisa Smith, Ph.D., Jack Chen, Ph.D.                                                                                                                                                                                                                                                                                                                                                                                    |
| EPI_ISL_1489661, EPI_ISL_1489662, EPI_ISL_1489667, EPI_ISL_1489675, EPI_ISL_1489680, EPI_ISL_1489688, EPI_ISL_1489691, EPI_ISL_1489700, EPI_ISL_1489707, EPI_ISL_1489709, EPI_ISL_1489712, EPI_ISL_1489714                                                                                                                                                                                                                                                                                                                                                                                                                                                                                                                                                                                                                                                                                                                                                                                                                                                                                                    | NJDOH, Public Health and Environmental Laboratories                                                       | New Jersey Public Health and Environmental Laboratories (NJ PHEL)                         | Lindsey Bodnar, Shiv K. Verma, Dana Woell, Byeong Jeong                                                                                                                                                                                                                                                                                                                                                                                               |
| see above                                                                                                                                                                                                                                                                                                                                                                                                                                                                                                                                                                                                                                                                                                                                                                                                                                                                                                                                                                                                                                                                                                     |                                                                                                           |                                                                                           |                                                                                                                                                                                                                                                                                                                                                                                                                                                       |
| EPI_ISL_1489728                                                                                                                                                                                                                                                                                                                                                                                                                                                                                                                                                                                                                                                                                                                                                                                                                                                                                                                                                                                                                                                                                               | National Public Health Laboratory, National Centre for Infectious Diseases                                | National Public Health Laboratory, National Centre for Infectious Diseases                | Tze Minn Mak, Zhenyang Zhou, Grace Jie Yin Ngan, Royce Ang, Lin Cui, Raymond Tzer Pin Lin                                                                                                                                                                                                                                                                                                                                                             |
| EPI_ISL_1489870                                                                                                                                                                                                                                                                                                                                                                                                                                                                                                                                                                                                                                                                                                                                                                                                                                                                                                                                                                                                                                                                                               | Missouri State Public Health Laboratory                                                                   | Missouri State Public Health Laboratory                                                   | Matthew Sinn, Joshua Barry, Ashley New                                                                                                                                                                                                                                                                                                                                                                                                                |
| EPI_ISL_1491424                                                                                                                                                                                                                                                                                                                                                                                                                                                                                                                                                                                                                                                                                                                                                                                                                                                                                                                                                                                                                                                                                               | University of Michigan Clinical Microbiology Laboratory                                                   | Lauring Lab, University of Michigan, Department of Microbiology and Immunology            | Valesano                                                                                                                                                                                                                                                                                                                                                                                                                                              |
| EPI_ISL_1491770, EPI_ISL_1491776, EPI_ISL_1491780, EPI_ISL_1491795, EPI_ISL_1491833, EPI_ISL_1491846, EPI_ISL_1491849, EPI_ISL_1491853, EPI_ISL_1491862, EPI_ISL_1491865, EPI_ISL_1491867, EPI_ISL_1491868, EPI_ISL_1491880, EPI_ISL_1491890, EPI_ISL_1491894, EPI_ISL_1491896, EPI_ISL_1491901, EPI_ISL_1491904, EPI_ISL_1491945, EPI_ISL_1491949                                                                                                                                                                                                                                                                                                                                                                                                                                                                                                                                                                                                                                                                                                                                                            | see above                                                                                                 | Centers for Disease Control and Prevention Division of Viral Diseases, Pathogen Discovery | Dakota Howard, Dhvani Batra, Peter W. Cook, Kara Moser, Adrian Paskey, Jason Caravas, Benjamin Rambo-Martin, Shatavia Morrison, Christopher Gulvick, Scott Sammons, Yvette Unoarumhi, Darlene Wagner, Matthew Schmeer, Cyndi Clark, Patrick Campbell, Rob Case, Vikramsinha Ghorpade, Holy Houdeshell, Ola Kvalvaag, Dillon Nall, Ethan Sanders, Alec Vest, Shaun Westlund, Matthew Hardison, Clinton R. Paden, Duncan MacCannell                     |
| see above                                                                                                                                                                                                                                                                                                                                                                                                                                                                                                                                                                                                                                                                                                                                                                                                                                                                                                                                                                                                                                                                                                     | Aegis Sciences Corporation                                                                                |                                                                                           |                                                                                                                                                                                                                                                                                                                                                                                                                                                       |
| EPI_ISL_1491953, EPI_ISL_1491954, EPI_ISL_1491959, EPI_ISL_1491963, EPI_ISL_1491975, EPI_ISL_1491994, EPI_ISL_1492005, EPI_ISL_1492006, EPI_ISL_1492007, EPI_ISL_1492013, EPI_ISL_1492018, EPI_ISL_1492026, EPI_ISL_1492118, EPI_ISL_1492131                                                                                                                                                                                                                                                                                                                                                                                                                                                                                                                                                                                                                                                                                                                                                                                                                                                                  | see above                                                                                                 | Centers for Disease Control and Prevention Division of Viral Diseases, Pathogen Discovery | Dakota Howard, Dhvani Batra, Peter W. Cook, Kara Moser, Adrian Paskey, Jason Caravas, Benjamin Rambo-Martin, Shatavia Morrison, Christopher Gulvick, Scott Sammons, Yvette Unoarumhi, Darlene Wagner, Matthew Schmeer, S. H. Rosenthal, A. Gerasimova, R. M. Kagan, B. Anderson, M. Hua, Y. Liu, L.E. Bernstein, K.E. Livingston, A. Perez, I. A. Shlyakhter, R. V. Rolando, R. Owen, P. Tanpaiboon, F. Lacbawan, Clinton R. Paden, Duncan MacCannell |
| EPI_ISL_1492456                                                                                                                                                                                                                                                                                                                                                                                                                                                                                                                                                                                                                                                                                                                                                                                                                                                                                                                                                                                                                                                                                               | LESP Jalisco                                                                                              | Instituto de diagnóstico y Referencia Epidemiologicos (INDRE)                             | Claudia Wong-Arambula, Abril Rodriguez-Maldonado, Vanessa Rivero-Arredondo, Ariadna Medina-Benitez, Joaquin Quiroz-Mercado, Sergio Rangel-Guerrero, Natividad Cruz-Ortiz, Tatiana Nunez-Garcia, Gisela Barrera-Badillo, Lucia Hernandez-Rivas, Irma Lopez-Martinez, Ernesto Ramirez-Gonzalez.                                                                                                                                                         |
| EPI_ISL_1492629                                                                                                                                                                                                                                                                                                                                                                                                                                                                                                                                                                                                                                                                                                                                                                                                                                                                                                                                                                                                                                                                                               | Idaho Bureau of Laboratories                                                                              | Idaho Bureau of Laboratories                                                              | "R. Beukelman, Matthew Charles Burns, Aimee Ceniseros, Robert L. Voermans, Christopher Ball"                                                                                                                                                                                                                                                                                                                                                          |
| EPI_ISL_1493364                                                                                                                                                                                                                                                                                                                                                                                                                                                                                                                                                                                                                                                                                                                                                                                                                                                                                                                                                                                                                                                                                               | Oregon State Public Health Laboratory                                                                     | Oregon State Public Health Laboratory                                                     | Rafia Razzaque, Eugene Yeboah, Vanda Makris, Laura Tsaknaridis, John Fontana and Shane Sevey                                                                                                                                                                                                                                                                                                                                                          |
| EPI_ISL_1493450, EPI_ISL_1493458, EPI_ISL_1493460, EPI_ISL_1493471, EPI_ISL_1493476, EPI_ISL_1493483, EPI_ISL_1493484, EPI_ISL_1493489, EPI_ISL_1493492                                                                                                                                                                                                                                                                                                                                                                                                                                                                                                                                                                                                                                                                                                                                                                                                                                                                                                                                                       | NJDOH, Public Health and Environmental Laboratories                                                       | NJ_PHEL                                                                                   | Lindsey Bodnar, Shiv K. Verma, Dana Woell, Byeong Jeong                                                                                                                                                                                                                                                                                                                                                                                               |
| EPI_ISL_1500241, EPI_ISL_1500242                                                                                                                                                                                                                                                                                                                                                                                                                                                                                                                                                                                                                                                                                                                                                                                                                                                                                                                                                                                                                                                                              | Illinois Department of Public Health - Springfield Lab                                                    | Illinois Department of Public Health - Springfield Lab                                    | Bryan Sim, Gordon McCall                                                                                                                                                                                                                                                                                                                                                                                                                              |
| EPI_ISL_1500596                                                                                                                                                                                                                                                                                                                                                                                                                                                                                                                                                                                                                                                                                                                                                                                                                                                                                                                                                                                                                                                                                               | Clinical Microbiology Laboratory, NewYork Presbyterian Hospital/Columbia University Irving Medical Center | Uhlemann Laboratory, Columbia University Irving Medical Center                            | Medini K. Annavajhala, Anne-Catrin Uhlemann, Hiroshi Mohri, David Ho                                                                                                                                                                                                                                                                                                                                                                                  |
| EPI_ISL_1500650, EPI_ISL_1500768                                                                                                                                                                                                                                                                                                                                                                                                                                                                                                                                                                                                                                                                                                                                                                                                                                                                                                                                                                                                                                                                              | Sonora Quest Laboratories                                                                                 | TGen North                                                                                | "Jolene Bowers, Heather Centner, Chris French, Hayley Yaglom, Ashlyn Pfeiffer, Darrin Lemmer, Dave Engelthaler, The Arizona COVID Genomics Union (ACGU)"                                                                                                                                                                                                                                                                                              |
| EPI_ISL_1501687                                                                                                                                                                                                                                                                                                                                                                                                                                                                                                                                                                                                                                                                                                                                                                                                                                                                                                                                                                                                                                                                                               | Northwestern Memorial Hospital                                                                            | Northwestern University - Ozer Lab                                                        | Ramon Lorenzo-Redondo, Lacy M. Simons, Taylor J. Dean, Chad J. Achenbach, Lawrence J. Jennings, Chao Qi, Michael G. Ison, Judd F. Hultquist, Egon A. Ozer                                                                                                                                                                                                                                                                                             |
| EPI_ISL_1503483, EPI_ISL_1503791                                                                                                                                                                                                                                                                                                                                                                                                                                                                                                                                                                                                                                                                                                                                                                                                                                                                                                                                                                                                                                                                              | Massachusetts State Public Health Laboratory                                                              | Massachusetts State Public Health Laboratory                                              | Andrew Lang, Timelia Fink, Glen Gallagher, Sandra Smole                                                                                                                                                                                                                                                                                                                                                                                               |
| EPI_ISL_1509105, EPI_ISL_1509106, EPI_ISL_1509107, EPI_ISL_1509110, EPI_ISL_1509114, EPI_ISL_1509117, EPI_ISL_1509122, EPI_ISL_1509123, EPI_ISL_1509126, EPI_ISL_1509127, EPI_ISL_1509132, EPI_ISL_1509134, EPI_ISL_1509135, EPI_ISL_1509139, EPI_ISL_1509140, EPI_ISL_1509143, EPI_ISL_1509146, EPI_ISL_1509147, EPI_ISL_1509148, EPI_ISL_1509149, EPI_ISL_1509150, EPI_ISL_1509151, EPI_ISL_1509152, EPI_ISL_1509154, EPI_ISL_1509155, EPI_ISL_1509159, EPI_ISL_1509160, EPI_ISL_1509162, EPI_ISL_1509163, EPI_ISL_1509166, EPI_ISL_1509167, EPI_ISL_1509168, EPI_ISL_1509172, EPI_ISL_1509175, EPI_ISL_1509176, EPI_ISL_1509179, EPI_ISL_1509184, EPI_ISL_1509187, EPI_ISL_1509189, EPI_ISL_1509197, EPI_ISL_1509198, EPI_ISL_1509199, EPI_ISL_1509200, EPI_ISL_1509202, EPI_ISL_1509203, EPI_ISL_1509204, EPI_ISL_1509205, EPI_ISL_1509215, EPI_ISL_1509219, EPI_ISL_1509222, EPI_ISL_1509223, EPI_ISL_1509224, EPI_ISL_1509225, EPI_ISL_1509230, EPI_ISL_1509232, EPI_ISL_1509233, EPI_ISL_1509236, EPI_ISL_1509241, EPI_ISL_1509249, EPI_ISL_1509253, EPI_ISL_1509254, EPI_ISL_1509255, EPI_ISL_1509258 | see above                                                                                                 | Grubaugh Lab - Yale School of Public Health                                               | Joseph Fauver, Mallery Breban, Isabell Ott, Tara Alpert, Mary Petrone, Anderson Brito, Chantal Vogels, Annie Watkins, Chaney Kalinich, Jessica Rothman, Marie L. Landry, Nathan Grubaugh                                                                                                                                                                                                                                                              |
| EPI_ISL_1509266, EPI_ISL_1509267                                                                                                                                                                                                                                                                                                                                                                                                                                                                                                                                                                                                                                                                                                                                                                                                                                                                                                                                                                                                                                                                              | Murphy Medical Association                                                                                | Grubaugh Lab - Yale School of Public Health                                               | Joseph Fauver, Mallery Breban, Isabel Ott, Tara Alpert, Mary Petrone, Anderson Brito, Chantal Vogels, Annie Watkins, Chaney Kalinich, Jessica Rothman,                                                                                                                                                                                                                                                                                                |

|                                                                                                                                                                                                                                                                                                                                                                                                                                                                                                                                                                                                                                                                                                                                                                                                                                                                                                                                                                                                                                                                                                                                                                                                                                                                                                                                                                                                                                                                                                                                                                                                                                             |                                                                            |                                                                                           |                                                                                                                                                                                                                                                                                                                                                                                                                                                                                                                                                                                                                                                                                                                                                                                                                                                                                                                                                                                                                                                |
|---------------------------------------------------------------------------------------------------------------------------------------------------------------------------------------------------------------------------------------------------------------------------------------------------------------------------------------------------------------------------------------------------------------------------------------------------------------------------------------------------------------------------------------------------------------------------------------------------------------------------------------------------------------------------------------------------------------------------------------------------------------------------------------------------------------------------------------------------------------------------------------------------------------------------------------------------------------------------------------------------------------------------------------------------------------------------------------------------------------------------------------------------------------------------------------------------------------------------------------------------------------------------------------------------------------------------------------------------------------------------------------------------------------------------------------------------------------------------------------------------------------------------------------------------------------------------------------------------------------------------------------------|----------------------------------------------------------------------------|-------------------------------------------------------------------------------------------|------------------------------------------------------------------------------------------------------------------------------------------------------------------------------------------------------------------------------------------------------------------------------------------------------------------------------------------------------------------------------------------------------------------------------------------------------------------------------------------------------------------------------------------------------------------------------------------------------------------------------------------------------------------------------------------------------------------------------------------------------------------------------------------------------------------------------------------------------------------------------------------------------------------------------------------------------------------------------------------------------------------------------------------------|
|                                                                                                                                                                                                                                                                                                                                                                                                                                                                                                                                                                                                                                                                                                                                                                                                                                                                                                                                                                                                                                                                                                                                                                                                                                                                                                                                                                                                                                                                                                                                                                                                                                             |                                                                            |                                                                                           | Caleb Neal, Eva Laszlo, Steven Murphy, Nathan Grubaugh                                                                                                                                                                                                                                                                                                                                                                                                                                                                                                                                                                                                                                                                                                                                                                                                                                                                                                                                                                                         |
| EPI_ISL_1509271                                                                                                                                                                                                                                                                                                                                                                                                                                                                                                                                                                                                                                                                                                                                                                                                                                                                                                                                                                                                                                                                                                                                                                                                                                                                                                                                                                                                                                                                                                                                                                                                                             | Grubaugh Lab - Yale School of Public Health                                | Grubaugh Lab - Yale School of Public Health                                               | Joseph Fauver, Mallery Breban, Isabell Ott, Tara Alpert, Mary Petrone, Anderson Brito, Chantal Vogels, Annie Watkins, Chaney Kalinich, Jessica Rothman, Nathan Grubaugh                                                                                                                                                                                                                                                                                                                                                                                                                                                                                                                                                                                                                                                                                                                                                                                                                                                                        |
| EPI_ISL_1509275, EPI_ISL_1509276                                                                                                                                                                                                                                                                                                                                                                                                                                                                                                                                                                                                                                                                                                                                                                                                                                                                                                                                                                                                                                                                                                                                                                                                                                                                                                                                                                                                                                                                                                                                                                                                            | USC Clinical Lab                                                           | Los Angeles County PHL                                                                    | P. Hemarajata et al.                                                                                                                                                                                                                                                                                                                                                                                                                                                                                                                                                                                                                                                                                                                                                                                                                                                                                                                                                                                                                           |
| EPI_ISL_1511688, EPI_ISL_1511694, EPI_ISL_1511717, EPI_ISL_1511770, EPI_ISL_1511776, EPI_ISL_1511779, EPI_ISL_1511781, EPI_ISL_1511789, EPI_ISL_1511791, EPI_ISL_1511794, EPI_ISL_1511804, EPI_ISL_1511808, EPI_ISL_1511812, EPI_ISL_1511817, EPI_ISL_1511824, EPI_ISL_1511826, EPI_ISL_1511830, EPI_ISL_1511834, EPI_ISL_1511836, EPI_ISL_1511847, EPI_ISL_1511850, EPI_ISL_1511852, EPI_ISL_1511856, EPI_ISL_1511858                                                                                                                                                                                                                                                                                                                                                                                                                                                                                                                                                                                                                                                                                                                                                                                                                                                                                                                                                                                                                                                                                                                                                                                                                      |                                                                            |                                                                                           |                                                                                                                                                                                                                                                                                                                                                                                                                                                                                                                                                                                                                                                                                                                                                                                                                                                                                                                                                                                                                                                |
| see above                                                                                                                                                                                                                                                                                                                                                                                                                                                                                                                                                                                                                                                                                                                                                                                                                                                                                                                                                                                                                                                                                                                                                                                                                                                                                                                                                                                                                                                                                                                                                                                                                                   | Quest Diagnostics Incorporated                                             | Centers for Disease Control and Prevention Division of Viral Diseases, Pathogen Discovery | Dakota Howard, Dhvani Batra, Peter W. Cook, Kara Moser, Adrian Paskey, Jason Caravas, Benjamin Rambo-Martin, Shatavia Morrison, Christopher Gulvick, Scott Sammons, Yvette Unoarumhi, Darlene Wagner, Matthew Schmeier, S. H. Rosenthal, A. Gerasimova, R. M. Kagan, B. Anderson, M. Hua, Y. Liu, L.E. Bernstein, K.E. Livingston, A. Perez, I. A. Shlyakhter, R. V. Rolando, R. Owen, P. Tanpaiboon, F. Lacbawan, Clinton R. Paden, Duncan MacCannell                                                                                                                                                                                                                                                                                                                                                                                                                                                                                                                                                                                         |
| EPI_ISL_1511882, EPI_ISL_1511904, EPI_ISL_1511977, EPI_ISL_1511998, EPI_ISL_1511999, EPI_ISL_1512000, EPI_ISL_1512001, EPI_ISL_1512062, EPI_ISL_1512126, EPI_ISL_1512151, EPI_ISL_1512205, EPI_ISL_1512245, EPI_ISL_1512317, EPI_ISL_1512331, EPI_ISL_1512427, EPI_ISL_1512459, EPI_ISL_1512460, EPI_ISL_1512527, EPI_ISL_1512646, EPI_ISL_1512719, EPI_ISL_1512736                                                                                                                                                                                                                                                                                                                                                                                                                                                                                                                                                                                                                                                                                                                                                                                                                                                                                                                                                                                                                                                                                                                                                                                                                                                                         |                                                                            |                                                                                           |                                                                                                                                                                                                                                                                                                                                                                                                                                                                                                                                                                                                                                                                                                                                                                                                                                                                                                                                                                                                                                                |
| see above                                                                                                                                                                                                                                                                                                                                                                                                                                                                                                                                                                                                                                                                                                                                                                                                                                                                                                                                                                                                                                                                                                                                                                                                                                                                                                                                                                                                                                                                                                                                                                                                                                   | Helix/Illumina                                                             | Centers for Disease Control and Prevention Division of Viral Diseases, Pathogen Discovery | Dakota Howard, Dhvani Batra, Peter W. Cook, Kara Moser, Adrian Paskey, Jason Caravas, Benjamin Rambo-Martin, Shatavia Morrison, Christopher Gulvick, Scott Sammons, Yvette Unoarumhi, Darlene Wagner, Matthew Schmeier, Eileen de Feo, Jan Antico, Christine Tran, Matthew Tolentino, Shannon Wickline, Kim Gietzen, Brad Sickler, Jingtao Liu, Eric Allen, Phil Febbo, Nicole L. Washington, Simon White, Geraint Levan, Kelly Schiabor Barrett, Elizabeth Cirulli, Alexandre Bolze, Ary Ascencio, Charlotte Rivera-Garcia, Ryan Cho, Jason Nguyen, Sherry Wang, Jimmy Ramirez, Tyler Cassens, Eflen Sandoval, Magnus Isaksson, William Lee, David Becker, Marc Laurent, James Lu, Clinton R. Paden, Duncan MacCannell                                                                                                                                                                                                                                                                                                                        |
| EPI_ISL_1512822, EPI_ISL_1512840, EPI_ISL_1512841, EPI_ISL_1512847, EPI_ISL_1512854, EPI_ISL_1512886, EPI_ISL_1512888, EPI_ISL_1512889, EPI_ISL_1512892, EPI_ISL_1512901, EPI_ISL_1512904, EPI_ISL_1512911, EPI_ISL_1512923, EPI_ISL_1512934, EPI_ISL_1512948, EPI_ISL_1512949, EPI_ISL_1513022, EPI_ISL_1513037, EPI_ISL_1513050, EPI_ISL_1513055, EPI_ISL_1513060, EPI_ISL_1513068, EPI_ISL_1513071, EPI_ISL_1513073, EPI_ISL_1513083, EPI_ISL_1513086, EPI_ISL_1513101, EPI_ISL_1513111, EPI_ISL_1513118, EPI_ISL_1513128, EPI_ISL_1513129, EPI_ISL_1513131                                                                                                                                                                                                                                                                                                                                                                                                                                                                                                                                                                                                                                                                                                                                                                                                                                                                                                                                                                                                                                                                              |                                                                            |                                                                                           |                                                                                                                                                                                                                                                                                                                                                                                                                                                                                                                                                                                                                                                                                                                                                                                                                                                                                                                                                                                                                                                |
| see above                                                                                                                                                                                                                                                                                                                                                                                                                                                                                                                                                                                                                                                                                                                                                                                                                                                                                                                                                                                                                                                                                                                                                                                                                                                                                                                                                                                                                                                                                                                                                                                                                                   | Infinity Biologix                                                          | Centers for Disease Control and Prevention Division of Viral Diseases, Pathogen Discovery | Dakota Howard, Dhvani Batra, Peter W. Cook, Kara Moser, Adrian Paskey, Jason Caravas, Benjamin Rambo-Martin, Shatavia Morrison, Christopher Gulvick, Scott Sammons, Yvette Unoarumhi, Darlene Wagner, Matthew Schmeier, Christian Bixby, Yihe Wang, Jonathan Schultz, Chirayu Goswami, Russ Hager, Robin Grimwood, Clinton R. Paden, Duncan MacCannell                                                                                                                                                                                                                                                                                                                                                                                                                                                                                                                                                                                                                                                                                         |
| EPI_ISL_1513141, EPI_ISL_1513151, EPI_ISL_1513156, EPI_ISL_1513166, EPI_ISL_1513212, EPI_ISL_1513223, EPI_ISL_1513231, EPI_ISL_1513235, EPI_ISL_1513329, EPI_ISL_1513331, EPI_ISL_1513338, EPI_ISL_1513390, EPI_ISL_1513482, EPI_ISL_1513486, EPI_ISL_1513519, EPI_ISL_1513562, EPI_ISL_1513564, EPI_ISL_1513567, EPI_ISL_1513568, EPI_ISL_1513575, EPI_ISL_1513577, EPI_ISL_1513581, EPI_ISL_1513602, EPI_ISL_1513605, EPI_ISL_1513616, EPI_ISL_1513620                                                                                                                                                                                                                                                                                                                                                                                                                                                                                                                                                                                                                                                                                                                                                                                                                                                                                                                                                                                                                                                                                                                                                                                    |                                                                            |                                                                                           |                                                                                                                                                                                                                                                                                                                                                                                                                                                                                                                                                                                                                                                                                                                                                                                                                                                                                                                                                                                                                                                |
| see above                                                                                                                                                                                                                                                                                                                                                                                                                                                                                                                                                                                                                                                                                                                                                                                                                                                                                                                                                                                                                                                                                                                                                                                                                                                                                                                                                                                                                                                                                                                                                                                                                                   | Aegis Sciences Corporation                                                 | Centers for Disease Control and Prevention Division of Viral Diseases, Pathogen Discovery | Dakota Howard, Dhvani Batra, Peter W. Cook, Kara Moser, Adrian Paskey, Jason Caravas, Benjamin Rambo-Martin, Shatavia Morrison, Christopher Gulvick, Scott Sammons, Yvette Unoarumhi, Darlene Wagner, Matthew Schmeier, Cyndi Clark, Patrick Campbell, Rob Case, Vikramsinha Ghorpade, Holly Houdeshell, Ola Kvalvaag, Dillon Nall, Ethan Sanders, Alec Vest, Shaun Westlund, Matthew Hardison, Clinton R. Paden, Duncan MacCannell                                                                                                                                                                                                                                                                                                                                                                                                                                                                                                                                                                                                            |
| EPI_ISL_1513637, EPI_ISL_1513638, EPI_ISL_1513639, EPI_ISL_1513643, EPI_ISL_1513647, EPI_ISL_1513654, EPI_ISL_1513680, EPI_ISL_1513849, EPI_ISL_1513883, EPI_ISL_1513903, EPI_ISL_1513943, EPI_ISL_1513954, EPI_ISL_1513992, EPI_ISL_1513994, EPI_ISL_1514031, EPI_ISL_1514085, EPI_ISL_1514147, EPI_ISL_1514213, EPI_ISL_1514219, EPI_ISL_1514220, EPI_ISL_1514278, EPI_ISL_1514284, EPI_ISL_1514317, EPI_ISL_1514320, EPI_ISL_1514323, EPI_ISL_1514329, EPI_ISL_1514345, EPI_ISL_1514348, EPI_ISL_1514353, EPI_ISL_1514354, EPI_ISL_1514355, EPI_ISL_1514357, EPI_ISL_1514364, EPI_ISL_1514443, EPI_ISL_1514532, EPI_ISL_1514544, EPI_ISL_1514591, EPI_ISL_1514612, EPI_ISL_1514621, EPI_ISL_1514627, EPI_ISL_1514632, EPI_ISL_1514638, EPI_ISL_1514640, EPI_ISL_1514642, EPI_ISL_1514644, EPI_ISL_1514651, EPI_ISL_1514652, EPI_ISL_1514664, EPI_ISL_1514669, EPI_ISL_1514681, EPI_ISL_1514686, EPI_ISL_1514691, EPI_ISL_1514692, EPI_ISL_1514695, EPI_ISL_1514696, EPI_ISL_1514703, EPI_ISL_1514716, EPI_ISL_1514787, EPI_ISL_1514890, EPI_ISL_1514896, EPI_ISL_1514898, EPI_ISL_1514941, EPI_ISL_1514980, EPI_ISL_1515004, EPI_ISL_1515018, EPI_ISL_1515025, EPI_ISL_1515075, EPI_ISL_1515076, EPI_ISL_1515083, EPI_ISL_1515089, EPI_ISL_1515097, EPI_ISL_1515098, EPI_ISL_1515106, EPI_ISL_1515108, EPI_ISL_1515133, EPI_ISL_1515155, EPI_ISL_1515249, EPI_ISL_1515318, EPI_ISL_1515325, EPI_ISL_1515326, EPI_ISL_1515327, EPI_ISL_1515329, EPI_ISL_1515334, EPI_ISL_1515349, EPI_ISL_1515375, EPI_ISL_1515411, EPI_ISL_1515431, EPI_ISL_1515467, EPI_ISL_1515493, EPI_ISL_1515518, EPI_ISL_1515519, EPI_ISL_1515590, EPI_ISL_1515703 |                                                                            |                                                                                           |                                                                                                                                                                                                                                                                                                                                                                                                                                                                                                                                                                                                                                                                                                                                                                                                                                                                                                                                                                                                                                                |
| see above                                                                                                                                                                                                                                                                                                                                                                                                                                                                                                                                                                                                                                                                                                                                                                                                                                                                                                                                                                                                                                                                                                                                                                                                                                                                                                                                                                                                                                                                                                                                                                                                                                   | Laboratory Corporation of America                                          | Centers for Disease Control and Prevention Division of Viral Diseases, Pathogen Discovery | Dakota Howard, Dhvani Batra, Peter W. Cook, Kara Moser, Adrian Paskey, Jason Caravas, Benjamin Rambo-Martin, Shatavia Morrison, Christopher Gulvick, Scott Sammons, Yvette Unoarumhi, Darlene Wagner, Matthew Schmeier, Minoo Agarwal, Eyad Almasri, Debby Bole, Ayla Burns, Nuthawin Charoensri, Oren Cohen, Susan Countryman, Mary Ann Cristobal, Bobbi Croy, Suzanne Dale, Hrushikesh Deshmukh, Amanda Douglas, Vincent Drouillon, Marcia Eisenberg, Howard Engler, Rama Ghatti, Prashant Gupta, Susan Hicks, Jake Humphrey, Lax Iyer, Manoj Jain, Mohan Kolli, Brian Krueger, Tim Kuphal, Stanley Letovsky, Michael Levandoski, Craig Lukasik, Jonathan Meltzer, Brian Norvell, Mindy Nye, Scott Parker, Christos Petropoulos, John Pruitt, Steven Ragan, Scott Ryan, Mike Sapeta, Jana Schroth, Suresh Babu Selvaraju, Goran Stevovic, Amanda Suchanek, Andrea Throop, Lyndon Tilson, Thomas Urban, Joe Voshell, Kimberly Wagner, Jonathan Williams, Mary Williamson, Qian Zeng, Tricia Zwiefelhofer, Clinton R. Paden, Duncan MacCannell |
| EPI_ISL_1515810, EPI_ISL_1515996                                                                                                                                                                                                                                                                                                                                                                                                                                                                                                                                                                                                                                                                                                                                                                                                                                                                                                                                                                                                                                                                                                                                                                                                                                                                                                                                                                                                                                                                                                                                                                                                            | State Laboratories Division, Hawaii State Department of Health             | State Laboratories Division, Hawaii State Department of Health                            | Pamela O'Brien, Drew Kuzawaki, Ayana Garnet, Razvan Sultana, Edward Desmond                                                                                                                                                                                                                                                                                                                                                                                                                                                                                                                                                                                                                                                                                                                                                                                                                                                                                                                                                                    |
| EPI_ISL_1516197                                                                                                                                                                                                                                                                                                                                                                                                                                                                                                                                                                                                                                                                                                                                                                                                                                                                                                                                                                                                                                                                                                                                                                                                                                                                                                                                                                                                                                                                                                                                                                                                                             | TN Division of Laboratory Services                                         | Centers for Disease Control and Prevention Division of Viral Diseases, Pathogen Discovery | Mili Sheth, Sarah Nobles, Jasmine Padilla, Mark Burroughs, Shoshona Le, Katie Dillon, Peter Cook, Clinton R. Paden, Dhvani Batra, Krista Queen, Kristen Knipe, Dakota Howard, Yvette Unoarumhi, Darlene Wagner, Matthew Schmeier, Ben L. Rambo-Martin, Kristine Lacey, Sam Shepard, Alison Lauffer Halpin, Dave Wentworth, Vivien Dugan, Suxiang Tong, Justin Lee                                                                                                                                                                                                                                                                                                                                                                                                                                                                                                                                                                                                                                                                              |
| EPI_ISL_1516207, EPI_ISL_1516209, EPI_ISL_1516212                                                                                                                                                                                                                                                                                                                                                                                                                                                                                                                                                                                                                                                                                                                                                                                                                                                                                                                                                                                                                                                                                                                                                                                                                                                                                                                                                                                                                                                                                                                                                                                           | NYC Department of Health and Mental Hygiene                                | Centers for Disease Control and Prevention Division of Viral Diseases, Pathogen Discovery | Mili Sheth, Sarah Nobles, Jasmine Padilla, Mark Burroughs, Shoshona Le, Katie Dillon, Peter Cook, Clinton R. Paden, Dhvani Batra, Krista Queen, Kristen Knipe, Dakota Howard, Yvette Unoarumhi, Darlene Wagner, Matthew Schmeier, Ben L. Rambo-Martin, Kristine Lacey, Sam Shepard, Alison Lauffer Halpin, Dave Wentworth, Vivien Dugan, Suxiang Tong, Justin Lee                                                                                                                                                                                                                                                                                                                                                                                                                                                                                                                                                                                                                                                                              |
| EPI_ISL_1516269                                                                                                                                                                                                                                                                                                                                                                                                                                                                                                                                                                                                                                                                                                                                                                                                                                                                                                                                                                                                                                                                                                                                                                                                                                                                                                                                                                                                                                                                                                                                                                                                                             | SC Dept of Health and Env. Control-Bureau of Laboratories                  | Centers for Disease Control and Prevention Division of Viral Diseases, Pathogen Discovery | Mili Sheth, Sarah Nobles, Jasmine Padilla, Mark Burroughs, Shoshona Le, Katie Dillon, Peter Cook, Clinton R. Paden, Dhvani Batra, Krista Queen, Kristen Knipe, Dakota Howard, Yvette Unoarumhi, Darlene Wagner, Matthew Schmeier, Ben L. Rambo-Martin, Kristine Lacey, Sam Shepard, Alison Lauffer Halpin, Dave Wentworth, Vivien Dugan, Suxiang Tong, Justin Lee                                                                                                                                                                                                                                                                                                                                                                                                                                                                                                                                                                                                                                                                              |
| EPI_ISL_1516300                                                                                                                                                                                                                                                                                                                                                                                                                                                                                                                                                                                                                                                                                                                                                                                                                                                                                                                                                                                                                                                                                                                                                                                                                                                                                                                                                                                                                                                                                                                                                                                                                             | OK Public Health Laboratory, Oklahoma State DOH                            | Centers for Disease Control and Prevention Division of Viral Diseases, Pathogen Discovery | Mili Sheth, Sarah Nobles, Jasmine Padilla, Mark Burroughs, Shoshona Le, Katie Dillon, Peter Cook, Clinton R. Paden, Dhvani Batra, Krista Queen, Kristen Knipe, Dakota Howard, Yvette Unoarumhi, Darlene Wagner, Matthew Schmeier, Ben L. Rambo-Martin, Kristine Lacey, Sam Shepard, Alison Lauffer Halpin, Dave Wentworth, Vivien Dugan, Suxiang Tong, Justin Lee                                                                                                                                                                                                                                                                                                                                                                                                                                                                                                                                                                                                                                                                              |
| EPI_ISL_1516473, EPI_ISL_1516484, EPI_ISL_1516532, EPI_ISL_1516540, EPI_ISL_1516574, EPI_ISL_1516584, EPI_ISL_1516717                                                                                                                                                                                                                                                                                                                                                                                                                                                                                                                                                                                                                                                                                                                                                                                                                                                                                                                                                                                                                                                                                                                                                                                                                                                                                                                                                                                                                                                                                                                       | Broad Institute Clinical Research Sequencing Platform                      | Infectious Disease Program, Broad Institute of Harvard and MIT                            | Siddie,K.J., Adams,G., Pearlman,L., Gladden-Young,A., Vicente,G., Blumenstiel,B., DeFelicce,M., Lee,M., McGovern,S., Lagerborg,K., Rudy,M., DeRuff,K., Carter,A., Normandin,E., Bauer,M., Reilly,S., Tomkins-Tinch,C., Loreth,C., Chaluvadi,S., Meldrim,J., Granger,B., Lemieux,J.E., Birren,B.W., Sabeti,P.C., Larkin,K., Dodge,S., Lennon,N., Madoff,L., Brown,C., Gallagher,G., Smole,S., Park,D.J., Gabriel,S., and MacInnis,B.L.                                                                                                                                                                                                                                                                                                                                                                                                                                                                                                                                                                                                          |
| EPI_ISL_1519356                                                                                                                                                                                                                                                                                                                                                                                                                                                                                                                                                                                                                                                                                                                                                                                                                                                                                                                                                                                                                                                                                                                                                                                                                                                                                                                                                                                                                                                                                                                                                                                                                             | National Public Health Laboratory, National Centre for Infectious Diseases | National Public Health Laboratory, National Centre for Infectious Diseases                | Tze Minn Mak, Zhenyang Zhou, Grace Jie Yin Ngan, Royce Ang, Lin Cui, Raymond Tzer Pin Lin                                                                                                                                                                                                                                                                                                                                                                                                                                                                                                                                                                                                                                                                                                                                                                                                                                                                                                                                                      |
| EPI_ISL_1522072, EPI_ISL_1522073, EPI_ISL_1522122, EPI_ISL_1522131                                                                                                                                                                                                                                                                                                                                                                                                                                                                                                                                                                                                                                                                                                                                                                                                                                                                                                                                                                                                                                                                                                                                                                                                                                                                                                                                                                                                                                                                                                                                                                          | Dutch COVID-19 response team                                               | National Institute for Public Health and the Environment (RIVM)                           | Adam Meijer, Harry Vennema, Dirk Eggink, Jeroen Cremer, Sharon van den Brink, Bas van der Veer, AnneMarie van den Brandt, Lisa Wijzman, Kim Freriks, Ryanne Jaarsma, Eunice Then, Jolienke Hardeman, Lynn Aarts, Sanne Bos, Melissa van Tuil, Robert Kohl, Linda van de Nes, Sjoerd Kuling, James Groot, Florian Zwagemaker, Dennis Schmitz, Annelies Kroneman, Karim Hajji, Chantal Reusken, on behalf of the national COVID-19 response team                                                                                                                                                                                                                                                                                                                                                                                                                                                                                                                                                                                                 |
| EPI_ISL_1524801                                                                                                                                                                                                                                                                                                                                                                                                                                                                                                                                                                                                                                                                                                                                                                                                                                                                                                                                                                                                                                                                                                                                                                                                                                                                                                                                                                                                                                                                                                                                                                                                                             | National Public Health Laboratory, National Centre for Infectious Diseases | National Public Health Laboratory, National Centre for Infectious Diseases                | Tze Minn Mak, Zhenyang Zhou, Grace Jie Yin Ngan, Royce Ang, Lin Cui, Raymond Tzer Pin Lin                                                                                                                                                                                                                                                                                                                                                                                                                                                                                                                                                                                                                                                                                                                                                                                                                                                                                                                                                      |
| EPI_ISL_1524850                                                                                                                                                                                                                                                                                                                                                                                                                                                                                                                                                                                                                                                                                                                                                                                                                                                                                                                                                                                                                                                                                                                                                                                                                                                                                                                                                                                                                                                                                                                                                                                                                             | Hospital General Universitario Gregorio Marañón                            | Hospital General Universitario Gregorio Marañón                                           | Sergio Buenestado Serrano, Pedro Sola Campoy, Laura Pérez-Lago, Cristina Rodríguez-Grande, Pilar Catalán, Patricia Muñoz, Darío García de Vedra                                                                                                                                                                                                                                                                                                                                                                                                                                                                                                                                                                                                                                                                                                                                                                                                                                                                                                |
| EPI_ISL_1525019, EPI_ISL_1525020, EPI_ISL_1525022, EPI_ISL_1525028, EPI_ISL_1525029, EPI_ISL_1525038, EPI_ISL_1525043, EPI_ISL_1525046, EPI_ISL_1525057, EPI_ISL_1525062, EPI_ISL_1525068, EPI_ISL_1525080, EPI_ISL_1525112, EPI_ISL_1525151, EPI_ISL_1525182, EPI_ISL_1525206, EPI_ISL_1525207, EPI_ISL_1525219, EPI_ISL_1525236                                                                                                                                                                                                                                                                                                                                                                                                                                                                                                                                                                                                                                                                                                                                                                                                                                                                                                                                                                                                                                                                                                                                                                                                                                                                                                           |                                                                            |                                                                                           |                                                                                                                                                                                                                                                                                                                                                                                                                                                                                                                                                                                                                                                                                                                                                                                                                                                                                                                                                                                                                                                |
| see above                                                                                                                                                                                                                                                                                                                                                                                                                                                                                                                                                                                                                                                                                                                                                                                                                                                                                                                                                                                                                                                                                                                                                                                                                                                                                                                                                                                                                                                                                                                                                                                                                                   | Aegis Sciences Corporation                                                 | Centers for Disease Control and Prevention Division of Viral Diseases, Pathogen Discovery | Dakota Howard, Dhvani Batra, Peter W. Cook, Kara Moser, Adrian Paskey, Jason Caravas, Benjamin Rambo-Martin, Shatavia Morrison, Christopher Gulvick, Scott Sammons, Yvette Unoarumhi, Darlene Wagner, Matthew Schmeier, Cyndi Clark, Patrick Campbell, Rob Case, Vikramsinha Ghorpade, Holly Houdeshell, Ola Kvalvaag, Dillon Nall, Ethan Sanders, Alec Vest, Shaun Westlund, Matthew Hardison, Clinton R. Paden, Duncan MacCannell                                                                                                                                                                                                                                                                                                                                                                                                                                                                                                                                                                                                            |
| EPI_ISL_1525267, EPI_ISL_1525283, EPI_ISL_1525557, EPI_ISL_1525591, EPI_ISL_1525602, EPI_ISL_1525746,                                                                                                                                                                                                                                                                                                                                                                                                                                                                                                                                                                                                                                                                                                                                                                                                                                                                                                                                                                                                                                                                                                                                                                                                                                                                                                                                                                                                                                                                                                                                       | Fulgent Genetics                                                           | Centers for Disease Control and Prevention Division of Viral Diseases, Pathogen Discovery | Dakota Howard, Dhvani Batra, Peter W. Cook, Kara Moser, Adrian Paskey, Jason Caravas, Benjamin Rambo-Martin, Shatavia Morrison, Christopher Gulvick, Scott Sammons, Yvette Unoarumhi, Darlene Wagner, Matthew Schmeier, Harry Gao, Mickey Li, John Gao, Joseph Fierro, Benafsh Sapra, Becky Tsai, Yan Meng, Doreen Ng, James Xie, Clinton R. Paden, Duncan MacCannell                                                                                                                                                                                                                                                                                                                                                                                                                                                                                                                                                                                                                                                                          |

|                                                                                                                                                                                                                                                                                                                                                                                                                                                                                                                                                                                                                                                                                                                                                                                                                                                                                                                                                                                                                                                                                                                                                                                                                                                                                                                                                                                                                                                                                                                                                                                                                                                                                                                                                                                                                                                                                                                                                                                                                                                                                                                                                                                                                                                                                                                                                                                                                                                                                                                                                                                                                                                                                                                                                                                                                                                                                                                                                                                                                                                                                                                                                                                                                                                                                                                                                                                                                                                                                                                                                                                                                                                                                                                                                                                                                                                                                                                                                                                                                                                                                                                                                                                                                                                                                                                                                                                                                                                                                                                                                                                                                                                                                                                                                                                                                                                                                                                                                                                                                                                                                                                                                                                                                                                                                                                                                                                                                                                                                                                                         |                                                                          |                                                                                           |                                                                                                                                                                                                                                                                                                                                                                                                                                                        |
|-----------------------------------------------------------------------------------------------------------------------------------------------------------------------------------------------------------------------------------------------------------------------------------------------------------------------------------------------------------------------------------------------------------------------------------------------------------------------------------------------------------------------------------------------------------------------------------------------------------------------------------------------------------------------------------------------------------------------------------------------------------------------------------------------------------------------------------------------------------------------------------------------------------------------------------------------------------------------------------------------------------------------------------------------------------------------------------------------------------------------------------------------------------------------------------------------------------------------------------------------------------------------------------------------------------------------------------------------------------------------------------------------------------------------------------------------------------------------------------------------------------------------------------------------------------------------------------------------------------------------------------------------------------------------------------------------------------------------------------------------------------------------------------------------------------------------------------------------------------------------------------------------------------------------------------------------------------------------------------------------------------------------------------------------------------------------------------------------------------------------------------------------------------------------------------------------------------------------------------------------------------------------------------------------------------------------------------------------------------------------------------------------------------------------------------------------------------------------------------------------------------------------------------------------------------------------------------------------------------------------------------------------------------------------------------------------------------------------------------------------------------------------------------------------------------------------------------------------------------------------------------------------------------------------------------------------------------------------------------------------------------------------------------------------------------------------------------------------------------------------------------------------------------------------------------------------------------------------------------------------------------------------------------------------------------------------------------------------------------------------------------------------------------------------------------------------------------------------------------------------------------------------------------------------------------------------------------------------------------------------------------------------------------------------------------------------------------------------------------------------------------------------------------------------------------------------------------------------------------------------------------------------------------------------------------------------------------------------------------------------------------------------------------------------------------------------------------------------------------------------------------------------------------------------------------------------------------------------------------------------------------------------------------------------------------------------------------------------------------------------------------------------------------------------------------------------------------------------------------------------------------------------------------------------------------------------------------------------------------------------------------------------------------------------------------------------------------------------------------------------------------------------------------------------------------------------------------------------------------------------------------------------------------------------------------------------------------------------------------------------------------------------------------------------------------------------------------------------------------------------------------------------------------------------------------------------------------------------------------------------------------------------------------------------------------------------------------------------------------------------------------------------------------------------------------------------------------------------------------------------------------------------------------------|--------------------------------------------------------------------------|-------------------------------------------------------------------------------------------|--------------------------------------------------------------------------------------------------------------------------------------------------------------------------------------------------------------------------------------------------------------------------------------------------------------------------------------------------------------------------------------------------------------------------------------------------------|
| EPI_ISL_1525773, EPI_ISL_1525785, EPI_ISL_1525884                                                                                                                                                                                                                                                                                                                                                                                                                                                                                                                                                                                                                                                                                                                                                                                                                                                                                                                                                                                                                                                                                                                                                                                                                                                                                                                                                                                                                                                                                                                                                                                                                                                                                                                                                                                                                                                                                                                                                                                                                                                                                                                                                                                                                                                                                                                                                                                                                                                                                                                                                                                                                                                                                                                                                                                                                                                                                                                                                                                                                                                                                                                                                                                                                                                                                                                                                                                                                                                                                                                                                                                                                                                                                                                                                                                                                                                                                                                                                                                                                                                                                                                                                                                                                                                                                                                                                                                                                                                                                                                                                                                                                                                                                                                                                                                                                                                                                                                                                                                                                                                                                                                                                                                                                                                                                                                                                                                                                                                                                       |                                                                          |                                                                                           |                                                                                                                                                                                                                                                                                                                                                                                                                                                        |
| EPI_ISL_1525934, EPI_ISL_1526035, EPI_ISL_1526046, EPI_ISL_1526056                                                                                                                                                                                                                                                                                                                                                                                                                                                                                                                                                                                                                                                                                                                                                                                                                                                                                                                                                                                                                                                                                                                                                                                                                                                                                                                                                                                                                                                                                                                                                                                                                                                                                                                                                                                                                                                                                                                                                                                                                                                                                                                                                                                                                                                                                                                                                                                                                                                                                                                                                                                                                                                                                                                                                                                                                                                                                                                                                                                                                                                                                                                                                                                                                                                                                                                                                                                                                                                                                                                                                                                                                                                                                                                                                                                                                                                                                                                                                                                                                                                                                                                                                                                                                                                                                                                                                                                                                                                                                                                                                                                                                                                                                                                                                                                                                                                                                                                                                                                                                                                                                                                                                                                                                                                                                                                                                                                                                                                                      | Quest Diagnostics Incorporated                                           | Centers for Disease Control and Prevention Division of Viral Diseases, Pathogen Discovery | Dakota Howard, Dhvani Batra, Peter W. Cook, Kara Moser, Adrian Paskey, Jason Caravas, Benjamin Rambo-Martin, Shatavia Morrison, Christopher Gulvick, Scott Sammons, Yvette Unoarumhi, Darlene Wagner, Matthew Schmeier, S. H. Rosenthal, A. Gerasimova, R. M. Kagan, B. Anderson, M. Hua, Y. Liu, L.E. Bernstein, K.E. Livingston, A. Perez, I. A. Shlyakhter, R. V. Rolando, R. Owen, P. Tanpaiboon, F. Lacbawan, Clinton R. Paden, Duncan MacCannell |
| EPI_ISL_1527031, EPI_ISL_1527058                                                                                                                                                                                                                                                                                                                                                                                                                                                                                                                                                                                                                                                                                                                                                                                                                                                                                                                                                                                                                                                                                                                                                                                                                                                                                                                                                                                                                                                                                                                                                                                                                                                                                                                                                                                                                                                                                                                                                                                                                                                                                                                                                                                                                                                                                                                                                                                                                                                                                                                                                                                                                                                                                                                                                                                                                                                                                                                                                                                                                                                                                                                                                                                                                                                                                                                                                                                                                                                                                                                                                                                                                                                                                                                                                                                                                                                                                                                                                                                                                                                                                                                                                                                                                                                                                                                                                                                                                                                                                                                                                                                                                                                                                                                                                                                                                                                                                                                                                                                                                                                                                                                                                                                                                                                                                                                                                                                                                                                                                                        | University of Mississippi Medical Center, Department of Pathology        | University of Mississippi Medical Center, Molecular and Genomics Core Facility            | Ashley C. Johnson, Ithiel J. Frame, Krishna K. Ayyalasomayajula, Michael R. Garrett, D. Ashley Robinson                                                                                                                                                                                                                                                                                                                                                |
| EPI_ISL_1527121                                                                                                                                                                                                                                                                                                                                                                                                                                                                                                                                                                                                                                                                                                                                                                                                                                                                                                                                                                                                                                                                                                                                                                                                                                                                                                                                                                                                                                                                                                                                                                                                                                                                                                                                                                                                                                                                                                                                                                                                                                                                                                                                                                                                                                                                                                                                                                                                                                                                                                                                                                                                                                                                                                                                                                                                                                                                                                                                                                                                                                                                                                                                                                                                                                                                                                                                                                                                                                                                                                                                                                                                                                                                                                                                                                                                                                                                                                                                                                                                                                                                                                                                                                                                                                                                                                                                                                                                                                                                                                                                                                                                                                                                                                                                                                                                                                                                                                                                                                                                                                                                                                                                                                                                                                                                                                                                                                                                                                                                                                                         | Massachusetts State Public Health Laboratory                             | Massachusetts State Public Health Laboratory                                              | Andrew Lang, Timelia Fink, Glen Gallagher, Sandra Smole                                                                                                                                                                                                                                                                                                                                                                                                |
| EPI_ISL_1527908                                                                                                                                                                                                                                                                                                                                                                                                                                                                                                                                                                                                                                                                                                                                                                                                                                                                                                                                                                                                                                                                                                                                                                                                                                                                                                                                                                                                                                                                                                                                                                                                                                                                                                                                                                                                                                                                                                                                                                                                                                                                                                                                                                                                                                                                                                                                                                                                                                                                                                                                                                                                                                                                                                                                                                                                                                                                                                                                                                                                                                                                                                                                                                                                                                                                                                                                                                                                                                                                                                                                                                                                                                                                                                                                                                                                                                                                                                                                                                                                                                                                                                                                                                                                                                                                                                                                                                                                                                                                                                                                                                                                                                                                                                                                                                                                                                                                                                                                                                                                                                                                                                                                                                                                                                                                                                                                                                                                                                                                                                                         | Michigan Department of Health and Human Services, Bureau of Laboratories | Michigan Department of Health and Human Services, Bureau of Laboratories                  | Blankenship HM, Riner D, Soehnlén MK                                                                                                                                                                                                                                                                                                                                                                                                                   |
| EPI_ISL_1528247                                                                                                                                                                                                                                                                                                                                                                                                                                                                                                                                                                                                                                                                                                                                                                                                                                                                                                                                                                                                                                                                                                                                                                                                                                                                                                                                                                                                                                                                                                                                                                                                                                                                                                                                                                                                                                                                                                                                                                                                                                                                                                                                                                                                                                                                                                                                                                                                                                                                                                                                                                                                                                                                                                                                                                                                                                                                                                                                                                                                                                                                                                                                                                                                                                                                                                                                                                                                                                                                                                                                                                                                                                                                                                                                                                                                                                                                                                                                                                                                                                                                                                                                                                                                                                                                                                                                                                                                                                                                                                                                                                                                                                                                                                                                                                                                                                                                                                                                                                                                                                                                                                                                                                                                                                                                                                                                                                                                                                                                                                                         | IN State Department of Health Laboratory Services                        | IN State Department of Health Laboratory Services                                         | Cassandra Campion, Jamie Yeardon, Brian Pope, Lixia Liu, Kyle Brownlee, Melissa Hindenlang, Ankita Kashikar, Mark Glazier                                                                                                                                                                                                                                                                                                                              |
| EPI_ISL_1528275                                                                                                                                                                                                                                                                                                                                                                                                                                                                                                                                                                                                                                                                                                                                                                                                                                                                                                                                                                                                                                                                                                                                                                                                                                                                                                                                                                                                                                                                                                                                                                                                                                                                                                                                                                                                                                                                                                                                                                                                                                                                                                                                                                                                                                                                                                                                                                                                                                                                                                                                                                                                                                                                                                                                                                                                                                                                                                                                                                                                                                                                                                                                                                                                                                                                                                                                                                                                                                                                                                                                                                                                                                                                                                                                                                                                                                                                                                                                                                                                                                                                                                                                                                                                                                                                                                                                                                                                                                                                                                                                                                                                                                                                                                                                                                                                                                                                                                                                                                                                                                                                                                                                                                                                                                                                                                                                                                                                                                                                                                                         | VA-Division of Consolidated Laboratory Services                          | Centers for Disease Control and Prevention Division of Viral Diseases, Pathogen Discovery | Mili Sheth, Sarah Nobles, Jasmine Padilla, Mark Burroughs, Shoshona Le, Katie Dillon, Peter Cook, Clinton R. Paden, Dhvani Batra, Krista Queen, Kristen Knipe, Dakota Howard, Yvette Unoarumhi, Darlene Wagner, Matthew Schmeier, Ben L. Rambo-Martin, Kristine Lacek, Sam Shepard, Alison Laufer Halpin, Dave Wentworth, Vivien Dugan, Suxiang Tong, Justin Lee                                                                                       |
| EPI_ISL_1528326, EPI_ISL_1528330, EPI_ISL_1528332, EPI_ISL_1528338                                                                                                                                                                                                                                                                                                                                                                                                                                                                                                                                                                                                                                                                                                                                                                                                                                                                                                                                                                                                                                                                                                                                                                                                                                                                                                                                                                                                                                                                                                                                                                                                                                                                                                                                                                                                                                                                                                                                                                                                                                                                                                                                                                                                                                                                                                                                                                                                                                                                                                                                                                                                                                                                                                                                                                                                                                                                                                                                                                                                                                                                                                                                                                                                                                                                                                                                                                                                                                                                                                                                                                                                                                                                                                                                                                                                                                                                                                                                                                                                                                                                                                                                                                                                                                                                                                                                                                                                                                                                                                                                                                                                                                                                                                                                                                                                                                                                                                                                                                                                                                                                                                                                                                                                                                                                                                                                                                                                                                                                      | NJ Public Health and Environmental Laboratories                          | Centers for Disease Control and Prevention Division of Viral Diseases, Pathogen Discovery | Mili Sheth, Sarah Nobles, Jasmine Padilla, Mark Burroughs, Shoshona Le, Katie Dillon, Peter Cook, Clinton R. Paden, Dhvani Batra, Krista Queen, Kristen Knipe, Dakota Howard, Yvette Unoarumhi, Darlene Wagner, Matthew Schmeier, Ben L. Rambo-Martin, Kristine Lacek, Sam Shepard, Alison Laufer Halpin, Dave Wentworth, Vivien Dugan, Suxiang Tong, Justin Lee                                                                                       |
| EPI_ISL_1528413                                                                                                                                                                                                                                                                                                                                                                                                                                                                                                                                                                                                                                                                                                                                                                                                                                                                                                                                                                                                                                                                                                                                                                                                                                                                                                                                                                                                                                                                                                                                                                                                                                                                                                                                                                                                                                                                                                                                                                                                                                                                                                                                                                                                                                                                                                                                                                                                                                                                                                                                                                                                                                                                                                                                                                                                                                                                                                                                                                                                                                                                                                                                                                                                                                                                                                                                                                                                                                                                                                                                                                                                                                                                                                                                                                                                                                                                                                                                                                                                                                                                                                                                                                                                                                                                                                                                                                                                                                                                                                                                                                                                                                                                                                                                                                                                                                                                                                                                                                                                                                                                                                                                                                                                                                                                                                                                                                                                                                                                                                                         | MS Public Health Laboratory                                              | Centers for Disease Control and Prevention Division of Viral Diseases, Pathogen Discovery | Mili Sheth, Sarah Nobles, Jasmine Padilla, Mark Burroughs, Shoshona Le, Katie Dillon, Peter Cook, Clinton R. Paden, Dhvani Batra, Krista Queen, Kristen Knipe, Dakota Howard, Yvette Unoarumhi, Darlene Wagner, Matthew Schmeier, Ben L. Rambo-Martin, Kristine Lacek, Sam Shepard, Alison Laufer Halpin, Dave Wentworth, Vivien Dugan, Suxiang Tong, Justin Lee                                                                                       |
| EPI_ISL_1528427                                                                                                                                                                                                                                                                                                                                                                                                                                                                                                                                                                                                                                                                                                                                                                                                                                                                                                                                                                                                                                                                                                                                                                                                                                                                                                                                                                                                                                                                                                                                                                                                                                                                                                                                                                                                                                                                                                                                                                                                                                                                                                                                                                                                                                                                                                                                                                                                                                                                                                                                                                                                                                                                                                                                                                                                                                                                                                                                                                                                                                                                                                                                                                                                                                                                                                                                                                                                                                                                                                                                                                                                                                                                                                                                                                                                                                                                                                                                                                                                                                                                                                                                                                                                                                                                                                                                                                                                                                                                                                                                                                                                                                                                                                                                                                                                                                                                                                                                                                                                                                                                                                                                                                                                                                                                                                                                                                                                                                                                                                                         | IN State Department of Health Laboratory Services                        | Centers for Disease Control and Prevention Division of Viral Diseases, Pathogen Discovery | Mili Sheth, Sarah Nobles, Jasmine Padilla, Mark Burroughs, Shoshona Le, Katie Dillon, Peter Cook, Clinton R. Paden, Dhvani Batra, Krista Queen, Kristen Knipe, Dakota Howard, Yvette Unoarumhi, Darlene Wagner, Matthew Schmeier, Ben L. Rambo-Martin, Kristine Lacek, Sam Shepard, Alison Laufer Halpin, Dave Wentworth, Vivien Dugan, Suxiang Tong, Justin Lee                                                                                       |
| EPI_ISL_1530665                                                                                                                                                                                                                                                                                                                                                                                                                                                                                                                                                                                                                                                                                                                                                                                                                                                                                                                                                                                                                                                                                                                                                                                                                                                                                                                                                                                                                                                                                                                                                                                                                                                                                                                                                                                                                                                                                                                                                                                                                                                                                                                                                                                                                                                                                                                                                                                                                                                                                                                                                                                                                                                                                                                                                                                                                                                                                                                                                                                                                                                                                                                                                                                                                                                                                                                                                                                                                                                                                                                                                                                                                                                                                                                                                                                                                                                                                                                                                                                                                                                                                                                                                                                                                                                                                                                                                                                                                                                                                                                                                                                                                                                                                                                                                                                                                                                                                                                                                                                                                                                                                                                                                                                                                                                                                                                                                                                                                                                                                                                         | Sonora Quest Laboratories                                                | TGen North                                                                                | Jolene Bowers, Heather Centner, Chris French, Hayley Yaglom, Ashlyn Pfeiffer, Darrin Lemmer, Dave Engelthaler, The Arizona COVID Genomics Union (ACGU)                                                                                                                                                                                                                                                                                                 |
| EPI_ISL_1530879, EPI_ISL_1530892, EPI_ISL_1530920, EPI_ISL_1530925, EPI_ISL_1530929, EPI_ISL_1530930, EPI_ISL_1530936                                                                                                                                                                                                                                                                                                                                                                                                                                                                                                                                                                                                                                                                                                                                                                                                                                                                                                                                                                                                                                                                                                                                                                                                                                                                                                                                                                                                                                                                                                                                                                                                                                                                                                                                                                                                                                                                                                                                                                                                                                                                                                                                                                                                                                                                                                                                                                                                                                                                                                                                                                                                                                                                                                                                                                                                                                                                                                                                                                                                                                                                                                                                                                                                                                                                                                                                                                                                                                                                                                                                                                                                                                                                                                                                                                                                                                                                                                                                                                                                                                                                                                                                                                                                                                                                                                                                                                                                                                                                                                                                                                                                                                                                                                                                                                                                                                                                                                                                                                                                                                                                                                                                                                                                                                                                                                                                                                                                                   | NJDOH, Public Health and Environmental Laboratories                      | New Jersey Public Health and Environmental Laboratories (NJPHL)                           | Lindsey Bodnar, Shiv K. Verma, Jacquelyn Deverell, Matthew Scarnati, Mohammad M Ali, Dana Woell, Byeong Jeong                                                                                                                                                                                                                                                                                                                                          |
| EPI_ISL_1531089, EPI_ISL_1531110                                                                                                                                                                                                                                                                                                                                                                                                                                                                                                                                                                                                                                                                                                                                                                                                                                                                                                                                                                                                                                                                                                                                                                                                                                                                                                                                                                                                                                                                                                                                                                                                                                                                                                                                                                                                                                                                                                                                                                                                                                                                                                                                                                                                                                                                                                                                                                                                                                                                                                                                                                                                                                                                                                                                                                                                                                                                                                                                                                                                                                                                                                                                                                                                                                                                                                                                                                                                                                                                                                                                                                                                                                                                                                                                                                                                                                                                                                                                                                                                                                                                                                                                                                                                                                                                                                                                                                                                                                                                                                                                                                                                                                                                                                                                                                                                                                                                                                                                                                                                                                                                                                                                                                                                                                                                                                                                                                                                                                                                                                        | Florida Bureau of Public Health Laboratories                             | Florida Bureau of Public Health Laboratories                                              | Sarah Schmedes, Jason Blanton                                                                                                                                                                                                                                                                                                                                                                                                                          |
| EPI_ISL_1531645                                                                                                                                                                                                                                                                                                                                                                                                                                                                                                                                                                                                                                                                                                                                                                                                                                                                                                                                                                                                                                                                                                                                                                                                                                                                                                                                                                                                                                                                                                                                                                                                                                                                                                                                                                                                                                                                                                                                                                                                                                                                                                                                                                                                                                                                                                                                                                                                                                                                                                                                                                                                                                                                                                                                                                                                                                                                                                                                                                                                                                                                                                                                                                                                                                                                                                                                                                                                                                                                                                                                                                                                                                                                                                                                                                                                                                                                                                                                                                                                                                                                                                                                                                                                                                                                                                                                                                                                                                                                                                                                                                                                                                                                                                                                                                                                                                                                                                                                                                                                                                                                                                                                                                                                                                                                                                                                                                                                                                                                                                                         | M Health Fairview                                                        | Minnesota Department of Health, Public Health Laboratory                                  | Alexandra Lorentz, Jacob Garfin, Matt Plumb, and Xiong Wang                                                                                                                                                                                                                                                                                                                                                                                            |
| EPI_ISL_1531746, EPI_ISL_1531763                                                                                                                                                                                                                                                                                                                                                                                                                                                                                                                                                                                                                                                                                                                                                                                                                                                                                                                                                                                                                                                                                                                                                                                                                                                                                                                                                                                                                                                                                                                                                                                                                                                                                                                                                                                                                                                                                                                                                                                                                                                                                                                                                                                                                                                                                                                                                                                                                                                                                                                                                                                                                                                                                                                                                                                                                                                                                                                                                                                                                                                                                                                                                                                                                                                                                                                                                                                                                                                                                                                                                                                                                                                                                                                                                                                                                                                                                                                                                                                                                                                                                                                                                                                                                                                                                                                                                                                                                                                                                                                                                                                                                                                                                                                                                                                                                                                                                                                                                                                                                                                                                                                                                                                                                                                                                                                                                                                                                                                                                                        | University of Oregon COVID-19 MAP Laboratory                             | University of Oregon Genomics and Cell Characterization Core Facility (GC3F)              | Douglas Turnbull, Ariana White, Jeff Bishop, Jason Carriere                                                                                                                                                                                                                                                                                                                                                                                            |
| EPI_ISL_1532128                                                                                                                                                                                                                                                                                                                                                                                                                                                                                                                                                                                                                                                                                                                                                                                                                                                                                                                                                                                                                                                                                                                                                                                                                                                                                                                                                                                                                                                                                                                                                                                                                                                                                                                                                                                                                                                                                                                                                                                                                                                                                                                                                                                                                                                                                                                                                                                                                                                                                                                                                                                                                                                                                                                                                                                                                                                                                                                                                                                                                                                                                                                                                                                                                                                                                                                                                                                                                                                                                                                                                                                                                                                                                                                                                                                                                                                                                                                                                                                                                                                                                                                                                                                                                                                                                                                                                                                                                                                                                                                                                                                                                                                                                                                                                                                                                                                                                                                                                                                                                                                                                                                                                                                                                                                                                                                                                                                                                                                                                                                         | Santa Clara Valley Medical Center                                        | Santa Clara County Public Health Laboratory                                               | Santa Clara County Public Health Department                                                                                                                                                                                                                                                                                                                                                                                                            |
| EPI_ISL_1532732, EPI_ISL_1532737, EPI_ISL_1532739, EPI_ISL_1532740, EPI_ISL_1532754, EPI_ISL_1532761, EPI_ISL_1532770, EPI_ISL_1532776, EPI_ISL_1532778, EPI_ISL_1532781                                                                                                                                                                                                                                                                                                                                                                                                                                                                                                                                                                                                                                                                                                                                                                                                                                                                                                                                                                                                                                                                                                                                                                                                                                                                                                                                                                                                                                                                                                                                                                                                                                                                                                                                                                                                                                                                                                                                                                                                                                                                                                                                                                                                                                                                                                                                                                                                                                                                                                                                                                                                                                                                                                                                                                                                                                                                                                                                                                                                                                                                                                                                                                                                                                                                                                                                                                                                                                                                                                                                                                                                                                                                                                                                                                                                                                                                                                                                                                                                                                                                                                                                                                                                                                                                                                                                                                                                                                                                                                                                                                                                                                                                                                                                                                                                                                                                                                                                                                                                                                                                                                                                                                                                                                                                                                                                                                | NYU Langone Health                                                       | Departments of Pathology and Medicine, New York University School of Medicine             | Adriana Heguy, Dacia Dimartino, Emily Guzman, Christian Marier, Peter Meyn, Sitharam Ramaswami, Gael Westby, Paul Zapple, Yutong Zhang, Paolo Cotzia, Guiqing Wang                                                                                                                                                                                                                                                                                     |
| EPI_ISL_1534526                                                                                                                                                                                                                                                                                                                                                                                                                                                                                                                                                                                                                                                                                                                                                                                                                                                                                                                                                                                                                                                                                                                                                                                                                                                                                                                                                                                                                                                                                                                                                                                                                                                                                                                                                                                                                                                                                                                                                                                                                                                                                                                                                                                                                                                                                                                                                                                                                                                                                                                                                                                                                                                                                                                                                                                                                                                                                                                                                                                                                                                                                                                                                                                                                                                                                                                                                                                                                                                                                                                                                                                                                                                                                                                                                                                                                                                                                                                                                                                                                                                                                                                                                                                                                                                                                                                                                                                                                                                                                                                                                                                                                                                                                                                                                                                                                                                                                                                                                                                                                                                                                                                                                                                                                                                                                                                                                                                                                                                                                                                         | Ministry of Health Turkey                                                | Ministry of Health Turkey                                                                 | Fatma Bayraktar, Yasemin Cosgun, Suleyman Yalcin, Gulay Korukluoglu                                                                                                                                                                                                                                                                                                                                                                                    |
| EPI_ISL_1540721, EPI_ISL_1540722, EPI_ISL_1540723, EPI_ISL_1540733, EPI_ISL_1540734, EPI_ISL_1540736, EPI_ISL_1540747, EPI_ISL_1540750, EPI_ISL_1540757, EPI_ISL_1540759, EPI_ISL_1540761, EPI_ISL_1540768, EPI_ISL_1540771, EPI_ISL_1540774, EPI_ISL_1540775, EPI_ISL_1540777, EPI_ISL_1540782, EPI_ISL_1540783, EPI_ISL_1540785, EPI_ISL_1540790, EPI_ISL_1540794, EPI_ISL_1540798, EPI_ISL_1540801, EPI_ISL_1540805, EPI_ISL_1540806, EPI_ISL_1540811, EPI_ISL_1540827, EPI_ISL_1540828, EPI_ISL_1540829, EPI_ISL_1540847, EPI_ISL_1540848, EPI_ISL_1540849, EPI_ISL_1540851, EPI_ISL_1540852                                                                                                                                                                                                                                                                                                                                                                                                                                                                                                                                                                                                                                                                                                                                                                                                                                                                                                                                                                                                                                                                                                                                                                                                                                                                                                                                                                                                                                                                                                                                                                                                                                                                                                                                                                                                                                                                                                                                                                                                                                                                                                                                                                                                                                                                                                                                                                                                                                                                                                                                                                                                                                                                                                                                                                                                                                                                                                                                                                                                                                                                                                                                                                                                                                                                                                                                                                                                                                                                                                                                                                                                                                                                                                                                                                                                                                                                                                                                                                                                                                                                                                                                                                                                                                                                                                                                                                                                                                                                                                                                                                                                                                                                                                                                                                                                                                                                                                                                        |                                                                          |                                                                                           |                                                                                                                                                                                                                                                                                                                                                                                                                                                        |
| see above                                                                                                                                                                                                                                                                                                                                                                                                                                                                                                                                                                                                                                                                                                                                                                                                                                                                                                                                                                                                                                                                                                                                                                                                                                                                                                                                                                                                                                                                                                                                                                                                                                                                                                                                                                                                                                                                                                                                                                                                                                                                                                                                                                                                                                                                                                                                                                                                                                                                                                                                                                                                                                                                                                                                                                                                                                                                                                                                                                                                                                                                                                                                                                                                                                                                                                                                                                                                                                                                                                                                                                                                                                                                                                                                                                                                                                                                                                                                                                                                                                                                                                                                                                                                                                                                                                                                                                                                                                                                                                                                                                                                                                                                                                                                                                                                                                                                                                                                                                                                                                                                                                                                                                                                                                                                                                                                                                                                                                                                                                                               | The Jackson Laboratory                                                   | The Jackson Laboratory                                                                    | Bergeron D, Renzette N, Adams M, Omerza G, Kelly K, Long J, Li L                                                                                                                                                                                                                                                                                                                                                                                       |
| EPI_ISL_1540973, EPI_ISL_1540974, EPI_ISL_1541188                                                                                                                                                                                                                                                                                                                                                                                                                                                                                                                                                                                                                                                                                                                                                                                                                                                                                                                                                                                                                                                                                                                                                                                                                                                                                                                                                                                                                                                                                                                                                                                                                                                                                                                                                                                                                                                                                                                                                                                                                                                                                                                                                                                                                                                                                                                                                                                                                                                                                                                                                                                                                                                                                                                                                                                                                                                                                                                                                                                                                                                                                                                                                                                                                                                                                                                                                                                                                                                                                                                                                                                                                                                                                                                                                                                                                                                                                                                                                                                                                                                                                                                                                                                                                                                                                                                                                                                                                                                                                                                                                                                                                                                                                                                                                                                                                                                                                                                                                                                                                                                                                                                                                                                                                                                                                                                                                                                                                                                                                       | Pathology and Laboratory Medicine Institute, Cleveland Clinic, Ohio, USA | Pathology and Laboratory Medicine Institute, Cleveland Clinic, Ohio, USA                  | Joy Nakitandwe, Zheng Jin Tu, Jay Brock, Yu-Wei Cheng, Gary Procop, Daniel Rhoads, Daniel H. Farkas, David Bosler                                                                                                                                                                                                                                                                                                                                      |
| EPI_ISL_1542074, EPI_ISL_1542075, EPI_ISL_1542085, EPI_ISL_1542088, EPI_ISL_1542090, EPI_ISL_1542091, EPI_ISL_1542101, EPI_ISL_1542104, EPI_ISL_1542106, EPI_ISL_1542111, EPI_ISL_1542113, EPI_ISL_1542123, EPI_ISL_1542125, EPI_ISL_1542129, EPI_ISL_1542132, EPI_ISL_1542133, EPI_ISL_1542146, EPI_ISL_1542152, EPI_ISL_1542167, EPI_ISL_1542174, EPI_ISL_1542183, EPI_ISL_1542189, EPI_ISL_1542190, EPI_ISL_1542203, EPI_ISL_1542208, EPI_ISL_1542211, EPI_ISL_1542215, EPI_ISL_1542219, EPI_ISL_1542222, EPI_ISL_1542237, EPI_ISL_1542240, EPI_ISL_1542253, EPI_ISL_1542256, EPI_ISL_1542265, EPI_ISL_1542269, EPI_ISL_1542275, EPI_ISL_1542276, EPI_ISL_1542277, EPI_ISL_1542279, EPI_ISL_1542282, EPI_ISL_1542285, EPI_ISL_1542287, EPI_ISL_1542288, EPI_ISL_1542296, EPI_ISL_1542299, EPI_ISL_1542305, EPI_ISL_1542308, EPI_ISL_1542311, EPI_ISL_1542312, EPI_ISL_1542317, EPI_ISL_1542321, EPI_ISL_1542327, EPI_ISL_1542332, EPI_ISL_1542336, EPI_ISL_1542346, EPI_ISL_1542347, EPI_ISL_1542349, EPI_ISL_1542353, EPI_ISL_1542364, EPI_ISL_1542368, EPI_ISL_1542369, EPI_ISL_1542371, EPI_ISL_1542378, EPI_ISL_1542387, EPI_ISL_1542392, EPI_ISL_1542396, EPI_ISL_1542413, EPI_ISL_1542419, EPI_ISL_1542422, EPI_ISL_1542426, EPI_ISL_1542431, EPI_ISL_1542433, EPI_ISL_1542434, EPI_ISL_1542436, EPI_ISL_1542446, EPI_ISL_1542461, EPI_ISL_1542463, EPI_ISL_1542465, EPI_ISL_1542466, EPI_ISL_1542468, EPI_ISL_1542477, EPI_ISL_1542482, EPI_ISL_1542486, EPI_ISL_1542495, EPI_ISL_1542496, EPI_ISL_1542498, EPI_ISL_1542501, EPI_ISL_1542502, EPI_ISL_1542506, EPI_ISL_1542531, EPI_ISL_1542539, EPI_ISL_1542543, EPI_ISL_1542548, EPI_ISL_1542555, EPI_ISL_1542567, EPI_ISL_1542575, EPI_ISL_1542587, EPI_ISL_1542589, EPI_ISL_1542590, EPI_ISL_1542592, EPI_ISL_1542595, EPI_ISL_1542598, EPI_ISL_1542621, EPI_ISL_1542623, EPI_ISL_1542636, EPI_ISL_1542637, EPI_ISL_1542641, EPI_ISL_1542645, EPI_ISL_1542649, EPI_ISL_1542659, EPI_ISL_1542668, EPI_ISL_1542670, EPI_ISL_1542675, EPI_ISL_1542678, EPI_ISL_1542682, EPI_ISL_1542689, EPI_ISL_1542706, EPI_ISL_1542709, EPI_ISL_1542717, EPI_ISL_1542723, EPI_ISL_1542736, EPI_ISL_1542738, EPI_ISL_1542743, EPI_ISL_1542755, EPI_ISL_1542757, EPI_ISL_1542762, EPI_ISL_1542773, EPI_ISL_1542776, EPI_ISL_1542777, EPI_ISL_1542779, EPI_ISL_1542787, EPI_ISL_1542794, EPI_ISL_1542801, EPI_ISL_1542802, EPI_ISL_1542805, EPI_ISL_1542811, EPI_ISL_1542814, EPI_ISL_1542821, EPI_ISL_1542822, EPI_ISL_1542823, EPI_ISL_1542826, EPI_ISL_1542835, EPI_ISL_1542836, EPI_ISL_1542837, EPI_ISL_1542838, EPI_ISL_1542840, EPI_ISL_1542844, EPI_ISL_1542863, EPI_ISL_1542868, EPI_ISL_1542882, EPI_ISL_1542884, EPI_ISL_1542891, EPI_ISL_1542922, EPI_ISL_1542928, EPI_ISL_1542934, EPI_ISL_1542935, EPI_ISL_1542940, EPI_ISL_1542957, EPI_ISL_1542958, EPI_ISL_1542967, EPI_ISL_1542972, EPI_ISL_1542973, EPI_ISL_1542977, EPI_ISL_1542987, EPI_ISL_1542988, EPI_ISL_1542993, EPI_ISL_1542998, EPI_ISL_1543001, EPI_ISL_1543011, EPI_ISL_1543014, EPI_ISL_1543017, EPI_ISL_1543020, EPI_ISL_1543033, EPI_ISL_1543039, EPI_ISL_1543041, EPI_ISL_1543043, EPI_ISL_1543044, EPI_ISL_1543050, EPI_ISL_1543051, EPI_ISL_1543064, EPI_ISL_1543068, EPI_ISL_1543080, EPI_ISL_1543087, EPI_ISL_1543094, EPI_ISL_1543095, EPI_ISL_1543096, EPI_ISL_1543104, EPI_ISL_1543106, EPI_ISL_1543111, EPI_ISL_1543112, EPI_ISL_1543116, EPI_ISL_1543128, EPI_ISL_1543131, EPI_ISL_1543135, EPI_ISL_1543152, EPI_ISL_1543154, EPI_ISL_1543157, EPI_ISL_1543161, EPI_ISL_1543168, EPI_ISL_1543169, EPI_ISL_1543174, EPI_ISL_1543183, EPI_ISL_1543184, EPI_ISL_1543192, EPI_ISL_1543193, EPI_ISL_1543198, EPI_ISL_1543210, EPI_ISL_1543221, EPI_ISL_1543222, EPI_ISL_1543226, EPI_ISL_1543232, EPI_ISL_1543234, EPI_ISL_1543235, EPI_ISL_1543242, EPI_ISL_1543250, EPI_ISL_1543253, EPI_ISL_1543261, EPI_ISL_1543265, EPI_ISL_1543269, EPI_ISL_1543272, EPI_ISL_1543276, EPI_ISL_1543285, EPI_ISL_1543286, EPI_ISL_1543291, EPI_ISL_1543300, EPI_ISL_1543302, EPI_ISL_1543304, EPI_ISL_1543309, EPI_ISL_1543319, EPI_ISL_1543326, EPI_ISL_1543329, EPI_ISL_1543333, EPI_ISL_1543334, EPI_ISL_1543339, EPI_ISL_1543348, EPI_ISL_1543356, EPI_ISL_1543369, EPI_ISL_1543373, EPI_ISL_1543374, EPI_ISL_1543383, EPI_ISL_1543384, EPI_ISL_1543388, EPI_ISL_1543389, EPI_ISL_1543401, EPI_ISL_1543404, EPI_ISL_1543406, EPI_ISL_1543469, EPI_ISL_1543476, EPI_ISL_1543478, EPI_ISL_1543482, EPI_ISL_1543489, EPI_ISL_1543499, EPI_ISL_1543500, EPI_ISL_1543503, EPI_ISL_1543504, EPI_ISL_1543505, EPI_ISL_1543515, EPI_ISL_1543516, EPI_ISL_1543516, EPI_ISL_1543626, EPI_ISL_1543626, EPI_ISL_1543637, EPI_ISL_1543643, EPI_ISL_1543650, EPI_ISL_1543652, EPI_ISL_1543658, EPI_ISL_1543666, EPI_ISL_1543671, EPI_ISL_1543682, EPI_ISL_1543687, EPI_ISL_1543707, EPI_ISL_1543712, EPI_ISL_1543713, EPI_ISL_1543714, EPI_ISL_1543718, EPI_ISL_1543722, EPI_ISL_1543730, EPI_ISL_1543736, EPI_ISL_1543738, EPI_ISL_1543742, EPI_ISL_1543745, EPI_ISL_1543750, EPI_ISL_1543760, EPI_ISL_1543765, EPI_ISL_1543767, EPI_ISL_1543771, EPI_ISL_1543776, EPI_ISL_1543777, EPI_ISL_1543783, EPI_ISL_1543784, EPI_ISL_1543800, EPI_ISL_1543805, EPI_ISL_1543812, EPI_ISL_1543815, EPI_ISL_1543816, EPI_ISL_1543819, EPI_ISL_1543824, EPI_ISL_1543831, EPI_ISL_1543834, EPI_ISL_1543835, EPI_ISL_1543844, EPI_ISL_1543849, EPI_ISL_1543859, EPI_ISL_1543860, EPI_ISL_1543861, EPI_ISL_1543883, EPI_ISL_1543884, EPI_ISL_1543890, EPI_ISL_1543905, EPI_ISL_1543910, EPI_ISL_1543917, EPI_ISL_1543918, EPI_ISL_1543920 |                                                                          |                                                                                           |                                                                                                                                                                                                                                                                                                                                                                                                                                                        |
| see above                                                                                                                                                                                                                                                                                                                                                                                                                                                                                                                                                                                                                                                                                                                                                                                                                                                                                                                                                                                                                                                                                                                                                                                                                                                                                                                                                                                                                                                                                                                                                                                                                                                                                                                                                                                                                                                                                                                                                                                                                                                                                                                                                                                                                                                                                                                                                                                                                                                                                                                                                                                                                                                                                                                                                                                                                                                                                                                                                                                                                                                                                                                                                                                                                                                                                                                                                                                                                                                                                                                                                                                                                                                                                                                                                                                                                                                                                                                                                                                                                                                                                                                                                                                                                                                                                                                                                                                                                                                                                                                                                                                                                                                                                                                                                                                                                                                                                                                                                                                                                                                                                                                                                                                                                                                                                                                                                                                                                                                                                                                               | Pandemic Response Lab - NYC                                              | Pandemic Response Lab, R&D                                                                | Henry Lee, Michael Hammerling, Melissa Hopkins, Cybill del Castillo, Shinyoung Clair Kang, William Ward, Pradeep Bugga, Sol Rey, Dylan Law, Katharine Nelson, Haiping Hao, Jon Laurent                                                                                                                                                                                                                                                                 |
| EPI_ISL_1559340, EPI_ISL_1559358                                                                                                                                                                                                                                                                                                                                                                                                                                                                                                                                                                                                                                                                                                                                                                                                                                                                                                                                                                                                                                                                                                                                                                                                                                                                                                                                                                                                                                                                                                                                                                                                                                                                                                                                                                                                                                                                                                                                                                                                                                                                                                                                                                                                                                                                                                                                                                                                                                                                                                                                                                                                                                                                                                                                                                                                                                                                                                                                                                                                                                                                                                                                                                                                                                                                                                                                                                                                                                                                                                                                                                                                                                                                                                                                                                                                                                                                                                                                                                                                                                                                                                                                                                                                                                                                                                                                                                                                                                                                                                                                                                                                                                                                                                                                                                                                                                                                                                                                                                                                                                                                                                                                                                                                                                                                                                                                                                                                                                                                                                        | NJDOH, Public Health and Environmental Laboratories                      | NJ_PHEL                                                                                   | Lindsey Bodnar, Shiv K. Verma, Jacquelyn Deverell, Matthew Scarnati, Mohammad M Ali, Dana Woell, Byeong Jeong                                                                                                                                                                                                                                                                                                                                          |
| EPI_ISL_1559422, EPI_ISL_1559441, EPI_ISL_1559514, EPI_ISL_1559541                                                                                                                                                                                                                                                                                                                                                                                                                                                                                                                                                                                                                                                                                                                                                                                                                                                                                                                                                                                                                                                                                                                                                                                                                                                                                                                                                                                                                                                                                                                                                                                                                                                                                                                                                                                                                                                                                                                                                                                                                                                                                                                                                                                                                                                                                                                                                                                                                                                                                                                                                                                                                                                                                                                                                                                                                                                                                                                                                                                                                                                                                                                                                                                                                                                                                                                                                                                                                                                                                                                                                                                                                                                                                                                                                                                                                                                                                                                                                                                                                                                                                                                                                                                                                                                                                                                                                                                                                                                                                                                                                                                                                                                                                                                                                                                                                                                                                                                                                                                                                                                                                                                                                                                                                                                                                                                                                                                                                                                                      | Quest Diagnostics Incorporated                                           | Centers for Disease Control and Prevention Division of Viral Diseases, Pathogen Discovery | Dakota Howard, Dhvani Batra, Peter W. Cook, Kara Moser, Adrian Paskey, Jason Caravas, Benjamin Rambo-Martin, Shatavia Morrison, Christopher Gulvick, Scott Sammons, Yvette Unoarumhi, Darlene Wagner, Matthew Schmeier, S. H. Rosenthal, A. Gerasimova, R. M. Kagan, B. Anderson, M. Hua, Y. Liu, L.E. Bernstein, K.E. Livingston, A. Perez, I. A. Shlyakhter, R. V. Rolando, R. Owen, P. Tanpaiboon, F. Lacbawan, Clinton R. Paden, Duncan MacCannell |
| EPI_ISL_1559631, EPI_ISL_1559633, EPI_ISL_1559640, EPI_ISL_1559658, EPI_ISL_1559675, EPI_ISL_1559678, EPI_ISL_1559679, EPI_ISL_1559688, EPI_ISL_1559705, EPI_ISL_1559706, EPI_ISL_1559710, EPI_ISL_1559718, EPI_ISL_1559787, EPI_ISL_1559796, EPI_ISL_1559797, EPI_ISL_1559814, EPI_ISL_1559821,                                                                                                                                                                                                                                                                                                                                                                                                                                                                                                                                                                                                                                                                                                                                                                                                                                                                                                                                                                                                                                                                                                                                                                                                                                                                                                                                                                                                                                                                                                                                                                                                                                                                                                                                                                                                                                                                                                                                                                                                                                                                                                                                                                                                                                                                                                                                                                                                                                                                                                                                                                                                                                                                                                                                                                                                                                                                                                                                                                                                                                                                                                                                                                                                                                                                                                                                                                                                                                                                                                                                                                                                                                                                                                                                                                                                                                                                                                                                                                                                                                                                                                                                                                                                                                                                                                                                                                                                                                                                                                                                                                                                                                                                                                                                                                                                                                                                                                                                                                                                                                                                                                                                                                                                                                        |                                                                          |                                                                                           |                                                                                                                                                                                                                                                                                                                                                                                                                                                        |

|                                                                                                                                                                                                                                                                                                                                                                                                                                                                                                                                                                                                                                                                                                                                                                                                                                                                                                                                                                                                                                                                                                                                                                                                                                                                                                                                                                                                                                                                                                                                                                                                                                                                                                                                                                                                                                                                                                                                                                                                                                                                                                       |                                                       |                                                                                           |                                                                                                                                                                                                                                                                                                                                                                                                                                                                                                                                                                                                                                                                                                                         |  |
|-------------------------------------------------------------------------------------------------------------------------------------------------------------------------------------------------------------------------------------------------------------------------------------------------------------------------------------------------------------------------------------------------------------------------------------------------------------------------------------------------------------------------------------------------------------------------------------------------------------------------------------------------------------------------------------------------------------------------------------------------------------------------------------------------------------------------------------------------------------------------------------------------------------------------------------------------------------------------------------------------------------------------------------------------------------------------------------------------------------------------------------------------------------------------------------------------------------------------------------------------------------------------------------------------------------------------------------------------------------------------------------------------------------------------------------------------------------------------------------------------------------------------------------------------------------------------------------------------------------------------------------------------------------------------------------------------------------------------------------------------------------------------------------------------------------------------------------------------------------------------------------------------------------------------------------------------------------------------------------------------------------------------------------------------------------------------------------------------------|-------------------------------------------------------|-------------------------------------------------------------------------------------------|-------------------------------------------------------------------------------------------------------------------------------------------------------------------------------------------------------------------------------------------------------------------------------------------------------------------------------------------------------------------------------------------------------------------------------------------------------------------------------------------------------------------------------------------------------------------------------------------------------------------------------------------------------------------------------------------------------------------------|--|
| EPI_ISL_1559823, EPI_ISL_1559929, EPI_ISL_1559969, EPI_ISL_1560017, EPI_ISL_1560024, EPI_ISL_1560028, EPI_ISL_1560060, EPI_ISL_1560074, EPI_ISL_1560187, EPI_ISL_1560231, EPI_ISL_1560313, EPI_ISL_1560358, EPI_ISL_1560380, EPI_ISL_1560405, EPI_ISL_1560415, EPI_ISL_1560418, EPI_ISL_1560539, EPI_ISL_1560630, EPI_ISL_1560676, EPI_ISL_1560820, EPI_ISL_1560821, EPI_ISL_1560859, EPI_ISL_1560901, EPI_ISL_1560968, EPI_ISL_1561017, EPI_ISL_1561019, EPI_ISL_1561154, EPI_ISL_1561241, EPI_ISL_1561242, EPI_ISL_1561244, EPI_ISL_1561266, EPI_ISL_1561285, EPI_ISL_1561319, EPI_ISL_1561326, EPI_ISL_1561405, EPI_ISL_1561407, EPI_ISL_1561425, EPI_ISL_1561433, EPI_ISL_1561452, EPI_ISL_1561515, EPI_ISL_1561536, EPI_ISL_1561557, EPI_ISL_1561570, EPI_ISL_1561667, EPI_ISL_1561675, EPI_ISL_1561676, EPI_ISL_1561721, EPI_ISL_1561740, EPI_ISL_1561840, EPI_ISL_1561842, EPI_ISL_1561845, EPI_ISL_1561846, EPI_ISL_1561853, EPI_ISL_1561854, EPI_ISL_1561857, EPI_ISL_1561890, EPI_ISL_1561940, EPI_ISL_1561966, EPI_ISL_1561977, EPI_ISL_1562016, EPI_ISL_1562056, EPI_ISL_1562082, EPI_ISL_1562085, EPI_ISL_1562113, EPI_ISL_1562117, EPI_ISL_1562119, EPI_ISL_1562150, EPI_ISL_1562154, EPI_ISL_1562185, EPI_ISL_1562187, EPI_ISL_1562199, EPI_ISL_1562228, EPI_ISL_1562246, EPI_ISL_1562302, EPI_ISL_1562303, EPI_ISL_1562367, EPI_ISL_1562402, EPI_ISL_1562408, EPI_ISL_1562410, EPI_ISL_1562425, EPI_ISL_1562431, EPI_ISL_1562432, EPI_ISL_1562454, EPI_ISL_1562457, EPI_ISL_1562517, EPI_ISL_1562518, EPI_ISL_1562519, EPI_ISL_1562520, EPI_ISL_1562524, EPI_ISL_1562562, EPI_ISL_1562687, EPI_ISL_1562690, EPI_ISL_1562776, EPI_ISL_1562784, EPI_ISL_1562787, EPI_ISL_1562809, EPI_ISL_1562833, EPI_ISL_1562844, EPI_ISL_1562853, EPI_ISL_1562917, EPI_ISL_1562919, EPI_ISL_1562959, EPI_ISL_1562984, EPI_ISL_1563004, EPI_ISL_1563154, EPI_ISL_1563231, EPI_ISL_1563243, EPI_ISL_1563264, EPI_ISL_1563285, EPI_ISL_1563347, EPI_ISL_1563348, EPI_ISL_1563355, EPI_ISL_1563356, EPI_ISL_1563385, EPI_ISL_1563396, EPI_ISL_1563443, EPI_ISL_1563475, EPI_ISL_1563569, EPI_ISL_1563588 |                                                       |                                                                                           |                                                                                                                                                                                                                                                                                                                                                                                                                                                                                                                                                                                                                                                                                                                         |  |
| see above                                                                                                                                                                                                                                                                                                                                                                                                                                                                                                                                                                                                                                                                                                                                                                                                                                                                                                                                                                                                                                                                                                                                                                                                                                                                                                                                                                                                                                                                                                                                                                                                                                                                                                                                                                                                                                                                                                                                                                                                                                                                                             | Aegis Sciences Corporation                            | Centers for Disease Control and Prevention Division of Viral Diseases, Pathogen Discovery | Dakota Howard, Dhvani Batra, Peter W. Cook, Kara Moser, Adrian Paskey, Jason Caravas, Benjamin Rambo-Martin, Shatavia Morrison, Christopher Gulvick, Scott Sammons, Yvette Unoarumhi, Darlene Wagner, Matthew Schmeier, Cyndi Clark, Patrick Campbell, Rob Case, Vikramsinh Ghorpade, Holly Houdeshell, Ola Kvalvaag, Dillon Nall, Ethan Sanders, Alec Vest, Shaun Westlund, Matthew Hardison, Clinton R. Paden, Duncan MacCannell                                                                                                                                                                                                                                                                                      |  |
| EPI_ISL_1563646                                                                                                                                                                                                                                                                                                                                                                                                                                                                                                                                                                                                                                                                                                                                                                                                                                                                                                                                                                                                                                                                                                                                                                                                                                                                                                                                                                                                                                                                                                                                                                                                                                                                                                                                                                                                                                                                                                                                                                                                                                                                                       | IN State Department of Health Laboratory Services     | IN State Department of Health Laboratory Services                                         | Cassandra Campion, Jamie Yeadon, Brian Pope, Lixia Liu, Kyle Brownlee, Melissa Hindenlang, Ankita Kashikar, Mark Glazier                                                                                                                                                                                                                                                                                                                                                                                                                                                                                                                                                                                                |  |
| EPI_ISL_1574987                                                                                                                                                                                                                                                                                                                                                                                                                                                                                                                                                                                                                                                                                                                                                                                                                                                                                                                                                                                                                                                                                                                                                                                                                                                                                                                                                                                                                                                                                                                                                                                                                                                                                                                                                                                                                                                                                                                                                                                                                                                                                       | Edward Hines Jr VA Hospital                           | Illinois Department of Public Health - Chicago Lab                                        | Vineet K. Dhiman, Ira Heimler                                                                                                                                                                                                                                                                                                                                                                                                                                                                                                                                                                                                                                                                                           |  |
| EPI_ISL_1575445                                                                                                                                                                                                                                                                                                                                                                                                                                                                                                                                                                                                                                                                                                                                                                                                                                                                                                                                                                                                                                                                                                                                                                                                                                                                                                                                                                                                                                                                                                                                                                                                                                                                                                                                                                                                                                                                                                                                                                                                                                                                                       | SUNY UPSTATE MEDICAL UNIVERSITY                       | Wadsworth Center, New York State Department of Health                                     | Kirsten St. George, Daryl M. Lamson, Alexis Russell, Matthew Shudt, Melissa A Leisner, Jonathan Plitnick, Catharine Prussing, Navjot Singh, John Kelly, Erasmus Schneider, Erica Lasek-Nesselquist                                                                                                                                                                                                                                                                                                                                                                                                                                                                                                                      |  |
| EPI_ISL_1575470                                                                                                                                                                                                                                                                                                                                                                                                                                                                                                                                                                                                                                                                                                                                                                                                                                                                                                                                                                                                                                                                                                                                                                                                                                                                                                                                                                                                                                                                                                                                                                                                                                                                                                                                                                                                                                                                                                                                                                                                                                                                                       | MONTEFIORE MEDICAL CENTER LABORATORIES                | Wadsworth Center, New York State Department of Health                                     | Kirsten St. George, Daryl M. Lamson, Alexis Russell, Matthew Shudt, Melissa A Leisner, Jonathan Plitnick, Catharine Prussing, Navjot Singh, John Kelly, Erasmus Schneider, Erica Lasek-Nesselquist                                                                                                                                                                                                                                                                                                                                                                                                                                                                                                                      |  |
| EPI_ISL_1575501, EPI_ISL_1575538, EPI_ISL_1575573, EPI_ISL_1575742, EPI_ISL_1575818, EPI_ISL_1575826, EPI_ISL_1575998, EPI_ISL_15776164, EPI_ISL_1576277                                                                                                                                                                                                                                                                                                                                                                                                                                                                                                                                                                                                                                                                                                                                                                                                                                                                                                                                                                                                                                                                                                                                                                                                                                                                                                                                                                                                                                                                                                                                                                                                                                                                                                                                                                                                                                                                                                                                              | Helix/Illumina                                        | Centers for Disease Control and Prevention Division of Viral Diseases, Pathogen Discovery | Dakota Howard, Dhvani Batra, Peter W. Cook, Kara Moser, Adrian Paskey, Jason Caravas, Benjamin Rambo-Martin, Shatavia Morrison, Christopher Gulvick, Scott Sammons, Yvette Unoarumhi, Darlene Wagner, Matthew Schmeier, Eileen de Feo, Jan Antico, Christine Tran, Matthew Tolentino, Shannon Wickline, Kim Gietzen, Brad Sickler, Jingtao Liu, Eric Allen, Phil Febbo, Nicole L. Washington, Simon White, Geraint Levan, Kelly Schiabor Barrett, Elizabeth Cirulli, Alexandre Bolze, Ary Ascencio, Charlotte Rivera-Garcia, Ryan Cho, Jason Nguyen, Sherry Wang, Jimmy Ramirez, Tyler Cassens, Efrén Sandoval, Magnus Isaksson, William Lee, David Becker, Marc Laurent, James Lu, Clinton R. Paden, Duncan MacCannell |  |
| EPI_ISL_1576301                                                                                                                                                                                                                                                                                                                                                                                                                                                                                                                                                                                                                                                                                                                                                                                                                                                                                                                                                                                                                                                                                                                                                                                                                                                                                                                                                                                                                                                                                                                                                                                                                                                                                                                                                                                                                                                                                                                                                                                                                                                                                       | Montana Public Health Laboratory                      | Montana Public Health Laboratory                                                          | Joy Ritter, Michelle Mozer, Carrie Biskupiak, Deborah Gibson                                                                                                                                                                                                                                                                                                                                                                                                                                                                                                                                                                                                                                                            |  |
| EPI_ISL_1576347, EPI_ISL_1576348, EPI_ISL_1576456, EPI_ISL_1576519, EPI_ISL_1576680, EPI_ISL_1576726, EPI_ISL_1576736                                                                                                                                                                                                                                                                                                                                                                                                                                                                                                                                                                                                                                                                                                                                                                                                                                                                                                                                                                                                                                                                                                                                                                                                                                                                                                                                                                                                                                                                                                                                                                                                                                                                                                                                                                                                                                                                                                                                                                                 | Helix/Illumina                                        | Centers for Disease Control and Prevention Division of Viral Diseases, Pathogen Discovery | Dakota Howard, Dhvani Batra, Peter W. Cook, Kara Moser, Adrian Paskey, Jason Caravas, Benjamin Rambo-Martin, Shatavia Morrison, Christopher Gulvick, Scott Sammons, Yvette Unoarumhi, Darlene Wagner, Matthew Schmeier, Eileen de Feo, Jan Antico, Christine Tran, Matthew Tolentino, Shannon Wickline, Kim Gietzen, Brad Sickler, Jingtao Liu, Eric Allen, Phil Febbo, Nicole L. Washington, Simon White, Geraint Levan, Kelly Schiabor Barrett, Elizabeth Cirulli, Alexandre Bolze, Ary Ascencio, Charlotte Rivera-Garcia, Ryan Cho, Jason Nguyen, Sherry Wang, Jimmy Ramirez, Tyler Cassens, Efrén Sandoval, Magnus Isaksson, William Lee, David Becker, Marc Laurent, James Lu, Clinton R. Paden, Duncan MacCannell |  |
| EPI_ISL_1576824                                                                                                                                                                                                                                                                                                                                                                                                                                                                                                                                                                                                                                                                                                                                                                                                                                                                                                                                                                                                                                                                                                                                                                                                                                                                                                                                                                                                                                                                                                                                                                                                                                                                                                                                                                                                                                                                                                                                                                                                                                                                                       | ALBANY MEDICAL CENTER                                 | Wadsworth Center, New York State Department of Health                                     | Kirsten St. George, Daryl M. Lamson, Alexis Russell, Matthew Shudt, Melissa A Leisner, Jonathan Plitnick, Catharine Prussing, Navjot Singh, John Kelly, Erasmus Schneider, Erica Lasek-Nesselquist                                                                                                                                                                                                                                                                                                                                                                                                                                                                                                                      |  |
| EPI_ISL_1576863, EPI_ISL_1576894, EPI_ISL_1576899, EPI_ISL_1576900, EPI_ISL_1576903, EPI_ISL_1576906, EPI_ISL_1576908, EPI_ISL_1576911, EPI_ISL_1576919, EPI_ISL_1576921, EPI_ISL_1576922, EPI_ISL_1576931, EPI_ISL_1576939, EPI_ISL_1576941, EPI_ISL_1576942                                                                                                                                                                                                                                                                                                                                                                                                                                                                                                                                                                                                                                                                                                                                                                                                                                                                                                                                                                                                                                                                                                                                                                                                                                                                                                                                                                                                                                                                                                                                                                                                                                                                                                                                                                                                                                         |                                                       |                                                                                           |                                                                                                                                                                                                                                                                                                                                                                                                                                                                                                                                                                                                                                                                                                                         |  |
| see above                                                                                                                                                                                                                                                                                                                                                                                                                                                                                                                                                                                                                                                                                                                                                                                                                                                                                                                                                                                                                                                                                                                                                                                                                                                                                                                                                                                                                                                                                                                                                                                                                                                                                                                                                                                                                                                                                                                                                                                                                                                                                             | NYU Langone Health                                    | Departments of Pathology and Medicine, New York University School of Medicine             | Adriana Heguy, Dacia Dimartino, Emily Guzman, Christian Marier, Peter Meyn, Sitharam Ramaswami, Gael Westby, Paul Zappile, Yutong Zhang, Paolo Cotzia, Guiqing Wang                                                                                                                                                                                                                                                                                                                                                                                                                                                                                                                                                     |  |
| EPI_ISL_1578053, EPI_ISL_1578081                                                                                                                                                                                                                                                                                                                                                                                                                                                                                                                                                                                                                                                                                                                                                                                                                                                                                                                                                                                                                                                                                                                                                                                                                                                                                                                                                                                                                                                                                                                                                                                                                                                                                                                                                                                                                                                                                                                                                                                                                                                                      | South Dakota Public Health Laboratory                 | South Dakota Public Health Laboratory                                                     | Jacob Garfin and Chris Carlson                                                                                                                                                                                                                                                                                                                                                                                                                                                                                                                                                                                                                                                                                          |  |
| EPI_ISL_1578180                                                                                                                                                                                                                                                                                                                                                                                                                                                                                                                                                                                                                                                                                                                                                                                                                                                                                                                                                                                                                                                                                                                                                                                                                                                                                                                                                                                                                                                                                                                                                                                                                                                                                                                                                                                                                                                                                                                                                                                                                                                                                       | Flow Health                                           | Infectious Disease Program, Broad Institute of Harvard and MIT                            | Lemieux,J.E., Siddle,K.J., Adams,G., Gladden-Young,A., Lagerborg,K., Rudy,M., DeRuff,K., Carter,A., Normandin,E., Bauer,M., Reilly,S., Tomkins-Tinch,C., Loreth,C., Chaluvadi,S., Birren,B.W., Gallagher,G., Smole,S., Park,D.J., MacInnis,B.L., and Sabeti,P.C.                                                                                                                                                                                                                                                                                                                                                                                                                                                        |  |
| EPI_ISL_1578211, EPI_ISL_1578358, EPI_ISL_1578359, EPI_ISL_1578360, EPI_ISL_1578367, EPI_ISL_1578373, EPI_ISL_1578374, EPI_ISL_1578376, EPI_ISL_1578388, EPI_ISL_1578396, EPI_ISL_1578401, EPI_ISL_1578403, EPI_ISL_1578404, EPI_ISL_1578405, EPI_ISL_1578406                                                                                                                                                                                                                                                                                                                                                                                                                                                                                                                                                                                                                                                                                                                                                                                                                                                                                                                                                                                                                                                                                                                                                                                                                                                                                                                                                                                                                                                                                                                                                                                                                                                                                                                                                                                                                                         |                                                       |                                                                                           |                                                                                                                                                                                                                                                                                                                                                                                                                                                                                                                                                                                                                                                                                                                         |  |
| see above                                                                                                                                                                                                                                                                                                                                                                                                                                                                                                                                                                                                                                                                                                                                                                                                                                                                                                                                                                                                                                                                                                                                                                                                                                                                                                                                                                                                                                                                                                                                                                                                                                                                                                                                                                                                                                                                                                                                                                                                                                                                                             | Broad Institute Clinical Research Sequencing Platform | Infectious Disease Program, Broad Institute of Harvard and MIT                            | Siddle,K.J., Adams,G., Pearlman,L., Gladden-Young,A., Vicente,G., Blumenstiel,B., DeFelice,M., Lee,M., McGovern,S., Lagerborg,K., Rudy,M., DeRuff,K., Carter,A., Normandin,E., Bauer,M., Reilly,S., Tomkins-Tinch,C., Loreth,C., Chaluvadi,S., Meldrim,J., Granger,B., Lemieux,J.E., Birren,B.W., Sabeti,P.C., Larkin,K., Dodge,S., Lennon,N., Madoff,L., Brown,C., Gallagher,G., Smole,S., Park,D.J., Gabriel,S., and MacInnis,B.L.                                                                                                                                                                                                                                                                                    |  |
| EPI_ISL_1580670                                                                                                                                                                                                                                                                                                                                                                                                                                                                                                                                                                                                                                                                                                                                                                                                                                                                                                                                                                                                                                                                                                                                                                                                                                                                                                                                                                                                                                                                                                                                                                                                                                                                                                                                                                                                                                                                                                                                                                                                                                                                                       | BOSTON HEART DIAGNOSTICS CORP                         | Wadsworth Center, New York State Department of Health                                     | Kirsten St. George, Daryl M. Lamson, Alexis Russell, Matthew Shudt, Melissa A Leisner, Jonathan Plitnick, Catharine Prussing, Navjot Singh, John Kelly, Erasmus Schneider, Erica Lasek-Nesselquist                                                                                                                                                                                                                                                                                                                                                                                                                                                                                                                      |  |
| EPI_ISL_1580689, EPI_ISL_1580690, EPI_ISL_1580693, EPI_ISL_1580696                                                                                                                                                                                                                                                                                                                                                                                                                                                                                                                                                                                                                                                                                                                                                                                                                                                                                                                                                                                                                                                                                                                                                                                                                                                                                                                                                                                                                                                                                                                                                                                                                                                                                                                                                                                                                                                                                                                                                                                                                                    | Columbia University Irving Medical Center             | Wadsworth Center, New York State Department of Health                                     | Kirsten St. George, Daryl M. Lamson, Alexis Russell, Matthew Shudt, Melissa A Leisner, Jonathan Plitnick, Catharine Prussing, Navjot Singh, John Kelly, Erasmus Schneider, Erica Lasek-Nesselquist                                                                                                                                                                                                                                                                                                                                                                                                                                                                                                                      |  |
| EPI_ISL_1580717                                                                                                                                                                                                                                                                                                                                                                                                                                                                                                                                                                                                                                                                                                                                                                                                                                                                                                                                                                                                                                                                                                                                                                                                                                                                                                                                                                                                                                                                                                                                                                                                                                                                                                                                                                                                                                                                                                                                                                                                                                                                                       | URMC LABS                                             | Wadsworth Center, New York State Department of Health                                     | Kirsten St. George, Daryl M. Lamson, Alexis Russell, Matthew Shudt, Melissa A Leisner, Jonathan Plitnick, Catharine Prussing, Navjot Singh, John Kelly, Erasmus Schneider, Erica Lasek-Nesselquist                                                                                                                                                                                                                                                                                                                                                                                                                                                                                                                      |  |
| EPI_ISL_1580731, EPI_ISL_1580733, EPI_ISL_1580735                                                                                                                                                                                                                                                                                                                                                                                                                                                                                                                                                                                                                                                                                                                                                                                                                                                                                                                                                                                                                                                                                                                                                                                                                                                                                                                                                                                                                                                                                                                                                                                                                                                                                                                                                                                                                                                                                                                                                                                                                                                     | NORTHWELL HEALTH LABORATORIES                         | Wadsworth Center, New York State Department of Health                                     | Kirsten St. George, Daryl M. Lamson, Alexis Russell, Matthew Shudt, Melissa A Leisner, Jonathan Plitnick, Catharine Prussing, Navjot Singh, John Kelly, Erasmus Schneider, Erica Lasek-Nesselquist                                                                                                                                                                                                                                                                                                                                                                                                                                                                                                                      |  |
| EPI_ISL_1581078, EPI_ISL_1581086, EPI_ISL_1581107, EPI_ISL_1581143, EPI_ISL_1581711, EPI_ISL_1581775                                                                                                                                                                                                                                                                                                                                                                                                                                                                                                                                                                                                                                                                                                                                                                                                                                                                                                                                                                                                                                                                                                                                                                                                                                                                                                                                                                                                                                                                                                                                                                                                                                                                                                                                                                                                                                                                                                                                                                                                  | Helix/Illumina                                        | Centers for Disease Control and Prevention Division of Viral Diseases, Pathogen Discovery | Dakota Howard, Dhvani Batra, Peter W. Cook, Kara Moser, Adrian Paskey, Jason Caravas, Benjamin Rambo-Martin, Shatavia Morrison, Christopher Gulvick, Scott Sammons, Yvette Unoarumhi, Darlene Wagner, Matthew Schmeier, Eileen de Feo, Jan Antico, Christine Tran, Matthew Tolentino, Shannon Wickline, Kim Gietzen, Brad Sickler, Jingtao Liu, Eric Allen, Phil Febbo, Nicole L. Washington, Simon White, Geraint Levan, Kelly Schiabor Barrett, Elizabeth Cirulli, Alexandre Bolze, Ary Ascencio, Charlotte Rivera-Garcia, Ryan Cho, Jason Nguyen, Sherry Wang, Jimmy Ramirez, Tyler Cassens, Efrén Sandoval, Magnus Isaksson, William Lee, David Becker, Marc Laurent, James Lu, Clinton R. Paden, Duncan MacCannell |  |
| EPI_ISL_1581958, EPI_ISL_1582049, EPI_ISL_1582072, EPI_ISL_1582074, EPI_ISL_1582085, EPI_ISL_1582099, EPI_ISL_1582103, EPI_ISL_1582116, EPI_ISL_1582120, EPI_ISL_1582126                                                                                                                                                                                                                                                                                                                                                                                                                                                                                                                                                                                                                                                                                                                                                                                                                                                                                                                                                                                                                                                                                                                                                                                                                                                                                                                                                                                                                                                                                                                                                                                                                                                                                                                                                                                                                                                                                                                              | Quest Diagnostics Incorporated                        | Centers for Disease Control and Prevention Division of Viral Diseases, Pathogen Discovery | Dakota Howard, Dhvani Batra, Peter W. Cook, Kara Moser, Adrian Paskey, Jason Caravas, Benjamin Rambo-Martin, Shatavia Morrison, Christopher Gulvick, Scott Sammons, Yvette Unoarumhi, Darlene Wagner, Matthew Schmeier, S. H. Rosenthal, A. Gerasimova, R. M. Kagan, B. Anderson, M. Hua, Y. Liu, L.E. Bernstein, K.E. Livingston, A. Perez, I. A. Shlyakhter, R. V. Rolando, R. Owen, P. Tanpaiboon, F. Lacbawan, Clinton R. Paden, Duncan MacCannell                                                                                                                                                                                                                                                                  |  |
| EPI_ISL_1582154                                                                                                                                                                                                                                                                                                                                                                                                                                                                                                                                                                                                                                                                                                                                                                                                                                                                                                                                                                                                                                                                                                                                                                                                                                                                                                                                                                                                                                                                                                                                                                                                                                                                                                                                                                                                                                                                                                                                                                                                                                                                                       | ALBANY MEDICAL CENTER                                 | Wadsworth Center, New York State Department of Health                                     | Kirsten St. George, Daryl M. Lamson, Alexis Russell, Matthew Shudt, Melissa A Leisner, Jonathan Plitnick, Catharine Prussing, Navjot Singh, John Kelly, Erasmus Schneider, Erica Lasek-Nesselquist                                                                                                                                                                                                                                                                                                                                                                                                                                                                                                                      |  |
| EPI_ISL_1582159                                                                                                                                                                                                                                                                                                                                                                                                                                                                                                                                                                                                                                                                                                                                                                                                                                                                                                                                                                                                                                                                                                                                                                                                                                                                                                                                                                                                                                                                                                                                                                                                                                                                                                                                                                                                                                                                                                                                                                                                                                                                                       | MONTEFIORE MEDICAL CENTER LABORATORIES                | Wadsworth Center, New York State Department of Health                                     | Kirsten St. George, Daryl M. Lamson, Alexis Russell, Matthew Shudt, Melissa A Leisner, Jonathan Plitnick, Catharine Prussing, Navjot Singh, John Kelly, Erasmus Schneider, Erica Lasek-Nesselquist                                                                                                                                                                                                                                                                                                                                                                                                                                                                                                                      |  |
| EPI_ISL_1582169                                                                                                                                                                                                                                                                                                                                                                                                                                                                                                                                                                                                                                                                                                                                                                                                                                                                                                                                                                                                                                                                                                                                                                                                                                                                                                                                                                                                                                                                                                                                                                                                                                                                                                                                                                                                                                                                                                                                                                                                                                                                                       | Quest Diagnostics Incorporated                        | Centers for Disease Control and Prevention Division of Viral Diseases, Pathogen Discovery | Dakota Howard, Dhvani Batra, Peter W. Cook, Kara Moser, Adrian Paskey, Jason Caravas, Benjamin Rambo-Martin, Shatavia Morrison, Christopher Gulvick, Scott Sammons, Yvette Unoarumhi, Darlene Wagner, Matthew Schmeier, S. H. Rosenthal, A. Gerasimova, R. M. Kagan, B. Anderson, M. Hua, Y. Liu, L.E. Bernstein, K.E. Livingston, A. Perez, I. A. Shlyakhter, R. V. Rolando, R. Owen, P. Tanpaiboon, F. Lacbawan, Clinton R. Paden, Duncan MacCannell                                                                                                                                                                                                                                                                  |  |
| EPI_ISL_1582174, EPI_ISL_1582175, EPI_ISL_1582176                                                                                                                                                                                                                                                                                                                                                                                                                                                                                                                                                                                                                                                                                                                                                                                                                                                                                                                                                                                                                                                                                                                                                                                                                                                                                                                                                                                                                                                                                                                                                                                                                                                                                                                                                                                                                                                                                                                                                                                                                                                     | MONTEFIORE MEDICAL CENTER LABORATORIES                | Wadsworth Center, New York State Department of Health                                     | Kirsten St. George, Daryl M. Lamson, Alexis Russell, Matthew Shudt, Melissa A Leisner, Jonathan Plitnick, Catharine Prussing, Navjot Singh, John Kelly, Erasmus Schneider, Erica Lasek-Nesselquist                                                                                                                                                                                                                                                                                                                                                                                                                                                                                                                      |  |
| EPI_ISL_1582181, EPI_ISL_1582183, EPI_ISL_1582184, EPI_ISL_1582188, EPI_ISL_1582200, EPI_ISL_1582204, EPI_ISL_1582207, EPI_ISL_1582208, EPI_ISL_1582210, EPI_ISL_1582213                                                                                                                                                                                                                                                                                                                                                                                                                                                                                                                                                                                                                                                                                                                                                                                                                                                                                                                                                                                                                                                                                                                                                                                                                                                                                                                                                                                                                                                                                                                                                                                                                                                                                                                                                                                                                                                                                                                              | NYC Pandemic Response Lab                             | Wadsworth Center, New York State Department of Health                                     | Kirsten St. George, Daryl M. Lamson, Alexis Russell, Matthew Shudt, Melissa A Leisner, Jonathan Plitnick, Catharine Prussing, Navjot Singh, John Kelly, Erasmus Schneider, Erica Lasek-Nesselquist                                                                                                                                                                                                                                                                                                                                                                                                                                                                                                                      |  |
| EPI_ISL_1582215                                                                                                                                                                                                                                                                                                                                                                                                                                                                                                                                                                                                                                                                                                                                                                                                                                                                                                                                                                                                                                                                                                                                                                                                                                                                                                                                                                                                                                                                                                                                                                                                                                                                                                                                                                                                                                                                                                                                                                                                                                                                                       | Columbia University Irving Medical Center             | Wadsworth Center, New York State Department of Health                                     | Kirsten St. George, Daryl M. Lamson, Alexis Russell, Matthew Shudt, Melissa A Leisner, Jonathan Plitnick, Catharine Prussing, Navjot Singh, John Kelly,                                                                                                                                                                                                                                                                                                                                                                                                                                                                                                                                                                 |  |

|                                                                                                                                                                                                                                                                                                                                                                                                                                                                                                                                                                                                                                                                                                                                                                                                                                                                                                                                                                                                                                                            |                                                       |                                                                                                                         |                                                                                                                                                                                                                                                                                                                                                                                                                                                                                                                                                                                                                                                                                                                                                                                                                                                                                                                                                                                                                                                       |                                                                                                                                                                                                                                                                                                                                                        |
|------------------------------------------------------------------------------------------------------------------------------------------------------------------------------------------------------------------------------------------------------------------------------------------------------------------------------------------------------------------------------------------------------------------------------------------------------------------------------------------------------------------------------------------------------------------------------------------------------------------------------------------------------------------------------------------------------------------------------------------------------------------------------------------------------------------------------------------------------------------------------------------------------------------------------------------------------------------------------------------------------------------------------------------------------------|-------------------------------------------------------|-------------------------------------------------------------------------------------------------------------------------|-------------------------------------------------------------------------------------------------------------------------------------------------------------------------------------------------------------------------------------------------------------------------------------------------------------------------------------------------------------------------------------------------------------------------------------------------------------------------------------------------------------------------------------------------------------------------------------------------------------------------------------------------------------------------------------------------------------------------------------------------------------------------------------------------------------------------------------------------------------------------------------------------------------------------------------------------------------------------------------------------------------------------------------------------------|--------------------------------------------------------------------------------------------------------------------------------------------------------------------------------------------------------------------------------------------------------------------------------------------------------------------------------------------------------|
|                                                                                                                                                                                                                                                                                                                                                                                                                                                                                                                                                                                                                                                                                                                                                                                                                                                                                                                                                                                                                                                            |                                                       |                                                                                                                         | Erasmus Schneider, Erica Lasek-Nesselquist                                                                                                                                                                                                                                                                                                                                                                                                                                                                                                                                                                                                                                                                                                                                                                                                                                                                                                                                                                                                            |                                                                                                                                                                                                                                                                                                                                                        |
| EPI_ISL_1582229                                                                                                                                                                                                                                                                                                                                                                                                                                                                                                                                                                                                                                                                                                                                                                                                                                                                                                                                                                                                                                            | SARATOGA HOSPITAL LABORATORY                          | Wadsworth Center, New York State Department of Health                                                                   | Kirsten St. George, Daryl M. Lamson, Alexis Russell, Matthew Shudt, Melissa A Leisner, Jonathan Plitnick, Catharine Prussing, Navjot Singh, John Kelly, Erasmus Schneider, Erica Lasek-Nesselquist                                                                                                                                                                                                                                                                                                                                                                                                                                                                                                                                                                                                                                                                                                                                                                                                                                                    |                                                                                                                                                                                                                                                                                                                                                        |
| EPI_ISL_1582231                                                                                                                                                                                                                                                                                                                                                                                                                                                                                                                                                                                                                                                                                                                                                                                                                                                                                                                                                                                                                                            | WESTCHESTER MEDICAL CENTER                            | Wadsworth Center, New York State Department of Health                                                                   | Kirsten St. George, Daryl M. Lamson, Alexis Russell, Matthew Shudt, Melissa A Leisner, Jonathan Plitnick, Catharine Prussing, Navjot Singh, John Kelly, Erasmus Schneider, Erica Lasek-Nesselquist                                                                                                                                                                                                                                                                                                                                                                                                                                                                                                                                                                                                                                                                                                                                                                                                                                                    |                                                                                                                                                                                                                                                                                                                                                        |
| EPI_ISL_1582233, EPI_ISL_1582239, EPI_ISL_1582242, EPI_ISL_1582244                                                                                                                                                                                                                                                                                                                                                                                                                                                                                                                                                                                                                                                                                                                                                                                                                                                                                                                                                                                         | TEMPUS LABS INC                                       | Wadsworth Center, New York State Department of Health                                                                   | Kirsten St. George, Daryl M. Lamson, Alexis Russell, Matthew Shudt, Melissa A Leisner, Jonathan Plitnick, Catharine Prussing, Navjot Singh, John Kelly, Erasmus Schneider, Erica Lasek-Nesselquist                                                                                                                                                                                                                                                                                                                                                                                                                                                                                                                                                                                                                                                                                                                                                                                                                                                    |                                                                                                                                                                                                                                                                                                                                                        |
| EPI_ISL_1582248                                                                                                                                                                                                                                                                                                                                                                                                                                                                                                                                                                                                                                                                                                                                                                                                                                                                                                                                                                                                                                            | STONY BROOK UNIVERSITY HOSPITAL                       | Wadsworth Center, New York State Department of Health                                                                   | Kirsten St. George, Daryl M. Lamson, Alexis Russell, Matthew Shudt, Melissa A Leisner, Jonathan Plitnick, Catharine Prussing, Navjot Singh, John Kelly, Erasmus Schneider, Erica Lasek-Nesselquist                                                                                                                                                                                                                                                                                                                                                                                                                                                                                                                                                                                                                                                                                                                                                                                                                                                    |                                                                                                                                                                                                                                                                                                                                                        |
| EPI_ISL_1582255                                                                                                                                                                                                                                                                                                                                                                                                                                                                                                                                                                                                                                                                                                                                                                                                                                                                                                                                                                                                                                            | GOOD SAMARITAN HOSPITAL LABORATORY                    | Wadsworth Center, New York State Department of Health                                                                   | Kirsten St. George, Daryl M. Lamson, Alexis Russell, Matthew Shudt, Melissa A Leisner, Jonathan Plitnick, Catharine Prussing, Navjot Singh, John Kelly, Erasmus Schneider, Erica Lasek-Nesselquist                                                                                                                                                                                                                                                                                                                                                                                                                                                                                                                                                                                                                                                                                                                                                                                                                                                    |                                                                                                                                                                                                                                                                                                                                                        |
| EPI_ISL_1582257                                                                                                                                                                                                                                                                                                                                                                                                                                                                                                                                                                                                                                                                                                                                                                                                                                                                                                                                                                                                                                            | NORTH SHORE UNIVERSITY HOSPITAL                       | Wadsworth Center, New York State Department of Health                                                                   | Kirsten St. George, Daryl M. Lamson, Alexis Russell, Matthew Shudt, Melissa A Leisner, Jonathan Plitnick, Catharine Prussing, Navjot Singh, John Kelly, Erasmus Schneider, Erica Lasek-Nesselquist                                                                                                                                                                                                                                                                                                                                                                                                                                                                                                                                                                                                                                                                                                                                                                                                                                                    |                                                                                                                                                                                                                                                                                                                                                        |
| EPI_ISL_1582260                                                                                                                                                                                                                                                                                                                                                                                                                                                                                                                                                                                                                                                                                                                                                                                                                                                                                                                                                                                                                                            | ALBANY MEDICAL CENTER                                 | Wadsworth Center, New York State Department of Health                                                                   | Kirsten St. George, Daryl M. Lamson, Alexis Russell, Matthew Shudt, Melissa A Leisner, Jonathan Plitnick, Catharine Prussing, Navjot Singh, John Kelly, Erasmus Schneider, Erica Lasek-Nesselquist                                                                                                                                                                                                                                                                                                                                                                                                                                                                                                                                                                                                                                                                                                                                                                                                                                                    |                                                                                                                                                                                                                                                                                                                                                        |
| EPI_ISL_1582263, EPI_ISL_1582268                                                                                                                                                                                                                                                                                                                                                                                                                                                                                                                                                                                                                                                                                                                                                                                                                                                                                                                                                                                                                           | Columbia University Irving Medical Center             | Wadsworth Center, New York State Department of Health                                                                   | Kirsten St. George, Daryl M. Lamson, Alexis Russell, Matthew Shudt, Melissa A Leisner, Jonathan Plitnick, Catharine Prussing, Navjot Singh, John Kelly, Erasmus Schneider, Erica Lasek-Nesselquist                                                                                                                                                                                                                                                                                                                                                                                                                                                                                                                                                                                                                                                                                                                                                                                                                                                    |                                                                                                                                                                                                                                                                                                                                                        |
| EPI_ISL_1582278, EPI_ISL_1582280                                                                                                                                                                                                                                                                                                                                                                                                                                                                                                                                                                                                                                                                                                                                                                                                                                                                                                                                                                                                                           | WHITE PLAINS HOSPITAL CENTER LABORATORY               | Wadsworth Center, New York State Department of Health                                                                   | Kirsten St. George, Daryl M. Lamson, Alexis Russell, Matthew Shudt, Melissa A Leisner, Jonathan Plitnick, Catharine Prussing, Navjot Singh, John Kelly, Erasmus Schneider, Erica Lasek-Nesselquist                                                                                                                                                                                                                                                                                                                                                                                                                                                                                                                                                                                                                                                                                                                                                                                                                                                    |                                                                                                                                                                                                                                                                                                                                                        |
| EPI_ISL_1582288                                                                                                                                                                                                                                                                                                                                                                                                                                                                                                                                                                                                                                                                                                                                                                                                                                                                                                                                                                                                                                            | NORTHWELL HEALTH LABORATORIES                         | Wadsworth Center, New York State Department of Health                                                                   | Kirsten St. George, Daryl M. Lamson, Alexis Russell, Matthew Shudt, Melissa A Leisner, Jonathan Plitnick, Catharine Prussing, Navjot Singh, John Kelly, Erasmus Schneider, Erica Lasek-Nesselquist                                                                                                                                                                                                                                                                                                                                                                                                                                                                                                                                                                                                                                                                                                                                                                                                                                                    |                                                                                                                                                                                                                                                                                                                                                        |
| EPI_ISL_1582309, EPI_ISL_1582310, EPI_ISL_1582313, EPI_ISL_1582315                                                                                                                                                                                                                                                                                                                                                                                                                                                                                                                                                                                                                                                                                                                                                                                                                                                                                                                                                                                         | WESTCHESTER MEDICAL CENTER                            | Wadsworth Center, New York State Department of Health                                                                   | Kirsten St. George, Daryl M. Lamson, Alexis Russell, Matthew Shudt, Melissa A Leisner, Jonathan Plitnick, Catharine Prussing, Navjot Singh, John Kelly, Erasmus Schneider, Erica Lasek-Nesselquist                                                                                                                                                                                                                                                                                                                                                                                                                                                                                                                                                                                                                                                                                                                                                                                                                                                    |                                                                                                                                                                                                                                                                                                                                                        |
| EPI_ISL_1582319, EPI_ISL_1582320                                                                                                                                                                                                                                                                                                                                                                                                                                                                                                                                                                                                                                                                                                                                                                                                                                                                                                                                                                                                                           | MONTEFIORE MEDICAL CENTER LABORATORIES                | Wadsworth Center, New York State Department of Health                                                                   | Kirsten St. George, Daryl M. Lamson, Alexis Russell, Matthew Shudt, Melissa A Leisner, Jonathan Plitnick, Catharine Prussing, Navjot Singh, John Kelly, Erasmus Schneider, Erica Lasek-Nesselquist                                                                                                                                                                                                                                                                                                                                                                                                                                                                                                                                                                                                                                                                                                                                                                                                                                                    |                                                                                                                                                                                                                                                                                                                                                        |
| EPI_ISL_1582328, EPI_ISL_1582329, EPI_ISL_1582335, EPI_ISL_1582336                                                                                                                                                                                                                                                                                                                                                                                                                                                                                                                                                                                                                                                                                                                                                                                                                                                                                                                                                                                         | NYC Pandemic Response Lab                             | Wadsworth Center, New York State Department of Health                                                                   | Kirsten St. George, Daryl M. Lamson, Alexis Russell, Matthew Shudt, Melissa A Leisner, Jonathan Plitnick, Catharine Prussing, Navjot Singh, John Kelly, Erasmus Schneider, Erica Lasek-Nesselquist                                                                                                                                                                                                                                                                                                                                                                                                                                                                                                                                                                                                                                                                                                                                                                                                                                                    |                                                                                                                                                                                                                                                                                                                                                        |
| EPI_ISL_1582362                                                                                                                                                                                                                                                                                                                                                                                                                                                                                                                                                                                                                                                                                                                                                                                                                                                                                                                                                                                                                                            | SUNY UPSTATE MEDICAL UNIVERSITY                       | Wadsworth Center, New York State Department of Health                                                                   | Kirsten St. George, Daryl M. Lamson, Alexis Russell, Matthew Shudt, Melissa A Leisner, Jonathan Plitnick, Catharine Prussing, Navjot Singh, John Kelly, Erasmus Schneider, Erica Lasek-Nesselquist                                                                                                                                                                                                                                                                                                                                                                                                                                                                                                                                                                                                                                                                                                                                                                                                                                                    |                                                                                                                                                                                                                                                                                                                                                        |
| EPI_ISL_1582369, EPI_ISL_1582370, EPI_ISL_1582374, EPI_ISL_1582376, EPI_ISL_1582385                                                                                                                                                                                                                                                                                                                                                                                                                                                                                                                                                                                                                                                                                                                                                                                                                                                                                                                                                                        | NORTHWELL HEALTH LABORATORIES                         | Wadsworth Center, New York State Department of Health                                                                   | Kirsten St. George, Daryl M. Lamson, Alexis Russell, Matthew Shudt, Melissa A Leisner, Jonathan Plitnick, Catharine Prussing, Navjot Singh, John Kelly, Erasmus Schneider, Erica Lasek-Nesselquist                                                                                                                                                                                                                                                                                                                                                                                                                                                                                                                                                                                                                                                                                                                                                                                                                                                    |                                                                                                                                                                                                                                                                                                                                                        |
| EPI_ISL_1582403                                                                                                                                                                                                                                                                                                                                                                                                                                                                                                                                                                                                                                                                                                                                                                                                                                                                                                                                                                                                                                            | TEMPUS LABS INC                                       | Wadsworth Center, New York State Department of Health                                                                   | Kirsten St. George, Daryl M. Lamson, Alexis Russell, Matthew Shudt, Melissa A Leisner, Jonathan Plitnick, Catharine Prussing, Navjot Singh, John Kelly, Erasmus Schneider, Erica Lasek-Nesselquist                                                                                                                                                                                                                                                                                                                                                                                                                                                                                                                                                                                                                                                                                                                                                                                                                                                    |                                                                                                                                                                                                                                                                                                                                                        |
| EPI_ISL_1585481, EPI_ISL_1585563                                                                                                                                                                                                                                                                                                                                                                                                                                                                                                                                                                                                                                                                                                                                                                                                                                                                                                                                                                                                                           | Centro de Investigación Biomédica de Occidente (CIBO) | Instituto Nacional de Enfermedades Respiratorias (INER):<br>Centro de Investigación en Enfermedades Infecciosas (CIENI) | Consortio Mexicano de Vigilancia Genómica (CoViGen-Mex). Authors (in alphabetical order): Julio Elias Alvarado-Yaah, Carlos F. Arias, Santiago Ávila-Ríos, Víctor Hugo Borja-Aburto, Celia Boukadida, Juan Bautista Chale-Dzul, Célida Duque Molina, José Antonio Enciso-Moreno, Gloria Elena Espinosa-Ayala, Fernando Fontove-Herrera, Víctor Eduardo García-Arias, Concepción Grajales-Muñiz, Ricardo Grande, Alfredo Herrera-Estrella, Carla Ivón Herrera-Najera, Pavel Isa, Brenda Irasema Maldonado-Meza, Bernardo Martínez-Miguel, Margarita Matías-Florentino, María Guadalupe de Jesús Miralles-Rivera, Gloria María Molina-Salinas, Hector Montoya-Fuentes, José Esteban Muñoz-Medina, José de Jesús Nuñez-Contreras, Alicia Ocaña-Mondragón, Luis Alberto Ochoa-Carrera, Hector Esteban Paz-Juárez, Francisco Pulido, Helen Haydee Fernanda Ramirez-Plascencia, Angel Gustavo Salas-Lais, Alejandro Sanchez-Flores, Clara Esperanza Santacruz-Tinoco, María Guadalupe Santiago-Mauricio, Nelly Sélem-Mojica, Blanca Taboada, Gloria Vazquez |                                                                                                                                                                                                                                                                                                                                                        |
| EPI_ISL_1587261, EPI_ISL_1587267, EPI_ISL_1587270, EPI_ISL_1587271, EPI_ISL_1587272, EPI_ISL_1587274, EPI_ISL_1587278, EPI_ISL_1587280, EPI_ISL_1587282, EPI_ISL_1587285, EPI_ISL_1587291, EPI_ISL_1587292, EPI_ISL_1587297, EPI_ISL_1587298, EPI_ISL_1587309, EPI_ISL_1587311, EPI_ISL_1587312, EPI_ISL_1587317, EPI_ISL_1587320, EPI_ISL_1587321, EPI_ISL_1587328, EPI_ISL_1587329, EPI_ISL_1587330, EPI_ISL_1587334, EPI_ISL_1587339, EPI_ISL_1587341, EPI_ISL_1587342, EPI_ISL_1587343, EPI_ISL_1587344, EPI_ISL_1587347, EPI_ISL_1587348, EPI_ISL_1587350, EPI_ISL_1587354, EPI_ISL_1587357, EPI_ISL_1587358, EPI_ISL_1587361, EPI_ISL_1587371, EPI_ISL_1587375, EPI_ISL_1587377, EPI_ISL_1587378, EPI_ISL_1587381, EPI_ISL_1587382, EPI_ISL_1587383, EPI_ISL_1587384, EPI_ISL_1587385, EPI_ISL_1587386, EPI_ISL_1587390, EPI_ISL_1587395, EPI_ISL_1587398, EPI_ISL_1587403, EPI_ISL_1587404, EPI_ISL_1587409, EPI_ISL_1587410, EPI_ISL_1587411, EPI_ISL_1587418, EPI_ISL_1587421, EPI_ISL_1587423, EPI_ISL_1587424, EPI_ISL_1587426, EPI_ISL_1587427 | Yale Clinical Virology Lab                            | Grubaugh Lab - Yale School of Public Health                                                                             | Joseph Fauver, Mallery Breban, Isabel Ott, Tara Alpert, Mary Petrone, Anderson Brito, Chantal Vogels, Annie Watkins, Chaney Kalinich, Jessica Rothman, Marie L. Landry, Nathan Grubaugh                                                                                                                                                                                                                                                                                                                                                                                                                                                                                                                                                                                                                                                                                                                                                                                                                                                               |                                                                                                                                                                                                                                                                                                                                                        |
| EPI_ISL_1587589, EPI_ISL_1587593, EPI_ISL_1587594, EPI_ISL_1587601, EPI_ISL_1587619, EPI_ISL_1587660, EPI_ISL_1587715, EPI_ISL_1587716, EPI_ISL_1587744, EPI_ISL_1587750, EPI_ISL_1587898, EPI_ISL_1587917, EPI_ISL_1587919, EPI_ISL_1587952, EPI_ISL_1587956, EPI_ISL_1587976, EPI_ISL_1587987, EPI_ISL_1588003, EPI_ISL_1588019, EPI_ISL_1588020, EPI_ISL_1588023, EPI_ISL_1588211, EPI_ISL_1588288, EPI_ISL_1588298, EPI_ISL_1588301, EPI_ISL_1588363, EPI_ISL_1588371, EPI_ISL_1588405, EPI_ISL_1588412, EPI_ISL_1588415, EPI_ISL_1588418, EPI_ISL_1588435                                                                                                                                                                                                                                                                                                                                                                                                                                                                                             | see above                                             | Infinity Biologix                                                                                                       | Centers for Disease Control and Prevention Division of Viral Diseases, Pathogen Discovery                                                                                                                                                                                                                                                                                                                                                                                                                                                                                                                                                                                                                                                                                                                                                                                                                                                                                                                                                             | Dakota Howard, Dhvani Batra, Peter W. Cook, Kara Moser, Adrian Paskey, Jason Caravas, Benjamin Rambo-Martin, Shatavia Morrison, Christopher Gulvick, Scott Sammons, Yvette Unoarumhi, Darlene Wagner, Matthew Schmerer, Christian Bixby, Yihe Wang, Jonathan Schultz, Chirayu Goswami, Russ Hager, Robin Grimwood, Clinton R. Paden, Duncan MacCannell |
| EPI_ISL_1592148                                                                                                                                                                                                                                                                                                                                                                                                                                                                                                                                                                                                                                                                                                                                                                                                                                                                                                                                                                                                                                            | TGen North                                            | TGen North                                                                                                              | Jolene Bowers, Heather Centner, Chris French, Hayley Yaglom, Ashlyn Pfeiffer, Darrin Lemmer, Dave Engelthaler, The Arizona COVID Genomics Union (ACGU)                                                                                                                                                                                                                                                                                                                                                                                                                                                                                                                                                                                                                                                                                                                                                                                                                                                                                                |                                                                                                                                                                                                                                                                                                                                                        |
| EPI_ISL_1592597, EPI_ISL_1592661, EPI_ISL_1592963, EPI_ISL_1593139, EPI_ISL_1593182                                                                                                                                                                                                                                                                                                                                                                                                                                                                                                                                                                                                                                                                                                                                                                                                                                                                                                                                                                        | Helix/Illumina                                        | Centers for Disease Control and Prevention Division of Viral Diseases, Pathogen Discovery                               | Dakota Howard, Dhvani Batra, Peter W. Cook, Kara Moser, Adrian Paskey, Jason Caravas, Benjamin Rambo-Martin, Shatavia Morrison, Christopher Gulvick, Scott Sammons, Yvette Unoarumhi, Darlene Wagner, Matthew Schmerer, Eileen de Feo, Jan Antico, Christine Tran, Matthew Tolentino, Shannon Wickline, Kim Gietzen, Brad Sickler, Jingtao Liu, Eric Allen, Phil Febbo, Nicole L. Washington, Simon White, Geraint Levan, Kelly Schiabor Barrett, Elizabeth Cirulli, Alexandre Bolze, Ary Ascencio, Charlotte Rivera-García, Ryan Cho, Jason Nguyen, Sherry Wang, Jimmy Ramirez, Tyler Cassens, Eftren Sandoval, Magnus Isaksson, William Lee, David Becker, Marc Laurent, James Lu, Clinton R. Paden, Duncan MacCannell                                                                                                                                                                                                                                                                                                                              |                                                                                                                                                                                                                                                                                                                                                        |
| EPI_ISL_1593720                                                                                                                                                                                                                                                                                                                                                                                                                                                                                                                                                                                                                                                                                                                                                                                                                                                                                                                                                                                                                                            | DOHMH Central Harlem                                  | New York City Public Health Laboratory                                                                                  | Jade Wang, et al.                                                                                                                                                                                                                                                                                                                                                                                                                                                                                                                                                                                                                                                                                                                                                                                                                                                                                                                                                                                                                                     |                                                                                                                                                                                                                                                                                                                                                        |
| EPI_ISL_1593741                                                                                                                                                                                                                                                                                                                                                                                                                                                                                                                                                                                                                                                                                                                                                                                                                                                                                                                                                                                                                                            | DOHMH Crown Heights                                   | New York City Public Health Laboratory                                                                                  | Jade Wang, et al.                                                                                                                                                                                                                                                                                                                                                                                                                                                                                                                                                                                                                                                                                                                                                                                                                                                                                                                                                                                                                                     |                                                                                                                                                                                                                                                                                                                                                        |
| EPI_ISL_1593748                                                                                                                                                                                                                                                                                                                                                                                                                                                                                                                                                                                                                                                                                                                                                                                                                                                                                                                                                                                                                                            | DOHMH Jamaica                                         | New York City Public Health Laboratory                                                                                  | Jade Wang, et al.                                                                                                                                                                                                                                                                                                                                                                                                                                                                                                                                                                                                                                                                                                                                                                                                                                                                                                                                                                                                                                     |                                                                                                                                                                                                                                                                                                                                                        |
| EPI_ISL_1593750                                                                                                                                                                                                                                                                                                                                                                                                                                                                                                                                                                                                                                                                                                                                                                                                                                                                                                                                                                                                                                            | DOHMH Fort Greene                                     | New York City Public Health Laboratory                                                                                  | Jade Wang, et al.                                                                                                                                                                                                                                                                                                                                                                                                                                                                                                                                                                                                                                                                                                                                                                                                                                                                                                                                                                                                                                     |                                                                                                                                                                                                                                                                                                                                                        |
| EPI_ISL_1593757                                                                                                                                                                                                                                                                                                                                                                                                                                                                                                                                                                                                                                                                                                                                                                                                                                                                                                                                                                                                                                            | OCME Office Of Chief Medical Examiner                 | New York City Public Health Laboratory                                                                                  | Jade Wang, et al.                                                                                                                                                                                                                                                                                                                                                                                                                                                                                                                                                                                                                                                                                                                                                                                                                                                                                                                                                                                                                                     |                                                                                                                                                                                                                                                                                                                                                        |
| EPI_ISL_1593770                                                                                                                                                                                                                                                                                                                                                                                                                                                                                                                                                                                                                                                                                                                                                                                                                                                                                                                                                                                                                                            | DOHMH Fort Greene                                     | New York City Public Health Laboratory                                                                                  | Jade Wang, et al.                                                                                                                                                                                                                                                                                                                                                                                                                                                                                                                                                                                                                                                                                                                                                                                                                                                                                                                                                                                                                                     |                                                                                                                                                                                                                                                                                                                                                        |
| EPI_ISL_1593811                                                                                                                                                                                                                                                                                                                                                                                                                                                                                                                                                                                                                                                                                                                                                                                                                                                                                                                                                                                                                                            | Wyoming Public Health Laboratory                      | Wyoming Public Health Laboratory                                                                                        | Jim Mildenberger, Wanda Manley, Noah Hull, Taylor Fearing, Lynette Gumbleton, Channing Weber, Ashley Norberg, Chayse Rowley, Marley Goetz, Brian Dominguez, Elliot Thomasson, Sam Britz, Cari Sloma, and Rob Christensen                                                                                                                                                                                                                                                                                                                                                                                                                                                                                                                                                                                                                                                                                                                                                                                                                              |                                                                                                                                                                                                                                                                                                                                                        |
| EPI_ISL_1593865                                                                                                                                                                                                                                                                                                                                                                                                                                                                                                                                                                                                                                                                                                                                                                                                                                                                                                                                                                                                                                            | WESTCHESTER MEDICAL CENTER                            | Wadsworth Center, New York State Department of Health                                                                   | Kirsten St. George, Daryl M. Lamson, Alexis Russell, Matthew Shudt, Melissa A Leisner, Jonathan Plitnick, Catharine Prussing, Navjot Singh, John Kelly, Erasmus Schneider, Erica Lasek-Nesselquist                                                                                                                                                                                                                                                                                                                                                                                                                                                                                                                                                                                                                                                                                                                                                                                                                                                    |                                                                                                                                                                                                                                                                                                                                                        |
| EPI_ISL_1593868                                                                                                                                                                                                                                                                                                                                                                                                                                                                                                                                                                                                                                                                                                                                                                                                                                                                                                                                                                                                                                            | MONTEFIORE MEDICAL CENTER LABORATORIES                | Wadsworth Center, New York State Department of Health                                                                   | Kirsten St. George, Daryl M. Lamson, Alexis Russell, Matthew Shudt, Melissa A Leisner, Jonathan Plitnick, Catharine Prussing, Navjot Singh, John Kelly, Erasmus Schneider, Erica Lasek-Nesselquist                                                                                                                                                                                                                                                                                                                                                                                                                                                                                                                                                                                                                                                                                                                                                                                                                                                    |                                                                                                                                                                                                                                                                                                                                                        |



|                                                                                                                                                                                                                                                                                                                                                                                                                                                                                                                                                                                                                                                                                                                                                                                                                                                                                                                                                                                                                                                                                                                                                                                                                                                                                                                                                                                                                                                                                                                                                                                                                                                                                                                                                                                                                                                                                                                                                                                                                                                                                                                                                                                                                                                                                                                                                                                                                                                                                                                                                                                                                                                                                                                                                                                                                                                                                                                                                                                                                                                                                                                                                                                                                                                                                                                                                                                                                                                                                                                                                                          |                                                                    |                                                                                           |                                                                                                                                                                                                                                                                                                                                                                                                                                                                                                                                                                                                                                                                                                                        |                                                                                                                                                                                                                                                                                                                                                                                                                                                                                                                                                                                                                                                                                                                                                                                                                                                                                                                                                                                                                                                   |
|--------------------------------------------------------------------------------------------------------------------------------------------------------------------------------------------------------------------------------------------------------------------------------------------------------------------------------------------------------------------------------------------------------------------------------------------------------------------------------------------------------------------------------------------------------------------------------------------------------------------------------------------------------------------------------------------------------------------------------------------------------------------------------------------------------------------------------------------------------------------------------------------------------------------------------------------------------------------------------------------------------------------------------------------------------------------------------------------------------------------------------------------------------------------------------------------------------------------------------------------------------------------------------------------------------------------------------------------------------------------------------------------------------------------------------------------------------------------------------------------------------------------------------------------------------------------------------------------------------------------------------------------------------------------------------------------------------------------------------------------------------------------------------------------------------------------------------------------------------------------------------------------------------------------------------------------------------------------------------------------------------------------------------------------------------------------------------------------------------------------------------------------------------------------------------------------------------------------------------------------------------------------------------------------------------------------------------------------------------------------------------------------------------------------------------------------------------------------------------------------------------------------------------------------------------------------------------------------------------------------------------------------------------------------------------------------------------------------------------------------------------------------------------------------------------------------------------------------------------------------------------------------------------------------------------------------------------------------------------------------------------------------------------------------------------------------------------------------------------------------------------------------------------------------------------------------------------------------------------------------------------------------------------------------------------------------------------------------------------------------------------------------------------------------------------------------------------------------------------------------------------------------------------------------------------------------------|--------------------------------------------------------------------|-------------------------------------------------------------------------------------------|------------------------------------------------------------------------------------------------------------------------------------------------------------------------------------------------------------------------------------------------------------------------------------------------------------------------------------------------------------------------------------------------------------------------------------------------------------------------------------------------------------------------------------------------------------------------------------------------------------------------------------------------------------------------------------------------------------------------|---------------------------------------------------------------------------------------------------------------------------------------------------------------------------------------------------------------------------------------------------------------------------------------------------------------------------------------------------------------------------------------------------------------------------------------------------------------------------------------------------------------------------------------------------------------------------------------------------------------------------------------------------------------------------------------------------------------------------------------------------------------------------------------------------------------------------------------------------------------------------------------------------------------------------------------------------------------------------------------------------------------------------------------------------|
| EPI_ISL_1593883                                                                                                                                                                                                                                                                                                                                                                                                                                                                                                                                                                                                                                                                                                                                                                                                                                                                                                                                                                                                                                                                                                                                                                                                                                                                                                                                                                                                                                                                                                                                                                                                                                                                                                                                                                                                                                                                                                                                                                                                                                                                                                                                                                                                                                                                                                                                                                                                                                                                                                                                                                                                                                                                                                                                                                                                                                                                                                                                                                                                                                                                                                                                                                                                                                                                                                                                                                                                                                                                                                                                                          | NYC Pandemic Response Lab                                          | Wadsworth Center, New York State Department of Health                                     | Kirsten St. George, Daryl M. Lamson, Alexis Russell, Matthew Shudt, Melissa A Leisner, Jonathan Plitnick, Catharine Prussing, Navjot Singh, John Kelly, Erasmus Schneider, Erica Lasek-Nesselquist                                                                                                                                                                                                                                                                                                                                                                                                                                                                                                                     |                                                                                                                                                                                                                                                                                                                                                                                                                                                                                                                                                                                                                                                                                                                                                                                                                                                                                                                                                                                                                                                   |
| EPI_ISL_1593887                                                                                                                                                                                                                                                                                                                                                                                                                                                                                                                                                                                                                                                                                                                                                                                                                                                                                                                                                                                                                                                                                                                                                                                                                                                                                                                                                                                                                                                                                                                                                                                                                                                                                                                                                                                                                                                                                                                                                                                                                                                                                                                                                                                                                                                                                                                                                                                                                                                                                                                                                                                                                                                                                                                                                                                                                                                                                                                                                                                                                                                                                                                                                                                                                                                                                                                                                                                                                                                                                                                                                          | NORTHWELL HEALTH LABORATORIES                                      | Wadsworth Center, New York State Department of Health                                     | Kirsten St. George, Daryl M. Lamson, Alexis Russell, Matthew Shudt, Melissa A Leisner, Jonathan Plitnick, Catharine Prussing, Navjot Singh, John Kelly, Erasmus Schneider, Erica Lasek-Nesselquist                                                                                                                                                                                                                                                                                                                                                                                                                                                                                                                     |                                                                                                                                                                                                                                                                                                                                                                                                                                                                                                                                                                                                                                                                                                                                                                                                                                                                                                                                                                                                                                                   |
| EPI_ISL_1594026                                                                                                                                                                                                                                                                                                                                                                                                                                                                                                                                                                                                                                                                                                                                                                                                                                                                                                                                                                                                                                                                                                                                                                                                                                                                                                                                                                                                                                                                                                                                                                                                                                                                                                                                                                                                                                                                                                                                                                                                                                                                                                                                                                                                                                                                                                                                                                                                                                                                                                                                                                                                                                                                                                                                                                                                                                                                                                                                                                                                                                                                                                                                                                                                                                                                                                                                                                                                                                                                                                                                                          | University of Wisconsin-Madison AIDS Vaccine Research Laboratories | University of Wisconsin-Madison AIDS Vaccine Research Laboratories                        | Gage Moreno, Katarina Braun, et al. AIDS Vaccine Research Laboratories                                                                                                                                                                                                                                                                                                                                                                                                                                                                                                                                                                                                                                                 |                                                                                                                                                                                                                                                                                                                                                                                                                                                                                                                                                                                                                                                                                                                                                                                                                                                                                                                                                                                                                                                   |
| EPI_ISL_1597697, EPI_ISL_1597705, EPI_ISL_1597708, EPI_ISL_1597710, EPI_ISL_1597715, EPI_ISL_1597717, EPI_ISL_1597727, EPI_ISL_1597729, EPI_ISL_1597731, EPI_ISL_1597746, EPI_ISL_1597748, EPI_ISL_1597749, EPI_ISL_1597751, EPI_ISL_1597755, EPI_ISL_1597757, EPI_ISL_1597758, EPI_ISL_1597760, EPI_ISL_1597765, EPI_ISL_1597770, EPI_ISL_1597771, EPI_ISL_1597773                                                                                                                                                                                                                                                                                                                                                                                                                                                                                                                                                                                                                                                                                                                                                                                                                                                                                                                                                                                                                                                                                                                                                                                                                                                                                                                                                                                                                                                                                                                                                                                                                                                                                                                                                                                                                                                                                                                                                                                                                                                                                                                                                                                                                                                                                                                                                                                                                                                                                                                                                                                                                                                                                                                                                                                                                                                                                                                                                                                                                                                                                                                                                                                                      | see above                                                          | Montefiore Medical Center<br>Abbott                                                       | Yitz Goldstein, Amy Fox, Ana Olivo, Ana Vallari, Barbara Harris, Mary Rodgers, Todd Meyer, Gavin Cloherty                                                                                                                                                                                                                                                                                                                                                                                                                                                                                                                                                                                                              |                                                                                                                                                                                                                                                                                                                                                                                                                                                                                                                                                                                                                                                                                                                                                                                                                                                                                                                                                                                                                                                   |
| EPI_ISL_1608212                                                                                                                                                                                                                                                                                                                                                                                                                                                                                                                                                                                                                                                                                                                                                                                                                                                                                                                                                                                                                                                                                                                                                                                                                                                                                                                                                                                                                                                                                                                                                                                                                                                                                                                                                                                                                                                                                                                                                                                                                                                                                                                                                                                                                                                                                                                                                                                                                                                                                                                                                                                                                                                                                                                                                                                                                                                                                                                                                                                                                                                                                                                                                                                                                                                                                                                                                                                                                                                                                                                                                          | North Dakota Department of Health, Public Health Laboratory        | North Dakota Department of Health, Public Health Laboratory                               | Lisa Wingerter                                                                                                                                                                                                                                                                                                                                                                                                                                                                                                                                                                                                                                                                                                         |                                                                                                                                                                                                                                                                                                                                                                                                                                                                                                                                                                                                                                                                                                                                                                                                                                                                                                                                                                                                                                                   |
| EPI_ISL_1608805, EPI_ISL_1608880, EPI_ISL_1609009, EPI_ISL_1609049, EPI_ISL_1609071, EPI_ISL_1609076, EPI_ISL_1609077, EPI_ISL_1609110, EPI_ISL_1609150, EPI_ISL_1609168, EPI_ISL_1609170, EPI_ISL_1609177, EPI_ISL_1609204, EPI_ISL_1609238, EPI_ISL_1609240, EPI_ISL_1609241, EPI_ISL_1609244, EPI_ISL_1609249, EPI_ISL_1609253, EPI_ISL_1609255, EPI_ISL_1609259, EPI_ISL_1609265, EPI_ISL_1609276, EPI_ISL_1609291, EPI_ISL_1609306, EPI_ISL_1609307, EPI_ISL_1609309, EPI_ISL_1609315, EPI_ISL_1609316, EPI_ISL_1609319, EPI_ISL_1609325, EPI_ISL_1609329, EPI_ISL_1609331, EPI_ISL_1609332, EPI_ISL_1609337, EPI_ISL_1609341, EPI_ISL_1609341, EPI_ISL_1609354, EPI_ISL_1609367, EPI_ISL_1609385, EPI_ISL_1609402, EPI_ISL_1609412, EPI_ISL_1609417, EPI_ISL_1609419, EPI_ISL_1609424, EPI_ISL_1609435, EPI_ISL_1609450, EPI_ISL_1609451, EPI_ISL_1609457, EPI_ISL_1609465, EPI_ISL_1609472, EPI_ISL_1609495, EPI_ISL_1609497, EPI_ISL_1609498, EPI_ISL_1609499, EPI_ISL_1609501, EPI_ISL_1609501, EPI_ISL_1609504, EPI_ISL_1609511, EPI_ISL_1609513, EPI_ISL_1609521, EPI_ISL_1609527, EPI_ISL_1609533, EPI_ISL_1609537, EPI_ISL_1609600, EPI_ISL_1609606, EPI_ISL_1609603, EPI_ISL_1609612, EPI_ISL_1609622, EPI_ISL_1609626, EPI_ISL_1609656, EPI_ISL_1609668, EPI_ISL_1609680, EPI_ISL_1609693, EPI_ISL_1609703, EPI_ISL_1609779, EPI_ISL_1609796, EPI_ISL_1609797, EPI_ISL_1609800, EPI_ISL_1609808, EPI_ISL_1609812, EPI_ISL_1609824, EPI_ISL_1609876, EPI_ISL_1609877, EPI_ISL_1609880, EPI_ISL_1609890, EPI_ISL_1609903, EPI_ISL_1609914, EPI_ISL_1609922, EPI_ISL_1609928, EPI_ISL_1609931, EPI_ISL_1609943, EPI_ISL_1609952, EPI_ISL_1609956, EPI_ISL_1609962, EPI_ISL_1610003, EPI_ISL_1610034, EPI_ISL_1610036, EPI_ISL_1610115, EPI_ISL_1610156, EPI_ISL_1610206, EPI_ISL_1610218, EPI_ISL_1610238, EPI_ISL_1610249, EPI_ISL_1610320, EPI_ISL_1610367, EPI_ISL_1610441, EPI_ISL_1610521, EPI_ISL_1610602, EPI_ISL_1610675, EPI_ISL_1610721, EPI_ISL_1610741, EPI_ISL_1610866, EPI_ISL_1610951, EPI_ISL_1610953, EPI_ISL_1611115, EPI_ISL_1611219, EPI_ISL_1611221, EPI_ISL_1611244, EPI_ISL_1611250, EPI_ISL_1611252, EPI_ISL_1611269, EPI_ISL_1611296, EPI_ISL_1611314, EPI_ISL_1611327, EPI_ISL_1611332, EPI_ISL_1611353, EPI_ISL_1611365, EPI_ISL_1611366, EPI_ISL_1611368, EPI_ISL_1611376, EPI_ISL_1611378, EPI_ISL_1611381, EPI_ISL_1611399, EPI_ISL_1611428, EPI_ISL_1611433, EPI_ISL_1611433, EPI_ISL_1611437, EPI_ISL_1611438, EPI_ISL_1611442, EPI_ISL_1611464, EPI_ISL_1611467, EPI_ISL_1611528, EPI_ISL_1611530, EPI_ISL_1611538, EPI_ISL_1611539, EPI_ISL_1611543, EPI_ISL_1611547, EPI_ISL_1611549, EPI_ISL_1611552, EPI_ISL_1611564, EPI_ISL_1611569, EPI_ISL_1611570, EPI_ISL_1611571, EPI_ISL_1611611, EPI_ISL_1611626, EPI_ISL_1611631, EPI_ISL_1611632, EPI_ISL_1611664, EPI_ISL_1611689, EPI_ISL_1611691, EPI_ISL_1611693, EPI_ISL_1611711, EPI_ISL_1611726, EPI_ISL_1611744, EPI_ISL_1611760, EPI_ISL_1611788, EPI_ISL_1611795, EPI_ISL_1611814, EPI_ISL_1611820, EPI_ISL_1611823, EPI_ISL_1611844, EPI_ISL_1611848, EPI_ISL_1611851, EPI_ISL_1611865, EPI_ISL_1611897, EPI_ISL_1611898, EPI_ISL_1611908, EPI_ISL_1611916, EPI_ISL_1611917, EPI_ISL_1611922, EPI_ISL_1611923, EPI_ISL_1611926, EPI_ISL_1611928, EPI_ISL_1611931, EPI_ISL_1611932, EPI_ISL_1611940, EPI_ISL_1611957, EPI_ISL_1611961, EPI_ISL_1612038, EPI_ISL_1612111, EPI_ISL_1612119, EPI_ISL_1612170, EPI_ISL_1612212, EPI_ISL_1612254, EPI_ISL_1612329, EPI_ISL_1612453, EPI_ISL_1612471, EPI_ISL_1612677, EPI_ISL_1612747, EPI_ISL_1612750, EPI_ISL_1612806 | see above                                                          | Laboratory Corporation of America                                                         | Centers for Disease Control and Prevention Division of Viral Diseases, Pathogen Discovery                                                                                                                                                                                                                                                                                                                                                                                                                                                                                                                                                                                                                              | Dakota Howard, Dhvani Batra, Peter W. Cook, Kara Moser, Adrian Paskey, Jason Caravas, Benjamin Rambo-Martin, Shatavia Morrison, Christopher Gulvick, Scott Sammons, Yvette Unoarumhi, Darlene Wagner, Matthew Schmeier, Minoo Agarwal, Eyad Almasri, Debbie Boles, Ayla Burns, Nuthawin Charoensri, Oren Cohen, Susan Countryman, Mary Ann Cristobal, Bobbi Croy, Suzanne Dale, Hrushikesh Deshmukh, Amanda Douglas, Vincent Drouillon, Marcia Eisenberg, Howard Engler, Rama Ghatti, Prashant Gupta, Susan Hicks, Jake Humphrey, Lax Iyer, Manoj Jain, Mohan Kolli, Brian Krueger, Tim Kuphal, Stanley Letovsky, Michael Levandoski, Craig Lukasik, Jonathan Meltzer, Brian Norvell, Mindy Nye, Scott Parker, Cristian Petropoulos, John Pruitt, Steven Ragan, Scott Ryan, Mike Sapeta, Jana Schroth, Suresh Babu Selvaraju, Goran Stencovic, Amanda Suchanek, Andrea Throop, Lyndon Tilson, Thomas Urban, Joe Voshell, Kimberly Wagner, Jonathan Williams, Mary Williamson, Qian Zeng, Tricia Zwiefelhofer, Clinton R. Paden, Duncan MacCannell |
| EPI_ISL_1612978, EPI_ISL_1613224, EPI_ISL_1613304, EPI_ISL_1613363, EPI_ISL_1613369, EPI_ISL_1613384, EPI_ISL_1613395, EPI_ISL_1613493, EPI_ISL_1613502, EPI_ISL_1613514, EPI_ISL_1613517, EPI_ISL_1613952, EPI_ISL_1614014, EPI_ISL_1614015, EPI_ISL_1614051, EPI_ISL_1614093, EPI_ISL_1614099, EPI_ISL_1614133, EPI_ISL_1614147, EPI_ISL_1614162, EPI_ISL_1614524, EPI_ISL_1614533, EPI_ISL_1614602, EPI_ISL_1614620, EPI_ISL_1614669, EPI_ISL_1614674, EPI_ISL_1614686, EPI_ISL_1614796, EPI_ISL_1614840, EPI_ISL_1614850, EPI_ISL_1614903                                                                                                                                                                                                                                                                                                                                                                                                                                                                                                                                                                                                                                                                                                                                                                                                                                                                                                                                                                                                                                                                                                                                                                                                                                                                                                                                                                                                                                                                                                                                                                                                                                                                                                                                                                                                                                                                                                                                                                                                                                                                                                                                                                                                                                                                                                                                                                                                                                                                                                                                                                                                                                                                                                                                                                                                                                                                                                                                                                                                                            | see above                                                          | Fulgent Genetics                                                                          | Centers for Disease Control and Prevention Division of Viral Diseases, Pathogen Discovery                                                                                                                                                                                                                                                                                                                                                                                                                                                                                                                                                                                                                              | Dakota Howard, Dhvani Batra, Peter W. Cook, Kara Moser, Adrian Paskey, Jason Caravas, Benjamin Rambo-Martin, Shatavia Morrison, Christopher Gulvick, Scott Sammons, Yvette Unoarumhi, Darlene Wagner, Matthew Schmeier, Harry Gao, Mickey Li, John Gao, Joseph Fierro, Benafsh Sapra, Becky Tsai, Yan Meng, Doreen Ng, James Xie, Clinton R. Paden, Duncan MacCannell                                                                                                                                                                                                                                                                                                                                                                                                                                                                                                                                                                                                                                                                             |
| EPI_ISL_1614967, EPI_ISL_1615009, EPI_ISL_1615021, EPI_ISL_1615039                                                                                                                                                                                                                                                                                                                                                                                                                                                                                                                                                                                                                                                                                                                                                                                                                                                                                                                                                                                                                                                                                                                                                                                                                                                                                                                                                                                                                                                                                                                                                                                                                                                                                                                                                                                                                                                                                                                                                                                                                                                                                                                                                                                                                                                                                                                                                                                                                                                                                                                                                                                                                                                                                                                                                                                                                                                                                                                                                                                                                                                                                                                                                                                                                                                                                                                                                                                                                                                                                                       | Quest Diagnostics Incorporated                                     | Centers for Disease Control and Prevention Division of Viral Diseases, Pathogen Discovery | Dakota Howard, Dhvani Batra, Peter W. Cook, Kara Moser, Adrian Paskey, Jason Caravas, Benjamin Rambo-Martin, Shatavia Morrison, Christopher Gulvick, Scott Sammons, Yvette Unoarumhi, Darlene Wagner, Matthew Schmeier, S. H. Rosenthal, A. Gerasimova, R. M. Kagan, B. Anderson, M. Hua, Y. Liu, L.E. Bernstein, K.E. Livingston, A. Perez, I. A. Shlyakhter, R. V. Rolando, R. Owen, P. Tanpaiboon, F. Lacbawan, Clinton R. Paden, Duncan MacCannell                                                                                                                                                                                                                                                                 |                                                                                                                                                                                                                                                                                                                                                                                                                                                                                                                                                                                                                                                                                                                                                                                                                                                                                                                                                                                                                                                   |
| EPI_ISL_1615154, EPI_ISL_1615256, EPI_ISL_1615414, EPI_ISL_1615468                                                                                                                                                                                                                                                                                                                                                                                                                                                                                                                                                                                                                                                                                                                                                                                                                                                                                                                                                                                                                                                                                                                                                                                                                                                                                                                                                                                                                                                                                                                                                                                                                                                                                                                                                                                                                                                                                                                                                                                                                                                                                                                                                                                                                                                                                                                                                                                                                                                                                                                                                                                                                                                                                                                                                                                                                                                                                                                                                                                                                                                                                                                                                                                                                                                                                                                                                                                                                                                                                                       | Helix/Illumina                                                     | Centers for Disease Control and Prevention Division of Viral Diseases, Pathogen Discovery | Dakota Howard, Dhvani Batra, Peter W. Cook, Kara Moser, Adrian Paskey, Jason Caravas, Benjamin Rambo-Martin, Shatavia Morrison, Christopher Gulvick, Scott Sammons, Yvette Unoarumhi, Darlene Wagner, Matthew Schmeier, Eileen de Feo, Jan Antico, Christine Tran, Matthew Tolentino, Shannon Wickline, Kim Gietzen, Brad Sickler, Jingtao Liu, Eric Allen, Phil Febbo, Nicole L. Washington, Simon White, Geraint Levan, Kelly Schiabor Barrett, Elizabeth Cirulli, Alexandre Bolze, Ary Ascencio, Charlotte Rivera-Garcia, Ryan Cho, Jason Nguyen, Sherry Wang, Jimmy Ramirez, Tyler Cassens, Efen Sandoval, Magnus Isaksson, William Lee, David Becker, Marc Laurent, James Lu, Clinton R. Paden, Duncan MacCannell |                                                                                                                                                                                                                                                                                                                                                                                                                                                                                                                                                                                                                                                                                                                                                                                                                                                                                                                                                                                                                                                   |
| EPI_ISL_1620452                                                                                                                                                                                                                                                                                                                                                                                                                                                                                                                                                                                                                                                                                                                                                                                                                                                                                                                                                                                                                                                                                                                                                                                                                                                                                                                                                                                                                                                                                                                                                                                                                                                                                                                                                                                                                                                                                                                                                                                                                                                                                                                                                                                                                                                                                                                                                                                                                                                                                                                                                                                                                                                                                                                                                                                                                                                                                                                                                                                                                                                                                                                                                                                                                                                                                                                                                                                                                                                                                                                                                          | National Virus Reference Laboratory                                | National Virus Reference Laboratory                                                       | Zoe Yandle, Charlene Bennett, Gabriel Gonzalez, Michael Carr, Jonathan Dean, Cillian F De Gascun                                                                                                                                                                                                                                                                                                                                                                                                                                                                                                                                                                                                                       |                                                                                                                                                                                                                                                                                                                                                                                                                                                                                                                                                                                                                                                                                                                                                                                                                                                                                                                                                                                                                                                   |
| EPI_ISL_1620596, EPI_ISL_1620598, EPI_ISL_1620607                                                                                                                                                                                                                                                                                                                                                                                                                                                                                                                                                                                                                                                                                                                                                                                                                                                                                                                                                                                                                                                                                                                                                                                                                                                                                                                                                                                                                                                                                                                                                                                                                                                                                                                                                                                                                                                                                                                                                                                                                                                                                                                                                                                                                                                                                                                                                                                                                                                                                                                                                                                                                                                                                                                                                                                                                                                                                                                                                                                                                                                                                                                                                                                                                                                                                                                                                                                                                                                                                                                        | Puerto Rico Department of Health                                   | Centers for Disease Control and Prevention, Dengue Branch                                 | Gilberto A. Santiago, Glenda Gonzalez, Betzabel Flores, Keyla Charriez, Gabriela Paz-Bailey, Jorge L. Munoz-Jordan                                                                                                                                                                                                                                                                                                                                                                                                                                                                                                                                                                                                     |                                                                                                                                                                                                                                                                                                                                                                                                                                                                                                                                                                                                                                                                                                                                                                                                                                                                                                                                                                                                                                                   |
| EPI_ISL_1620677                                                                                                                                                                                                                                                                                                                                                                                                                                                                                                                                                                                                                                                                                                                                                                                                                                                                                                                                                                                                                                                                                                                                                                                                                                                                                                                                                                                                                                                                                                                                                                                                                                                                                                                                                                                                                                                                                                                                                                                                                                                                                                                                                                                                                                                                                                                                                                                                                                                                                                                                                                                                                                                                                                                                                                                                                                                                                                                                                                                                                                                                                                                                                                                                                                                                                                                                                                                                                                                                                                                                                          | North Dakota Department of Health, Public Health Laboratory        | North Dakota Department of Health, Public Health Laboratory                               | Lisa Wingerter                                                                                                                                                                                                                                                                                                                                                                                                                                                                                                                                                                                                                                                                                                         |                                                                                                                                                                                                                                                                                                                                                                                                                                                                                                                                                                                                                                                                                                                                                                                                                                                                                                                                                                                                                                                   |
| EPI_ISL_1621723, EPI_ISL_1621856, EPI_ISL_1621871, EPI_ISL_1621875, EPI_ISL_1621879, EPI_ISL_1621880, EPI_ISL_1621883, EPI_ISL_1621906, EPI_ISL_1621921, EPI_ISL_1621928, EPI_ISL_1621929, EPI_ISL_1621934, EPI_ISL_1621942, EPI_ISL_1621958, EPI_ISL_1621992, EPI_ISL_1622003, EPI_ISL_1622030, EPI_ISL_1622032, EPI_ISL_1622076, EPI_ISL_1622095, EPI_ISL_1622103                                                                                                                                                                                                                                                                                                                                                                                                                                                                                                                                                                                                                                                                                                                                                                                                                                                                                                                                                                                                                                                                                                                                                                                                                                                                                                                                                                                                                                                                                                                                                                                                                                                                                                                                                                                                                                                                                                                                                                                                                                                                                                                                                                                                                                                                                                                                                                                                                                                                                                                                                                                                                                                                                                                                                                                                                                                                                                                                                                                                                                                                                                                                                                                                      | see above                                                          | Quest Diagnostics Incorporated                                                            | Centers for Disease Control and Prevention Division of Viral Diseases, Pathogen Discovery                                                                                                                                                                                                                                                                                                                                                                                                                                                                                                                                                                                                                              | Dakota Howard, Dhvani Batra, Peter W. Cook, Kara Moser, Adrian Paskey, Jason Caravas, Benjamin Rambo-Martin, Shatavia Morrison, Christopher Gulvick, Scott Sammons, Yvette Unoarumhi, Darlene Wagner, Matthew Schmeier, S. H. Rosenthal, A. Gerasimova, R. M. Kagan, B. Anderson, M. Hua, Y. Liu, L.E. Bernstein, K.E. Livingston, A. Perez, I. A. Shlyakhter, R. V. Rolando, R. Owen, P. Tanpaiboon, F. Lacbawan, Clinton R. Paden, Duncan MacCannell                                                                                                                                                                                                                                                                                                                                                                                                                                                                                                                                                                                            |
| EPI_ISL_1623702                                                                                                                                                                                                                                                                                                                                                                                                                                                                                                                                                                                                                                                                                                                                                                                                                                                                                                                                                                                                                                                                                                                                                                                                                                                                                                                                                                                                                                                                                                                                                                                                                                                                                                                                                                                                                                                                                                                                                                                                                                                                                                                                                                                                                                                                                                                                                                                                                                                                                                                                                                                                                                                                                                                                                                                                                                                                                                                                                                                                                                                                                                                                                                                                                                                                                                                                                                                                                                                                                                                                                          | Oregon State Public Health Laboratory                              | Oregon State Public Health Laboratory                                                     | Rafia Razaqque, Eugene Yeboah, Vanda Makris, Laura Tsaknaridis, John Fontana and Shane Sevey                                                                                                                                                                                                                                                                                                                                                                                                                                                                                                                                                                                                                           |                                                                                                                                                                                                                                                                                                                                                                                                                                                                                                                                                                                                                                                                                                                                                                                                                                                                                                                                                                                                                                                   |
| EPI_ISL_1623955, EPI_ISL_1623956, EPI_ISL_1623960, EPI_ISL_1623963, EPI_ISL_1623965, EPI_ISL_1623967, EPI_ISL_1623968, EPI_ISL_1623971                                                                                                                                                                                                                                                                                                                                                                                                                                                                                                                                                                                                                                                                                                                                                                                                                                                                                                                                                                                                                                                                                                                                                                                                                                                                                                                                                                                                                                                                                                                                                                                                                                                                                                                                                                                                                                                                                                                                                                                                                                                                                                                                                                                                                                                                                                                                                                                                                                                                                                                                                                                                                                                                                                                                                                                                                                                                                                                                                                                                                                                                                                                                                                                                                                                                                                                                                                                                                                   | MONTEFIORE MEDICAL CENTER LABORATORIES                             | Wadsworth Center, New York State Department of Health                                     | Kirsten St. George, Daryl M. Lamson, Alexis Russell, Matthew Shudt, Melissa A Leisner, Jonathan Plitnick, Catharine Prussing, Navjot Singh, John Kelly, Erasmus Schneider, Erica Lasek-Nesselquist                                                                                                                                                                                                                                                                                                                                                                                                                                                                                                                     |                                                                                                                                                                                                                                                                                                                                                                                                                                                                                                                                                                                                                                                                                                                                                                                                                                                                                                                                                                                                                                                   |
| EPI_ISL_1623973                                                                                                                                                                                                                                                                                                                                                                                                                                                                                                                                                                                                                                                                                                                                                                                                                                                                                                                                                                                                                                                                                                                                                                                                                                                                                                                                                                                                                                                                                                                                                                                                                                                                                                                                                                                                                                                                                                                                                                                                                                                                                                                                                                                                                                                                                                                                                                                                                                                                                                                                                                                                                                                                                                                                                                                                                                                                                                                                                                                                                                                                                                                                                                                                                                                                                                                                                                                                                                                                                                                                                          | NYC Pandemic Response Lab                                          | Wadsworth Center, New York State Department of Health                                     | Kirsten St. George, Daryl M. Lamson, Alexis Russell, Matthew Shudt, Melissa A Leisner, Jonathan Plitnick, Catharine Prussing, Navjot Singh, John Kelly, Erasmus Schneider, Erica Lasek-Nesselquist                                                                                                                                                                                                                                                                                                                                                                                                                                                                                                                     |                                                                                                                                                                                                                                                                                                                                                                                                                                                                                                                                                                                                                                                                                                                                                                                                                                                                                                                                                                                                                                                   |
| EPI_ISL_1623975, EPI_ISL_1623977, EPI_ISL_1623979, EPI_ISL_1623983, EPI_ISL_1623984, EPI_ISL_1623987, EPI_ISL_1623988                                                                                                                                                                                                                                                                                                                                                                                                                                                                                                                                                                                                                                                                                                                                                                                                                                                                                                                                                                                                                                                                                                                                                                                                                                                                                                                                                                                                                                                                                                                                                                                                                                                                                                                                                                                                                                                                                                                                                                                                                                                                                                                                                                                                                                                                                                                                                                                                                                                                                                                                                                                                                                                                                                                                                                                                                                                                                                                                                                                                                                                                                                                                                                                                                                                                                                                                                                                                                                                    | MONTEFIORE MEDICAL CENTER LABORATORIES                             | Wadsworth Center, New York State Department of Health                                     | Kirsten St. George, Daryl M. Lamson, Alexis Russell, Matthew Shudt, Melissa A Leisner, Jonathan Plitnick, Catharine Prussing, Navjot Singh, John Kelly, Erasmus Schneider, Erica Lasek-Nesselquist                                                                                                                                                                                                                                                                                                                                                                                                                                                                                                                     |                                                                                                                                                                                                                                                                                                                                                                                                                                                                                                                                                                                                                                                                                                                                                                                                                                                                                                                                                                                                                                                   |
| EPI_ISL_1623994, EPI_ISL_1623997                                                                                                                                                                                                                                                                                                                                                                                                                                                                                                                                                                                                                                                                                                                                                                                                                                                                                                                                                                                                                                                                                                                                                                                                                                                                                                                                                                                                                                                                                                                                                                                                                                                                                                                                                                                                                                                                                                                                                                                                                                                                                                                                                                                                                                                                                                                                                                                                                                                                                                                                                                                                                                                                                                                                                                                                                                                                                                                                                                                                                                                                                                                                                                                                                                                                                                                                                                                                                                                                                                                                         | MEMORIAL SLOAN KETTERING CANCER CENTER                             | Wadsworth Center, New York State Department of Health                                     | Kirsten St. George, Daryl M. Lamson, Alexis Russell, Matthew Shudt, Melissa A Leisner, Jonathan Plitnick, Catharine Prussing, Navjot Singh, John Kelly, Erasmus Schneider, Erica Lasek-Nesselquist                                                                                                                                                                                                                                                                                                                                                                                                                                                                                                                     |                                                                                                                                                                                                                                                                                                                                                                                                                                                                                                                                                                                                                                                                                                                                                                                                                                                                                                                                                                                                                                                   |
| EPI_ISL_1624010                                                                                                                                                                                                                                                                                                                                                                                                                                                                                                                                                                                                                                                                                                                                                                                                                                                                                                                                                                                                                                                                                                                                                                                                                                                                                                                                                                                                                                                                                                                                                                                                                                                                                                                                                                                                                                                                                                                                                                                                                                                                                                                                                                                                                                                                                                                                                                                                                                                                                                                                                                                                                                                                                                                                                                                                                                                                                                                                                                                                                                                                                                                                                                                                                                                                                                                                                                                                                                                                                                                                                          | Columbia University Irving Medical Center                          | Wadsworth Center, New York State Department of Health                                     | Kirsten St. George, Daryl M. Lamson, Alexis Russell, Matthew Shudt, Melissa A Leisner, Jonathan Plitnick, Catharine Prussing, Navjot Singh, John Kelly, Erasmus Schneider, Erica Lasek-Nesselquist                                                                                                                                                                                                                                                                                                                                                                                                                                                                                                                     |                                                                                                                                                                                                                                                                                                                                                                                                                                                                                                                                                                                                                                                                                                                                                                                                                                                                                                                                                                                                                                                   |
| EPI_ISL_1624015, EPI_ISL_1624023, EPI_ISL_1624029, EPI_ISL_1624066, EPI_ISL_1624073                                                                                                                                                                                                                                                                                                                                                                                                                                                                                                                                                                                                                                                                                                                                                                                                                                                                                                                                                                                                                                                                                                                                                                                                                                                                                                                                                                                                                                                                                                                                                                                                                                                                                                                                                                                                                                                                                                                                                                                                                                                                                                                                                                                                                                                                                                                                                                                                                                                                                                                                                                                                                                                                                                                                                                                                                                                                                                                                                                                                                                                                                                                                                                                                                                                                                                                                                                                                                                                                                      | New York Presbyterian Hospital                                     | Wadsworth Center, New York State Department of Health                                     | Kirsten St. George, Daryl M. Lamson, Alexis Russell, Matthew Shudt, Melissa A Leisner, Jonathan Plitnick, Catharine Prussing, Navjot Singh, John Kelly, Erasmus Schneider, Erica Lasek-Nesselquist                                                                                                                                                                                                                                                                                                                                                                                                                                                                                                                     |                                                                                                                                                                                                                                                                                                                                                                                                                                                                                                                                                                                                                                                                                                                                                                                                                                                                                                                                                                                                                                                   |
| EPI_ISL_1624086                                                                                                                                                                                                                                                                                                                                                                                                                                                                                                                                                                                                                                                                                                                                                                                                                                                                                                                                                                                                                                                                                                                                                                                                                                                                                                                                                                                                                                                                                                                                                                                                                                                                                                                                                                                                                                                                                                                                                                                                                                                                                                                                                                                                                                                                                                                                                                                                                                                                                                                                                                                                                                                                                                                                                                                                                                                                                                                                                                                                                                                                                                                                                                                                                                                                                                                                                                                                                                                                                                                                                          | NYC Pandemic Response Lab                                          | Wadsworth Center, New York State Department of Health                                     | Kirsten St. George, Daryl M. Lamson, Alexis Russell, Matthew Shudt, Melissa A Leisner, Jonathan Plitnick, Catharine Prussing, Navjot Singh, John Kelly, Erasmus Schneider, Erica Lasek-Nesselquist                                                                                                                                                                                                                                                                                                                                                                                                                                                                                                                     |                                                                                                                                                                                                                                                                                                                                                                                                                                                                                                                                                                                                                                                                                                                                                                                                                                                                                                                                                                                                                                                   |
| EPI_ISL_1624167                                                                                                                                                                                                                                                                                                                                                                                                                                                                                                                                                                                                                                                                                                                                                                                                                                                                                                                                                                                                                                                                                                                                                                                                                                                                                                                                                                                                                                                                                                                                                                                                                                                                                                                                                                                                                                                                                                                                                                                                                                                                                                                                                                                                                                                                                                                                                                                                                                                                                                                                                                                                                                                                                                                                                                                                                                                                                                                                                                                                                                                                                                                                                                                                                                                                                                                                                                                                                                                                                                                                                          | Illinois Department of Public Health - Springfield Lab             | Illinois Department of Public Health - Springfield Lab                                    | Bryan Sim, Gordon McCall                                                                                                                                                                                                                                                                                                                                                                                                                                                                                                                                                                                                                                                                                               |                                                                                                                                                                                                                                                                                                                                                                                                                                                                                                                                                                                                                                                                                                                                                                                                                                                                                                                                                                                                                                                   |

|                                                                                                                                                                                                                                                                                                                                                                                                                                                                                                                                                                                                                                                                                                                                                                                                                                                                                                                                                                                                                                                                                                                                                                                                                                                                                                                                                                                                                                                                                                                                                                                                                                                                                                                                                                                                                                                                                                                                                                                                                                                                                                                                                                                                                                                                                                                                                                                                                                                                                                                                                                                                                                                                                                                                                                                                                                                                  |                                                                                                             |                                                                                           |                                                                                                                                                                                                                                                                                                                                                                                                                                                         |
|------------------------------------------------------------------------------------------------------------------------------------------------------------------------------------------------------------------------------------------------------------------------------------------------------------------------------------------------------------------------------------------------------------------------------------------------------------------------------------------------------------------------------------------------------------------------------------------------------------------------------------------------------------------------------------------------------------------------------------------------------------------------------------------------------------------------------------------------------------------------------------------------------------------------------------------------------------------------------------------------------------------------------------------------------------------------------------------------------------------------------------------------------------------------------------------------------------------------------------------------------------------------------------------------------------------------------------------------------------------------------------------------------------------------------------------------------------------------------------------------------------------------------------------------------------------------------------------------------------------------------------------------------------------------------------------------------------------------------------------------------------------------------------------------------------------------------------------------------------------------------------------------------------------------------------------------------------------------------------------------------------------------------------------------------------------------------------------------------------------------------------------------------------------------------------------------------------------------------------------------------------------------------------------------------------------------------------------------------------------------------------------------------------------------------------------------------------------------------------------------------------------------------------------------------------------------------------------------------------------------------------------------------------------------------------------------------------------------------------------------------------------------------------------------------------------------------------------------------------------|-------------------------------------------------------------------------------------------------------------|-------------------------------------------------------------------------------------------|---------------------------------------------------------------------------------------------------------------------------------------------------------------------------------------------------------------------------------------------------------------------------------------------------------------------------------------------------------------------------------------------------------------------------------------------------------|
| EPI_ISL_1624487                                                                                                                                                                                                                                                                                                                                                                                                                                                                                                                                                                                                                                                                                                                                                                                                                                                                                                                                                                                                                                                                                                                                                                                                                                                                                                                                                                                                                                                                                                                                                                                                                                                                                                                                                                                                                                                                                                                                                                                                                                                                                                                                                                                                                                                                                                                                                                                                                                                                                                                                                                                                                                                                                                                                                                                                                                                  | CHAMPLAIN VALLEY PHYSICIANS HOSPITAL MEDICAL CENTER                                                         | Wadsworth Center, New York State Department of Health                                     | Kirsten St. George, Daryl M. Lamson, Alexis Russell, Matthew Shudt, Melissa A Leisner, Jonathan Plitnick, Catharine Prussing, Navjot Singh, John Kelly, Erasmus Schneider, Erica Lasek-Nesselquist                                                                                                                                                                                                                                                      |
| EPI_ISL_1624704                                                                                                                                                                                                                                                                                                                                                                                                                                                                                                                                                                                                                                                                                                                                                                                                                                                                                                                                                                                                                                                                                                                                                                                                                                                                                                                                                                                                                                                                                                                                                                                                                                                                                                                                                                                                                                                                                                                                                                                                                                                                                                                                                                                                                                                                                                                                                                                                                                                                                                                                                                                                                                                                                                                                                                                                                                                  | Massachusetts State Public Health Laboratory                                                                | Massachusetts State Public Health Laboratory                                              | Andrew Lang, Timelia Fink, Glen Gallagher, Sandra Smole                                                                                                                                                                                                                                                                                                                                                                                                 |
| EPI_ISL_1625544, EPI_ISL_1625616, EPI_ISL_1625617, EPI_ISL_1625618, EPI_ISL_1625619, EPI_ISL_1625620, EPI_ISL_1625621, EPI_ISL_1625622, EPI_ISL_1625623, EPI_ISL_1625624, EPI_ISL_1625644, EPI_ISL_1625645, EPI_ISL_1625646, EPI_ISL_1625647, EPI_ISL_1625648, EPI_ISL_1625649, EPI_ISL_1625650, EPI_ISL_1625651, EPI_ISL_1625653, EPI_ISL_1625654, EPI_ISL_1625655, EPI_ISL_1625656, EPI_ISL_1625657, EPI_ISL_1625659, EPI_ISL_1625661                                                                                                                                                                                                                                                                                                                                                                                                                                                                                                                                                                                                                                                                                                                                                                                                                                                                                                                                                                                                                                                                                                                                                                                                                                                                                                                                                                                                                                                                                                                                                                                                                                                                                                                                                                                                                                                                                                                                                                                                                                                                                                                                                                                                                                                                                                                                                                                                                          |                                                                                                             |                                                                                           |                                                                                                                                                                                                                                                                                                                                                                                                                                                         |
| see above                                                                                                                                                                                                                                                                                                                                                                                                                                                                                                                                                                                                                                                                                                                                                                                                                                                                                                                                                                                                                                                                                                                                                                                                                                                                                                                                                                                                                                                                                                                                                                                                                                                                                                                                                                                                                                                                                                                                                                                                                                                                                                                                                                                                                                                                                                                                                                                                                                                                                                                                                                                                                                                                                                                                                                                                                                                        | The Jackson Laboratory                                                                                      | The Jackson Laboratory                                                                    | Bergeron D, Renzette N, Adams M, Omerza G, Kelly K, Long J, Li L                                                                                                                                                                                                                                                                                                                                                                                        |
| EPI_ISL_1625773                                                                                                                                                                                                                                                                                                                                                                                                                                                                                                                                                                                                                                                                                                                                                                                                                                                                                                                                                                                                                                                                                                                                                                                                                                                                                                                                                                                                                                                                                                                                                                                                                                                                                                                                                                                                                                                                                                                                                                                                                                                                                                                                                                                                                                                                                                                                                                                                                                                                                                                                                                                                                                                                                                                                                                                                                                                  | Pathology and Laboratory Medicine Institute, Cleveland Clinic, Ohio, USA                                    | Pathology and Laboratory Medicine Institute, Cleveland Clinic, Ohio, USA                  | Jennifer Starbuck, Joy Nakitandwe, Kristen McDonnell, David Plunkett, Zheng Jin Tu, Jay Brock, Yu-Wei Cheng, Gary Procop, Daniel Rhoads, Daniel H. Farkas, David Bosler                                                                                                                                                                                                                                                                                 |
| EPI_ISL_1625849, EPI_ISL_1625850, EPI_ISL_1625857, EPI_ISL_1625859, EPI_ISL_1625869, EPI_ISL_1625870, EPI_ISL_1625883, EPI_ISL_1625906, EPI_ISL_1625911                                                                                                                                                                                                                                                                                                                                                                                                                                                                                                                                                                                                                                                                                                                                                                                                                                                                                                                                                                                                                                                                                                                                                                                                                                                                                                                                                                                                                                                                                                                                                                                                                                                                                                                                                                                                                                                                                                                                                                                                                                                                                                                                                                                                                                                                                                                                                                                                                                                                                                                                                                                                                                                                                                          | NJDOH, Public Health and Environmental Laboratories                                                         | NJ_PHEL                                                                                   | Lindsey Bodnar, Shiv K. Verma, Jacquelyn Deverell, Matthew Scarnati, Mohammad M Ali, Dana Woell, Byeong Jeong                                                                                                                                                                                                                                                                                                                                           |
| EPI_ISL_1626322                                                                                                                                                                                                                                                                                                                                                                                                                                                                                                                                                                                                                                                                                                                                                                                                                                                                                                                                                                                                                                                                                                                                                                                                                                                                                                                                                                                                                                                                                                                                                                                                                                                                                                                                                                                                                                                                                                                                                                                                                                                                                                                                                                                                                                                                                                                                                                                                                                                                                                                                                                                                                                                                                                                                                                                                                                                  | Wisconsin State Laboratory of Hygiene Communicable Disease Division                                         | Wisconsin State Laboratory of Hygiene Communicable Disease Division                       | Kelsey R. Florek, Abigail C. Shockey                                                                                                                                                                                                                                                                                                                                                                                                                    |
| EPI_ISL_1626595                                                                                                                                                                                                                                                                                                                                                                                                                                                                                                                                                                                                                                                                                                                                                                                                                                                                                                                                                                                                                                                                                                                                                                                                                                                                                                                                                                                                                                                                                                                                                                                                                                                                                                                                                                                                                                                                                                                                                                                                                                                                                                                                                                                                                                                                                                                                                                                                                                                                                                                                                                                                                                                                                                                                                                                                                                                  | IN State Department of Health Laboratory Services                                                           | IN State Department of Health Laboratory Services                                         | Cassandra Campion, Jamie Yeadon, Brian Pope, Lixia Liu, Kyle Brownlee, Melissa Hindenlang, Ankita Kashikar, Mark Glazier                                                                                                                                                                                                                                                                                                                                |
| EPI_ISL_1627276                                                                                                                                                                                                                                                                                                                                                                                                                                                                                                                                                                                                                                                                                                                                                                                                                                                                                                                                                                                                                                                                                                                                                                                                                                                                                                                                                                                                                                                                                                                                                                                                                                                                                                                                                                                                                                                                                                                                                                                                                                                                                                                                                                                                                                                                                                                                                                                                                                                                                                                                                                                                                                                                                                                                                                                                                                                  | North Dakota Department of Health, Public Health Laboratory                                                 | North Dakota Department of Health, Public Health Laboratory                               | Lisa Wingerter                                                                                                                                                                                                                                                                                                                                                                                                                                          |
| EPI_ISL_1627313                                                                                                                                                                                                                                                                                                                                                                                                                                                                                                                                                                                                                                                                                                                                                                                                                                                                                                                                                                                                                                                                                                                                                                                                                                                                                                                                                                                                                                                                                                                                                                                                                                                                                                                                                                                                                                                                                                                                                                                                                                                                                                                                                                                                                                                                                                                                                                                                                                                                                                                                                                                                                                                                                                                                                                                                                                                  | Idaho Bureau of Laboratories                                                                                | Idaho Bureau of Laboratories                                                              | R. Beukelman, Matthew Charles Burns, Aimee Ceniseros, Robert L. Voermans, Christopher Ball                                                                                                                                                                                                                                                                                                                                                              |
| EPI_ISL_1628494, EPI_ISL_1628495, EPI_ISL_1628496                                                                                                                                                                                                                                                                                                                                                                                                                                                                                                                                                                                                                                                                                                                                                                                                                                                                                                                                                                                                                                                                                                                                                                                                                                                                                                                                                                                                                                                                                                                                                                                                                                                                                                                                                                                                                                                                                                                                                                                                                                                                                                                                                                                                                                                                                                                                                                                                                                                                                                                                                                                                                                                                                                                                                                                                                | University of Mississippi Medical Center, Department of Pathology                                           | University of Mississippi Medical Center, Molecular and Genomics Core Facility            | Ashley C. Johnson, Ithiel J. Frame, Krishna K. Ayyalomasayajula, Michael R. Garrett, D. Ashley Robinson                                                                                                                                                                                                                                                                                                                                                 |
| EPI_ISL_1628685                                                                                                                                                                                                                                                                                                                                                                                                                                                                                                                                                                                                                                                                                                                                                                                                                                                                                                                                                                                                                                                                                                                                                                                                                                                                                                                                                                                                                                                                                                                                                                                                                                                                                                                                                                                                                                                                                                                                                                                                                                                                                                                                                                                                                                                                                                                                                                                                                                                                                                                                                                                                                                                                                                                                                                                                                                                  | Baylor Scott & White - Temple                                                                               | Baylor Scott & White - Temple                                                             | Ari Rao, Linden Morales, Kimberly Walker, Marcus Volz, Shelby Hendrickson, Caitlin Maloney                                                                                                                                                                                                                                                                                                                                                              |
| EPI_ISL_1632695                                                                                                                                                                                                                                                                                                                                                                                                                                                                                                                                                                                                                                                                                                                                                                                                                                                                                                                                                                                                                                                                                                                                                                                                                                                                                                                                                                                                                                                                                                                                                                                                                                                                                                                                                                                                                                                                                                                                                                                                                                                                                                                                                                                                                                                                                                                                                                                                                                                                                                                                                                                                                                                                                                                                                                                                                                                  | Virginia Division of Consolidated Laboratory Services                                                       | Virginia Division of Consolidated Laboratory Services                                     | Virginia DCLS                                                                                                                                                                                                                                                                                                                                                                                                                                           |
| EPI_ISL_1633254, EPI_ISL_1633255, EPI_ISL_1633257, EPI_ISL_1633258                                                                                                                                                                                                                                                                                                                                                                                                                                                                                                                                                                                                                                                                                                                                                                                                                                                                                                                                                                                                                                                                                                                                                                                                                                                                                                                                                                                                                                                                                                                                                                                                                                                                                                                                                                                                                                                                                                                                                                                                                                                                                                                                                                                                                                                                                                                                                                                                                                                                                                                                                                                                                                                                                                                                                                                               | Pathology and Laboratory Medicine Institute, Cleveland Clinic, Ohio, USA                                    | Pathology and Laboratory Medicine Institute, Cleveland Clinic, Ohio, USA                  | Concetta Peck, Joy Nakitandwe, Kristen McDonnell, David Plunkett, Zheng Jin Tu, Jay Brock, Yu-Wei Cheng, Gary Procop, Daniel Rhoads, Daniel H. Farkas, David Bosler                                                                                                                                                                                                                                                                                     |
| EPI_ISL_1633492                                                                                                                                                                                                                                                                                                                                                                                                                                                                                                                                                                                                                                                                                                                                                                                                                                                                                                                                                                                                                                                                                                                                                                                                                                                                                                                                                                                                                                                                                                                                                                                                                                                                                                                                                                                                                                                                                                                                                                                                                                                                                                                                                                                                                                                                                                                                                                                                                                                                                                                                                                                                                                                                                                                                                                                                                                                  | Genetica Molecular and Subdepartamento de Virologia ISP Chile                                               | Instituto de Salud Publica de Chile                                                       | Javier Tognarelli, Karen Orostica, Barbara Parra, Loredana Arata, Jaime Lagos, Gisselle Barra, Patricia Bustos, Rodrigo Fasce, Andres Castillo, Jorge Fernandez                                                                                                                                                                                                                                                                                         |
| EPI_ISL_1633686, EPI_ISL_1633687, EPI_ISL_1633699, EPI_ISL_1633704, EPI_ISL_1633724, EPI_ISL_1633732, EPI_ISL_1633742, EPI_ISL_1633744, EPI_ISL_1633746, EPI_ISL_1633761, EPI_ISL_1633762, EPI_ISL_1633767, EPI_ISL_1633779, EPI_ISL_1633781, EPI_ISL_1633786, EPI_ISL_1633791, EPI_ISL_1633792, EPI_ISL_1633793, EPI_ISL_1633797, EPI_ISL_1633799, EPI_ISL_1633804, EPI_ISL_1633820, EPI_ISL_1633827, EPI_ISL_1633832, EPI_ISL_1633843, EPI_ISL_1633844, EPI_ISL_1633855, EPI_ISL_1633872, EPI_ISL_1633892, EPI_ISL_1633899, EPI_ISL_1633911, EPI_ISL_1633914, EPI_ISL_1633921, EPI_ISL_1633949, EPI_ISL_1633975, EPI_ISL_1633992, EPI_ISL_1633997, EPI_ISL_1634001, EPI_ISL_1634021, EPI_ISL_1634032, EPI_ISL_1634034, EPI_ISL_1634052, EPI_ISL_1634060, EPI_ISL_1634068, EPI_ISL_1634074, EPI_ISL_1634077, EPI_ISL_1634079, EPI_ISL_1634080, EPI_ISL_1634086, EPI_ISL_1634093, EPI_ISL_1634100, EPI_ISL_1634110, EPI_ISL_1634113, EPI_ISL_1634118, EPI_ISL_1634123, EPI_ISL_1634135, EPI_ISL_1634152, EPI_ISL_1634157, EPI_ISL_1634161, EPI_ISL_1634162, EPI_ISL_1634171, EPI_ISL_1634180, EPI_ISL_1634182, EPI_ISL_1634187, EPI_ISL_1634188, EPI_ISL_1634191, EPI_ISL_1634194, EPI_ISL_1634200, EPI_ISL_1634203, EPI_ISL_1634204, EPI_ISL_1634205, EPI_ISL_1634210, EPI_ISL_1634214, EPI_ISL_1634215, EPI_ISL_1634222, EPI_ISL_1634224, EPI_ISL_1634253, EPI_ISL_1634261, EPI_ISL_1634267, EPI_ISL_1634271, EPI_ISL_1634307, EPI_ISL_1634311, EPI_ISL_1634313, EPI_ISL_1634322, EPI_ISL_1634323, EPI_ISL_1634328, EPI_ISL_1634330                                                                                                                                                                                                                                                                                                                                                                                                                                                                                                                                                                                                                                                                                                                                                                                                                                                                                                                                                                                                                                                                                                                                                                                                                                                                                                                            |                                                                                                             |                                                                                           |                                                                                                                                                                                                                                                                                                                                                                                                                                                         |
| see above                                                                                                                                                                                                                                                                                                                                                                                                                                                                                                                                                                                                                                                                                                                                                                                                                                                                                                                                                                                                                                                                                                                                                                                                                                                                                                                                                                                                                                                                                                                                                                                                                                                                                                                                                                                                                                                                                                                                                                                                                                                                                                                                                                                                                                                                                                                                                                                                                                                                                                                                                                                                                                                                                                                                                                                                                                                        | Pandemic Response Lab - NYC                                                                                 | Pandemic Response Lab, R&D                                                                | Henry Lee, Michael Hammerling, Melissa Hopkins, Cybill del Castillo, Shinyoung Clair Kang, William Ward, Pradeep Bugga, Sol Rey, Dylan Law, Katharine Nelson, Haiping Hao, Jon Laurent                                                                                                                                                                                                                                                                  |
| EPI_ISL_1635351                                                                                                                                                                                                                                                                                                                                                                                                                                                                                                                                                                                                                                                                                                                                                                                                                                                                                                                                                                                                                                                                                                                                                                                                                                                                                                                                                                                                                                                                                                                                                                                                                                                                                                                                                                                                                                                                                                                                                                                                                                                                                                                                                                                                                                                                                                                                                                                                                                                                                                                                                                                                                                                                                                                                                                                                                                                  | Lighthouse Lab in Cambridge                                                                                 | Wellcome Sanger Institute for the COVID-19 Genomics UK (COG-UK) Consortium                | Rob Howes, The Lighthouse Lab in Cambridge and Alex Alderton, Roberto Amato, Jeffrey Barrett, Sonia Goncalves, Ewan Harrison, David K. Jackson, Ian Johnston, Dominic Kwiatkowski, Cordelia Langford, John Sillitoe on behalf of the Wellcome Sanger Institute COVID-19 Surveillance Team                                                                                                                                                               |
| EPI_ISL_1635451, EPI_ISL_1635463, EPI_ISL_1635466, EPI_ISL_1635476, EPI_ISL_1635479, EPI_ISL_1635485, EPI_ISL_1635488, EPI_ISL_1635494, EPI_ISL_1635499, EPI_ISL_1635504, EPI_ISL_1635508, EPI_ISL_1635511, EPI_ISL_1635527, EPI_ISL_1635546, EPI_ISL_1635547, EPI_ISL_1635551, EPI_ISL_1635565, EPI_ISL_1635572, EPI_ISL_1635574, EPI_ISL_1635579, EPI_ISL_1635580, EPI_ISL_1635587, EPI_ISL_1635588, EPI_ISL_1635597, EPI_ISL_1635598, EPI_ISL_1635601, EPI_ISL_1635602, EPI_ISL_1635605, EPI_ISL_1635606, EPI_ISL_1635610, EPI_ISL_1635633, EPI_ISL_1635641, EPI_ISL_1635642, EPI_ISL_1635651, EPI_ISL_1635657, EPI_ISL_1635661, EPI_ISL_1635664, EPI_ISL_1635669, EPI_ISL_1635677, EPI_ISL_1635683, EPI_ISL_1635684, EPI_ISL_1635693, EPI_ISL_1635694, EPI_ISL_1635699, EPI_ISL_1635705, EPI_ISL_1635707, EPI_ISL_1635714, EPI_ISL_1635717, EPI_ISL_1635718, EPI_ISL_1635722, EPI_ISL_1635735, EPI_ISL_1635739, EPI_ISL_1635742, EPI_ISL_1635751, EPI_ISL_1635755, EPI_ISL_1635758, EPI_ISL_1635773, EPI_ISL_1635774, EPI_ISL_1635778, EPI_ISL_1635779, EPI_ISL_1635780, EPI_ISL_1635787, EPI_ISL_1635789, EPI_ISL_1635791, EPI_ISL_1635795, EPI_ISL_1635797, EPI_ISL_1635799, EPI_ISL_1635803, EPI_ISL_1635804, EPI_ISL_1635816, EPI_ISL_1635824, EPI_ISL_1635833, EPI_ISL_1635836, EPI_ISL_1635839, EPI_ISL_1635841, EPI_ISL_1635843, EPI_ISL_1635848, EPI_ISL_1635849, EPI_ISL_1635851, EPI_ISL_1635854, EPI_ISL_1635868, EPI_ISL_1635874, EPI_ISL_1635876, EPI_ISL_1635889, EPI_ISL_1635898, EPI_ISL_1635905, EPI_ISL_1635905, EPI_ISL_1635918, EPI_ISL_1635928, EPI_ISL_1635945, EPI_ISL_1635946, EPI_ISL_1635955, EPI_ISL_1635958, EPI_ISL_1635962, EPI_ISL_1635965, EPI_ISL_1635969, EPI_ISL_1635977, EPI_ISL_1635987, EPI_ISL_1635991, EPI_ISL_1635994, EPI_ISL_1636003, EPI_ISL_1636016, EPI_ISL_1636026, EPI_ISL_1636029, EPI_ISL_1636042, EPI_ISL_1636051, EPI_ISL_1636056, EPI_ISL_1636063, EPI_ISL_1636078, EPI_ISL_1636106, EPI_ISL_1636108, EPI_ISL_1636118, EPI_ISL_1636120, EPI_ISL_1636123, EPI_ISL_1636127, EPI_ISL_1636134, EPI_ISL_1636138, EPI_ISL_1636143, EPI_ISL_1636149, EPI_ISL_1636152, EPI_ISL_1636156, EPI_ISL_1636164, EPI_ISL_1636165, EPI_ISL_1636170, EPI_ISL_1636171, EPI_ISL_1636193, EPI_ISL_1636206, EPI_ISL_1636207, EPI_ISL_1636219, EPI_ISL_1636221, EPI_ISL_1636229, EPI_ISL_1636230, EPI_ISL_1636232, EPI_ISL_1636237, EPI_ISL_1636244, EPI_ISL_1636247, EPI_ISL_1636252, EPI_ISL_1636258, EPI_ISL_1636271, EPI_ISL_1636273, EPI_ISL_1636275, EPI_ISL_1636276, EPI_ISL_1636288, EPI_ISL_1636290, EPI_ISL_1636297, EPI_ISL_1636303, EPI_ISL_1636309, EPI_ISL_1636310, EPI_ISL_1636311, EPI_ISL_1636320, EPI_ISL_1636327, EPI_ISL_1636329, EPI_ISL_1636338, EPI_ISL_1636340, EPI_ISL_1636346, EPI_ISL_1636354, EPI_ISL_1636356, EPI_ISL_1636368, EPI_ISL_1636376, EPI_ISL_1636380, EPI_ISL_1636388, EPI_ISL_1636389 |                                                                                                             |                                                                                           |                                                                                                                                                                                                                                                                                                                                                                                                                                                         |
| see above                                                                                                                                                                                                                                                                                                                                                                                                                                                                                                                                                                                                                                                                                                                                                                                                                                                                                                                                                                                                                                                                                                                                                                                                                                                                                                                                                                                                                                                                                                                                                                                                                                                                                                                                                                                                                                                                                                                                                                                                                                                                                                                                                                                                                                                                                                                                                                                                                                                                                                                                                                                                                                                                                                                                                                                                                                                        | Pandemic Response Lab - NYC                                                                                 | Pandemic Response Lab, R&D                                                                | Henry Lee, Michael Hammerling, Melissa Hopkins, Cybill del Castillo, Shinyoung Clair Kang, William Ward, Pradeep Bugga, Sol Rey, Dylan Law, Katharine Nelson, Haiping Hao, Jon Laurent                                                                                                                                                                                                                                                                  |
| EPI_ISL_1636461                                                                                                                                                                                                                                                                                                                                                                                                                                                                                                                                                                                                                                                                                                                                                                                                                                                                                                                                                                                                                                                                                                                                                                                                                                                                                                                                                                                                                                                                                                                                                                                                                                                                                                                                                                                                                                                                                                                                                                                                                                                                                                                                                                                                                                                                                                                                                                                                                                                                                                                                                                                                                                                                                                                                                                                                                                                  | Microbiology Department, Laboratori Clinic Metropolitana Nord, Hospital Universitari Germans Trias i Pujol. | Can Ruti SARS-CoV-2 Sequencing Hub (HUGTPI/IRSI/CAIXA/IGTP)                               | Marc Noguera-Julian, Pilar Armengol, Ignacio Blanco, Antoni E Bordoy, Francesc Catala-Moll, Pere-Joan Cardona, Maria Casadella, Cristina Casañ, Gemma Clara, Bonaventura Clotet, Cristina Esteban, Montserrat Gimenez, Mercedes Guerrero, Anna Not, Roger Paredes, Mariona Parera, Verónica Saludes, Alba Sánchez, and Elisa Martró on behalf of the Can Ruti SARS-CoV-2 Sequencing Hub.                                                                |
| EPI_ISL_1637959                                                                                                                                                                                                                                                                                                                                                                                                                                                                                                                                                                                                                                                                                                                                                                                                                                                                                                                                                                                                                                                                                                                                                                                                                                                                                                                                                                                                                                                                                                                                                                                                                                                                                                                                                                                                                                                                                                                                                                                                                                                                                                                                                                                                                                                                                                                                                                                                                                                                                                                                                                                                                                                                                                                                                                                                                                                  | Wales Specialist Virology Centre Sequencing Lab: Pathogen Genomics Unit                                     | Public Health Wales Microbiology Cardiff Wales Specialist Virology Centre                 | Catherine Moore, Johnathan Evans, Laura Gifford, Malorie Perry, Simon Cottrell, Angela Marchbank, Alec Birchley, Alexander Adams, Amy Gaskin, Bree Gatica-Wilcox, Jason Coombes, Joel Southgate, Lauren Gilbert, Lee Graham, Nicole Pacchiari, Sara Kuzniene-Summerhayes, Sarah Taylor, Sophie Jones, Sara Rey, Matthew Bull, Joanne Watkins, Sally Corden, Tom Connor                                                                                  |
| EPI_ISL_1638578                                                                                                                                                                                                                                                                                                                                                                                                                                                                                                                                                                                                                                                                                                                                                                                                                                                                                                                                                                                                                                                                                                                                                                                                                                                                                                                                                                                                                                                                                                                                                                                                                                                                                                                                                                                                                                                                                                                                                                                                                                                                                                                                                                                                                                                                                                                                                                                                                                                                                                                                                                                                                                                                                                                                                                                                                                                  | Universitätsklinikum Bonn - Institut für Virologie                                                          | Robert Koch Institute                                                                     | unknown                                                                                                                                                                                                                                                                                                                                                                                                                                                 |
| EPI_ISL_1647028                                                                                                                                                                                                                                                                                                                                                                                                                                                                                                                                                                                                                                                                                                                                                                                                                                                                                                                                                                                                                                                                                                                                                                                                                                                                                                                                                                                                                                                                                                                                                                                                                                                                                                                                                                                                                                                                                                                                                                                                                                                                                                                                                                                                                                                                                                                                                                                                                                                                                                                                                                                                                                                                                                                                                                                                                                                  | NCSLPH                                                                                                      | NCSLPH                                                                                    | Chase K, Miller MC, Greene S, Glover W                                                                                                                                                                                                                                                                                                                                                                                                                  |
| EPI_ISL_1647857                                                                                                                                                                                                                                                                                                                                                                                                                                                                                                                                                                                                                                                                                                                                                                                                                                                                                                                                                                                                                                                                                                                                                                                                                                                                                                                                                                                                                                                                                                                                                                                                                                                                                                                                                                                                                                                                                                                                                                                                                                                                                                                                                                                                                                                                                                                                                                                                                                                                                                                                                                                                                                                                                                                                                                                                                                                  | Hospital General Universitario Gregorio Marañón                                                             | Hospital General Universitario Gregorio Marañón                                           | Sergio Buenestado Serrano, Pedro Sola Campoy, Laura Pérez-Lago, Cristina Rodríguez-Grande, Pilar Catalán, Patricia Muñoz, Darío García de Viedma                                                                                                                                                                                                                                                                                                        |
| EPI_ISL_1648094, EPI_ISL_1648105, EPI_ISL_1648106, EPI_ISL_1648109, EPI_ISL_1648110, EPI_ISL_1648111, EPI_ISL_1648118                                                                                                                                                                                                                                                                                                                                                                                                                                                                                                                                                                                                                                                                                                                                                                                                                                                                                                                                                                                                                                                                                                                                                                                                                                                                                                                                                                                                                                                                                                                                                                                                                                                                                                                                                                                                                                                                                                                                                                                                                                                                                                                                                                                                                                                                                                                                                                                                                                                                                                                                                                                                                                                                                                                                            | NJDOH, Public Health and Environmental Laboratories                                                         | NJ_PHEL                                                                                   | Lindsey Bodnar, Shiv K. Verma, Jacquelyn Deverell, Matthew Scarnati, Dana Woell, Byeong Jeong                                                                                                                                                                                                                                                                                                                                                           |
| EPI_ISL_1648161                                                                                                                                                                                                                                                                                                                                                                                                                                                                                                                                                                                                                                                                                                                                                                                                                                                                                                                                                                                                                                                                                                                                                                                                                                                                                                                                                                                                                                                                                                                                                                                                                                                                                                                                                                                                                                                                                                                                                                                                                                                                                                                                                                                                                                                                                                                                                                                                                                                                                                                                                                                                                                                                                                                                                                                                                                                  | NCSLPH                                                                                                      | NCSLPH                                                                                    | Chase K, Miller MC, Greene S, Glover W                                                                                                                                                                                                                                                                                                                                                                                                                  |
| EPI_ISL_1648187, EPI_ISL_1648213, EPI_ISL_1648260, EPI_ISL_1648341, EPI_ISL_1648359, EPI_ISL_1648367, EPI_ISL_1648372, EPI_ISL_1648384, EPI_ISL_1648387, EPI_ISL_1648430, EPI_ISL_1648538, EPI_ISL_1648691, EPI_ISL_1648728, EPI_ISL_1648763, EPI_ISL_1648772, EPI_ISL_1648784, EPI_ISL_1648829, EPI_ISL_1648837                                                                                                                                                                                                                                                                                                                                                                                                                                                                                                                                                                                                                                                                                                                                                                                                                                                                                                                                                                                                                                                                                                                                                                                                                                                                                                                                                                                                                                                                                                                                                                                                                                                                                                                                                                                                                                                                                                                                                                                                                                                                                                                                                                                                                                                                                                                                                                                                                                                                                                                                                 |                                                                                                             |                                                                                           |                                                                                                                                                                                                                                                                                                                                                                                                                                                         |
| see above                                                                                                                                                                                                                                                                                                                                                                                                                                                                                                                                                                                                                                                                                                                                                                                                                                                                                                                                                                                                                                                                                                                                                                                                                                                                                                                                                                                                                                                                                                                                                                                                                                                                                                                                                                                                                                                                                                                                                                                                                                                                                                                                                                                                                                                                                                                                                                                                                                                                                                                                                                                                                                                                                                                                                                                                                                                        | Quest Diagnostics Incorporated                                                                              | Centers for Disease Control and Prevention Division of Viral Diseases, Pathogen Discovery | Dakota Howard, Dhvani Batra, Peter W. Cook, Kara Moser, Adrian Paskey, Jason Caravass, Benjamin Rambo-Martin, Shatavia Morrison, Christopher Gulvick, Scott Sammons, Yvette Unoarumhi, Darlene Wagner, Matthew Schmerer, S. H. Rosenthal, A. Gerasimova, R. M. Kagan, B. Anderson, M. Hua, Y. Liu, L.E. Bernstein, K.E. Livingston, A. Perez, I. A. Shlyakhter, R. V. Rolando, R. Owen, P. Tanpaiboon, F. Lacbawan, Clinton R. Paden, Duncan MacCannell |
| EPI_ISL_1648977, EPI_ISL_1649066, EPI_ISL_1649103, EPI_ISL_1649104, EPI_ISL_1649155, EPI_ISL_1649159, EPI_ISL_1649228, EPI_ISL_1649235, EPI_ISL_1649240, EPI_ISL_1649248, EPI_ISL_1649252, EPI_ISL_1649305, EPI_ISL_1649326, EPI_ISL_1649358, EPI_ISL_1649399, EPI_ISL_1649429, EPI_ISL_1649430, EPI_ISL_1649438, EPI_ISL_1649503, EPI_ISL_1649504, EPI_ISL_1649539, EPI_ISL_1649568, EPI_ISL_1649615, EPI_ISL_1649663, EPI_ISL_1649675, EPI_ISL_1649692, EPI_ISL_1649725, EPI_ISL_1649777, EPI_ISL_1649820, EPI_ISL_1649834, EPI_ISL_1649846, EPI_ISL_1649861, EPI_ISL_1649896, EPI_ISL_1650003,                                                                                                                                                                                                                                                                                                                                                                                                                                                                                                                                                                                                                                                                                                                                                                                                                                                                                                                                                                                                                                                                                                                                                                                                                                                                                                                                                                                                                                                                                                                                                                                                                                                                                                                                                                                                                                                                                                                                                                                                                                                                                                                                                                                                                                                                |                                                                                                             |                                                                                           |                                                                                                                                                                                                                                                                                                                                                                                                                                                         |

|                                                                                                                                                                                                                                                                                                                                                                                                                                                                                                                                                                                                                                                                                       |           |                                                                     |                                                                                                                                                                                           |                                                                                                                                                                                                                                                                                                                                                                                                                                                                         |
|---------------------------------------------------------------------------------------------------------------------------------------------------------------------------------------------------------------------------------------------------------------------------------------------------------------------------------------------------------------------------------------------------------------------------------------------------------------------------------------------------------------------------------------------------------------------------------------------------------------------------------------------------------------------------------------|-----------|---------------------------------------------------------------------|-------------------------------------------------------------------------------------------------------------------------------------------------------------------------------------------|-------------------------------------------------------------------------------------------------------------------------------------------------------------------------------------------------------------------------------------------------------------------------------------------------------------------------------------------------------------------------------------------------------------------------------------------------------------------------|
| EPI_ISL_1650006, EPI_ISL_1650056, EPI_ISL_1650061, EPI_ISL_1650094, EPI_ISL_1650118, EPI_ISL_1650200, EPI_ISL_1650237, EPI_ISL_1650252, EPI_ISL_1650287, EPI_ISL_1650433, EPI_ISL_1650472, EPI_ISL_1650482, EPI_ISL_1650541, EPI_ISL_1650558, EPI_ISL_1650559, EPI_ISL_1650601, EPI_ISL_1650608, EPI_ISL_1650634, EPI_ISL_1650676, EPI_ISL_1650779, EPI_ISL_1650811, EPI_ISL_1650819, EPI_ISL_1650825, EPI_ISL_1650834, EPI_ISL_1650839, EPI_ISL_1650854, EPI_ISL_1650931, EPI_ISL_1650949, EPI_ISL_1650953, EPI_ISL_1650985, EPI_ISL_1650987, EPI_ISL_1650990, EPI_ISL_1651069, EPI_ISL_1651077, EPI_ISL_1651092, EPI_ISL_1651098, EPI_ISL_1651154, EPI_ISL_1651183, EPI_ISL_1651185 | see above | Aegis Sciences Corporation                                          | Centers for Disease Control and Prevention Division of Viral Diseases, Pathogen Discovery                                                                                                 | Dakota Howard, Dhvani Batra, Peter W. Cook, Kara Moser, Adrian Paskey, Jason Caravas, Benjamin Rambo-Martin, Shatavia Morrison, Christopher Gulvick, Scott Sammons, Yvette Unoarumhi, Darlene Wagner, Matthew Schmeier, Cyndi Clark, Patrick Campbell, Rob Case, Vikramsinha Ghorpade, Holly Houdeshell, Ola Kvalvaag, Dillon Nall, Ethan Sanders, Alec Vest, Shaun Westlund, Matthew Hardison, Clinton R. Paden, Duncan MacCannell                                     |
| EPI_ISL_1652490                                                                                                                                                                                                                                                                                                                                                                                                                                                                                                                                                                                                                                                                       |           | Illinois Department of Public Health                                | Gagnon Lab, Southern Illinois University                                                                                                                                                  | Keith Gagnon                                                                                                                                                                                                                                                                                                                                                                                                                                                            |
| EPI_ISL_1652527                                                                                                                                                                                                                                                                                                                                                                                                                                                                                                                                                                                                                                                                       |           | Simple Laboratories                                                 | Gagnon Lab, Southern Illinois University                                                                                                                                                  | Keith Gagnon                                                                                                                                                                                                                                                                                                                                                                                                                                                            |
| EPI_ISL_1653130                                                                                                                                                                                                                                                                                                                                                                                                                                                                                                                                                                                                                                                                       |           | Lighthouse Lab in Cambridge                                         | Wellcome Sanger Institute for the COVID-19 Genomics UK (COG-UK) Consortium                                                                                                                | Rob Howes, The Lighthouse Lab in Cambridge and Alex Alderton, Roberto Amato, Jeffrey Barrett, Sonia Goncalves, Ewan Harrison, David K. Jackson, Ian Johnston, Dominic Kwiatkowski, Cordelia Langford, John Sillitoe on behalf of the Wellcome Sanger Institute COVID-19 Surveillance Team                                                                                                                                                                               |
| EPI_ISL_1653774, EPI_ISL_1653783                                                                                                                                                                                                                                                                                                                                                                                                                                                                                                                                                                                                                                                      |           | Southern Nevada Public Health Laboratory                            | Southern Nevada Public Health Laboratory                                                                                                                                                  | Michael Picker                                                                                                                                                                                                                                                                                                                                                                                                                                                          |
| EPI_ISL_1654582, EPI_ISL_1654591, EPI_ISL_1654592, EPI_ISL_1654600, EPI_ISL_1654603, EPI_ISL_1654606, EPI_ISL_1654613, EPI_ISL_1654621, EPI_ISL_1654626, EPI_ISL_1654633, EPI_ISL_1654634, EPI_ISL_1654635, EPI_ISL_1654644, EPI_ISL_1654646                                                                                                                                                                                                                                                                                                                                                                                                                                          | see above | NYU Langone Health                                                  | Departments of Pathology and Medicine, New York University School of Medicine                                                                                                             | Adriana Heguy, Dacia Dimartino, Emily Guzman, Christian Marier, Peter Meyn, Sitharam Ramaswami, Gael Westby, Paul Zappile, Yutong Zhang, Paolo Cotzia, Guiqing Wang                                                                                                                                                                                                                                                                                                     |
| EPI_ISL_1656455                                                                                                                                                                                                                                                                                                                                                                                                                                                                                                                                                                                                                                                                       |           | University of Michigan Clinical Microbiology Laboratory             | Lauring Lab, University of Michigan, Department of Microbiology and Immunology                                                                                                            | Valesano                                                                                                                                                                                                                                                                                                                                                                                                                                                                |
| EPI_ISL_1656734                                                                                                                                                                                                                                                                                                                                                                                                                                                                                                                                                                                                                                                                       |           | Synlab Haut de France                                               | UMR 8199/1283 EGID                                                                                                                                                                        | Mehdi Derhourhi                                                                                                                                                                                                                                                                                                                                                                                                                                                         |
| EPI_ISL_1658632                                                                                                                                                                                                                                                                                                                                                                                                                                                                                                                                                                                                                                                                       |           | Viollier AG                                                         | Department of Biosystems Science and Engineering, ETH Zurich                                                                                                                              | Chaoran Chen, Sarah Nadeau, Catharine Aquino, Ivan Topolsky, Philipp Jablonski, Lara Fuhrmann, David Drefuss, Katharina Jahn, Andreia Cabral de Gouvea, Maria Domenica Moccia, Simon Gruter, Timothy Sykes, Lennart Opitz, Griffin White, Laura Neff, Doris Popovic, Andrea Patrignani, Jay Tracy, Ralph Schlapbach, Christiane Beckmann, Maurice Redondo, Olivier Kobel, Christoph Noppen, Sophie Seidel, Noemie Santamaria de Souza, Niko Beerenwinkel, Tanja Stadler |
| EPI_ISL_1659640                                                                                                                                                                                                                                                                                                                                                                                                                                                                                                                                                                                                                                                                       |           | National Institute of Public Health - National Institute of Hygiene | 1. Academic Center for Pathomorphological and Genetic-Molecular Diagnostics Ltd, Bialystok, Poland 2. National Institute of Public Health - National Institute of Hygiene, Warsaw, Poland | Radosaw Charkiewicz, Jacek Nikliski, Przemyslaw Biecek Joanna Resze, Piotr Majewski, Anetta Sulewska, Piotr Karabowicz, Joanna Kiluk, Janusz Dzio, Konrad Raczkowski, Katarzyna Zacharczuk, Magdalena Nowakowska, Magorzata Sadkowska-Todys, Tomasz Wokowicz                                                                                                                                                                                                            |
| EPI_ISL_1660383                                                                                                                                                                                                                                                                                                                                                                                                                                                                                                                                                                                                                                                                       |           | Houston Health Dept.                                                | Houston Health Dept.                                                                                                                                                                      | Ryker Penn, Pamela Brown, Adolpho Lara, Yanlai Lai                                                                                                                                                                                                                                                                                                                                                                                                                      |
| EPI_ISL_1660516                                                                                                                                                                                                                                                                                                                                                                                                                                                                                                                                                                                                                                                                       |           | Orebro University Hospital                                          | Orebro University Hospital                                                                                                                                                                | unknown                                                                                                                                                                                                                                                                                                                                                                                                                                                                 |
| EPI_ISL_1662655                                                                                                                                                                                                                                                                                                                                                                                                                                                                                                                                                                                                                                                                       |           | Delaware Public Health Lab                                          | Delaware Public Health Lab                                                                                                                                                                | Rebecca Savage                                                                                                                                                                                                                                                                                                                                                                                                                                                          |
| EPI_ISL_1662727                                                                                                                                                                                                                                                                                                                                                                                                                                                                                                                                                                                                                                                                       |           | Marshfield Labs                                                     | Pathogen Discovery, Respiratory Viruses Branch, Division of Viral Diseases, Centers for Disease Control and Prevention                                                                    | Ying Tao, Yan Li, Anna Kelleher, Jing Zhang, Anna Montmayeur, Brian Lynch, Krista Queen, Anna Uehara, Peter Cook, Han Jia Justin Ng, Rachel Marine, Clinton R. Paden, Haibin Wang, Mark Burroughs, Justin Lee, Adam Retchless, Suxiang Tong                                                                                                                                                                                                                             |
| EPI_ISL_1663075                                                                                                                                                                                                                                                                                                                                                                                                                                                                                                                                                                                                                                                                       |           | Illinois Department of Public Health                                | Illinois Department of Public Health - Chicago Lab                                                                                                                                        | Vineet K. Dhiman, Ira Heimler                                                                                                                                                                                                                                                                                                                                                                                                                                           |
| EPI_ISL_1664327, EPI_ISL_1664345, EPI_ISL_1664458, EPI_ISL_1664476                                                                                                                                                                                                                                                                                                                                                                                                                                                                                                                                                                                                                    |           | Clinical Molecular Microbiology Laboratory, UNC Hospitals           | Jeremy Wang                                                                                                                                                                               | Jeremy Wang, Alexander Rubinsteyn, Colleen Rice, Jason Smedberg, Shawn Hawken, Melissa Miller, Corbin Jones, Robert Hagan                                                                                                                                                                                                                                                                                                                                               |
| EPI_ISL_1665176                                                                                                                                                                                                                                                                                                                                                                                                                                                                                                                                                                                                                                                                       |           | CONSEJERIA DE SANIDAD Y ASUNTOS SOCIALES                            | Instituto de Salud Carlos III                                                                                                                                                             | Sandonis,V. Vázquez-Morón, S. Iglesias-Caballero, M. Camarero, S. Pozo, F. Casas, I. Jiménez, P. Zaballos, A. Monzón, S. Varona, S. Cuesta, I. GUTIERREZ AVILA, GONZALO                                                                                                                                                                                                                                                                                                 |
| EPI_ISL_1665982, EPI_ISL_1666035, EPI_ISL_1666068, EPI_ISL_1666070, EPI_ISL_1666168, EPI_ISL_1666182, EPI_ISL_1666200, EPI_ISL_1666232, EPI_ISL_1666245, EPI_ISL_1666283, EPI_ISL_1666305, EPI_ISL_1666319, EPI_ISL_1666356, EPI_ISL_1666363, EPI_ISL_1666369, EPI_ISL_1666371, EPI_ISL_1666490, EPI_ISL_1666532, EPI_ISL_1666573, EPI_ISL_1666624, EPI_ISL_1666988, EPI_ISL_1667017, EPI_ISL_1667114, EPI_ISL_1667129, EPI_ISL_1667157, EPI_ISL_1667197, EPI_ISL_1667219, EPI_ISL_1667253, EPI_ISL_1667269, EPI_ISL_1667274, EPI_ISL_1667278, EPI_ISL_1667357, EPI_ISL_1667373                                                                                                       | see above | Fulgent Genetics                                                    | Centers for Disease Control and Prevention Division of Viral Diseases, Pathogen Discovery                                                                                                 | Dakota Howard, Dhvani Batra, Peter W. Cook, Kara Moser, Adrian Paskey, Jason Caravas, Benjamin Rambo-Martin, Shatavia Morrison, Christopher Gulvick, Scott Sammons, Yvette Unoarumhi, Darlene Wagner, Harry Gao, Mickey Li, John Gao, Joseph Fierro, Benafsh Sapra, Becky Tsai, Yan Meng, Doreen Ng, James Xie, Clinton R. Paden, Duncan MacCannell                                                                                                                     |
| EPI_ISL_1667529, EPI_ISL_1667544, EPI_ISL_1667546, EPI_ISL_1667547, EPI_ISL_1667549, EPI_ISL_1667574, EPI_ISL_1667754, EPI_ISL_1667787, EPI_ISL_1667840, EPI_ISL_1667875, EPI_ISL_1668015, EPI_ISL_1668075, EPI_ISL_1668096, EPI_ISL_1668112, EPI_ISL_1668126, EPI_ISL_1668130, EPI_ISL_1668136, EPI_ISL_1668161, EPI_ISL_1668181, EPI_ISL_1668232, EPI_ISL_1668256, EPI_ISL_1668335, EPI_ISL_1668337, EPI_ISL_1668350, EPI_ISL_1668354, EPI_ISL_1668388                                                                                                                                                                                                                              | see above | Aegis Sciences Corporation                                          | Centers for Disease Control and Prevention Division of Viral Diseases, Pathogen Discovery                                                                                                 | Dakota Howard, Dhvani Batra, Peter W. Cook, Kara Moser, Adrian Paskey, Jason Caravas, Benjamin Rambo-Martin, Shatavia Morrison, Christopher Gulvick, Scott Sammons, Yvette Unoarumhi, Darlene Wagner, Matthew Schmeier, Cyndi Clark, Patrick Campbell, Rob Case, Vikramsinha Ghorpade, Holly Houdeshell, Ola Kvalvaag, Dillon Nall, Ethan Sanders, Alec Vest, Shaun Westlund, Matthew Hardison, Clinton R. Paden, Duncan MacCannell                                     |
| EPI_ISL_1668520, EPI_ISL_1668705, EPI_ISL_1668723, EPI_ISL_1668757, EPI_ISL_1668791, EPI_ISL_1669014, EPI_ISL_1669087                                                                                                                                                                                                                                                                                                                                                                                                                                                                                                                                                                 |           | Quest Diagnostics Incorporated                                      | Centers for Disease Control and Prevention Division of Viral Diseases, Pathogen Discovery                                                                                                 | Dakota Howard, Dhvani Batra, Peter W. Cook, Kara Moser, Adrian Paskey, Jason Caravas, Benjamin Rambo-Martin, Shatavia Morrison, Christopher Gulvick, Scott Sammons, Yvette Unoarumhi, Darlene Wagner, Matthew Schmeier, S. H. Rosenthal, A. Gerasimova, R. M. Kagan, B. Anderson, M. Hua, Y. Liu, L.E. Bernstein, K.E. Livingston, A. Perez, I. A. Shlyakhter, R. V. Rolando, R. Owen, P. Tanpaiboon, F. Lacbawan, Clinton R. Paden, Duncan MacCannell                  |
| EPI_ISL_1671148, EPI_ISL_1671152, EPI_ISL_1671153, EPI_ISL_1671157                                                                                                                                                                                                                                                                                                                                                                                                                                                                                                                                                                                                                    |           | NYC Pandemic Response Lab                                           | Wadsworth Center, New York State Department of Health                                                                                                                                     | Kirsten St. George, Daryl M. Lamson, Alexis Russell, Matthew Shudt, Melissa A Leisner, Jonathan Plitnick, Catharine Prussing, Navjot Singh, John Kelly, Erasmus Schneider, Erica Lasek-Nesselquist                                                                                                                                                                                                                                                                      |
| EPI_ISL_1671160                                                                                                                                                                                                                                                                                                                                                                                                                                                                                                                                                                                                                                                                       |           | Columbia University Irving Medical Center                           | Wadsworth Center, New York State Department of Health                                                                                                                                     | Kirsten St. George, Daryl M. Lamson, Alexis Russell, Matthew Shudt, Melissa A Leisner, Jonathan Plitnick, Catharine Prussing, Navjot Singh, John Kelly, Erasmus Schneider, Erica Lasek-Nesselquist                                                                                                                                                                                                                                                                      |
| EPI_ISL_1671170, EPI_ISL_1671171                                                                                                                                                                                                                                                                                                                                                                                                                                                                                                                                                                                                                                                      |           | MONTEFIORE MEDICAL CENTER LABORATORIES                              | Wadsworth Center, New York State Department of Health                                                                                                                                     | Kirsten St. George, Daryl M. Lamson, Alexis Russell, Matthew Shudt, Melissa A Leisner, Jonathan Plitnick, Catharine Prussing, Navjot Singh, John Kelly, Erasmus Schneider, Erica Lasek-Nesselquist                                                                                                                                                                                                                                                                      |
| EPI_ISL_1671172, EPI_ISL_1671173                                                                                                                                                                                                                                                                                                                                                                                                                                                                                                                                                                                                                                                      |           | NYC Pandemic Response Lab                                           | Wadsworth Center, New York State Department of Health                                                                                                                                     | Kirsten St. George, Daryl M. Lamson, Alexis Russell, Matthew Shudt, Melissa A Leisner, Jonathan Plitnick, Catharine Prussing, Navjot Singh, John Kelly, Erasmus Schneider, Erica Lasek-Nesselquist                                                                                                                                                                                                                                                                      |
| EPI_ISL_1671176                                                                                                                                                                                                                                                                                                                                                                                                                                                                                                                                                                                                                                                                       |           | Columbia University Irving Medical Center                           | Wadsworth Center, New York State Department of Health                                                                                                                                     | Kirsten St. George, Daryl M. Lamson, Alexis Russell, Matthew Shudt, Melissa A Leisner, Jonathan Plitnick, Catharine Prussing, Navjot Singh, John Kelly, Erasmus Schneider, Erica Lasek-Nesselquist                                                                                                                                                                                                                                                                      |
| EPI_ISL_1671180, EPI_ISL_1671184                                                                                                                                                                                                                                                                                                                                                                                                                                                                                                                                                                                                                                                      |           | NYC Pandemic Response Lab                                           | Wadsworth Center, New York State Department of Health                                                                                                                                     | Kirsten St. George, Daryl M. Lamson, Alexis Russell, Matthew Shudt, Melissa A Leisner, Jonathan Plitnick, Catharine Prussing, Navjot Singh, John Kelly, Erasmus Schneider, Erica Lasek-Nesselquist                                                                                                                                                                                                                                                                      |
| EPI_ISL_1671186, EPI_ISL_1671190                                                                                                                                                                                                                                                                                                                                                                                                                                                                                                                                                                                                                                                      |           | MONTEFIORE MEDICAL CENTER LABORATORIES                              | Wadsworth Center, New York State Department of Health                                                                                                                                     | Kirsten St. George, Daryl M. Lamson, Alexis Russell, Matthew Shudt, Melissa A Leisner, Jonathan Plitnick, Catharine Prussing, Navjot Singh, John Kelly, Erasmus Schneider, Erica Lasek-Nesselquist                                                                                                                                                                                                                                                                      |
| EPI_ISL_1671194                                                                                                                                                                                                                                                                                                                                                                                                                                                                                                                                                                                                                                                                       |           | New York Presbyterian Hospital                                      | Wadsworth Center, New York State Department of Health                                                                                                                                     | Kirsten St. George, Daryl M. Lamson, Alexis Russell, Matthew Shudt, Melissa A Leisner, Jonathan Plitnick, Catharine Prussing, Navjot Singh, John Kelly, Erasmus Schneider, Erica Lasek-Nesselquist                                                                                                                                                                                                                                                                      |
| EPI_ISL_1671314, EPI_ISL_1671332, EPI_ISL_1671335, EPI_ISL_1671342, EPI_ISL_1671345                                                                                                                                                                                                                                                                                                                                                                                                                                                                                                                                                                                                   |           | TEMPUS LABS INC                                                     | Wadsworth Center, New York State Department of Health                                                                                                                                     | Kirsten St. George, Daryl M. Lamson, Alexis Russell, Matthew Shudt, Melissa A Leisner, Jonathan Plitnick, Catharine Prussing, Navjot Singh, John Kelly, Erasmus Schneider, Erica Lasek-Nesselquist                                                                                                                                                                                                                                                                      |
| EPI_ISL_1671349                                                                                                                                                                                                                                                                                                                                                                                                                                                                                                                                                                                                                                                                       |           | STONY BROOK UNIVERSITY HOSPITAL                                     | Wadsworth Center, New York State Department of Health                                                                                                                                     | Kirsten St. George, Daryl M. Lamson, Alexis Russell, Matthew Shudt, Melissa A Leisner, Jonathan Plitnick, Catharine Prussing, Navjot Singh, John Kelly, Erasmus Schneider, Erica Lasek-Nesselquist                                                                                                                                                                                                                                                                      |
| EPI_ISL_1671461                                                                                                                                                                                                                                                                                                                                                                                                                                                                                                                                                                                                                                                                       |           | WESTCHESTER MEDICAL CENTER                                          | Wadsworth Center, New York State Department of Health                                                                                                                                     | Kirsten St. George, Daryl M. Lamson, Alexis Russell, Matthew Shudt, Melissa A Leisner, Jonathan Plitnick, Catharine Prussing, Navjot Singh, John Kelly,                                                                                                                                                                                                                                                                                                                 |

|                                                                                                                                                                                                                                                                                                                                                                                                                                                                                                                                                                                                                                                                                                                                                                                                                                                                                                                                                                                                                                                                                                                                                                                                                                                                                                                                                                                                                                                                                                                                                                                                                                                                                                                                                                                                                                                                                                                                                                                                                                                                      |                                                           |                                                                                           |                                                                                                                                                                                                                                                                                                                                                                                                                                                                                                                                                                                                                                                                                                                        |
|----------------------------------------------------------------------------------------------------------------------------------------------------------------------------------------------------------------------------------------------------------------------------------------------------------------------------------------------------------------------------------------------------------------------------------------------------------------------------------------------------------------------------------------------------------------------------------------------------------------------------------------------------------------------------------------------------------------------------------------------------------------------------------------------------------------------------------------------------------------------------------------------------------------------------------------------------------------------------------------------------------------------------------------------------------------------------------------------------------------------------------------------------------------------------------------------------------------------------------------------------------------------------------------------------------------------------------------------------------------------------------------------------------------------------------------------------------------------------------------------------------------------------------------------------------------------------------------------------------------------------------------------------------------------------------------------------------------------------------------------------------------------------------------------------------------------------------------------------------------------------------------------------------------------------------------------------------------------------------------------------------------------------------------------------------------------|-----------------------------------------------------------|-------------------------------------------------------------------------------------------|------------------------------------------------------------------------------------------------------------------------------------------------------------------------------------------------------------------------------------------------------------------------------------------------------------------------------------------------------------------------------------------------------------------------------------------------------------------------------------------------------------------------------------------------------------------------------------------------------------------------------------------------------------------------------------------------------------------------|
| EPI_ISL_1671477                                                                                                                                                                                                                                                                                                                                                                                                                                                                                                                                                                                                                                                                                                                                                                                                                                                                                                                                                                                                                                                                                                                                                                                                                                                                                                                                                                                                                                                                                                                                                                                                                                                                                                                                                                                                                                                                                                                                                                                                                                                      | MONTEFIORE MEDICAL CENTER LABORATORIES                    | Wadsworth Center, New York State Department of Health                                     | Kirsten St. George, Daryl M. Lamson, Alexis Russell, Matthew Shudt, Melissa A Leisner, Jonathan Plitnick, Catharine Prussing, Navjot Singh, John Kelly, Erasmus Schneider, Erica Lasek-Nesselquist                                                                                                                                                                                                                                                                                                                                                                                                                                                                                                                     |
| EPI_ISL_1671480, EPI_ISL_1671482                                                                                                                                                                                                                                                                                                                                                                                                                                                                                                                                                                                                                                                                                                                                                                                                                                                                                                                                                                                                                                                                                                                                                                                                                                                                                                                                                                                                                                                                                                                                                                                                                                                                                                                                                                                                                                                                                                                                                                                                                                     | WESTCHESTER MEDICAL CENTER                                | Wadsworth Center, New York State Department of Health                                     | Kirsten St. George, Daryl M. Lamson, Alexis Russell, Matthew Shudt, Melissa A Leisner, Jonathan Plitnick, Catharine Prussing, Navjot Singh, John Kelly, Erasmus Schneider, Erica Lasek-Nesselquist                                                                                                                                                                                                                                                                                                                                                                                                                                                                                                                     |
| EPI_ISL_1671484                                                                                                                                                                                                                                                                                                                                                                                                                                                                                                                                                                                                                                                                                                                                                                                                                                                                                                                                                                                                                                                                                                                                                                                                                                                                                                                                                                                                                                                                                                                                                                                                                                                                                                                                                                                                                                                                                                                                                                                                                                                      | ST. FRANCIS HOSPITAL LABORATORY                           | Wadsworth Center, New York State Department of Health                                     | Kirsten St. George, Daryl M. Lamson, Alexis Russell, Matthew Shudt, Melissa A Leisner, Jonathan Plitnick, Catharine Prussing, Navjot Singh, John Kelly, Erasmus Schneider, Erica Lasek-Nesselquist                                                                                                                                                                                                                                                                                                                                                                                                                                                                                                                     |
| EPI_ISL_1671488, EPI_ISL_1671490                                                                                                                                                                                                                                                                                                                                                                                                                                                                                                                                                                                                                                                                                                                                                                                                                                                                                                                                                                                                                                                                                                                                                                                                                                                                                                                                                                                                                                                                                                                                                                                                                                                                                                                                                                                                                                                                                                                                                                                                                                     | WESTCHESTER MEDICAL CENTER                                | Wadsworth Center, New York State Department of Health                                     | Kirsten St. George, Daryl M. Lamson, Alexis Russell, Matthew Shudt, Melissa A Leisner, Jonathan Plitnick, Catharine Prussing, Navjot Singh, John Kelly, Erasmus Schneider, Erica Lasek-Nesselquist                                                                                                                                                                                                                                                                                                                                                                                                                                                                                                                     |
| EPI_ISL_1671493                                                                                                                                                                                                                                                                                                                                                                                                                                                                                                                                                                                                                                                                                                                                                                                                                                                                                                                                                                                                                                                                                                                                                                                                                                                                                                                                                                                                                                                                                                                                                                                                                                                                                                                                                                                                                                                                                                                                                                                                                                                      | NORTH SHORE UNIVERSITY HOSPITAL                           | Wadsworth Center, New York State Department of Health                                     | Kirsten St. George, Daryl M. Lamson, Alexis Russell, Matthew Shudt, Melissa A Leisner, Jonathan Plitnick, Catharine Prussing, Navjot Singh, John Kelly, Erasmus Schneider, Erica Lasek-Nesselquist                                                                                                                                                                                                                                                                                                                                                                                                                                                                                                                     |
| EPI_ISL_1671495                                                                                                                                                                                                                                                                                                                                                                                                                                                                                                                                                                                                                                                                                                                                                                                                                                                                                                                                                                                                                                                                                                                                                                                                                                                                                                                                                                                                                                                                                                                                                                                                                                                                                                                                                                                                                                                                                                                                                                                                                                                      | BOSTON HEART DIAGNOSTICS CORP                             | Wadsworth Center, New York State Department of Health                                     | Kirsten St. George, Daryl M. Lamson, Alexis Russell, Matthew Shudt, Melissa A Leisner, Jonathan Plitnick, Catharine Prussing, Navjot Singh, John Kelly, Erasmus Schneider, Erica Lasek-Nesselquist                                                                                                                                                                                                                                                                                                                                                                                                                                                                                                                     |
| EPI_ISL_1671497                                                                                                                                                                                                                                                                                                                                                                                                                                                                                                                                                                                                                                                                                                                                                                                                                                                                                                                                                                                                                                                                                                                                                                                                                                                                                                                                                                                                                                                                                                                                                                                                                                                                                                                                                                                                                                                                                                                                                                                                                                                      | MONTEFIORE MEDICAL CENTER LABORATORIES                    | Wadsworth Center, New York State Department of Health                                     | Kirsten St. George, Daryl M. Lamson, Alexis Russell, Matthew Shudt, Melissa A Leisner, Jonathan Plitnick, Catharine Prussing, Navjot Singh, John Kelly, Erasmus Schneider, Erica Lasek-Nesselquist                                                                                                                                                                                                                                                                                                                                                                                                                                                                                                                     |
| EPI_ISL_1671505, EPI_ISL_1671508                                                                                                                                                                                                                                                                                                                                                                                                                                                                                                                                                                                                                                                                                                                                                                                                                                                                                                                                                                                                                                                                                                                                                                                                                                                                                                                                                                                                                                                                                                                                                                                                                                                                                                                                                                                                                                                                                                                                                                                                                                     | WESTCHESTER MEDICAL CENTER                                | Wadsworth Center, New York State Department of Health                                     | Kirsten St. George, Daryl M. Lamson, Alexis Russell, Matthew Shudt, Melissa A Leisner, Jonathan Plitnick, Catharine Prussing, Navjot Singh, John Kelly, Erasmus Schneider, Erica Lasek-Nesselquist                                                                                                                                                                                                                                                                                                                                                                                                                                                                                                                     |
| EPI_ISL_1671603                                                                                                                                                                                                                                                                                                                                                                                                                                                                                                                                                                                                                                                                                                                                                                                                                                                                                                                                                                                                                                                                                                                                                                                                                                                                                                                                                                                                                                                                                                                                                                                                                                                                                                                                                                                                                                                                                                                                                                                                                                                      | NORTHWELL HEALTH LABORATORIES                             | Wadsworth Center, New York State Department of Health                                     | Kirsten St. George, Daryl M. Lamson, Alexis Russell, Matthew Shudt, Melissa A Leisner, Jonathan Plitnick, Catharine Prussing, Navjot Singh, John Kelly, Erasmus Schneider, Erica Lasek-Nesselquist                                                                                                                                                                                                                                                                                                                                                                                                                                                                                                                     |
| EPI_ISL_1671607                                                                                                                                                                                                                                                                                                                                                                                                                                                                                                                                                                                                                                                                                                                                                                                                                                                                                                                                                                                                                                                                                                                                                                                                                                                                                                                                                                                                                                                                                                                                                                                                                                                                                                                                                                                                                                                                                                                                                                                                                                                      | WHITE PLAINS HOSPITAL CENTER LABORATORY                   | Wadsworth Center, New York State Department of Health                                     | Kirsten St. George, Daryl M. Lamson, Alexis Russell, Matthew Shudt, Melissa A Leisner, Jonathan Plitnick, Catharine Prussing, Navjot Singh, John Kelly, Erasmus Schneider, Erica Lasek-Nesselquist                                                                                                                                                                                                                                                                                                                                                                                                                                                                                                                     |
| EPI_ISL_1671646                                                                                                                                                                                                                                                                                                                                                                                                                                                                                                                                                                                                                                                                                                                                                                                                                                                                                                                                                                                                                                                                                                                                                                                                                                                                                                                                                                                                                                                                                                                                                                                                                                                                                                                                                                                                                                                                                                                                                                                                                                                      | WESTCHESTER MEDICAL CENTER                                | Wadsworth Center, New York State Department of Health                                     | Kirsten St. George, Daryl M. Lamson, Alexis Russell, Matthew Shudt, Melissa A Leisner, Jonathan Plitnick, Catharine Prussing, Navjot Singh, John Kelly, Erasmus Schneider, Erica Lasek-Nesselquist                                                                                                                                                                                                                                                                                                                                                                                                                                                                                                                     |
| EPI_ISL_1671655                                                                                                                                                                                                                                                                                                                                                                                                                                                                                                                                                                                                                                                                                                                                                                                                                                                                                                                                                                                                                                                                                                                                                                                                                                                                                                                                                                                                                                                                                                                                                                                                                                                                                                                                                                                                                                                                                                                                                                                                                                                      | WHITE PLAINS HOSPITAL CENTER LABORATORY                   | Wadsworth Center, New York State Department of Health                                     | Kirsten St. George, Daryl M. Lamson, Alexis Russell, Matthew Shudt, Melissa A Leisner, Jonathan Plitnick, Catharine Prussing, Navjot Singh, John Kelly, Erasmus Schneider, Erica Lasek-Nesselquist                                                                                                                                                                                                                                                                                                                                                                                                                                                                                                                     |
| EPI_ISL_1671659                                                                                                                                                                                                                                                                                                                                                                                                                                                                                                                                                                                                                                                                                                                                                                                                                                                                                                                                                                                                                                                                                                                                                                                                                                                                                                                                                                                                                                                                                                                                                                                                                                                                                                                                                                                                                                                                                                                                                                                                                                                      | WESTCHESTER MEDICAL CENTER                                | Wadsworth Center, New York State Department of Health                                     | Kirsten St. George, Daryl M. Lamson, Alexis Russell, Matthew Shudt, Melissa A Leisner, Jonathan Plitnick, Catharine Prussing, Navjot Singh, John Kelly, Erasmus Schneider, Erica Lasek-Nesselquist                                                                                                                                                                                                                                                                                                                                                                                                                                                                                                                     |
| EPI_ISL_1671664                                                                                                                                                                                                                                                                                                                                                                                                                                                                                                                                                                                                                                                                                                                                                                                                                                                                                                                                                                                                                                                                                                                                                                                                                                                                                                                                                                                                                                                                                                                                                                                                                                                                                                                                                                                                                                                                                                                                                                                                                                                      | MONTEFIORE MEDICAL CENTER LABORATORIES                    | Wadsworth Center, New York State Department of Health                                     | Kirsten St. George, Daryl M. Lamson, Alexis Russell, Matthew Shudt, Melissa A Leisner, Jonathan Plitnick, Catharine Prussing, Navjot Singh, John Kelly, Erasmus Schneider, Erica Lasek-Nesselquist                                                                                                                                                                                                                                                                                                                                                                                                                                                                                                                     |
| EPI_ISL_1671665                                                                                                                                                                                                                                                                                                                                                                                                                                                                                                                                                                                                                                                                                                                                                                                                                                                                                                                                                                                                                                                                                                                                                                                                                                                                                                                                                                                                                                                                                                                                                                                                                                                                                                                                                                                                                                                                                                                                                                                                                                                      | WHITE PLAINS HOSPITAL CENTER LABORATORY                   | Wadsworth Center, New York State Department of Health                                     | Kirsten St. George, Daryl M. Lamson, Alexis Russell, Matthew Shudt, Melissa A Leisner, Jonathan Plitnick, Catharine Prussing, Navjot Singh, John Kelly, Erasmus Schneider, Erica Lasek-Nesselquist                                                                                                                                                                                                                                                                                                                                                                                                                                                                                                                     |
| EPI_ISL_1671666                                                                                                                                                                                                                                                                                                                                                                                                                                                                                                                                                                                                                                                                                                                                                                                                                                                                                                                                                                                                                                                                                                                                                                                                                                                                                                                                                                                                                                                                                                                                                                                                                                                                                                                                                                                                                                                                                                                                                                                                                                                      | WESTCHESTER MEDICAL CENTER                                | Wadsworth Center, New York State Department of Health                                     | Kirsten St. George, Daryl M. Lamson, Alexis Russell, Matthew Shudt, Melissa A Leisner, Jonathan Plitnick, Catharine Prussing, Navjot Singh, John Kelly, Erasmus Schneider, Erica Lasek-Nesselquist                                                                                                                                                                                                                                                                                                                                                                                                                                                                                                                     |
| EPI_ISL_1671667                                                                                                                                                                                                                                                                                                                                                                                                                                                                                                                                                                                                                                                                                                                                                                                                                                                                                                                                                                                                                                                                                                                                                                                                                                                                                                                                                                                                                                                                                                                                                                                                                                                                                                                                                                                                                                                                                                                                                                                                                                                      | URMC LABS                                                 | Wadsworth Center, New York State Department of Health                                     | Kirsten St. George, Daryl M. Lamson, Alexis Russell, Matthew Shudt, Melissa A Leisner, Jonathan Plitnick, Catharine Prussing, Navjot Singh, John Kelly, Erasmus Schneider, Erica Lasek-Nesselquist                                                                                                                                                                                                                                                                                                                                                                                                                                                                                                                     |
| EPI_ISL_1671668, EPI_ISL_1671670, EPI_ISL_1671673, EPI_ISL_1671675                                                                                                                                                                                                                                                                                                                                                                                                                                                                                                                                                                                                                                                                                                                                                                                                                                                                                                                                                                                                                                                                                                                                                                                                                                                                                                                                                                                                                                                                                                                                                                                                                                                                                                                                                                                                                                                                                                                                                                                                   | NORTHWELL HEALTH LABORATORIES                             | Wadsworth Center, New York State Department of Health                                     | Kirsten St. George, Daryl M. Lamson, Alexis Russell, Matthew Shudt, Melissa A Leisner, Jonathan Plitnick, Catharine Prussing, Navjot Singh, John Kelly, Erasmus Schneider, Erica Lasek-Nesselquist                                                                                                                                                                                                                                                                                                                                                                                                                                                                                                                     |
| EPI_ISL_1672290                                                                                                                                                                                                                                                                                                                                                                                                                                                                                                                                                                                                                                                                                                                                                                                                                                                                                                                                                                                                                                                                                                                                                                                                                                                                                                                                                                                                                                                                                                                                                                                                                                                                                                                                                                                                                                                                                                                                                                                                                                                      | M Health Fairview                                         | Minnesota Department of Health, Public Health Laboratory                                  | Alexandra Lorentz, Jacob Garfin, Matt Plumb, and Xiong Wang                                                                                                                                                                                                                                                                                                                                                                                                                                                                                                                                                                                                                                                            |
| EPI_ISL_1674536, EPI_ISL_1674539, EPI_ISL_1674554, EPI_ISL_1674556, EPI_ISL_1674559, EPI_ISL_1674564, EPI_ISL_1674568, EPI_ISL_1674578, EPI_ISL_1674583, EPI_ISL_1674585, EPI_ISL_1674587, EPI_ISL_1674588, EPI_ISL_1674596, EPI_ISL_1674600, EPI_ISL_1674603, EPI_ISL_1674610, EPI_ISL_1674612, EPI_ISL_1674619, EPI_ISL_1674621, EPI_ISL_1674626, EPI_ISL_1674628, EPI_ISL_1674631, EPI_ISL_1674634, EPI_ISL_1674635, EPI_ISL_1674636, EPI_ISL_1674637, EPI_ISL_1674654, EPI_ISL_1674657, EPI_ISL_1674661, EPI_ISL_1674667, EPI_ISL_1674668, EPI_ISL_1674673, EPI_ISL_1674675, EPI_ISL_1674677, EPI_ISL_1674690, EPI_ISL_1674693, EPI_ISL_1674694, EPI_ISL_1674697                                                                                                                                                                                                                                                                                                                                                                                                                                                                                                                                                                                                                                                                                                                                                                                                                                                                                                                                                                                                                                                                                                                                                                                                                                                                                                                                                                                                 |                                                           |                                                                                           |                                                                                                                                                                                                                                                                                                                                                                                                                                                                                                                                                                                                                                                                                                                        |
| see above                                                                                                                                                                                                                                                                                                                                                                                                                                                                                                                                                                                                                                                                                                                                                                                                                                                                                                                                                                                                                                                                                                                                                                                                                                                                                                                                                                                                                                                                                                                                                                                                                                                                                                                                                                                                                                                                                                                                                                                                                                                            | Yale Clinical Virology Lab                                | Grubaugh Lab - Yale School of Public Health                                               | Joseph Fauver, Mallery Breban, Isabel Ott, Tara Alpert, Mary Petrone, Anderson Brito, Chantal Vogels, Annie Watkins, Chaney Kalinich, Jessica Rothman, Marie L. Landry, Nathan Grubaugh                                                                                                                                                                                                                                                                                                                                                                                                                                                                                                                                |
| EPI_ISL_1674702, EPI_ISL_1674704                                                                                                                                                                                                                                                                                                                                                                                                                                                                                                                                                                                                                                                                                                                                                                                                                                                                                                                                                                                                                                                                                                                                                                                                                                                                                                                                                                                                                                                                                                                                                                                                                                                                                                                                                                                                                                                                                                                                                                                                                                     | Murphy Medical Association                                | Grubaugh Lab - Yale School of Public Health                                               | Joseph Fauver, Mallery Breban, Isabel Ott, Tara Alpert, Mary Petrone, Anderson Brito, Chantal Vogels, Annie Watkins, Chaney Kalinich, Jessica Rothman, Caleb Neal, Eva Laszlo, Steven Murphy, Nathan Grubaugh                                                                                                                                                                                                                                                                                                                                                                                                                                                                                                          |
| EPI_ISL_1674970                                                                                                                                                                                                                                                                                                                                                                                                                                                                                                                                                                                                                                                                                                                                                                                                                                                                                                                                                                                                                                                                                                                                                                                                                                                                                                                                                                                                                                                                                                                                                                                                                                                                                                                                                                                                                                                                                                                                                                                                                                                      | Florida Bureau of Public Health Laboratories              | Florida Bureau of Public Health Laboratories                                              | Sarah Schmedes, Jason Blanton                                                                                                                                                                                                                                                                                                                                                                                                                                                                                                                                                                                                                                                                                          |
| EPI_ISL_1678061, EPI_ISL_1678062, EPI_ISL_1678063, EPI_ISL_1678066, EPI_ISL_1678067, EPI_ISL_1678069, EPI_ISL_1678070, EPI_ISL_1678071, EPI_ISL_1678072, EPI_ISL_1678075, EPI_ISL_1678076, EPI_ISL_1678078, EPI_ISL_1678080                                                                                                                                                                                                                                                                                                                                                                                                                                                                                                                                                                                                                                                                                                                                                                                                                                                                                                                                                                                                                                                                                                                                                                                                                                                                                                                                                                                                                                                                                                                                                                                                                                                                                                                                                                                                                                          |                                                           |                                                                                           |                                                                                                                                                                                                                                                                                                                                                                                                                                                                                                                                                                                                                                                                                                                        |
| see above                                                                                                                                                                                                                                                                                                                                                                                                                                                                                                                                                                                                                                                                                                                                                                                                                                                                                                                                                                                                                                                                                                                                                                                                                                                                                                                                                                                                                                                                                                                                                                                                                                                                                                                                                                                                                                                                                                                                                                                                                                                            | NYC Department of Health and Mental Hygiene               | Centers for Disease Control and Prevention Division of Viral Diseases, Pathogen Discovery | Mili Sheth, Sarah Nobles, Jasmine Padilla, Mark Burroughs, Shoshona Le, Katie Dillon, Peter Cook, Clinton R. Paden, Dhvani Batra, Krista Queen, Kristen Knipe, Dakota Howard, Yvette Unoarumhi, Darlene Wagner, Matthew Schmerer, Ben L. Rambo-Martin, Kristine Lacey, Sam Shepard, Alison Lauffer Halpin, Dave Wentworth, Vivien Dugan, Suxiang Tong, Justin Lee                                                                                                                                                                                                                                                                                                                                                      |
| EPI_ISL_1678134, EPI_ISL_1678135, EPI_ISL_1678141                                                                                                                                                                                                                                                                                                                                                                                                                                                                                                                                                                                                                                                                                                                                                                                                                                                                                                                                                                                                                                                                                                                                                                                                                                                                                                                                                                                                                                                                                                                                                                                                                                                                                                                                                                                                                                                                                                                                                                                                                    | SC Dept of Health and Env. Control-Bureau of Laboratories | Centers for Disease Control and Prevention Division of Viral Diseases, Pathogen Discovery | Mili Sheth, Sarah Nobles, Jasmine Padilla, Mark Burroughs, Shoshona Le, Katie Dillon, Peter Cook, Clinton R. Paden, Dhvani Batra, Krista Queen, Kristen Knipe, Dakota Howard, Yvette Unoarumhi, Darlene Wagner, Matthew Schmerer, Ben L. Rambo-Martin, Kristine Lacey, Sam Shepard, Alison Lauffer Halpin, Dave Wentworth, Vivien Dugan, Suxiang Tong, Justin Lee                                                                                                                                                                                                                                                                                                                                                      |
| EPI_ISL_1678161                                                                                                                                                                                                                                                                                                                                                                                                                                                                                                                                                                                                                                                                                                                                                                                                                                                                                                                                                                                                                                                                                                                                                                                                                                                                                                                                                                                                                                                                                                                                                                                                                                                                                                                                                                                                                                                                                                                                                                                                                                                      | "CDPH, Viral and Rickettsial Disease Laboratory"          | Centers for Disease Control and Prevention Division of Viral Diseases, Pathogen Discovery | Mili Sheth, Sarah Nobles, Jasmine Padilla, Mark Burroughs, Shoshona Le, Katie Dillon, Peter Cook, Clinton R. Paden, Dhvani Batra, Krista Queen, Kristen Knipe, Dakota Howard, Yvette Unoarumhi, Darlene Wagner, Matthew Schmerer, Ben L. Rambo-Martin, Kristine Lacey, Sam Shepard, Alison Lauffer Halpin, Dave Wentworth, Vivien Dugan, Suxiang Tong, Justin Lee                                                                                                                                                                                                                                                                                                                                                      |
| EPI_ISL_1678228                                                                                                                                                                                                                                                                                                                                                                                                                                                                                                                                                                                                                                                                                                                                                                                                                                                                                                                                                                                                                                                                                                                                                                                                                                                                                                                                                                                                                                                                                                                                                                                                                                                                                                                                                                                                                                                                                                                                                                                                                                                      | GA Department of Public Health Laboratory                 | Centers for Disease Control and Prevention Division of Viral Diseases, Pathogen Discovery | Mili Sheth, Sarah Nobles, Jasmine Padilla, Mark Burroughs, Shoshona Le, Katie Dillon, Peter Cook, Clinton R. Paden, Dhvani Batra, Krista Queen, Kristen Knipe, Dakota Howard, Yvette Unoarumhi, Darlene Wagner, Matthew Schmerer, Ben L. Rambo-Martin, Kristine Lacey, Sam Shepard, Alison Lauffer Halpin, Dave Wentworth, Vivien Dugan, Suxiang Tong, Justin Lee                                                                                                                                                                                                                                                                                                                                                      |
| EPI_ISL_1678894, EPI_ISL_1679008, EPI_ISL_1679014, EPI_ISL_1679020, EPI_ISL_1679021, EPI_ISL_1679023, EPI_ISL_1679052, EPI_ISL_1679621, EPI_ISL_1679741, EPI_ISL_1679760, EPI_ISL_1679776                                                                                                                                                                                                                                                                                                                                                                                                                                                                                                                                                                                                                                                                                                                                                                                                                                                                                                                                                                                                                                                                                                                                                                                                                                                                                                                                                                                                                                                                                                                                                                                                                                                                                                                                                                                                                                                                            |                                                           |                                                                                           |                                                                                                                                                                                                                                                                                                                                                                                                                                                                                                                                                                                                                                                                                                                        |
| see above                                                                                                                                                                                                                                                                                                                                                                                                                                                                                                                                                                                                                                                                                                                                                                                                                                                                                                                                                                                                                                                                                                                                                                                                                                                                                                                                                                                                                                                                                                                                                                                                                                                                                                                                                                                                                                                                                                                                                                                                                                                            | Helix/Illumina                                            | Centers for Disease Control and Prevention Division of Viral Diseases, Pathogen Discovery | Dakota Howard, Dhvani Batra, Peter W. Cook, Kara Moser, Adrian Paskey, Jason Caravas, Benjamin Rambo-Martin, Shatavia Morrison, Christopher Gulvick, Scott Sammons, Yvette Unoarumhi, Darlene Wagner, Matthew Schmerer, Eileen de Feo, Jan Antico, Christine Tran, Matthew Tolentino, Shannon Wickline, Kim Gietzen, Brad Sickler, Jingtao Liu, Eric Allen, Phil Febbo, Nicole L. Washington, Simon White, Geraint Levam, Kelly Schiabor Barrett, Elizabeth Cirulli, Alexandre Bolze, Ary Ascencio, Charlotte Rivera-Garcia, Ryan Cho, Jason Nguyen, Sherry Wang, Jimmy Ramirez, Tyler Cassens, Eren Sandoval, Magnus Isaksson, William Lee, David Becker, Marc Laurent, James Lu, Clinton R. Paden, Duncan MacCannell |
| EPI_ISL_1680545, EPI_ISL_1680550, EPI_ISL_1680552, EPI_ISL_1680603, EPI_ISL_1680647, EPI_ISL_1680687, EPI_ISL_1680692, EPI_ISL_1680698, EPI_ISL_1680701, EPI_ISL_1680765, EPI_ISL_1680776, EPI_ISL_1680778, EPI_ISL_1680780, EPI_ISL_1680785, EPI_ISL_1680790, EPI_ISL_1680792, EPI_ISL_1680850, EPI_ISL_1680858, EPI_ISL_1680865, EPI_ISL_1680867, EPI_ISL_1680868, EPI_ISL_1681143, EPI_ISL_1681173, EPI_ISL_1681188, EPI_ISL_1681201, EPI_ISL_1681203, EPI_ISL_1681204, EPI_ISL_1681249, EPI_ISL_1681257, EPI_ISL_1681259, EPI_ISL_1681266, EPI_ISL_1681269, EPI_ISL_1681274, EPI_ISL_1681276, EPI_ISL_1681280, EPI_ISL_1681298, EPI_ISL_1681318, EPI_ISL_1681322, EPI_ISL_1681333, EPI_ISL_1681335, EPI_ISL_1681336, EPI_ISL_1681341, EPI_ISL_1681342, EPI_ISL_1681344, EPI_ISL_1681415, EPI_ISL_1681416, EPI_ISL_1681419, EPI_ISL_1681421, EPI_ISL_1681431, EPI_ISL_1681432, EPI_ISL_1681433, EPI_ISL_1681455, EPI_ISL_1681473, EPI_ISL_1681495, EPI_ISL_1681504, EPI_ISL_1681547, EPI_ISL_1681560, EPI_ISL_1681565, EPI_ISL_1681577, EPI_ISL_1681602, EPI_ISL_1681746, EPI_ISL_1681777, EPI_ISL_1681846, EPI_ISL_1681848, EPI_ISL_1681849, EPI_ISL_1681865, EPI_ISL_1682025, EPI_ISL_1682037, EPI_ISL_1682061, EPI_ISL_1682098, EPI_ISL_1682107, EPI_ISL_1682109, EPI_ISL_1682121, EPI_ISL_1682161, EPI_ISL_1682293, EPI_ISL_1682342, EPI_ISL_1682420, EPI_ISL_1682558, EPI_ISL_1682763, EPI_ISL_1682823, EPI_ISL_1682929, EPI_ISL_1682996, EPI_ISL_1683049, EPI_ISL_1683096, EPI_ISL_1683100, EPI_ISL_1683102, EPI_ISL_1683108, EPI_ISL_1683113, EPI_ISL_1683131, EPI_ISL_1683168, EPI_ISL_1683200, EPI_ISL_1683201, EPI_ISL_1683214, EPI_ISL_1683220, EPI_ISL_1683272, EPI_ISL_1683273, EPI_ISL_1683282, EPI_ISL_1683283, EPI_ISL_1683299, EPI_ISL_1683308, EPI_ISL_1683333, EPI_ISL_1683344, EPI_ISL_1683345, EPI_ISL_1683382, EPI_ISL_1683383, EPI_ISL_1683409, EPI_ISL_1683425, EPI_ISL_1683459, EPI_ISL_1683485, EPI_ISL_1683493, EPI_ISL_1683552, EPI_ISL_1683597, EPI_ISL_1683635, EPI_ISL_1683648, EPI_ISL_1683655, EPI_ISL_1683664, EPI_ISL_1683668, |                                                           |                                                                                           |                                                                                                                                                                                                                                                                                                                                                                                                                                                                                                                                                                                                                                                                                                                        |

|                                                                                                                                                                                                                                                                                                                                                                                                                                                                                                                                                                                                                                                                                                                                                                                                                                                                                                                                                                                                                                                                                                                                                                                                                                                                                                                                                                                                                                                                                                                                                                                                                                                                                                                                                                                                                                                                                                                                                                                                                                                                                                                                                                                            |           |                                                 |                                                                                           |                                                                                                                                                                                                                                                                                                                                                                                                                                                                                                                                                                                                                                                                                                                                                                                                                                                                                                                                                                                                                                                  |
|--------------------------------------------------------------------------------------------------------------------------------------------------------------------------------------------------------------------------------------------------------------------------------------------------------------------------------------------------------------------------------------------------------------------------------------------------------------------------------------------------------------------------------------------------------------------------------------------------------------------------------------------------------------------------------------------------------------------------------------------------------------------------------------------------------------------------------------------------------------------------------------------------------------------------------------------------------------------------------------------------------------------------------------------------------------------------------------------------------------------------------------------------------------------------------------------------------------------------------------------------------------------------------------------------------------------------------------------------------------------------------------------------------------------------------------------------------------------------------------------------------------------------------------------------------------------------------------------------------------------------------------------------------------------------------------------------------------------------------------------------------------------------------------------------------------------------------------------------------------------------------------------------------------------------------------------------------------------------------------------------------------------------------------------------------------------------------------------------------------------------------------------------------------------------------------------|-----------|-------------------------------------------------|-------------------------------------------------------------------------------------------|--------------------------------------------------------------------------------------------------------------------------------------------------------------------------------------------------------------------------------------------------------------------------------------------------------------------------------------------------------------------------------------------------------------------------------------------------------------------------------------------------------------------------------------------------------------------------------------------------------------------------------------------------------------------------------------------------------------------------------------------------------------------------------------------------------------------------------------------------------------------------------------------------------------------------------------------------------------------------------------------------------------------------------------------------|
| EPI_ISL_1683673, EPI_ISL_1683685, EPI_ISL_1683708, EPI_ISL_1683711, EPI_ISL_1683721, EPI_ISL_1683732, EPI_ISL_1683737, EPI_ISL_1683749, EPI_ISL_1683757, EPI_ISL_1683760, EPI_ISL_1683771, EPI_ISL_1683772, EPI_ISL_1683781, EPI_ISL_1683787, EPI_ISL_1683789, EPI_ISL_1683812, EPI_ISL_1683823, EPI_ISL_1683825, EPI_ISL_1683894, EPI_ISL_1684065, EPI_ISL_1684066, EPI_ISL_1684077, EPI_ISL_1684082, EPI_ISL_1684087, EPI_ISL_1684102, EPI_ISL_1684122, EPI_ISL_1684146, EPI_ISL_1684149, EPI_ISL_1684156, EPI_ISL_1684174, EPI_ISL_1684201, EPI_ISL_1684243, EPI_ISL_1684244, EPI_ISL_1684245, EPI_ISL_1684249, EPI_ISL_1684260, EPI_ISL_1684269, EPI_ISL_1684270, EPI_ISL_1684275, EPI_ISL_1684276, EPI_ISL_1684295, EPI_ISL_1684303, EPI_ISL_1684306, EPI_ISL_1684307, EPI_ISL_1684310, EPI_ISL_1684319, EPI_ISL_1684323, EPI_ISL_1684448, EPI_ISL_1684469, EPI_ISL_1684565, EPI_ISL_1684601, EPI_ISL_1684634, EPI_ISL_1684660, EPI_ISL_1684775, EPI_ISL_1684814, EPI_ISL_1684944, EPI_ISL_1685187, EPI_ISL_1685198, EPI_ISL_1685202                                                                                                                                                                                                                                                                                                                                                                                                                                                                                                                                                                                                                                                                                                                                                                                                                                                                                                                                                                                                                                                                                                                                                  | see above | Laboratory Corporation of America               | Centers for Disease Control and Prevention Division of Viral Diseases, Pathogen Discovery | Dakota Howard, Dhvani Batra, Peter W. Cook, Kara Moser, Adrian Paskey, Jason Caravas, Benjamin Rambo-Martin, Shatavia Morrison, Christopher Gulvick, Scott Sammons, Yvette Unoarumhi, Darlene Wagner, Matthew Schmeier, Mino Agarwal, Eyad Almasri, Debbie Boles, Ayla Burns, Nuthawin Charoensri, Oren Cohen, Susan Countryman, Mary Ann Cristobal, Bobbi Croy, Suzanne Dale, Hrushikesh Deshmukh, Amanda Douglas, Vincent Drouillon, Marcia Eisenberg, Howard Engler, Rama Ghatti, Prashant Gupta, Susan Hicks, Jake Humphrey, Lax Iyer, Manoj Jain, Mohan Kolli, Brian Krueger, Tim Kuphal, Stanley Letovsky, Michael Levandoski, Craig Lukasik, Jonathan Meltzer, Brian Norvell, Mindy Nye, Scott Parker, Christos Petropoulos, John Pruitt, Steven Ragan, Scott Ryan, Mike Sapeta, Jana Schroth, Suresh Babu Selvaraju, Goran Stevovic, Amanda Suchanek, Andrea Throop, Lyndon Tilson, Thomas Urban, Joe Voshell, Kimberly Wagner, Jonathan Williams, Mary Williamson, Qian Zeng, Tricia Zwielfelhofer, Clinton R. Paden, Duncan MacCannell |
| EPI_ISL_1685473, EPI_ISL_1685519, EPI_ISL_1685562, EPI_ISL_1685574, EPI_ISL_1685578, EPI_ISL_1685596, EPI_ISL_1685608, EPI_ISL_1685623, EPI_ISL_1685690, EPI_ISL_1685699, EPI_ISL_1685749, EPI_ISL_1685806, EPI_ISL_1685807, EPI_ISL_1685813, EPI_ISL_1685820, EPI_ISL_1685821, EPI_ISL_1685824, EPI_ISL_1685841, EPI_ISL_1685890, EPI_ISL_1685916, EPI_ISL_1685917, EPI_ISL_1685928, EPI_ISL_1685954, EPI_ISL_1685960, EPI_ISL_1685992, EPI_ISL_1685999, EPI_ISL_1686135, EPI_ISL_1686138, EPI_ISL_1686173, EPI_ISL_1686233, EPI_ISL_1686282, EPI_ISL_1686307, EPI_ISL_1686393, EPI_ISL_1686397, EPI_ISL_1686559, EPI_ISL_1686588, EPI_ISL_1686747, EPI_ISL_1686771, EPI_ISL_1686774, EPI_ISL_1686776, EPI_ISL_1686779, EPI_ISL_1686785, EPI_ISL_1686792, EPI_ISL_1686804, EPI_ISL_1686805, EPI_ISL_1686897, EPI_ISL_1686973, EPI_ISL_1686991, EPI_ISL_1687031, EPI_ISL_1687050, EPI_ISL_1687091, EPI_ISL_1687139, EPI_ISL_1687140, EPI_ISL_1687149, EPI_ISL_1687195, EPI_ISL_1687205, EPI_ISL_1687224, EPI_ISL_1687280, EPI_ISL_1687310, EPI_ISL_1687385, EPI_ISL_1687391, EPI_ISL_1687430, EPI_ISL_1687443, EPI_ISL_1687491, EPI_ISL_1687510, EPI_ISL_1687553, EPI_ISL_1687600, EPI_ISL_1687650, EPI_ISL_1687653, EPI_ISL_1687699, EPI_ISL_1687730, EPI_ISL_1687748, EPI_ISL_1687786, EPI_ISL_1687833, EPI_ISL_1687835, EPI_ISL_1687871, EPI_ISL_1687874, EPI_ISL_1687904, EPI_ISL_1687961, EPI_ISL_1688002, EPI_ISL_1688049, EPI_ISL_1688077, EPI_ISL_1688095, EPI_ISL_1688155, EPI_ISL_1688245, EPI_ISL_1688392, EPI_ISL_1688557, EPI_ISL_1688620, EPI_ISL_1688634, EPI_ISL_1688638, EPI_ISL_1688670, EPI_ISL_1688700, EPI_ISL_1688738, EPI_ISL_1688766, EPI_ISL_1688957, EPI_ISL_1688968, EPI_ISL_1689219, EPI_ISL_1689298, EPI_ISL_1689385, EPI_ISL_1689315, EPI_ISL_1689626, EPI_ISL_1689629, EPI_ISL_1689634, EPI_ISL_1689636, EPI_ISL_1689729, EPI_ISL_1689735, EPI_ISL_1689750, EPI_ISL_1689823, EPI_ISL_1689854, EPI_ISL_1689855, EPI_ISL_1689856, EPI_ISL_1689865, EPI_ISL_1689866, EPI_ISL_1689887, EPI_ISL_1689890, EPI_ISL_1689998, EPI_ISL_1690043, EPI_ISL_1690046, EPI_ISL_1690059, EPI_ISL_1690115, EPI_ISL_1690121, EPI_ISL_1690180, EPI_ISL_1690189, EPI_ISL_1690250 | see above | Aegis Sciences Corporation                      | Centers for Disease Control and Prevention Division of Viral Diseases, Pathogen Discovery | Dakota Howard, Dhvani Batra, Peter W. Cook, Kara Moser, Adrian Paskey, Jason Caravas, Benjamin Rambo-Martin, Shatavia Morrison, Christopher Gulvick, Scott Sammons, Yvette Unoarumhi, Darlene Wagner, Matthew Schmeier, Cyndi Clark, Patrick Campbell, Rob Case, Vikramsinha Ghorpade, Holly Houdeshell, Ola Kvalvaag, Dillon Nall, Ethan Sanders, Alec Vest, Shaun Westlund, Matthew Hardison, Clinton R. Paden, Duncan MacCannell                                                                                                                                                                                                                                                                                                                                                                                                                                                                                                                                                                                                              |
| EPI_ISL_1690401, EPI_ISL_1690455, EPI_ISL_1690499, EPI_ISL_1690719, EPI_ISL_1690890, EPI_ISL_1690956, EPI_ISL_1690970, EPI_ISL_1691015, EPI_ISL_1691212, EPI_ISL_1691228, EPI_ISL_1691323, EPI_ISL_1691338                                                                                                                                                                                                                                                                                                                                                                                                                                                                                                                                                                                                                                                                                                                                                                                                                                                                                                                                                                                                                                                                                                                                                                                                                                                                                                                                                                                                                                                                                                                                                                                                                                                                                                                                                                                                                                                                                                                                                                                 | see above | Helix/Illumina                                  | Centers for Disease Control and Prevention Division of Viral Diseases, Pathogen Discovery | Dakota Howard, Dhvani Batra, Peter W. Cook, Kara Moser, Adrian Paskey, Jason Caravas, Benjamin Rambo-Martin, Shatavia Morrison, Christopher Gulvick, Scott Sammons, Yvette Unoarumhi, Darlene Wagner, Matthew Schmeier, Eileen de Feo, Jan Antico, Christine Tran, Matthew Tolentino, Shannon Wickline, Kim Gietzen, Brad Sickler, Jingtao Liu, Eric Allen, Phil Febbo, Nicole L. Washington, Simon White, Geraint Levan, Kelly Schiabor Barrett, Elizabeth Cirulli, Alexandre Bolze, Ary Ascencio, Charlotte Rivera-Garcia, Ryan Cho, Jason Nguyen, Sherry Wang, Jimmy Ramirez, Tyler Cassens, Efrén Sandoval, Magnus Isaksson, William Lee, David Becker, Marc Laurent, James Lu, Clinton R. Paden, Duncan MacCannell                                                                                                                                                                                                                                                                                                                          |
| EPI_ISL_1691424, EPI_ISL_1691436, EPI_ISL_1691450                                                                                                                                                                                                                                                                                                                                                                                                                                                                                                                                                                                                                                                                                                                                                                                                                                                                                                                                                                                                                                                                                                                                                                                                                                                                                                                                                                                                                                                                                                                                                                                                                                                                                                                                                                                                                                                                                                                                                                                                                                                                                                                                          | see above | Quest Diagnostics Incorporated                  | Centers for Disease Control and Prevention Division of Viral Diseases, Pathogen Discovery | Dakota Howard, Dhvani Batra, Peter W. Cook, Kara Moser, Adrian Paskey, Jason Caravas, Benjamin Rambo-Martin, Shatavia Morrison, Christopher Gulvick, Scott Sammons, Yvette Unoarumhi, Darlene Wagner, Matthew Schmeier, S. H. Rosenthal, A. Gerasimova, R. M. Kagan, B. Anderson, M. Hua, Y. Liu, L.E. Bernstein, K.E. Livingston, A. Perez, I. A. Shlyakhter, R. V. Rolando, R. Owen, P. Tanpaiboon, F. Lacbawan, Clinton R. Paden, Duncan MacCannell                                                                                                                                                                                                                                                                                                                                                                                                                                                                                                                                                                                           |
| EPI_ISL_1692049, EPI_ISL_1692052, EPI_ISL_1692062, EPI_ISL_1692067, EPI_ISL_1692082, EPI_ISL_1692088, EPI_ISL_1692090, EPI_ISL_1692103, EPI_ISL_1692104, EPI_ISL_1692126, EPI_ISL_1692137, EPI_ISL_1692146, EPI_ISL_1692151, EPI_ISL_1692159, EPI_ISL_1692165, EPI_ISL_1692183, EPI_ISL_1692188, EPI_ISL_1692205, EPI_ISL_1692215, EPI_ISL_1692222, EPI_ISL_1692237, EPI_ISL_1692243, EPI_ISL_1692265, EPI_ISL_1692283, EPI_ISL_1692299, EPI_ISL_1692300, EPI_ISL_1692308, EPI_ISL_1692309, EPI_ISL_1692349, EPI_ISL_1692366, EPI_ISL_1692371, EPI_ISL_1692377, EPI_ISL_1692379, EPI_ISL_1692380, EPI_ISL_1692390, EPI_ISL_1692397, EPI_ISL_1692402, EPI_ISL_1692403, EPI_ISL_1692428, EPI_ISL_1692429, EPI_ISL_1692444, EPI_ISL_1692485, EPI_ISL_1692503, EPI_ISL_1692575, EPI_ISL_1692581, EPI_ISL_1692669, EPI_ISL_1692889, EPI_ISL_1693025, EPI_ISL_1693108, EPI_ISL_1693115, EPI_ISL_1693125, EPI_ISL_1693167, EPI_ISL_1693175, EPI_ISL_1693229, EPI_ISL_1693274, EPI_ISL_1693275, EPI_ISL_1693307, EPI_ISL_1693320, EPI_ISL_1693375, EPI_ISL_1693670, EPI_ISL_1693927, EPI_ISL_1693966, EPI_ISL_1693968, EPI_ISL_1694015, EPI_ISL_1694347, EPI_ISL_1694388, EPI_ISL_1694412, EPI_ISL_1694520                                                                                                                                                                                                                                                                                                                                                                                                                                                                                                                                                                                                                                                                                                                                                                                                                                                                                                                                                                                         | see above | Infinity Biologix                               | Centers for Disease Control and Prevention Division of Viral Diseases, Pathogen Discovery | Dakota Howard, Dhvani Batra, Peter W. Cook, Kara Moser, Adrian Paskey, Jason Caravas, Benjamin Rambo-Martin, Shatavia Morrison, Christopher Gulvick, Scott Sammons, Yvette Unoarumhi, Darlene Wagner, Matthew Schmeier, Christian Bixby, Yiheng Wang, Jonathan Schultz, Chirayya Goswami, Russ Hager, Robin Grimwood, Clinton R. Paden, Duncan MacCannell                                                                                                                                                                                                                                                                                                                                                                                                                                                                                                                                                                                                                                                                                        |
| EPI_ISL_1694671                                                                                                                                                                                                                                                                                                                                                                                                                                                                                                                                                                                                                                                                                                                                                                                                                                                                                                                                                                                                                                                                                                                                                                                                                                                                                                                                                                                                                                                                                                                                                                                                                                                                                                                                                                                                                                                                                                                                                                                                                                                                                                                                                                            | see above | Quest Diagnostics Incorporated                  | Centers for Disease Control and Prevention Division of Viral Diseases, Pathogen Discovery | Dakota Howard, Dhvani Batra, Peter W. Cook, Kara Moser, Adrian Paskey, Jason Caravas, Benjamin Rambo-Martin, Shatavia Morrison, Christopher Gulvick, Scott Sammons, Yvette Unoarumhi, Darlene Wagner, Matthew Schmeier, S. H. Rosenthal, A. Gerasimova, R. M. Kagan, B. Anderson, M. Hua, Y. Liu, L.E. Bernstein, K.E. Livingston, A. Perez, I. A. Shlyakhter, R. V. Rolando, R. Owen, P. Tanpaiboon, F. Lacbawan, Clinton R. Paden, Duncan MacCannell                                                                                                                                                                                                                                                                                                                                                                                                                                                                                                                                                                                           |
| EPI_ISL_1694699                                                                                                                                                                                                                                                                                                                                                                                                                                                                                                                                                                                                                                                                                                                                                                                                                                                                                                                                                                                                                                                                                                                                                                                                                                                                                                                                                                                                                                                                                                                                                                                                                                                                                                                                                                                                                                                                                                                                                                                                                                                                                                                                                                            | see above | DOHMH Jamaica                                   | New York City Public Health Laboratory                                                    | Jade Wang, et al.                                                                                                                                                                                                                                                                                                                                                                                                                                                                                                                                                                                                                                                                                                                                                                                                                                                                                                                                                                                                                                |
| EPI_ISL_1694701                                                                                                                                                                                                                                                                                                                                                                                                                                                                                                                                                                                                                                                                                                                                                                                                                                                                                                                                                                                                                                                                                                                                                                                                                                                                                                                                                                                                                                                                                                                                                                                                                                                                                                                                                                                                                                                                                                                                                                                                                                                                                                                                                                            | see above | DOHMH Riverside                                 | New York City Public Health Laboratory                                                    | Jade Wang, et al.                                                                                                                                                                                                                                                                                                                                                                                                                                                                                                                                                                                                                                                                                                                                                                                                                                                                                                                                                                                                                                |
| EPI_ISL_1694712                                                                                                                                                                                                                                                                                                                                                                                                                                                                                                                                                                                                                                                                                                                                                                                                                                                                                                                                                                                                                                                                                                                                                                                                                                                                                                                                                                                                                                                                                                                                                                                                                                                                                                                                                                                                                                                                                                                                                                                                                                                                                                                                                                            | see above | DOHMH Jamaica                                   | New York City Public Health Laboratory                                                    | Jade Wang, et al.                                                                                                                                                                                                                                                                                                                                                                                                                                                                                                                                                                                                                                                                                                                                                                                                                                                                                                                                                                                                                                |
| EPI_ISL_1694713                                                                                                                                                                                                                                                                                                                                                                                                                                                                                                                                                                                                                                                                                                                                                                                                                                                                                                                                                                                                                                                                                                                                                                                                                                                                                                                                                                                                                                                                                                                                                                                                                                                                                                                                                                                                                                                                                                                                                                                                                                                                                                                                                                            | see above | DOHMH Corona                                    | New York City Public Health Laboratory                                                    | Jade Wang, et al.                                                                                                                                                                                                                                                                                                                                                                                                                                                                                                                                                                                                                                                                                                                                                                                                                                                                                                                                                                                                                                |
| EPI_ISL_1694719                                                                                                                                                                                                                                                                                                                                                                                                                                                                                                                                                                                                                                                                                                                                                                                                                                                                                                                                                                                                                                                                                                                                                                                                                                                                                                                                                                                                                                                                                                                                                                                                                                                                                                                                                                                                                                                                                                                                                                                                                                                                                                                                                                            | see above | DOHMH Fort Greene                               | New York City Public Health Laboratory                                                    | Jade Wang, et al.                                                                                                                                                                                                                                                                                                                                                                                                                                                                                                                                                                                                                                                                                                                                                                                                                                                                                                                                                                                                                                |
| EPI_ISL_1694722, EPI_ISL_1694726                                                                                                                                                                                                                                                                                                                                                                                                                                                                                                                                                                                                                                                                                                                                                                                                                                                                                                                                                                                                                                                                                                                                                                                                                                                                                                                                                                                                                                                                                                                                                                                                                                                                                                                                                                                                                                                                                                                                                                                                                                                                                                                                                           | see above | OCME Office Of Chief Medical Examiner           | New York City Public Health Laboratory                                                    | Jade Wang, et al.                                                                                                                                                                                                                                                                                                                                                                                                                                                                                                                                                                                                                                                                                                                                                                                                                                                                                                                                                                                                                                |
| EPI_ISL_1694728                                                                                                                                                                                                                                                                                                                                                                                                                                                                                                                                                                                                                                                                                                                                                                                                                                                                                                                                                                                                                                                                                                                                                                                                                                                                                                                                                                                                                                                                                                                                                                                                                                                                                                                                                                                                                                                                                                                                                                                                                                                                                                                                                                            | see above | DOHMH Crown Heights                             | New York City Public Health Laboratory                                                    | Jade Wang, et al.                                                                                                                                                                                                                                                                                                                                                                                                                                                                                                                                                                                                                                                                                                                                                                                                                                                                                                                                                                                                                                |
| EPI_ISL_1694729                                                                                                                                                                                                                                                                                                                                                                                                                                                                                                                                                                                                                                                                                                                                                                                                                                                                                                                                                                                                                                                                                                                                                                                                                                                                                                                                                                                                                                                                                                                                                                                                                                                                                                                                                                                                                                                                                                                                                                                                                                                                                                                                                                            | see above | DOHMH Morrisania                                | New York City Public Health Laboratory                                                    | Jade Wang, et al.                                                                                                                                                                                                                                                                                                                                                                                                                                                                                                                                                                                                                                                                                                                                                                                                                                                                                                                                                                                                                                |
| EPI_ISL_1694735                                                                                                                                                                                                                                                                                                                                                                                                                                                                                                                                                                                                                                                                                                                                                                                                                                                                                                                                                                                                                                                                                                                                                                                                                                                                                                                                                                                                                                                                                                                                                                                                                                                                                                                                                                                                                                                                                                                                                                                                                                                                                                                                                                            | see above | DOHMH Corona                                    | New York City Public Health Laboratory                                                    | Jade Wang, et al.                                                                                                                                                                                                                                                                                                                                                                                                                                                                                                                                                                                                                                                                                                                                                                                                                                                                                                                                                                                                                                |
| EPI_ISL_1694740, EPI_ISL_1694754, EPI_ISL_1694755, EPI_ISL_1694756                                                                                                                                                                                                                                                                                                                                                                                                                                                                                                                                                                                                                                                                                                                                                                                                                                                                                                                                                                                                                                                                                                                                                                                                                                                                                                                                                                                                                                                                                                                                                                                                                                                                                                                                                                                                                                                                                                                                                                                                                                                                                                                         | see above | DOHMH Jamaica                                   | New York City Public Health Laboratory                                                    | Jade Wang, et al.                                                                                                                                                                                                                                                                                                                                                                                                                                                                                                                                                                                                                                                                                                                                                                                                                                                                                                                                                                                                                                |
| EPI_ISL_1694762                                                                                                                                                                                                                                                                                                                                                                                                                                                                                                                                                                                                                                                                                                                                                                                                                                                                                                                                                                                                                                                                                                                                                                                                                                                                                                                                                                                                                                                                                                                                                                                                                                                                                                                                                                                                                                                                                                                                                                                                                                                                                                                                                                            | see above | Department of Homeless Services                 | New York City Public Health Laboratory                                                    | Jade Wang, et al.                                                                                                                                                                                                                                                                                                                                                                                                                                                                                                                                                                                                                                                                                                                                                                                                                                                                                                                                                                                                                                |
| EPI_ISL_1695015                                                                                                                                                                                                                                                                                                                                                                                                                                                                                                                                                                                                                                                                                                                                                                                                                                                                                                                                                                                                                                                                                                                                                                                                                                                                                                                                                                                                                                                                                                                                                                                                                                                                                                                                                                                                                                                                                                                                                                                                                                                                                                                                                                            | see above | Laboratory Corporation of America               | Centers for Disease Control and Prevention Division of Viral Diseases, Pathogen Discovery | Dakota Howard, Dhvani Batra, Peter W. Cook, Kara Moser, Adrian Paskey, Jason Caravas, Benjamin Rambo-Martin, Shatavia Morrison, Christopher Gulvick, Scott Sammons, Yvette Unoarumhi, Darlene Wagner, Matthew Schmeier, Mino Agarwal, Eyad Almasri, Debbie Boles, Ayla Burns, Nuthawin Charoensri, Oren Cohen, Susan Countryman, Mary Ann Cristobal, Bobbi Croy, Suzanne Dale, Hrushikesh Deshmukh, Amanda Douglas, Vincent Drouillon, Marcia Eisenberg, Howard Engler, Rama Ghatti, Prashant Gupta, Susan Hicks, Jake Humphrey, Lax Iyer, Manoj Jain, Mohan Kolli, Brian Krueger, Tim Kuphal, Stanley Letovsky, Michael Levandoski, Craig Lukasik, Jonathan Meltzer, Brian Norvell, Mindy Nye, Scott Parker, Christos Petropoulos, John Pruitt, Steven Ragan, Scott Ryan, Mike Sapeta, Jana Schroth, Suresh Babu Selvaraju, Goran Stevovic, Amanda Suchanek, Andrea Throop, Lyndon Tilson, Thomas Urban, Joe Voshell, Kimberly Wagner, Jonathan Williams, Mary Williamson, Qian Zeng, Tricia Zwielfelhofer, Clinton R. Paden, Duncan MacCannell |
| EPI_ISL_1695113, EPI_ISL_1695237, EPI_ISL_1695305, EPI_ISL_1695382, EPI_ISL_1695392, EPI_ISL_1695469, EPI_ISL_1695539, EPI_ISL_1695554                                                                                                                                                                                                                                                                                                                                                                                                                                                                                                                                                                                                                                                                                                                                                                                                                                                                                                                                                                                                                                                                                                                                                                                                                                                                                                                                                                                                                                                                                                                                                                                                                                                                                                                                                                                                                                                                                                                                                                                                                                                     | see above | Aegis Sciences Corporation                      | Centers for Disease Control and Prevention Division of Viral Diseases, Pathogen Discovery | Dakota Howard, Dhvani Batra, Peter W. Cook, Kara Moser, Adrian Paskey, Jason Caravas, Benjamin Rambo-Martin, Shatavia Morrison, Christopher Gulvick, Scott Sammons, Yvette Unoarumhi, Darlene Wagner, Matthew Schmeier, Cyndi Clark, Patrick Campbell, Rob Case, Vikramsinha Ghorpade, Holly Houdeshell, Ola Kvalvaag, Dillon Nall, Ethan Sanders, Alec Vest, Shaun Westlund, Matthew Hardison, Clinton R. Paden, Duncan MacCannell                                                                                                                                                                                                                                                                                                                                                                                                                                                                                                                                                                                                              |
| EPI_ISL_1695787                                                                                                                                                                                                                                                                                                                                                                                                                                                                                                                                                                                                                                                                                                                                                                                                                                                                                                                                                                                                                                                                                                                                                                                                                                                                                                                                                                                                                                                                                                                                                                                                                                                                                                                                                                                                                                                                                                                                                                                                                                                                                                                                                                            | see above | NJ Public Health and Environmental Laboratories | Centers for Disease Control and Prevention Division of Viral Diseases, Pathogen Discovery | Mili Sheth, Sarah Nobles, Jasmine Padilla, Mark Burroughs, Shoshona Le, Katie Dillon, Peter Cook, Clinton R. Paden, Dhvani Batra, Krista Queen, Kristen Knipe, Dakota Howard, Yvette Unoarumhi, Darlene Wagner, Matthew Schmeier, Ben L. Rambo-Martin, Kristine Lacek, Sam Shepard, Alison Laufer Halpin, Dave Wentworth, Vivien Dugan, Suxiang Tong, Justin Lee                                                                                                                                                                                                                                                                                                                                                                                                                                                                                                                                                                                                                                                                                 |
| EPI_ISL_1695825                                                                                                                                                                                                                                                                                                                                                                                                                                                                                                                                                                                                                                                                                                                                                                                                                                                                                                                                                                                                                                                                                                                                                                                                                                                                                                                                                                                                                                                                                                                                                                                                                                                                                                                                                                                                                                                                                                                                                                                                                                                                                                                                                                            | see above | UT-Unified State Labs: Public Health Utah DOH   | Centers for Disease Control and Prevention Division of Viral Diseases, Pathogen Discovery | Mili Sheth, Sarah Nobles, Jasmine Padilla, Mark Burroughs, Shoshona Le, Katie Dillon, Peter Cook, Clinton R. Paden, Dhvani Batra, Krista Queen, Kristen Knipe, Dakota Howard, Yvette Unoarumhi, Darlene Wagner, Matthew Schmeier, Ben L. Rambo-Martin, Kristine Lacek, Sam Shepard, Alison Laufer Halpin, Dave Wentworth, Vivien Dugan, Suxiang Tong, Justin Lee                                                                                                                                                                                                                                                                                                                                                                                                                                                                                                                                                                                                                                                                                 |
| EPI_ISL_1695889, EPI_ISL_1695891                                                                                                                                                                                                                                                                                                                                                                                                                                                                                                                                                                                                                                                                                                                                                                                                                                                                                                                                                                                                                                                                                                                                                                                                                                                                                                                                                                                                                                                                                                                                                                                                                                                                                                                                                                                                                                                                                                                                                                                                                                                                                                                                                           | see above | NYSDOH Wadsworth Center, Virology Lab           | Centers for Disease Control and Prevention Division of Viral Diseases, Pathogen Discovery | Mili Sheth, Sarah Nobles, Jasmine Padilla, Mark Burroughs, Shoshona Le, Katie Dillon, Peter Cook, Clinton R. Paden, Dhvani Batra, Krista Queen, Kristen Knipe, Dakota Howard, Yvette Unoarumhi, Darlene Wagner, Matthew Schmeier, Ben L. Rambo-Martin, Kristine Lacek, Sam Shepard, Alison Laufer Halpin, Dave Wentworth, Vivien Dugan, Suxiang Tong, Justin Lee                                                                                                                                                                                                                                                                                                                                                                                                                                                                                                                                                                                                                                                                                 |

|                                                                                                                                                                                                                                              |                                                                                                                    |                                                                                                                        |                                                                                                                                                                                                                                                                                                                                                                                                                                                                                                                                                                                                                                                                                                                                                                                                   |
|----------------------------------------------------------------------------------------------------------------------------------------------------------------------------------------------------------------------------------------------|--------------------------------------------------------------------------------------------------------------------|------------------------------------------------------------------------------------------------------------------------|---------------------------------------------------------------------------------------------------------------------------------------------------------------------------------------------------------------------------------------------------------------------------------------------------------------------------------------------------------------------------------------------------------------------------------------------------------------------------------------------------------------------------------------------------------------------------------------------------------------------------------------------------------------------------------------------------------------------------------------------------------------------------------------------------|
| EPI_ISL_1695908, EPI_ISL_1695910                                                                                                                                                                                                             | NJ Public Health and Environmental Laboratories                                                                    | Centers for Disease Control and Prevention Division of Viral Diseases, Pathogen Discovery                              | Mili Sheth, Sarah Nobles, Jasmine Padilla, Mark Burroughs, Shoshona Le, Katie Dillon, Peter Cook, Clinton R. Paden, Dhvani Batra, Krista Queen, Kristen Knipe, Dakota Howard, Yvette Unoarumhi, Darlene Wagner, Matthew Schmeier, Ben L. Rambo-Martin, Kristine Lacey, Sam Shepard, Alison Laufer Halpin, Dave Wentworth, Vivien Dugan, Suxiang Tong, Justin Lee                                                                                                                                                                                                                                                                                                                                                                                                                                  |
| EPI_ISL_1697384                                                                                                                                                                                                                              | Wichita State University - Molecular Diagnostics Lab                                                               | Kansas Health and Environmental Lab                                                                                    | Mike Grose, Jonathan Barnell, Ben Olsen, and Phil Adam                                                                                                                                                                                                                                                                                                                                                                                                                                                                                                                                                                                                                                                                                                                                            |
| EPI_ISL_1697994, EPI_ISL_1698159                                                                                                                                                                                                             | Lighthouse Lab in Milton Keynes                                                                                    | Wellcome Sanger Institute for the COVID-19 Genomics UK (COG-UK) Consortium                                             | The Lighthouse Lab in Milton Keynes and Alex Alderton, Roberto Amato, Jeffrey Barrett, Sonia Goncalves, Ewan Harrison, David K. Jackson, Ian Johnston, Dominic Kwiatkowski, Cordelia Langford, John Sillitoe on behalf of the Wellcome Sanger Institute COVID-19 Surveillance Team                                                                                                                                                                                                                                                                                                                                                                                                                                                                                                                |
| EPI_ISL_1698285, EPI_ISL_1698346                                                                                                                                                                                                             | Lighthouse Lab in Cambridge                                                                                        | Wellcome Sanger Institute for the COVID-19 Genomics UK (COG-UK) Consortium                                             | Rob Howes, The Lighthouse Lab in Cambridge and Alex Alderton, Roberto Amato, Jeffrey Barrett, Sonia Goncalves, Ewan Harrison, David K. Jackson, Ian Johnston, Dominic Kwiatkowski, Cordelia Langford, John Sillitoe on behalf of the Wellcome Sanger Institute COVID-19 Surveillance Team                                                                                                                                                                                                                                                                                                                                                                                                                                                                                                         |
| EPI_ISL_1700669, EPI_ISL_1700673                                                                                                                                                                                                             | NYC Department of Health and Mental Hygiene                                                                        | Pathogen Discovery, Respiratory Viruses Branch, Division of Viral Diseases, Centers for Disease Control and Prevention | Ying Tao, Yan Li, Anna Kelleher, Jing Zhang, Anna Montmayeur, Brian Lynch, Krista Queen, Anna Uehara, Peter Cook, Han Jia Justin Ng, Rachel Marine, Clinton R. Paden, Haibin Wang, Mark Burroughs, Justin Lee, Adam Hershless, Suxiang Tong                                                                                                                                                                                                                                                                                                                                                                                                                                                                                                                                                       |
| EPI_ISL_1700702, EPI_ISL_1700706, EPI_ISL_1700707, EPI_ISL_1700709                                                                                                                                                                           | NJDOH, Public Health and Environmental Laboratories                                                                | NJ_PHEL                                                                                                                | Lindsey Bodnar, Shiv K. Verma, Jacquelyn Deverell, Matthew Scarnati, Dana Woell, Byeong Jeong                                                                                                                                                                                                                                                                                                                                                                                                                                                                                                                                                                                                                                                                                                     |
| EPI_ISL_1700788                                                                                                                                                                                                                              | NJDOH, Public Health and Environmental Laboratories                                                                | NJ Public Health and Environmental Laboratories                                                                        | Lindsey Bodnar, Shiv K. Verma, Jacquelyn Deverell, Matthew Scarnati, Dana Woell, Byeong Jeong                                                                                                                                                                                                                                                                                                                                                                                                                                                                                                                                                                                                                                                                                                     |
| EPI_ISL_1701854, EPI_ISL_1701863                                                                                                                                                                                                             | Helix/Illumina                                                                                                     | Centers for Disease Control and Prevention Division of Viral Diseases, Pathogen Discovery                              | Dakota Howard, Dhvani Batra, Peter W. Cook, Kara Moser, Adrian Paskey, Jason Caravas, Benjamin Rambo-Martin, Shatavia Morrison, Christopher Gulvick, Scott Sammons, Yvette Unoarumhi, Darlene Wagner, Matthew Schmeier, Eileen de Feo, Jan Antico, Christine Tran, Matthew Tolentino, Shannon Wickline, Kim Gietzen, Brad Sickler, Jingtao Liu, Eric Allen, Phil Febbo, Nicole L. Washington, Simon White, Geraint Levan, Kelly Schiabor Barrett, Elizabeth Cirulli, Alexandre Bolze, Ary Ascencio, Charlotte Rivera-Garcia, Ryan Cho, Jason Nguyen, Sherry Wang, Jimmy Ramirez, Tyler Cassens, Efrén Sandoval, Magnus Isaksson, William Lee, David Becker, Marc Laurent, James Lu, Clinton R. Paden, Duncan MacCannell                                                                           |
| EPI_ISL_1701884, EPI_ISL_1701900, EPI_ISL_1701915, EPI_ISL_1701949, EPI_ISL_1701952, EPI_ISL_1701972, EPI_ISL_1701976, EPI_ISL_1701978, EPI_ISL_1701996, EPI_ISL_1701997, EPI_ISL_1702037, EPI_ISL_1702055, EPI_ISL_1702076                  | see above                                                                                                          | Aegis Sciences Corporation                                                                                             | Centers for Disease Control and Prevention Division of Viral Diseases, Pathogen Discovery                                                                                                                                                                                                                                                                                                                                                                                                                                                                                                                                                                                                                                                                                                         |
| EPI_ISL_1702189, EPI_ISL_1702190, EPI_ISL_1702192, EPI_ISL_1702194, EPI_ISL_1702267, EPI_ISL_1702272, EPI_ISL_1702275, EPI_ISL_1702278, EPI_ISL_1702534, EPI_ISL_1702542                                                                     | see above                                                                                                          | Infinity Biologix                                                                                                      | Centers for Disease Control and Prevention Division of Viral Diseases, Pathogen Discovery                                                                                                                                                                                                                                                                                                                                                                                                                                                                                                                                                                                                                                                                                                         |
| EPI_ISL_1702580, EPI_ISL_1702602, EPI_ISL_1702611, EPI_ISL_1702612, EPI_ISL_1702614, EPI_ISL_1702615, EPI_ISL_1702636, EPI_ISL_1702652, EPI_ISL_1702663, EPI_ISL_1702664, EPI_ISL_1702675, EPI_ISL_1702681, EPI_ISL_1702706, EPI_ISL_1702712 | see above                                                                                                          | Quest Diagnostics Incorporated                                                                                         | Centers for Disease Control and Prevention Division of Viral Diseases, Pathogen Discovery                                                                                                                                                                                                                                                                                                                                                                                                                                                                                                                                                                                                                                                                                                         |
| EPI_ISL_1702788, EPI_ISL_1702799, EPI_ISL_1702800, EPI_ISL_1702802, EPI_ISL_1702847, EPI_ISL_1702855, EPI_ISL_1702867, EPI_ISL_1702876, EPI_ISL_1702912                                                                                      | see above                                                                                                          | Aegis Sciences Corporation                                                                                             | Centers for Disease Control and Prevention Division of Viral Diseases, Pathogen Discovery                                                                                                                                                                                                                                                                                                                                                                                                                                                                                                                                                                                                                                                                                                         |
| EPI_ISL_1703434                                                                                                                                                                                                                              | Dutch COVID-19 response team                                                                                       | National Institute for Public Health and the Environment (RIVM)                                                        | Dakota Howard, Dhvani Batra, Peter W. Cook, Kara Moser, Adrian Paskey, Jason Caravas, Benjamin Rambo-Martin, Shatavia Morrison, Christopher Gulvick, Scott Sammons, Yvette Unoarumhi, Darlene Wagner, Matthew Schmeier, Cyndi Clark, Patrick Campbell, Rob Case, Vikramsinha Ghorpade, Holly Houdeshell, Ola Kvalvaag, Dillon Nall, Ethan Sanders, Alec Vest, Shaun Westlund, Matthew Hardison, Clinton R. Paden, Duncan MacCannell                                                                                                                                                                                                                                                                                                                                                               |
| EPI_ISL_1704708                                                                                                                                                                                                                              | Northwestern Memorial Hospital                                                                                     | Northwestern University - Ozer Lab                                                                                     | Adam Meijer, Harry Vennema, Dirk Eggink, Jeroen Cremer, Sharon van den Brink, Bas van der Veer, AnneMarie van den Brandt, Lisa Wijsman, Kim Freriks, Ryanne Jaarsma, Eunice Then, Jolienke Hardeman, Lynn Aarts, Sanne Bos, Melissa van Tuil, Robert Kohl, Linda van de Nes, Sjoerd Kulling, James Groot, Florian Zwagemaker, Dennis Schmitz, Annelies Kroneman, Karim Hajji, Chantal Reusken, on behalf of the national COVID-19 response team                                                                                                                                                                                                                                                                                                                                                   |
| EPI_ISL_1704740                                                                                                                                                                                                                              | Lurie Children's Hospital of Chicago                                                                               | Northwestern University - Ozer Lab                                                                                     | Ramon Lorenzo-Redondo, Lacy M. Simons, Taylor J. Dean, Chad J. Achenbach, Lawrence J. Jennings, Chao Qi, Michael G. Ison, Judd F. Hultquist, Egon A. Ozer                                                                                                                                                                                                                                                                                                                                                                                                                                                                                                                                                                                                                                         |
| EPI_ISL_1704775                                                                                                                                                                                                                              | Northwestern Memorial Hospital                                                                                     | Northwestern University - Ozer Lab                                                                                     | Ramon Lorenzo-Redondo, Lacy M. Simons, Taylor J. Dean, Chad J. Achenbach, Lawrence J. Jennings, Chao Qi, Michael G. Ison, Judd F. Hultquist, Egon A. Ozer                                                                                                                                                                                                                                                                                                                                                                                                                                                                                                                                                                                                                                         |
| EPI_ISL_1707095                                                                                                                                                                                                                              | USC Clinical Lab                                                                                                   | Los Angeles County PHL                                                                                                 | P. Hemarajata et al.                                                                                                                                                                                                                                                                                                                                                                                                                                                                                                                                                                                                                                                                                                                                                                              |
| EPI_ISL_1707373                                                                                                                                                                                                                              | Sonora Quest Laboratories                                                                                          | TGen North                                                                                                             | *Jolene Bowers, Heather Centner, Chris French, Hayley Yaglom, Ashlyn Pfeiffer, Darrin Lemmer, Dave Engelthaler, The Arizona COVID Genomics Union (ACGU)*                                                                                                                                                                                                                                                                                                                                                                                                                                                                                                                                                                                                                                          |
| EPI_ISL_1708250                                                                                                                                                                                                                              | Illinois Department of Public Health - Springfield Lab                                                             | Illinois Department of Public Health - Springfield Lab                                                                 | Bryan Sim, Gordon McCall                                                                                                                                                                                                                                                                                                                                                                                                                                                                                                                                                                                                                                                                                                                                                                          |
| EPI_ISL_1708542, EPI_ISL_1708573                                                                                                                                                                                                             | Gundersen Clinical Microbiology Laboratory                                                                         | Kabara Cancer Research Institute                                                                                       | Craig S. Richmond, Paraic A. Kenny                                                                                                                                                                                                                                                                                                                                                                                                                                                                                                                                                                                                                                                                                                                                                                |
| EPI_ISL_671745                                                                                                                                                                                                                               | DOHMH Riverside                                                                                                    | New York City Public Health Laboratory                                                                                 | Jade Wang, et al.                                                                                                                                                                                                                                                                                                                                                                                                                                                                                                                                                                                                                                                                                                                                                                                 |
| EPI_ISL_765493                                                                                                                                                                                                                               | MONTEFIORE MEDICAL CENTER LABORATORIES                                                                             | Wadsworth Center, New York State Department.of Health                                                                  | Kirsten St. George, Daryl M. Lamson, Alexis Russel, Matthew Shudt, Melissa A Leisner, Jonathan Plitnick, Navjot Singh, John Kelly, Sara Griesemer, Erasmus Schneider, Erica Lasek-Nesselquist                                                                                                                                                                                                                                                                                                                                                                                                                                                                                                                                                                                                     |
| EPI_ISL_794288                                                                                                                                                                                                                               | Columbia University Irving Medical Center                                                                          | Wadsworth Center, New York State Department.of Health                                                                  | Kirsten St. George, Daryl M. Lamson, Alexis Russel, Matthew Shudt, Melissa A Leisner, Jonathan Plitnick, Navjot Singh, John Kelly, Sara Griesemer, Erasmus Schneider, Erica Lasek-Nesselquist                                                                                                                                                                                                                                                                                                                                                                                                                                                                                                                                                                                                     |
| EPI_ISL_801975                                                                                                                                                                                                                               | MSHS Clinical Microbiology Laboratories                                                                            | MSHS Pathogen Surveillance Program                                                                                     | Ana S. Gonzalez-Reiche, Hala Alshammmary, Mitchell J. Sullivan, Brienne Ciferri, Ajay Obla, Angela Amoako, Mahmoud Awawda, Elena Hirsch, Ashley S. Salimbanon, Levy Sominsky, Katherine Beach, Kayla Russo, Charles Gleason, Sheldie Fabre, Giulio Kleiner, Zenab Khan, Bremy Albuquerque, Adriana van de Guchte, Komal Srivastava, Matthew M. Hernandez, Jayeeta Dutta, Denise Jurczynszak, Emily Ferreri, Rachel Chernet, Nancy Francoeur, Betsaida Salom Melo, Irina Oussenko, Gintaras Deikus, Juan Soto, Shwetha Hara Sridhar, Ying-Chih Wang, Kathryn Twyman, Andrew Kasarskis, Deena R. Altman, Robert Sebra, Adolfo Garcia-Sastre, Marta Luksza, Gopi Patel, Sarah Schaefer, Melissa Gitman, Michael D. Nowak, Alberto Paniz-Mondolfi, Emilia Mia Sordillo, Viviana Simon, Harm van Bakel |
| EPI_ISL_802788                                                                                                                                                                                                                               | Columbia University Irving Medical Center                                                                          | Wadsworth Center, New York State Department.of Health                                                                  | Kirsten St. George, Daryl M. Lamson, Alexis Russel, Matthew Shudt, Melissa A Leisner, Jonathan Plitnick, Navjot Singh, John Kelly, Sara Griesemer, Erasmus Schneider, Erica Lasek-Nesselquist                                                                                                                                                                                                                                                                                                                                                                                                                                                                                                                                                                                                     |
| EPI_ISL_812733                                                                                                                                                                                                                               | DOHMH Corona                                                                                                       | New York City Public Health Laboratory                                                                                 | Jade Wang, et al.                                                                                                                                                                                                                                                                                                                                                                                                                                                                                                                                                                                                                                                                                                                                                                                 |
| EPI_ISL_833137                                                                                                                                                                                                                               | Laboratorio de Ecologia de Doencas Transmissíveis na Amazonia, Instituto Leonidas e Maria Deane - Fiocruz Amazonia | Laboratorio de Ecologia de Doencas Transmissíveis na Amazonia, Instituto Leonidas e Maria Deane - Fiocruz Amazonia     | Valdinete Nascimento, Victor Souza, André Corado, Fernanda Nascimento, George Silva, Ágatha Costa, Debora Duarte, Karina Pessoa, Matilde Mejia, Luciana Gonçalves, Maria Júlia Brandão, Michele Jesus, Felipe Naveca on behalf of the Fiocruz COVID-19 Genomic Surveillance Network                                                                                                                                                                                                                                                                                                                                                                                                                                                                                                               |
| EPI_ISL_854454, EPI_ISL_854455, EPI_ISL_854457                                                                                                                                                                                               | MONTEFIORE MEDICAL CENTER LABORATORIES                                                                             | Wadsworth Center, New York State Department of Health                                                                  | Kirsten St. George, Daryl M. Lamson, Alexis Russel, Matthew Shudt, Melissa A Leisner, Jonathan Plitnick, Navjot Singh, John Kelly, Sara Griesemer, Erasmus Schneider, Erica Lasek-Nesselquist                                                                                                                                                                                                                                                                                                                                                                                                                                                                                                                                                                                                     |

|                                                                                                                                                                                                                                                                                                                                                                                                                                                                                                                                                                                                                                                                                                                                                                                                                |                                                                            |                                                                                                                            |                                                                                                                                                                                                                                                                                                                                                                                                                                                                                                                                                                                                                                                                                                                                                                                                                                                     |
|----------------------------------------------------------------------------------------------------------------------------------------------------------------------------------------------------------------------------------------------------------------------------------------------------------------------------------------------------------------------------------------------------------------------------------------------------------------------------------------------------------------------------------------------------------------------------------------------------------------------------------------------------------------------------------------------------------------------------------------------------------------------------------------------------------------|----------------------------------------------------------------------------|----------------------------------------------------------------------------------------------------------------------------|-----------------------------------------------------------------------------------------------------------------------------------------------------------------------------------------------------------------------------------------------------------------------------------------------------------------------------------------------------------------------------------------------------------------------------------------------------------------------------------------------------------------------------------------------------------------------------------------------------------------------------------------------------------------------------------------------------------------------------------------------------------------------------------------------------------------------------------------------------|
| EPI_ISL_857056, EPI_ISL_857060                                                                                                                                                                                                                                                                                                                                                                                                                                                                                                                                                                                                                                                                                                                                                                                 | OCME Office Of Chief Medical Examiner                                      | New York City Public Health Laboratory                                                                                     | Jade Wang, et al.                                                                                                                                                                                                                                                                                                                                                                                                                                                                                                                                                                                                                                                                                                                                                                                                                                   |
| EPI_ISL_857163                                                                                                                                                                                                                                                                                                                                                                                                                                                                                                                                                                                                                                                                                                                                                                                                 | DOHMH Central Harlem                                                       | New York City Public Health Laboratory                                                                                     | Jade Wang, et al.                                                                                                                                                                                                                                                                                                                                                                                                                                                                                                                                                                                                                                                                                                                                                                                                                                   |
| EPI_ISL_857164                                                                                                                                                                                                                                                                                                                                                                                                                                                                                                                                                                                                                                                                                                                                                                                                 | DOHMH Morrisania                                                           | New York City Public Health Laboratory                                                                                     | Jade Wang, et al.                                                                                                                                                                                                                                                                                                                                                                                                                                                                                                                                                                                                                                                                                                                                                                                                                                   |
| EPI_ISL_861112                                                                                                                                                                                                                                                                                                                                                                                                                                                                                                                                                                                                                                                                                                                                                                                                 | New York Presbyterian Hospital                                             | Wadsworth Center, New York State Department of Health                                                                      | Kirsten St. George, Daryl M. Lamson, Alexis Russel, Matthew Shudt, Melissa A Leisner, Jonathan Plitnick, Navjot Singh, John Kelly, Erasmus Schneider, Erica Lasek-Nesselquist                                                                                                                                                                                                                                                                                                                                                                                                                                                                                                                                                                                                                                                                       |
| EPI_ISL_861244, EPI_ISL_861267, EPI_ISL_861278, EPI_ISL_861280, EPI_ISL_861291, EPI_ISL_861308, EPI_ISL_861313                                                                                                                                                                                                                                                                                                                                                                                                                                                                                                                                                                                                                                                                                                 | MONTEFIORE MEDICAL CENTER LABORATORIES                                     | Wadsworth Center, New York State Department of Health                                                                      | Kirsten St. George, Daryl M. Lamson, Alexis Russel, Matthew Shudt, Melissa A Leisner, Jonathan Plitnick, Navjot Singh, John Kelly, Erasmus Schneider, Erica Lasek-Nesselquist                                                                                                                                                                                                                                                                                                                                                                                                                                                                                                                                                                                                                                                                       |
| EPI_ISL_861353, EPI_ISL_861361                                                                                                                                                                                                                                                                                                                                                                                                                                                                                                                                                                                                                                                                                                                                                                                 | WESTCHESTER MEDICAL CENTER                                                 | Wadsworth Center, New York State Department of Health                                                                      | Kirsten St. George, Daryl M. Lamson, Alexis Russel, Matthew Shudt, Melissa A Leisner, Jonathan Plitnick, Navjot Singh, John Kelly, Erasmus Schneider, Erica Lasek-Nesselquist                                                                                                                                                                                                                                                                                                                                                                                                                                                                                                                                                                                                                                                                       |
| EPI_ISL_883333                                                                                                                                                                                                                                                                                                                                                                                                                                                                                                                                                                                                                                                                                                                                                                                                 | DOHMH Riverside                                                            | New York City Public Health Laboratory                                                                                     | Jade Wang, et al.                                                                                                                                                                                                                                                                                                                                                                                                                                                                                                                                                                                                                                                                                                                                                                                                                                   |
| EPI_ISL_883339                                                                                                                                                                                                                                                                                                                                                                                                                                                                                                                                                                                                                                                                                                                                                                                                 | DOHMH Chelsea                                                              | New York City Public Health Laboratory                                                                                     | Jade Wang, et al.                                                                                                                                                                                                                                                                                                                                                                                                                                                                                                                                                                                                                                                                                                                                                                                                                                   |
| EPI_ISL_883340, EPI_ISL_883342                                                                                                                                                                                                                                                                                                                                                                                                                                                                                                                                                                                                                                                                                                                                                                                 | DOHMH PHL                                                                  | New York City Public Health Laboratory                                                                                     | Jade Wang, et al.                                                                                                                                                                                                                                                                                                                                                                                                                                                                                                                                                                                                                                                                                                                                                                                                                                   |
| EPI_ISL_883344                                                                                                                                                                                                                                                                                                                                                                                                                                                                                                                                                                                                                                                                                                                                                                                                 | OCME Office Of Chief Medical Examiner                                      | New York City Public Health Laboratory                                                                                     | Jade Wang, et al.                                                                                                                                                                                                                                                                                                                                                                                                                                                                                                                                                                                                                                                                                                                                                                                                                                   |
| EPI_ISL_883346                                                                                                                                                                                                                                                                                                                                                                                                                                                                                                                                                                                                                                                                                                                                                                                                 | DOHMH PHL                                                                  | New York City Public Health Laboratory                                                                                     | Jade Wang, et al.                                                                                                                                                                                                                                                                                                                                                                                                                                                                                                                                                                                                                                                                                                                                                                                                                                   |
| EPI_ISL_884080                                                                                                                                                                                                                                                                                                                                                                                                                                                                                                                                                                                                                                                                                                                                                                                                 | Wadsworth Center, New York State Department of Health                      | Wadsworth Center, New York State Department of Health                                                                      | Kirsten St. George, Daryl M. Lamson, Alexis Russel, Matthew Shudt, Melissa A Leisner, Jonathan Plitnick, Navjot Singh, John Kelly, Erasmus Schneider, Erica Lasek-Nesselquist                                                                                                                                                                                                                                                                                                                                                                                                                                                                                                                                                                                                                                                                       |
| EPI_ISL_886531, EPI_ISL_888376                                                                                                                                                                                                                                                                                                                                                                                                                                                                                                                                                                                                                                                                                                                                                                                 | Labcorp                                                                    | Genomics and Discovery, Respiratory Viruses Branch, Division of Viral Diseases, Centers for Disease Control and Prevention | Peter W. Cook,Dhwani Batra,Ben L. Rambo-Martin,Summer Galloway,Brian Krueger,Minoo Agarwal,Eyad Almasri,Debbie Boles,Ayla Burns,Nuthawin Charoensri,Oren Cohen,Susan Countryman,Mary Ann Cristobal,Bobbi Croy,Suzanne Dale,Hrushikesh Deshmukh,Amanda Douglas,Vincent Drouillon,Marcia Eisenberg,Howard Engler,Rama Ghatti,Prashant Gupta,Susan Hicks,Jake Humphrey,Lax Iyer,Manoj Jain,Mohan Kolli,Tim Kuphal,Stanley Letovsky,Michael Levandoski,Craig Lukasik,Jonathan Meltzer,Brian Norvell,Mindy Nye,Scott Parker,Christos Petropoulos,John Pruitt,Steven Ragan,Scott Ryan,Mike Sapeta,Jana Schroth,Suresh Babu Selvaraju,Goran Stevovic,Amanda Suchanek,Andrea Throop,Lyndon Tilson,Thomas Urban,Joe Voshell,Kimberly Wagner,Jonathan Williams,Mary Williamson,Qian Zeng,Tricia Zwiefelhofer,Clinton R. Paden,Suxiang Tong,Duncan MacCannell, |
| EPI_ISL_896227, EPI_ISL_896232, EPI_ISL_896233, EPI_ISL_896395                                                                                                                                                                                                                                                                                                                                                                                                                                                                                                                                                                                                                                                                                                                                                 | Columbia University Irving Medical Center                                  | Wadsworth Center, New York State Department of Health                                                                      | Kirsten St. George, Daryl M. Lamson, Alexis Russel, Matthew Shudt, Melissa A Leisner, Jonathan Plitnick, Navjot Singh, John Kelly, Erasmus Schneider, Erica Lasek-Nesselquist                                                                                                                                                                                                                                                                                                                                                                                                                                                                                                                                                                                                                                                                       |
| EPI_ISL_896532                                                                                                                                                                                                                                                                                                                                                                                                                                                                                                                                                                                                                                                                                                                                                                                                 | New York Presbyterian Hospital                                             | Wadsworth Center, New York State Department of Health                                                                      | Kirsten St. George, Daryl M. Lamson, Alexis Russel, Matthew Shudt, Melissa A Leisner, Jonathan Plitnick, Navjot Singh, John Kelly, Erasmus Schneider, Erica Lasek-Nesselquist                                                                                                                                                                                                                                                                                                                                                                                                                                                                                                                                                                                                                                                                       |
| EPI_ISL_906837, EPI_ISL_906838, EPI_ISL_906839                                                                                                                                                                                                                                                                                                                                                                                                                                                                                                                                                                                                                                                                                                                                                                 | National Public Health Laboratory, National Centre for Infectious Diseases | National Public Health Laboratory, National Centre for Infectious Diseases                                                 | Tze Minn Mak, Zhenyang Zhou, Lin Cui, Raymond Tzer Pin Lin                                                                                                                                                                                                                                                                                                                                                                                                                                                                                                                                                                                                                                                                                                                                                                                          |
| EPI_ISL_936256, EPI_ISL_936261, EPI_ISL_936276, EPI_ISL_936292, EPI_ISL_936299                                                                                                                                                                                                                                                                                                                                                                                                                                                                                                                                                                                                                                                                                                                                 | MONTEFIORE MEDICAL CENTER LABORATORIES                                     | Wadsworth Center, New York State Department of Health                                                                      | Kirsten St. George, Daryl M. Lamson, Alexis Russel, Matthew Shudt, Melissa A Leisner, Jonathan Plitnick, Navjot Singh, John Kelly, Erasmus Schneider, Erica Lasek-Nesselquist                                                                                                                                                                                                                                                                                                                                                                                                                                                                                                                                                                                                                                                                       |
| EPI_ISL_937126                                                                                                                                                                                                                                                                                                                                                                                                                                                                                                                                                                                                                                                                                                                                                                                                 | DOHMH Riverside                                                            | New York City Public Health Laboratory                                                                                     | Jade Wang, et al.                                                                                                                                                                                                                                                                                                                                                                                                                                                                                                                                                                                                                                                                                                                                                                                                                                   |
| EPI_ISL_937155                                                                                                                                                                                                                                                                                                                                                                                                                                                                                                                                                                                                                                                                                                                                                                                                 | DOHMH PHL                                                                  | New York City Public Health Laboratory                                                                                     | Jade Wang, et al.                                                                                                                                                                                                                                                                                                                                                                                                                                                                                                                                                                                                                                                                                                                                                                                                                                   |
| EPI_ISL_937190                                                                                                                                                                                                                                                                                                                                                                                                                                                                                                                                                                                                                                                                                                                                                                                                 | OCME Office Of Chief Medical Examiner                                      | New York City Public Health Laboratory                                                                                     | Jade Wang, et al.                                                                                                                                                                                                                                                                                                                                                                                                                                                                                                                                                                                                                                                                                                                                                                                                                                   |
| EPI_ISL_937191                                                                                                                                                                                                                                                                                                                                                                                                                                                                                                                                                                                                                                                                                                                                                                                                 | Department of Homeless Services                                            | New York City Public Health Laboratory                                                                                     | Jade Wang, et al.                                                                                                                                                                                                                                                                                                                                                                                                                                                                                                                                                                                                                                                                                                                                                                                                                                   |
| EPI_ISL_937201                                                                                                                                                                                                                                                                                                                                                                                                                                                                                                                                                                                                                                                                                                                                                                                                 | DOHMH Fort Greene                                                          | New York City Public Health Laboratory                                                                                     | Jade Wang, et al.                                                                                                                                                                                                                                                                                                                                                                                                                                                                                                                                                                                                                                                                                                                                                                                                                                   |
| EPI_ISL_937206                                                                                                                                                                                                                                                                                                                                                                                                                                                                                                                                                                                                                                                                                                                                                                                                 | DOHMH Morrisania                                                           | New York City Public Health Laboratory                                                                                     | Jade Wang, et al.                                                                                                                                                                                                                                                                                                                                                                                                                                                                                                                                                                                                                                                                                                                                                                                                                                   |
| EPI_ISL_937211, EPI_ISL_937215                                                                                                                                                                                                                                                                                                                                                                                                                                                                                                                                                                                                                                                                                                                                                                                 | DOHMH PHL                                                                  | New York City Public Health Laboratory                                                                                     | Jade Wang, et al.                                                                                                                                                                                                                                                                                                                                                                                                                                                                                                                                                                                                                                                                                                                                                                                                                                   |
| EPI_ISL_937218                                                                                                                                                                                                                                                                                                                                                                                                                                                                                                                                                                                                                                                                                                                                                                                                 | DOHMH Chelsea                                                              | New York City Public Health Laboratory                                                                                     | Jade Wang, et al.                                                                                                                                                                                                                                                                                                                                                                                                                                                                                                                                                                                                                                                                                                                                                                                                                                   |
| EPI_ISL_937236                                                                                                                                                                                                                                                                                                                                                                                                                                                                                                                                                                                                                                                                                                                                                                                                 | DOHMH Morrisania                                                           | New York City Public Health Laboratory                                                                                     | Jade Wang, et al.                                                                                                                                                                                                                                                                                                                                                                                                                                                                                                                                                                                                                                                                                                                                                                                                                                   |
| EPI_ISL_937247, EPI_ISL_937252, EPI_ISL_937255                                                                                                                                                                                                                                                                                                                                                                                                                                                                                                                                                                                                                                                                                                                                                                 | OCME Office Of Chief Medical Examiner                                      | New York City Public Health Laboratory                                                                                     | Jade Wang, et al.                                                                                                                                                                                                                                                                                                                                                                                                                                                                                                                                                                                                                                                                                                                                                                                                                                   |
| EPI_ISL_937272                                                                                                                                                                                                                                                                                                                                                                                                                                                                                                                                                                                                                                                                                                                                                                                                 | NYC HH Elmhurst Hospital Medical Center                                    | New York City Public Health Laboratory                                                                                     | Jade Wang, et al.                                                                                                                                                                                                                                                                                                                                                                                                                                                                                                                                                                                                                                                                                                                                                                                                                                   |
| EPI_ISL_966264                                                                                                                                                                                                                                                                                                                                                                                                                                                                                                                                                                                                                                                                                                                                                                                                 | NYU Langone Health                                                         | Departments of Pathology and Medicine, New York University School of Medicine                                              | Adriana Heguy, Dacia Dimartino, Emily Guzman, Christian Marier, Peter Meyn, Sitharam Ramaswami, Gael Westby, Paul Zappile, Yutong Zhang, Paolo Cotzia, Guiqing Wang                                                                                                                                                                                                                                                                                                                                                                                                                                                                                                                                                                                                                                                                                 |
| EPI_ISL_966387                                                                                                                                                                                                                                                                                                                                                                                                                                                                                                                                                                                                                                                                                                                                                                                                 | DOHMH Jamaica                                                              | New York City Public Health Laboratory                                                                                     | Jade Wang, et al.                                                                                                                                                                                                                                                                                                                                                                                                                                                                                                                                                                                                                                                                                                                                                                                                                                   |
| EPI_ISL_966413                                                                                                                                                                                                                                                                                                                                                                                                                                                                                                                                                                                                                                                                                                                                                                                                 | DOHMH Central Harlem                                                       | New York City Public Health Laboratory                                                                                     | Jade Wang, et al.                                                                                                                                                                                                                                                                                                                                                                                                                                                                                                                                                                                                                                                                                                                                                                                                                                   |
| EPI_ISL_966415                                                                                                                                                                                                                                                                                                                                                                                                                                                                                                                                                                                                                                                                                                                                                                                                 | DOHMH Corona                                                               | New York City Public Health Laboratory                                                                                     | Jade Wang, et al.                                                                                                                                                                                                                                                                                                                                                                                                                                                                                                                                                                                                                                                                                                                                                                                                                                   |
| EPI_ISL_966420                                                                                                                                                                                                                                                                                                                                                                                                                                                                                                                                                                                                                                                                                                                                                                                                 | DOHMH Morrisania                                                           | New York City Public Health Laboratory                                                                                     | Jade Wang, et al.                                                                                                                                                                                                                                                                                                                                                                                                                                                                                                                                                                                                                                                                                                                                                                                                                                   |
| EPI_ISL_966424                                                                                                                                                                                                                                                                                                                                                                                                                                                                                                                                                                                                                                                                                                                                                                                                 | DOHMH Jamaica                                                              | New York City Public Health Laboratory                                                                                     | Jade Wang, et al.                                                                                                                                                                                                                                                                                                                                                                                                                                                                                                                                                                                                                                                                                                                                                                                                                                   |
| EPI_ISL_979499                                                                                                                                                                                                                                                                                                                                                                                                                                                                                                                                                                                                                                                                                                                                                                                                 | Eurofins Diatherix                                                         | Hudsonalpha Genome Sequencing Center                                                                                       | Jane Grimwood, Melissa Williams, Lori H. Handley, Joshua Stough, Leslie Malone, Stefan Brzezinski, Ada Stewart, Teresa Jones, Jenell Webber, John Lovell, Jennifer Cart, and Jeremy Schmutz                                                                                                                                                                                                                                                                                                                                                                                                                                                                                                                                                                                                                                                         |
| EPI_ISL_982461, EPI_ISL_982490, EPI_ISL_983103, EPI_ISL_983114                                                                                                                                                                                                                                                                                                                                                                                                                                                                                                                                                                                                                                                                                                                                                 | MONTEFIORE MEDICAL CENTER LABORATORIES                                     | Wadsworth Center, New York State Department of Health                                                                      | Kirsten St. George, Daryl M. Lamson, Alexis Russel, Matthew Shudt, Melissa A Leisner, Jonathan Plitnick, Navjot Singh, John Kelly, Erasmus Schneider, Erica Lasek-Nesselquist                                                                                                                                                                                                                                                                                                                                                                                                                                                                                                                                                                                                                                                                       |
| EPI_ISL_984771, EPI_ISL_984816, EPI_ISL_984817, EPI_ISL_984883, EPI_ISL_984917, EPI_ISL_984927, EPI_ISL_984930, EPI_ISL_984945, EPI_ISL_994803, EPI_ISL_994804, EPI_ISL_994824, EPI_ISL_994826, EPI_ISL_994830, EPI_ISL_994844, EPI_ISL_994853, EPI_ISL_994862, EPI_ISL_994870, EPI_ISL_994872, EPI_ISL_994876, EPI_ISL_994880, EPI_ISL_994890, EPI_ISL_994895, EPI_ISL_994925, EPI_ISL_994943, EPI_ISL_994959, EPI_ISL_994960, EPI_ISL_994966, EPI_ISL_994968, EPI_ISL_994970, EPI_ISL_994974, EPI_ISL_994986, EPI_ISL_994988, EPI_ISL_995010, EPI_ISL_995023, EPI_ISL_995026, EPI_ISL_995040, EPI_ISL_995046, EPI_ISL_995048, EPI_ISL_995060, EPI_ISL_995072, EPI_ISL_995094, EPI_ISL_995108, EPI_ISL_995110, EPI_ISL_995111, EPI_ISL_995123, EPI_ISL_995131, EPI_ISL_995147, EPI_ISL_995154, EPI_ISL_995155 | Pandemic Response Lab - NYC                                                | Pandemic Response Lab, R&D                                                                                                 |                                                                                                                                                                                                                                                                                                                                                                                                                                                                                                                                                                                                                                                                                                                                                                                                                                                     |
| see above                                                                                                                                                                                                                                                                                                                                                                                                                                                                                                                                                                                                                                                                                                                                                                                                      |                                                                            |                                                                                                                            | Henry Lee, Michael Hammerling, Melissa Hopkins, Cybill del Castillo, William Ward, Pradeep Bugga, Haiping Hao, Jon Laurent                                                                                                                                                                                                                                                                                                                                                                                                                                                                                                                                                                                                                                                                                                                          |
