# Supplementary material for: Combining genomic and epidemiological data to compare the transmissibility of SARS-CoV-2 lineages
Source: bioRxiv or medRxiv preprint supplement (doi:10.1101/2021.07.01.21259859), 2021-07-02

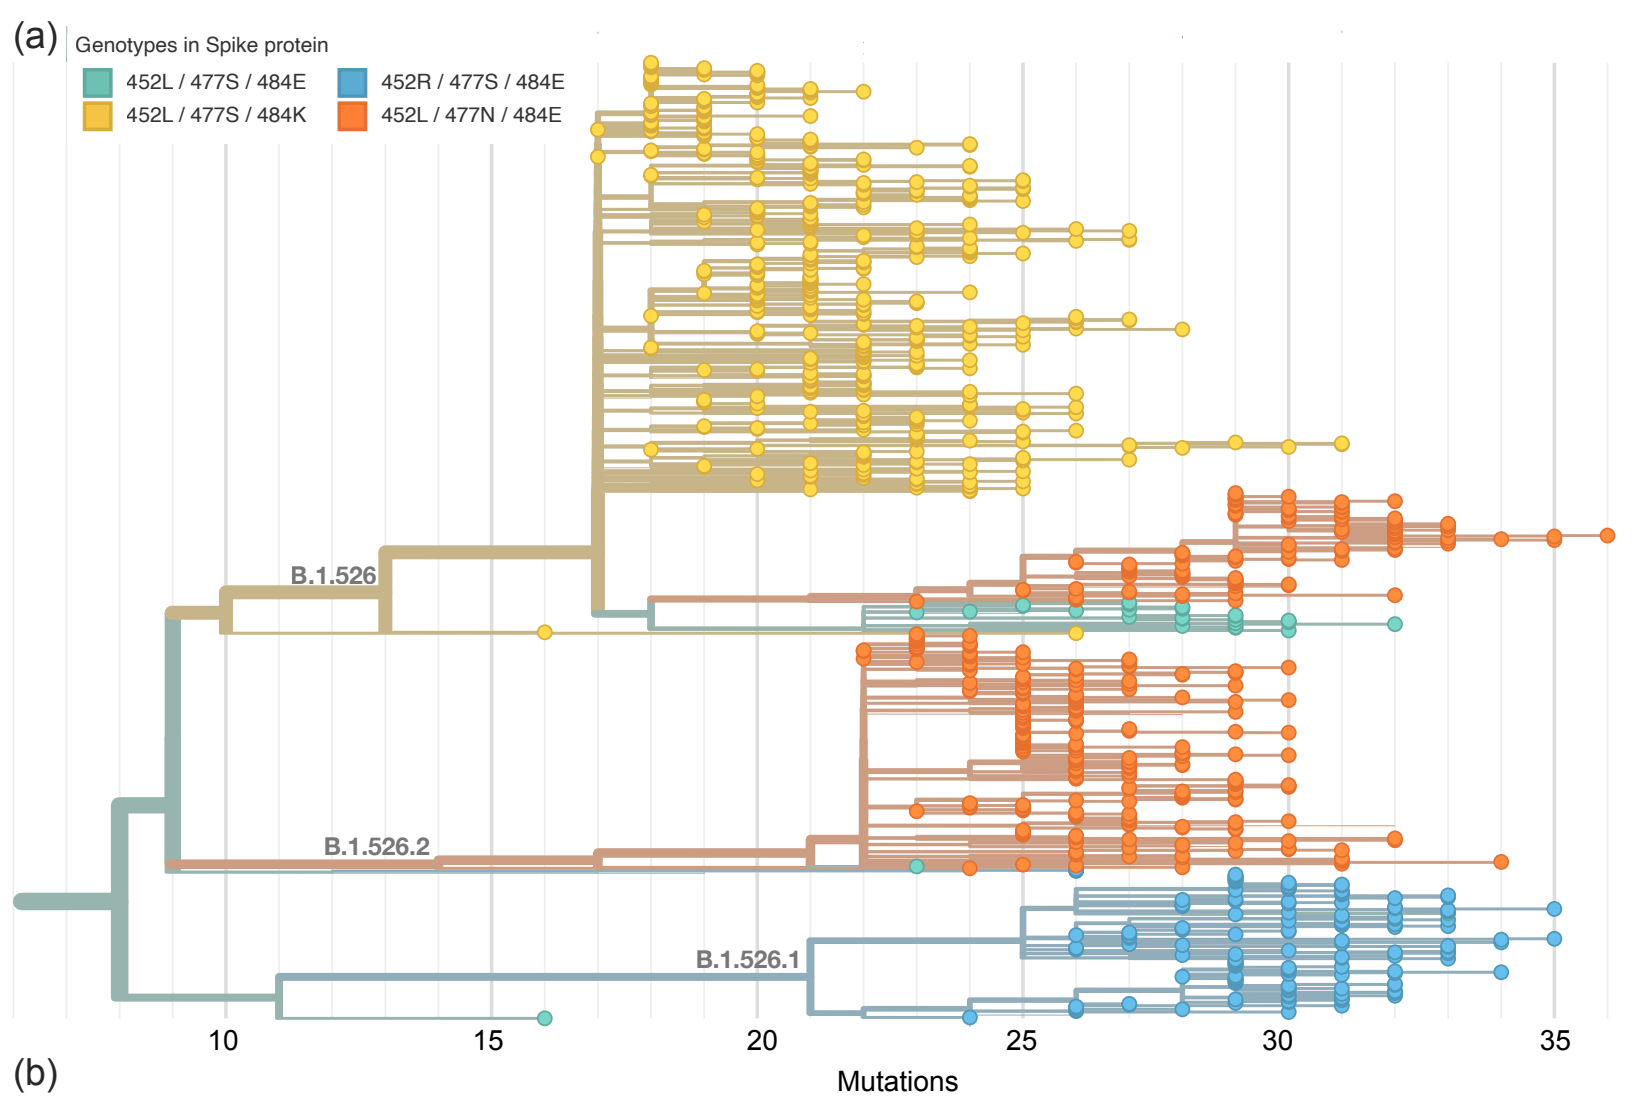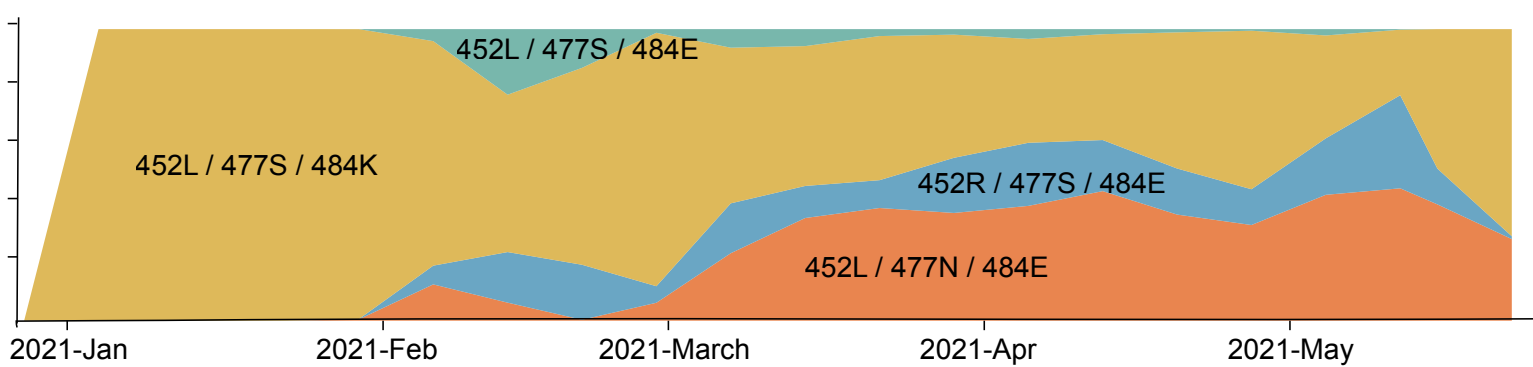

Supplement: Supplementary file [file media-3.pdf]
