# Supplementary material for: Combining genomic and epidemiological data to compare the transmissibility of SARS-CoV-2 lineages
Source: bioRxiv or medRxiv preprint supplement (doi:10.1101/2021.07.01.21259859), 2021-07-02
Supplement: Supplementary file [file media-6.pdf]

| Lineage        | Count     |  | Lineage          | Count     |
|----------------|-----------|--|------------------|-----------|
| A              | 1         |  | B.1.36.10        | 1         |
| A.2.5          | 1         |  | B.1.361          | 1         |
| A.23.1         | 1         |  | B.1.369          | 1         |
| B              | 1         |  | B.1.37           | 1         |
| B.1            | 25        |  | B.1.375          | 2         |
| B.1.1          | 12        |  | B.1.400          | 2         |
| B.1.1.1        | 3         |  | B.1.409          | 1         |
| B.1.1.192      | 7         |  | B.1.420          | 1         |
| B.1.1.28       | 3         |  | <b>B.1.427</b>   | <b>21</b> |
| B.1.1.348      | 2         |  | <b>B.1.429</b>   | <b>42</b> |
| B.1.1.372      | 1         |  | B.1.509          | 3         |
| B.1.1.416      | 1         |  | B.1.517          | 106       |
| B.1.1.420      | 1         |  | B.1.517.1        | 1         |
| B.1.1.434      | 16        |  | B.1.523          | 2         |
| B.1.1.486      | 19        |  | <b>B.1.525</b>   | <b>4</b>  |
| B.1.1.519      | 17        |  | B.1.543          | 1         |
| B.1.110.3      | 4         |  | B.1.551          | 1         |
| B.1.111        | 10        |  | B.1.568          | 6         |
| B.1.177        | 1         |  | B.1.575          | 55        |
| B.1.2          | 159       |  | B.1.575.1        | 1         |
| B.1.234        | 2         |  | B.1.577          | 2         |
| B.1.240        | 2         |  | B.1.588          | 1         |
| B.1.243        | 46        |  | B.1.596          | 9         |
| B.1.265        | 1         |  | B.1.604          | 1         |
| B.1.280        | 1         |  | <b>B.1.617.2</b> | <b>2</b>  |
| B.1.298        | 1         |  | B.1.621          | 1         |
| B.1.311        | 2         |  | C.37             | 5         |
| B.1.314        | 1         |  | <b>P.1</b>       | <b>40</b> |
| B.1.320        | 1         |  | R.1              | 33        |
| B.1.349        | 4         |  | R.2              | 3         |
| <b>B.1.351</b> | <b>17</b> |  |                  |           |
